# Supplementary material for: Evaluation of GRCh38 and de novo haploid genome assemblies demonstrates the enduring quality of the reference assembly
Source: Genome Res. 2017 May;27(5):849–64. doi: 10.1101/gr.213611.116 (PMC5411779; doi:10.1101/gr.213611.116)
Supplement: Supplemental Material [file supp_gr.213611.116_Supplemental_Worksheet_S1.xlsx]

## Sheet: gencode23_problem_txpts
Accession	GeneID	GeneName	Description	PMID_25086666	MedicalExome	GRCh38 split	GRCh38 low coverage	GRCh38 not found	GRCh38 not accepted	GRCh37 split	GRCh37 low coverage	GRCh37 not found	GRCh37 not accepted
ENST00000304465.7	ENSG00000171943.11	SRGAP2C	ENST00000304465.7|ENSG00000171943.11|OTTHUMG00000041445.3|-|SRGAP2C-201|SRGAP2C|1477|protein_coding|	0	0	0	0	0	0	1	1	0	0
ENST00000309415.7	ENSG00000172985.10	SH3RF3	ENST00000309415.7|ENSG00000172985.10|OTTHUMG00000153439.6|OTTHUMT00000331210.4|SH3RF3-001|SH3RF3|5803|protein_coding|	0	0	0	0	0	0	1	1	0	0
ENST00000317673.8	ENSG00000248333.7	CDK11B	ENST00000317673.8|ENSG00000248333.7|OTTHUMG00000078638.6|-|CDK11B-201|CDK11B|2369|protein_coding|	1	0	0	0	0	0	0	1	0	0
ENST00000319080.11	ENSG00000175727.13	MLXIP	ENST00000319080.11|ENSG00000175727.13|OTTHUMG00000168953.3|OTTHUMT00000401718.2|MLXIP-001|MLXIP|8427|protein_coding|	0	0	0	0	0	0	0	1	0	0
ENST00000322066.3	ENSG00000177684.3	DEFB114	ENST00000322066.3|ENSG00000177684.3|OTTHUMG00000160209.1|OTTHUMT00000359665.1|DEFB114-001|DEFB114|253|protein_coding|	0	0	0	0	1	0	0	0	1	0
ENST00000323770.7	ENSG00000179412.10	HNRNPCL4	ENST00000323770.7|ENSG00000179412.10|OTTHUMG00000189238.1|OTTHUMT00000479154.1|HNRNPCL4-001|HNRNPCL4|882|protein_coding|	0	0	0	0	0	0	0	0	0	1
ENST00000326153.8	ENSG00000178605.12	GTPBP6	ENST00000326153.8|ENSG00000178605.12|OTTHUMG00000022694.3|OTTHUMT00000058882.2|GTPBP6-001|GTPBP6|1907|protein_coding|	0	0	0	0	0	0	0	1	0	0
ENST00000328957.12	ENSG00000182870.12	GALNT9	ENST00000328957.12|ENSG00000182870.12|OTTHUMG00000168256.4|OTTHUMT00000402967.1|GALNT9-009|GALNT9|2410|protein_coding|	0	1	1	1	0	0	1	1	0	0
ENST00000330992.8	ENSG00000158623.14	COPG2	ENST00000330992.8|ENSG00000158623.14|OTTHUMG00000155364.4|OTTHUMT00000477649.1|COPG2-003|COPG2|3073|protein_coding|	0	0	0	0	0	0	0	1	0	1
ENST00000331340.7	ENSG00000185811.16	IKZF1	ENST00000331340.7|ENSG00000185811.16|OTTHUMG00000155907.1|OTTHUMT00000342242.1|IKZF1-001|IKZF1|6189|protein_coding|	1	1	0	0	0	0	1	1	0	0
ENST00000332007.7	ENSG00000130226.16	DPP6	ENST00000332007.7|ENSG00000130226.16|OTTHUMG00000151511.2|OTTHUMT00000348315.1|DPP6-006|DPP6|3768|protein_coding|	0	1	0	0	0	0	1	1	0	0
ENST00000335678.6	ENSG00000185974.6	GRK1	ENST00000335678.6|ENSG00000185974.6|OTTHUMG00000185528.1|OTTHUMT00000470655.1|GRK1-001|GRK1|4296|protein_coding|	0	1	1	1	0	0	1	1	0	0
ENST00000340677.9	ENSG00000248333.7	CDK11B	ENST00000340677.9|ENSG00000248333.7|OTTHUMG00000078638.6|OTTHUMT00000476675.1|CDK11B-005|CDK11B|2534|protein_coding|	1	0	0	0	0	0	0	1	0	0
ENST00000341832.10	ENSG00000248333.7	CDK11B	ENST00000341832.10|ENSG00000248333.7|OTTHUMG00000078638.6|OTTHUMT00000444101.5|CDK11B-001|CDK11B|2998|protein_coding|	1	0	0	0	0	0	0	1	0	0
ENST00000342247.9	ENSG00000099954.18	CECR2	ENST00000342247.9|ENSG00000099954.18|OTTHUMG00000150072.9|-|CECR2-202|CECR2|6178|protein_coding|	0	1	0	0	0	0	0	1	0	0
ENST00000342645.7	ENSG00000064393.15	HIPK2	ENST00000342645.7|ENSG00000064393.15|OTTHUMG00000157704.3|-|HIPK2-201|HIPK2|2937|protein_coding|	0	0	0	0	0	0	1	1	0	0
ENST00000343574.9	ENSG00000185811.16	IKZF1	ENST00000343574.9|ENSG00000185811.16|OTTHUMG00000155907.1|-|IKZF1-201|IKZF1|5925|protein_coding|	1	1	0	0	0	0	1	1	0	0
ENST00000349824.8	ENSG00000185811.16	IKZF1	ENST00000349824.8|ENSG00000185811.16|OTTHUMG00000155907.1|-|IKZF1-203|IKZF1|5757|protein_coding|	1	1	0	0	0	0	1	1	0	0
ENST00000354883.10	ENSG00000144741.17	SLC25A26	ENST00000354883.10|ENSG00000144741.17|OTTHUMG00000149917.6|OTTHUMT00000313894.2|SLC25A26-001|SLC25A26|2673|protein_coding|	0	0	0	0	0	0	1	1	0	0
ENST00000357364.8	ENSG00000185811.16	IKZF1	ENST00000357364.8|ENSG00000185811.16|OTTHUMG00000155907.1|-|IKZF1-204|IKZF1|5925|protein_coding|	1	1	0	0	0	0	1	1	0	0
ENST00000359197.9	ENSG00000185811.16	IKZF1	ENST00000359197.9|ENSG00000185811.16|OTTHUMG00000155907.1|OTTHUMT00000342243.1|IKZF1-002|IKZF1|3487|protein_coding|	1	1	0	0	0	0	1	1	0	0
ENST00000359570.9	ENSG00000168918.13	INPP5D	ENST00000359570.9|ENSG00000168918.13|OTTHUMG00000133688.6|OTTHUMT00000257930.3|INPP5D-001|INPP5D|5274|protein_coding|	1	1	0	0	0	0	1	1	0	0
ENST00000360272.5	ENSG00000189190.8	ZNF600	ENST00000360272.5|ENSG00000189190.8|OTTHUMG00000182686.1|-|ZNF600-201|ZNF600|1787|protein_coding|	0	0	0	0	0	1	0	0	0	1
ENST00000361227.2	ENSG00000198840.2	MT-ND3	ENST00000361227.2|ENSG00000198840.2|-|-|MT-ND3-201|MT-ND3|346|protein_coding|	0	0	0	1	0	1	0	1	0	1
ENST00000361335.1	ENSG00000212907.2	MT-ND4L	ENST00000361335.1|ENSG00000212907.2|-|-|MT-ND4L-201|MT-ND4L|297|protein_coding|	0	0	0	0	1	0	0	0	1	0
ENST00000361381.2	ENSG00000198886.2	MT-ND4	ENST00000361381.2|ENSG00000198886.2|-|-|MT-ND4-201|MT-ND4|1378|protein_coding|	0	0	0	0	0	1	0	0	0	1
ENST00000361390.2	ENSG00000198888.2	MT-ND1	ENST00000361390.2|ENSG00000198888.2|-|-|MT-ND1-201|MT-ND1|956|protein_coding|	0	0	0	1	0	0	0	1	0	0
ENST00000361567.2	ENSG00000198786.2	MT-ND5	ENST00000361567.2|ENSG00000198786.2|-|-|MT-ND5-201|MT-ND5|1812|protein_coding|	0	0	0	0	0	1	0	0	0	1
ENST00000361681.2	ENSG00000198695.2	MT-ND6	ENST00000361681.2|ENSG00000198695.2|-|-|MT-ND6-201|MT-ND6|525|protein_coding|	0	0	0	0	0	1	0	0	0	1
ENST00000361789.2	ENSG00000198727.2	MT-CYB	ENST00000361789.2|ENSG00000198727.2|-|-|MT-CYB-201|MT-CYB|1141|protein_coding|	0	0	0	1	0	1	0	1	0	1
ENST00000361851.1	ENSG00000228253.1	MT-ATP8	ENST00000361851.1|ENSG00000228253.1|-|-|MT-ATP8-201|MT-ATP8|207|protein_coding|	0	0	0	0	1	0	0	0	1	0
ENST00000362079.2	ENSG00000198938.2	MT-CO3	ENST00000362079.2|ENSG00000198938.2|-|-|MT-CO3-201|MT-CO3|784|protein_coding|	0	0	0	1	0	0	0	1	0	0
ENST00000364829.1	ENSG00000201699.1	RNU1-59P	ENST00000364829.1|ENSG00000201699.1|-|-|RNU1-59P-201|RNU1-59P|162|snRNA|	0	0	0	0	0	0	0	0	1	0
ENST00000366224.2	ENSG00000203402.2	RP11-571E6.3	ENST00000366224.2|ENSG00000203402.2|OTTHUMG00000021439.1|OTTHUMT00000056411.1|RP11-571E6.3-001|RP11-571E6.3|477|lincRNA|	0	0	0	0	0	1	0	0	0	1
ENST00000366872.9	ENSG00000203697.11	CAPN8	ENST00000366872.9|ENSG00000203697.11|OTTHUMG00000037378.7|-|CAPN8-201|CAPN8|2427|protein_coding|	0	0	1	1	0	0	0	1	0	0
ENST00000367123.7	ENSG00000171943.11	SRGAP2C	ENST00000367123.7|ENSG00000171943.11|OTTHUMG00000041445.3|OTTHUMT00000099264.3|SRGAP2C-001|SRGAP2C|7204|protein_coding|	0	0	0	0	0	0	0	1	0	0
ENST00000369373.9	ENSG00000162825.16	NBPF20	ENST00000369373.9|ENSG00000162825.16|OTTHUMG00000042439.6|OTTHUMT00000100689.6|NBPF20-001|NBPF20|18760|protein_coding|	0	0	0	0	0	0	0	1	0	0
ENST00000377540.5	ENSG00000204815.8	TTC25	ENST00000377540.5|ENSG00000204815.8|OTTHUMG00000175837.1|OTTHUMT00000431161.1|TTC25-002|TTC25|2255|protein_coding|	0	0	0	0	0	0	0	1	0	0
ENST00000377770.7	ENSG00000130226.16	DPP6	ENST00000377770.7|ENSG00000130226.16|OTTHUMG00000151511.2|OTTHUMT00000322932.1|DPP6-003|DPP6|3710|protein_coding|	0	1	0	0	0	0	1	1	0	0
ENST00000379458.8	ENSG00000169894.17	MUC3A	ENST00000379458.8|ENSG00000169894.17|OTTHUMG00000157038.5|OTTHUMT00000347215.3|MUC3A-001|MUC3A|11226|protein_coding|	0	0	0	0	0	0	0	1	0	0
ENST00000380596.8	ENSG00000261740.5	RP11-345J4.5	ENST00000380596.8|ENSG00000261740.5|OTTHUMG00000176715.2|-|RP11-345J4.5-201|RP11-345J4.5|1444|protein_coding|	0	0	1	1	0	0	1	1	0	0
ENST00000381566.5	ENSG00000205755.10	CRLF2	ENST00000381566.5|ENSG00000205755.10|OTTHUMG00000067432.2|-|CRLF2-201|CRLF2|1545|protein_coding|	0	0	0	0	0	0	0	1	0	0
ENST00000381567.7	ENSG00000205755.10	CRLF2	ENST00000381567.7|ENSG00000205755.10|OTTHUMG00000067432.2|-|CRLF2-202|CRLF2|1013|protein_coding|	0	0	0	0	0	0	0	1	0	0
ENST00000382208.2	ENSG00000205883.2	DEFB135	ENST00000382208.2|ENSG00000205883.2|OTTHUMG00000158719.1|OTTHUMT00000351888.1|DEFB135-001|DEFB135|234|protein_coding|	0	0	0	0	1	0	0	0	1	0
ENST00000382676.1	ENSG00000206042.1	DEFA7P	ENST00000382676.1|ENSG00000206042.1|OTTHUMG00000143737.1|OTTHUMT00000289816.1|DEFA7P-001|DEFA7P|285|unprocessed_pseudogene|	0	0	0	0	1	0	0	0	1	0
ENST00000384101.1	ENSG00000206828.1	U1	ENST00000384101.1|ENSG00000206828.1|-|-|U1.1-201|U1|164|snRNA|	0	0	0	0	0	0	0	0	1	0
ENST00000385025.1	ENSG00000207758.1	MIR532	ENST00000385025.1|ENSG00000207758.1|-|-|MIR532-201|MIR532|91|miRNA|	0	0	0	0	0	0	0	0	1	0
ENST00000386347.1	ENSG00000209082.1	MT-TL1	ENST00000386347.1|ENSG00000209082.1|-|-|MT-TL1-201|MT-TL1|75|Mt_tRNA|	0	0	0	0	1	0	0	0	1	0
ENST00000387314.1	ENSG00000210049.1	MT-TF	ENST00000387314.1|ENSG00000210049.1|-|-|MT-TF-201|MT-TF|71|Mt_tRNA|	0	0	0	0	1	0	0	0	1	0
ENST00000387347.2	ENSG00000210082.2	MT-RNR2	ENST00000387347.2|ENSG00000210082.2|-|-|MT-RNR2-201|MT-RNR2|1559|Mt_rRNA|	0	0	0	1	0	1	0	1	0	1
ENST00000387365.1	ENSG00000210100.1	MT-TI	ENST00000387365.1|ENSG00000210100.1|-|-|MT-TI-201|MT-TI|69|Mt_tRNA|	0	0	0	0	1	0	0	0	1	0
ENST00000387429.1	ENSG00000210164.1	MT-TG	ENST00000387429.1|ENSG00000210164.1|-|-|MT-TG-201|MT-TG|68|Mt_tRNA|	0	0	0	0	1	0	0	0	1	0
ENST00000387449.1	ENSG00000210184.1	MT-TS2	ENST00000387449.1|ENSG00000210184.1|-|-|MT-TS2-201|MT-TS2|59|Mt_tRNA|	0	0	0	1	0	0	0	1	0	0
ENST00000387456.1	ENSG00000210191.1	MT-TL2	ENST00000387456.1|ENSG00000210191.1|-|-|MT-TL2-201|MT-TL2|71|Mt_tRNA|	0	0	0	0	1	0	0	0	1	0
ENST00000387460.2	ENSG00000210195.2	MT-TT	ENST00000387460.2|ENSG00000210195.2|-|-|MT-TT-201|MT-TT|66|Mt_tRNA|	0	0	0	0	1	0	0	0	1	0
ENST00000387461.2	ENSG00000210196.2	MT-TP	ENST00000387461.2|ENSG00000210196.2|-|-|MT-TP-201|MT-TP|68|Mt_tRNA|	0	0	0	0	1	0	0	0	1	0
ENST00000389680.2	ENSG00000211459.2	MT-RNR1	ENST00000389680.2|ENSG00000211459.2|-|-|MT-RNR1-201|MT-RNR1|954|Mt_rRNA|	0	0	1	1	0	0	1	1	0	0
ENST00000390749.2	ENSG00000263825.1	AC243772.1	ENST00000390749.2|ENSG00000263825.1|-|-|AC243772.1-201|AC243772.1|92|miRNA|	0	0	0	0	0	0	0	0	1	0
ENST00000390776.3	ENSG00000212065.3	AC244258.1	ENST00000390776.3|ENSG00000212065.3|-|-|AC244258.1-201|AC244258.1|82|miRNA|	0	0	0	0	0	0	0	0	1	0
ENST00000392971.6	ENSG00000162825.16	NBPF20	ENST00000392971.6|ENSG00000162825.16|OTTHUMG00000042439.6|-|NBPF20-201|NBPF20|18450|protein_coding|	0	0	0	0	0	0	0	1	0	0
ENST00000394183.2	ENSG00000254577.1	RP11-484D2.4	ENST00000394183.2|ENSG00000254577.1|OTTHUMG00000166399.1|OTTHUMT00000389590.1|RP11-484D2.4-001|RP11-484D2.4|183|sense_overlapping|	0	0	0	0	1	0	0	0	1	0
ENST00000398721.5	ENSG00000214643.5	DEFB133	ENST00000398721.5|ENSG00000214643.5|OTTHUMG00000187384.2|-|DEFB133-201|DEFB133|186|protein_coding|	0	0	0	0	1	0	0	0	1	0
ENST00000400841.6	ENSG00000205755.10	CRLF2	ENST00000400841.6|ENSG00000205755.10|OTTHUMG00000067432.2|OTTHUMT00000144413.2|CRLF2-001|CRLF2|1639|protein_coding|	0	0	0	0	0	0	0	1	0	0
ENST00000404039.5	ENSG00000130226.16	DPP6	ENST00000404039.5|ENSG00000130226.16|OTTHUMG00000151511.2|OTTHUMT00000322930.1|DPP6-001|DPP6|4798|protein_coding|	0	1	0	0	0	0	1	1	0	0
ENST00000406326.5	ENSG00000130226.16	DPP6	ENST00000406326.5|ENSG00000130226.16|OTTHUMG00000151511.2|OTTHUMT00000322931.1|DPP6-002|DPP6|2012|protein_coding|	0	1	0	0	0	0	1	1	0	0
ENST00000406875.7	ENSG00000064393.15	HIPK2	ENST00000406875.7|ENSG00000064393.15|OTTHUMG00000157704.3|OTTHUMT00000349430.3|HIPK2-001|HIPK2|15049|protein_coding|	0	0	0	0	0	0	1	1	0	0
ENST00000407249.7	ENSG00000248333.7	CDK11B	ENST00000407249.7|ENSG00000248333.7|OTTHUMG00000078638.6|OTTHUMT00000476673.1|CDK11B-003|CDK11B|2677|protein_coding|	1	0	0	0	0	0	0	1	0	0
ENST00000410560.4	ENSG00000222492.4	AC216130.1	ENST00000410560.4|ENSG00000222492.4|-|-|AC216130.1-201|AC216130.1|91|miRNA|	0	0	0	0	0	0	0	1	0	0
ENST00000412811.1	ENSG00000231873.1	RP11-761N21.1	ENST00000412811.1|ENSG00000231873.1|OTTHUMG00000156011.1|OTTHUMT00000342724.1|RP11-761N21.1-001|RP11-761N21.1|500|lincRNA|	0	0	0	0	0	1	0	0	0	1
ENST00000413698.5	ENSG00000185811.16	IKZF1	ENST00000413698.5|ENSG00000185811.16|OTTHUMG00000155907.1|OTTHUMT00000342248.1|IKZF1-007|IKZF1|1808|protein_coding|	1	1	0	0	0	0	1	1	0	0
ENST00000413798.1	ENSG00000228757.1	AB019438.66	ENST00000413798.1|ENSG00000228757.1|OTTHUMG00000152076.2|OTTHUMT00000325170.2|AB019438.66-001|AB019438.66|141|unprocessed_pseudogene|	0	0	0	0	0	0	0	0	1	0
ENST00000415645.6	ENSG00000185864.16	NPIPB4	ENST00000415645.6|ENSG00000185864.16|OTTHUMG00000163555.5|-|NPIPB4-201|NPIPB4|3606|protein_coding|	0	0	0	1	0	0	0	1	0	0
ENST00000416556.1	ENSG00000226027.1	HLA-S	ENST00000416556.1|ENSG00000226027.1|OTTHUMG00000037253.4|OTTHUMT00000090664.4|HLA-S-001|HLA-S|56|unprocessed_pseudogene|	0	0	0	1	0	0	0	1	0	0
ENST00000417754.1	ENSG00000225145.1	HLA-S	ENST00000417754.1|ENSG00000225145.1|OTTHUMG00000031469.2|OTTHUMT00000077045.2|HLA-S-001|HLA-S|53|unprocessed_pseudogene|	0	0	0	1	0	0	0	1	0	0
ENST00000417964.2	ENSG00000214837.8	LINC01347	ENST00000417964.2|ENSG00000214837.8|OTTHUMG00000039861.5|OTTHUMT00000481524.1|LINC01347-015|LINC01347|355|transcribed_unprocessed_pseudogene|	0	0	1	1	0	0	1	1	0	0
ENST00000418571.2	ENSG00000235389.2	RP11-134K1.3	ENST00000418571.2|ENSG00000235389.2|OTTHUMG00000019542.2|OTTHUMT00000051709.2|RP11-134K1.3-001|RP11-134K1.3|486|sense_intronic|	0	0	0	0	0	1	0	0	0	1
ENST00000418598.1	ENSG00000231795.1	ITCH-IT1	ENST00000418598.1|ENSG00000231795.1|OTTHUMG00000046196.1|OTTHUMT00000106506.1|ITCH-IT1-001|ITCH-IT1|208|sense_intronic|	0	0	0	0	1	0	0	0	1	0
ENST00000419187.6	ENSG00000266028.7	SRGAP2	ENST00000419187.6|ENSG00000266028.7|OTTHUMG00000184381.4|-|SRGAP2-201|SRGAP2|1477|protein_coding|	1	0	0	0	0	0	1	1	0	0
ENST00000419729.1	ENSG00000237559.1	HLA-S	ENST00000419729.1|ENSG00000237559.1|OTTHUMG00000004865.1|OTTHUMT00000035190.2|HLA-S-001|HLA-S|53|unprocessed_pseudogene|	0	0	0	1	0	0	0	1	0	0
ENST00000419983.5	ENSG00000227373.5	RP11-160H22.5	ENST00000419983.5|ENSG00000227373.5|OTTHUMG00000034822.1|OTTHUMT00000084253.1|RP11-160H22.5-004|RP11-160H22.5|535|lincRNA|	0	0	0	0	0	1	0	0	0	1
ENST00000420449.1	ENSG00000228204.2	RP4-724E13.2	ENST00000420449.1|ENSG00000228204.2|OTTHUMG00000155997.3|OTTHUMT00000342680.2|RP4-724E13.2-001|RP4-724E13.2|285|antisense|	0	0	0	1	0	0	0	1	0	0
ENST00000422208.1	ENSG00000229745.1	BPY2DP	ENST00000422208.1|ENSG00000229745.1|OTTHUMG00000041060.1|OTTHUMT00000098486.1|BPY2DP-001|BPY2DP|265|unprocessed_pseudogene|	0	0	0	0	1	0	0	0	1	0
ENST00000425174.1	ENSG00000225851.1	HLA-S	ENST00000425174.1|ENSG00000225851.1|OTTHUMG00000031178.2|OTTHUMT00000076350.2|HLA-S-001|HLA-S|53|unprocessed_pseudogene|	0	0	0	1	0	0	0	1	0	0
ENST00000425248.5	ENSG00000158623.14	COPG2	ENST00000425248.5|ENSG00000158623.14|OTTHUMG00000155364.4|OTTHUMT00000339658.3|COPG2-001|COPG2|3134|protein_coding|	0	0	0	0	0	0	0	1	0	0
ENST00000425275.1	ENSG00000228028.2	AC069257.8	ENST00000425275.1|ENSG00000228028.2|OTTHUMG00000155671.2|OTTHUMT00000341165.2|AC069257.8-001|AC069257.8|422|antisense|	0	0	0	0	0	1	0	0	0	1
ENST00000427557.1	ENSG00000130226.16	DPP6	ENST00000427557.1|ENSG00000130226.16|OTTHUMG00000151511.2|OTTHUMT00000348316.1|DPP6-007|DPP6|2388|protein_coding|	0	1	0	0	0	0	1	1	0	0
ENST00000427920.1	ENSG00000236510.1	AC011284.3	ENST00000427920.1|ENSG00000236510.1|OTTHUMG00000151734.1|OTTHUMT00000323711.1|AC011284.3-001|AC011284.3|856|antisense|	0	0	0	0	0	1	0	0	0	1
ENST00000427989.3	ENSG00000274869.1	RP11-195B21.3	ENST00000427989.3|ENSG00000274869.1|OTTHUMG00000188593.5|OTTHUMT00000477700.4|RP11-195B21.3-001|RP11-195B21.3|1216|transcribed_unprocessed_pseudogene|	0	0	0	1	0	0	0	1	0	0
ENST00000428814.1	ENSG00000231705.1	RP11-432J24.2	ENST00000428814.1|ENSG00000231705.1|OTTHUMG00000019287.1|OTTHUMT00000051076.1|RP11-432J24.2-001|RP11-432J24.2|297|lincRNA|	0	0	0	0	1	0	0	0	1	0
ENST00000428878.6	ENSG00000064393.15	HIPK2	ENST00000428878.6|ENSG00000064393.15|OTTHUMG00000157704.3|OTTHUMT00000349431.2|HIPK2-002|HIPK2|3969|protein_coding|	0	0	0	0	0	0	1	1	0	0
ENST00000429316.1	ENSG00000224585.1	AC103563.5	ENST00000429316.1|ENSG00000224585.1|OTTHUMG00000155152.1|OTTHUMT00000338601.1|AC103563.5-001|AC103563.5|123|unprocessed_pseudogene|	0	0	0	0	1	0	0	0	1	0
ENST00000430165.1	ENSG00000232944.1	RP13-492C18.1	ENST00000430165.1|ENSG00000232944.1|OTTHUMG00000156294.1|OTTHUMT00000343756.1|RP13-492C18.1-001|RP13-492C18.1|186|processed_pseudogene|	0	0	0	0	1	0	0	0	1	0
ENST00000431638.1	ENSG00000226163.1	RP11-167P22.3	ENST00000431638.1|ENSG00000226163.1|OTTHUMG00000018439.1|OTTHUMT00000048589.1|RP11-167P22.3-001|RP11-167P22.3|162|antisense|	0	0	0	0	1	0	0	0	1	0
ENST00000431661.1	ENSG00000215533.8	LINC00189	ENST00000431661.1|ENSG00000215533.8|OTTHUMG00000078876.1|OTTHUMT00000171970.1|LINC00189-002|LINC00189|308|sense_overlapping|	0	0	0	1	0	0	0	1	0	0
ENST00000431663.1	ENSG00000232372.1	GTF2IP20	ENST00000431663.1|ENSG00000232372.1|OTTHUMG00000037471.1|OTTHUMT00000091225.1|GTF2IP20-001|GTF2IP20|360|unprocessed_pseudogene|	0	0	1	1	0	0	1	1	0	0
ENST00000434418.2	ENSG00000231689.2	LINC01090	ENST00000434418.2|ENSG00000231689.2|OTTHUMG00000154285.2|OTTHUMT00000334695.1|LINC01090-001|LINC01090|560|lincRNA|	0	0	0	0	0	1	0	0	0	1
ENST00000435030.5	ENSG00000168280.16	KIF5C	ENST00000435030.5|ENSG00000168280.16|OTTHUMG00000153779.5|OTTHUMT00000332562.3|KIF5C-001|KIF5C|6931|protein_coding|	1	0	0	0	0	0	1	1	0	0
ENST00000437882.2	ENSG00000254016.2	ALG1L10P	ENST00000437882.2|ENSG00000254016.2|OTTHUMG00000168660.1|OTTHUMT00000400508.1|ALG1L10P-001|ALG1L10P|424|unprocessed_pseudogene|	0	0	0	1	0	0	0	1	0	0
ENST00000438033.5	ENSG00000185811.16	IKZF1	ENST00000438033.5|ENSG00000185811.16|OTTHUMG00000155907.1|OTTHUMT00000342244.1|IKZF1-003|IKZF1|1748|protein_coding|	1	1	0	0	0	0	1	1	0	0
ENST00000438487.1	ENSG00000234536.1	GTF2IP13	ENST00000438487.1|ENSG00000234536.1|OTTHUMG00000155422.1|OTTHUMT00000340059.1|GTF2IP13-001|GTF2IP13|386|unprocessed_pseudogene|	0	0	1	1	0	0	1	1	0	0
ENST00000438829.2	ENSG00000224445.2	RP11-413P11.1	ENST00000438829.2|ENSG00000224445.2|OTTHUMG00000010769.2|OTTHUMT00000029680.2|RP11-413P11.1-001|RP11-413P11.1|442|lincRNA|	0	0	0	1	0	0	0	1	0	0
ENST00000439421.2	ENSG00000236303.2	RP11-540N6.1	ENST00000439421.2|ENSG00000236303.2|OTTHUMG00000019273.2|OTTHUMT00000051030.2|RP11-540N6.1-001|RP11-540N6.1|297|lincRNA|	0	0	0	1	0	0	0	1	0	0
ENST00000439435.2	ENSG00000196468.7	FGF16	ENST00000439435.2|ENSG00000196468.7|OTTHUMG00000013133.2|OTTHUMT00000036814.2|FGF16-001|FGF16|1650|protein_coding|	0	0	0	0	0	0	0	1	0	0
ENST00000440712.1	ENSG00000228179.1	HLA-S	ENST00000440712.1|ENSG00000228179.1|OTTHUMG00000149249.1|OTTHUMT00000311090.1|HLA-S-001|HLA-S|53|unprocessed_pseudogene|	0	0	0	1	0	0	0	1	0	0
ENST00000441414.1	ENSG00000236337.1	FMR1-IT1	ENST00000441414.1|ENSG00000236337.1|OTTHUMG00000046184.1|OTTHUMT00000106479.1|FMR1-IT1-001|FMR1-IT1|343|sense_intronic|	0	0	0	0	0	1	0	0	0	1
ENST00000443564.1	ENSG00000232717.1	TRIM51JP	ENST00000443564.1|ENSG00000232717.1|OTTHUMG00000155155.1|OTTHUMT00000338612.1|TRIM51JP-001|TRIM51JP|1320|unprocessed_pseudogene|	0	0	0	1	0	0	0	1	0	0
ENST00000443801.2	ENSG00000225839.2	TRMT2B-AS1	ENST00000443801.2|ENSG00000225839.2|OTTHUMG00000022015.2|OTTHUMT00000057507.2|TRMT2B-AS1-001|TRMT2B-AS1|205|sense_overlapping|	0	0	0	0	1	0	0	0	1	0
ENST00000446671.1	ENSG00000232058.1	AC005772.2	ENST00000446671.1|ENSG00000232058.1|OTTHUMG00000059072.1|OTTHUMT00000130709.1|AC005772.2-001|AC005772.2|976|lincRNA|	0	0	0	1	0	0	0	1	0	0
ENST00000449124.1	ENSG00000236204.5	LINC01376	ENST00000449124.1|ENSG00000236204.5|OTTHUMG00000151766.3|OTTHUMT00000323836.1|LINC01376-003|LINC01376|626|lincRNA|	0	0	0	0	0	1	0	0	0	1
ENST00000449978.2	ENSG00000228955.2	RP11-452J6.2	ENST00000449978.2|ENSG00000228955.2|OTTHUMG00000040133.2|OTTHUMT00000096785.2|RP11-452J6.2-001|RP11-452J6.2|222|processed_pseudogene|	0	0	0	0	1	0	0	0	1	0
ENST00000450040.1	ENSG00000223562.1	RP11-543B16.3	ENST00000450040.1|ENSG00000223562.1|OTTHUMG00000041139.1|OTTHUMT00000098617.1|RP11-543B16.3-001|RP11-543B16.3|116|lincRNA|	0	0	0	0	1	0	0	0	1	0
ENST00000454205.1	ENSG00000236388.1	ITCH-AS1	ENST00000454205.1|ENSG00000236388.1|OTTHUMG00000032298.1|OTTHUMT00000078780.1|ITCH-AS1-001|ITCH-AS1|299|antisense|	0	0	0	0	1	0	0	0	1	0
ENST00000454608.3	ENSG00000161133.16	USP41	ENST00000454608.3|ENSG00000161133.16|OTTHUMG00000151317.4|-|USP41-201|USP41|1077|protein_coding|	0	0	0	1	0	0	0	1	0	0
ENST00000455566.5	ENSG00000175470.18	PPP2R2D	ENST00000455566.5|ENSG00000175470.18|OTTHUMG00000019277.4|OTTHUMT00000051034.3|PPP2R2D-001|PPP2R2D|5738|protein_coding|	0	0	0	0	0	0	0	1	0	0
ENST00000456569.2	ENSG00000011465.16	DCN	ENST00000456569.2|ENSG00000011465.16|OTTHUMG00000169998.5|OTTHUMT00000413718.1|DCN-017|DCN|228|protein_coding|	0	1	0	1	0	0	0	1	0	0
ENST00000458002.6	ENSG00000250061.5	RP11-541P9.3	ENST00000458002.6|ENSG00000250061.5|OTTHUMG00000163326.2|OTTHUMT00000372922.1|RP11-541P9.3-001|RP11-541P9.3|448|antisense|	0	0	0	1	0	0	0	1	0	0
ENST00000461273.1	ENSG00000241493.1	RP11-274B21.5	ENST00000461273.1|ENSG00000241493.1|OTTHUMG00000158272.1|OTTHUMT00000350531.1|RP11-274B21.5-001|RP11-274B21.5|132|processed_pseudogene|	0	0	0	0	1	0	0	0	1	0
ENST00000462543.3	ENSG00000243049.3	RN7SL33P	ENST00000462543.3|ENSG00000243049.3|-|-|RN7SL33P-201|RN7SL33P|342|misc_RNA|	0	0	0	1	0	1	0	1	0	1
ENST00000465127.1	ENSG00000250349.3	RP5-972B16.2	ENST00000465127.1|ENSG00000250349.3|OTTHUMG00000161009.1|OTTHUMT00000363378.1|RP5-972B16.2-001|RP5-972B16.2|954|protein_coding|	0	0	0	1	0	0	0	1	0	0
ENST00000468762.2	ENSG00000241743.2	XACT	ENST00000468762.2|ENSG00000241743.2|OTTHUMG00000022220.3|OTTHUMT00000057955.3|XACT-001|XACT|497|lincRNA|	0	0	0	1	0	0	0	1	0	0
ENST00000479781.5	ENSG00000276850.4	CH17-360D5.2	ENST00000479781.5|ENSG00000276850.4|OTTHUMG00000189091.2|OTTHUMT00000478685.1|CH17-360D5.2-002|CH17-360D5.2|376|lincRNA|	0	0	0	0	0	0	0	1	0	0
ENST00000483013.5	ENSG00000204655.11	MOG	ENST00000483013.5|ENSG00000204655.11|OTTHUMG00000031099.5|OTTHUMT00000354635.1|MOG-015|MOG|279|protein_coding|	0	1	0	0	1	0	0	0	1	0
ENST00000483366.5	ENSG00000169894.17	MUC3A	ENST00000483366.5|ENSG00000169894.17|OTTHUMG00000157038.5|OTTHUMT00000347218.3|MUC3A-004|MUC3A|9944|protein_coding|	0	0	0	0	0	0	0	1	0	0
ENST00000489012.5	ENSG00000241369.5	LINC01192	ENST00000489012.5|ENSG00000241369.5|OTTHUMG00000158021.3|OTTHUMT00000350010.1|LINC01192-002|LINC01192|818|lincRNA|	0	0	0	0	0	1	0	0	0	1
ENST00000496357.4	ENSG00000272670.3	DOC2B	ENST00000496357.4|ENSG00000272670.3|OTTHUMG00000191153.1|OTTHUMT00000486854.1|DOC2B-001|DOC2B|6048|protein_coding|	0	0	0	0	0	0	1	1	0	0
ENST00000497848.2	ENSG00000239823.2	Y_RNA	ENST00000497848.2|ENSG00000239823.2|-|-|Y_RNA.658-201|Y_RNA|106|misc_RNA|	0	0	0	0	0	0	0	0	1	0
ENST00000498002.1	ENSG00000242186.1	AC002523.1	ENST00000498002.1|ENSG00000242186.1|OTTHUMG00000022614.2|OTTHUMT00000058676.2|AC002523.1-001|AC002523.1|260|unprocessed_pseudogene|	0	0	0	0	1	0	0	0	1	0
ENST00000501405.2	ENSG00000247402.2	CTD-2340E1.2	ENST00000501405.2|ENSG00000247402.2|OTTHUMG00000162774.1|OTTHUMT00000370370.1|CTD-2340E1.2-001|CTD-2340E1.2|391|lincRNA|	0	0	0	0	0	1	0	0	0	1
ENST00000502661.1	ENSG00000248551.1	RP11-287F9.2	ENST00000502661.1|ENSG00000248551.1|OTTHUMG00000160762.2|OTTHUMT00000362184.2|RP11-287F9.2-001|RP11-287F9.2|905|lincRNA|	0	0	0	0	0	1	0	0	0	1
ENST00000502934.1	ENSG00000250049.5	RP11-348J24.2	ENST00000502934.1|ENSG00000250049.5|OTTHUMG00000162609.2|OTTHUMT00000369755.1|RP11-348J24.2-002|RP11-348J24.2|2957|lincRNA|	0	0	0	0	0	0	1	1	0	0
ENST00000503813.5	ENSG00000234124.6	CSN1S2AP	ENST00000503813.5|ENSG00000234124.6|OTTHUMG00000160842.1|OTTHUMT00000362614.1|CSN1S2AP-001|CSN1S2AP|84|unitary_pseudogene|	0	0	0	0	1	0	0	0	1	0
ENST00000506819.1	ENSG00000250421.5	RP11-83M16.6	ENST00000506819.1|ENSG00000250421.5|OTTHUMG00000162350.1|OTTHUMT00000368613.1|RP11-83M16.6-002|RP11-83M16.6|589|lincRNA|	0	0	0	0	0	1	0	0	0	1
ENST00000508637.2	ENSG00000248716.2	RP11-362M19.1	ENST00000508637.2|ENSG00000248716.2|OTTHUMG00000161082.2|OTTHUMT00000363684.2|RP11-362M19.1-001|RP11-362M19.1|280|processed_pseudogene|	0	0	0	0	1	0	0	0	1	0
ENST00000510175.5	ENSG00000250312.6	ZNF718	ENST00000510175.5|ENSG00000250312.6|OTTHUMG00000159873.8|OTTHUMT00000357865.5|ZNF718-002|ZNF718|3495|protein_coding|	0	0	0	0	0	0	0	1	0	0
ENST00000510419.1	ENSG00000249942.1	AC142293.3	ENST00000510419.1|ENSG00000249942.1|OTTHUMG00000160824.4|OTTHUMT00000362472.4|AC142293.3-001|AC142293.3|732|antisense|	0	0	0	0	0	0	1	1	0	0
ENST00000510941.5	ENSG00000251339.5	RP11-506N2.1	ENST00000510941.5|ENSG00000251339.5|OTTHUMG00000161226.3|OTTHUMT00000364210.3|RP11-506N2.1-001|RP11-506N2.1|504|lincRNA|	0	0	0	1	0	0	0	1	0	0
ENST00000511165.5	ENSG00000249803.5	RP11-114H21.2	ENST00000511165.5|ENSG00000249803.5|OTTHUMG00000163214.1|OTTHUMT00000372127.1|RP11-114H21.2-002|RP11-114H21.2|676|lincRNA|	0	0	0	0	0	1	0	0	0	1
ENST00000513408.6	ENSG00000253203.6	GUSBP3	ENST00000513408.6|ENSG00000253203.6|OTTHUMG00000162368.5|OTTHUMT00000369094.3|GUSBP3-002|GUSBP3|1296|processed_transcript|	0	0	0	1	0	0	0	1	0	0
ENST00000513443.5	ENSG00000152348.15	ATG10	ENST00000513443.5|ENSG00000152348.15|OTTHUMG00000119041.4|OTTHUMT00000369553.1|ATG10-002|ATG10|978|protein_coding|	0	0	0	0	0	1	0	0	0	1
ENST00000513551.1	ENSG00000251339.5	RP11-506N2.1	ENST00000513551.1|ENSG00000251339.5|OTTHUMG00000161226.3|OTTHUMT00000365877.1|RP11-506N2.1-004|RP11-506N2.1|1061|lincRNA|	0	0	0	1	0	0	0	1	0	0
ENST00000515823.2	ENSG00000279686.1	ECSCR	ENST00000515823.2|ENSG00000279686.1|OTTHUMG00000189234.1|OTTHUMT00000479127.1|ECSCR-001|ECSCR|1002|nonsense_mediated_decay|	0	0	1	1	0	0	1	1	0	0
ENST00000518507.1	ENSG00000253475.1	RP11-110G21.2	ENST00000518507.1|ENSG00000253475.1|OTTHUMG00000164254.1|OTTHUMT00000377947.1|RP11-110G21.2-001|RP11-110G21.2|283|sense_intronic|	0	0	0	0	1	0	0	0	1	0
ENST00000519283.1	ENSG00000253747.1	IGHVII-62-1	ENST00000519283.1|ENSG00000253747.1|OTTHUMG00000151965.2|OTTHUMT00000324611.2|IGHVII-62-1-001|IGHVII-62-1|235|IG_V_pseudogene|	0	0	0	0	0	0	0	0	1	0
ENST00000519320.1	ENSG00000253981.5	ALG1L13P	ENST00000519320.1|ENSG00000253981.5|OTTHUMG00000163708.2|OTTHUMT00000377923.1|ALG1L13P-005|ALG1L13P|584|transcribed_unprocessed_pseudogene|	0	0	0	1	0	0	0	1	0	0
ENST00000523795.3	ENSG00000250210.4	FO082796.1	ENST00000523795.3|ENSG00000250210.4|-|-|FO082796.1-201|FO082796.1|723|protein_coding|	0	0	1	1	0	0	1	1	0	0
ENST00000527819.1	ENSG00000254532.1	RP11-624D11.2	ENST00000527819.1|ENSG00000254532.1|OTTHUMG00000166145.1|OTTHUMT00000388076.1|RP11-624D11.2-001|RP11-624D11.2|429|lincRNA|	0	0	0	1	0	0	0	1	0	0
ENST00000528520.1	ENSG00000255097.1	RP11-5L12.1	ENST00000528520.1|ENSG00000255097.1|OTTHUMG00000165718.1|OTTHUMT00000385938.1|RP11-5L12.1-001|RP11-5L12.1|561|sense_intronic|	0	0	0	0	0	1	0	0	0	1
ENST00000531087.1	ENSG00000254428.1	RP11-110I1.11	ENST00000531087.1|ENSG00000254428.1|OTTHUMG00000166416.1|OTTHUMT00000389663.1|RP11-110I1.11-001|RP11-110I1.11|523|antisense|	0	0	0	0	0	1	0	0	0	1
ENST00000535233.6	ENSG00000159403.15	C1R	ENST00000535233.6|ENSG00000159403.15|OTTHUMG00000168149.5|OTTHUMT00000398447.3|C1R-003|C1R|2211|protein_coding|	0	1	1	1	0	0	1	1	0	0
ENST00000536053.6	ENSG00000159403.15	C1R	ENST00000536053.6|ENSG00000159403.15|OTTHUMG00000168149.5|OTTHUMT00000398446.4|C1R-004|C1R|2347|protein_coding|	0	1	1	1	0	0	1	1	0	0
ENST00000536178.3	ENSG00000160999.10	SH2B2	ENST00000536178.3|ENSG00000160999.10|OTTHUMG00000150652.5|OTTHUMT00000319407.4|SH2B2-001|SH2B2|2113|protein_coding|	0	0	0	0	0	0	0	1	0	0
ENST00000538617.5	ENSG00000150991.14	UBC	ENST00000538617.5|ENSG00000150991.14|OTTHUMG00000044421.3|OTTHUMT00000400179.1|UBC-003|UBC|1303|protein_coding|	1	0	0	1	0	1	0	1	0	1
ENST00000539303.5	ENSG00000255717.6	SNHG1	ENST00000539303.5|ENSG00000255717.6|OTTHUMG00000167743.1|OTTHUMT00000396034.1|SNHG1-023|SNHG1|240|lincRNA|	0	0	0	0	1	0	0	0	1	0
ENST00000539842.5	ENSG00000275896.4	PRSS2	ENST00000539842.5|ENSG00000275896.4|OTTHUMG00000158904.8|OTTHUMT00000352516.7|PRSS2-001|PRSS2|795|protein_coding|	0	1	0	0	0	0	0	0	0	1
ENST00000542285.5	ENSG00000159403.15	C1R	ENST00000542285.5|ENSG00000159403.15|OTTHUMG00000168149.5|OTTHUMT00000398444.3|C1R-001|C1R|2660|protein_coding|	0	1	1	1	0	0	1	1	0	0
ENST00000543611.1	ENSG00000256249.1	RP11-324E6.6	ENST00000543611.1|ENSG00000256249.1|OTTHUMG00000168862.1|OTTHUMT00000401413.1|RP11-324E6.6-001|RP11-324E6.6|1731|lincRNA|	0	0	0	1	0	0	0	1	0	0
ENST00000543635.2	ENSG00000113205.4	PCDHB3	ENST00000543635.2|ENSG00000113205.4|OTTHUMG00000129622.4|-|PCDHB3-201|PCDHB3|2376|protein_coding|	0	0	0	0	0	1	0	0	0	1
ENST00000545941.2	ENSG00000243967.4	NBPF5P	ENST00000545941.2|ENSG00000243967.4|OTTHUMG00000011317.7|OTTHUMT00000031254.6|NBPF5P-001|NBPF5P|1032|transcribed_unprocessed_pseudogene|	0	0	0	1	0	0	0	1	0	0
ENST00000546120.2	ENSG00000150991.14	UBC	ENST00000546120.2|ENSG00000150991.14|OTTHUMG00000044421.3|-|UBC-201|UBC|718|protein_coding|	1	0	0	0	0	1	0	0	0	1
ENST00000548618.2	ENSG00000258002.2	CR759815.1	ENST00000548618.2|ENSG00000258002.2|-|-|CR759815.1-201|CR759815.1|108|protein_coding|	0	0	0	0	1	0	0	0	1	0
ENST00000552607.2	ENSG00000257215.2	CR847794.1	ENST00000552607.2|ENSG00000257215.2|-|-|CR847794.1-201|CR847794.1|108|protein_coding|	0	0	0	0	1	0	0	0	1	0
ENST00000555581.1	ENSG00000266869.1	RP6-114E22.1	ENST00000555581.1|ENSG00000266869.1|OTTHUMG00000179238.1|OTTHUMT00000445384.1|RP6-114E22.1-001|RP6-114E22.1|397|lincRNA|	0	0	0	0	0	1	0	0	0	1
ENST00000558330.5	ENSG00000034053.14	APBA2	ENST00000558330.5|ENSG00000034053.14|OTTHUMG00000129255.3|OTTHUMT00000417244.1|APBA2-002|APBA2|3349|protein_coding|	0	1	0	0	0	0	1	1	0	0
ENST00000558402.5	ENSG00000034053.14	APBA2	ENST00000558402.5|ENSG00000034053.14|OTTHUMG00000129255.3|OTTHUMT00000251362.3|APBA2-001|APBA2|4031|protein_coding|	0	1	0	0	0	0	1	1	0	0
ENST00000561956.1	ENSG00000261783.1	RP11-252K23.2	ENST00000561956.1|ENSG00000261783.1|OTTHUMG00000177128.1|OTTHUMT00000435474.1|RP11-252K23.2-001|RP11-252K23.2|374|sense_intronic|	0	0	1	1	0	1	1	1	0	1
ENST00000561999.1	ENSG00000261064.1	RP11-1000B6.3	ENST00000561999.1|ENSG00000261064.1|OTTHUMG00000175400.1|OTTHUMT00000429855.1|RP11-1000B6.3-001|RP11-1000B6.3|366|lincRNA|	0	0	0	0	0	1	0	0	0	1
ENST00000562094.1	ENSG00000260679.1	RP11-643C9.2	ENST00000562094.1|ENSG00000260679.1|OTTHUMG00000175911.1|OTTHUMT00000431264.1|RP11-643C9.2-001|RP11-643C9.2|299|lincRNA|	0	0	0	0	0	0	0	0	1	0
ENST00000562547.3	ENSG00000260157.3	CH17-53B9.2	ENST00000562547.3|ENSG00000260157.3|OTTHUMG00000175860.1|OTTHUMT00000431193.1|CH17-53B9.2-002|CH17-53B9.2|291|transcribed_unprocessed_pseudogene|	0	0	0	0	0	0	0	0	1	0
ENST00000562793.5	ENSG00000196800.6	SPINK14	ENST00000562793.5|ENSG00000196800.6|OTTHUMG00000129732.2|OTTHUMT00000420835.1|SPINK14-002|SPINK14|157|protein_coding|	0	0	0	0	1	0	0	0	1	0
ENST00000562856.1	ENSG00000261522.5	RP11-407P15.1	ENST00000562856.1|ENSG00000261522.5|OTTHUMG00000175551.1|OTTHUMT00000430471.1|RP11-407P15.1-002|RP11-407P15.1|261|transcribed_unprocessed_pseudogene|	0	0	0	0	0	0	0	0	1	0
ENST00000563054.1	ENSG00000260653.5	RP11-114G11.5	ENST00000563054.1|ENSG00000260653.5|OTTHUMG00000175570.1|OTTHUMT00000430525.1|RP11-114G11.5-002|RP11-114G11.5|2947|lincRNA|	0	0	0	0	0	0	0	0	0	1
ENST00000563550.5	ENSG00000260386.5	LINC01225	ENST00000563550.5|ENSG00000260386.5|OTTHUMG00000174814.2|OTTHUMT00000430452.1|LINC01225-002|LINC01225|1244|unitary_pseudogene|	0	0	0	0	0	0	0	1	0	0
ENST00000563891.1	ENSG00000260595.1	OR4C49P	ENST00000563891.1|ENSG00000260595.1|OTTHUMG00000175624.1|OTTHUMT00000430660.1|OR4C49P-001|OR4C49P|900|unprocessed_pseudogene|	0	0	0	0	0	0	0	0	0	1
ENST00000563924.5	ENSG00000261371.5	PECAM1	ENST00000563924.5|ENSG00000261371.5|OTTHUMG00000175829.2|OTTHUMT00000431142.2|PECAM1-001|PECAM1|6831|protein_coding|	0	0	0	0	0	0	0	1	0	0
ENST00000564717.1	ENSG00000260894.1	CTD-2012K14.4	ENST00000564717.1|ENSG00000260894.1|OTTHUMG00000172865.1|OTTHUMT00000420961.1|CTD-2012K14.4-001|CTD-2012K14.4|207|antisense|	0	0	0	0	1	0	0	0	1	0
ENST00000567053.1	ENSG00000232431.3	RP11-578F21.10	ENST00000567053.1|ENSG00000232431.3|OTTHUMG00000176343.1|OTTHUMT00000431787.1|RP11-578F21.10-001|RP11-578F21.10|138|transcribed_unprocessed_pseudogene|	0	0	0	0	1	0	0	0	1	0
ENST00000567731.1	ENSG00000261766.1	RP11-22P6.2	ENST00000567731.1|ENSG00000261766.1|OTTHUMG00000176591.1|OTTHUMT00000432679.1|RP11-22P6.2-001|RP11-22P6.2|544|antisense|	0	0	0	1	0	0	0	1	0	0
ENST00000568225.2	ENSG00000261150.2	EPPK1	ENST00000568225.2|ENSG00000261150.2|OTTHUMG00000165206.3|-|EPPK1-201|EPPK1|15530|protein_coding|	0	0	0	0	0	0	0	1	0	0
ENST00000568335.3	ENSG00000232258.6	TMEM114	ENST00000568335.3|ENSG00000232258.6|OTTHUMG00000172868.2|OTTHUMT00000479051.1|TMEM114-004|TMEM114|899|protein_coding|	0	1	0	0	0	0	0	1	0	0
ENST00000568934.1	ENSG00000260811.1	OR4C45	ENST00000568934.1|ENSG00000260811.1|OTTHUMG00000175623.1|OTTHUMT00000430659.1|OR4C45-001|OR4C45|921|unprocessed_pseudogene|	0	0	0	0	0	0	0	0	0	1
ENST00000569831.1	ENSG00000260425.1	LA16c-316G12.2	ENST00000569831.1|ENSG00000260425.1|OTTHUMG00000176489.1|OTTHUMT00000432278.1|LA16c-316G12.2-001|LA16c-316G12.2|435|antisense|	0	0	0	0	0	1	0	0	0	1
ENST00000569961.5	ENSG00000260220.5	WI2-2610K16.2	ENST00000569961.5|ENSG00000260220.5|OTTHUMG00000188591.2|OTTHUMT00000477687.2|WI2-2610K16.2-001|WI2-2610K16.2|3158|protein_coding|	0	0	0	0	0	0	0	0	1	0
ENST00000570621.1	ENSG00000262829.1	RP11-673D15.9	ENST00000570621.1|ENSG00000262829.1|OTTHUMG00000178006.1|OTTHUMT00000440207.1|RP11-673D15.9-001|RP11-673D15.9|921|unprocessed_pseudogene|	0	0	0	0	0	0	0	0	0	1
ENST00000570746.5	ENSG00000262466.5	AADACL2-AS1	ENST00000570746.5|ENSG00000262466.5|OTTHUMG00000175316.1|OTTHUMT00000429539.1|AADACL2-AS1-001|AADACL2-AS1|129|antisense|	0	0	0	0	1	0	0	0	1	0
ENST00000571130.1	ENSG00000262191.1	OR9G9	ENST00000571130.1|ENSG00000262191.1|OTTHUMG00000190013.1|OTTHUMT00000483606.1|OR9G9-001|OR9G9|918|protein_coding|	0	0	0	0	0	0	0	0	0	1
ENST00000571573.1	ENSG00000261936.1	RP11-673D15.8	ENST00000571573.1|ENSG00000261936.1|OTTHUMG00000178007.1|OTTHUMT00000440208.1|RP11-673D15.8-001|RP11-673D15.8|930|unprocessed_pseudogene|	0	0	0	0	0	0	0	0	0	1
ENST00000571574.3	ENSG00000266286.2	AC037482.2	ENST00000571574.3|ENSG00000266286.2|OTTHUMG00000182266.1|OTTHUMT00000460308.1|AC037482.2-001|AC037482.2|1157|protein_coding|	0	0	0	0	0	0	0	1	0	0
ENST00000571741.1	ENSG00000262692.1	CTD-3195I5.3	ENST00000571741.1|ENSG00000262692.1|OTTHUMG00000177669.1|OTTHUMT00000438380.1|CTD-3195I5.3-001|CTD-3195I5.3|291|antisense|	0	0	0	0	1	0	0	0	1	0
ENST00000573034.7	ENSG00000266028.7	SRGAP2	ENST00000573034.7|ENSG00000266028.7|OTTHUMG00000184381.4|OTTHUMT00000468677.3|SRGAP2-001|SRGAP2|6301|protein_coding|	1	0	0	0	0	0	0	1	0	0
ENST00000573437.1	ENSG00000262536.1	WI2-1043J20.1	ENST00000573437.1|ENSG00000262536.1|OTTHUMG00000178074.1|OTTHUMT00000440403.1|WI2-1043J20.1-001|WI2-1043J20.1|15|unprocessed_pseudogene|	0	0	0	0	1	0	0	0	1	0
ENST00000574631.2	ENSG00000261968.3	AC037482.3	ENST00000574631.2|ENSG00000261968.3|OTTHUMG00000182267.1|OTTHUMT00000460309.1|AC037482.3-001|AC037482.3|588|protein_coding|	0	0	0	0	0	0	0	1	0	0
ENST00000575056.1	ENSG00000263164.1	RP11-333E1.2	ENST00000575056.1|ENSG00000263164.1|OTTHUMG00000177869.1|OTTHUMT00000439347.1|RP11-333E1.2-001|RP11-333E1.2|498|lincRNA|	0	0	0	0	0	1	0	0	0	1
ENST00000576046.1	ENSG00000263081.1	AC004878.8	ENST00000576046.1|ENSG00000263081.1|OTTHUMG00000162597.2|OTTHUMT00000342384.3|AC004878.8-001|AC004878.8|280|antisense|	0	0	0	0	1	0	0	0	1	0
ENST00000576461.1	ENSG00000262039.1	RP11-81K2.1	ENST00000576461.1|ENSG00000262039.1|OTTHUMG00000177919.1|OTTHUMT00000439714.1|RP11-81K2.1-001|RP11-81K2.1|382|antisense|	0	0	0	0	0	1	0	0	0	1
ENST00000578043.2	ENSG00000264317.2	RN7SL154P	ENST00000578043.2|ENSG00000264317.2|-|-|RN7SL154P-201|RN7SL154P|324|misc_RNA|	0	0	0	1	0	1	0	1	0	1
ENST00000578049.3	ENSG00000265808.3	SEC22B	ENST00000578049.3|ENSG00000265808.3|OTTHUMG00000185008.3|OTTHUMT00000469430.2|SEC22B-001|SEC22B|6922|protein_coding|	0	0	0	0	0	0	0	1	0	0
ENST00000578326.2	ENSG00000264352.2	RN7SL602P	ENST00000578326.2|ENSG00000264352.2|-|-|RN7SL602P-201|RN7SL602P|324|misc_RNA|	0	0	1	1	0	1	1	1	0	1
ENST00000578934.1	ENSG00000265961.1	Y_RNA	ENST00000578934.1|ENSG00000265961.1|-|-|Y_RNA.762-201|Y_RNA|114|misc_RNA|	0	0	0	0	0	0	0	0	1	0
ENST00000578977.1	ENSG00000263609.1	RP11-1109M24.16	ENST00000578977.1|ENSG00000263609.1|OTTHUMG00000179080.2|OTTHUMT00000444731.2|RP11-1109M24.16-001|RP11-1109M24.16|1481|lincRNA|	0	0	0	0	0	1	0	0	0	1
ENST00000579042.2	ENSG00000281369.1	AC093826.1	ENST00000579042.2|ENSG00000281369.1|-|-|AC093826.1-201|AC093826.1|108|pseudogene|	0	0	0	0	1	0	0	0	1	0
ENST00000579254.1	ENSG00000266624.1	MIR1234	ENST00000579254.1|ENSG00000266624.1|-|-|MIR1234-201|MIR1234|80|miRNA|	0	0	0	0	0	0	0	0	1	0
ENST00000579756.2	ENSG00000263360.2	RN7SL134P	ENST00000579756.2|ENSG00000263360.2|-|-|RN7SL134P-201|RN7SL134P|303|misc_RNA|	0	0	0	1	0	1	0	1	0	1
ENST00000581001.1	ENSG00000264675.1	MIR4285	ENST00000581001.1|ENSG00000264675.1|-|-|MIR4285-201|MIR4285|85|miRNA|	0	0	0	0	0	0	0	0	1	0
ENST00000581165.1	ENSG00000265031.1	MIR1273E	ENST00000581165.1|ENSG00000265031.1|-|-|MIR1273E-201|MIR1273E|102|miRNA|	0	0	0	0	0	0	0	0	1	0
ENST00000581254.2	ENSG00000264423.2	RN7SL718P	ENST00000581254.2|ENSG00000264423.2|-|-|RN7SL718P-201|RN7SL718P|303|misc_RNA|	0	0	1	1	0	0	0	1	0	1
ENST00000581685.2	ENSG00000266488.2	RP11-758G22.2	ENST00000581685.2|ENSG00000266488.2|OTTHUMG00000185226.2|OTTHUMT00000469911.2|RP11-758G22.2-001|RP11-758G22.2|1827|unprocessed_pseudogene|	0	0	0	0	0	0	0	1	0	0
ENST00000581946.1	ENSG00000265739.1	RP11-354P11.3	ENST00000581946.1|ENSG00000265739.1|OTTHUMG00000179752.1|OTTHUMT00000447934.1|RP11-354P11.3-001|RP11-354P11.3|546|antisense|	0	0	0	0	0	1	0	0	0	1
ENST00000583033.1	ENSG00000266804.1	AC234063.1	ENST00000583033.1|ENSG00000266804.1|-|-|AC234063.1-201|AC234063.1|98|miRNA|	0	0	0	0	0	0	0	0	1	0
ENST00000583271.5	ENSG00000270231.3	NBPF8	ENST00000583271.5|ENSG00000270231.3|OTTHUMG00000185013.1|OTTHUMT00000469439.1|NBPF8-001|NBPF8|5330|unprocessed_pseudogene|	0	0	0	0	0	0	1	1	0	0
ENST00000583485.2	ENSG00000264092.2	RN7SL474P	ENST00000583485.2|ENSG00000264092.2|-|-|RN7SL474P-201|RN7SL474P|301|misc_RNA|	0	0	0	1	0	1	0	1	0	1
ENST00000584027.8	ENSG00000269713.7	NBPF9	ENST00000584027.8|ENSG00000269713.7|OTTHUMG00000013845.9|-|NBPF9-202|NBPF9|5034|protein_coding|	0	0	0	0	0	0	1	1	0	0
ENST00000584139.1	ENSG00000263388.1	CTC-297N7.10	ENST00000584139.1|ENSG00000263388.1|OTTHUMG00000178526.2|OTTHUMT00000442368.2|CTC-297N7.10-001|CTC-297N7.10|171|antisense|	0	0	0	0	1	0	0	0	1	0
ENST00000584365.1	ENSG00000266664.1	RP11-160E2.21	ENST00000584365.1|ENSG00000266664.1|OTTHUMG00000179790.1|OTTHUMT00000448153.1|RP11-160E2.21-001|RP11-160E2.21|191|sense_intronic|	0	0	0	0	1	0	0	0	1	0
ENST00000584929.6	ENSG00000264006.6	AKR1C8P	ENST00000584929.6|ENSG00000264006.6|OTTHUMG00000184213.1|OTTHUMT00000468327.1|AKR1C8P-002|AKR1C8P|924|transcribed_unprocessed_pseudogene|	0	0	0	0	0	0	0	1	0	0
ENST00000585394.1	ENSG00000267537.1	AC005394.1	ENST00000585394.1|ENSG00000267537.1|OTTHUMG00000180805.1|OTTHUMT00000453078.1|AC005394.1-001|AC005394.1|185|lincRNA|	0	0	0	1	0	0	0	1	0	0
ENST00000587343.1	ENSG00000267703.1	CTD-2013N17.4	ENST00000587343.1|ENSG00000267703.1|OTTHUMG00000182332.1|OTTHUMT00000460565.1|CTD-2013N17.4-001|CTD-2013N17.4|401|antisense|	0	0	0	0	0	1	0	0	0	1
ENST00000590317.3	ENSG00000259823.5	LYPD8	ENST00000590317.3|ENSG00000259823.5|OTTHUMG00000174833.3|OTTHUMT00000430465.2|LYPD8-002|LYPD8|1142|protein_coding|	0	0	0	0	0	0	0	1	0	0
ENST00000591634.1	ENSG00000267625.1	RP11-1094M14.14	ENST00000591634.1|ENSG00000267625.1|OTTHUMG00000179914.1|OTTHUMT00000448930.1|RP11-1094M14.14-001|RP11-1094M14.14|185|lincRNA|	0	0	0	0	1	0	0	0	1	0
ENST00000592183.5	ENSG00000234352.9	AC009264.1	ENST00000592183.5|ENSG00000234352.9|OTTHUMG00000155657.6|OTTHUMT00000459722.1|AC009264.1-004|AC009264.1|534|antisense|	0	0	0	1	0	1	0	1	0	1
ENST00000592926.1	ENSG00000267356.1	RP11-411B10.3	ENST00000592926.1|ENSG00000267356.1|OTTHUMG00000182058.1|OTTHUMT00000459044.1|RP11-411B10.3-001|RP11-411B10.3|517|antisense|	0	0	0	0	0	1	0	0	0	1
ENST00000593588.1	ENSG00000269635.1	AC004257.1	ENST00000593588.1|ENSG00000269635.1|OTTHUMG00000183250.1|OTTHUMT00000465796.1|AC004257.1-001|AC004257.1|277|lincRNA|	0	0	0	0	1	0	0	0	1	0
ENST00000593842.1	ENSG00000269167.1	CR753845.1	ENST00000593842.1|ENSG00000269167.1|-|-|CR753845.1-201|CR753845.1|69|protein_coding|	0	0	0	0	1	0	0	0	1	0
ENST00000597334.1	ENSG00000231205.11	ZNF826P	ENST00000597334.1|ENSG00000231205.11|OTTHUMG00000162773.4|OTTHUMT00000463067.1|ZNF826P-005|ZNF826P|1446|processed_transcript|	0	0	0	0	0	0	0	1	0	0
ENST00000598588.2	ENSG00000274748.1	CH17-53B9.4	ENST00000598588.2|ENSG00000274748.1|OTTHUMG00000175862.1|OTTHUMT00000431195.1|CH17-53B9.4-001|CH17-53B9.4|333|unprocessed_pseudogene|	0	0	0	0	0	0	0	0	0	1
ENST00000599292.1	ENSG00000268203.1	CTD-2396E7.9	ENST00000599292.1|ENSG00000268203.1|OTTHUMG00000181911.1|OTTHUMT00000458274.1|CTD-2396E7.9-001|CTD-2396E7.9|296|antisense|	0	0	0	0	1	0	0	0	1	0
ENST00000599924.1	ENSG00000268746.1	CTD-2571L23.8	ENST00000599924.1|ENSG00000268746.1|OTTHUMG00000183262.1|OTTHUMT00000465845.1|CTD-2571L23.8-001|CTD-2571L23.8|344|lincRNA|	0	0	0	0	0	1	0	0	0	1
ENST00000600335.5	ENSG00000132010.15	ZNF20	ENST00000600335.5|ENSG00000132010.15|OTTHUMG00000156409.2|OTTHUMT00000461059.1|ZNF20-008|ZNF20|560|protein_coding|	0	0	0	0	0	1	0	0	0	1
ENST00000600512.1	ENSG00000269752.1	CTD-3149D2.3	ENST00000600512.1|ENSG00000269752.1|OTTHUMG00000183199.1|OTTHUMT00000465644.1|CTD-3149D2.3-001|CTD-3149D2.3|419|antisense|	0	0	0	0	0	1	0	0	0	1
ENST00000602083.1	ENSG00000269371.1	CTD-2207O23.11	ENST00000602083.1|ENSG00000269371.1|OTTHUMG00000182382.1|OTTHUMT00000460892.1|CTD-2207O23.11-001|CTD-2207O23.11|293|antisense|	0	0	0	0	1	0	0	0	1	0
ENST00000602809.1	ENSG00000270105.1	RP11-326C3.14	ENST00000602809.1|ENSG00000270105.1|OTTHUMG00000184137.1|OTTHUMT00000468089.1|RP11-326C3.14-001|RP11-326C3.14|386|lincRNA|	0	0	0	1	0	0	0	1	0	0
ENST00000603678.1	ENSG00000270894.1	AC015849.13	ENST00000603678.1|ENSG00000270894.1|OTTHUMG00000188392.1|OTTHUMT00000477077.1|AC015849.13-001|AC015849.13|421|sense_overlapping|	0	0	0	0	0	1	0	0	0	1
ENST00000603775.1	ENSG00000271544.1	AC006499.9	ENST00000603775.1|ENSG00000271544.1|OTTHUMG00000184300.1|OTTHUMT00000468575.1|AC006499.9-001|AC006499.9|23|processed_pseudogene|	0	0	0	0	1	0	0	0	1	0
ENST00000605551.2	ENSG00000270872.2	SRGAP2D	ENST00000605551.2|ENSG00000270872.2|OTTHUMG00000188642.1|OTTHUMT00000477800.1|SRGAP2D-001|SRGAP2D|1021|unprocessed_pseudogene|	0	0	0	0	0	0	0	1	0	0
ENST00000605610.5	ENSG00000266028.7	SRGAP2	ENST00000605610.5|ENSG00000266028.7|OTTHUMG00000184381.4|OTTHUMT00000468676.1|SRGAP2-002|SRGAP2|3212|protein_coding|	1	0	0	0	0	0	1	1	0	0
ENST00000608389.1	ENSG00000272710.1	CTD-2026G6.3	ENST00000608389.1|ENSG00000272710.1|OTTHUMG00000185853.1|OTTHUMT00000471516.1|CTD-2026G6.3-001|CTD-2026G6.3|201|lincRNA|	0	0	0	1	0	0	0	1	0	0
ENST00000609714.1	ENSG00000250312.6	ZNF718	ENST00000609714.1|ENSG00000250312.6|OTTHUMG00000159873.8|OTTHUMT00000370821.3|ZNF718-005|ZNF718|2772|protein_coding|	0	0	0	0	0	0	0	1	0	0
ENST00000610234.5	ENSG00000235437.7	LINC01278	ENST00000610234.5|ENSG00000235437.7|OTTHUMG00000021699.2|OTTHUMT00000471673.1|LINC01278-006|LINC01278|555|sense_overlapping|	0	0	0	0	0	1	0	0	0	1
ENST00000610300.4	ENSG00000269713.7	NBPF9	ENST00000610300.4|ENSG00000269713.7|OTTHUMG00000013845.9|OTTHUMT00000479025.1|NBPF9-008|NBPF9|2930|protein_coding|	0	0	0	0	0	0	1	1	0	0
ENST00000610376.1	ENSG00000278307.2	TAS2R19	ENST00000610376.1|ENSG00000278307.2|OTTHUMG00000190782.1|-|TAS2R19-201|TAS2R19|960|protein_coding|	0	0	0	0	0	1	0	0	0	1
ENST00000610416.2	ENSG00000211751.7	TRBV25-1	ENST00000610416.2|ENSG00000211751.7|OTTHUMG00000190609.1|-|TRBV25-1-201|TRBV25-1|1054|TR_C_gene|	0	0	0	0	0	0	0	1	0	0
ENST00000610516.4	ENSG00000227191.6	TRGC2	ENST00000610516.4|ENSG00000227191.6|OTTHUMG00000155215.2|-|TRGC2-201|TRGC2|1579|TR_C_gene|	0	0	0	1	0	0	0	1	0	0
ENST00000610542.1	ENSG00000238009.6	RP11-34P13.7	ENST00000610542.1|ENSG00000238009.6|OTTHUMG00000001096.2|-|RP11-34P13.7-201|RP11-34P13.7|723|lincRNA|	0	0	1	1	0	0	1	1	0	0
ENST00000610547.1	ENSG00000227191.6	TRGC2	ENST00000610547.1|ENSG00000227191.6|OTTHUMG00000155215.2|-|TRGC2-202|TRGC2|1060|TR_C_gene|	0	0	0	1	0	0	0	1	0	0
ENST00000610555.1	ENSG00000241233.2	KRTAP5-8	ENST00000610555.1|ENSG00000241233.2|OTTHUMG00000057571.1|-|KRTAP5-8-201|KRTAP5-8|717|protein_coding|	0	0	0	1	0	0	0	1	0	0
ENST00000610617.1	ENSG00000278702.1	Metazoa_SRP	ENST00000610617.1|ENSG00000278702.1|-|-|Metazoa_SRP.197-201|Metazoa_SRP|323|misc_RNA|	0	0	0	1	0	1	0	1	0	1
ENST00000610725.1	ENSG00000273605.1	RP1-232L24.4	ENST00000610725.1|ENSG00000273605.1|OTTHUMG00000191147.1|OTTHUMT00000436268.1|RP1-232L24.4-001|RP1-232L24.4|890|processed_pseudogene|	0	0	0	0	0	0	0	0	0	1
ENST00000610966.4	ENSG00000166111.9	SVOP	ENST00000610966.4|ENSG00000166111.9|OTTHUMG00000169432.3|OTTHUMT00000403982.3|SVOP-001|SVOP|6813|protein_coding|	0	0	0	0	0	0	0	1	0	0
ENST00000611173.1	ENSG00000148357.16	HMCN2	ENST00000611173.1|ENSG00000148357.16|OTTHUMG00000140096.4|-|HMCN2-201|HMCN2|1920|protein_coding|	0	0	0	0	0	0	0	0	1	0
ENST00000611184.1	ENSG00000274795.1	AC138774.2	ENST00000611184.1|ENSG00000274795.1|-|-|AC138774.2-201|AC138774.2|81|miRNA|	0	0	0	0	0	0	0	0	1	0
ENST00000611193.1	ENSG00000277657.1	KIR2DS3	ENST00000611193.1|ENSG00000277657.1|OTTHUMG00000188741.1|OTTHUMT00000478035.1|KIR2DS3-001|KIR2DS3|991|protein_coding|	0	0	0	0	0	0	0	0	0	1
ENST00000611217.4	ENSG00000278522.4	POTEB3	ENST00000611217.4|ENSG00000278522.4|OTTHUMG00000189222.2|OTTHUMT00000479064.1|POTEB3-001|POTEB3|1813|protein_coding|	0	0	0	0	0	0	0	1	0	0
ENST00000611236.1	ENSG00000244682.7	FCGR2C	ENST00000611236.1|ENSG00000244682.7|OTTHUMG00000074101.4|-|FCGR2C-202|FCGR2C|958|protein_coding|	0	0	0	1	0	0	0	1	0	0
ENST00000611282.1	ENSG00000277112.2	RP11-755J8.1	ENST00000611282.1|ENSG00000277112.2|OTTHUMG00000189351.1|OTTHUMT00000479409.1|RP11-755J8.1-001|RP11-755J8.1|517|processed_transcript|	0	0	0	0	0	0	0	0	0	1
ENST00000611287.4	ENSG00000273136.5	NBPF26	ENST00000611287.4|ENSG00000273136.5|OTTHUMG00000189374.1|-|NBPF26-202|NBPF26|2701|protein_coding|	0	0	0	0	0	0	1	1	0	0
ENST00000611289.1	ENSG00000275704.1	FP565210.1	ENST00000611289.1|ENSG00000275704.1|-|-|FP565210.1-201|FP565210.1|83|miRNA|	0	0	0	0	0	0	0	0	1	0
ENST00000611396.1	ENSG00000277538.1	AC008463.1	ENST00000611396.1|ENSG00000277538.1|-|-|AC008463.1-201|AC008463.1|83|miRNA|	0	0	0	0	0	0	0	0	1	0
ENST00000611496.1	ENSG00000275913.1	AL137861.4	ENST00000611496.1|ENSG00000275913.1|-|-|AL137861.4-201|AL137861.4|83|miRNA|	0	0	0	0	0	0	0	0	1	0
ENST00000611544.1	ENSG00000277903.1	U2	ENST00000611544.1|ENSG00000277903.1|-|-|U2.15-201|U2|191|snRNA|	0	0	0	0	0	0	0	0	1	0
ENST00000611571.4	ENSG00000185499.16	MUC1	ENST00000611571.4|ENSG00000185499.16|OTTHUMG00000035681.4|-|MUC1-205|MUC1|4170|protein_coding|	0	0	0	0	0	0	0	1	0	0
ENST00000611576.1	ENSG00000275357.1	AL137861.2	ENST00000611576.1|ENSG00000275357.1|-|-|AL137861.2-201|AL137861.2|84|miRNA|	0	0	0	0	0	0	0	0	1	0
ENST00000611690.1	ENSG00000278294.1	5_8S_rRNA	ENST00000611690.1|ENSG00000278294.1|-|-|5_8S_rRNA.3-201|5_8S_rRNA|152|rRNA|	0	0	0	0	0	0	0	0	1	0
ENST00000611702.4	ENSG00000273136.5	NBPF26	ENST00000611702.4|ENSG00000273136.5|OTTHUMG00000189374.1|-|NBPF26-203|NBPF26|1831|protein_coding|	0	0	0	0	0	0	0	1	0	0
ENST00000611769.4	ENSG00000274265.4	CH17-189H20.1	ENST00000611769.4|ENSG00000274265.4|OTTHUMG00000188629.1|OTTHUMT00000477763.1|CH17-189H20.1-001|CH17-189H20.1|838|lincRNA|	0	0	0	0	0	0	1	1	0	0
ENST00000611783.1	ENSG00000262594.3	KRTAP9-9	ENST00000611783.1|ENSG00000262594.3|OTTHUMG00000181728.1|-|KRTAP9-9-203|KRTAP9-9|525|protein_coding|	0	0	0	0	0	1	0	0	0	1
ENST00000611978.1	ENSG00000276666.1	AF065393.2	ENST00000611978.1|ENSG00000276666.1|-|-|AF065393.2-201|AF065393.2|125|miRNA|	0	0	0	0	0	0	0	0	1	0
ENST00000611989.1	ENSG00000274236.2	IGHV3-64	ENST00000611989.1|ENSG00000274236.2|OTTHUMG00000191043.1|-|IGHV3-64-202|IGHV3-64|225|IG_V_gene|	0	0	0	0	1	0	0	0	1	0
ENST00000612015.1	ENSG00000171174.13	RBKS	ENST00000612015.1|ENSG00000171174.13|OTTHUMG00000097833.2|-|RBKS-201|RBKS|54|protein_coding|	0	0	0	0	1	0	0	0	1	0
ENST00000612070.1	ENSG00000275435.1	AL137861.3	ENST00000612070.1|ENSG00000275435.1|-|-|AL137861.3-201|AL137861.3|84|miRNA|	0	0	0	0	0	0	0	0	1	0
ENST00000612104.1	ENSG00000277049.1	5S_rRNA	ENST00000612104.1|ENSG00000277049.1|-|-|5S_rRNA.20-201|5S_rRNA|118|rRNA|	0	0	0	0	0	0	0	0	1	0
ENST00000612107.4	ENSG00000211751.7	TRBV25-1	ENST00000612107.4|ENSG00000211751.7|OTTHUMG00000190609.1|-|TRBV25-1-202|TRBV25-1|930|TR_C_gene|	0	0	0	0	0	0	0	0	0	1
ENST00000612199.4	ENSG00000196369.10	SRGAP2B	ENST00000612199.4|ENSG00000196369.10|OTTHUMG00000041442.7|OTTHUMT00000099258.6|SRGAP2B-001|SRGAP2B|7120|protein_coding|	0	0	0	0	0	0	1	1	0	0
ENST00000612231.1	ENSG00000240871.4	KRTAP4-7	ENST00000612231.1|ENSG00000240871.4|OTTHUMG00000133582.1|-|KRTAP4-7-201|KRTAP4-7|690|protein_coding|	0	0	0	0	0	0	0	1	0	0
ENST00000612363.1	ENSG00000233608.3	TWIST2	ENST00000612363.1|ENSG00000233608.3|OTTHUMG00000152836.2|-|TWIST2-201|TWIST2|1404|protein_coding|	0	1	0	0	0	0	1	1	0	0
ENST00000612535.4	ENSG00000271605.5	MILR1	ENST00000612535.4|ENSG00000271605.5|OTTHUMG00000185198.3|OTTHUMT00000477479.1|MILR1-004|MILR1|762|protein_coding|	0	0	0	0	0	0	0	1	0	0
ENST00000612637.1	ENSG00000277710.1	CTD-2314B22.2	ENST00000612637.1|ENSG00000277710.1|OTTHUMG00000170506.3|OTTHUMT00000409409.3|CTD-2314B22.2-001|CTD-2314B22.2|233|processed_pseudogene|	0	0	0	0	1	0	0	0	1	0
ENST00000612640.4	ENSG00000271254.6	AC240274.1	ENST00000612640.4|ENSG00000271254.6|-|-|AC240274.1-202|AC240274.1|2116|protein_coding|	0	0	0	0	0	0	0	1	0	0
ENST00000612658.4	ENSG00000185811.16	IKZF1	ENST00000612658.4|ENSG00000185811.16|OTTHUMG00000155907.1|-|IKZF1-206|IKZF1|962|protein_coding|	1	1	0	0	0	0	1	1	0	0
ENST00000612718.1	ENSG00000224666.3	RP1-50J22.4	ENST00000612718.1|ENSG00000224666.3|OTTHUMG00000014592.1|-|RP1-50J22.4-201|RP1-50J22.4|60|antisense|	0	0	0	0	1	0	0	0	1	0
ENST00000612732.1	ENSG00000276871.1	5_8S_rRNA	ENST00000612732.1|ENSG00000276871.1|-|-|5_8S_rRNA.2-201|5_8S_rRNA|151|rRNA|	0	0	0	0	0	0	0	0	1	0
ENST00000612783.1	ENSG00000274957.1	KIR2DS4	ENST00000612783.1|ENSG00000274957.1|OTTHUMG00000188920.1|OTTHUMT00000478269.1|KIR2DS4-001|KIR2DS4|1630|protein_coding|	0	0	0	0	0	0	0	0	0	1
ENST00000612928.1	ENSG00000275305.1	5S_rRNA	ENST00000612928.1|ENSG00000275305.1|-|-|5S_rRNA.16-201|5S_rRNA|119|rRNA|	0	0	0	0	0	0	0	0	1	0
ENST00000612964.1	ENSG00000276800.1	Metazoa_SRP	ENST00000612964.1|ENSG00000276800.1|-|-|Metazoa_SRP.132-201|Metazoa_SRP|317|misc_RNA|	0	0	0	1	0	1	0	0	0	0
ENST00000613059.4	ENSG00000276299.4	PRAMEF26	ENST00000613059.4|ENSG00000276299.4|OTTHUMG00000189614.1|OTTHUMT00000480126.1|PRAMEF26-001|PRAMEF26|1863|protein_coding|	0	0	0	0	0	0	0	1	0	0
ENST00000613097.1	ENSG00000137869.13	CYP19A1	ENST00000613097.1|ENSG00000137869.13|OTTHUMG00000131747.5|-|CYP19A1-202|CYP19A1|123|protein_coding|	0	1	0	0	1	0	0	0	1	0
ENST00000613119.1	ENSG00000278048.1	U2	ENST00000613119.1|ENSG00000278048.1|-|-|U2.16-201|U2|191|snRNA|	0	0	0	0	0	0	0	0	1	0
ENST00000613187.1	ENSG00000198788.8	MUC2	ENST00000613187.1|ENSG00000198788.8|OTTHUMG00000156800.4|-|MUC2-201|MUC2|4845|pseudogene|	0	0	0	0	0	0	0	1	0	1
ENST00000613240.2	ENSG00000273865.2	HNRNPCL4	ENST00000613240.2|ENSG00000273865.2|OTTHUMG00000189615.1|OTTHUMT00000480127.1|HNRNPCL4-001|HNRNPCL4|1148|protein_coding|	0	0	0	0	0	0	0	0	0	1
ENST00000613305.1	ENSG00000049130.13	KITLG	ENST00000613305.1|ENSG00000049130.13|OTTHUMG00000169888.3|-|KITLG-201|KITLG|135|protein_coding|	0	1	0	1	0	0	0	1	0	0
ENST00000613382.1	ENSG00000276658.1	AC136352.3	ENST00000613382.1|ENSG00000276658.1|-|-|AC136352.3-201|AC136352.3|82|miRNA|	0	0	0	0	0	0	0	0	1	0
ENST00000613471.1	ENSG00000237094.11	RP4-669L17.10	ENST00000613471.1|ENSG00000237094.11|OTTHUMG00000156968.6|-|RP4-669L17.10-201|RP4-669L17.10|723|lincRNA|	0	0	1	1	0	0	1	1	0	0
ENST00000613549.2	ENSG00000272636.3	DOC2B	ENST00000613549.2|ENSG00000272636.3|OTTHUMG00000154415.4|OTTHUMT00000335122.4|DOC2B-001|DOC2B|6048|protein_coding|	0	0	0	0	0	0	1	1	0	0
ENST00000613594.4	ENSG00000281981.1	TRBV25-1	ENST00000613594.4|ENSG00000281981.1|OTTHUMG00000190593.1|-|TRBV25-1-204|TRBV25-1|933|TR_C_gene|	0	0	0	0	0	0	0	0	0	1
ENST00000613595.4	ENSG00000269713.7	NBPF9	ENST00000613595.4|ENSG00000269713.7|OTTHUMG00000013845.9|-|NBPF9-203|NBPF9|4527|protein_coding|	0	0	0	0	0	0	1	1	0	0
ENST00000613654.1	ENSG00000276634.1	KIR2DS4	ENST00000613654.1|ENSG00000276634.1|OTTHUMG00000149820.1|OTTHUMT00000313453.1|KIR2DS4-001|KIR2DS4|1596|protein_coding|	0	0	0	0	0	0	0	0	0	1
ENST00000613720.4	ENSG00000276849.4	TRBC2	ENST00000613720.4|ENSG00000276849.4|OTTHUMG00000190558.1|-|TRBC2-206|TRBC2|933|TR_C_gene|	0	0	0	0	0	0	1	1	0	0
ENST00000613778.1	ENSG00000276596.1	U2	ENST00000613778.1|ENSG00000276596.1|-|-|U2.12-201|U2|191|snRNA|	0	0	0	0	0	0	0	0	1	0
ENST00000613815.1	ENSG00000197919.4	IFNA1	ENST00000613815.1|ENSG00000197919.4|OTTHUMG00000019673.1|-|IFNA1-201|IFNA1|640|protein_coding|	0	0	0	0	0	1	0	0	0	1
ENST00000613903.2	ENSG00000281981.1	TRBV25-1	ENST00000613903.2|ENSG00000281981.1|OTTHUMG00000190593.1|-|TRBV25-1-205|TRBV25-1|1054|TR_C_gene|	0	0	0	0	0	0	0	1	0	0
ENST00000613956.1	ENSG00000278774.1	U2	ENST00000613956.1|ENSG00000278774.1|-|-|U2.20-201|U2|192|snRNA|	0	0	0	0	0	0	0	0	1	0
ENST00000613957.1	ENSG00000263229.3	KRTAP4-11	ENST00000613957.1|ENSG00000263229.3|OTTHUMG00000181718.1|-|KRTAP4-11-201|KRTAP4-11|705|protein_coding|	0	0	0	0	0	1	0	0	0	0
ENST00000613969.4	ENSG00000269713.7	NBPF9	ENST00000613969.4|ENSG00000269713.7|OTTHUMG00000013845.9|-|NBPF9-204|NBPF9|4624|protein_coding|	0	0	0	0	0	0	1	1	0	0
ENST00000613989.3	ENSG00000274821.4	SERPINA2	ENST00000613989.3|ENSG00000274821.4|OTTHUMG00000190243.1|-|SERPINA2-201|SERPINA2|1266|protein_coding|	0	0	0	0	0	0	0	1	0	0
ENST00000614030.1	ENSG00000275649.1	RP11-286O1.1	ENST00000614030.1|ENSG00000275649.1|OTTHUMG00000189109.1|OTTHUMT00000478823.1|RP11-286O1.1-001|RP11-286O1.1|616|lincRNA|	0	0	0	1	0	0	0	1	0	0
ENST00000614087.1	ENSG00000277821.1	AC137488.2	ENST00000614087.1|ENSG00000277821.1|-|-|AC137488.2-201|AC137488.2|73|miRNA|	0	0	0	0	0	0	0	1	1	0
ENST00000614110.1	ENSG00000277761.1	AC136616.2	ENST00000614110.1|ENSG00000277761.1|-|-|AC136616.2-202|AC136616.2|225|protein_coding|	0	0	0	0	1	0	0	0	1	0
ENST00000614114.4	ENSG00000220804.8	AC093642.5	ENST00000614114.4|ENSG00000220804.8|OTTHUMG00000151386.5|OTTHUMT00000322448.3|AC093642.5-006|AC093642.5|957|processed_transcript|	0	0	0	0	0	0	1	1	0	0
ENST00000614128.1	ENSG00000278111.2	TAS2R46	ENST00000614128.1|ENSG00000278111.2|OTTHUMG00000190785.1|-|TAS2R46-202|TAS2R46|1018|protein_coding|	0	1	0	0	0	1	0	0	0	1
ENST00000614148.1	ENSG00000277683.1	AC137488.1	ENST00000614148.1|ENSG00000277683.1|-|-|AC137488.1-201|AC137488.1|115|miRNA|	0	0	0	0	0	0	0	0	1	0
ENST00000614336.4	ENSG00000271254.6	AC240274.1	ENST00000614336.4|ENSG00000271254.6|-|-|AC240274.1-201|AC240274.1|3728|protein_coding|	0	0	0	0	0	0	0	1	0	0
ENST00000614365.1	ENSG00000275877.1	5_8S_rRNA	ENST00000614365.1|ENSG00000275877.1|-|-|5_8S_rRNA.1-201|5_8S_rRNA|152|rRNA|	0	0	0	0	0	0	0	0	1	0
ENST00000614510.4	ENSG00000272419.5	RP11-403I13.8	ENST00000614510.4|ENSG00000272419.5|OTTHUMG00000041632.4|OTTHUMT00000477557.1|RP11-403I13.8-004|RP11-403I13.8|1141|lincRNA|	0	0	0	0	0	0	1	1	0	0
ENST00000614604.4	ENSG00000276760.4	AC136352.4	ENST00000614604.4|ENSG00000276760.4|-|-|AC136352.4-201|AC136352.4|2132|protein_coding|	0	0	0	0	0	0	0	1	0	0
ENST00000614639.1	ENSG00000275731.1	KIR2DS4	ENST00000614639.1|ENSG00000275731.1|OTTHUMG00000188860.2|OTTHUMT00000478180.2|KIR2DS4-001|KIR2DS4|1633|protein_coding|	0	0	0	0	0	0	0	0	0	1
ENST00000614701.4	ENSG00000139304.12	PTPRQ	ENST00000614701.4|ENSG00000139304.12|OTTHUMG00000170171.4|OTTHUMT00000383962.3|PTPRQ-001|PTPRQ|8289|protein_coding|	0	1	0	0	0	0	1	1	0	0
ENST00000614730.1	ENSG00000256188.2	TAS2R30	ENST00000614730.1|ENSG00000256188.2|OTTHUMG00000168562.1|-|TAS2R30-201|TAS2R30|930|protein_coding|	0	0	0	0	0	1	0	0	0	1
ENST00000614839.4	ENSG00000229571.6	PRAMEF26	ENST00000614839.4|ENSG00000229571.6|OTTHUMG00000074741.3|-|PRAMEF26-201|PRAMEF26|1863|protein_coding|	0	0	0	0	0	0	0	1	0	0
ENST00000614914.1	ENSG00000276729.1	Metazoa_SRP	ENST00000614914.1|ENSG00000276729.1|-|-|Metazoa_SRP.126-201|Metazoa_SRP|302|misc_RNA|	0	0	0	0	0	0	0	0	0	1
ENST00000614956.1	ENSG00000273954.1	LINC01194	ENST00000614956.1|ENSG00000273954.1|OTTHUMG00000175370.2|OTTHUMT00000429777.2|LINC01194-003|LINC01194|195|lincRNA|	0	0	0	0	0	0	0	0	1	0
ENST00000615035.1	ENSG00000233412.3	OR5H15	ENST00000615035.1|ENSG00000233412.3|OTTHUMG00000160076.1|-|OR5H15-201|OR5H15|933|protein_coding|	0	0	0	0	0	1	0	0	0	1
ENST00000615145.4	ENSG00000273136.5	NBPF26	ENST00000615145.4|ENSG00000273136.5|OTTHUMG00000189374.1|-|NBPF26-204|NBPF26|2656|protein_coding|	0	0	0	0	0	0	1	1	0	0
ENST00000615194.1	ENSG00000275016.4	RP11-61O11.1	ENST00000615194.1|ENSG00000275016.4|OTTHUMG00000187027.1|OTTHUMT00000474275.1|RP11-61O11.1-005|RP11-61O11.1|489|lincRNA|	0	0	0	0	0	1	0	0	0	1
ENST00000615219.4	ENSG00000273136.5	NBPF26	ENST00000615219.4|ENSG00000273136.5|OTTHUMG00000189374.1|-|NBPF26-205|NBPF26|2051|protein_coding|	0	0	0	0	0	0	0	1	0	0
ENST00000615220.4	ENSG00000271605.5	MILR1	ENST00000615220.4|ENSG00000271605.5|OTTHUMG00000185198.3|OTTHUMT00000477477.1|MILR1-003|MILR1|1196|protein_coding|	0	0	0	0	0	0	0	1	0	0
ENST00000615268.1	ENSG00000278620.2	KRTAP5-4	ENST00000615268.1|ENSG00000278620.2|OTTHUMG00000190087.2|-|KRTAP5-4-204|KRTAP5-4|564|protein_coding|	0	0	0	0	0	1	0	0	0	1
ENST00000615295.1	ENSG00000250765.5	AC138035.1	ENST00000615295.1|ENSG00000250765.5|OTTHUMG00000162985.1|-|AC138035.1-201|AC138035.1|723|lincRNA|	0	0	1	1	0	0	1	1	0	0
ENST00000615408.1	ENSG00000278225.1	AL137861.8	ENST00000615408.1|ENSG00000278225.1|-|-|AL137861.8-201|AL137861.8|84|miRNA|	0	0	0	0	0	0	0	0	1	0
ENST00000615421.4	ENSG00000269713.7	NBPF9	ENST00000615421.4|ENSG00000269713.7|OTTHUMG00000013845.9|OTTHUMT00000038846.6|NBPF9-002|NBPF9|5835|protein_coding|	0	0	0	0	0	0	1	1	0	0
ENST00000615427.1	ENSG00000274862.1	U2	ENST00000615427.1|ENSG00000274862.1|-|-|U2.9-201|U2|191|snRNA|	0	0	0	0	0	0	0	0	1	0
ENST00000615514.1	ENSG00000275983.1	AL137861.5	ENST00000615514.1|ENSG00000275983.1|-|-|AL137861.5-201|AL137861.5|83|miRNA|	0	0	0	0	0	0	0	0	1	0
ENST00000615648.1	ENSG00000261150.2	EPPK1	ENST00000615648.1|ENSG00000261150.2|OTTHUMG00000165206.3|OTTHUMT00000382675.3|EPPK1-001|EPPK1|16002|protein_coding|	0	0	0	0	0	0	0	1	0	0
ENST00000615662.1	ENSG00000277204.1	AC104301.2	ENST00000615662.1|ENSG00000277204.1|-|-|AC104301.2-201|AC104301.2|73|miRNA|	0	0	0	0	0	0	0	0	1	0
ENST00000615774.4	ENSG00000278699.4	POTEB3	ENST00000615774.4|ENSG00000278699.4|OTTHUMG00000190138.1|OTTHUMT00000483955.1|POTEB3-001|POTEB3|1820|protein_coding|	0	0	0	0	0	0	0	1	0	0
ENST00000615797.3	ENSG00000276299.4	PRAMEF26	ENST00000615797.3|ENSG00000276299.4|OTTHUMG00000189614.1|-|PRAMEF26-203|PRAMEF26|1600|protein_coding|	0	0	0	0	0	0	0	1	0	0
ENST00000615833.1	ENSG00000236922.9	LINC01378	ENST00000615833.1|ENSG00000236922.9|OTTHUMG00000059450.8|OTTHUMT00000476007.1|LINC01378-005|LINC01378|158|lincRNA|	0	0	0	1	0	0	0	1	0	0
ENST00000615936.2	ENSG00000276299.4	PRAMEF26	ENST00000615936.2|ENSG00000276299.4|OTTHUMG00000189614.1|-|PRAMEF26-204|PRAMEF26|1840|protein_coding|	0	0	0	0	0	0	0	1	0	0
ENST00000615963.1	ENSG00000263090.4	KRTAP9-2	ENST00000615963.1|ENSG00000263090.4|OTTHUMG00000181720.1|-|KRTAP9-2-203|KRTAP9-2|720|protein_coding|	0	0	0	0	0	1	0	0	0	1
ENST00000616005.1	ENSG00000275032.1	AL137861.1	ENST00000616005.1|ENSG00000275032.1|-|-|AL137861.1-201|AL137861.1|81|miRNA|	0	0	0	0	0	0	0	0	1	0
ENST00000616052.3	ENSG00000274821.4	SERPINA2	ENST00000616052.3|ENSG00000274821.4|OTTHUMG00000190243.1|OTTHUMT00000484346.1|SERPINA2-001|SERPINA2|1485|protein_coding|	0	0	0	0	0	0	0	1	0	0
ENST00000616141.4	ENSG00000223804.5	CH17-472G23.2	ENST00000616141.4|ENSG00000223804.5|OTTHUMG00000185011.1|OTTHUMT00000469433.1|CH17-472G23.2-002|CH17-472G23.2|715|processed_transcript|	0	0	0	0	0	0	1	1	0	0
ENST00000616186.1	ENSG00000277110.2	TRBV6-5	ENST00000616186.1|ENSG00000277110.2|OTTHUMG00000190499.1|-|TRBV6-5-201|TRBV6-5|432|TR_V_gene|	0	0	0	0	0	0	0	0	0	1
ENST00000616252.4	ENSG00000275539.4	LILRA6	ENST00000616252.4|ENSG00000275539.4|OTTHUMG00000149861.3|-|LILRA6-210|LILRA6|1924|protein_coding|	0	0	0	0	0	0	0	1	0	0
ENST00000616285.1	ENSG00000277861.1	AC116618.1	ENST00000616285.1|ENSG00000277861.1|-|-|AC116618.1-201|AC116618.1|102|miRNA|	0	0	0	0	0	0	0	0	1	0
ENST00000616345.1	ENSG00000275616.1	U2	ENST00000616345.1|ENSG00000275616.1|-|-|U2.11-201|U2|191|snRNA|	0	0	0	0	0	0	0	0	1	0
ENST00000616361.1	ENSG00000271254.6	AC240274.1	ENST00000616361.1|ENSG00000271254.6|-|-|AC240274.1-204|AC240274.1|2921|protein_coding|	0	0	0	0	0	0	0	1	0	0
ENST00000616466.4	ENSG00000274148.4	LILRA6	ENST00000616466.4|ENSG00000274148.4|OTTHUMG00000189036.2|-|LILRA6-204|LILRA6|1924|protein_coding|	0	0	0	0	0	0	0	1	0	0
ENST00000616498.4	ENSG00000271605.5	MILR1	ENST00000616498.4|ENSG00000271605.5|OTTHUMG00000185198.3|OTTHUMT00000477480.1|MILR1-006|MILR1|747|protein_coding|	0	0	0	0	0	0	0	1	0	0
ENST00000616535.1	ENSG00000273709.1	U2	ENST00000616535.1|ENSG00000273709.1|-|-|U2.2-201|U2|191|snRNA|	0	0	0	0	0	0	0	0	1	0
ENST00000616559.4	ENSG00000139304.12	PTPRQ	ENST00000616559.4|ENSG00000139304.12|OTTHUMG00000170171.4|-|PTPRQ-201|PTPRQ|8165|protein_coding|	0	1	0	0	0	0	1	1	0	0
ENST00000616585.1	ENSG00000230021.7	RP5-857K21.4	ENST00000616585.1|ENSG00000230021.7|OTTHUMG00000002331.4|-|RP5-857K21.4-201|RP5-857K21.4|723|lincRNA|	0	0	1	1	0	0	1	1	0	0
ENST00000616689.1	ENSG00000272804.2	KRTAP10-7	ENST00000616689.1|ENSG00000272804.2|OTTHUMG00000188307.1|-|KRTAP10-7-201|KRTAP10-7|794|protein_coding|	0	0	0	0	0	0	0	1	0	0
ENST00000616830.1	ENSG00000278625.1	U6	ENST00000616830.1|ENSG00000278625.1|-|-|U6.80-201|U6|106|snRNA|	0	0	0	0	0	0	0	0	1	0
ENST00000616888.1	ENSG00000274589.1	Metazoa_SRP	ENST00000616888.1|ENSG00000274589.1|-|-|Metazoa_SRP.59-201|Metazoa_SRP|305|misc_RNA|	0	0	0	1	0	1	0	1	0	1
ENST00000616961.1	ENSG00000278656.4	KIR3DL2	ENST00000616961.1|ENSG00000278656.4|OTTHUMG00000188958.1|OTTHUMT00000478334.1|KIR3DL2-001|KIR3DL2|1546|protein_coding|	0	0	0	0	0	0	0	1	0	0
ENST00000617070.4	ENSG00000276600.4	RAB7B	ENST00000617070.4|ENSG00000276600.4|OTTHUMG00000189246.1|OTTHUMT00000479162.1|RAB7B-002|RAB7B|2888|protein_coding|	0	0	0	0	0	0	0	0	1	0
ENST00000617084.1	ENSG00000183662.10	FAM19A1	ENST00000617084.1|ENSG00000183662.10|OTTHUMG00000158745.1|-|FAM19A1-201|FAM19A1|159|protein_coding|	0	0	0	1	0	0	0	1	0	0
ENST00000617107.1	ENSG00000276946.1	AC242006.1	ENST00000617107.1|ENSG00000276946.1|-|-|AC242006.1-201|AC242006.1|96|miRNA|	0	0	0	0	0	0	0	0	1	0
ENST00000617188.1	ENSG00000262111.2	TAS2R30	ENST00000617188.1|ENSG00000262111.2|OTTHUMG00000174887.1|-|TAS2R30-202|TAS2R30|927|protein_coding|	0	0	0	0	0	1	0	0	0	1
ENST00000617274.1	ENSG00000274558.1	ABBA01037345.1	ENST00000617274.1|ENSG00000274558.1|-|-|ABBA01037345.1-201|ABBA01037345.1|115|miRNA|	0	0	0	0	0	0	0	0	1	0
ENST00000617460.1	ENSG00000204815.8	TTC25	ENST00000617460.1|ENSG00000204815.8|OTTHUMG00000175837.1|-|TTC25-201|TTC25|2242|protein_coding|	0	0	0	0	0	0	0	1	0	0
ENST00000617469.1	ENSG00000276395.1	KIR2DS4	ENST00000617469.1|ENSG00000276395.1|OTTHUMG00000188875.1|OTTHUMT00000478197.1|KIR2DS4-001|KIR2DS4|1410|protein_coding|	0	0	0	0	0	0	0	0	0	1
ENST00000617520.1	ENSG00000262612.2	TAS2R43	ENST00000617520.1|ENSG00000262612.2|OTTHUMG00000174885.1|-|TAS2R43-202|TAS2R43|930|protein_coding|	0	0	0	0	0	1	0	0	0	1
ENST00000617626.1	ENSG00000278099.1	U1	ENST00000617626.1|ENSG00000278099.1|-|-|U1.41-201|U1|165|snRNA|	0	0	0	0	0	0	0	0	1	0
ENST00000617717.3	ENSG00000211751.7	TRBV25-1	ENST00000617717.3|ENSG00000211751.7|OTTHUMG00000190609.1|-|TRBV25-1-203|TRBV25-1|933|TR_C_gene|	0	0	0	0	0	0	0	0	0	1
ENST00000617785.1	ENSG00000274062.1	U2	ENST00000617785.1|ENSG00000274062.1|-|-|U2.3-201|U2|191|snRNA|	0	0	0	0	0	0	0	0	1	0
ENST00000617787.1	ENSG00000278858.1	AC242006.2	ENST00000617787.1|ENSG00000278858.1|-|-|AC242006.2-201|AC242006.2|82|miRNA|	0	0	0	0	0	0	0	0	1	0
ENST00000617794.2	ENSG00000277585.4	MUC4	ENST00000617794.2|ENSG00000277585.4|OTTHUMG00000189764.4|-|MUC4-205|MUC4|16352|protein_coding|	0	0	0	0	0	0	0	0	0	1
ENST00000617807.2	ENSG00000277058.2	HNRNPCL3	ENST00000617807.2|ENSG00000277058.2|OTTHUMG00000189236.2|OTTHUMT00000479152.2|HNRNPCL3-001|HNRNPCL3|1148|protein_coding|	0	0	0	0	0	0	0	0	0	1
ENST00000617825.1	ENSG00000275353.1	KIR2DS4	ENST00000617825.1|ENSG00000275353.1|OTTHUMG00000188655.1|OTTHUMT00000477826.1|KIR2DS4-001|KIR2DS4|1630|protein_coding|	0	0	0	0	0	0	0	0	0	1
ENST00000617913.4	ENSG00000273136.5	NBPF26	ENST00000617913.4|ENSG00000273136.5|OTTHUMG00000189374.1|-|NBPF26-206|NBPF26|2931|protein_coding|	0	0	0	0	0	0	1	1	0	0
ENST00000617940.1	ENSG00000276291.4	RP11-87H9.2	ENST00000617940.1|ENSG00000276291.4|OTTHUMG00000188611.1|OTTHUMT00000477731.1|RP11-87H9.2-006|RP11-87H9.2|541|transcribed_unprocessed_pseudogene|	0	0	0	0	0	0	0	1	0	1
ENST00000617991.4	ENSG00000276600.4	RAB7B	ENST00000617991.4|ENSG00000276600.4|OTTHUMG00000189246.1|-|RAB7B-201|RAB7B|3014|protein_coding|	0	0	0	0	0	0	0	0	1	0
ENST00000618003.1	ENSG00000275063.1	AC233755.1	ENST00000618003.1|ENSG00000275063.1|-|-|AC233755.1-201|AC233755.1|351|protein_coding|	0	0	0	0	0	0	0	0	0	1
ENST00000618083.1	ENSG00000275987.1	U1	ENST00000618083.1|ENSG00000275987.1|-|-|U1.37-201|U1|144|snRNA|	0	0	0	0	0	0	0	0	1	0
ENST00000618085.1	ENSG00000223648.3	IGHV3-64	ENST00000618085.1|ENSG00000223648.3|OTTHUMG00000151971.1|-|IGHV3-64-201|IGHV3-64|225|IG_V_gene|	0	0	0	0	1	0	0	0	1	0
ENST00000618093.1	ENSG00000105136.19	ZNF419	ENST00000618093.1|ENSG00000105136.19|OTTHUMG00000037073.9|-|ZNF419-202|ZNF419|1281|protein_coding|	0	1	0	1	0	0	0	1	0	0
ENST00000618126.1	ENSG00000275007.1	AC138774.3	ENST00000618126.1|ENSG00000275007.1|-|-|AC138774.3-201|AC138774.3|83|miRNA|	0	0	0	0	0	0	0	1	0	0
ENST00000618155.2	ENSG00000249751.3	ECSCR	ENST00000618155.2|ENSG00000249751.3|OTTHUMG00000163240.3|OTTHUMT00000372342.2|ECSCR-001|ECSCR|1035|protein_coding|	0	0	1	1	0	0	1	1	0	0
ENST00000618161.1	ENSG00000179817.4	MRGPRX4	ENST00000618161.1|ENSG00000179817.4|OTTHUMG00000166442.1|-|MRGPRX4-201|MRGPRX4|969|protein_coding|	0	0	0	0	0	1	0	0	0	1
ENST00000618222.1	ENSG00000170590.8	LINC00266-3	ENST00000618222.1|ENSG00000170590.8|OTTHUMG00000014109.2|-|LINC00266-3-201|LINC00266-3|723|lincRNA|	0	0	1	1	0	0	0	0	0	0
ENST00000618276.1	ENSG00000274993.1	RP11-395B7.2	ENST00000618276.1|ENSG00000274993.1|OTTHUMG00000157043.3|OTTHUMT00000347239.2|RP11-395B7.2-001|RP11-395B7.2|2112|antisense|	0	0	0	0	0	0	0	0	0	1
ENST00000618280.1	ENSG00000275853.1	Metazoa_SRP	ENST00000618280.1|ENSG00000275853.1|-|-|Metazoa_SRP.96-201|Metazoa_SRP|304|misc_RNA|	0	0	0	0	0	0	0	0	0	1
ENST00000618384.1	ENSG00000276939.1	AC104301.1	ENST00000618384.1|ENSG00000276939.1|-|-|AC104301.1-201|AC104301.1|83|miRNA|	0	0	0	0	0	0	0	0	1	0
ENST00000618440.1	ENSG00000274385.1	U6	ENST00000618440.1|ENSG00000274385.1|-|-|U6.34-201|U6|107|snRNA|	0	0	0	0	0	0	0	0	1	0
ENST00000618580.1	ENSG00000278806.1	AF065393.4	ENST00000618580.1|ENSG00000278806.1|-|-|AF065393.4-201|AF065393.4|125|miRNA|	0	0	0	0	0	0	0	0	1	0
ENST00000618602.1	ENSG00000278591.1	U2	ENST00000618602.1|ENSG00000278591.1|-|-|U2.19-201|U2|191|snRNA|	0	0	0	0	0	0	0	0	1	0
ENST00000618664.1	ENSG00000274585.1	RNU2-1	ENST00000618664.1|ENSG00000274585.1|-|-|RNU2-1-201|RNU2-1|191|snRNA|	0	0	0	0	0	0	0	0	1	0
ENST00000618756.4	ENSG00000211896.6	IGHG1	ENST00000618756.4|ENSG00000211896.6|OTTHUMG00000152495.2|-|IGHG1-205|IGHG1|1639|IG_C_gene|	0	1	1	1	0	0	1	1	0	0
ENST00000618832.1	ENSG00000189169.7	KRTAP10-12	ENST00000618832.1|ENSG00000189169.7|OTTHUMG00000057629.1|-|KRTAP10-12-201|KRTAP10-12|282|protein_coding|	0	0	0	0	1	0	0	0	1	0
ENST00000618988.4	ENSG00000229571.6	PRAMEF26	ENST00000618988.4|ENSG00000229571.6|OTTHUMG00000074741.3|-|PRAMEF26-202|PRAMEF26|1600|protein_coding|	0	0	0	0	0	0	0	1	0	0
ENST00000619019.3	ENSG00000224712.10	NPIPA3	ENST00000619019.3|ENSG00000224712.10|OTTHUMG00000166262.5|-|NPIPA3-202|NPIPA3|1088|protein_coding|	0	0	0	1	0	0	0	1	0	0
ENST00000619042.1	ENSG00000172551.10	MUCL1	ENST00000619042.1|ENSG00000172551.10|OTTHUMG00000169815.2|-|MUCL1-201|MUCL1|243|protein_coding|	0	0	0	0	1	0	0	0	1	0
ENST00000619130.1	ENSG00000278782.1	AC136616.3	ENST00000619130.1|ENSG00000278782.1|-|-|AC136616.3-201|AC136616.3|285|protein_coding|	0	0	0	0	1	0	0	0	1	0
ENST00000619133.4	ENSG00000272398.5	CD24	ENST00000619133.4|ENSG00000272398.5|OTTHUMG00000188439.1|OTTHUMT00000477241.1|CD24-001|CD24|2513|protein_coding|	0	0	0	0	0	0	0	1	0	0
ENST00000619225.1	ENSG00000274452.1	U2	ENST00000619225.1|ENSG00000274452.1|-|-|U2.6-201|U2|191|snRNA|	0	0	0	0	0	0	0	0	1	0
ENST00000619286.4	ENSG00000271605.5	MILR1	ENST00000619286.4|ENSG00000271605.5|OTTHUMG00000185198.3|-|MILR1-201|MILR1|1447|protein_coding|	0	0	0	0	0	0	0	1	0	0
ENST00000619355.1	ENSG00000274471.1	RP11-228M15.1	ENST00000619355.1|ENSG00000274471.1|OTTHUMG00000171926.4|OTTHUMT00000415936.4|RP11-228M15.1-001|RP11-228M15.1|883|unprocessed_pseudogene|	0	0	0	0	0	0	1	1	0	0
ENST00000619448.1	ENSG00000234829.3	IFNA17	ENST00000619448.1|ENSG00000234829.3|OTTHUMG00000019667.1|-|IFNA17-201|IFNA17|570|protein_coding|	0	0	0	0	0	1	0	0	0	1
ENST00000619465.1	ENSG00000274432.1	U2	ENST00000619465.1|ENSG00000274432.1|-|-|U2.5-201|U2|191|snRNA|	0	0	0	0	0	0	0	0	1	0
ENST00000619524.1	ENSG00000273757.1	U1	ENST00000619524.1|ENSG00000273757.1|-|-|U1.26-201|U1|165|snRNA|	0	0	0	0	0	0	0	0	1	0
ENST00000619565.1	ENSG00000275509.1	AC241952.1	ENST00000619565.1|ENSG00000275509.1|-|-|AC241952.1-201|AC241952.1|66|miRNA|	0	0	0	0	0	0	0	0	1	0
ENST00000619678.1	ENSG00000196369.10	SRGAP2B	ENST00000619678.1|ENSG00000196369.10|OTTHUMG00000041442.7|-|SRGAP2B-201|SRGAP2B|1477|protein_coding|	0	0	0	0	0	0	1	1	0	0
ENST00000619704.1	ENSG00000277107.1	AC242209.2	ENST00000619704.1|ENSG00000277107.1|-|-|AC242209.2-201|AC242209.2|79|miRNA|	0	0	0	0	0	0	0	0	1	0
ENST00000619748.4	ENSG00000273136.5	NBPF26	ENST00000619748.4|ENSG00000273136.5|OTTHUMG00000189374.1|-|NBPF26-207|NBPF26|2933|protein_coding|	0	0	0	0	0	0	1	1	0	0
ENST00000619756.4	ENSG00000130226.16	DPP6	ENST00000619756.4|ENSG00000130226.16|OTTHUMG00000151511.2|-|DPP6-201|DPP6|1109|protein_coding|	0	1	0	0	0	0	1	1	0	0
ENST00000619771.1	ENSG00000274947.1	KIR2DS4	ENST00000619771.1|ENSG00000274947.1|OTTHUMG00000188767.1|OTTHUMT00000478072.1|KIR2DS4-001|KIR2DS4|1344|protein_coding|	0	0	0	0	0	0	0	0	0	1
ENST00000619870.4	ENSG00000205583.13	STAG3L1	ENST00000619870.4|ENSG00000205583.13|OTTHUMG00000155940.8|OTTHUMT00000437242.2|STAG3L1-012|STAG3L1|1192|processed_transcript|	0	0	0	0	0	0	0	1	0	0
ENST00000619932.4	ENSG00000272150.5	NBPF25P	ENST00000619932.4|ENSG00000272150.5|OTTHUMG00000188662.2|OTTHUMT00000478301.1|NBPF25P-002|NBPF25P|3827|processed_transcript|	0	0	0	0	0	0	0	1	0	0
ENST00000620159.2	ENSG00000275164.3	AC069513.1	ENST00000620159.2|ENSG00000275164.3|OTTHUMG00000189822.1|OTTHUMT00000482602.1|AC069513.1-001|AC069513.1|16226|unprocessed_pseudogene|	0	0	0	0	0	0	0	0	0	1
ENST00000620218.1	ENSG00000273965.1	RP11-378E13.4	ENST00000620218.1|ENSG00000273965.1|OTTHUMG00000188470.1|OTTHUMT00000477359.1|RP11-378E13.4-001|RP11-378E13.4|293|antisense|	0	0	0	0	1	0	0	0	1	0
ENST00000620265.1	ENSG00000278457.1	5S_rRNA	ENST00000620265.1|ENSG00000278457.1|-|-|5S_rRNA.27-201|5S_rRNA|119|rRNA|	0	0	0	0	0	0	0	0	1	0
ENST00000620268.1	ENSG00000275219.1	U2	ENST00000620268.1|ENSG00000275219.1|-|-|U2.10-201|U2|191|snRNA|	0	0	0	0	0	0	0	0	1	0
ENST00000620355.1	ENSG00000277244.1	FP236383.11	ENST00000620355.1|ENSG00000277244.1|-|-|FP236383.11-201|FP236383.11|60|miRNA|	0	0	0	0	0	0	0	0	1	0
ENST00000620475.1	ENSG00000276453.1	ABBA01037349.1	ENST00000620475.1|ENSG00000276453.1|-|-|ABBA01037349.1-201|ABBA01037349.1|80|miRNA|	0	0	0	0	0	0	0	0	1	0
ENST00000620669.1	ENSG00000274406.1	KIR2DS4	ENST00000620669.1|ENSG00000274406.1|OTTHUMG00000188728.1|OTTHUMT00000478022.1|KIR2DS4-001|KIR2DS4|1344|protein_coding|	0	0	0	0	0	0	0	0	0	1
ENST00000620677.1	ENSG00000274152.1	AF065393.1	ENST00000620677.1|ENSG00000274152.1|-|-|AF065393.1-201|AF065393.1|127|miRNA|	0	0	0	0	0	0	0	0	1	0
ENST00000620719.1	ENSG00000274658.1	TBC1D3J	ENST00000620719.1|ENSG00000274658.1|OTTHUMG00000188429.1|OTTHUMT00000477180.1|TBC1D3J-001|TBC1D3J|1426|unprocessed_pseudogene|	0	0	0	0	0	0	0	0	0	1
ENST00000620725.1	ENSG00000188120.14	DAZ1	ENST00000620725.1|ENSG00000188120.14|OTTHUMG00000044053.1|-|DAZ1-204|DAZ1|1891|protein_coding|	0	1	0	1	0	0	0	1	0	0
ENST00000620748.1	ENSG00000277605.1	Metazoa_SRP	ENST00000620748.1|ENSG00000277605.1|-|-|Metazoa_SRP.163-201|Metazoa_SRP|331|misc_RNA|	0	0	0	1	0	1	0	1	0	1
ENST00000620799.1	ENSG00000275395.4	FCGBP	ENST00000620799.1|ENSG00000275395.4|OTTHUMG00000182580.4|-|FCGBP-201|FCGBP|4926|protein_coding|	0	0	0	0	0	0	0	1	0	0
ENST00000620810.1	ENSG00000276760.4	AC136352.4	ENST00000620810.1|ENSG00000276760.4|-|-|AC136352.4-202|AC136352.4|1988|protein_coding|	0	0	0	0	0	0	0	1	0	0
ENST00000620840.1	ENSG00000273646.1	AC136352.1	ENST00000620840.1|ENSG00000273646.1|-|-|AC136352.1-201|AC136352.1|82|miRNA|	0	0	0	0	0	0	0	0	1	0
ENST00000620974.1	ENSG00000275477.1	ABBA01037346.1	ENST00000620974.1|ENSG00000275477.1|-|-|ABBA01037346.1-201|ABBA01037346.1|73|miRNA|	0	0	0	0	0	0	0	0	1	0
ENST00000620980.1	ENSG00000277917.1	AF065393.3	ENST00000620980.1|ENSG00000277917.1|-|-|AF065393.3-201|AF065393.3|132|miRNA|	0	0	0	0	0	0	0	0	1	0
ENST00000621074.4	ENSG00000269713.7	NBPF9	ENST00000621074.4|ENSG00000269713.7|OTTHUMG00000013845.9|-|NBPF9-205|NBPF9|4302|protein_coding|	0	0	0	0	0	0	1	1	0	0
ENST00000621226.2	ENSG00000215182.8	MUC5AC	ENST00000621226.2|ENSG00000215182.8|OTTHUMG00000154270.5|OTTHUMT00000382518.3|MUC5AC-001|MUC5AC|17448|protein_coding|	0	0	0	0	0	0	0	1	0	0
ENST00000621259.4	ENSG00000280267.3	PRAMEF26	ENST00000621259.4|ENSG00000280267.3|OTTHUMG00000009499.3|-|PRAMEF26-205|PRAMEF26|1840|protein_coding|	0	0	0	0	0	0	0	1	0	0
ENST00000621315.1	ENSG00000275840.1	Metazoa_SRP	ENST00000621315.1|ENSG00000275840.1|-|-|Metazoa_SRP.95-201|Metazoa_SRP|318|misc_RNA|	0	0	0	1	0	1	0	1	0	1
ENST00000621386.1	ENSG00000276322.1	FP236383.6	ENST00000621386.1|ENSG00000276322.1|-|-|FP236383.6-201|FP236383.6|178|miRNA|	0	0	0	0	0	0	0	0	1	0
ENST00000621436.1	ENSG00000276154.1	KIR2DS4	ENST00000621436.1|ENSG00000276154.1|OTTHUMG00000188900.1|OTTHUMT00000478247.1|KIR2DS4-001|KIR2DS4|1630|protein_coding|	0	0	0	0	0	0	0	0	0	1
ENST00000621564.1	ENSG00000223804.5	CH17-472G23.2	ENST00000621564.1|ENSG00000223804.5|OTTHUMG00000185011.1|OTTHUMT00000469436.1|CH17-472G23.2-003|CH17-472G23.2|178|transcribed_unprocessed_pseudogene|	0	0	0	0	1	0	0	0	1	0
ENST00000621577.1	ENSG00000278335.1	AC092854.1	ENST00000621577.1|ENSG00000278335.1|-|-|AC092854.1-201|AC092854.1|81|miRNA|	0	0	0	0	0	0	0	0	1	0
ENST00000621645.4	ENSG00000269713.7	NBPF9	ENST00000621645.4|ENSG00000269713.7|OTTHUMG00000013845.9|OTTHUMT00000477629.2|NBPF9-007|NBPF9|5632|protein_coding|	0	0	0	0	0	0	1	1	0	0
ENST00000621744.4	ENSG00000271383.6	NBPF19	ENST00000621744.4|ENSG00000271383.6|OTTHUMG00000013900.11|OTTHUMT00000039082.4|NBPF19-001|NBPF19|14425|protein_coding|	0	0	0	0	0	0	0	1	0	0
ENST00000621798.4	ENSG00000272419.5	RP11-403I13.8	ENST00000621798.4|ENSG00000272419.5|OTTHUMG00000041632.4|OTTHUMT00000477554.1|RP11-403I13.8-002|RP11-403I13.8|1015|lincRNA|	0	0	0	0	0	0	0	1	0	0
ENST00000621862.1	ENSG00000277165.1	AC242528.1	ENST00000621862.1|ENSG00000277165.1|-|-|AC242528.1-201|AC242528.1|300|processed_pseudogene|	0	0	0	0	0	0	0	0	1	0
ENST00000622172.2	ENSG00000275887.4	KIR3DP1	ENST00000622172.2|ENSG00000275887.4|OTTHUMG00000188962.1|OTTHUMT00000478342.1|KIR3DP1-002|KIR3DP1|1294|processed_transcript|	0	0	0	0	0	0	0	1	0	0
ENST00000622285.1	ENSG00000274210.1	U1	ENST00000622285.1|ENSG00000274210.1|-|-|U1.30-201|U1|165|snRNA|	0	0	0	0	0	0	0	0	1	0
ENST00000622315.1	ENSG00000272398.5	CD24	ENST00000622315.1|ENSG00000272398.5|OTTHUMG00000188439.1|OTTHUMT00000477245.1|CD24-007|CD24|825|protein_coding|	0	0	0	0	0	0	0	1	0	0
ENST00000622325.2	ENSG00000274699.3	TAS2R30	ENST00000622325.2|ENSG00000274699.3|OTTHUMG00000190788.1|-|TAS2R30-203|TAS2R30|927|protein_coding|	0	0	0	0	0	1	0	0	0	1
ENST00000622341.1	ENSG00000188171.14	ZNF626	ENST00000622341.1|ENSG00000188171.14|OTTHUMG00000179733.2|-|ZNF626-202|ZNF626|2163|protein_coding|	0	0	0	0	0	1	0	0	0	1
ENST00000622505.1	ENSG00000273628.1	RP11-756A22.7	ENST00000622505.1|ENSG00000273628.1|OTTHUMG00000187794.1|OTTHUMT00000475564.1|RP11-756A22.7-001|RP11-756A22.7|329|unprocessed_pseudogene|	0	0	0	1	0	0	0	1	0	0
ENST00000622547.1	ENSG00000273539.2	IGHV3-73	ENST00000622547.1|ENSG00000273539.2|OTTHUMG00000191061.1|-|IGHV3-73-201|IGHV3-73|249|IG_V_gene|	0	0	0	0	1	0	0	0	1	0
ENST00000622626.1	ENSG00000254468.2	RP11-304M2.6	ENST00000622626.1|ENSG00000254468.2|OTTHUMG00000165812.1|-|RP11-304M2.6-201|RP11-304M2.6|723|lincRNA|	0	0	1	1	0	0	1	1	0	0
ENST00000622738.1	ENSG00000277573.1	AC245407.1	ENST00000622738.1|ENSG00000277573.1|-|-|AC245407.1-201|AC245407.1|81|miRNA|	0	0	0	0	0	0	0	0	1	0
ENST00000623021.1	ENSG00000279857.1	AC063956.1	ENST00000623021.1|ENSG00000279857.1|-|-|AC063956.1-201|AC063956.1|51|protein_coding|	0	0	0	0	1	0	0	0	1	0
ENST00000623025.1	ENSG00000279374.1	AL596220.1	ENST00000623025.1|ENSG00000279374.1|-|-|AL596220.1-201|AL596220.1|135|protein_coding|	0	0	0	0	1	0	0	0	1	0
ENST00000623045.1	ENSG00000279054.1	AL445183.1	ENST00000623045.1|ENSG00000279054.1|-|-|AL445183.1-201|AL445183.1|48|protein_coding|	0	0	0	1	0	0	0	1	0	0
ENST00000623055.1	ENSG00000278888.1	AC090154.1	ENST00000623055.1|ENSG00000278888.1|-|-|AC090154.1-201|AC090154.1|171|protein_coding|	0	0	0	0	1	0	0	0	1	0
ENST00000623065.1	ENSG00000280404.1	AC005086.3	ENST00000623065.1|ENSG00000280404.1|-|-|AC005086.3-201|AC005086.3|213|pseudogene|	0	0	0	0	1	0	0	0	1	0
ENST00000623068.1	ENSG00000279546.1	AL645922.1	ENST00000623068.1|ENSG00000279546.1|-|-|AL645922.1-201|AL645922.1|69|protein_coding|	0	0	0	0	1	0	0	0	1	0
ENST00000623071.1	ENSG00000279352.1	RP11-411B10.7	ENST00000623071.1|ENSG00000279352.1|OTTHUMG00000182054.1|OTTHUMT00000459028.1|RP11-411B10.7-001|RP11-411B10.7|864|TEC|	0	0	0	0	0	1	0	0	0	1
ENST00000623231.1	ENSG00000279335.1	AC009977.1	ENST00000623231.1|ENSG00000279335.1|-|-|AC009977.1-201|AC009977.1|99|protein_coding|	0	0	0	1	0	0	0	1	0	0
ENST00000623408.1	ENSG00000279211.1	RP11-570J4.2	ENST00000623408.1|ENSG00000279211.1|OTTHUMG00000189456.1|OTTHUMT00000479724.1|RP11-570J4.2-001|RP11-570J4.2|392|processed_pseudogene|	0	0	0	0	0	0	0	0	0	1
ENST00000623473.1	ENSG00000280363.1	CU104787.1	ENST00000623473.1|ENSG00000280363.1|-|-|CU104787.1-201|CU104787.1|54|protein_coding|	0	0	0	0	1	0	0	0	1	0
ENST00000623475.1	ENSG00000280151.1	FKSG59	ENST00000623475.1|ENSG00000280151.1|-|-|FKSG59-201|FKSG59|375|protein_coding|	0	0	0	0	0	1	0	0	0	1
ENST00000623496.1	ENSG00000279560.1	AC007326.1	ENST00000623496.1|ENSG00000279560.1|-|-|AC007326.1-201|AC007326.1|228|protein_coding|	0	0	0	1	0	0	0	1	0	0
ENST00000623587.1	ENSG00000279784.1	CH507-39O4.1	ENST00000623587.1|ENSG00000279784.1|OTTHUMG00000189385.1|OTTHUMT00000479535.1|CH507-39O4.1-001|CH507-39O4.1|307|lincRNA|	0	0	0	0	0	0	0	0	0	1
ENST00000623592.1	ENSG00000280286.1	ABC14-1080714F14.1	ENST00000623592.1|ENSG00000280286.1|OTTHUMG00000189283.1|OTTHUMT00000479279.1|ABC14-1080714F14.1-001|ABC14-1080714F14.1|341|unprocessed_pseudogene|	0	0	0	0	0	0	0	0	0	1
ENST00000623715.1	ENSG00000277112.2	RP11-755J8.1	ENST00000623715.1|ENSG00000277112.2|OTTHUMG00000189351.1|OTTHUMT00000479408.1|RP11-755J8.1-002|RP11-755J8.1|2470|transcribed_unprocessed_pseudogene|	0	0	0	0	0	0	1	1	0	1
ENST00000623753.1	ENSG00000279669.1	RP11-717F1.1	ENST00000623753.1|ENSG00000279669.1|OTTHUMG00000189363.1|OTTHUMT00000479450.1|RP11-717F1.1-001|RP11-717F1.1|388|lincRNA|	0	0	0	0	0	0	0	0	0	1
ENST00000623778.1	ENSG00000280329.1	AC026449.1	ENST00000623778.1|ENSG00000280329.1|-|-|AC026449.1-201|AC026449.1|63|protein_coding|	0	0	0	1	0	0	0	1	0	0
ENST00000623893.1	ENSG00000276600.4	RAB7B	ENST00000623893.1|ENSG00000276600.4|OTTHUMG00000189246.1|OTTHUMT00000479164.1|RAB7B-001|RAB7B|1851|protein_coding|	0	0	0	0	0	0	0	0	1	0
ENST00000623926.1	ENSG00000278951.1	AC007557.5	ENST00000623926.1|ENSG00000278951.1|-|-|AC007557.5-201|AC007557.5|78|protein_coding|	0	0	0	0	1	0	0	0	1	0
ENST00000624080.1	ENSG00000236830.6	CBR3-AS1	ENST00000624080.1|ENSG00000236830.6|OTTHUMG00000086607.4|OTTHUMT00000479224.1|CBR3-AS1-020|CBR3-AS1|822|antisense|	0	0	0	0	0	1	0	0	0	1
ENST00000624089.1	ENSG00000278936.1	CH17-140K24.7	ENST00000624089.1|ENSG00000278936.1|OTTHUMG00000189127.1|OTTHUMT00000478885.1|CH17-140K24.7-002|CH17-140K24.7|484|antisense|	0	0	0	0	0	0	0	1	0	0
ENST00000624208.1	ENSG00000279916.1	AC010655.1	ENST00000624208.1|ENSG00000279916.1|-|-|AC010655.1-201|AC010655.1|66|protein_coding|	0	0	0	0	1	0	0	0	1	0
ENST00000624245.1	ENSG00000278939.1	AC242988.1	ENST00000624245.1|ENSG00000278939.1|-|-|AC242988.1-201|AC242988.1|75|protein_coding|	0	0	0	0	0	1	0	0	0	1
ENST00000624277.3	ENSG00000260220.5	WI2-2610K16.2	ENST00000624277.3|ENSG00000260220.5|OTTHUMG00000188591.2|OTTHUMT00000479272.1|WI2-2610K16.2-004|WI2-2610K16.2|3918|protein_coding|	0	0	0	0	0	0	0	0	1	0
ENST00000624302.1	ENSG00000280221.1	AC008686.1	ENST00000624302.1|ENSG00000280221.1|-|-|AC008686.1-201|AC008686.1|384|protein_coding|	0	0	0	1	0	1	1	1	0	1
ENST00000624320.1	ENSG00000280050.1	AC008622.1	ENST00000624320.1|ENSG00000280050.1|-|-|AC008622.1-201|AC008622.1|48|protein_coding|	0	0	0	0	1	0	0	0	1	0
ENST00000624334.1	ENSG00000279229.1	AC019206.1	ENST00000624334.1|ENSG00000279229.1|-|-|AC019206.1-201|AC019206.1|192|protein_coding|	0	0	0	0	1	0	0	0	1	0
ENST00000624359.1	ENSG00000279109.1	AC008641.1	ENST00000624359.1|ENSG00000279109.1|-|-|AC008641.1-201|AC008641.1|69|protein_coding|	0	0	0	0	1	0	0	0	1	0
ENST00000624422.1	ENSG00000278883.1	AL591806.1	ENST00000624422.1|ENSG00000278883.1|-|-|AL591806.1-201|AL591806.1|150|protein_coding|	0	0	0	1	0	0	0	1	0	0
ENST00000624522.1	ENSG00000279745.1	AL365202.1	ENST00000624522.1|ENSG00000279745.1|-|-|AL365202.1-201|AL365202.1|294|protein_coding|	0	0	0	0	1	0	0	0	1	0
ENST00000624552.3	ENSG00000148357.16	HMCN2	ENST00000624552.3|ENSG00000148357.16|OTTHUMG00000140096.4|OTTHUMT00000276096.3|HMCN2-001|HMCN2|15610|protein_coding|	0	0	0	0	0	0	1	1	0	0
ENST00000624572.1	ENSG00000279487.1	AC234582.1	ENST00000624572.1|ENSG00000279487.1|-|-|AC234582.1-201|AC234582.1|303|protein_coding|	0	0	0	0	0	0	0	0	0	1
ENST00000624735.1	ENSG00000279457.3	FO538757.2	ENST00000624735.1|ENSG00000279457.3|-|-|FO538757.2-203|FO538757.2|1604|protein_coding|	0	0	1	1	0	0	0	1	0	0
ENST00000624736.1	ENSG00000279864.1	RP11-570J4.1	ENST00000624736.1|ENSG00000279864.1|OTTHUMG00000189451.1|OTTHUMT00000479715.1|RP11-570J4.1-001|RP11-570J4.1|186|processed_pseudogene|	0	0	0	0	0	0	0	0	1	0
ENST00000624784.1	ENSG00000279612.1	CTD-2541J13.2	ENST00000624784.1|ENSG00000279612.1|OTTHUMG00000191325.1|OTTHUMT00000440346.1|CTD-2541J13.2-001|CTD-2541J13.2|1056|TEC|	0	0	0	0	0	0	0	1	0	1
ENST00000624832.1	ENSG00000279183.1	FKSG66	ENST00000624832.1|ENSG00000279183.1|-|-|FKSG66-201|FKSG66|375|protein_coding|	0	0	0	0	0	1	0	0	0	1
ENST00000624839.1	ENSG00000279084.1	AC022405.1	ENST00000624839.1|ENSG00000279084.1|-|-|AC022405.1-201|AC022405.1|375|protein_coding|	0	0	0	0	0	1	0	0	0	1
ENST00000624855.1	ENSG00000279230.1	AL158839.1	ENST00000624855.1|ENSG00000279230.1|-|-|AL158839.1-201|AL158839.1|57|protein_coding|	0	0	0	0	1	0	0	0	1	0
ENST00000624857.1	ENSG00000279892.1	AL356135.1	ENST00000624857.1|ENSG00000279892.1|-|-|AL356135.1-201|AL356135.1|33|protein_coding|	0	0	0	0	1	0	0	0	1	0
ENST00000624860.1	ENSG00000279768.1	AC008914.1	ENST00000624860.1|ENSG00000279768.1|-|-|AC008914.1-201|AC008914.1|72|protein_coding|	0	0	0	1	0	0	0	1	0	0
ENST00000624873.3	ENSG00000266028.7	SRGAP2	ENST00000624873.3|ENSG00000266028.7|OTTHUMG00000184381.4|OTTHUMT00000479026.1|SRGAP2-016|SRGAP2|4705|protein_coding|	1	0	0	0	0	0	0	1	0	0
ENST00000624937.1	ENSG00000278955.1	CH507-210P18.4	ENST00000624937.1|ENSG00000278955.1|OTTHUMG00000189398.1|OTTHUMT00000479568.1|CH507-210P18.4-001|CH507-210P18.4|553|lincRNA|	0	0	0	0	0	0	1	1	0	0
ENST00000625006.1	ENSG00000279808.1	AC018512.1	ENST00000625006.1|ENSG00000279808.1|-|-|AC018512.1-201|AC018512.1|48|protein_coding|	0	0	0	0	1	0	0	0	1	0
ENST00000625046.1	ENSG00000279363.1	AL162426.1	ENST00000625046.1|ENSG00000279363.1|-|-|AL162426.1-201|AL162426.1|54|protein_coding|	0	0	0	0	1	0	0	0	1	0
ENST00000625088.1	ENSG00000279849.1	FKSG70	ENST00000625088.1|ENSG00000279849.1|-|-|FKSG70-201|FKSG70|375|protein_coding|	0	0	0	0	0	0	0	0	0	1
ENST00000625131.1	ENSG00000279336.1	AL353662.2	ENST00000625131.1|ENSG00000279336.1|-|-|AL353662.2-201|AL353662.2|237|pseudogene|	0	0	0	0	1	0	0	0	1	0
ENST00000625207.1	ENSG00000280473.1	AC100821.2	ENST00000625207.1|ENSG00000280473.1|-|-|AC100821.2-201|AC100821.2|60|protein_coding|	0	0	0	0	1	0	0	0	1	0
ENST00000625266.1	ENSG00000280684.1	AC069499.1	ENST00000625266.1|ENSG00000280684.1|-|-|AC069499.1-201|AC069499.1|48|protein_coding|	0	0	0	0	1	0	0	0	1	0
ENST00000625271.1	ENSG00000281889.1	AC073072.1	ENST00000625271.1|ENSG00000281889.1|-|-|AC073072.1-201|AC073072.1|123|protein_coding|	0	0	0	1	0	1	0	1	0	1
ENST00000625289.1	ENSG00000259522.2	RP11-468E2.2	ENST00000625289.1|ENSG00000259522.2|OTTHUMG00000170680.2|-|RP11-468E2.2-201|RP11-468E2.2|297|protein_coding|	0	0	0	0	1	0	0	0	1	0
ENST00000625538.1	ENSG00000281637.1	Metazoa_SRP	ENST00000625538.1|ENSG00000281637.1|-|-|Metazoa_SRP.264-201|Metazoa_SRP|306|misc_RNA|	0	0	0	1	0	1	0	1	0	1
ENST00000625635.1	ENSG00000134333.13	LDHA	ENST00000625635.1|ENSG00000134333.13|OTTHUMG00000167721.2|-|LDHA-202|LDHA|141|protein_coding|	0	1	0	0	1	0	0	0	1	0
ENST00000625748.1	ENSG00000280514.1	AC142525.1	ENST00000625748.1|ENSG00000280514.1|-|-|AC142525.1-201|AC142525.1|75|protein_coding|	0	0	0	1	0	0	0	1	0	0
ENST00000625770.2	ENSG00000167515.10	TRAPPC2L	ENST00000625770.2|ENSG00000167515.10|OTTHUMG00000137861.6|-|TRAPPC2L-201|TRAPPC2L|281|protein_coding|	0	0	0	0	1	0	0	0	1	0
ENST00000625901.1	ENSG00000281267.1	AC110602.1	ENST00000625901.1|ENSG00000281267.1|-|-|AC110602.1-201|AC110602.1|108|protein_coding|	0	0	0	0	1	0	0	0	1	0
ENST00000625906.1	ENSG00000281269.1	AC068724.2	ENST00000625906.1|ENSG00000281269.1|-|-|AC068724.2-201|AC068724.2|87|pseudogene|	0	0	0	0	1	0	0	0	1	0
ENST00000625984.1	ENSG00000108395.13	TRIM37	ENST00000625984.1|ENSG00000108395.13|OTTHUMG00000179360.1|-|TRIM37-201|TRIM37|204|protein_coding|	0	1	0	0	1	0	0	0	1	0
ENST00000626074.1	ENSG00000281038.1	OR8U1	ENST00000626074.1|ENSG00000281038.1|OTTHUMG00000189931.1|OTTHUMT00000483417.1|OR8U1-001|OR8U1|930|protein_coding|	0	0	0	0	0	0	0	0	0	1
ENST00000626282.1	ENSG00000281273.1	AC087651.1	ENST00000626282.1|ENSG00000281273.1|-|-|AC087651.1-201|AC087651.1|63|protein_coding|	0	0	0	0	1	0	0	0	1	0
ENST00000626298.1	ENSG00000253457.2	SMIM18	ENST00000626298.1|ENSG00000253457.2|OTTHUMG00000163839.1|-|SMIM18-201|SMIM18|114|protein_coding|	0	0	0	0	1	0	0	0	1	0
ENST00000626331.1	ENSG00000281472.1	AC005042.1	ENST00000626331.1|ENSG00000281472.1|-|-|AC005042.1-201|AC005042.1|39|protein_coding|	0	0	0	1	0	0	0	1	0	0
ENST00000626421.1	ENSG00000281420.1	AP001052.1	ENST00000626421.1|ENSG00000281420.1|-|-|AP001052.1-201|AP001052.1|99|pseudogene|	0	0	0	0	1	0	0	0	1	0
ENST00000626454.1	ENSG00000113643.8	RARS	ENST00000626454.1|ENSG00000113643.8|OTTHUMG00000130411.3|-|RARS-201|RARS|177|protein_coding|	0	0	0	1	0	0	0	1	0	0
ENST00000626763.1	ENSG00000281760.1	AL138751.1	ENST00000626763.1|ENSG00000281760.1|-|-|AL138751.1-201|AL138751.1|33|protein_coding|	0	0	0	0	1	0	0	0	1	0
ENST00000626806.1	ENSG00000281855.1	AC105009.1	ENST00000626806.1|ENSG00000281855.1|-|-|AC105009.1-201|AC105009.1|60|protein_coding|	0	0	0	0	1	0	0	0	1	0
ENST00000626818.1	ENSG00000177963.12	RIC8A	ENST00000626818.1|ENSG00000177963.12|OTTHUMG00000119069.5|-|RIC8A-201|RIC8A|159|protein_coding|	0	0	0	0	1	0	0	0	1	0
ENST00000626819.1	ENSG00000281137.1	AC074033.1	ENST00000626819.1|ENSG00000281137.1|-|-|AC074033.1-201|AC074033.1|45|protein_coding|	0	0	0	1	0	0	0	1	0	0
ENST00000626848.2	ENSG00000280686.2	LINC01237	ENST00000626848.2|ENSG00000280686.2|OTTHUMG00000189672.1|OTTHUMT00000480256.1|LINC01237-002|LINC01237|329|lincRNA|	0	0	0	0	0	1	0	0	0	1
ENST00000626876.1	ENSG00000281527.1	AC087350.1	ENST00000626876.1|ENSG00000281527.1|-|-|AC087350.1-201|AC087350.1|96|protein_coding|	0	0	0	0	1	0	0	0	1	0
ENST00000626887.1	ENSG00000281227.1	AC011380.1	ENST00000626887.1|ENSG00000281227.1|-|-|AC011380.1-201|AC011380.1|48|protein_coding|	0	0	0	0	1	0	0	0	1	0
ENST00000626947.2	ENSG00000277585.4	MUC4	ENST00000626947.2|ENSG00000277585.4|OTTHUMG00000189764.4|OTTHUMT00000481805.2|MUC4-001|MUC4|23128|protein_coding|	0	0	0	0	0	0	0	1	0	1
ENST00000627087.1	ENSG00000280582.1	RP11-110I1.11	ENST00000627087.1|ENSG00000280582.1|OTTHUMG00000166416.1|OTTHUMT00000389663.1|RP11-110I1.11-001|RP11-110I1.11|523|antisense|	0	0	0	0	0	1	0	0	0	1
ENST00000627176.1	ENSG00000262315.3	OR8U8	ENST00000627176.1|ENSG00000262315.3|OTTHUMG00000189938.1|OTTHUMT00000483443.1|OR8U8-001|OR8U8|960|protein_coding|	0	0	0	0	0	0	0	0	0	1
ENST00000627177.1	ENSG00000178252.17	WDR6	ENST00000627177.1|ENSG00000178252.17|OTTHUMG00000133546.11|-|WDR6-203|WDR6|207|protein_coding|	0	0	0	0	1	0	0	0	1	0
ENST00000627186.1	ENSG00000280544.1	AC107081.1	ENST00000627186.1|ENSG00000280544.1|-|-|AC107081.1-201|AC107081.1|129|protein_coding|	0	0	0	1	0	0	0	1	0	0
ENST00000627245.1	ENSG00000127054.18	CPSF3L	ENST00000627245.1|ENSG00000127054.18|OTTHUMG00000003330.12|-|CPSF3L-205|CPSF3L|138|protein_coding|	0	0	0	1	0	0	0	1	0	0
ENST00000627251.1	ENSG00000281629.1	Metazoa_SRP	ENST00000627251.1|ENSG00000281629.1|-|-|Metazoa_SRP.263-201|Metazoa_SRP|317|misc_RNA|	0	0	0	1	0	1	0	1	0	1
ENST00000627256.2	ENSG00000277518.3	MUC6	ENST00000627256.2|ENSG00000277518.3|OTTHUMG00000189858.1|OTTHUMT00000483201.1|MUC6-001|MUC6|14829|polymorphic_pseudogene|	0	0	0	0	0	0	0	1	0	0
ENST00000627463.1	ENSG00000281781.1	AP001888.1	ENST00000627463.1|ENSG00000281781.1|-|-|AP001888.1-201|AP001888.1|42|protein_coding|	0	0	0	0	1	0	0	0	1	0
ENST00000627593.1	ENSG00000221938.3	OR2A14	ENST00000627593.1|ENSG00000221938.3|OTTHUMG00000158003.1|-|OR2A14-201|OR2A14|924|protein_coding|	0	0	0	0	0	1	0	0	0	1
ENST00000627631.1	ENSG00000137802.13	MAPKBP1	ENST00000627631.1|ENSG00000137802.13|OTTHUMG00000160227.1|-|MAPKBP1-201|MAPKBP1|210|protein_coding|	0	0	0	0	1	0	0	0	1	0
ENST00000627754.1	ENSG00000281071.1	AC016734.1	ENST00000627754.1|ENSG00000281071.1|-|-|AC016734.1-201|AC016734.1|45|protein_coding|	0	0	0	0	1	0	0	0	1	0
ENST00000627924.1	ENSG00000281620.1	AC006445.1	ENST00000627924.1|ENSG00000281620.1|-|-|AC006445.1-201|AC006445.1|120|protein_coding|	0	0	0	0	1	0	0	0	1	0
ENST00000627926.2	ENSG00000277281.3	MUC6	ENST00000627926.2|ENSG00000277281.3|OTTHUMG00000189864.1|OTTHUMT00000483243.1|MUC6-001|MUC6|12809|polymorphic_pseudogene|	0	0	0	0	0	0	0	1	0	0
ENST00000628087.1	ENSG00000281079.1	AC055866.1	ENST00000628087.1|ENSG00000281079.1|-|-|AC055866.1-201|AC055866.1|33|protein_coding|	0	0	0	0	1	0	0	0	1	0
ENST00000628409.1	ENSG00000281072.1	AC073476.1	ENST00000628409.1|ENSG00000281072.1|-|-|AC073476.1-201|AC073476.1|72|pseudogene|	0	0	0	0	1	0	0	0	1	0
ENST00000628460.1	ENSG00000281446.1	AL139333.1	ENST00000628460.1|ENSG00000281446.1|-|-|AL139333.1-201|AL139333.1|54|protein_coding|	0	0	0	0	1	0	0	0	1	0
ENST00000628571.1	ENSG00000280550.1	AC131263.1	ENST00000628571.1|ENSG00000280550.1|-|-|AC131263.1-201|AC131263.1|171|protein_coding|	0	0	0	0	1	0	0	0	1	0
ENST00000628622.1	ENSG00000280587.1	LINC01348	ENST00000628622.1|ENSG00000280587.1|OTTHUMG00000189738.1|OTTHUMT00000481617.1|LINC01348-001|LINC01348|3262|lincRNA|	0	0	0	0	0	0	0	1	0	1
ENST00000628664.1	ENSG00000281126.1	AC091180.1	ENST00000628664.1|ENSG00000281126.1|-|-|AC091180.1-201|AC091180.1|51|protein_coding|	0	0	0	0	1	0	0	0	1	0
ENST00000628705.1	ENSG00000281123.1	FCGBP	ENST00000628705.1|ENSG00000281123.1|-|-|FCGBP-202|FCGBP|16389|protein_coding|	0	0	0	1	0	0	0	0	0	0
ENST00000628802.1	ENSG00000281656.1	AC073130.2	ENST00000628802.1|ENSG00000281656.1|-|-|AC073130.2-201|AC073130.2|48|protein_coding|	0	0	0	0	1	0	0	0	1	0
ENST00000628882.1	ENSG00000281523.1	AC104581.1	ENST00000628882.1|ENSG00000281523.1|-|-|AC104581.1-201|AC104581.1|48|protein_coding|	0	0	0	0	1	0	0	0	1	0
ENST00000628958.1	ENSG00000281112.1	AL355480.2	ENST00000628958.1|ENSG00000281112.1|-|-|AL355480.2-201|AL355480.2|84|pseudogene|	0	0	0	0	1	0	0	0	1	0
ENST00000628998.1	ENSG00000280817.1	AC018902.1	ENST00000628998.1|ENSG00000280817.1|-|-|AC018902.1-201|AC018902.1|45|protein_coding|	0	0	0	0	1	0	0	0	1	0
ENST00000629041.1	ENSG00000280836.1	AL355480.1	ENST00000629041.1|ENSG00000280836.1|-|-|AL355480.1-201|AL355480.1|99|pseudogene|	0	0	0	0	1	0	0	0	1	0
ENST00000629043.1	ENSG00000280575.1	AC024361.1	ENST00000629043.1|ENSG00000280575.1|-|-|AC024361.1-201|AC024361.1|54|protein_coding|	0	0	0	1	0	0	0	1	0	0
ENST00000629085.1	ENSG00000280675.1	AC092384.1	ENST00000629085.1|ENSG00000280675.1|-|-|AC092384.1-201|AC092384.1|48|protein_coding|	0	0	0	0	1	0	0	0	1	0
ENST00000629101.1	ENSG00000281584.1	AC024060.1	ENST00000629101.1|ENSG00000281584.1|-|-|AC024060.1-201|AC024060.1|63|protein_coding|	0	0	0	1	0	0	0	1	0	0
ENST00000629139.1	ENSG00000280917.1	AC018696.1	ENST00000629139.1|ENSG00000280917.1|OTTHUMG00000189795.1|OTTHUMT00000482356.1|AC018696.1-001|AC018696.1|224|processed_pseudogene|	0	0	0	0	0	0	0	0	1	0
ENST00000629223.1	ENSG00000159692.15	CTBP1	ENST00000629223.1|ENSG00000159692.15|OTTHUMG00000089259.8|-|CTBP1-201|CTBP1|210|protein_coding|	0	0	0	0	1	0	0	0	1	0
ENST00000629453.1	ENSG00000281042.1	AC013286.1	ENST00000629453.1|ENSG00000281042.1|-|-|AC013286.1-201|AC013286.1|48|protein_coding|	0	0	0	0	1	0	0	0	1	0
ENST00000629531.1	ENSG00000276410.2	HIST1H2BB	ENST00000629531.1|ENSG00000276410.2|OTTHUMG00000014421.1|-|HIST1H2BB-201|HIST1H2BB|431|protein_coding|	0	0	0	0	0	1	0	0	0	1
ENST00000629658.1	ENSG00000280542.1	AP000432.4	ENST00000629658.1|ENSG00000280542.1|OTTHUMG00000190269.1|OTTHUMT00000484434.1|AP000432.4-001|AP000432.4|849|lincRNA|	0	0	0	0	0	0	0	1	0	0
ENST00000629761.2	ENSG00000281614.2	INPP5D	ENST00000629761.2|ENSG00000281614.2|OTTHUMG00000133688.6|OTTHUMT00000257930.3|INPP5D-001|INPP5D|5274|protein_coding|	1	1	0	0	0	0	1	1	0	0
ENST00000629848.1	ENSG00000281346.1	Metazoa_SRP	ENST00000629848.1|ENSG00000281346.1|-|-|Metazoa_SRP.246-201|Metazoa_SRP|321|misc_RNA|	0	0	1	1	0	1	0	1	0	1
ENST00000629882.2	ENSG00000277585.4	MUC4	ENST00000629882.2|ENSG00000277585.4|OTTHUMG00000189764.4|OTTHUMT00000481810.2|MUC4-007|MUC4|22291|protein_coding|	0	0	0	0	0	0	0	1	0	1
ENST00000629937.1	ENSG00000281674.1	AC087651.2	ENST00000629937.1|ENSG00000281674.1|-|-|AC087651.2-201|AC087651.2|63|protein_coding|	0	0	0	0	1	0	0	0	1	0
ENST00000630128.1	ENSG00000281133.1	AL355480.3	ENST00000630128.1|ENSG00000281133.1|-|-|AL355480.3-201|AL355480.3|96|pseudogene|	0	0	0	0	1	0	0	0	1	0
ENST00000630143.1	ENSG00000261221.3	ZNF865	ENST00000630143.1|ENSG00000261221.3|OTTHUMG00000177108.1|-|ZNF865-201|ZNF865|99|protein_coding|	0	0	0	0	1	0	0	0	1	0
ENST00000630149.1	ENSG00000221914.8	PPP2R2A	ENST00000630149.1|ENSG00000221914.8|OTTHUMG00000163850.11|-|PPP2R2A-201|PPP2R2A|99|protein_coding|	0	0	0	0	1	0	0	0	1	0
ENST00000630162.1	ENSG00000280944.1	CH17-132F21.5	ENST00000630162.1|ENSG00000280944.1|OTTHUMG00000189794.1|OTTHUMT00000482355.1|CH17-132F21.5-001|CH17-132F21.5|1961|lincRNA|	0	0	0	0	0	0	1	1	0	1
ENST00000630473.1	ENSG00000281228.1	AL132640.1	ENST00000630473.1|ENSG00000281228.1|-|-|AL132640.1-201|AL132640.1|177|pseudogene|	0	0	0	0	1	0	0	0	1	0
ENST00000630519.1	ENSG00000278620.2	KRTAP5-4	ENST00000630519.1|ENSG00000278620.2|OTTHUMG00000190087.2|OTTHUMT00000483872.1|KRTAP5-4-001|KRTAP5-4|1359|protein_coding|	0	0	0	0	0	0	0	1	0	0
ENST00000630568.1	ENSG00000280694.1	Metazoa_SRP	ENST00000630568.1|ENSG00000280694.1|-|-|Metazoa_SRP.213-201|Metazoa_SRP|316|misc_RNA|	0	0	0	1	0	1	0	1	0	1
ENST00000630587.1	ENSG00000281870.1	RP4-591L5.1	ENST00000630587.1|ENSG00000281870.1|OTTHUMG00000189624.1|OTTHUMT00000480136.1|RP4-591L5.1-001|RP4-591L5.1|574|lincRNA|	0	0	0	0	0	0	0	0	1	0
ENST00000630957.1	ENSG00000123427.15	METTL21B	ENST00000630957.1|ENSG00000123427.15|OTTHUMG00000170459.1|-|METTL21B-201|METTL21B|30|protein_coding|	0	0	0	0	1	0	0	0	1	0
ENST00000631153.1	ENSG00000281676.1	AC012363.2	ENST00000631153.1|ENSG00000281676.1|-|-|AC012363.2-201|AC012363.2|42|protein_coding|	0	0	0	0	1	0	0	0	1	0
ENST00000631158.1	ENSG00000281416.1	RP5-1135M2.1	ENST00000631158.1|ENSG00000281416.1|OTTHUMG00000189627.1|OTTHUMT00000480139.1|RP5-1135M2.1-001|RP5-1135M2.1|546|lincRNA|	0	0	0	0	0	0	0	1	0	0
ENST00000631176.1	ENSG00000281746.1	Clostridiales-1	ENST00000631176.1|ENSG00000281746.1|-|-|Clostridiales-1.16-201|Clostridiales-1|114|sRNA|	0	0	0	0	0	0	0	0	1	0
ENST00000631665.1	ENSG00000282648.1	RP11-578F21.10	ENST00000631665.1|ENSG00000282648.1|OTTHUMG00000191383.1|OTTHUMT00000487738.1|RP11-578F21.10-001|RP11-578F21.10|138|transcribed_unprocessed_pseudogene|	0	0	0	0	1	0	0	0	1	0
ENST00000631748.1	ENSG00000282790.1	RP11-378E13.4	ENST00000631748.1|ENSG00000282790.1|OTTHUMG00000191248.1|OTTHUMT00000487257.1|RP11-378E13.4-001|RP11-378E13.4|293|antisense|	0	0	0	0	1	0	0	0	1	0
ENST00000631823.1	ENSG00000282792.1	PRAMEF19	ENST00000631823.1|ENSG00000282792.1|-|-|PRAMEF19-201|PRAMEF19|2125|protein_coding|	1	0	0	1	0	0	0	0	0	0
ENST00000631925.1	ENSG00000282505.1	TRBV3-2	ENST00000631925.1|ENSG00000282505.1|OTTHUMG00000190573.1|OTTHUMT00000485260.1|TRBV3-2-001|TRBV3-2|344|TR_V_pseudogene|	0	0	0	0	0	0	0	0	0	1
ENST00000632062.1	ENSG00000282656.1	TBC1D3J	ENST00000632062.1|ENSG00000282656.1|OTTHUMG00000191223.1|OTTHUMT00000487137.1|TBC1D3J-001|TBC1D3J|1614|unprocessed_pseudogene|	0	0	0	0	0	0	0	0	0	1
ENST00000632091.1	ENSG00000282083.1	AC015849.13	ENST00000632091.1|ENSG00000282083.1|OTTHUMG00000191187.1|OTTHUMT00000487038.1|AC015849.13-001|AC015849.13|421|sense_overlapping|	0	0	0	0	0	1	0	0	0	1
ENST00000632112.1	ENSG00000282049.1	PRSS2	ENST00000632112.1|ENSG00000282049.1|OTTHUMG00000190547.2|OTTHUMT00000485207.2|PRSS2-001|PRSS2|795|protein_coding|	0	1	0	0	0	0	0	0	0	1
ENST00000632197.1	ENSG00000282537.1	TAS2R43	ENST00000632197.1|ENSG00000282537.1|OTTHUMG00000190787.1|OTTHUMT00000486018.1|TAS2R43-001|TAS2R43|930|protein_coding|	0	0	0	0	0	0	0	0	0	1
ENST00000632223.1	ENSG00000282715.1	ANKRD20A9P	ENST00000632223.1|ENSG00000282715.1|OTTHUMG00000190821.1|OTTHUMT00000486091.1|ANKRD20A9P-001|ANKRD20A9P|3621|unprocessed_pseudogene|	0	0	0	0	0	0	1	1	0	0
ENST00000632325.1	ENSG00000282099.1	IGHVII-62-1	ENST00000632325.1|ENSG00000282099.1|OTTHUMG00000191041.1|OTTHUMT00000486542.1|IGHVII-62-1-001|IGHVII-62-1|235|IG_V_pseudogene|	0	0	0	0	0	0	0	0	1	0
ENST00000632346.1	ENSG00000282024.1	RP3-467D16.3	ENST00000632346.1|ENSG00000282024.1|OTTHUMG00000191399.1|OTTHUMT00000487787.1|RP3-467D16.3-002|RP3-467D16.3|1026|antisense|	0	0	0	0	0	1	0	0	0	1
ENST00000632370.1	ENSG00000282024.1	RP3-467D16.3	ENST00000632370.1|ENSG00000282024.1|OTTHUMG00000191399.1|OTTHUMT00000487788.1|RP3-467D16.3-001|RP3-467D16.3|886|antisense|	0	0	0	0	0	1	0	0	0	1
ENST00000632398.1	ENSG00000282565.1	TRY7	ENST00000632398.1|ENSG00000282565.1|OTTHUMG00000190585.1|OTTHUMT00000485281.1|TRY7-001|TRY7|711|unprocessed_pseudogene|	0	0	0	0	0	0	0	0	0	1
ENST00000632469.1	ENSG00000282533.1	AB019438.66	ENST00000632469.1|ENSG00000282533.1|OTTHUMG00000191004.1|OTTHUMT00000486491.1|AB019438.66-001|AB019438.66|141|unprocessed_pseudogene|	0	0	0	0	0	0	0	0	1	0
ENST00000632549.1	ENSG00000281987.1	PRAMEF25	ENST00000632549.1|ENSG00000281987.1|OTTHUMG00000009499.3|-|PRAMEF25-201|PRAMEF25|1840|protein_coding|	0	0	0	0	0	0	0	1	0	0
ENST00000632559.1	ENSG00000282566.1	PRAMEF26	ENST00000632559.1|ENSG00000282566.1|OTTHUMG00000074741.3|-|PRAMEF26-206|PRAMEF26|1863|protein_coding|	0	0	0	0	0	0	0	1	0	0
ENST00000632805.1	ENSG00000275896.4	PRSS2	ENST00000632805.1|ENSG00000275896.4|OTTHUMG00000158904.8|-|PRSS2-201|PRSS2|807|protein_coding|	0	1	0	0	0	0	0	0	0	1
ENST00000632998.1	ENSG00000275896.4	PRSS2	ENST00000632998.1|ENSG00000275896.4|OTTHUMG00000158904.8|-|PRSS2-202|PRSS2|817|protein_coding|	0	1	0	0	0	0	0	0	0	1
ENST00000633114.1	ENSG00000275896.4	PRSS2	ENST00000633114.1|ENSG00000275896.4|OTTHUMG00000158904.8|-|PRSS2-203|PRSS2|806|protein_coding|	0	1	0	0	0	0	0	0	0	1
ENST00000633363.1	ENSG00000282508.1	LINC01002	ENST00000633363.1|ENSG00000282508.1|OTTHUMG00000188608.4|OTTHUMT00000475121.1|LINC01002-027|LINC01002|541|lincRNA|	0	0	0	1	0	0	0	1	0	1
ENST00000633610.1	ENSG00000282522.1	PKD1P1	ENST00000633610.1|ENSG00000282522.1|OTTHUMG00000191077.2|OTTHUMT00000487729.1|PKD1P1-002|PKD1P1|10508|transcribed_unprocessed_pseudogene|	0	0	0	0	0	0	0	1	0	0
ENST00000633680.1	ENSG00000282079.1	TAS2R64P	ENST00000633680.1|ENSG00000282079.1|OTTHUMG00000190786.1|OTTHUMT00000486017.1|TAS2R64P-001|TAS2R64P|923|unprocessed_pseudogene|	0	0	0	0	0	0	0	0	0	1
ENST00000633687.1	ENSG00000282086.1	PKD1P6	ENST00000633687.1|ENSG00000282086.1|OTTHUMG00000191076.2|OTTHUMT00000487333.1|PKD1P6-001|PKD1P6|3708|transcribed_unprocessed_pseudogene|	0	0	0	0	0	0	0	1	0	0
ENST00000633701.1	ENSG00000282739.1	SLC25A26	ENST00000633701.1|ENSG00000282739.1|OTTHUMG00000149917.6|OTTHUMT00000313894.2|SLC25A26-001|SLC25A26|2673|protein_coding|	0	0	0	0	0	0	1	1	0	0
ENST00000633805.1	ENSG00000282095.1	HNRNPCL3	ENST00000633805.1|ENSG00000282095.1|OTTHUMG00000189238.1|OTTHUMT00000479154.1|HNRNPCL3-001|HNRNPCL3|882|protein_coding|	0	0	0	0	0	0	0	0	0	1
ENST00000633863.1	ENSG00000282559.1	HNRNPCL3	ENST00000633863.1|ENSG00000282559.1|OTTHUMG00000189236.2|OTTHUMT00000479152.2|HNRNPCL3-001|HNRNPCL3|1148|protein_coding|	0	0	0	0	0	0	0	0	0	1
ENST00000633918.1	ENSG00000282472.1	ERICH1-AS1	ENST00000633918.1|ENSG00000282472.1|OTTHUMG00000190596.1|OTTHUMT00000485293.1|ERICH1-AS1-005|ERICH1-AS1|260|antisense|	0	0	0	1	0	0	0	1	0	0
ENST00000633969.1	ENSG00000275896.4	PRSS2	ENST00000633969.1|ENSG00000275896.4|OTTHUMG00000158904.8|-|PRSS2-204|PRSS2|852|protein_coding|	0	1	0	0	0	0	0	0	0	1
ENST00000634019.1	ENSG00000275896.4	PRSS2	ENST00000634019.1|ENSG00000275896.4|OTTHUMG00000158904.8|-|PRSS2-205|PRSS2|886|protein_coding|	0	1	0	0	0	0	0	0	0	1
ENST00000634025.1	ENSG00000282508.1	LINC01002	ENST00000634025.1|ENSG00000282508.1|OTTHUMG00000188608.4|OTTHUMT00000475125.1|LINC01002-023|LINC01002|555|lincRNA|	0	0	0	1	0	0	0	0	0	0
ENST00000634030.1	ENSG00000281994.1	NPIPA1	ENST00000634030.1|ENSG00000281994.1|OTTHUMG00000191089.2|OTTHUMT00000487335.1|NPIPA1-001|NPIPA1|1127|protein_coding|	0	0	0	0	0	0	0	1	0	0
ENST00000634064.1	ENSG00000282566.1	PRAMEF26	ENST00000634064.1|ENSG00000282566.1|OTTHUMG00000074741.3|-|PRAMEF26-207|PRAMEF26|1600|protein_coding|	0	0	0	0	0	0	0	1	0	0
Total				22	45	26	109	122	88	82	264	208	151

## Sheet: refseq71_problem_txpts
Accession	GeneID	GeneSymbol	Description	PMID_25086666	MedicalExome	GRCh38 split	GRCh38 low coverage	GRCh38 not found	GRCh38 not accepted	GRCh37 split	GRCh37 low coverage	GRCh37 not found	GRCh37 not accepted	GRCh37 dropped at consolidation	GRCh38 dropped at consolidation
NM_000442.4	5175	PECAM1	Homo sapiens platelet/endothelial cell adhesion molecule 1 (PECAM1), mRNA	0	0	0	0	0	0	0	1	0	0	0	0
NM_001002029.3	721	C4B	Homo sapiens complement component 4B (Chido blood group) (C4B), mRNA	0	1	0	0	0	0	0	0	0	0	1	1
NM_001002905.1	26494	OR8G1	Homo sapiens olfactory receptor, family 8, subfamily G, member 1 (gene/pseudogene) (OR8G1), transcript variant 1, coding, mRNA	0	0	0	0	0	0	0	0	0	0	1	0
NM_001005513.1	403257	OR4C45	Homo sapiens olfactory receptor, family 4, subfamily C, member 45 (OR4C45), mRNA	0	0	0	0	0	0	0	0	0	1	0	0
NM_001012288.2	64109	CRLF2	Homo sapiens cytokine receptor-like factor 2 (CRLF2), transcript variant 2, mRNA	0	0	0	0	0	0	0	1	0	0	0	0
NM_001012709.1	387267	KRTAP5-4	Homo sapiens keratin associated protein 5-4 (KRTAP5-4), mRNA	0	0	0	1	0	0	0	1	0	1	0	0
NM_001013356.2	504189	OR8U8	Homo sapiens olfactory receptor, family 8, subfamily U, member 8 (OR8U8), mRNA	0	0	0	0	0	0	0	0	0	1	0	0
NM_001013357.1	504190	OR8U9	Homo sapiens olfactory receptor, family 8, subfamily U, member 9 (OR8U9), mRNA	0	0	0	0	0	0	0	0	0	1	0	0
NM_001013358.2	504191	OR9G9	Homo sapiens olfactory receptor, family 9, subfamily G, member 9 (OR9G9), mRNA	0	0	0	0	0	0	0	0	0	1	0	0
NM_001017436.1	441520	CT45A4	Homo sapiens cancer/testis antigen family 45, member A4 (CT45A4), mRNA	0	0	0	0	0	1	0	0	0	0	0	0
NM_001017438.2	541465	CT45A6	Homo sapiens cancer/testis antigen family 45, member A6 (CT45A6), mRNA	0	0	0	0	0	0	0	0	0	0	1	0
NM_001017915.2	3635	INPP5D	Homo sapiens inositol polyphosphate-5-phosphatase D (INPP5D), transcript variant 1, mRNA	1	1	0	0	0	0	1	1	0	0	0	0
NM_001037501.2	728841	NBPF8	Homo sapiens neuroblastoma breakpoint family, member 8 (NBPF8), transcript variant 1, mRNA	0	0	0	0	0	0	1	1	0	0	0	0
NM_001037675.3	400818	NBPF9	Homo sapiens neuroblastoma breakpoint family, member 9 (NBPF9), transcript variant 2, mRNA	0	0	0	0	0	0	1	1	0	0	0	0
NM_001039127.5	255403	ZNF718	Homo sapiens zinc finger protein 718 (ZNF718), transcript variant 1, mRNA	0	0	0	0	0	0	0	1	0	0	0	0
NM_001039350.2	1804	DPP6	Homo sapiens dipeptidyl-peptidase 6 (DPP6), transcript variant 3, mRNA	0	1	0	0	0	0	1	1	0	0	0	0
NM_001042490.3	730394	GTF2H2C_2	Homo sapiens GTF2H2 family member C, copy 2 (GTF2H2C_2), mRNA	0	0	0	0	0	0	0	0	0	1	0	0
NM_001045480.1	654348	PRAMEF16	Homo sapiens PRAME family member 16 (PRAMEF16), mRNA	1	0	0	0	0	1	0	0	0	0	0	0
NM_001077693.3	641700	ECSCR	Homo sapiens endothelial cell surface expressed chemotaxis and apoptosis regulator (ECSCR), transcript variant 1, mRNA	0	0	1	1	0	0	1	1	0	0	0	0
NM_001085423.1	284021	MILR1	Homo sapiens mast cell immunoglobulin-like receptor 1 (MILR1), transcript variant L, mRNA	0	0	0	0	0	0	0	1	0	0	0	0
NM_001085474.1	646627	LYPD8	Homo sapiens LY6/PLAUR domain containing 8 (LYPD8), transcript variant 1, mRNA	0	0	0	0	0	0	0	1	0	0	0	0
NM_001097610.2	653486	SCGB1C2	Homo sapiens secretoglobin, family 1C, member 2 (SCGB1C2), mRNA	0	0	0	0	0	0	0	0	0	1	0	0
NM_001098407.1	729408	GAGE2D	Homo sapiens G antigen 2D (GAGE2D), mRNA	0	0	0	0	0	1	0	0	0	0	0	0
NM_001098411.3	645037	GAGE2B	Homo sapiens G antigen 2B (GAGE2B), mRNA	0	0	0	0	0	1	0	0	0	0	0	0
NM_001099289.2	344558	SH3RF3	Homo sapiens SH3 domain containing ring finger 3 (SH3RF3), mRNA	0	0	0	0	0	0	1	1	0	0	0	0
NM_001100631.1	653606	PRAMEF22	Homo sapiens PRAME family member 22 (PRAMEF22), mRNA	1	0	0	1	0	0	0	0	0	0	0	0
NM_001100817.1	728929	TCEB3CL	Homo sapiens transcription elongation factor B polypeptide 3C-like (TCEB3CL), mRNA	0	0	0	1	0	0	0	0	0	0	0	0
NM_001113239.2	28996	HIPK2	Homo sapiens homeodomain interacting protein kinase 2 (HIPK2), transcript variant 2, mRNA	0	0	0	0	0	0	1	1	0	0	0	0
NM_001122636.1	50614	GALNT9	Homo sapiens polypeptide N-acetylgalactosaminyltransferase 9 (GALNT9), transcript variant A, mRNA	0	1	1	1	0	0	1	1	0	0	0	0
NM_001127200.1	26749	GAGE2E	Homo sapiens G antigen 2E (GAGE2E), mRNA	0	0	0	0	0	1	0	0	0	0	0	0
NM_001127345.1	729428	GAGE12B	Homo sapiens G antigen 12B (GAGE12B), mRNA	0	0	0	0	0	0	0	0	0	1	0	0
NM_001143962.1	388743	CAPN8	Homo sapiens calpain 8 (CAPN8), mRNA	0	0	1	1	0	0	0	1	0	0	0	0
NM_001145026.1	374462	PTPRQ	Homo sapiens protein tyrosine phosphatase, receptor type, Q (PTPRQ), mRNA	0	1	0	0	0	0	1	1	0	0	0	0
NM_001146181.2	649330	HNRNPCL3	Homo sapiens heterogeneous nuclear ribonucleoprotein C-like 3 (HNRNPCL3), mRNA	0	0	0	0	0	0	0	0	0	1	0	0
NM_001146336.1	283953	TMEM114	Homo sapiens transmembrane protein 114 (TMEM114), transcript variant 1, mRNA	0	1	0	0	0	0	0	1	0	0	0	0
NM_001164417.2	727837	SSX2B	Homo sapiens synovial sarcoma, X breakpoint 2B (SSX2B), transcript variant 2, mRNA	0	0	0	0	0	0	0	0	0	1	0	0
NM_001164465.3	647042	GOLGA6L10	Homo sapiens golgin A6 family-like 10 (GOLGA6L10), mRNA	0	0	0	0	0	0	0	1	0	0	0	0
NM_001164522.2	338382	RAB7B	Homo sapiens RAB7B, member RAS oncogene family (RAB7B), transcript variant 2, mRNA	0	0	0	0	0	0	0	0	1	0	0	0
NM_001170637.3	23380	SRGAP2	Homo sapiens SLIT-ROBO Rho GTPase activating protein 2 (SRGAP2), transcript variant 3, mRNA	0	0	0	0	0	0	1	1	0	0	0	0
NM_001172654.2	11026	LILRA3	Homo sapiens leukocyte immunoglobulin-like receptor, subfamily A (without TM domain), member 3 (LILRA3), transcript variant 2, mRNA	0	1	0	1	0	0	0	0	0	0	0	0
NM_001187.1	574	BAGE	Homo sapiens B melanoma antigen (BAGE), mRNA	0	0	1	0	0	0	0	1	0	1	0	0
NM_001193289.1	100913187	APOBEC3A_B	Homo sapiens APOBEC3A and APOBEC3B deletion hybrid (APOBEC3A_B), mRNA	0	0	0	0	0	0	0	0	0	1	0	0
NM_001194958.2	100134444	KCNJ18	Homo sapiens potassium channel, inwardly rectifying subfamily J, member 18 (KCNJ18), mRNA	0	1	0	0	0	0	0	0	0	0	1	0
NM_001201380.2	728577	CNTNAP3B	Homo sapiens contactin associated protein-like 3B (CNTNAP3B), mRNA	0	0	0	0	0	0	1	1	0	0	0	0
NM_001220765.2	10320	IKZF1	Homo sapiens IKAROS family zinc finger 1 (Ikaros) (IKZF1), transcript variant 2, mRNA	0	1	0	0	0	0	1	1	0	0	0	0
NM_001220767.2	10320	IKZF1	Homo sapiens IKAROS family zinc finger 1 (Ikaros) (IKZF1), transcript variant 4, mRNA	0	1	0	0	0	0	0	1	0	0	0	0
NM_001220768.2	10320	IKZF1	Homo sapiens IKAROS family zinc finger 1 (Ikaros) (IKZF1), transcript variant 5, mRNA	0	1	0	0	0	0	0	1	0	0	0	0
NM_001220770.2	10320	IKZF1	Homo sapiens IKAROS family zinc finger 1 (Ikaros) (IKZF1), transcript variant 7, mRNA	0	1	0	0	0	0	0	1	0	0	0	0
NM_001220771.2	10320	IKZF1	Homo sapiens IKAROS family zinc finger 1 (Ikaros) (IKZF1), transcript variant 8, mRNA	0	1	0	0	0	0	0	1	0	0	0	0
NM_001271870.2	647135	SRGAP2B	Homo sapiens SLIT-ROBO Rho GTPase activating protein 2B (SRGAP2B), mRNA	0	0	0	0	0	0	0	1	0	0	0	0
NM_001271872.1	653464	SRGAP2C	Homo sapiens SLIT-ROBO Rho GTPase activating protein 2C (SRGAP2C), mRNA	0	0	0	0	0	0	1	1	0	0	1	0
NM_001271893.3	117581	TWIST2	Homo sapiens twist family bHLH transcription factor 2 (TWIST2), transcript variant 1, mRNA	0	1	0	0	0	0	1	0	0	0	0	0
NM_001277332.1	100505724	KRTAP9-7	Homo sapiens keratin associated protein 9-7 (KRTAP9-7), mRNA	0	0	0	0	0	0	0	0	0	0	0	1
NM_001277444.1	400818	NBPF9	Homo sapiens neuroblastoma breakpoint family, member 9 (NBPF9), transcript variant 1, mRNA	0	0	0	0	0	0	1	1	0	0	0	0
NM_001278267.1	100288142	NBPF20	Homo sapiens neuroblastoma breakpoint family, member 20 (NBPF20), mRNA	0	0	0	0	0	0	0	1	0	0	0	0
NM_001278701.1	727837	SSX2B	Homo sapiens synovial sarcoma, X breakpoint 2B (SSX2B), transcript variant 1, mRNA	0	0	0	0	0	0	0	0	0	1	0	0
NM_001278702.1	727837	SSX2B	Homo sapiens synovial sarcoma, X breakpoint 2B (SSX2B), transcript variant 3, mRNA	0	0	0	0	0	0	0	0	0	1	0	0
NM_001278795.1	100996758	CH17-360D5.1	Homo sapiens neuropeptide Y receptor type 4-like (CH17-360D5.1), mRNA	0	0	0	0	0	0	0	0	0	0	1	0
NM_001289930.1	255403	ZNF718	Homo sapiens zinc finger protein 718 (ZNF718), transcript variant 2, mRNA	0	0	0	0	0	0	0	1	0	0	0	0
NM_001289931.1	255403	ZNF718	Homo sapiens zinc finger protein 718 (ZNF718), transcript variant 3, mRNA	0	0	0	0	0	0	0	1	0	0	0	0
NM_001290033.1	26958	COPG2	Homo sapiens coatomer protein complex, subunit gamma 2 (COPG2), transcript variant 2, mRNA	0	0	0	0	0	0	0	1	0	1	0	0
NM_001290095.1	283953	TMEM114	Homo sapiens transmembrane protein 114 (TMEM114), transcript variant 2, mRNA	0	1	0	0	0	0	0	1	0	0	0	0
NM_001290097.1	283953	TMEM114	Homo sapiens transmembrane protein 114 (TMEM114), transcript variant 3, mRNA	0	1	0	0	0	0	0	1	0	0	0	0
NM_001290098.1	283953	TMEM114	Homo sapiens transmembrane protein 114 (TMEM114), transcript variant 4, mRNA	0	1	0	0	0	0	0	1	0	0	0	0
NM_001290252.1	1804	DPP6	Homo sapiens dipeptidyl-peptidase 6 (DPP6), transcript variant 4, mRNA	0	1	0	0	0	0	1	1	0	0	0	0
NM_001290253.1	1804	DPP6	Homo sapiens dipeptidyl-peptidase 6 (DPP6), transcript variant 5, mRNA	0	1	0	0	0	0	1	1	0	0	0	0
NM_001291281.2	100132074	FOXO6	Homo sapiens forkhead box O6 (FOXO6), mRNA	0	0	0	1	0	0	0	1	0	0	0	0
NM_001291283.1	646627	LYPD8	Homo sapiens LY6/PLAUR domain containing 8 (LYPD8), transcript variant 2, mRNA	0	0	0	0	0	0	0	1	0	0	0	0
NM_001291310.1	55844	PPP2R2D	Homo sapiens protein phosphatase 2, regulatory subunit B, delta (PPP2R2D), transcript variant 3, mRNA	0	0	0	0	0	0	0	0	0	1	0	0
NM_001291316.1	284021	MILR1	Homo sapiens mast cell immunoglobulin-like receptor 1 (MILR1), transcript variant S1, mRNA	0	0	0	0	0	0	0	1	0	0	0	0
NM_001291317.1	284021	MILR1	Homo sapiens mast cell immunoglobulin-like receptor 1 (MILR1), transcript variant S2, mRNA	0	0	0	0	0	0	0	1	0	0	0	0
NM_001291345.1	984	CDK11B	Homo sapiens cyclin-dependent kinase 11B (CDK11B), transcript variant 10, mRNA	0	0	0	0	0	0	0	1	0	0	0	0
NM_001291380.1	400736	PRAMEF13	Homo sapiens PRAME family member 13 (PRAMEF13), mRNA	0	0	0	0	0	0	0	0	0	1	0	0
NM_001291463.1	102724862	TBC1D3I	Homo sapiens TBC1 domain family, member 3I (TBC1D3I), mRNA	0	0	0	0	0	0	0	0	0	0	1	0
NM_001291464.1	101060351	TBC1D3K	Homo sapiens TBC1 domain family, member 3K (TBC1D3K), mRNA	0	0	0	0	0	0	0	0	0	0	1	0
NM_001291465.1	101060389	LOC101060389	Homo sapiens TBC1 domain family member-like (LOC101060389), mRNA	0	0	0	0	0	0	0	0	0	0	1	0
NM_001291466.1	102723859	TBC1D3E	Homo sapiens TBC1 domain family, member 3E (TBC1D3E), mRNA	0	0	0	0	0	0	0	0	0	0	1	0
NM_001291516.1	399693	MGC50722	Homo sapiens uncharacterized MGC50722 (MGC50722), transcript variant 1, mRNA	0	0	0	0	0	0	0	0	1	0	0	0
NM_001291535.1	102723737	CT45A8	Homo sapiens cancer/testis antigen family 45, member A8 (CT45A8), mRNA	0	0	0	0	0	0	0	0	0	0	1	0
NM_001291540.1	102723680	CT45A9	Homo sapiens cancer/testis antigen family 45, member A9 (CT45A9), mRNA	0	0	0	0	0	0	0	0	0	0	1	0
NM_001291543.1	101060211	CT45A7	Homo sapiens cancer/testis antigen family 45, member A7 (CT45A7), mRNA	0	0	0	0	0	0	0	0	0	0	1	0
NM_001291661.1	201625	DNAH12	Homo sapiens dynein, axonemal, heavy chain 12 (DNAH12), transcript variant 3, mRNA	0	0	0	0	0	0	0	1	0	0	0	0
NM_001291737.1	100133941	CD24	Homo sapiens CD24 molecule (CD24), transcript variant 2, mRNA	0	0	0	0	0	0	0	0	0	1	0	0
NM_001291738.1	100133941	CD24	Homo sapiens CD24 molecule (CD24), transcript variant 3, mRNA	0	0	0	0	0	0	0	0	0	1	0	0
NM_001291739.1	100133941	CD24	Homo sapiens CD24 molecule (CD24), transcript variant 4, mRNA	0	0	0	0	0	0	0	1	0	1	0	0
NM_001291815.1	256158	HMCN2	Homo sapiens hemicentin 2 (HMCN2), mRNA	0	0	0	0	0	0	1	1	0	0	0	0
NM_001291837.1	10320	IKZF1	Homo sapiens IKAROS family zinc finger 1 (Ikaros) (IKZF1), transcript variant 14, mRNA	0	1	0	0	0	0	1	1	0	0	0	0
NM_001291838.1	10320	IKZF1	Homo sapiens IKAROS family zinc finger 1 (Ikaros) (IKZF1), transcript variant Ik-2, mRNA	0	1	0	0	0	0	1	1	0	0	0	0
NM_001291839.1	10320	IKZF1	Homo sapiens IKAROS family zinc finger 1 (Ikaros) (IKZF1), transcript variant Ik-4, mRNA	0	1	0	0	0	0	0	1	0	0	0	0
NM_001291840.1	10320	IKZF1	Homo sapiens IKAROS family zinc finger 1 (Ikaros) (IKZF1), transcript variant Ik-6, mRNA	0	1	0	0	0	0	0	1	0	0	0	0
NM_001291841.1	10320	IKZF1	Homo sapiens IKAROS family zinc finger 1 (Ikaros) (IKZF1), transcript variant Ik-7, mRNA	0	1	0	0	0	0	0	1	0	0	0	0
NM_001291842.1	10320	IKZF1	Homo sapiens IKAROS family zinc finger 1 (Ikaros) (IKZF1), transcript variant Ik-7(del), mRNA	0	1	0	0	0	0	0	1	0	0	0	0
NM_001291843.1	10320	IKZF1	Homo sapiens IKAROS family zinc finger 1 (Ikaros) (IKZF1), transcript variant Ik-8, mRNA	0	1	0	0	0	0	0	1	0	0	0	0
NM_001291844.1	10320	IKZF1	Homo sapiens IKAROS family zinc finger 1 (Ikaros) (IKZF1), transcript variant Ik-8(del), mRNA	0	1	0	0	0	0	0	1	0	0	0	0
NM_001291845.1	10320	IKZF1	Homo sapiens IKAROS family zinc finger 1 (Ikaros) (IKZF1), transcript variant 15, mRNA	0	1	0	0	0	0	1	1	0	0	0	0
NM_001291846.1	10320	IKZF1	Homo sapiens IKAROS family zinc finger 1 (Ikaros) (IKZF1), transcript variant 16, mRNA	0	1	0	0	0	0	1	1	0	0	0	0
NM_001291847.1	10320	IKZF1	Homo sapiens IKAROS family zinc finger 1 (Ikaros) (IKZF1), transcript variant 17, mRNA	0	1	0	0	0	0	1	1	0	0	0	0
NM_001293739.1	641700	ECSCR	Homo sapiens endothelial cell surface expressed chemotaxis and apoptosis regulator (ECSCR), transcript variant 2, mRNA	0	0	1	1	0	0	1	1	0	0	0	0
NM_001300891.1	101929983	LOC101929983	Homo sapiens PRAME family member 9/15-like (LOC101929983), mRNA	0	0	0	0	0	0	0	0	0	0	1	0
NM_001300952.1	23380	SRGAP2	Homo sapiens SLIT-ROBO Rho GTPase activating protein 2 (SRGAP2), transcript variant 4, mRNA	0	0	0	0	0	0	1	1	0	0	0	0
NM_001302371.1	100132406	NBPF10	Homo sapiens neuroblastoma breakpoint family, member 10 (NBPF10), transcript variant 1, mRNA	0	0	0	0	0	0	0	0	0	1	0	0
NM_001302551.1	101060301	HNRNPCL4	Homo sapiens heterogeneous nuclear ribonucleoprotein C-like 4 (HNRNPCL4), mRNA	0	0	0	0	0	0	0	0	0	1	0	0
NM_001303414.1	5645	PRSS2	Homo sapiens protease, serine, 2 (trypsin 2) (PRSS2), transcript variant 1, mRNA	0	1	0	0	0	0	0	0	0	1	0	0
NM_001304359.1	4586	MUC5AC	Homo sapiens mucin 5AC, oligomeric mucus/gel-forming (MUC5AC), mRNA	0	0	0	0	0	0	0	1	0	0	0	0
NM_001304839.1	338382	RAB7B	Homo sapiens RAB7B, member RAS oncogene family (RAB7B), transcript variant 3, mRNA	0	0	0	0	0	0	0	0	1	0	0	0
NM_001306072.1	645359	PRAMEF26	Homo sapiens PRAME family member 26 (PRAMEF26), mRNA	0	0	0	0	0	0	0	1	0	0	0	0
NM_001310134.1	441873	PRAMEF25	Homo sapiens PRAME family member 25 (PRAMEF25), mRNA	0	0	0	0	0	0	0	1	0	0	1	0
NM_001472.2	2574	GAGE2C	Homo sapiens G antigen 2C (GAGE2C), mRNA	0	0	0	0	0	1	0	0	0	0	0	0
NM_001474.1	2576	GAGE4	Homo sapiens G antigen 4 (GAGE4), mRNA	0	0	0	0	0	1	0	0	0	1	0	0
NM_001475.1	2577	GAGE5	Homo sapiens G antigen 5 (GAGE5), mRNA	0	0	0	0	0	0	0	0	0	1	0	0
NM_001477.1	26748	GAGE12I	Homo sapiens G antigen 12I (GAGE12I), mRNA	0	0	0	0	0	1	0	0	0	0	0	0
NM_001733.4	715	C1R	Homo sapiens complement component 1, r subcomponent (C1R), mRNA	0	1	1	1	0	0	1	1	0	0	0	0
NM_001787.2	984	CDK11B	Homo sapiens cyclin-dependent kinase 11B (CDK11B), transcript variant 1, mRNA	0	0	0	0	0	0	0	1	0	0	0	0
NM_001936.4	1804	DPP6	Homo sapiens dipeptidyl-peptidase 6 (DPP6), transcript variant 2, mRNA	0	1	0	0	0	0	1	1	0	0	0	0
NM_002457.3	4583	MUC2	Homo sapiens mucin 2, oligomeric mucus/gel-forming (MUC2), mRNA	0	0	0	1	0	0	0	1	0	0	0	0
NM_002770.3	5645	PRSS2	Homo sapiens protease, serine, 2 (trypsin 2) (PRSS2), transcript variant 2, mRNA	0	1	0	0	0	0	0	0	0	1	0	0
NM_002929.2	6011	GRK1	Homo sapiens G protein-coupled receptor kinase 1 (GRK1), mRNA	0	1	1	1	0	0	1	1	0	0	0	0
NM_003585.4	8447	DOC2B	Homo sapiens double C2-like domains, beta (DOC2B), mRNA	0	0	0	0	0	0	0	1	0	0	0	0
NM_003868.2	8823	FGF16	Homo sapiens fibroblast growth factor 16 (FGF16), mRNA	0	0	0	0	0	0	0	1	0	0	0	0
NM_003890.2	8857	FCGBP	Homo sapiens Fc fragment of IgG binding protein (FCGBP), mRNA	0	0	0	1	0	0	0	0	0	0	0	0
NM_004522.2	3800	KIF5C	Homo sapiens kinesin family member 5C (KIF5C), transcript variant 1, mRNA	1	0	0	0	0	0	1	1	0	0	0	0
NM_005541.4	3635	INPP5D	Homo sapiens inositol polyphosphate-5-phosphatase D (INPP5D), transcript variant 2, mRNA	0	1	0	0	0	0	1	1	0	0	0	0
NM_005960.1	4584	MUC3A	Homo sapiens mucin 3A, cell surface associated (MUC3A), mRNA	0	0	0	0	0	0	0	1	0	0	0	0
NM_006060.5	10320	IKZF1	Homo sapiens IKAROS family zinc finger 1 (Ikaros) (IKZF1), transcript variant 1, mRNA	1	1	0	0	0	0	1	1	0	0	0	0
NM_006220.2	390502	SERPINA2	Homo sapiens serpin peptidase inhibitor, clade A (alpha-1 antiproteinase, antitrypsin), member 2 (gene/pseudogene) (SERPINA2), transcript variant 1, mRNA	0	0	0	1	0	0	0	1	0	0	0	0
NM_006865.4	11026	LILRA3	Homo sapiens leukocyte immunoglobulin-like receptor, subfamily A (without TM domain), member 3 (LILRA3), transcript variant 1, mRNA	0	1	0	1	0	0	0	0	0	0	0	0
NM_012133.5	26958	COPG2	Homo sapiens coatomer protein complex, subunit gamma 2 (COPG2), transcript variant 1, mRNA	0	0	0	0	0	0	0	1	0	0	0	0
NM_012146.1	26584	DUX1	Homo sapiens double homeobox 1 (DUX1), mRNA	0	0	0	0	0	1	0	0	0	1	0	0
NM_012148.2	26582	DUX3	Homo sapiens double homeobox 3 (DUX3), mRNA	0	0	0	0	0	1	0	0	0	1	0	0
NM_012149.2	26581	DUX5	Homo sapiens double homeobox 5 (DUX5), mRNA	0	0	0	0	0	1	0	0	0	1	0	0
NM_012196.1	100101629	GAGE8	Homo sapiens G antigen 8 (GAGE8), mRNA	0	0	0	0	0	1	0	0	0	0	1	0
NM_012227.3	8225	GTPBP6	Homo sapiens GTP binding protein 6 (putative) (GTPBP6), mRNA	0	0	0	0	0	0	0	1	0	0	0	0
NM_013230.3	100133941	CD24	Homo sapiens CD24 molecule (CD24), transcript variant 1, mRNA	0	0	0	0	0	0	0	0	0	1	0	0
NM_014938.5	22877	MLXIP	Homo sapiens MLX interacting protein (MLXIP), mRNA	0	0	0	0	0	0	0	1	0	0	0	0
NM_015326.4	23380	SRGAP2	Homo sapiens SLIT-ROBO Rho GTPase activating protein 2 (SRGAP2), transcript variant 1, mRNA	1	0	0	0	0	0	1	1	0	0	0	0
NM_015383.2	25832	NBPF14	Homo sapiens neuroblastoma breakpoint family, member 14 (NBPF14), mRNA	0	0	0	0	0	0	0	0	0	1	0	0
NM_017940.4	55672	NBPF1	Homo sapiens neuroblastoma breakpoint family, member 1 (NBPF1), mRNA	0	1	0	1	0	0	0	1	0	0	0	0
NM_018461.4	55844	PPP2R2D	Homo sapiens protein phosphatase 2, regulatory subunit B, delta (PPP2R2D), transcript variant 1, mRNA	0	0	0	0	0	0	0	1	0	0	0	0
NM_018711.4	55530	SVOP	Homo sapiens SV2 related protein (SVOP), mRNA	0	0	0	0	0	0	0	1	0	0	0	0
NM_020979.4	10603	SH2B2	Homo sapiens SH2B adaptor protein 2 (SH2B2), mRNA	0	0	0	0	0	0	0	1	0	0	0	0
NM_021123.2	2579	GAGE7	Homo sapiens G antigen 7 (GAGE7), mRNA	0	0	0	0	0	0	0	0	0	1	0	0
NM_022148.3	64109	CRLF2	Homo sapiens cytokine receptor-like factor 2 (CRLF2), transcript variant 1, mRNA	0	0	0	0	0	0	0	1	0	0	0	0
NM_022661.3	64663	SPANXC	Homo sapiens SPANX family, member C (SPANXC), mRNA	0	0	0	0	0	0	0	0	0	0	1	0
NM_022740.4	28996	HIPK2	Homo sapiens homeodomain interacting protein kinase 2 (HIPK2), transcript variant 1, mRNA	0	0	0	0	0	0	1	1	0	0	0	0
NM_024318.3	79168	LILRA6	Homo sapiens leukocyte immunoglobulin-like receptor, subfamily A (with TM domain), member 6 (LILRA6), transcript variant 1, mRNA	0	0	0	0	0	0	0	0	0	0	1	0
NM_031308.3	83481	EPPK1	Homo sapiens epiplakin 1 (EPPK1), mRNA	0	0	0	0	0	0	0	1	0	0	0	0
NM_031421.3	83538	TTC25	Homo sapiens tetratricopeptide repeat domain 25 (TTC25), transcript variant 1, mRNA	0	0	0	0	0	0	0	1	0	0	0	0
NM_032258.4	84218	TBC1D3F	Homo sapiens TBC1 domain family, member 3F (TBC1D3F), mRNA	0	0	0	0	0	0	0	0	0	0	1	0
NM_033486.2	984	CDK11B	Homo sapiens cyclin-dependent kinase 11B (CDK11B), transcript variant 2, mRNA	0	0	0	0	0	0	0	1	0	0	0	0
NM_033489.2	984	CDK11B	Homo sapiens cyclin-dependent kinase 11B (CDK11B), transcript variant 5, mRNA	1	0	0	0	0	0	0	1	0	0	0	0
NM_130797.3	1804	DPP6	Homo sapiens dipeptidyl-peptidase 6 (DPP6), transcript variant 1, mRNA	0	1	0	0	0	0	1	1	0	0	0	0
NM_138352.1	90378	SAMD1	Homo sapiens sterile alpha motif domain containing 1 (SAMD1), mRNA	0	0	0	1	0	0	0	1	0	0	0	0
NM_152582.6	728911	CT45A2	Homo sapiens cancer/testis antigen family 45, member A2 (CT45A2), mRNA	0	0	0	0	0	0	0	0	0	0	1	0
NM_173471.3	115286	SLC25A26	Homo sapiens solute carrier family 25 (S-adenosylmethionine carrier), member 26 (SLC25A26), transcript variant 1, mRNA	0	0	0	0	0	0	1	0	0	0	0	0
NM_176886.2	259291	TAS2R45	Homo sapiens taste receptor, type 2, member 45 (TAS2R45), mRNA	0	1	0	0	0	0	0	0	0	1	0	0
NM_177403.5	338382	RAB7B	Homo sapiens RAB7B, member RAS oncogene family (RAB7B), transcript variant 1, mRNA	0	0	0	0	0	0	0	0	1	0	0	0
NM_181704.1	85317	BAGE4	Homo sapiens B melanoma antigen family, member 4 (BAGE4), mRNA	0	0	0	0	0	1	0	0	0	1	0	0
NM_182481.1	85318	BAGE3	Homo sapiens B melanoma antigen family, member 3 (BAGE3), mRNA	0	0	0	0	0	1	0	0	0	1	0	0
NM_182484.1	85316	BAGE5	Homo sapiens B melanoma antigen family, member 5 (BAGE5), mRNA	0	0	0	1	0	1	0	1	0	1	0	0
NM_182705.2	359845	FAM101B	Homo sapiens family with sequence similarity 101, member B (FAM101B), mRNA	0	0	0	1	0	0	0	1	0	0	0	0
NM_207355.3	102724631	POTEB3	Homo sapiens POTE ankyrin domain family, member B3 (POTEB3), transcript variant 1, mRNA	1	0	0	0	0	0	0	1	0	0	1	0
NM_207418.2	728833	FAM72D	Homo sapiens family with sequence similarity 72, member D (FAM72D), mRNA	0	0	0	0	0	0	0	0	0	0	1	0
NR_002212.4	440672	NUDT4P1	Homo sapiens nudix (nucleoside diphosphate linked moiety X)-type motif 4 pseudogene 1 (NUDT4P1), non-coding RNA	0	0	0	0	0	0	0	0	0	0	1	0
NR_002716.3	6066	RNU2-1	Homo sapiens RNA, U2 small nuclear 1 (RNU2-1), small nuclear RNA	0	0	0	0	0	0	0	0	1	0	0	0
NR_015416.1	727924	LOC727924	Homo sapiens uncharacterized LOC727924 (LOC727924), long non-coding RNA	0	0	0	0	0	0	0	0	0	1	0	0
NR_024086.2	53844	COPG2IT1	Homo sapiens COPG2 imprinted transcript 1 (non-protein coding) (COPG2IT1), long non-coding RNA	0	0	0	0	0	0	0	0	1	0	0	0
NR_024443.3	100133920	LOC100133920	Homo sapiens uncharacterized LOC100133920 (LOC100133920), long non-coding RNA	0	0	0	0	0	0	0	0	0	1	0	0
NR_027434.2	100131532	LOC100131532	Homo sapiens uncharacterized LOC100131532 (LOC100131532), long non-coding RNA	0	0	0	0	0	0	0	0	1	0	0	0
NR_027454.2	731656	LINC01348	Homo sapiens long intergenic non-protein coding RNA 1348 (LINC01348), long non-coding RNA	0	0	0	0	0	0	0	0	1	0	0	0
NR_030241.2	693124	MIR532	Homo sapiens microRNA 532 (MIR532), microRNA	0	0	0	0	0	0	0	0	1	0	0	0
NR_030639.3	100126352	MIR941-3	Homo sapiens microRNA 941-3 (MIR941-3), microRNA	0	0	0	0	0	0	0	0	0	0	1	1
NR_031600.2	100302196	MIR1234	Homo sapiens microRNA 1234 (MIR1234), microRNA	0	0	0	0	0	0	0	0	1	0	0	0
NR_036062.2	100422949	MIR3118-2	Homo sapiens microRNA 3118-2 (MIR3118-2), microRNA	0	0	0	0	0	0	0	0	0	0	1	0
NR_036063.2	100422844	MIR3118-3	Homo sapiens microRNA 3118-3 (MIR3118-3), microRNA	0	0	0	0	0	0	0	0	0	0	1	0
NR_036245.2	100422858	MIR4285	Homo sapiens microRNA 4285 (MIR4285), microRNA	0	0	0	0	0	0	0	0	1	0	0	0
NR_036753.1	401983	ZNF847P	Homo sapiens zinc finger protein 847, pseudogene (ZNF847P), non-coding RNA	0	0	0	0	1	0	0	0	1	0	0	0
NR_037421.1	100500862	MIR3648-1	Homo sapiens microRNA 3648-1 (MIR3648-1), microRNA	0	0	0	0	0	0	0	0	0	0	1	0
NR_037458.1	100500815	MIR3687-1	Homo sapiens microRNA 3687-1 (MIR3687-1), microRNA	0	0	0	0	0	0	0	0	0	0	1	0
NR_037925.1	647476	FRG2EP	Homo sapiens FSHD region gene 2 family, member E, pseudogene (FRG2EP), non-coding RNA	0	0	0	0	0	0	0	0	0	1	0	0
NR_040584.2	442582	STAG3L2	Homo sapiens stromal antigen 3-like 2 (pseudogene) (STAG3L2), non-coding RNA	0	0	0	0	0	0	0	0	0	0	1	0
NR_049895.1	100847005	MIR5701-2	Homo sapiens microRNA 5701-2 (MIR5701-2), microRNA	0	0	0	0	0	0	0	0	0	0	1	0
NR_102404.1	728841	NBPF8	Homo sapiens neuroblastoma breakpoint family, member 8 (NBPF8), transcript variant 2, non-coding RNA	0	0	0	0	0	0	1	0	0	0	0	0
NR_102405.1	728841	NBPF8	Homo sapiens neuroblastoma breakpoint family, member 8 (NBPF8), transcript variant 3, non-coding RNA	0	0	0	0	0	0	1	0	0	0	0	0
NR_104005.1	170688	NUDT4P2	Homo sapiens nudix (nucleoside diphosphate linked moiety X)-type motif 4 pseudogene 2 (NUDT4P2), non-coding RNA	0	0	0	0	0	0	0	0	0	0	1	0
NR_104098.1	79168	LILRA6	Homo sapiens leukocyte immunoglobulin-like receptor, subfamily A (with TM domain), member 6 (LILRA6), transcript variant 2, non-coding RNA	0	0	0	0	0	0	0	0	0	0	1	0
NR_107036.1	102466252	MIR8069-1	Homo sapiens microRNA 8069-1 (MIR8069-1), microRNA	0	0	0	0	0	0	0	0	0	0	1	0
NR_107062.1	102465909	MIR6859-2	Homo sapiens microRNA 6859-2 (MIR6859-2), microRNA	0	0	0	0	0	0	0	0	0	0	1	0
NR_107063.1	102465910	MIR6859-3	Homo sapiens microRNA 6859-3 (MIR6859-3), microRNA	0	0	0	0	0	0	0	0	0	0	1	0
NR_110752.1	102724631	POTEB3	Homo sapiens POTE ankyrin domain family, member B3 (POTEB3), transcript variant 2, non-coding RNA	0	0	0	0	0	0	0	0	0	0	1	0
NR_110982.2	103021295	LOC103021295	Homo sapiens uncharacterized LOC103021295 (LOC103021295), long non-coding RNA	0	0	0	0	0	0	0	0	0	0	1	0
NR_110983.1	103021296	LOC103021296	Homo sapiens uncharacterized LOC103021296 (LOC103021296), transcript variant 1, long non-coding RNA	0	0	0	0	0	0	0	0	1	0	0	0
NR_110984.1	103021296	LOC103021296	Homo sapiens uncharacterized LOC103021296 (LOC103021296), transcript variant 2, long non-coding RNA	0	0	0	0	0	0	0	0	1	0	0	0
NR_111000.1	101060524	LOC101060524	Homo sapiens D(1B) dopamine receptor-like (LOC101060524), non-coding RNA	0	0	0	0	0	0	0	0	0	0	1	0
NR_111893.1	643827	CNTNAP3P2	Homo sapiens contactin associated protein-like 3 pseudogene 2 (CNTNAP3P2), non-coding RNA	0	0	0	0	0	0	1	0	0	0	0	0
NR_111933.1	388692	LOC388692	Homo sapiens uncharacterized LOC388692 (LOC388692), long non-coding RNA	0	0	0	0	0	0	0	0	0	0	1	0
NR_111954.1	103091866	LOC103091866	Homo sapiens uncharacterized LOC103091866 (LOC103091866), transcript variant 1, long non-coding RNA	0	0	0	0	0	0	1	0	0	0	0	0
NR_111955.1	103091866	LOC103091866	Homo sapiens uncharacterized LOC103091866 (LOC103091866), transcript variant 2, long non-coding RNA	0	0	0	0	0	0	1	0	0	0	0	0
NR_111956.1	103091866	LOC103091866	Homo sapiens uncharacterized LOC103091866 (LOC103091866), transcript variant 3, long non-coding RNA	0	0	0	0	0	0	1	0	0	0	0	0
NR_111957.1	103091866	LOC103091866	Homo sapiens uncharacterized LOC103091866 (LOC103091866), transcript variant 4, long non-coding RNA	0	0	0	0	0	0	1	0	0	0	0	0
NR_111958.1	103091866	LOC103091866	Homo sapiens uncharacterized LOC103091866 (LOC103091866), transcript variant 5, long non-coding RNA	0	0	0	0	0	0	1	0	0	0	0	0
NR_111962.1	642402	GOLGA6L17P	Homo sapiens golgin A6 family-like 17, pseudogene (GOLGA6L17P), non-coding RNA	0	0	0	0	0	0	0	0	0	0	1	0
NR_111982.1	399693	MGC50722	Homo sapiens uncharacterized MGC50722 (MGC50722), transcript variant 2, non-coding RNA	0	0	0	0	0	0	0	0	1	0	0	0
NR_117089.1	100133941	CD24	Homo sapiens CD24 molecule (CD24), transcript variant 5, non-coding RNA	0	0	0	0	0	0	0	0	0	1	0	0
NR_117090.1	100133941	CD24	Homo sapiens CD24 molecule (CD24), transcript variant 6, non-coding RNA	0	0	0	0	0	0	0	0	0	1	0	0
NR_120505.1	100653233	LOC100653233	Homo sapiens uncharacterized LOC100653233 (LOC100653233), long non-coding RNA	0	0	0	0	0	0	0	0	0	1	0	0
NR_120535.1	100996712	SRGAP2D	Homo sapiens SLIT-ROBO Rho GTPase activating protein 2D (pseudogene) (SRGAP2D), non-coding RNA	0	0	0	0	0	0	1	0	0	0	0	0
NR_121659.1	641700	ECSCR	Homo sapiens endothelial cell surface expressed chemotaxis and apoptosis regulator (ECSCR), transcript variant 3, non-coding RNA	0	0	1	0	0	0	1	0	0	0	0	0
NR_126392.1	104355151	PWRN4	Homo sapiens Prader-Willi region non-protein coding RNA 4 (PWRN4), long non-coding RNA	0	0	0	0	0	1	0	0	0	1	0	0
NR_128706.1	100526648	MIR1273E	Homo sapiens microRNA 1273e (MIR1273E), microRNA	0	0	0	0	0	0	0	0	1	0	0	0
NR_128709.1	103504729	MIR3179-4	Homo sapiens microRNA 3179-4 (MIR3179-4), microRNA	0	0	0	0	0	0	0	0	0	0	1	0
NR_128711.1	103504731	MIR3648-2	Homo sapiens microRNA 3648-2 (MIR3648-2), microRNA	0	0	0	0	0	0	0	0	0	0	1	0
NR_128713.1	103504740	MIR3670-4	Homo sapiens microRNA 3670-4 (MIR3670-4), microRNA	0	0	0	0	0	0	0	0	0	0	1	0
NR_128714.1	103504728	MIR3687-2	Homo sapiens microRNA 3687-2 (MIR3687-2), microRNA	0	0	0	0	0	0	0	0	0	0	1	0
NR_128715.1	103504727	MIR6724-2	Homo sapiens microRNA 6724-2 (MIR6724-2), microRNA	0	0	0	0	0	0	0	0	0	0	1	0
NR_128717.1	103504733	MIR6724-4	Homo sapiens microRNA 6724-4 (MIR6724-4), microRNA	0	0	0	0	0	0	0	0	0	0	1	0
NR_128718.1	103504736	MIR8069-2	Homo sapiens microRNA 8069-2 (MIR8069-2), microRNA	0	0	0	0	0	0	0	0	0	0	1	0
NR_128721.1	103504741	MIR5701-3	Homo sapiens microRNA 5701-3 (MIR5701-3), microRNA	0	0	0	0	0	0	0	0	0	0	1	0
NR_130149.1	5645	PRSS2	Homo sapiens protease, serine, 2 (trypsin 2) (PRSS2), transcript variant 3, non-coding RNA	0	1	0	0	0	0	0	0	0	1	0	0
NR_130704.1	100506123	LOC100506123	Homo sapiens uncharacterized LOC100506123 (LOC100506123), long non-coding RNA	0	0	0	0	0	0	0	0	0	0	1	0
Total				8	42	8	19	1	16	45	93	16	44	49	3
