# Supplementary material for: Evaluation of GRCh38 and de novo haploid genome assemblies demonstrates the enduring quality of the reference assembly
Source: Genome Res. 2017 May;27(5):849–64. doi: 10.1101/gr.213611.116 (PMC5411779; doi:10.1101/gr.213611.116)
Supplement: Supplemental Material [file supp_gr.213611.116_Supplemental_Worksheet_S2.xlsx]

## Sheet: GCF_000001405.26.chr.CH17
#GRCh38_chr	start	stop	libabbr
NC_000001.11	12353795	12954384	CH17
NC_000001.11	13004385	13511421	CH17
NC_000001.11	120036039	121484215	CH17
NC_000001.11	121743637	121976459	CH17
NC_000001.11	143184588	150338619	CH17
NC_000001.11	206050652	206613926	CH17
NC_000002.12	88727973	89330679	CH17
NC_000002.12	89802310	90402511	CH17
NC_000002.12	91402512	91603370	CH17
NC_000004.12	25701	166858	CH17
NC_000004.12	74554513	74740924	CH17
NC_000005.10	98228427	98390413	CH17
NC_000005.10	141074150	141308149	CH17
NC_000006.12	51124657	51233934	CH17
NC_000006.12	57470398	57826755	CH17
NC_000006.12	60229935	60433033	CH17
NC_000006.12	61400073	61470683	CH17
NC_000006.12	95218019	95384667	CH17
NC_000007.14	61747298	61881907	CH17
NC_000007.14	72657575	73392067	CH17
NC_000007.14	74578614	75588254	CH17
NC_000007.14	142229162	143088503	CH17
NC_000008.11	2017224	2817440	CH17
NC_000009.12	40561949	40755398	CH17
NC_000009.12	40910316	40917717	CH17
NC_000009.12	41255545	41269180	CH17
NC_000009.12	43076350	43222167	CH17
NC_000009.12	61434590	61468808	CH17
NC_000009.12	65375124	65595191	CH17
NC_000010.11	46318430	46487959	CH17
NC_000010.11	47870369	48074662	CH17
NC_000011.10	50032873	50099251	CH17
NC_000012.12	11177618	11267408	CH17
NC_000014.9	21570693	22656451	CH17
NC_000014.9	105786368	106860219	CH17
NC_000015.10	82287631	82627213	CH17
NC_000016.10	34339330	34483332	CH17
NC_000016.10	36051431	36217007	CH17
NC_000017.11	21478215	21711361	CH17
NC_000017.11	35919249	38593350	CH17
NC_000017.11	79525673	79735429	CH17
NC_000018.10	20911207	20930937	CH17
NC_000019.10	41456581	41911904	CH17
NC_000019.10	44329783	44742299	CH17
NC_000019.10	54071461	54911985	CH17
NC_000020.11	31051509	31107036	CH17
NC_000022.11	12027556	12225588	CH17
NC_000022.11	15154319	15282113	CH17
NC_000022.11	17356276	17490206	CH17
NC_000022.11	21855212	23114264	CH17
NC_000022.11	23956033	24184428	CH17
NC_000023.11	149479317	149992536	CH17
NC_000023.11	152585441	152819337	CH17
NC_000023.11	154068495	154691640	CH17
