# Supplementary material for: Evaluation of GRCh38 and de novo haploid genome assemblies demonstrates the enduring quality of the reference assembly
Source: Genome Res. 2017 May;27(5):849–64. doi: 10.1101/gr.213611.116 (PMC5411779; doi:10.1101/gr.213611.116)
Supplement: Supplemental Material [file supp_gr.213611.116_Supplemental_Worksheet_S3.xlsx]

## Sheet: GRCh37-GRCh38_alignment_stats
##GRCh37 vs GRCh38 assembly alignment report
##2016-07-05
##Overall stats
#Sequence	NoHit	UnGap_NoHit	Collapse(SP)	Expansion(SP Only)	Inversion	Mix
1	24008630	1038630	5023186	909511	2255871	25668
2	5027716	185716	2469792	98493	298865	77659
3	3225963	673	1802560	6038	0	0
4	3492898	50298	2167050	40981	0	0
5	3220087	50087	3373361	0	0	0
6	3759267	389267	2431310	10788	327025	0
7	3800949	515949	2770856	195503	630016	133738
8	3478471	53371	4213348	119972	50148	0
9	21083032	913032	2334430	2030191	2287001	36694
10	4222551	402551	1185428	1083100	1552781	8
11	3882417	205417	2115773	101043	418840	0
12	3376085	56085	1972028	2231	43246	0
13	19591546	11546	1001919	0	0	141896
14	19084744	24744	3460550	4134	635939	4742
15	20837257	527257	6612649	30610	868660	0
16	11498779	78779	4727472	0	6988	0
17	3401351	101351	6393160	36182	39735	243
18	3420103	100103	1338020	0	0	0
19	3326846	56846	2311626	78194	0	456
20	3520500	100500	649303	0	0	0
21	13024332	53139	1945033	0	492593	289
22	16414847	4847	1617387	32023	621647	2325
HSCHR11_RANDOM_CTG2	0	0	0	21285	0	0
HSCHR17_1_CTG5	100002	2	182687	1999	1976	0
HSCHR17_RANDOM_CTG1	16	16	0	29986	7496	0
HSCHR17_RANDOM_CTG2	257	257	0	32145	0	0
HSCHR17_RANDOM_CTG3	0	0	92734	0	174588	0
HSCHR17_RANDOM_CTG4	946	946	0	40055	0	0
HSCHR18_RANDOM_CTG1	417	417	0	0	3845	0
HSCHR19_RANDOM_CTG1	0	0	20575	0	0	0
HSCHR19_RANDOM_CTG2	0	0	133554	0	140926	0
HSCHR1_RANDOM_CTG12	433	433	0	86487	460576	0
HSCHR1_RANDOM_CTG5	200	200	0	106233	0	0
HSCHR21_RANDOM_CTG9	1070	1070	0	26391	221	0
HSCHR4_1_CTG9	0	0	0	3998	0	0
HSCHR4_RANDOM_CTG2	0	0	40081	34540	0	0
HSCHR4_RANDOM_CTG3	0	0	85720	0	0	0
HSCHR6_MHC_APD_CTG1	2301543	0	131430	5585	0	0
HSCHR6_MHC_COX_CTG1	100	100	9009	0	0	0
HSCHR6_MHC_DBB_CTG1	406094	0	0	5585	0	0
HSCHR6_MHC_MANN_CTG1	582522	0	30580	137288	0	0
HSCHR6_MHC_MCF_CTG1	1038440	0	0	5585	0	0
HSCHR6_MHC_QBL_CTG1	316659	0	55685	137288	0	0
HSCHR6_MHC_SSTO_CTG1	755116	100	0	14869	0	0
HSCHR7_RANDOM_CTG1	0	0	128964	0	0	0
HSCHR8_RANDOM_CTG1	13	13	0	8383	30518	0
HSCHR8_RANDOM_CTG4	102	102	0	37073	0	0
HSCHR9_RANDOM_CTG1	0	0	18641	0	0	0
HSCHR9_RANDOM_CTG2	0	0	0	0	0	0
HSCHR9_RANDOM_CTG4	472	472	0	186563	0	0
HSCHR9_RANDOM_CTG5	41	41	0	36107	0	0
HSCHRUN_RANDOM_CTG1	0	0	8872	0	0	0
HSCHRUN_RANDOM_CTG10	0	0	76736	0	0	0
HSCHRUN_RANDOM_CTG11	0	0	161349	0	0	0
HSCHRUN_RANDOM_CTG13	0	0	15594	0	0	0
HSCHRUN_RANDOM_CTG14	1223	1223	12348	158572	0	0
HSCHRUN_RANDOM_CTG15	253	253	0	180202	0	0
HSCHRUN_RANDOM_CTG16	0	0	120232	0	0	0
HSCHRUN_RANDOM_CTG17	0	0	1633	0	0	0
HSCHRUN_RANDOM_CTG19	0	0	0	0	0	0
HSCHRUN_RANDOM_CTG2	1	1	14553	0	0	0
HSCHRUN_RANDOM_CTG20	272	272	1978	118579	9463	0
HSCHRUN_RANDOM_CTG21	1259	1259	34503	35668	0	0
HSCHRUN_RANDOM_CTG22	200	200	12358	1800	0	0
HSCHRUN_RANDOM_CTG23	93	93	43169	0	43598	0
HSCHRUN_RANDOM_CTG24	0	0	22773	0	0	0
HSCHRUN_RANDOM_CTG25	0	0	39021	0	0	0
HSCHRUN_RANDOM_CTG26	0	0	30923	0	0	0
HSCHRUN_RANDOM_CTG27	0	0	39809	0	40531	0
HSCHRUN_RANDOM_CTG28	0	0	1805	0	0	0
HSCHRUN_RANDOM_CTG29	0	0	5663	0	0	0
HSCHRUN_RANDOM_CTG3	0	0	0	0	0	0
HSCHRUN_RANDOM_CTG30	0	0	0	27428	18439	0
HSCHRUN_RANDOM_CTG31	162	162	0	39777	0	0
HSCHRUN_RANDOM_CTG32	0	0	0	0	33824	0
HSCHRUN_RANDOM_CTG33	0	0	0	0	0	0
HSCHRUN_RANDOM_CTG34	0	0	27855	0	0	0
HSCHRUN_RANDOM_CTG35	0	0	0	43523	0	0
HSCHRUN_RANDOM_CTG36	0	0	0	0	0	0
HSCHRUN_RANDOM_CTG37	0	0	0	0	0	0
HSCHRUN_RANDOM_CTG38	0	0	0	0	0	0
HSCHRUN_RANDOM_CTG39	0	0	0	38154	0	0
HSCHRUN_RANDOM_CTG4	0	0	113610	0	0	0
HSCHRUN_RANDOM_CTG40	0	0	0	36422	0	0
HSCHRUN_RANDOM_CTG41	0	0	0	39786	0	0
HSCHRUN_RANDOM_CTG42	0	0	0	38502	0	0
HSCHRUN_RANDOM_CTG5	54	54	0	172491	0	0
HSCHRUN_RANDOM_CTG6	0	0	33062	0	0	0
HSCHRUN_RANDOM_CTG7	0	0	75152	0	172149	0
HSCHRUN_RANDOM_CTG9	0	0	12571	0	0	0
X	4203448	283448	660524	459950	502885	0
Y	33729393	109393	229652	30768	98295	0
total	240139172	5320715	64641646	7158061	12268685	423718

## Sheet: GRCh37-GRCh38_top_ten
##GRCh37 vs GRCh38 assembly alignment report
##2016-07-05
##Top ten by category.
##No Hit
#chr	start	stop	len
Y	28819361	58819361	30000000
1	121485434	142535435	21050001
15	0	20000000	20000000
13	0	19020001	19020001
14	0	19000001	19000001
9	47317679	65467679	18150000
22	0	16050001	16050001
16	35285801	46414577	11128776
21	0	9411193	9411193
10	39154935	42354935	3200000
##Ungap No Hit
#chr	start	stop	len
15	21398819	21885000	486181
9	92528796	92678797	150001
7	130154523	130254524	100001
1	144710724	144810725	100001
9	92343416	92443417	100001
6	167942073	168042073	100000
2	87668206	87720798	52592
12	95739	147379	51640
1	146164650	146214921	50271
9	44676384	44726646	50262
##SP
#chr	start	stop	len
6	127975947	128599742	623795
15	31195039	31802833	607794
1	243414194	244008646	594452
15	31803423	32385818	582395
14	94105625	94581938	476313
16	15664478	16097156	432678
14	93674575	94105232	430657
9	103711079	104121211	410132
19	55204403	55595686	391283
16	16722081	17092596	370515
##SP_only
#chr	start	stop	len
9	39445728	39663686	217958
9	41193215	41365793	172578
10	47892477	48055707	163230
HSCHRUN_RANDOM_CTG15	0	151599	151599
10	47174723	47323674	148951
9	43332039	43479693	147654
HSCHR6_MHC_MANN_CTG1	0	137288	137288
HSCHR6_MHC_QBL_CTG1	0	137288	137288
HSCHR9_RANDOM_CTG4	64850	187035	122185
X	52282636	52395914	113278
##Inv
#chr	start	stop	len
10	48105707	49002271	896564
15	22646193	23514853	868660
9	43996569	44636411	639842
14	19489121	20125060	635939
22	16074202	16695849	621647
1	145355630	145833118	477488
9	43479693	43902250	422557
11	51197154	51594205	397051
9	40475834	40838031	362197
HSCHR1_RANDOM_CTG12	186659	547496	360837
##Mix
#chr	start	stop	len
10	48105707	49002271	896564
15	22646193	23514853	868660
9	43996569	44636411	639842
14	19489121	20125060	635939
22	16074202	16695849	621647
1	145355630	145833118	477488
9	43479693	43902250	422557
11	51197154	51594205	397051
9	40475834	40838031	362197
HSCHR1_RANDOM_CTG12	186659	547496	360837

## Sheet: GRCh38-GRCh37_alignment_stats
##GRCh38 vs GRCh37 assembly alignment report
##2016-07-05
##Overall stats
#Sequence	NoHit	UnGap_NoHit	Collapse(SP)	Expansion(SP Only)	Inversion	Mix
1	22102544	3832044	1256290	2992516	2255790	464266
2	3768349	2244349	72692	509184	298857	20165
3	3288279	3117979	165848	217074	0	0
4	2564897	2213935	81216	25916	0	0
5	3822430	3649230	15851	20602	0	0
6	2966785	2346785	304054	478940	327045	0
7	3762741	3492741	375063	768103	630309	0
8	2257633	1887633	165442	572611	50164	30518
9	19140028	2705928	2062966	1085247	2286914	0
10	3400788	3230488	1232579	290093	1552777	0
11	3998346	3546452	122310	70916	418855	0
12	2765387	2642987	182451	43896	43247	0
13	18502029	2170829	0	865112	0	1524
14	18631736	2420236	26237	2283543	635939	0
15	20103237	2942937	44969	683312	868632	0
16	10784703	2364403	14639	688978	7165	6739
17	4815736	4504537	149051	2858828	39770	7493
18	5705662	5484762	0	3591	0	3845
19	2903793	2733393	34450	884070	0	0
20	3875109	3472960	3551	948136	0	0
21	9122750	2551550	203869	2289655	492591	37566
22	14214798	2591898	241376	1212367	621647	289179
HG142_HG150_NOVEL_TEST	9852	9852	0	191146	0	0
HG151_NOVEL_TEST	2694	2694	0	188715	0	0
HSCHR10_1_CTG1	38490	38490	0	140764	0	0
HSCHR10_1_CTG2	13916	13916	0	295886	0	0
HSCHR10_1_CTG3	3105	3105	0	178391	0	0
HSCHR10_1_CTG4	18397	18397	0	169918	0	0
HSCHR11_1_CTG1_1	5736	5736	0	148671	0	0
HSCHR11_1_CTG2	808	808	0	185361	0	0
HSCHR11_1_CTG3	4406	4406	0	63301	0	0
HSCHR11_1_CTG5	11042	11042	0	193017	0	0
HSCHR11_1_CTG6	8422	8422	0	168670	0	0
HSCHR11_1_CTG7	3325	3325	0	293570	0	0
HSCHR11_1_CTG8	4649	4649	0	205484	0	0
HSCHR11_2_CTG1	9329	9329	0	97382	0	0
HSCHR11_2_CTG1_1	3184	3184	0	211441	0	0
HSCHR11_3_CTG1	18765	18765	0	175354	0	0
HSCHR11_CTG1_UNLOCALIZED	1213	1213	0	99103	0	0
HSCHR12_1_CTG1	6383	6383	0	153412	0	0
HSCHR12_1_CTG2	6662	6662	0	114142	0	0
HSCHR12_1_CTG2_1	9336	9336	0	159842	0	0
HSCHR12_2_CTG2	11461	11461	0	396810	0	0
HSCHR12_2_CTG2_1	7052	7052	0	131603	0	0
HSCHR12_3_CTG2	10786	10786	0	561563	0	0
HSCHR12_3_CTG2_1	18	18	0	152856	0	0
HSCHR12_4_CTG2	3226	3226	0	234913	0	0
HSCHR12_4_CTG2_1	6065	6065	0	178254	0	0
HSCHR12_5_CTG2	1741	1741	0	38349	0	0
HSCHR12_5_CTG2_1	6121	6121	0	69940	0	0
HSCHR12_6_CTG2_1	0	0	0	119498	0	0
HSCHR12_7_CTG2_1	13252	13252	0	42882	0	0
HSCHR13_1_CTG1	1086	1086	0	36562	0	0
HSCHR13_1_CTG2	3984	3984	0	34426	141896	0
HSCHR13_1_CTG3	314	314	0	39176	0	0
HSCHR13_1_CTG4	4025	4025	0	34904	0	0
HSCHR13_1_CTG5	2572	2572	0	26027	0	0
HSCHR13_1_CTG6	2824	2824	0	33728	0	0
HSCHR14_1_CTG1	3673	3673	0	32053	0	0
HSCHR14_2_CTG1	7217	7217	0	34039	0	0
HSCHR14_3_CTG1	42275	42275	1418	1079926	0	0
HSCHR14_7_CTG1	4757	4757	0	33377	0	0
HSCHR14_CTG1_UNLOCALIZED	1	1	36420	0	0	0
HSCHR14_CTG2_UNLOCALIZED	0	0	0	0	0	0
HSCHR14_CTG3_UNLOCALIZED	24332	24332	0	169297	421	0
HSCHR14_CTG4_UNLOCALIZED	0	0	0	0	0	0
HSCHR14_CTG5_UNLOCALIZED	3347	3347	0	30626	0	0
HSCHR14_CTG6_UNLOCALIZED	6520	6520	0	33035	0	0
HSCHR14_CTG7_UNLOCALIZED	10055	10055	0	162755	0	0
HSCHR14_CTG8_UNLOCALIZED	4056	4056	0	34941	4742	0
HSCHR15_1_CTG1	319	319	0	478680	0	0
HSCHR15_1_CTG3	3802	3802	0	323580	0	0
HSCHR15_1_CTG8	2669	2669	0	293858	0	0
HSCHR15_2_CTG3	3727	3727	0	192657	0	0
HSCHR15_2_CTG8	12523	12523	0	376250	0	0
HSCHR15_3_CTG3	1009	1009	0	262045	0	0
HSCHR15_3_CTG8	4611	4611	0	240306	0	0
HSCHR15_4_CTG8	424529	20522	0	4736885	0	0
HSCHR15_5_CTG8	0	0	0	14561	0	0
HSCHR15_RANDOM_CTG1	791	791	0	395745	0	0
HSCHR16_1_CTG1	13630	13630	0	2646070	0	0
HSCHR16_1_CTG3_1	268	268	0	192194	0	0
HSCHR16_2_CTG3_1	5397	5397	0	84275	0	0
HSCHR16_3_CTG1	3034	3034	0	229823	0	0
HSCHR16_4_CTG1	2032	2032	0	61950	0	0
HSCHR16_CTG2	5992	5992	0	128201	0	0
HSCHR16_RANDOM_CTG1	477385	177385	8309	1387065	0	0
HSCHR17_10_CTG4	180	180	0	157888	0	0
HSCHR17_1_CTG1	47801	47801	0	327890	0	0
HSCHR17_1_CTG2	0	0	0	196688	0	0
HSCHR17_1_CTG4	692	692	0	132459	0	0
HSCHR17_1_CTG5	50198	198	0	243529	0	0
HSCHR17_1_CTG9	5275	5275	0	173402	244	0
HSCHR17_2_CTG1	6908	6908	0	130813	0	0
HSCHR17_2_CTG2	7620	7620	0	383589	0	0
HSCHR17_2_CTG4	7118	7118	0	216877	0	0
HSCHR17_2_CTG5	3817	3817	39803	1328494	1975	0
HSCHR17_3_CTG2	1745	1745	0	155354	0	0
HSCHR17_3_CTG4	296	296	0	89923	0	0
HSCHR17_4_CTG4	1502	1502	0	276629	0	0
HSCHR17_5_CTG4	502	502	0	69843	0	0
HSCHR17_6_CTG4	502	502	0	87568	0	0
HSCHR17_7_CTG4	6514	6514	0	792528	0	0
HSCHR17_8_CTG4	1199	1199	0	234628	0	0
HSCHR17_9_CTG4	6579	6579	0	102184	0	0
HSCHR17_RANDOM_CTG3	427	427	0	35778	149386	0
HSCHR17_RANDOM_CTG4	157211	145894	0	123628	0	0
HSCHR17_RANDOM_CTG5	106473	100504	0	6078	0	0
HSCHR18_1_CTG1_1	6195	6195	0	283636	0	0
HSCHR18_1_CTG2	6861	6861	0	97691	0	0
HSCHR18_1_CTG2_1	11531	11531	0	156419	0	0
HSCHR18_2_CTG1_1	6093	6093	0	158696	0	0
HSCHR18_2_CTG2	69466	19466	0	128812	0	0
HSCHR18_2_CTG2_1	1375	1375	0	158172	0	0
HSCHR18_3_CTG2_1	2296	2296	0	165703	0	0
HSCHR18_4_CTG1_1	6824	6824	0	104913	0	0
HSCHR18_ALT21_CTG2_1	2175	2175	0	171886	0	0
HSCHR18_ALT2_CTG2_1	9885	9885	0	147825	0	0
HSCHR19KIR_ABC08_A1_HAP_CTG3_1	22	22	0	190910	0	0
HSCHR19KIR_ABC08_AB_HAP_C_P_CTG3_1	878	878	0	122233	0	0
HSCHR19KIR_ABC08_AB_HAP_T_P_CTG3_1	780	780	0	169921	0	0
HSCHR19KIR_FH05_A_HAP_CTG3_1	316	316	0	197689	0	0
HSCHR19KIR_FH05_B_HAP_CTG3_1	3776	3776	0	278448	0	0
HSCHR19KIR_FH06_A_HAP_CTG3_1	0	0	0	187935	0	0
HSCHR19KIR_FH06_BA1_HAP_CTG3_1	2710	2710	0	186642	0	0
HSCHR19KIR_FH08_A_HAP_CTG3_1	2	2	0	186201	0	0
HSCHR19KIR_FH08_BAX_HAP_CTG3_1	5578	5578	0	180397	14798	0
HSCHR19KIR_FH13_A_HAP_CTG3_1	1663	1663	0	168485	0	0
HSCHR19KIR_FH13_BA2_HAP_CTG3_1	3991	3991	0	211741	0	0
HSCHR19KIR_FH15_A_HAP_CTG3_1	900	900	0	169637	0	0
HSCHR19KIR_FH15_B_HAP_CTG3_1	2934	2934	0	245873	0	0
HSCHR19KIR_G085_A_HAP_CTG3_1	1182	1182	0	169217	0	0
HSCHR19KIR_G085_BA1_HAP_CTG3_1	2059	2059	0	154994	0	0
HSCHR19KIR_G248_A_HAP_CTG3_1	1087	1087	0	169940	0	0
HSCHR19KIR_G248_BA2_HAP_CTG3_1	4331	4331	0	199908	0	0
HSCHR19KIR_GRC212_AB_HAP_CTG3_1	2638	2638	0	206418	456	0
HSCHR19KIR_GRC212_BA1_HAP_CTG3_1	1153	1153	0	154379	0	0
HSCHR19KIR_LUCE_A_HAP_CTG3_1	1045	1045	0	169653	0	0
HSCHR19KIR_LUCE_BDEL_HAP_CTG3_1	895	895	0	104809	78795	0
HSCHR19KIR_RP5_B_HAP_CTG3_1	1701	1701	0	161388	14292	0
HSCHR19KIR_RSH_A_HAP_CTG3_1	1293	1293	0	144130	25257	0
HSCHR19KIR_RSH_BA2_HAP_CTG3_1	1851	1851	0	195598	7745	0
HSCHR19KIR_T7526_A_HAP_CTG3_1	779	779	0	169886	0	0
HSCHR19KIR_T7526_BDEL_HAP_CTG3_1	1375	1375	0	183141	0	0
HSCHR19LRC_COX1_CTG3_1	107975	2975	0	879741	0	0
HSCHR19LRC_COX2_CTG3_1	69123	3123	0	660397	0	0
HSCHR19LRC_LRC_I_CTG3_1	608827	1827	0	260257	0	0
HSCHR19LRC_LRC_J_CTG3_1	658001	2001	0	433840	0	0
HSCHR19LRC_LRC_S_CTG3_1	648414	414	0	417976	0	0
HSCHR19LRC_LRC_T_CTG3_1	536414	414	0	466269	0	0
HSCHR19LRC_PGF1_CTG3_1	7227	2227	0	979873	0	0
HSCHR19LRC_PGF2_CTG3_1	122366	2366	0	657780	0	0
HSCHR19_1_CTG2	4296	4296	0	381361	0	0
HSCHR19_1_CTG3_1	7206	7206	0	148658	0	0
HSCHR19_2_CTG2	407	407	0	169815	0	0
HSCHR19_2_CTG3_1	935	935	0	42221	0	0
HSCHR19_3_CTG2	1880	1880	0	185855	289	0
HSCHR19_3_CTG3_1	9319	9319	0	224443	0	0
HSCHR19_4_CTG2	3111	3111	0	49858	0	0
HSCHR19_4_CTG3_1	868	868	0	367553	0	0
HSCHR19_5_CTG2	4745	4745	0	56989	0	0
HSCHR1_1_CTG11	6632	6632	0	102896	0	0
HSCHR1_1_CTG3	52550	2550	0	301894	0	0
HSCHR1_1_CTG31	361	361	0	182078	0	0
HSCHR1_1_CTG32_1	3809	3809	0	421792	0	0
HSCHR1_2_CTG3	319	319	0	170700	18930	0
HSCHR1_2_CTG31	1445	1445	0	108823	0	0
HSCHR1_2_CTG32_1	7594	7594	0	158240	0	0
HSCHR1_3_CTG31	11819	11819	0	354761	0	0
HSCHR1_3_CTG32_1	5300	5300	0	906358	0	0
HSCHR1_4_CTG31	16173	16173	0	121419	0	0
HSCHR1_4_CTG32_1	2452	2452	0	47806	0	0
HSCHR1_ALT2_1_CTG32_1	5083	5083	0	156746	0	0
HSCHR1_CTG1_UNLOCALIZED	0	0	0	0	0	0
HSCHR1_CTG2_UNLOCALIZED	4749	4749	0	27283	0	0
HSCHR1_CTG3_UNLOCALIZED	2797	2797	0	104996	19769	0
HSCHR1_CTG4_UNLOCALIZED	891	891	0	65969	0	0
HSCHR1_CTG5_UNLOCALIZED	2	2	0	40174	0	0
HSCHR1_CTG6_UNLOCALIZED	1013	1013	0	41197	0	0
HSCHR1_CTG7_UNLOCALIZED	5260	5260	0	170476	0	0
HSCHR1_CTG8_UNLOCALIZED	1	1	0	40744	0	0
HSCHR1_CTG9_UNLOCALIZED	1001	1001	0	40716	0	0
HSCHR20_1_CTG1	7230	7230	0	121156	0	0
HSCHR20_1_CTG2	1805	1805	0	116969	0	0
HSCHR20_1_CTG3	4770	4770	0	178663	0	0
HSCHR20_1_CTG4	3250	3250	0	55411	0	0
HSCHR21_1_CTG1_1	13305	13305	0	50612	0	0
HSCHR21_2_CTG1_1	8792	8792	0	192405	0	0
HSCHR21_3_CTG1_1	7596	7596	0	67057	0	0
HSCHR21_4_CTG1_1	10261	10261	0	106428	0	0
HSCHR21_5_CTG2	3153	3153	0	79539	0	0
HSCHR21_6_CTG1_1	10005	10005	0	133395	0	0
HSCHR21_8_CTG1_1	5650	5650	0	161093	0	0
HSCHR22_1_CTG1	679	679	0	121679	0	0
HSCHR22_1_CTG2	428	428	0	96496	0	0
HSCHR22_1_CTG3	14889	14889	0	245025	0	0
HSCHR22_1_CTG4	8168	8168	0	255498	0	0
HSCHR22_1_CTG5	3458	3458	0	97503	0	0
HSCHR22_1_CTG6	23150	23150	0	163112	0	0
HSCHR22_1_CTG7	0	0	0	192394	0	0
HSCHR22_2_CTG1	0	0	0	74013	0	0
HSCHR22_3_CTG1	0	0	0	141426	0	0
HSCHR22_UNLOCALIZED_CTG1	1736	1736	9659	139359	2312	0
HSCHR22_UNLOCALIZED_CTG2	2657	2657	0	38886	0	0
HSCHR22_UNLOCALIZED_CTG3	7345	7345	0	172427	0	0
HSCHR22_UNLOCALIZED_CTG4	0	0	0	165050	0	0
HSCHR22_UNLOCALIZED_CTG5	5855	5855	0	36956	0	0
HSCHR22_UNLOCALIZED_CTG6	137032	124749	0	44888	0	0
HSCHR22_UNLOCALIZED_CTG7	58057	57646	0	45781	0	0
HSCHR22_UNLOCALIZED_CTG8	54239	50684	0	45136	0	0
HSCHR22_UNLOCALIZED_CTG9	73985	72423	0	0	0	0
HSCHR2_1_CTG1	3231	3231	0	117385	0	0
HSCHR2_1_CTG15	2420	2420	0	159158	0	0
HSCHR2_1_CTG5	6114	6114	0	137276	0	0
HSCHR2_1_CTG7	1052	1052	0	107294	0	0
HSCHR2_1_CTG7_2	12834	12834	0	110987	0	0
HSCHR2_2_CTG1	11538	11538	0	114460	0	0
HSCHR2_2_CTG15	2049	2049	0	159169	0	0
HSCHR2_2_CTG7	28833	28833	19769	97719	73933	0
HSCHR2_2_CTG7_2	6102	6102	0	90029	0	0
HSCHR2_3_CTG1	948	948	1043	66035	0	0
HSCHR2_3_CTG15	4733	4733	0	169245	0	0
HSCHR2_3_CTG7_2	1429	1429	0	108670	0	0
HSCHR2_4_CTG1	4466	4466	0	219159	0	0
HSCHR2_4_CTG7_2	3637	3637	0	106758	0	0
HSCHR2_5_CTG7_2	6166	6166	0	131853	0	0
HSCHR2_RANDOM_CTG1	161471	161471	0	0	0	0
HSCHR2_RANDOM_CTG2	153799	153799	0	0	0	0
HSCHR3UN_CTG2	0	0	0	0	0	0
HSCHR3_1_CTG1	2120	2120	0	171031	0	0
HSCHR3_1_CTG2_1	10674	10674	0	169997	0	0
HSCHR3_1_CTG3	4603	4603	0	200709	0	0
HSCHR3_2_CTG2_1	3171	3171	0	170478	0	0
HSCHR3_2_CTG3	2019	2019	0	160410	0	0
HSCHR3_3_CTG1	4858	4858	0	104329	0	0
HSCHR3_3_CTG2_1	4881	4881	0	243371	0	0
HSCHR3_3_CTG3	1746	1746	0	161150	0	0
HSCHR3_4_CTG2_1	376	376	0	223732	0	0
HSCHR3_4_CTG3	8695	8695	0	157845	0	0
HSCHR3_5_CTG2_1	4973	4973	0	108061	0	0
HSCHR3_5_CTG3	2198	2198	0	161260	0	0
HSCHR3_6_CTG3	1721	1721	0	195630	0	0
HSCHR3_7_CTG3	2135	2135	0	162035	0	0
HSCHR3_8_CTG3	3460	3460	0	162147	0	0
HSCHR3_9_CTG3	59	59	0	184345	0	0
HSCHR4_1_CTG12	12910	12910	0	151626	0	0
HSCHR4_1_CTG4	7126	7126	0	213120	0	0
HSCHR4_1_CTG6	8	8	0	376179	0	0
HSCHR4_1_CTG8_1	4589	4589	0	107354	0	0
HSCHR4_1_CTG9	0	0	0	0	0	0
HSCHR4_2_CTG12	138	138	0	119774	0	0
HSCHR4_3_CTG12	6343	6343	0	237753	0	0
HSCHR4_4_CTG12	6124	6124	0	152841	0	0
HSCHR4_5_CTG12	745	745	0	205199	0	0
HSCHR4_6_CTG12	9499	9499	0	330813	0	0
HSCHR4_7_CTG12	18341	18341	0	537458	0	0
HSCHR4_RANDOM_CTG4	1	1	0	14121	0	0
HSCHR5_1_CTG1	20154	20154	0	62574	0	0
HSCHR5_1_CTG1_1	51241	1241	0	1093177	0	0
HSCHR5_1_CTG5	5480	5480	0	167979	0	0
HSCHR5_2_CTG1	9228	9228	0	217624	0	0
HSCHR5_2_CTG1_1	102174	2174	0	1510754	0	0
HSCHR5_2_CTG5	2232	2232	0	129660	0	0
HSCHR5_3_CTG1	5419	5419	0	190291	0	0
HSCHR5_3_CTG1_1	14182	14182	0	87059	0	0
HSCHR5_3_CTG5	2106	2106	0	128851	0	0
HSCHR5_4_CTG1	0	0	0	179043	0	0
HSCHR5_4_CTG1_1	9131	9131	0	163577	0	0
HSCHR5_5_CTG1	2178	2178	0	123958	0	0
HSCHR5_6_CTG1	2253	2253	0	162305	0	0
HSCHR5_RANDOM_CTG1	0	0	0	0	0	0
HSCHR6_1_CTG2	27839	27839	0	96897	0	0
HSCHR6_1_CTG3	26939	26939	0	158884	0	0
HSCHR6_1_CTG4	42458	42458	0	155078	0	0
HSCHR6_1_CTG5	10352	10352	0	261430	0	0
HSCHR6_1_CTG6	8586	8586	0	143562	0	0
HSCHR6_1_CTG7	6644	6644	0	169164	0	0
HSCHR6_1_CTG8	4701	4701	0	865779	0	0
HSCHR6_1_CTG9	10289	10289	0	64716	0	0
HSCHR6_8_CTG1	7918	7918	0	68834	0	0
HSCHR6_MHC_APD_CTG1	2301818	275	0	146640	0	0
HSCHR6_MHC_COX_CTG1	0	0	0	0	0	0
HSCHR6_MHC_DBB_CTG1	406094	0	0	0	0	0
HSCHR6_MHC_MANN_CTG1	582795	273	0	131395	0	0
HSCHR6_MHC_MCF_CTG1	1038440	0	0	0	0	0
HSCHR6_MHC_QBL_CTG1	316659	0	0	40457	0	0
HSCHR6_MHC_SSTO_CTG1	755016	0	0	15666	0	0
HSCHR7_1_CTG1	4176	4176	0	153776	0	0
HSCHR7_1_CTG4_4	1597	1597	0	156569	0	0
HSCHR7_1_CTG6	5991	5991	0	113192	0	0
HSCHR7_1_CTG7	1606	1606	0	208382	0	0
HSCHR7_2_CTG1	2138	2138	0	188731	0	0
HSCHR7_2_CTG4_4	146	146	0	209440	0	0
HSCHR7_2_CTG6	122250	122250	0	689924	133738	0
HSCHR7_2_CTG7	6796	6796	0	119638	0	0
HSCHR7_3_CTG6	2258	2258	0	269197	0	0
HSCHR8_1_CTG1	6484	6484	0	285952	0	0
HSCHR8_1_CTG6	1260	1260	0	140552	0	0
HSCHR8_1_CTG7	3796	3796	0	370619	0	0
HSCHR8_2_CTG1	3104	3104	0	279632	0	0
HSCHR8_2_CTG7	6736	6736	0	125508	0	0
HSCHR8_3_CTG1	2	2	0	300228	0	0
HSCHR8_3_CTG7	3469	3469	0	302372	0	0
HSCHR8_4_CTG1	3373	3373	0	142233	0	0
HSCHR8_4_CTG7	4247	4247	0	154736	0	0
HSCHR8_5_CTG1	8406	8406	0	310281	0	0
HSCHR8_5_CTG7	6243	6243	0	127292	0	0
HSCHR8_6_CTG1	1286	1286	0	135673	0	0
HSCHR8_6_CTG7	3398	3398	0	33242	0	0
HSCHR8_7_CTG1	1641	1641	0	227641	0	0
HSCHR8_8_CTG1	4176	4176	0	493965	0	0
HSCHR8_9_CTG1	387	387	0	624105	0	0
HSCHR9_1_CTG1	5	5	0	162983	0	0
HSCHR9_1_CTG2	0	0	0	71551	0	0
HSCHR9_1_CTG3	6087	6087	0	165199	0	0
HSCHR9_1_CTG4	11381	11381	0	48651	0	0
HSCHR9_1_CTG5	9566	9566	0	429516	0	0
HSCHR9_UNLOCALIZED_CTG1	2064	2064	0	37998	0	0
HSCHR9_UNLOCALIZED_CTG2	2040	2040	0	34007	0	0
HSCHR9_UNLOCALIZED_CTG3	887	887	0	174003	1955	0
HSCHR9_UNLOCALIZED_CTG4	5936	5936	0	33114	0	0
HSCHRUN_RANDOM_100	2274	2274	0	0	0	0
HSCHRUN_RANDOM_101	2165	2165	0	0	0	0
HSCHRUN_RANDOM_102	1942	1942	0	0	0	0
HSCHRUN_RANDOM_103	1472	1472	0	0	0	0
HSCHRUN_RANDOM_104	21476	6208	0	0	0	0
HSCHRUN_RANDOM_105	4416	4416	0	0	0	0
HSCHRUN_RANDOM_106	1201	1201	0	0	0	0
HSCHRUN_RANDOM_107	1444	1444	0	0	0	0
HSCHRUN_RANDOM_108	2276	2276	0	0	0	0
HSCHRUN_RANDOM_109	998	998	0	0	0	0
HSCHRUN_RANDOM_110	12399	2966	0	0	0	0
HSCHRUN_RANDOM_111	37690	3624	0	0	0	0
HSCHRUN_RANDOM_112	1179	1179	0	0	0	0
HSCHRUN_RANDOM_113	2646	2646	0	0	0	0
HSCHRUN_RANDOM_114	2489	2489	0	0	0	0
HSCHRUN_RANDOM_115	1029	1029	0	0	0	0
HSCHRUN_RANDOM_116	2145	2145	0	0	0	0
HSCHRUN_RANDOM_117	2321	2321	0	0	0	0
HSCHRUN_RANDOM_118	2140	2140	0	0	0	0
HSCHRUN_RANDOM_119	2043	2043	0	0	0	0
HSCHRUN_RANDOM_120	1445	1445	0	0	0	0
HSCHRUN_RANDOM_121	981	981	0	0	0	0
HSCHRUN_RANDOM_122	1884	1884	0	0	0	0
HSCHRUN_RANDOM_123	1361	1361	0	0	0	0
HSCHRUN_RANDOM_124	264596	243564	0	127465	0	0
HSCHRUN_RANDOM_125	1233	1233	0	0	0	0
HSCHRUN_RANDOM_126	1774	1774	0	0	0	0
HSCHRUN_RANDOM_127	3920	3920	0	0	0	0
HSCHRUN_RANDOM_128	92983	92902	0	0	0	0
HSCHRUN_RANDOM_129	112505	84011	0	0	0	0
HSCHRUN_RANDOM_130	4055	4055	0	0	0	0
HSCHRUN_RANDOM_131	2415	2415	0	0	0	0
HSCHRUN_RANDOM_132	2318	2318	0	0	0	0
HSCHRUN_RANDOM_133	2186	2186	0	0	0	0
HSCHRUN_RANDOM_134	1951	1951	0	0	0	0
HSCHRUN_RANDOM_135	1300	1300	0	0	0	0
HSCHRUN_RANDOM_136	22689	22689	0	0	0	0
HSCHRUN_RANDOM_137	138126	137668	0	0	0	0
HSCHRUN_RANDOM_138	5674	5674	0	0	0	0
HSCHRUN_RANDOM_139	8127	8127	0	0	0	0
HSCHRUN_RANDOM_140	6361	6361	0	0	0	0
HSCHRUN_RANDOM_141	5353	5353	0	0	0	0
HSCHRUN_RANDOM_142	3253	3253	0	0	0	0
HSCHRUN_RANDOM_143	1899	1899	0	0	0	0
HSCHRUN_RANDOM_144	2983	2983	0	0	0	0
HSCHRUN_RANDOM_145	2168	2168	0	0	0	0
HSCHRUN_RANDOM_146	993	993	0	0	0	0
HSCHRUN_RANDOM_147	91309	63627	0	0	0	0
HSCHRUN_RANDOM_148	1202	1202	0	0	0	0
HSCHRUN_RANDOM_149	1599	1599	0	0	0	0
HSCHRUN_RANDOM_154	1400	1400	0	0	0	0
HSCHRUN_RANDOM_155	2969	2969	0	0	0	0
HSCHRUN_RANDOM_156	1553	1553	0	0	0	0
HSCHRUN_RANDOM_157	5095	5095	0	1951	0	0
HSCHRUN_RANDOM_158	25794	25794	0	5239	0	0
HSCHRUN_RANDOM_159	44474	35396	0	0	0	0
HSCHRUN_RANDOM_160	4685	4685	0	0	0	0
HSCHRUN_RANDOM_161	4513	4513	0	0	0	0
HSCHRUN_RANDOM_162	6504	6504	0	0	0	0
HSCHRUN_RANDOM_163	6158	6158	0	0	0	0
HSCHRUN_RANDOM_164	3041	3041	0	0	0	0
HSCHRUN_RANDOM_165	5796	5796	0	0	0	0
HSCHRUN_RANDOM_166	223	223	0	1429	0	0
HSCHRUN_RANDOM_167	1040	1040	0	0	0	0
HSCHRUN_RANDOM_168	1368	1368	0	0	0	0
HSCHRUN_RANDOM_169	2699	2699	0	0	0	0
HSCHRUN_RANDOM_170	1048	1048	0	0	0	0
HSCHRUN_RANDOM_171	1428	1428	0	0	0	0
HSCHRUN_RANDOM_172	1428	1428	0	0	0	0
HSCHRUN_RANDOM_173	1026	1026	0	0	0	0
HSCHRUN_RANDOM_174	1121	1121	0	0	0	0
HSCHRUN_RANDOM_175	1803	1803	0	0	0	0
HSCHRUN_RANDOM_176	2855	2855	0	0	0	0
HSCHRUN_RANDOM_177	3530	3530	0	0	0	0
HSCHRUN_RANDOM_178	8320	8320	0	0	0	0
HSCHRUN_RANDOM_179	1048	1048	0	0	0	0
HSCHRUN_RANDOM_180	1045	1045	0	0	0	0
HSCHRUN_RANDOM_181	1298	1298	0	0	0	0
HSCHRUN_RANDOM_182	2387	2387	0	0	0	0
HSCHRUN_RANDOM_183	1537	1537	0	0	0	0
HSCHRUN_RANDOM_184	1143	1143	0	0	0	0
HSCHRUN_RANDOM_185	1880	1880	0	0	0	0
HSCHRUN_RANDOM_186	1216	1216	0	0	0	0
HSCHRUN_RANDOM_187	970	970	0	0	0	0
HSCHRUN_RANDOM_188	1788	1788	0	0	0	0
HSCHRUN_RANDOM_189	1484	1484	0	0	0	0
HSCHRUN_RANDOM_190	1750	1750	0	0	0	0
HSCHRUN_RANDOM_191	1308	1308	0	0	0	0
HSCHRUN_RANDOM_192	1658	1658	0	0	0	0
HSCHRUN_RANDOM_193	971	971	0	0	0	0
HSCHRUN_RANDOM_194	1930	1930	0	0	0	0
HSCHRUN_RANDOM_195	990	990	0	0	0	0
HSCHRUN_RANDOM_196	4215	4215	0	0	0	0
HSCHRUN_RANDOM_197	1136	1136	0	0	0	0
HSCHRUN_RANDOM_198	2656	2656	0	0	0	0
HSCHRUN_RANDOM_199	1650	1650	0	0	0	0
HSCHRUN_RANDOM_200	1451	1451	0	0	0	0
HSCHRUN_RANDOM_201	2378	2378	0	0	0	0
HSCHRUN_RANDOM_202	2805	2805	0	0	0	0
HSCHRUN_RANDOM_203	5740	5740	0	2252	0	0
HSCHRUN_RANDOM_204	5385	5385	0	2257	0	0
HSCHRUN_RANDOM_CTG1	0	0	0	0	0	0
HSCHRUN_RANDOM_CTG10	0	0	0	0	0	0
HSCHRUN_RANDOM_CTG11	0	0	0	0	0	0
HSCHRUN_RANDOM_CTG16	0	0	6245	0	0	0
HSCHRUN_RANDOM_CTG17	8913	7126	0	148519	0	0
HSCHRUN_RANDOM_CTG19	0	0	0	0	0	0
HSCHRUN_RANDOM_CTG2	0	0	31578	0	0	0
HSCHRUN_RANDOM_CTG20	1085	1085	0	209573	0	0
HSCHRUN_RANDOM_CTG21	2521	2521	0	165951	0	0
HSCHRUN_RANDOM_CTG22	306	306	0	41585	0	0
HSCHRUN_RANDOM_CTG23	3938	3938	0	62548	0	0
HSCHRUN_RANDOM_CTG24	118502	118502	0	80233	0	0
HSCHRUN_RANDOM_CTG25	6990	6990	0	76859	9472	0
HSCHRUN_RANDOM_CTG26	4911	4911	0	153848	0	0
HSCHRUN_RANDOM_CTG27	6319	6319	0	142531	0	0
HSCHRUN_RANDOM_CTG28	2516	2516	0	148226	0	0
HSCHRUN_RANDOM_CTG29	27745	27745	0	0	0	0
HSCHRUN_RANDOM_CTG30	4390	4390	0	58554	0	0
HSCHRUN_RANDOM_CTG33	31	31	0	40160	0	0
HSCHRUN_RANDOM_CTG34	3423	3423	0	33300	0	0
HSCHRUN_RANDOM_CTG35	79590	79524	0	0	0	0
HSCHRUN_RANDOM_CTG36	71251	61851	0	0	0	0
HSCHRUN_RANDOM_CTG4	0	0	0	0	0	0
HSCHRUN_RANDOM_CTG42	0	0	0	0	0	0
HSCHRUN_RANDOM_CTG6	4314	4078	0	0	0	0
HSCHRUN_RANDOM_CTG9	0	0	0	0	0	0
HSCHRX_1_CTG3	9293	9293	0	275576	0	0
HSCHRX_2_CTG12	12355	12355	0	131851	0	0
HSCHRX_2_CTG3	1129	1129	0	272880	0	0
HSCHRY_RANDOM_CTG1	37240	37240	0	0	0	0
MT	0	0	0	0	0	0
X	5190040	4512029	476008	265262	502715	0
Y	31569929	1000280	30846	44285	98295	0
total	232590413	75653590	7416002	87242907	11831117	861295

## Sheet: GRCh38-GRCh37_top_ten
##GRCh38 vs GRCh37 assembly alignment report
##2016-07-05
##Top ten by category.
##No Hit
#chr	start	stop	len
Y	26673214	56673214	30000000
15	0	19794747	19794747
13	0	18171249	18171249
1	125171347	143260363	18089016
9	43331857	60518558	17186701
14	0	16023131	16023131
22	0	10510000	10510000
16	36251135	46380686	10129551
18	15410899	20930937	5520038
21	0	5010001	5010001
##Ungap No Hit
#chr	start	stop	len
18	15410899	20930937	5520038
17	22763679	26716619	3952940
X	58555579	62462542	3906963
11	50821348	54525074	3703726
1	121866364	125063396	3197032
5	47102683	50109807	3007124
19	24448980	27240874	2791894
7	58119534	60878235	2758701
12	34798337	37419036	2620699
10	39202524	41693521	2490997
##SP
#chr	start	stop	len
9	39445729	39663700	217971
10	17735713	17932651	196938
10	46647437	46835345	187908
10	46838577	47023806	185229
9	42309798	42480154	170356
9	41521771	41675713	153942
12	132954478	133106076	151598
X	52360116	52510614	150498
10	47484738	47633654	148916
6	28728826	28866110	137284
##SP_only
#chr	start	stop	len
HSCHR15_4_CTG8	3188568	4378738	1190170
HSCHR16_1_CTG1	2031618	2659700	628082
HSCHR1_3_CTG32_1	263000	857442	594442
HSCHR16_1_CTG1	1228613	1748353	519740
14	93639279	94115592	476313
14	93208229	93638886	430657
HSCHR9_1_CTG5	0	410163	410163
HSCHR19LRC_PGF1_CTG3_1	585511	987100	401589
HSCHR5_1_CTG1_1	744069	1144418	400349
17	37121610	37514648	393038
##Inv
#chr	start	stop	len
9	41912138	43076349	1164211
10	46526688	47633654	1106966
15	22358242	23226874	868632
14	18862645	19498584	635939
22	15282113	15903760	621647
1	145601945	146074657	472712
11	54525074	54943929	418855
9	66854809	67217006	362197
1	206009146	206268643	259497
21	10580989	10814560	233571
##Mix
#chr	start	stop	len
9	41912138	43076349	1164211
10	46526688	47633654	1106966
15	22358242	23226874	868632
14	18862645	19498584	635939
22	15282113	15903760	621647
1	145601945	146074657	472712
11	54525074	54943929	418855
9	66854809	67217006	362197
1	206009146	206268643	259497
21	10580989	10814560	233571

## Sheet: GRCh37p-GRCh38p_alignment_stats
##GRCh37 Primary Assembly vs GRCh38 Primary Assembly assembly alignment report
##2016-07-07
##Overall stats
#Sequence	NoHit	UnGap_NoHit	Collapse(SP)	Expansion(SP Only)	Inversion	Mix
1	24008639	1038639	2378089	950153	2223172	6738
2	5030786	188786	871389	111126	344487	26658
3	3225963	673	129001	6038	0	0
4	3492734	50134	405462	40981	0	0
5	3220087	50087	88236	0	0	0
6	3759267	389267	478445	10788	327025	0
7	3801488	516488	590223	202601	756503	0
8	3479671	54571	164108	119972	144906	0
9	21082286	912286	1463408	2041263	2290276	36172
10	4222551	402551	445710	1083100	1552781	8
11	3882562	205562	210035	101043	418840	0
12	3377087	57087	17462	8570	43246	0
13	19591546	11546	57298	0	0	0
14	19085077	25077	327016	7849	635939	4742
15	20838287	528287	744446	261467	868660	0
16	11498779	78779	1554324	0	6988	0
17	3408969	108969	334757	115888	39735	0
18	3420103	100103	57665	0	0	0
19	3333353	63353	3552	81119	0	0
20	3520500	100500	179034	0	0	0
21	13024621	53428	1154564	0	492593	0
22	16451663	41663	335032	49515	621647	2325
HSCHR11_RANDOM_CTG2	0	0	0	21285	0	0
HSCHR17_RANDOM_CTG1	16	16	0	29986	7496	0
HSCHR17_RANDOM_CTG2	257	257	0	32145	0	0
HSCHR17_RANDOM_CTG3	0	0	92734	0	174588	0
HSCHR17_RANDOM_CTG4	946	946	0	40055	0	0
HSCHR18_RANDOM_CTG1	417	417	0	0	3845	0
HSCHR19_RANDOM_CTG1	0	0	20575	0	0	0
HSCHR19_RANDOM_CTG2	13275	13275	0	145894	0	0
HSCHR1_RANDOM_CTG12	433	433	0	86487	460576	0
HSCHR1_RANDOM_CTG5	200	200	0	106233	0	0
HSCHR21_RANDOM_CTG9	1070	1070	0	26391	221	0
HSCHR4_RANDOM_CTG2	0	0	40112	34540	0	0
HSCHR4_RANDOM_CTG3	0	0	85720	0	0	0
HSCHR7_RANDOM_CTG1	0	0	128964	0	0	0
HSCHR8_RANDOM_CTG1	13	13	0	8383	30518	0
HSCHR8_RANDOM_CTG4	102	102	0	37073	0	0
HSCHR9_RANDOM_CTG1	0	0	18641	0	0	0
HSCHR9_RANDOM_CTG2	0	0	0	0	0	0
HSCHR9_RANDOM_CTG4	472	472	0	186563	0	0
HSCHR9_RANDOM_CTG5	41	41	0	36107	0	0
HSCHRUN_RANDOM_CTG1	0	0	8872	0	0	0
HSCHRUN_RANDOM_CTG10	0	0	76736	0	0	0
HSCHRUN_RANDOM_CTG11	0	0	161349	0	0	0
HSCHRUN_RANDOM_CTG13	0	0	15594	0	0	0
HSCHRUN_RANDOM_CTG14	1223	1223	12348	158572	0	0
HSCHRUN_RANDOM_CTG15	253	253	0	180202	0	0
HSCHRUN_RANDOM_CTG16	0	0	120232	0	0	0
HSCHRUN_RANDOM_CTG17	0	0	1633	0	0	0
HSCHRUN_RANDOM_CTG19	0	0	0	0	0	0
HSCHRUN_RANDOM_CTG2	1	1	14553	0	0	0
HSCHRUN_RANDOM_CTG20	272	272	1978	118579	9463	0
HSCHRUN_RANDOM_CTG21	1586	1586	49463	58592	0	0
HSCHRUN_RANDOM_CTG22	200	200	12358	1800	0	0
HSCHRUN_RANDOM_CTG23	93	93	43169	0	43598	0
HSCHRUN_RANDOM_CTG24	0	0	22773	0	0	0
HSCHRUN_RANDOM_CTG25	0	0	39021	0	0	0
HSCHRUN_RANDOM_CTG26	0	0	30923	0	0	0
HSCHRUN_RANDOM_CTG27	0	0	39809	0	40531	0
HSCHRUN_RANDOM_CTG28	0	0	1805	0	0	0
HSCHRUN_RANDOM_CTG29	0	0	5663	0	0	0
HSCHRUN_RANDOM_CTG3	0	0	0	0	0	0
HSCHRUN_RANDOM_CTG30	0	0	0	27428	18439	0
HSCHRUN_RANDOM_CTG31	162	162	0	39777	0	0
HSCHRUN_RANDOM_CTG32	0	0	0	0	33824	0
HSCHRUN_RANDOM_CTG33	0	0	0	0	0	0
HSCHRUN_RANDOM_CTG34	0	0	27855	0	0	0
HSCHRUN_RANDOM_CTG35	0	0	0	43523	0	0
HSCHRUN_RANDOM_CTG36	0	0	0	0	0	0
HSCHRUN_RANDOM_CTG37	0	0	0	0	0	0
HSCHRUN_RANDOM_CTG38	0	0	0	0	0	0
HSCHRUN_RANDOM_CTG39	0	0	0	38154	0	0
HSCHRUN_RANDOM_CTG4	0	0	113610	0	0	0
HSCHRUN_RANDOM_CTG40	0	0	0	36422	0	0
HSCHRUN_RANDOM_CTG41	0	0	0	39786	0	0
HSCHRUN_RANDOM_CTG42	0	0	0	38502	0	0
HSCHRUN_RANDOM_CTG5	54	54	0	172491	0	0
HSCHRUN_RANDOM_CTG6	0	0	33062	0	0	0
HSCHRUN_RANDOM_CTG7	0	0	75152	0	172149	0
HSCHRUN_RANDOM_CTG9	0	0	12571	0	0	0
X	4203448	283448	280900	459950	502885	0
Y	33729393	109393	200627	30768	98295	0
total	234709946	5391763	13778058	7427161	12363226	76643

## Sheet: GRCh37p-GRCh38p_top_ten
##GRCh37 Primary Assembly vs GRCh38 Primary Assembly assembly alignment report
##2016-07-07
##Top ten by category.
##No Hit
#chr	start	stop	len
Y	28819361	58819361	30000000
1	121485434	142535435	21050001
15	0	20000000	20000000
13	0	19020001	19020001
14	0	19000001	19000001
9	47317679	65467679	18150000
22	0	16050001	16050001
16	35285801	46414577	11128776
21	0	9411193	9411193
10	39154935	42354935	3200000
##Ungap No Hit
#chr	start	stop	len
15	21398819	21885000	486181
9	92528796	92678797	150001
1	144710724	144810725	100001
7	130154523	130254524	100001
9	92343416	92443417	100001
6	167942073	168042073	100000
2	87668206	87720798	52592
12	95739	148297	52558
1	146164650	146214921	50271
9	44676384	44726646	50262
##SP
#chr	start	stop	len
2	91747045	91908577	161532
16	32143662	32296585	152923
21	44458196	44593821	135625
16	32524615	32656532	131917
15	21071553	21201183	129630
14	19000001	19127781	127780
10	46560617	46682253	121636
16	33293767	33405469	111702
16	34197030	34306868	109838
HSCHRUN_RANDOM_CTG16	58102	161917	103815
##SP_only
#chr	start	stop	len
9	39445728	39663686	217958
9	41193215	41365793	172578
10	47892477	48055707	163230
HSCHRUN_RANDOM_CTG15	0	151599	151599
10	47174723	47323674	148951
9	43332039	43479693	147654
15	82652710	82780518	127808
HSCHR9_RANDOM_CTG4	64850	187035	122185
X	52282636	52395914	113278
HSCHRUN_RANDOM_CTG5	62303	172545	110242
##Inv
#chr	start	stop	len
10	48105707	49002271	896564
15	22646193	23514853	868660
9	43996569	44636411	639842
14	19489121	20125060	635939
22	16074202	16695849	621647
1	145355630	145833118	477488
9	43479693	43902250	422557
11	51197154	51594205	397051
9	40475834	40838031	362197
HSCHR1_RANDOM_CTG12	186659	547496	360837
##Mix
#chr	start	stop	len
10	48105707	49002271	896564
15	22646193	23514853	868660
9	43996569	44636411	639842
14	19489121	20125060	635939
22	16074202	16695849	621647
1	145355630	145833118	477488
9	43479693	43902250	422557
11	51197154	51594205	397051
9	40475834	40838031	362197
HSCHR1_RANDOM_CTG12	186659	547496	360837

## Sheet: GRCh38p-GRCh37p-alignment_stats
##GRCh38 Primary Assembly vs GRCh37 Primary Assembly assembly alignment report
##2016-07-07
##Overall stats
#Sequence	NoHit	UnGap_NoHit	Collapse(SP)	Expansion(SP Only)	Inversion	Mix
1	22103483	3832983	1256337	2894252	2223120	462759
2	3767601	2243601	91932	457020	344340	19722
3	3288279	3117979	165848	217074	0	0
4	2564733	2213771	129938	25916	0	0
5	3822430	3649230	15851	20602	0	0
6	2966785	2346785	151901	478940	327045	0
7	3763155	3493155	382049	475957	756794	0
8	2256765	1886765	173001	87352	144922	30518
9	19140236	2706136	2057526	1067575	2290227	24741
10	3400788	3230488	1217753	290093	1552777	0
11	3997500	3545606	122310	47341	418855	0
12	2765387	2642987	184773	43896	43247	0
13	18502029	2170829	0	95584	0	1524
14	18631567	2420067	29917	160952	635939	0
15	20103211	2942911	300364	569680	868632	0
16	10784629	2364329	14639	688978	7165	6739
17	4817583	4506384	233343	695496	39770	7493
18	5705662	5484762	0	3591	0	3845
19	2899704	2729304	156089	3584	0	0
20	3874529	3472380	3551	948531	0	0
21	9121588	2550388	203869	2290317	492591	37566
22	14214427	2591527	258871	1079762	621647	289179
HSCHR11_CTG1_UNLOCALIZED	1213	1213	0	99103	0	0
HSCHR14_CTG1_UNLOCALIZED	1	1	36420	0	0	0
HSCHR14_CTG2_UNLOCALIZED	0	0	0	0	0	0
HSCHR14_CTG3_UNLOCALIZED	24332	24332	0	169297	421	0
HSCHR14_CTG4_UNLOCALIZED	0	0	0	0	0	0
HSCHR14_CTG5_UNLOCALIZED	3347	3347	0	30626	0	0
HSCHR14_CTG6_UNLOCALIZED	6520	6520	0	33035	0	0
HSCHR14_CTG7_UNLOCALIZED	10055	10055	0	162755	0	0
HSCHR14_CTG8_UNLOCALIZED	4056	4056	0	34941	4742	0
HSCHR15_RANDOM_CTG1	845	845	0	395691	0	0
HSCHR16_RANDOM_CTG1	477304	177304	0	1393140	0	0
HSCHR17_RANDOM_CTG3	427	427	0	35778	149386	0
HSCHR17_RANDOM_CTG4	157242	145925	0	123597	0	0
HSCHR17_RANDOM_CTG5	106473	100504	0	6078	0	0
HSCHR1_CTG1_UNLOCALIZED	0	0	0	0	0	0
HSCHR1_CTG2_UNLOCALIZED	4749	4749	0	27283	0	0
HSCHR1_CTG3_UNLOCALIZED	2797	2797	0	104996	19769	0
HSCHR1_CTG4_UNLOCALIZED	1782	1782	0	29083	0	0
HSCHR1_CTG5_UNLOCALIZED	2	2	0	40174	0	0
HSCHR1_CTG6_UNLOCALIZED	1013	1013	0	41197	0	0
HSCHR1_CTG7_UNLOCALIZED	5262	5262	0	164745	0	0
HSCHR1_CTG8_UNLOCALIZED	1	1	0	40744	0	0
HSCHR1_CTG9_UNLOCALIZED	1001	1001	0	40716	0	0
HSCHR22_UNLOCALIZED_CTG1	1736	1736	9659	139359	2312	0
HSCHR22_UNLOCALIZED_CTG2	4150	4150	0	37393	0	0
HSCHR22_UNLOCALIZED_CTG3	7345	7345	0	172427	0	0
HSCHR22_UNLOCALIZED_CTG4	0	0	0	165050	0	0
HSCHR22_UNLOCALIZED_CTG5	5855	5855	0	36956	0	0
HSCHR22_UNLOCALIZED_CTG6	137032	124749	0	44888	0	0
HSCHR22_UNLOCALIZED_CTG7	58057	57646	0	45781	0	0
HSCHR22_UNLOCALIZED_CTG8	54234	50679	0	45141	0	0
HSCHR22_UNLOCALIZED_CTG9	73985	72423	0	0	0	0
HSCHR2_RANDOM_CTG1	161471	161471	0	0	0	0
HSCHR2_RANDOM_CTG2	153799	153799	0	0	0	0
HSCHR3UN_CTG2	0	0	0	0	0	0
HSCHR4_RANDOM_CTG4	1	1	0	14121	0	0
HSCHR5_RANDOM_CTG1	0	0	0	0	0	0
HSCHR9_UNLOCALIZED_CTG1	2115	2115	0	37947	0	0
HSCHR9_UNLOCALIZED_CTG2	2040	2040	0	34007	0	0
HSCHR9_UNLOCALIZED_CTG3	887	887	0	174003	1955	0
HSCHR9_UNLOCALIZED_CTG4	5936	5936	0	33114	0	0
HSCHRUN_RANDOM_100	2274	2274	0	0	0	0
HSCHRUN_RANDOM_101	2165	2165	0	0	0	0
HSCHRUN_RANDOM_102	1942	1942	0	0	0	0
HSCHRUN_RANDOM_103	1472	1472	0	0	0	0
HSCHRUN_RANDOM_104	21476	6208	0	0	0	0
HSCHRUN_RANDOM_105	4416	4416	0	0	0	0
HSCHRUN_RANDOM_106	1201	1201	0	0	0	0
HSCHRUN_RANDOM_107	1444	1444	0	0	0	0
HSCHRUN_RANDOM_108	2276	2276	0	0	0	0
HSCHRUN_RANDOM_109	998	998	0	0	0	0
HSCHRUN_RANDOM_110	12399	2966	0	0	0	0
HSCHRUN_RANDOM_111	37690	3624	0	0	0	0
HSCHRUN_RANDOM_112	1179	1179	0	0	0	0
HSCHRUN_RANDOM_113	2646	2646	0	0	0	0
HSCHRUN_RANDOM_114	2489	2489	0	0	0	0
HSCHRUN_RANDOM_115	1029	1029	0	0	0	0
HSCHRUN_RANDOM_116	2145	2145	0	0	0	0
HSCHRUN_RANDOM_117	2321	2321	0	0	0	0
HSCHRUN_RANDOM_118	2140	2140	0	0	0	0
HSCHRUN_RANDOM_119	2043	2043	0	0	0	0
HSCHRUN_RANDOM_120	1445	1445	0	0	0	0
HSCHRUN_RANDOM_121	981	981	0	0	0	0
HSCHRUN_RANDOM_122	1884	1884	0	0	0	0
HSCHRUN_RANDOM_123	1361	1361	0	0	0	0
HSCHRUN_RANDOM_124	264596	243564	0	127465	0	0
HSCHRUN_RANDOM_125	1233	1233	0	0	0	0
HSCHRUN_RANDOM_126	1774	1774	0	0	0	0
HSCHRUN_RANDOM_127	3920	3920	0	0	0	0
HSCHRUN_RANDOM_128	92983	92902	0	0	0	0
HSCHRUN_RANDOM_129	112505	84011	0	0	0	0
HSCHRUN_RANDOM_130	4055	4055	0	0	0	0
HSCHRUN_RANDOM_131	2415	2415	0	0	0	0
HSCHRUN_RANDOM_132	2318	2318	0	0	0	0
HSCHRUN_RANDOM_133	2186	2186	0	0	0	0
HSCHRUN_RANDOM_134	1951	1951	0	0	0	0
HSCHRUN_RANDOM_135	1300	1300	0	0	0	0
HSCHRUN_RANDOM_136	22689	22689	0	0	0	0
HSCHRUN_RANDOM_137	138126	137668	0	0	0	0
HSCHRUN_RANDOM_138	5674	5674	0	0	0	0
HSCHRUN_RANDOM_139	8127	8127	0	0	0	0
HSCHRUN_RANDOM_140	6361	6361	0	0	0	0
HSCHRUN_RANDOM_141	5353	5353	0	0	0	0
HSCHRUN_RANDOM_142	3253	3253	0	0	0	0
HSCHRUN_RANDOM_143	1899	1899	0	0	0	0
HSCHRUN_RANDOM_144	2983	2983	0	0	0	0
HSCHRUN_RANDOM_145	2168	2168	0	0	0	0
HSCHRUN_RANDOM_146	993	993	0	0	0	0
HSCHRUN_RANDOM_147	91309	63627	0	0	0	0
HSCHRUN_RANDOM_148	1202	1202	0	0	0	0
HSCHRUN_RANDOM_149	1599	1599	0	0	0	0
HSCHRUN_RANDOM_154	1400	1400	0	0	0	0
HSCHRUN_RANDOM_155	2969	2969	0	0	0	0
HSCHRUN_RANDOM_156	1553	1553	0	0	0	0
HSCHRUN_RANDOM_157	5095	5095	0	1951	0	0
HSCHRUN_RANDOM_158	25794	25794	0	5239	0	0
HSCHRUN_RANDOM_159	44474	35396	0	0	0	0
HSCHRUN_RANDOM_160	4685	4685	0	0	0	0
HSCHRUN_RANDOM_161	4513	4513	0	0	0	0
HSCHRUN_RANDOM_162	6504	6504	0	0	0	0
HSCHRUN_RANDOM_163	6158	6158	0	0	0	0
HSCHRUN_RANDOM_164	3041	3041	0	0	0	0
HSCHRUN_RANDOM_165	5796	5796	0	0	0	0
HSCHRUN_RANDOM_166	223	223	0	1429	0	0
HSCHRUN_RANDOM_167	1040	1040	0	0	0	0
HSCHRUN_RANDOM_168	1368	1368	0	0	0	0
HSCHRUN_RANDOM_169	2699	2699	0	0	0	0
HSCHRUN_RANDOM_170	1048	1048	0	0	0	0
HSCHRUN_RANDOM_171	1428	1428	0	0	0	0
HSCHRUN_RANDOM_172	1428	1428	0	0	0	0
HSCHRUN_RANDOM_173	1026	1026	0	0	0	0
HSCHRUN_RANDOM_174	1121	1121	0	0	0	0
HSCHRUN_RANDOM_175	1803	1803	0	0	0	0
HSCHRUN_RANDOM_176	2855	2855	0	0	0	0
HSCHRUN_RANDOM_177	3530	3530	0	0	0	0
HSCHRUN_RANDOM_178	8320	8320	0	0	0	0
HSCHRUN_RANDOM_179	1048	1048	0	0	0	0
HSCHRUN_RANDOM_180	1045	1045	0	0	0	0
HSCHRUN_RANDOM_181	1298	1298	0	0	0	0
HSCHRUN_RANDOM_182	2387	2387	0	0	0	0
HSCHRUN_RANDOM_183	1537	1537	0	0	0	0
HSCHRUN_RANDOM_184	1143	1143	0	0	0	0
HSCHRUN_RANDOM_185	1880	1880	0	0	0	0
HSCHRUN_RANDOM_186	1216	1216	0	0	0	0
HSCHRUN_RANDOM_187	970	970	0	0	0	0
HSCHRUN_RANDOM_188	1788	1788	0	0	0	0
HSCHRUN_RANDOM_189	1484	1484	0	0	0	0
HSCHRUN_RANDOM_190	1750	1750	0	0	0	0
HSCHRUN_RANDOM_191	1308	1308	0	0	0	0
HSCHRUN_RANDOM_192	1658	1658	0	0	0	0
HSCHRUN_RANDOM_193	971	971	0	0	0	0
HSCHRUN_RANDOM_194	1930	1930	0	0	0	0
HSCHRUN_RANDOM_195	990	990	0	0	0	0
HSCHRUN_RANDOM_196	4215	4215	0	0	0	0
HSCHRUN_RANDOM_197	1136	1136	0	0	0	0
HSCHRUN_RANDOM_198	2656	2656	0	0	0	0
HSCHRUN_RANDOM_199	1650	1650	0	0	0	0
HSCHRUN_RANDOM_200	1451	1451	0	0	0	0
HSCHRUN_RANDOM_201	2378	2378	0	0	0	0
HSCHRUN_RANDOM_202	2805	2805	0	0	0	0
HSCHRUN_RANDOM_203	5740	5740	0	2252	0	0
HSCHRUN_RANDOM_204	5385	5385	0	2257	0	0
HSCHRUN_RANDOM_CTG1	0	0	0	0	0	0
HSCHRUN_RANDOM_CTG10	0	0	0	0	0	0
HSCHRUN_RANDOM_CTG11	0	0	0	0	0	0
HSCHRUN_RANDOM_CTG16	0	0	6245	0	0	0
HSCHRUN_RANDOM_CTG17	8913	7126	0	148519	0	0
HSCHRUN_RANDOM_CTG19	0	0	0	0	0	0
HSCHRUN_RANDOM_CTG2	0	0	31578	0	0	0
HSCHRUN_RANDOM_CTG20	1085	1085	0	209573	0	0
HSCHRUN_RANDOM_CTG21	2521	2521	0	165951	0	0
HSCHRUN_RANDOM_CTG22	306	306	0	41585	0	0
HSCHRUN_RANDOM_CTG23	3938	3938	0	62548	0	0
HSCHRUN_RANDOM_CTG24	118243	118243	0	80492	0	0
HSCHRUN_RANDOM_CTG25	6990	6990	0	76859	9472	0
HSCHRUN_RANDOM_CTG26	4911	4911	0	153848	0	0
HSCHRUN_RANDOM_CTG27	6319	6319	0	142531	0	0
HSCHRUN_RANDOM_CTG28	2516	2516	0	148226	0	0
HSCHRUN_RANDOM_CTG29	27745	27745	0	0	0	0
HSCHRUN_RANDOM_CTG30	4579	4579	0	58365	0	0
HSCHRUN_RANDOM_CTG33	0	0	0	40191	0	0
HSCHRUN_RANDOM_CTG34	3394	3394	0	33329	0	0
HSCHRUN_RANDOM_CTG35	79590	79524	0	0	0	0
HSCHRUN_RANDOM_CTG36	71251	61851	0	0	0	0
HSCHRUN_RANDOM_CTG4	0	0	0	0	0	0
HSCHRUN_RANDOM_CTG42	0	0	0	0	0	0
HSCHRUN_RANDOM_CTG6	4314	4078	0	0	0	0
HSCHRUN_RANDOM_CTG9	0	0	0	0	0	0
HSCHRY_RANDOM_CTG1	37240	37240	0	0	0	0
X	5190040	4512029	476008	265262	502715	0
Y	31569929	1000280	30846	44285	98295	0
total	222199038	74109496	7740618	18407816	11556138	884086

## Sheet: GRCh38p-GRCh37p_top_ten
##GRCh38 Primary Assembly vs GRCh37 Primary Assembly assembly alignment report
##2016-07-07
##Top ten by category.
##No Hit
#chr	start	stop	len
Y	26673214	56673214	30000000
15	0	19794747	19794747
13	0	18171249	18171249
1	125171347	143260363	18089016
9	43331857	60518558	17186701
14	0	16023131	16023131
22	0	10510000	10510000
16	36251135	46380686	10129551
18	15410899	20930937	5520038
21	0	5010001	5010001
##Ungap No Hit
#chr	start	stop	len
18	15410899	20930937	5520038
17	22763679	26716619	3952940
X	58555579	62462542	3906963
11	50821348	54525074	3703726
1	121866364	125063396	3197032
5	47102683	50109807	3007124
19	24448980	27240874	2791894
7	58119534	60878235	2758701
12	34798337	37419036	2620699
10	39202524	41693521	2490997
##SP
#chr	start	stop	len
9	39445729	39663700	217971
10	17735713	17932651	196938
10	46647437	46835345	187908
10	46838577	47023806	185229
9	42309798	42480154	170356
9	41521771	41675713	153942
12	132954478	133106076	151598
X	52360116	52510614	150498
10	47484738	47633654	148916
15	82360481	82488405	127924
##SP_only
#chr	start	stop	len
HSCHR16_RANDOM_CTG1	1070243	1244131	173888
HSCHR15_RANDOM_CTG1	167143	340681	173538
1	144643639	144813400	169761
21	6211372	6377258	165886
HSCHR16_RANDOM_CTG1	904523	1069793	165270
HSCHR22_UNLOCALIZED_CTG4	0	165050	165050
HSCHR16_RANDOM_CTG1	1452030	1602998	150968
1	120179979	120320853	140874
21	6429754	6565395	135641
HSCHR16_RANDOM_CTG1	772502	904478	131976
##Inv
#chr	start	stop	len
9	41912138	43076349	1164211
10	46526688	47633654	1106966
15	22358242	23226874	868632
14	18862645	19498584	635939
22	15282113	15903760	621647
1	145601945	146074657	472712
11	54525074	54943929	418855
9	66854809	67217006	362197
1	206009146	206268643	259497
21	10580989	10814560	233571
##Mix
#chr	start	stop	len
9	41912138	43076349	1164211
10	46526688	47633654	1106966
15	22358242	23226874	868632
14	18862645	19498584	635939
22	15282113	15903760	621647
1	145601945	146074657	472712
11	54525074	54943929	418855
9	66854809	67217006	362197
1	206009146	206268643	259497
21	10580989	10814560	233571
