# Supplementary material for: Evaluation of GRCh38 and de novo haploid genome assemblies demonstrates the enduring quality of the reference assembly
Source: Genome Res. 2017 May;27(5):849–64. doi: 10.1101/gr.213611.116 (PMC5411779; doi:10.1101/gr.213611.116)
Supplement: Supplemental Material [file supp_gr.213611.116_Supplemental_Worksheet_S4.xlsx]

## Sheet: GRCh38ClinVarGainCov20
GRCh38_Locus	Total_GRCh38_Depth	rsid	GRCh37_Locus	Gene	GRC_Issue	Comment
chr9:133570346	2	rs113994124	136435468	ADAMTSL2	HG-1011	Dropped a redundant GRCh37 unloc scaffold
chr9:133570501	4	rs113994125	136435623	ADAMTSL2	HG-1011	Dropped a redundant GRCh37 unloc scaffold
chr15:82538938	8	rs116840812	82823346	RPS17	HG-251	Fixed a gap-flanking haplotype expansion
chr15:82538982	9	rs6991	82823390	RPS17	HG-251	Fixed a gap-flanking haplotype expansion
chr15:82540427	10	rs116840811	82824835	RPS17	HG-251	Fixed a gap-flanking haplotype expansion
chrX:154191716	1	rs104894914	153457207	OPN1MW	HG-1456	Ambiguously mapped SNP;Ampliconic replacement with CH17
chrX:154558590	6	rs137853328	153786805	IKBKG	HG-1456	Ampliconic replacement with CH17
chrX:154558602	7	rs386134240	153786817	IKBKG	HG-1456	Ampliconic replacement with CH17
chrX:154558649	8	rs179363866	153786864	IKBKG	HG-1456	Ampliconic replacement with CH17
chrX:154558657	8	rs386134241	153786872	IKBKG	HG-1456	Ampliconic replacement with CH17

## Sheet: GRCh37ClinVarLostCov20
GRCh37_Locus	Total_GRCh37_Depth	rsid	GRCh38_Locus	Gene	GRC_Issue	Comment
chr7:74193706	1	rs119103272	74779360	NCF1	HG-1257	Williams Region retiled
chr11:2021338	7	rs431825167	2000108	MRPL23	HG-2346	Added chr 11 unloc scaffold, should possibly be an alt
chr11:2021459	1	rs483353061	2000229	MRPL23	HG-2346	Added chr 11 unloc scaffold, should possibly be an alt
chr11:2021835	3	rs431825169	2000605	MRPL23	HG-2346	Added chr 11 unloc scaffold, should possibly be an alt
chr11:2021938	3	rs431825166	2000708	MRPL23	HG-2346	Added chr 11 unloc scaffold, should possibly be an alt
chr11:2022142	4	rs483353062	2000912	MRPL23	HG-2346	Added chr 11 unloc scaffold, should possibly be an alt
chr11:2022259	5	rs431825168	2001029	MRPL23	HG-2346	Added chr 11 unloc scaffold, should possibly be an alt
chr11:2022313	2	rs431825164	2001083	MRPL23	HG-2346	Added chr 11 unloc scaffold, should possibly be an alt
chr11:2022992	18	rs431825165	2001762	MRPL23	HG-2346	Added chr 11 unloc scaffold, should possibly be an alt
chr11:2022993	18	rs587777745	2001763	MRPL23	HG-2346	Added chr 11 unloc scaffold, should possibly be an alt
chr11:2023045	18	rs431825163	2001815	MRPL23	HG-2346	Added chr 11 unloc scaffold, should possibly be an alt
chr21:35821554	9	rs199473647	34449256	KCNE1	HG-1199	Update to CU633980.13, which had mouse contamination; contains paralog KCNE1B
chr21:35821559	9	rs142511345	34449261	KCNE1	HG-1199	Update to CU633980.13, which had mouse contamination; contains paralog KCNE1B
chr21:35821608	8	rs77442996	34449310	KCNE1	HG-1199	Update to CU633980.13, which had mouse contamination; contains paralog KCNE1B
chr21:35821641	6	rs199473362	34449343	KCNE1	HG-1199	Update to CU633980.13, which had mouse contamination; contains paralog KCNE1B
chr21:35821818	7	rs199473352	34449520	KCNE1	HG-1199	Update to CU633980.13, which had mouse contamination; contains paralog KCNE1B
chr21:35821821	7	rs1805127	34449523	KCNE1	HG-1199	Update to CU633980.13, which had mouse contamination; contains paralog KCNE1B
chr21:35821824	7	rs202036483	34449526	KCNE1	HG-1199	Update to CU633980.13, which had mouse contamination; contains paralog KCNE1B
chr21:35821826	7	rs199473351	34449528	KCNE1	HG-1199	Update to CU633980.13, which had mouse contamination; contains paralog KCNE1B
chr21:35821838	7	rs17857111	34449540	KCNE1	HG-1199	Update to CU633980.13, which had mouse contamination; contains paralog KCNE1B
chr21:35821839	7	rs200963514	34449541	KCNE1	HG-1199	Update to CU633980.13, which had mouse contamination; contains paralog KCNE1B
chr21:35821849	8	rs17173510	34449551	KCNE1	HG-1199	Update to CU633980.13, which had mouse contamination; contains paralog KCNE1B
chr21:35821850	7	rs199473350	34449552	KCNE1	HG-1199	Update to CU633980.13, which had mouse contamination; contains paralog KCNE1B
chr21:35831815	1	rs8127493	34459517	KCNE1	HG-1199	Update to CU633980.13, which had mouse contamination; contains paralog KCNE1B
chr21:44473867	7	rs1051319	43053757	CBS	HG-2223;HG-2371	Added a component on p-arm which seems to contain a seg dup of this q-arm seq
chr21:44473963	3	rs55646248	43053853	CBS	HG-2223;HG-2371	Added a component on p-arm which seems to contain a seg dup of this q-arm seq
chr21:44473967	3	rs779373902	43053857	CBS	HG-2223;HG-2371	Added a component on p-arm which seems to contain a seg dup of this q-arm seq
chr21:44473972	3	rs200259659	43053862	CBS	HG-2223;HG-2371	Added a component on p-arm which seems to contain a seg dup of this q-arm seq
chr21:44473980	4	rs9978104	43053870	CBS	HG-2223;HG-2371	Added a component on p-arm which seems to contain a seg dup of this q-arm seq
chr21:44474003	6	rs150828989	43053893	CBS	HG-2223;HG-2371	Added a component on p-arm which seems to contain a seg dup of this q-arm seq
chr21:44474014	6	rs566810122	43053904	CBS	HG-2223;HG-2371	Added a component on p-arm which seems to contain a seg dup of this q-arm seq
chr21:44474030	6	rs121964968	43053920	CBS	HG-2223;HG-2371	Added a component on p-arm which seems to contain a seg dup of this q-arm seq
chr21:44474079	6	rs786204466	43053969	CBS	HG-2223;HG-2371	Added a component on p-arm which seems to contain a seg dup of this q-arm seq
chr21:44476926	9	rs187828882	43056816	CBS	HG-2223;HG-2371	Added a component on p-arm which seems to contain a seg dup of this q-arm seq
chr21:44476938	10	rs794727162	43056828	CBS	HG-2223;HG-2371	Added a component on p-arm which seems to contain a seg dup of this q-arm seq
chr21:44476939	10	rs794727161	43056829	CBS	HG-2223;HG-2371	Added a component on p-arm which seems to contain a seg dup of this q-arm seq
chr21:44476986	7	rs143225442	43056876	CBS	HG-2223;HG-2371	Added a component on p-arm which seems to contain a seg dup of this q-arm seq
chr21:44478217	4	rs139077204	43058107	CBS	HG-2223;HG-2371	Added a component on p-arm which seems to contain a seg dup of this q-arm seq
chr21:44478311	5	rs201098477	43058201	CBS	HG-2223;HG-2371	Added a component on p-arm which seems to contain a seg dup of this q-arm seq
chr21:44478325	5	rs121964971	43058215	CBS	HG-2223;HG-2371	Added a component on p-arm which seems to contain a seg dup of this q-arm seq
chr21:44478377	3	rs115185587	43058267	CBS	HG-2223;HG-2371	Added a component on p-arm which seems to contain a seg dup of this q-arm seq
chr21:44478393	3	rs6586281	43058283	CBS	HG-2223;HG-2371	Added a component on p-arm which seems to contain a seg dup of this q-arm seq
chr21:44478943	1	rs786204679	43058833	CBS	HG-2223;HG-2371	Added a component on p-arm which seems to contain a seg dup of this q-arm seq
chr21:44478949	2	rs367962613	43058839	CBS	HG-2223;HG-2371	Added a component on p-arm which seems to contain a seg dup of this q-arm seq
chr21:44478972	2	rs28934891	43058862	CBS	HG-2223;HG-2371	Added a component on p-arm which seems to contain a seg dup of this q-arm seq
chr21:44478986	2	rs756467921	43058876	CBS	HG-2223;HG-2371	Added a component on p-arm which seems to contain a seg dup of this q-arm seq
chr21:44479022	3	rs863223434	43058912	CBS	HG-2223;HG-2371	Added a component on p-arm which seems to contain a seg dup of this q-arm seq
chr21:44479029	3	rs138211175	43058919	CBS	HG-2223;HG-2371	Added a component on p-arm which seems to contain a seg dup of this q-arm seq
chr21:44479036	3	rs150146702	43058926	CBS	HG-2223;HG-2371	Added a component on p-arm which seems to contain a seg dup of this q-arm seq
chr21:44479037	3	rs28934892	43058927	CBS	HG-2223;HG-2371	Added a component on p-arm which seems to contain a seg dup of this q-arm seq
chr21:44479045	3	rs138432416	43058935	CBS	HG-2223;HG-2371	Added a component on p-arm which seems to contain a seg dup of this q-arm seq
chr21:44479080	4	rs375846341	43058970	CBS	HG-2223;HG-2371	Added a component on p-arm which seems to contain a seg dup of this q-arm seq
chr21:44479324	3	rs116578198	43059214	CBS	HG-2223;HG-2371	Added a component on p-arm which seems to contain a seg dup of this q-arm seq
chr21:44479331	2	rs372609349	43059221	CBS	HG-2223;HG-2371	Added a component on p-arm which seems to contain a seg dup of this q-arm seq
chr21:44479336	2	rs863223433	43059226	CBS	HG-2223;HG-2371	Added a component on p-arm which seems to contain a seg dup of this q-arm seq
chr21:44479340	2	rs794727083	43059230	CBS	HG-2223;HG-2371	Added a component on p-arm which seems to contain a seg dup of this q-arm seq
chr21:44479409	6	rs121964967	43059299	CBS	HG-2223;HG-2371	Added a component on p-arm which seems to contain a seg dup of this q-arm seq
chr21:44480624	4	rs148589243	43060514	CBS	HG-2223;HG-2371	Added a component on p-arm which seems to contain a seg dup of this q-arm seq
chr21:44480626	4	rs863223437;rs863223436	43060516	CBS	HG-2223;HG-2371	Added a component on p-arm which seems to contain a seg dup of this q-arm seq
chr21:44480637	4	rs61735859	43060527	CBS	HG-2223;HG-2371	Added a component on p-arm which seems to contain a seg dup of this q-arm seq
chr21:44480638	5	rs121964972	43060528	CBS	HG-2223;HG-2371	Added a component on p-arm which seems to contain a seg dup of this q-arm seq
chr21:44480645	5	rs774926464	43060535	CBS	HG-2223;HG-2371	Added a component on p-arm which seems to contain a seg dup of this q-arm seq
chr21:44480670	5	rs863223429	43060560	CBS	HG-2223;HG-2371	Added a component on p-arm which seems to contain a seg dup of this q-arm seq
chr21:44482402	2	rs182908734	43062292	CBS	HG-2223;HG-2371	Added a component on p-arm which seems to contain a seg dup of this q-arm seq
chr21:44482421	3	rs771298943	43062311	CBS	HG-2223;HG-2371	Added a component on p-arm which seems to contain a seg dup of this q-arm seq
chr21:44482451	3	rs372822486	43062341	CBS	HG-2223;HG-2371	Added a component on p-arm which seems to contain a seg dup of this q-arm seq
chr21:44482454	3	rs398123151	43062344	CBS	HG-2223;HG-2371	Added a component on p-arm which seems to contain a seg dup of this q-arm seq
chr21:44482455	3	rs753731849	43062345	CBS	HG-2223;HG-2371	Added a component on p-arm which seems to contain a seg dup of this q-arm seq
chr21:44482468	5	rs777919630	43062358	CBS	HG-2223;HG-2371	Added a component on p-arm which seems to contain a seg dup of this q-arm seq
chr21:44482491	5	rs863223432	43062381	CBS	HG-2223;HG-2371	Added a component on p-arm which seems to contain a seg dup of this q-arm seq
chr21:44482936	10	rs1789953	43062826	CBS	HG-2223;HG-2371	Added a component on p-arm which seems to contain a seg dup of this q-arm seq
chr21:44483055	9	rs76292057	43062945	CBS	HG-2223;HG-2371	Added a component on p-arm which seems to contain a seg dup of this q-arm seq
chr21:44483078	5	rs2228298	43062968	CBS	HG-2223;HG-2371	Added a component on p-arm which seems to contain a seg dup of this q-arm seq
chr21:44483098	3	rs121964962	43062988	CBS	HG-2223;HG-2371	Added a component on p-arm which seems to contain a seg dup of this q-arm seq
chr21:44483276	3	rs55767206	43063166	CBS	HG-2223;HG-2371	Added a component on p-arm which seems to contain a seg dup of this q-arm seq
chr21:44484041	5	rs121964969	43063931	CBS	HG-2223;HG-2371	Added a component on p-arm which seems to contain a seg dup of this q-arm seq
chr21:44484053	3	rs149119723	43063943	CBS	HG-2223;HG-2371	Added a component on p-arm which seems to contain a seg dup of this q-arm seq
chr21:44485527	7	rs2298758	43065417	CBS	HG-2223;HG-2371	Added a component on p-arm which seems to contain a seg dup of this q-arm seq
chr21:44485547	7	rs369220569	43065437	CBS	HG-2223;HG-2371	Added a component on p-arm which seems to contain a seg dup of this q-arm seq
chr21:44485553	7	rs372679328	43065443	CBS	HG-2223;HG-2371	Added a component on p-arm which seems to contain a seg dup of this q-arm seq
chr21:44485590	7	rs73906420	43065480	CBS	HG-2223;HG-2371	Added a component on p-arm which seems to contain a seg dup of this q-arm seq
chr21:44485591	7	rs121964973	43065481	CBS	HG-2223;HG-2371	Added a component on p-arm which seems to contain a seg dup of this q-arm seq
chr21:44485609	7	rs794727835	43065499	CBS	HG-2223;HG-2371	Added a component on p-arm which seems to contain a seg dup of this q-arm seq
chr21:44485715	1	rs186114513	43065605	CBS	HG-2223;HG-2371	Added a component on p-arm which seems to contain a seg dup of this q-arm seq
chr21:44485731	1	rs762065361	43065621	CBS	HG-2223;HG-2371	Added a component on p-arm which seems to contain a seg dup of this q-arm seq
chr21:44486369	3	rs148782895	43066259	CBS	HG-2223;HG-2371	Added a component on p-arm which seems to contain a seg dup of this q-arm seq
chr21:44486370	3	rs121964963	43066260	CBS	HG-2223;HG-2371	Added a component on p-arm which seems to contain a seg dup of this q-arm seq
chr21:44486374	3	rs121964966	43066264	CBS	HG-2223;HG-2371	Added a component on p-arm which seems to contain a seg dup of this q-arm seq
chr21:44486389	5	rs121964965	43066279	CBS	HG-2223;HG-2371	Added a component on p-arm which seems to contain a seg dup of this q-arm seq
chr21:44486403	5	rs766958673	43066293	CBS	HG-2223;HG-2371	Added a component on p-arm which seems to contain a seg dup of this q-arm seq
chr21:44486404	5	rs147474549	43066294	CBS	HG-2223;HG-2371	Added a component on p-arm which seems to contain a seg dup of this q-arm seq
chr21:44486407	5	rs539326697	43066297	CBS	HG-2223;HG-2371	Added a component on p-arm which seems to contain a seg dup of this q-arm seq
chr21:44486410	5	rs140002610	43066300	CBS	HG-2223;HG-2371	Added a component on p-arm which seems to contain a seg dup of this q-arm seq
chr21:44486430	5	rs781444670	43066320	CBS	HG-2223;HG-2371	Added a component on p-arm which seems to contain a seg dup of this q-arm seq
chr21:44486442	5	rs770095972	43066332	CBS	HG-2223;HG-2371	Added a component on p-arm which seems to contain a seg dup of this q-arm seq
chr21:44486443	5	rs775992753	43066333	CBS	HG-2223;HG-2371	Added a component on p-arm which seems to contain a seg dup of this q-arm seq
chr21:44486458	5	rs760214620	43066348	CBS	HG-2223;HG-2371	Added a component on p-arm which seems to contain a seg dup of this q-arm seq
chr21:44486463	5	rs121964964	43066353	CBS	HG-2223;HG-2371	Added a component on p-arm which seems to contain a seg dup of this q-arm seq
chr21:44486479	3	rs778220779	43066369	CBS	HG-2223;HG-2371	Added a component on p-arm which seems to contain a seg dup of this q-arm seq
chr21:44488629	4	rs786204609	43068519	CBS	HG-2223;HG-2371	Added a component on p-arm which seems to contain a seg dup of this q-arm seq
chr21:44488631	4	rs34040148	43068521	CBS	HG-2223;HG-2371	Added a component on p-arm which seems to contain a seg dup of this q-arm seq
chr21:44488633	4	rs786204757	43068523	CBS	HG-2223;HG-2371	Added a component on p-arm which seems to contain a seg dup of this q-arm seq
chr21:44488669	3	rs772450760	43068559	CBS	HG-2223;HG-2371	Added a component on p-arm which seems to contain a seg dup of this q-arm seq
chr21:44488682	3	rs863223435	43068572	CBS	HG-2223;HG-2371	Added a component on p-arm which seems to contain a seg dup of this q-arm seq
chr21:44488702	2	rs786204608	43068592	CBS	HG-2223;HG-2371	Added a component on p-arm which seems to contain a seg dup of this q-arm seq
chr21:44488720	2	rs192232907	43068610	CBS	HG-2223;HG-2371	Added a component on p-arm which seems to contain a seg dup of this q-arm seq
chr21:44492095	9	rs2229413	43071985	CBS	HG-2223;HG-2371	Added a component on p-arm which seems to contain a seg dup of this q-arm seq
chr21:44492142	8	rs199948079	43072032	CBS	HG-2223;HG-2371	Added a component on p-arm which seems to contain a seg dup of this q-arm seq
chr21:44492158	7	rs148865119	43072048	CBS	HG-2223;HG-2371	Added a component on p-arm which seems to contain a seg dup of this q-arm seq
chr21:44492171	7	rs201372812	43072061	CBS	HG-2223;HG-2371	Added a component on p-arm which seems to contain a seg dup of this q-arm seq
chr21:44492239	8	rs763151207	43072129	CBS	HG-2223;HG-2371	Added a component on p-arm which seems to contain a seg dup of this q-arm seq
chr21:44492270	5	rs558259739	43072160	CBS	HG-2223;HG-2371	Added a component on p-arm which seems to contain a seg dup of this q-arm seq
chr21:44492299	5	rs546530618	43072189	CBS	HG-2223;HG-2371	Added a component on p-arm which seems to contain a seg dup of this q-arm seq
chr21:44492302	5	rs769766030	43072192	CBS	HG-2223;HG-2371	Added a component on p-arm which seems to contain a seg dup of this q-arm seq
chr21:44589236	8	rs74315440	43169126	CRYAA	HG-2223;HG-2371	Added a component on p-arm which seems to contain a seg dup of this q-arm seq
chr21:44589243	7	rs397515624	43169133	CRYAA	HG-2223;HG-2371	Added a component on p-arm which seems to contain a seg dup of this q-arm seq
chr21:44589270	6	rs397515625	43169160	CRYAA	HG-2223;HG-2371	Added a component on p-arm which seems to contain a seg dup of this q-arm seq
chr21:44589271	6	rs397515626	43169161	CRYAA	HG-2223;HG-2371	Added a component on p-arm which seems to contain a seg dup of this q-arm seq
chr21:44589351	5	rs864309685	43169241	CRYAA	HG-2223;HG-2371	Added a component on p-arm which seems to contain a seg dup of this q-arm seq
chr21:44589354	4	rs74315441	43169244	CRYAA	HG-2223;HG-2371	Added a component on p-arm which seems to contain a seg dup of this q-arm seq
chr21:44589369	3	rs397515623	43169259	CRYAA	HG-2223;HG-2371	Added a component on p-arm which seems to contain a seg dup of this q-arm seq
chr21:44590729	3	rs398122947	43170619	CRYAA	HG-2223;HG-2371	Added a component on p-arm which seems to contain a seg dup of this q-arm seq
chr21:44592214	5	rs74315439	43172104	CRYAA	HG-2223;HG-2371	Added a component on p-arm which seems to contain a seg dup of this q-arm seq
chr21:44592215	4	rs121912973	43172105	CRYAA	HG-2223;HG-2371	Added a component on p-arm which seems to contain a seg dup of this q-arm seq
chr22:18901004	1	rs450046	18913491	PRODH	HG-2372	Added chr 22 unloc scaffold, should possibly be an alt
chr22:18901005	1	rs193919334	18913492	PRODH	HG-2372	Added chr 22 unloc scaffold, should possibly be an alt
chr22:18905934	6	rs2904551	18918421	PRODH	HG-2372	Added chr 22 unloc scaffold, should possibly be an alt
chr22:18905964	7	rs2904552	18918451	PRODH	HG-2372	Added chr 22 unloc scaffold, should possibly be an alt
chr22:18909902	6	rs137852934	18922389	PRODH	HG-2372	Added chr 22 unloc scaffold, should possibly be an alt
chrX:153418541	11	rs949431	154153068	OPN1LW	HG-1456	Update mixed haplotype ampliconic region to CH17
chrX:153461425	2	rs104894916	154195934	OPN1MW	HG-1456	Update mixed haplotype ampliconic region to CH17
chrX:153791792	1	rs179363867	154563577	IKBKG	HG-1456	Update mixed haplotype ampliconic region to CH17
chrX:153791805	1	rs137853331	154563590	IKBKG	HG-1456	Update mixed haplotype ampliconic region to CH17
chrX:153791817	1	rs137853332	154563602	IKBKG	HG-1456	Update mixed haplotype ampliconic region to CH17
chrX:153791828	1	rs179363865	154563613	IKBKG	HG-1456	Update mixed haplotype ampliconic region to CH17

## Sheet: GRCh37.clinvar.20160502.ambig
#feat_name	source_int	mapped_int	source_id	mapped_id	source_length	mapped_length	source_start	source_stop	source_strand	source_sub_start	source_sub_stop	mapped_start	mapped_stop	mapped_strand	coverage	recip	asm_unit
rs864309621	1	1	1	1	2	2	120612003	120612004	+	120612003	120612004	120724194	120724195	-	1	Second Pass	Primary Assembly
rs864309621	1	2	1	1	2	2	120612003	120612004	+	120612003	120612004	149390866	149390867	-	1	Second Pass	Primary Assembly
rs864309621	1	3	1	1	2	2	120612003	120612004	+	120612003	120612004	120069389	120069390	+	1	First Pass	Primary Assembly
rs4021006	1	1	1	1	1	1	120612006	120612006	+	120612006	120612006	120724192	120724192	-	1	Second Pass	Primary Assembly
rs4021006	1	2	1	1	1	1	120612006	120612006	+	120612006	120612006	120069392	120069392	+	1	First Pass	Primary Assembly
rs782113557	1	1	1	1	1	1	120612014	120612014	+	120612014	120612014	120724184	120724184	-	1	Second Pass	Primary Assembly
rs782113557	1	2	1	1	1	1	120612014	120612014	+	120612014	120612014	149390858	149390858	-	1	Second Pass	Primary Assembly
rs782113557	1	3	1	1	1	1	120612014	120612014	+	120612014	120612014	120069400	120069400	+	1	First Pass	Primary Assembly
rs431825167	1	1	11	HSCHR11_CTG1_UNLOCALIZED	1	1	2021338	2021338	+	2021338	2021338	55290	55290	+	1	Second Pass	Primary Assembly
rs431825167	1	2	11	11	1	1	2021338	2021338	+	2021338	2021338	2000108	2000108	+	1	First Pass	Primary Assembly
rs483353061	1	1	11	HSCHR11_CTG1_UNLOCALIZED	1	1	2021459	2021459	+	2021459	2021459	55411	55411	+	1	Second Pass	Primary Assembly
rs483353061	1	2	11	11	1	1	2021459	2021459	+	2021459	2021459	2000229	2000229	+	1	First Pass	Primary Assembly
rs431825169	1	1	11	HSCHR11_CTG1_UNLOCALIZED	1	1	2021835	2021835	+	2021835	2021835	55787	55787	+	1	Second Pass	Primary Assembly
rs431825169	1	2	11	11	1	1	2021835	2021835	+	2021835	2021835	2000605	2000605	+	1	First Pass	Primary Assembly
rs431825166	1	1	11	HSCHR11_CTG1_UNLOCALIZED	1	1	2021938	2021938	+	2021938	2021938	55890	55890	+	1	Second Pass	Primary Assembly
rs431825166	1	2	11	11	1	1	2021938	2021938	+	2021938	2021938	2000708	2000708	+	1	First Pass	Primary Assembly
rs483353062	1	1	11	HSCHR11_CTG1_UNLOCALIZED	1	1	2022142	2022142	+	2022142	2022142	56094	56094	+	1	Second Pass	Primary Assembly
rs483353062	1	2	11	11	1	1	2022142	2022142	+	2022142	2022142	2000912	2000912	+	1	First Pass	Primary Assembly
rs431825168	1	1	11	HSCHR11_CTG1_UNLOCALIZED	1	1	2022259	2022259	+	2022259	2022259	56211	56211	+	1	Second Pass	Primary Assembly
rs431825168	1	2	11	11	1	1	2022259	2022259	+	2022259	2022259	2001029	2001029	+	1	First Pass	Primary Assembly
rs431825164	1	1	11	HSCHR11_CTG1_UNLOCALIZED	1	1	2022313	2022313	+	2022313	2022313	56265	56265	+	1	Second Pass	Primary Assembly
rs431825164	1	2	11	11	1	1	2022313	2022313	+	2022313	2022313	2001083	2001083	+	1	First Pass	Primary Assembly
rs431825165	1	1	11	HSCHR11_CTG1_UNLOCALIZED	21	21	2022993	2023013	+	2022993	2023013	56945	56965	+	1	Second Pass	Primary Assembly
rs431825165	1	2	11	11	21	21	2022993	2023013	+	2022993	2023013	2001763	2001783	+	1	First Pass	Primary Assembly
rs587777745	1	1	11	HSCHR11_CTG1_UNLOCALIZED	1	1	2022993	2022993	+	2022993	2022993	56945	56945	+	1	Second Pass	Primary Assembly
rs587777745	1	2	11	11	1	1	2022993	2022993	+	2022993	2022993	2001763	2001763	+	1	First Pass	Primary Assembly
rs431825163	1	1	11	HSCHR11_CTG1_UNLOCALIZED	1	1	2023045	2023045	+	2023045	2023045	56997	56997	+	1	Second Pass	Primary Assembly
rs431825163	1	2	11	11	1	1	2023045	2023045	+	2023045	2023045	2001815	2001815	+	1	First Pass	Primary Assembly
rs150363648	1	1	15	HSCHR15_4_CTG8	1	1	28518046	28518046	+	28518046	28518046	520131	520131	+	1	Second Pass	ALT_REF_LOCI_2
rs150363648	1	2	15	15	1	1	28518046	28518046	+	28518046	28518046	23310291	23310291	-	1	Second Pass	Primary Assembly
rs150363648	1	3	15	15	1	1	28518046	28518046	+	28518046	28518046	28272900	28272900	+	1	First Pass	Primary Assembly
rs773700445	1	1	15	HSCHR15_4_CTG8	1	1	28518130	28518130	+	28518130	28518130	520215	520215	+	1	Second Pass	ALT_REF_LOCI_2
rs773700445	1	2	15	15	1	1	28518130	28518130	+	28518130	28518130	23310208	23310208	-	1	Second Pass	Primary Assembly
rs773700445	1	3	15	15	1	1	28518130	28518130	+	28518130	28518130	28272984	28272984	+	1	First Pass	Primary Assembly
rs201979656	1	1	15	HSCHR15_4_CTG8	1	1	28518136	28518136	+	28518136	28518136	520221	520221	+	1	Second Pass	ALT_REF_LOCI_2
rs201979656	1	2	15	15	1	1	28518136	28518136	+	28518136	28518136	23310202	23310202	-	1	Second Pass	Primary Assembly
rs201979656	1	3	15	15	1	1	28518136	28518136	+	28518136	28518136	28272990	28272990	+	1	First Pass	Primary Assembly
rs74575904	1	1	17	17	1	1	21207813	21207813	+	21207813	21207813	21783430	21783430	-	1	Second Pass	Primary Assembly
rs74575904	1	2	17	17	1	1	21207813	21207813	+	21207813	21207813	21304501	21304501	+	1	First Pass	Primary Assembly
rs199473647	1	1	21	21	1	1	35821554	35821554	+	35821554	35821554	7819244	7819244	+	1	Second Pass	Primary Assembly
rs199473647	1	2	21	21	1	1	35821554	35821554	+	35821554	35821554	34449256	34449256	+	1	First Pass	Primary Assembly
rs142511345	1	1	21	21	1	1	35821559	35821559	+	35821559	35821559	7819249	7819249	+	1	Second Pass	Primary Assembly
rs142511345	1	2	21	21	1	1	35821559	35821559	+	35821559	35821559	34449261	34449261	+	1	First Pass	Primary Assembly
rs77442996	1	1	21	21	1	1	35821608	35821608	+	35821608	35821608	7819298	7819298	+	1	Second Pass	Primary Assembly
rs77442996	1	2	21	21	1	1	35821608	35821608	+	35821608	35821608	34449310	34449310	+	1	First Pass	Primary Assembly
rs199473362	1	1	21	21	1	1	35821641	35821641	+	35821641	35821641	7819331	7819331	+	1	Second Pass	Primary Assembly
rs199473362	1	2	21	21	1	1	35821641	35821641	+	35821641	35821641	34449343	34449343	+	1	First Pass	Primary Assembly
rs199473361	1	1	21	21	1	1	35821674	35821674	+	35821674	35821674	7819364	7819364	+	1	Second Pass	Primary Assembly
rs199473361	1	2	21	21	1	1	35821674	35821674	+	35821674	35821674	34449376	34449376	+	1	First Pass	Primary Assembly
rs1805128	1	1	21	21	1	1	35821680	35821680	+	35821680	35821680	7819370	7819370	+	1	Second Pass	Primary Assembly
rs1805128	1	2	21	21	1	1	35821680	35821680	+	35821680	35821680	34449382	34449382	+	1	First Pass	Primary Assembly
rs199473360	1	1	21	21	1	1	35821686	35821686	+	35821686	35821686	7819376	7819376	+	1	Second Pass	Primary Assembly
rs199473360	1	2	21	21	1	1	35821686	35821686	+	35821686	35821686	34449388	34449388	+	1	First Pass	Primary Assembly
rs199473359	1	1	21	21	1	1	35821691	35821691	+	35821691	35821691	7819381	7819381	+	1	Second Pass	Primary Assembly
rs199473359	1	2	21	21	1	1	35821691	35821691	+	35821691	35821691	34449393	34449393	+	1	First Pass	Primary Assembly
rs199473358	1	1	21	21	1	1	35821698	35821698	+	35821698	35821698	7819388	7819388	+	1	Second Pass	Primary Assembly
rs199473358	1	2	21	21	1	1	35821698	35821698	+	35821698	35821698	34449400	34449400	+	1	First Pass	Primary Assembly
rs74315445	1	1	21	21	1	1	35821707	35821707	+	35821707	35821707	7819397	7819397	+	1	Second Pass	Primary Assembly
rs74315445	1	2	21	21	1	1	35821707	35821707	+	35821707	35821707	34449409	34449409	+	1	First Pass	Primary Assembly
rs74315446	1	1	21	21	1	1	35821712	35821712	+	35821712	35821712	7819402	7819402	+	1	Second Pass	Primary Assembly
rs74315446	1	2	21	21	1	1	35821712	35821712	+	35821712	35821712	34449414	34449414	+	1	First Pass	Primary Assembly
rs199473357	1	1	21	21	1	1	35821713	35821713	+	35821713	35821713	7819403	7819403	+	1	Second Pass	Primary Assembly
rs199473357	1	2	21	21	1	1	35821713	35821713	+	35821713	35821713	34449415	34449415	+	1	First Pass	Primary Assembly
rs199473356	1	1	21	21	1	1	35821723	35821723	+	35821723	35821723	7819413	7819413	+	1	Second Pass	Primary Assembly
rs199473356	1	2	21	21	1	1	35821723	35821723	+	35821723	35821723	34449425	34449425	+	1	First Pass	Primary Assembly
rs199473646	1	1	21	21	1	1	35821724	35821724	+	35821724	35821724	7819414	7819414	+	1	Second Pass	Primary Assembly
rs199473646	1	2	21	21	1	1	35821724	35821724	+	35821724	35821724	34449426	34449426	+	1	First Pass	Primary Assembly
rs149338401	1	1	21	21	1	1	35821727	35821727	+	35821727	35821727	7819417	7819417	+	1	Second Pass	Primary Assembly
rs149338401	1	2	21	21	1	1	35821727	35821727	+	35821727	35821727	34449429	34449429	+	1	First Pass	Primary Assembly
rs199473393	1	1	21	21	1	1	35821731	35821731	+	35821731	35821731	7819421	7819421	+	1	Second Pass	Primary Assembly
rs199473393	1	2	21	21	1	1	35821731	35821731	+	35821731	35821731	34449433	34449433	+	1	First Pass	Primary Assembly
rs79654911	1	1	21	21	1	1	35821733	35821733	+	35821733	35821733	7819423	7819423	+	1	Second Pass	Primary Assembly
rs79654911	1	2	21	21	1	1	35821733	35821733	+	35821733	35821733	34449435	34449435	+	1	First Pass	Primary Assembly
rs199473645	1	1	21	21	1	1	35821734	35821734	+	35821734	35821734	7819424	7819424	+	1	Second Pass	Primary Assembly
rs199473645	1	2	21	21	1	1	35821734	35821734	+	35821734	35821734	34449436	34449436	+	1	First Pass	Primary Assembly
rs281865421	1	1	21	21	6	6	35821756	35821761	+	35821756	35821761	7819446	7819451	+	1	Second Pass	Primary Assembly
rs281865421	1	2	21	21	6	6	35821756	35821761	+	35821756	35821761	34449458	34449463	+	1	First Pass	Primary Assembly
rs141813529	1	1	21	21	1	1	35821757	35821757	+	35821757	35821757	7819447	7819447	+	1	Second Pass	Primary Assembly
rs141813529	1	2	21	21	1	1	35821757	35821757	+	35821757	35821757	34449459	34449459	+	1	First Pass	Primary Assembly
rs727503101	1	1	21	21	1	1	35821759	35821759	+	35821759	35821759	7819449	7819449	+	1	Second Pass	Primary Assembly
rs727503101	1	2	21	21	1	1	35821759	35821759	+	35821759	35821759	34449461	34449461	+	1	First Pass	Primary Assembly
rs147187721	1	1	21	21	1	1	35821761	35821761	+	35821761	35821761	7819451	7819451	+	1	Second Pass	Primary Assembly
rs147187721	1	2	21	21	1	1	35821761	35821761	+	35821761	35821761	34449463	34449463	+	1	First Pass	Primary Assembly
rs199473644	1	1	21	21	1	1	35821770	35821770	+	35821770	35821770	7819460	7819460	+	1	Second Pass	Primary Assembly
rs199473644	1	2	21	21	1	1	35821770	35821770	+	35821770	35821770	34449472	34449472	+	1	First Pass	Primary Assembly
rs199473355	1	1	21	21	1	1	35821775	35821775	+	35821775	35821775	7819465	7819465	+	1	Second Pass	Primary Assembly
rs199473355	1	2	21	21	1	1	35821775	35821775	+	35821775	35821775	34449477	34449477	+	1	First Pass	Primary Assembly
rs17173509	1	1	21	21	1	1	35821778	35821778	+	35821778	35821778	7819468	7819468	+	1	Second Pass	Primary Assembly
rs17173509	1	2	21	21	1	1	35821778	35821778	+	35821778	35821778	34449480	34449480	+	1	First Pass	Primary Assembly
rs199473354	1	1	21	21	1	1	35821779	35821779	+	35821779	35821779	7819469	7819469	+	1	Second Pass	Primary Assembly
rs199473354	1	2	21	21	1	1	35821779	35821779	+	35821779	35821779	34449481	34449481	+	1	First Pass	Primary Assembly
rs199473353	1	1	21	21	1	1	35821794	35821794	+	35821794	35821794	7819484	7819484	+	1	Second Pass	Primary Assembly
rs199473353	1	2	21	21	1	1	35821794	35821794	+	35821794	35821794	34449496	34449496	+	1	First Pass	Primary Assembly
rs199473352	1	1	21	21	1	1	35821818	35821818	+	35821818	35821818	7819508	7819508	+	1	Second Pass	Primary Assembly
rs199473352	1	2	21	21	1	1	35821818	35821818	+	35821818	35821818	34449520	34449520	+	1	First Pass	Primary Assembly
rs1805127	1	1	21	21	1	1	35821821	35821821	+	35821821	35821821	7819511	7819511	+	1	Second Pass	Primary Assembly
rs1805127	1	2	21	21	1	1	35821821	35821821	+	35821821	35821821	34449523	34449523	+	1	First Pass	Primary Assembly
rs202036483	1	1	21	21	1	1	35821824	35821824	+	35821824	35821824	7819514	7819514	+	1	Second Pass	Primary Assembly
rs202036483	1	2	21	21	1	1	35821824	35821824	+	35821824	35821824	34449526	34449526	+	1	First Pass	Primary Assembly
rs199473351	1	1	21	21	1	1	35821826	35821826	+	35821826	35821826	7819516	7819516	+	1	Second Pass	Primary Assembly
rs199473351	1	2	21	21	1	1	35821826	35821826	+	35821826	35821826	34449528	34449528	+	1	First Pass	Primary Assembly
rs17857111	1	1	21	21	1	1	35821838	35821838	+	35821838	35821838	7819528	7819528	+	1	Second Pass	Primary Assembly
rs17857111	1	2	21	21	1	1	35821838	35821838	+	35821838	35821838	34449540	34449540	+	1	First Pass	Primary Assembly
rs200963514	1	1	21	21	1	1	35821839	35821839	+	35821839	35821839	7819529	7819529	+	1	Second Pass	Primary Assembly
rs200963514	1	2	21	21	1	1	35821839	35821839	+	35821839	35821839	34449541	34449541	+	1	First Pass	Primary Assembly
rs17173510	1	1	21	21	1	1	35821849	35821849	+	35821849	35821849	7819539	7819539	+	1	Second Pass	Primary Assembly
rs17173510	1	2	21	21	1	1	35821849	35821849	+	35821849	35821849	34449551	34449551	+	1	First Pass	Primary Assembly
rs199473350	1	1	21	21	1	1	35821850	35821850	+	35821850	35821850	7819540	7819540	+	1	Second Pass	Primary Assembly
rs199473350	1	2	21	21	1	1	35821850	35821850	+	35821850	35821850	34449552	34449552	+	1	First Pass	Primary Assembly
rs199473349	1	1	21	21	1	1	35821874	35821874	+	35821874	35821874	7819564	7819564	+	1	Second Pass	Primary Assembly
rs199473349	1	2	21	21	1	1	35821874	35821874	+	35821874	35821874	34449576	34449576	+	1	First Pass	Primary Assembly
rs187686559	1	1	21	21	1	1	35821903	35821903	+	35821903	35821903	7819593	7819593	+	1	Second Pass	Primary Assembly
rs187686559	1	2	21	21	1	1	35821903	35821903	+	35821903	35821903	34449605	34449605	+	1	First Pass	Primary Assembly
rs144917638	1	1	21	21	1	1	35821904	35821904	+	35821904	35821904	7819594	7819594	+	1	Second Pass	Primary Assembly
rs144917638	1	2	21	21	1	1	35821904	35821904	+	35821904	35821904	34449606	34449606	+	1	First Pass	Primary Assembly
rs144094344	1	1	21	21	1	1	35821909	35821909	+	35821909	35821909	7819599	7819599	+	1	Second Pass	Primary Assembly
rs144094344	1	2	21	21	1	1	35821909	35821909	+	35821909	35821909	34449611	34449611	+	1	First Pass	Primary Assembly
rs199473348	1	1	21	21	1	1	35821910	35821910	+	35821910	35821910	7819600	7819600	+	1	Second Pass	Primary Assembly
rs199473348	1	2	21	21	1	1	35821910	35821910	+	35821910	35821910	34449612	34449612	+	1	First Pass	Primary Assembly
rs28933384	1	1	21	21	1	1	35821913	35821913	+	35821913	35821913	7819603	7819603	+	1	Second Pass	Primary Assembly
rs28933384	1	2	21	21	1	1	35821913	35821913	+	35821913	35821913	34449615	34449615	+	1	First Pass	Primary Assembly
rs727503102	1	1	21	21	1	1	35821915	35821915	+	35821915	35821915	7819605	7819605	+	1	Second Pass	Primary Assembly
rs727503102	1	2	21	21	1	1	35821915	35821915	+	35821915	35821915	34449617	34449617	+	1	First Pass	Primary Assembly
rs397515878	1	1	21	21	1	1	35821935	35821935	+	35821935	35821935	7819625	7819625	+	1	Second Pass	Primary Assembly
rs397515878	1	2	21	21	1	1	35821935	35821935	+	35821935	35821935	34449637	34449637	+	1	First Pass	Primary Assembly
rs8127493	1	1	21	21	1	1	35831815	35831815	+	35831815	35831815	7829505	7829505	+	1	Second Pass	Primary Assembly
rs8127493	1	2	21	21	1	1	35831815	35831815	+	35831815	35831815	34459517	34459517	+	1	First Pass	Primary Assembly
rs1051319	1	1	21	21	1	1	44473867	44473867	+	44473867	44473867	6445435	6445435	+	1	Second Pass	Primary Assembly
rs1051319	1	2	21	21	1	1	44473867	44473867	+	44473867	44473867	43053757	43053757	+	1	First Pass	Primary Assembly
rs55646248	1	1	21	21	1	1	44473963	44473963	+	44473963	44473963	6445531	6445531	+	1	Second Pass	Primary Assembly
rs55646248	1	2	21	21	1	1	44473963	44473963	+	44473963	44473963	43053853	43053853	+	1	First Pass	Primary Assembly
rs779373902	1	1	21	21	1	1	44473967	44473967	+	44473967	44473967	6445535	6445535	+	1	Second Pass	Primary Assembly
rs779373902	1	2	21	21	1	1	44473967	44473967	+	44473967	44473967	43053857	43053857	+	1	First Pass	Primary Assembly
rs200259659	1	1	21	21	1	1	44473972	44473972	+	44473972	44473972	6445540	6445540	+	1	Second Pass	Primary Assembly
rs200259659	1	2	21	21	1	1	44473972	44473972	+	44473972	44473972	43053862	43053862	+	1	First Pass	Primary Assembly
rs9978104	1	1	21	21	1	1	44473980	44473980	+	44473980	44473980	6445548	6445548	+	1	Second Pass	Primary Assembly
rs9978104	1	2	21	21	1	1	44473980	44473980	+	44473980	44473980	43053870	43053870	+	1	First Pass	Primary Assembly
rs150828989	1	1	21	21	1	1	44474003	44474003	+	44474003	44474003	6445571	6445571	+	1	Second Pass	Primary Assembly
rs150828989	1	2	21	21	1	1	44474003	44474003	+	44474003	44474003	43053893	43053893	+	1	First Pass	Primary Assembly
rs566810122	1	1	21	21	1	1	44474014	44474014	+	44474014	44474014	6445582	6445582	+	1	Second Pass	Primary Assembly
rs566810122	1	2	21	21	1	1	44474014	44474014	+	44474014	44474014	43053904	43053904	+	1	First Pass	Primary Assembly
rs121964968	1	1	21	21	1	1	44474030	44474030	+	44474030	44474030	6445598	6445598	+	1	Second Pass	Primary Assembly
rs121964968	1	2	21	21	1	1	44474030	44474030	+	44474030	44474030	43053920	43053920	+	1	First Pass	Primary Assembly
rs786204466	1	1	21	21	1	1	44474080	44474080	+	44474080	44474080	6445648	6445648	+	1	Second Pass	Primary Assembly
rs786204466	1	2	21	21	1	1	44474080	44474080	+	44474080	44474080	43053970	43053970	+	1	First Pass	Primary Assembly
rs187828882	1	1	21	21	1	1	44476926	44476926	+	44476926	44476926	6448494	6448494	+	1	Second Pass	Primary Assembly
rs187828882	1	2	21	21	1	1	44476926	44476926	+	44476926	44476926	43056816	43056816	+	1	First Pass	Primary Assembly
rs794727162	1	1	21	21	1	1	44476938	44476938	+	44476938	44476938	6448506	6448506	+	1	Second Pass	Primary Assembly
rs794727162	1	2	21	21	1	1	44476938	44476938	+	44476938	44476938	43056828	43056828	+	1	First Pass	Primary Assembly
rs794727161	1	1	21	21	1	1	44476939	44476939	+	44476939	44476939	6448507	6448507	+	1	Second Pass	Primary Assembly
rs794727161	1	2	21	21	1	1	44476939	44476939	+	44476939	44476939	43056829	43056829	+	1	First Pass	Primary Assembly
rs143225442	1	1	21	21	1	1	44476986	44476986	+	44476986	44476986	6448554	6448554	+	1	Second Pass	Primary Assembly
rs143225442	1	2	21	21	1	1	44476986	44476986	+	44476986	44476986	43056876	43056876	+	1	First Pass	Primary Assembly
rs139077204	1	1	21	21	1	1	44478217	44478217	+	44478217	44478217	6449785	6449785	+	1	Second Pass	Primary Assembly
rs139077204	1	2	21	21	1	1	44478217	44478217	+	44478217	44478217	43058107	43058107	+	1	First Pass	Primary Assembly
rs201098477	1	1	21	21	1	1	44478311	44478311	+	44478311	44478311	6449879	6449879	+	1	Second Pass	Primary Assembly
rs201098477	1	2	21	21	1	1	44478311	44478311	+	44478311	44478311	43058201	43058201	+	1	First Pass	Primary Assembly
rs121964971	1	1	21	21	1	1	44478325	44478325	+	44478325	44478325	6449893	6449893	+	1	Second Pass	Primary Assembly
rs121964971	1	2	21	21	1	1	44478325	44478325	+	44478325	44478325	43058215	43058215	+	1	First Pass	Primary Assembly
rs115185587	1	1	21	21	1	1	44478377	44478377	+	44478377	44478377	6449945	6449945	+	1	Second Pass	Primary Assembly
rs115185587	1	2	21	21	1	1	44478377	44478377	+	44478377	44478377	43058267	43058267	+	1	First Pass	Primary Assembly
rs6586281	1	1	21	21	1	1	44478393	44478393	+	44478393	44478393	6449961	6449961	+	1	Second Pass	Primary Assembly
rs6586281	1	2	21	21	1	1	44478393	44478393	+	44478393	44478393	43058283	43058283	+	1	First Pass	Primary Assembly
rs6586282	1	1	21	21	1	1	44478497	44478497	+	44478497	44478497	6450065	6450065	+	1	Second Pass	Primary Assembly
rs6586282	1	2	21	21	1	1	44478497	44478497	+	44478497	44478497	43058387	43058387	+	1	First Pass	Primary Assembly
rs786204679	1	1	21	21	1	1	44478943	44478943	+	44478943	44478943	6450511	6450511	+	1	Second Pass	Primary Assembly
rs786204679	1	2	21	21	1	1	44478943	44478943	+	44478943	44478943	43058833	43058833	+	1	First Pass	Primary Assembly
rs367962613	1	1	21	21	1	1	44478949	44478949	+	44478949	44478949	6450517	6450517	+	1	Second Pass	Primary Assembly
rs367962613	1	2	21	21	1	1	44478949	44478949	+	44478949	44478949	43058839	43058839	+	1	First Pass	Primary Assembly
rs28934891	1	1	21	21	1	1	44478972	44478972	+	44478972	44478972	6450540	6450540	+	1	Second Pass	Primary Assembly
rs28934891	1	2	21	21	1	1	44478972	44478972	+	44478972	44478972	43058862	43058862	+	1	First Pass	Primary Assembly
rs756467921	1	1	21	21	1	1	44478986	44478986	+	44478986	44478986	6450554	6450554	+	1	Second Pass	Primary Assembly
rs756467921	1	2	21	21	1	1	44478986	44478986	+	44478986	44478986	43058876	43058876	+	1	First Pass	Primary Assembly
rs863223434	1	1	21	21	1	1	44479022	44479022	+	44479022	44479022	6450590	6450590	+	1	Second Pass	Primary Assembly
rs863223434	1	2	21	21	1	1	44479022	44479022	+	44479022	44479022	43058912	43058912	+	1	First Pass	Primary Assembly
rs138211175	1	1	21	21	1	1	44479029	44479029	+	44479029	44479029	6450597	6450597	+	1	Second Pass	Primary Assembly
rs138211175	1	2	21	21	1	1	44479029	44479029	+	44479029	44479029	43058919	43058919	+	1	First Pass	Primary Assembly
rs150146702	1	1	21	21	1	1	44479036	44479036	+	44479036	44479036	6450604	6450604	+	1	Second Pass	Primary Assembly
rs150146702	1	2	21	21	1	1	44479036	44479036	+	44479036	44479036	43058926	43058926	+	1	First Pass	Primary Assembly
rs28934892	1	1	21	21	1	1	44479037	44479037	+	44479037	44479037	6450605	6450605	+	1	Second Pass	Primary Assembly
rs28934892	1	2	21	21	1	1	44479037	44479037	+	44479037	44479037	43058927	43058927	+	1	First Pass	Primary Assembly
rs138432416	1	1	21	21	1	1	44479045	44479045	+	44479045	44479045	6450613	6450613	+	1	Second Pass	Primary Assembly
rs138432416	1	2	21	21	1	1	44479045	44479045	+	44479045	44479045	43058935	43058935	+	1	First Pass	Primary Assembly
rs375846341	1	1	21	21	1	1	44479080	44479080	+	44479080	44479080	6450648	6450648	+	1	Second Pass	Primary Assembly
rs375846341	1	2	21	21	1	1	44479080	44479080	+	44479080	44479080	43058970	43058970	+	1	First Pass	Primary Assembly
rs116578198	1	1	21	21	1	1	44479324	44479324	+	44479324	44479324	6450892	6450892	+	1	Second Pass	Primary Assembly
rs116578198	1	2	21	21	1	1	44479324	44479324	+	44479324	44479324	43059214	43059214	+	1	First Pass	Primary Assembly
rs372609349	1	1	21	21	1	1	44479331	44479331	+	44479331	44479331	6450899	6450899	+	1	Second Pass	Primary Assembly
rs372609349	1	2	21	21	1	1	44479331	44479331	+	44479331	44479331	43059221	43059221	+	1	First Pass	Primary Assembly
rs863223433	1	1	21	21	1	1	44479336	44479336	+	44479336	44479336	6450904	6450904	+	1	Second Pass	Primary Assembly
rs863223433	1	2	21	21	1	1	44479336	44479336	+	44479336	44479336	43059226	43059226	+	1	First Pass	Primary Assembly
rs794727083	1	1	21	21	1	1	44479341	44479341	+	44479341	44479341	6450909	6450909	+	1	Second Pass	Primary Assembly
rs794727083	1	2	21	21	1	1	44479341	44479341	+	44479341	44479341	43059231	43059231	+	1	First Pass	Primary Assembly
rs121964967	1	1	21	21	1	1	44479409	44479409	+	44479409	44479409	6450977	6450977	+	1	Second Pass	Primary Assembly
rs121964967	1	2	21	21	1	1	44479409	44479409	+	44479409	44479409	43059299	43059299	+	1	First Pass	Primary Assembly
rs201158177	1	1	21	21	1	1	44480544	44480544	+	44480544	44480544	6452112	6452112	+	1	Second Pass	Primary Assembly
rs201158177	1	2	21	21	1	1	44480544	44480544	+	44480544	44480544	43060434	43060434	+	1	First Pass	Primary Assembly
rs763036586	1	1	21	21	1	1	44480560	44480560	+	44480560	44480560	6452128	6452128	+	1	Second Pass	Primary Assembly
rs763036586	1	2	21	21	1	1	44480560	44480560	+	44480560	44480560	43060450	43060450	+	1	First Pass	Primary Assembly
rs769080151	1	1	21	21	1	1	44480561	44480561	+	44480561	44480561	6452129	6452129	+	1	Second Pass	Primary Assembly
rs769080151	1	2	21	21	1	1	44480561	44480561	+	44480561	44480561	43060451	43060451	+	1	First Pass	Primary Assembly
rs775354680	1	1	21	21	1	1	44480582	44480582	+	44480582	44480582	6452150	6452150	+	1	Second Pass	Primary Assembly
rs775354680	1	2	21	21	1	1	44480582	44480582	+	44480582	44480582	43060472	43060472	+	1	First Pass	Primary Assembly
rs372010465	1	1	21	21	1	1	44480585	44480585	+	44480585	44480585	6452153	6452153	+	1	Second Pass	Primary Assembly
rs372010465	1	2	21	21	1	1	44480585	44480585	+	44480585	44480585	43060475	43060475	+	1	First Pass	Primary Assembly
rs117687681	1	1	21	21	1	1	44480591	44480591	+	44480591	44480591	6452159	6452159	+	1	Second Pass	Primary Assembly
rs117687681	1	2	21	21	1	1	44480591	44480591	+	44480591	44480591	43060481	43060481	+	1	First Pass	Primary Assembly
rs1801181	1	1	21	21	1	1	44480616	44480616	+	44480616	44480616	6452184	6452184	+	1	Second Pass	Primary Assembly
rs1801181	1	2	21	21	1	1	44480616	44480616	+	44480616	44480616	43060506	43060506	+	1	First Pass	Primary Assembly
rs148589243	1	1	21	21	1	1	44480624	44480624	+	44480624	44480624	6452192	6452192	+	1	Second Pass	Primary Assembly
rs148589243	1	2	21	21	1	1	44480624	44480624	+	44480624	44480624	43060514	43060514	+	1	First Pass	Primary Assembly
rs863223437	1	1	21	21	1	1	44480626	44480626	+	44480626	44480626	6452194	6452194	+	1	Second Pass	Primary Assembly
rs863223437	1	2	21	21	1	1	44480626	44480626	+	44480626	44480626	43060516	43060516	+	1	First Pass	Primary Assembly
rs863223436	1	1	21	21	9	9	44480627	44480635	+	44480627	44480635	6452195	6452203	+	1	Second Pass	Primary Assembly
rs863223436	1	2	21	21	9	9	44480627	44480635	+	44480627	44480635	43060517	43060525	+	1	First Pass	Primary Assembly
rs61735859	1	1	21	21	1	1	44480637	44480637	+	44480637	44480637	6452205	6452205	+	1	Second Pass	Primary Assembly
rs61735859	1	2	21	21	1	1	44480637	44480637	+	44480637	44480637	43060527	43060527	+	1	First Pass	Primary Assembly
rs121964972	1	1	21	21	1	1	44480638	44480638	+	44480638	44480638	6452206	6452206	+	1	Second Pass	Primary Assembly
rs121964972	1	2	21	21	1	1	44480638	44480638	+	44480638	44480638	43060528	43060528	+	1	First Pass	Primary Assembly
rs774926464	1	1	21	21	1	1	44480645	44480645	+	44480645	44480645	6452213	6452213	+	1	Second Pass	Primary Assembly
rs774926464	1	2	21	21	1	1	44480645	44480645	+	44480645	44480645	43060535	43060535	+	1	First Pass	Primary Assembly
rs863223429	1	1	21	21	1	1	44480670	44480670	+	44480670	44480670	6452238	6452238	+	1	Second Pass	Primary Assembly
rs863223429	1	2	21	21	1	1	44480670	44480670	+	44480670	44480670	43060560	43060560	+	1	First Pass	Primary Assembly
rs182908734	1	1	21	21	1	1	44482402	44482402	+	44482402	44482402	6453970	6453970	+	1	Second Pass	Primary Assembly
rs182908734	1	2	21	21	1	1	44482402	44482402	+	44482402	44482402	43062292	43062292	+	1	First Pass	Primary Assembly
rs771298943	1	1	21	21	1	1	44482421	44482421	+	44482421	44482421	6453989	6453989	+	1	Second Pass	Primary Assembly
rs771298943	1	2	21	21	1	1	44482421	44482421	+	44482421	44482421	43062311	43062311	+	1	First Pass	Primary Assembly
rs372822486	1	1	21	21	1	1	44482451	44482451	+	44482451	44482451	6454019	6454019	+	1	Second Pass	Primary Assembly
rs372822486	1	2	21	21	1	1	44482451	44482451	+	44482451	44482451	43062341	43062341	+	1	First Pass	Primary Assembly
rs398123151	1	1	21	21	1	1	44482454	44482454	+	44482454	44482454	6454022	6454022	+	1	Second Pass	Primary Assembly
rs398123151	1	2	21	21	1	1	44482454	44482454	+	44482454	44482454	43062344	43062344	+	1	First Pass	Primary Assembly
rs753731849	1	1	21	21	1	1	44482455	44482455	+	44482455	44482455	6454023	6454023	+	1	Second Pass	Primary Assembly
rs753731849	1	2	21	21	1	1	44482455	44482455	+	44482455	44482455	43062345	43062345	+	1	First Pass	Primary Assembly
rs777919630	1	1	21	21	1	1	44482468	44482468	+	44482468	44482468	6454036	6454036	+	1	Second Pass	Primary Assembly
rs777919630	1	2	21	21	1	1	44482468	44482468	+	44482468	44482468	43062358	43062358	+	1	First Pass	Primary Assembly
rs863223432	1	1	21	21	1	1	44482491	44482491	+	44482491	44482491	6454059	6454059	+	1	Second Pass	Primary Assembly
rs863223432	1	2	21	21	1	1	44482491	44482491	+	44482491	44482491	43062381	43062381	+	1	First Pass	Primary Assembly
rs1789953	1	1	21	21	1	1	44482936	44482936	+	44482936	44482936	6454504	6454504	+	1	Second Pass	Primary Assembly
rs1789953	1	2	21	21	1	1	44482936	44482936	+	44482936	44482936	43062826	43062826	+	1	First Pass	Primary Assembly
rs76292057	1	1	21	21	1	1	44483055	44483055	+	44483055	44483055	6454623	6454623	+	1	Second Pass	Primary Assembly
rs76292057	1	2	21	21	1	1	44483055	44483055	+	44483055	44483055	43062945	43062945	+	1	First Pass	Primary Assembly
rs2228298	1	1	21	21	1	1	44483078	44483078	+	44483078	44483078	6454646	6454646	+	1	Second Pass	Primary Assembly
rs2228298	1	2	21	21	1	1	44483078	44483078	+	44483078	44483078	43062968	43062968	+	1	First Pass	Primary Assembly
rs121964962	1	1	21	21	1	1	44483098	44483098	+	44483098	44483098	6454666	6454666	+	1	Second Pass	Primary Assembly
rs121964962	1	2	21	21	1	1	44483098	44483098	+	44483098	44483098	43062988	43062988	+	1	First Pass	Primary Assembly
rs147040567	1	1	21	21	1	1	44483161	44483161	+	44483161	44483161	6454729	6454729	+	1	Second Pass	Primary Assembly
rs147040567	1	2	21	21	1	1	44483161	44483161	+	44483161	44483161	43063051	43063051	+	1	First Pass	Primary Assembly
rs786200967	1	1	21	21	1	1	44483172	44483172	+	44483172	44483172	6454740	6454740	+	1	Second Pass	Primary Assembly
rs786200967	1	2	21	21	1	1	44483172	44483172	+	44483172	44483172	43063062	43063062	+	1	First Pass	Primary Assembly
rs863223428	1	1	21	21	1	1	44483173	44483173	+	44483173	44483173	6454741	6454741	+	1	Second Pass	Primary Assembly
rs863223428	1	2	21	21	1	1	44483173	44483173	+	44483173	44483173	43063063	43063063	+	1	First Pass	Primary Assembly
rs864622693	1	1	21	21	1	1	44483184	44483184	+	44483184	44483184	6454752	6454752	+	1	Second Pass	Primary Assembly
rs864622693	1	2	21	21	1	1	44483184	44483184	+	44483184	44483184	43063074	43063074	+	1	First Pass	Primary Assembly
rs5742905	1	1	21	21	1	1	44483184	44483184	+	44483184	44483184	6454752	6454752	+	1	Second Pass	Primary Assembly
rs5742905	1	2	21	21	1	1	44483184	44483184	+	44483184	44483184	43063074	43063074	+	1	First Pass	Primary Assembly
rs75616587	1	1	21	21	1	1	44483200	44483200	+	44483200	44483200	6454768	6454768	+	1	Second Pass	Primary Assembly
rs75616587	1	2	21	21	1	1	44483200	44483200	+	44483200	44483200	43063090	43063090	+	1	First Pass	Primary Assembly
rs201106576	1	1	21	21	1	1	44483201	44483201	+	44483201	44483201	6454769	6454769	+	1	Second Pass	Primary Assembly
rs201106576	1	2	21	21	1	1	44483201	44483201	+	44483201	44483201	43063091	43063091	+	1	First Pass	Primary Assembly
rs370697155	1	1	21	21	1	1	44483202	44483202	+	44483202	44483202	6454770	6454770	+	1	Second Pass	Primary Assembly
rs370697155	1	2	21	21	1	1	44483202	44483202	+	44483202	44483202	43063092	43063092	+	1	First Pass	Primary Assembly
rs55767206	1	1	21	21	1	1	44483276	44483276	+	44483276	44483276	6454844	6454844	+	1	Second Pass	Primary Assembly
rs55767206	1	2	21	21	1	1	44483276	44483276	+	44483276	44483276	43063166	43063166	+	1	First Pass	Primary Assembly
rs121964969	1	1	21	21	1	1	44484041	44484041	+	44484041	44484041	6455609	6455609	+	1	Second Pass	Primary Assembly
rs121964969	1	2	21	21	1	1	44484041	44484041	+	44484041	44484041	43063931	43063931	+	1	First Pass	Primary Assembly
rs149119723	1	1	21	21	1	1	44484053	44484053	+	44484053	44484053	6455621	6455621	+	1	Second Pass	Primary Assembly
rs149119723	1	2	21	21	1	1	44484053	44484053	+	44484053	44484053	43063943	43063943	+	1	First Pass	Primary Assembly
rs758236584	1	1	21	21	1	1	44484068	44484068	+	44484068	44484068	6455636	6455636	+	1	Second Pass	Primary Assembly
rs758236584	1	2	21	21	1	1	44484068	44484068	+	44484068	44484068	43063958	43063958	+	1	First Pass	Primary Assembly
rs863223431	1	1	21	21	1	1	44484088	44484088	+	44484088	44484088	6455656	6455656	+	1	Second Pass	Primary Assembly
rs863223431	1	2	21	21	1	1	44484088	44484088	+	44484088	44484088	43063978	43063978	+	1	First Pass	Primary Assembly
rs863223430	1	1	21	21	1	1	44485311	44485311	+	44485311	44485311	6456879	6456879	+	1	Second Pass	Primary Assembly
rs863223430	1	2	21	21	1	1	44485311	44485311	+	44485311	44485311	43065201	43065201	+	1	First Pass	Primary Assembly
rs773734233	1	1	21	21	1	1	44485349	44485349	+	44485349	44485349	6456917	6456917	+	1	Second Pass	Primary Assembly
rs773734233	1	2	21	21	1	1	44485349	44485349	+	44485349	44485349	43065239	43065239	+	1	First Pass	Primary Assembly
rs234706	1	1	21	21	1	1	44485350	44485350	+	44485350	44485350	6456918	6456918	+	1	Second Pass	Primary Assembly
rs234706	1	2	21	21	1	1	44485350	44485350	+	44485350	44485350	43065240	43065240	+	1	First Pass	Primary Assembly
rs775351239	1	1	21	21	1	1	44485360	44485360	+	44485360	44485360	6456928	6456928	+	1	Second Pass	Primary Assembly
rs775351239	1	2	21	21	1	1	44485360	44485360	+	44485360	44485360	43065250	43065250	+	1	First Pass	Primary Assembly
rs145303290	1	1	21	21	1	1	44485374	44485374	+	44485374	44485374	6456942	6456942	+	1	Second Pass	Primary Assembly
rs145303290	1	2	21	21	1	1	44485374	44485374	+	44485374	44485374	43065264	43065264	+	1	First Pass	Primary Assembly
rs139456571	1	1	21	21	1	1	44485379	44485379	+	44485379	44485379	6456947	6456947	+	1	Second Pass	Primary Assembly
rs139456571	1	2	21	21	1	1	44485379	44485379	+	44485379	44485379	43065269	43065269	+	1	First Pass	Primary Assembly
rs764160782	1	1	21	21	8	8	44485389	44485396	+	44485389	44485396	6456957	6456964	+	1	Second Pass	Primary Assembly
rs764160782	1	2	21	21	8	8	44485389	44485396	+	44485389	44485396	43065279	43065286	+	1	First Pass	Primary Assembly
rs376011228	1	1	21	21	4	4	44485389	44485392	+	44485389	44485392	6456957	6456960	+	1	Second Pass	Primary Assembly
rs376011228	1	2	21	21	4	4	44485389	44485392	+	44485389	44485392	43065279	43065282	+	1	First Pass	Primary Assembly
rs2298758	1	1	21	21	1	1	44485527	44485527	+	44485527	44485527	6457095	6457095	+	1	Second Pass	Primary Assembly
rs2298758	1	2	21	21	1	1	44485527	44485527	+	44485527	44485527	43065417	43065417	+	1	First Pass	Primary Assembly
rs369220569	1	1	21	21	1	1	44485547	44485547	+	44485547	44485547	6457115	6457115	+	1	Second Pass	Primary Assembly
rs369220569	1	2	21	21	1	1	44485547	44485547	+	44485547	44485547	43065437	43065437	+	1	First Pass	Primary Assembly
rs372679328	1	1	21	21	1	1	44485553	44485553	+	44485553	44485553	6457121	6457121	+	1	Second Pass	Primary Assembly
rs372679328	1	2	21	21	1	1	44485553	44485553	+	44485553	44485553	43065443	43065443	+	1	First Pass	Primary Assembly
rs73906420	1	1	21	21	1	1	44485590	44485590	+	44485590	44485590	6457158	6457158	+	1	Second Pass	Primary Assembly
rs73906420	1	2	21	21	1	1	44485590	44485590	+	44485590	44485590	43065480	43065480	+	1	First Pass	Primary Assembly
rs121964973	1	1	21	21	1	1	44485591	44485591	+	44485591	44485591	6457159	6457159	+	1	Second Pass	Primary Assembly
rs121964973	1	2	21	21	1	1	44485591	44485591	+	44485591	44485591	43065481	43065481	+	1	First Pass	Primary Assembly
rs794727835	1	1	21	21	18	18	44485610	44485627	+	44485610	44485627	6457178	6457195	+	1	Second Pass	Primary Assembly
rs794727835	1	2	21	21	18	18	44485610	44485627	+	44485610	44485627	43065500	43065517	+	1	First Pass	Primary Assembly
rs186114513	1	1	21	21	1	1	44485715	44485715	+	44485715	44485715	6457283	6457283	+	1	Second Pass	Primary Assembly
rs186114513	1	2	21	21	1	1	44485715	44485715	+	44485715	44485715	43065605	43065605	+	1	First Pass	Primary Assembly
rs762065361	1	1	21	21	1	1	44485731	44485731	+	44485731	44485731	6457299	6457299	+	1	Second Pass	Primary Assembly
rs762065361	1	2	21	21	1	1	44485731	44485731	+	44485731	44485731	43065621	43065621	+	1	First Pass	Primary Assembly
rs121964970	1	1	21	21	1	1	44485755	44485755	+	44485755	44485755	6457323	6457323	+	1	Second Pass	Primary Assembly
rs121964970	1	2	21	21	1	1	44485755	44485755	+	44485755	44485755	43065645	43065645	+	1	First Pass	Primary Assembly
rs745704046	1	1	21	21	1	1	44485800	44485800	+	44485800	44485800	6457368	6457368	+	1	Second Pass	Primary Assembly
rs745704046	1	2	21	21	1	1	44485800	44485800	+	44485800	44485800	43065690	43065690	+	1	First Pass	Primary Assembly
rs234708	1	1	21	21	1	1	44486324	44486324	+	44486324	44486324	6457892	6457892	+	1	Second Pass	Primary Assembly
rs234708	1	2	21	21	1	1	44486324	44486324	+	44486324	44486324	43066214	43066214	+	1	First Pass	Primary Assembly
rs148782895	1	1	21	21	1	1	44486369	44486369	+	44486369	44486369	6457937	6457937	+	1	Second Pass	Primary Assembly
rs148782895	1	2	21	21	1	1	44486369	44486369	+	44486369	44486369	43066259	43066259	+	1	First Pass	Primary Assembly
rs121964963	1	1	21	21	1	1	44486370	44486370	+	44486370	44486370	6457938	6457938	+	1	Second Pass	Primary Assembly
rs121964963	1	2	21	21	1	1	44486370	44486370	+	44486370	44486370	43066260	43066260	+	1	First Pass	Primary Assembly
rs121964966	1	1	21	21	1	1	44486374	44486374	+	44486374	44486374	6457942	6457942	+	1	Second Pass	Primary Assembly
rs121964966	1	2	21	21	1	1	44486374	44486374	+	44486374	44486374	43066264	43066264	+	1	First Pass	Primary Assembly
rs121964965	1	1	21	21	1	1	44486389	44486389	+	44486389	44486389	6457957	6457957	+	1	Second Pass	Primary Assembly
rs121964965	1	2	21	21	1	1	44486389	44486389	+	44486389	44486389	43066279	43066279	+	1	First Pass	Primary Assembly
rs766958673	1	1	21	21	1	1	44486403	44486403	+	44486403	44486403	6457971	6457971	+	1	Second Pass	Primary Assembly
rs766958673	1	2	21	21	1	1	44486403	44486403	+	44486403	44486403	43066293	43066293	+	1	First Pass	Primary Assembly
rs147474549	1	1	21	21	1	1	44486404	44486404	+	44486404	44486404	6457972	6457972	+	1	Second Pass	Primary Assembly
rs147474549	1	2	21	21	1	1	44486404	44486404	+	44486404	44486404	43066294	43066294	+	1	First Pass	Primary Assembly
rs539326697	1	1	21	21	1	1	44486407	44486407	+	44486407	44486407	6457975	6457975	+	1	Second Pass	Primary Assembly
rs539326697	1	2	21	21	1	1	44486407	44486407	+	44486407	44486407	43066297	43066297	+	1	First Pass	Primary Assembly
rs140002610	1	1	21	21	1	1	44486410	44486410	+	44486410	44486410	6457978	6457978	+	1	Second Pass	Primary Assembly
rs140002610	1	2	21	21	1	1	44486410	44486410	+	44486410	44486410	43066300	43066300	+	1	First Pass	Primary Assembly
rs781444670	1	1	21	21	1	1	44486430	44486430	+	44486430	44486430	6457998	6457998	+	1	Second Pass	Primary Assembly
rs781444670	1	2	21	21	1	1	44486430	44486430	+	44486430	44486430	43066320	43066320	+	1	First Pass	Primary Assembly
rs770095972	1	1	21	21	1	1	44486442	44486442	+	44486442	44486442	6458010	6458010	+	1	Second Pass	Primary Assembly
rs770095972	1	2	21	21	1	1	44486442	44486442	+	44486442	44486442	43066332	43066332	+	1	First Pass	Primary Assembly
rs775992753	1	1	21	21	1	1	44486443	44486443	+	44486443	44486443	6458011	6458011	+	1	Second Pass	Primary Assembly
rs775992753	1	2	21	21	1	1	44486443	44486443	+	44486443	44486443	43066333	43066333	+	1	First Pass	Primary Assembly
rs760214620	1	1	21	21	1	1	44486458	44486458	+	44486458	44486458	6458026	6458026	+	1	Second Pass	Primary Assembly
rs760214620	1	2	21	21	1	1	44486458	44486458	+	44486458	44486458	43066348	43066348	+	1	First Pass	Primary Assembly
rs121964964	1	1	21	21	1	1	44486463	44486463	+	44486463	44486463	6458031	6458031	+	1	Second Pass	Primary Assembly
rs121964964	1	2	21	21	1	1	44486463	44486463	+	44486463	44486463	43066353	43066353	+	1	First Pass	Primary Assembly
rs778220779	1	1	21	21	1	1	44486479	44486479	+	44486479	44486479	6458047	6458047	+	1	Second Pass	Primary Assembly
rs778220779	1	2	21	21	1	1	44486479	44486479	+	44486479	44486479	43066369	43066369	+	1	First Pass	Primary Assembly
rs786204609	1	1	21	21	1	1	44488629	44488629	+	44488629	44488629	6460197	6460197	+	1	Second Pass	Primary Assembly
rs786204609	1	2	21	21	1	1	44488629	44488629	+	44488629	44488629	43068519	43068519	+	1	First Pass	Primary Assembly
rs34040148	1	1	21	21	1	1	44488631	44488631	+	44488631	44488631	6460199	6460199	+	1	Second Pass	Primary Assembly
rs34040148	1	2	21	21	1	1	44488631	44488631	+	44488631	44488631	43068521	43068521	+	1	First Pass	Primary Assembly
rs786204757	1	1	21	21	1	1	44488633	44488633	+	44488633	44488633	6460201	6460201	+	1	Second Pass	Primary Assembly
rs786204757	1	2	21	21	1	1	44488633	44488633	+	44488633	44488633	43068523	43068523	+	1	First Pass	Primary Assembly
rs772450760	1	1	21	21	1	1	44488669	44488669	+	44488669	44488669	6460237	6460237	+	1	Second Pass	Primary Assembly
rs772450760	1	2	21	21	1	1	44488669	44488669	+	44488669	44488669	43068559	43068559	+	1	First Pass	Primary Assembly
rs863223435	1	1	21	21	1	1	44488682	44488682	+	44488682	44488682	6460250	6460250	+	1	Second Pass	Primary Assembly
rs863223435	1	2	21	21	1	1	44488682	44488682	+	44488682	44488682	43068572	43068572	+	1	First Pass	Primary Assembly
rs786204608	1	1	21	21	1	1	44488702	44488702	+	44488702	44488702	6460270	6460270	+	1	Second Pass	Primary Assembly
rs786204608	1	2	21	21	1	1	44488702	44488702	+	44488702	44488702	43068592	43068592	+	1	First Pass	Primary Assembly
rs192232907	1	1	21	21	1	1	44488720	44488720	+	44488720	44488720	6460288	6460288	+	1	Second Pass	Primary Assembly
rs192232907	1	2	21	21	1	1	44488720	44488720	+	44488720	44488720	43068610	43068610	+	1	First Pass	Primary Assembly
rs2229413	1	1	21	21	1	1	44492095	44492095	+	44492095	44492095	6463663	6463663	+	1	Second Pass	Primary Assembly
rs2229413	1	2	21	21	1	1	44492095	44492095	+	44492095	44492095	43071985	43071985	+	1	First Pass	Primary Assembly
rs199948079	1	1	21	21	1	1	44492142	44492142	+	44492142	44492142	6463710	6463710	+	1	Second Pass	Primary Assembly
rs199948079	1	2	21	21	1	1	44492142	44492142	+	44492142	44492142	43072032	43072032	+	1	First Pass	Primary Assembly
rs148865119	1	1	21	21	1	1	44492158	44492158	+	44492158	44492158	6463726	6463726	+	1	Second Pass	Primary Assembly
rs148865119	1	2	21	21	1	1	44492158	44492158	+	44492158	44492158	43072048	43072048	+	1	First Pass	Primary Assembly
rs201372812	1	1	21	21	1	1	44492171	44492171	+	44492171	44492171	6463739	6463739	+	1	Second Pass	Primary Assembly
rs201372812	1	2	21	21	1	1	44492171	44492171	+	44492171	44492171	43072061	43072061	+	1	First Pass	Primary Assembly
rs763151207	1	1	21	21	1	1	44492239	44492239	+	44492239	44492239	6463807	6463807	+	1	Second Pass	Primary Assembly
rs763151207	1	2	21	21	1	1	44492239	44492239	+	44492239	44492239	43072129	43072129	+	1	First Pass	Primary Assembly
rs558259739	1	1	21	21	1	1	44492270	44492270	+	44492270	44492270	6463838	6463838	+	1	Second Pass	Primary Assembly
rs558259739	1	2	21	21	1	1	44492270	44492270	+	44492270	44492270	43072160	43072160	+	1	First Pass	Primary Assembly
rs546530618	1	1	21	21	1	1	44492299	44492299	+	44492299	44492299	6463867	6463867	+	1	Second Pass	Primary Assembly
rs546530618	1	2	21	21	1	1	44492299	44492299	+	44492299	44492299	43072189	43072189	+	1	First Pass	Primary Assembly
rs769766030	1	1	21	21	1	1	44492302	44492302	+	44492302	44492302	6463870	6463870	+	1	Second Pass	Primary Assembly
rs769766030	1	2	21	21	1	1	44492302	44492302	+	44492302	44492302	43072192	43072192	+	1	First Pass	Primary Assembly
rs74315440	1	1	21	21	1	1	44589236	44589236	+	44589236	44589236	6560809	6560809	+	1	Second Pass	Primary Assembly
rs74315440	1	2	21	21	1	1	44589236	44589236	+	44589236	44589236	43169126	43169126	+	1	First Pass	Primary Assembly
rs397515624	1	1	21	21	1	1	44589243	44589243	+	44589243	44589243	6560816	6560816	+	1	Second Pass	Primary Assembly
rs397515624	1	2	21	21	1	1	44589243	44589243	+	44589243	44589243	43169133	43169133	+	1	First Pass	Primary Assembly
rs397515625	1	1	21	21	1	1	44589270	44589270	+	44589270	44589270	6560843	6560843	+	1	Second Pass	Primary Assembly
rs397515625	1	2	21	21	1	1	44589270	44589270	+	44589270	44589270	43169160	43169160	+	1	First Pass	Primary Assembly
rs397515626	1	1	21	21	1	1	44589271	44589271	+	44589271	44589271	6560844	6560844	+	1	Second Pass	Primary Assembly
rs397515626	1	2	21	21	1	1	44589271	44589271	+	44589271	44589271	43169161	43169161	+	1	First Pass	Primary Assembly
rs864309685	1	1	21	21	1	1	44589351	44589351	+	44589351	44589351	6560924	6560924	+	1	Second Pass	Primary Assembly
rs864309685	1	2	21	21	1	1	44589351	44589351	+	44589351	44589351	43169241	43169241	+	1	First Pass	Primary Assembly
rs74315441	1	1	21	21	1	1	44589354	44589354	+	44589354	44589354	6560927	6560927	+	1	Second Pass	Primary Assembly
rs74315441	1	2	21	21	1	1	44589354	44589354	+	44589354	44589354	43169244	43169244	+	1	First Pass	Primary Assembly
rs397515623	1	1	21	21	1	1	44589369	44589369	+	44589369	44589369	6560942	6560942	+	1	Second Pass	Primary Assembly
rs397515623	1	2	21	21	1	1	44589369	44589369	+	44589369	44589369	43169259	43169259	+	1	First Pass	Primary Assembly
rs398122947	1	1	21	21	1	1	44590729	44590729	+	44590729	44590729	6562303	6562303	+	1	Second Pass	Primary Assembly
rs398122947	1	2	21	21	1	1	44590729	44590729	+	44590729	44590729	43170619	43170619	+	1	First Pass	Primary Assembly
rs74315439	1	1	21	21	1	1	44592214	44592214	+	44592214	44592214	6563788	6563788	+	1	Second Pass	Primary Assembly
rs74315439	1	2	21	21	1	1	44592214	44592214	+	44592214	44592214	43172104	43172104	+	1	First Pass	Primary Assembly
rs121912973	1	1	21	21	1	1	44592215	44592215	+	44592215	44592215	6563789	6563789	+	1	Second Pass	Primary Assembly
rs121912973	1	2	21	21	1	1	44592215	44592215	+	44592215	44592215	43172105	43172105	+	1	First Pass	Primary Assembly
rs786205163	1	1	21	21	1	1	44837493	44837493	+	44837493	44837493	6120648	6120648	-	1	Second Pass	Primary Assembly
rs786205163	1	2	21	21	1	1	44837493	44837493	+	44837493	44837493	43417613	43417613	+	1	First Pass	Primary Assembly
rs786205162	1	1	21	21	1	1	44837502	44837502	+	44837502	44837502	6120639	6120639	-	1	Second Pass	Primary Assembly
rs786205162	1	2	21	21	1	1	44837502	44837502	+	44837502	44837502	43417622	43417622	+	1	First Pass	Primary Assembly
rs786205161	1	1	21	21	1	1	44837559	44837559	+	44837559	44837559	6120582	6120582	-	1	Second Pass	Primary Assembly
rs786205161	1	2	21	21	1	1	44837559	44837559	+	44837559	44837559	43417679	43417679	+	1	First Pass	Primary Assembly
rs786205160	1	1	21	21	1	1	44839819	44839819	+	44839819	44839819	6118322	6118322	-	1	Second Pass	Primary Assembly
rs786205160	1	2	21	21	1	1	44839819	44839819	+	44839819	44839819	43419939	43419939	+	1	First Pass	Primary Assembly
rs786205159	1	1	21	21	1	1	44840227	44840227	+	44840227	44840227	6117914	6117914	-	1	Second Pass	Primary Assembly
rs786205159	1	2	21	21	1	1	44840227	44840227	+	44840227	44840227	43420347	43420347	+	1	First Pass	Primary Assembly
rs372055	1	1	22	HSCHR22_UNLOCALIZED_CTG4	1	1	18900750	18900750	+	18900750	18900750	138542	138542	+	1	Second Pass	Primary Assembly
rs372055	1	2	22	22	1	1	18900750	18900750	+	18900750	18900750	18913237	18913237	+	1	First Pass	Primary Assembly
rs450046	1	1	22	HSCHR22_UNLOCALIZED_CTG4	1	1	18901004	18901004	+	18901004	18901004	138796	138796	+	1	Second Pass	Primary Assembly
rs450046	1	2	22	22	1	1	18901004	18901004	+	18901004	18901004	18913491	18913491	+	1	First Pass	Primary Assembly
rs193919334	1	1	22	HSCHR22_UNLOCALIZED_CTG4	1	1	18901005	18901005	+	18901005	18901005	138797	138797	+	1	Second Pass	Primary Assembly
rs193919334	1	2	22	22	1	1	18901005	18901005	+	18901005	18901005	18913492	18913492	+	1	First Pass	Primary Assembly
rs2870984	1	1	22	HSCHR22_UNLOCALIZED_CTG4	1	1	18905859	18905859	+	18905859	18905859	143644	143644	+	1	Second Pass	Primary Assembly
rs2870984	1	2	22	22	1	1	18905859	18905859	+	18905859	18905859	18918346	18918346	+	1	First Pass	Primary Assembly
rs1807467	1	1	22	HSCHR22_UNLOCALIZED_CTG4	1	1	18905893	18905893	+	18905893	18905893	143678	143678	+	1	Second Pass	Primary Assembly
rs1807467	1	2	22	22	1	1	18905893	18905893	+	18905893	18905893	18918380	18918380	+	1	First Pass	Primary Assembly
rs3970559	1	1	22	HSCHR22_UNLOCALIZED_CTG4	1	1	18905899	18905899	+	18905899	18905899	143684	143684	+	1	Second Pass	Primary Assembly
rs3970559	1	2	22	22	1	1	18905899	18905899	+	18905899	18905899	18918386	18918386	+	1	First Pass	Primary Assembly
rs2904551	1	1	22	HSCHR22_UNLOCALIZED_CTG4	1	1	18905934	18905934	+	18905934	18905934	143719	143719	+	1	Second Pass	Primary Assembly
rs2904551	1	2	22	22	1	1	18905934	18905934	+	18905934	18905934	18918421	18918421	+	1	First Pass	Primary Assembly
rs2904552	1	1	22	HSCHR22_UNLOCALIZED_CTG4	1	1	18905964	18905964	+	18905964	18905964	143749	143749	+	1	Second Pass	Primary Assembly
rs2904552	1	2	22	22	1	1	18905964	18905964	+	18905964	18905964	18918451	18918451	+	1	First Pass	Primary Assembly
rs137852934	1	1	22	HSCHR22_UNLOCALIZED_CTG4	1	1	18909902	18909902	+	18909902	18909902	147688	147688	+	1	Second Pass	Primary Assembly
rs137852934	1	2	22	22	1	1	18909902	18909902	+	18909902	18909902	18922389	18922389	+	1	First Pass	Primary Assembly
rs724159983	1	1	X	X	1	1	153448055	153448055	+	153448055	153448055	154257508	154257508	+	1	Second Pass	Primary Assembly
rs724159983	1	2	X	X	1	1	153448055	153448055	+	153448055	153448055	154182566	154182566	+	1	First Pass	Primary Assembly
rs104894915	1	1	X	X	1	1	153453428	153453428	+	153453428	153453428	154262881	154262881	+	1	Second Pass	Primary Assembly
rs104894915	1	2	X	X	1	1	153453428	153453428	+	153453428	153453428	154187939	154187939	+	1	First Pass	Primary Assembly
rs267606927	1	1	X	X	1	1	153455662	153455662	+	153455662	153455662	154265115	154265115	+	1	Second Pass	Primary Assembly
rs267606927	1	2	X	X	1	1	153455662	153455662	+	153455662	153455662	154190173	154190173	+	1	First Pass	Primary Assembly
rs104894914	1	1	X	X	1	1	153457207	153457207	+	153457207	153457207	154266660	154266660	+	1	Second Pass	Primary Assembly
rs104894914	1	2	X	X	1	1	153457207	153457207	+	153457207	153457207	154191716	154191716	+	1	First Pass	Primary Assembly
rs104894916	1	1	X	X	1	1	153461425	153461425	+	153461425	153461425	154270878	154270878	+	1	Second Pass	Primary Assembly
rs104894916	1	2	X	X	1	1	153461425	153461425	+	153461425	153461425	154195934	154195934	+	1	First Pass	Primary Assembly
