# Supplementary material for: Evaluation of GRCh38 and de novo haploid genome assemblies demonstrates the enduring quality of the reference assembly
Source: Genome Res. 2017 May;27(5):849–64. doi: 10.1101/gr.213611.116 (PMC5411779; doi:10.1101/gr.213611.116)
Supplement: Supplemental Material [file supp_gr.213611.116_Supplemental_Worksheet_S5.xlsx]

## Sheet: unaligned_seqs_primary
#Accession	GeneID	Assembly
NM_012146.1	26584	GRCh38
NM_022555.3	3125	GRCh38
NM_021983.4	3126	GRCh38
NM_001013357.1	504190	GRCh38
NM_012148.2	26582	GRCh38
NM_012149.2	26581	GRCh38
NM_020535.3	57292	GRCh38
NM_001018081.1	553128	GRCh38
NR_036753.1	401983	GRCh38
NM_001243965.1	3123	GRCh38
NM_176886.2	259291	GRCh38
NM_001013356.2	504189	GRCh38
NM_000853.3	2952	GRCh38
NM_001293807.1	2952	GRCh38
NM_001293808.1	2952	GRCh38
NM_001293809.1	2952	GRCh38
NM_001293810.1	2952	GRCh38
NM_001293811.1	2952	GRCh38
NM_001293812.1	2952	GRCh38
NM_001293813.1	2952	GRCh38
NM_001293814.1	2952	GRCh38
NR_132348.1	106099130	GRCh38
NM_012146.1	26584	CHM1_1.1
NM_022555.3	3125	CHM1_1.1
NM_178433.1	353143	CHM1_1.1
NM_021983.4	3126	CHM1_1.1
NM_001005922.1	387264	CHM1_1.1
NM_001013357.1	504190	CHM1_1.1
NM_012148.2	26582	CHM1_1.1
NM_012149.2	26581	CHM1_1.1
NM_020535.3	57292	CHM1_1.1
NM_001018081.1	553128	CHM1_1.1
NM_001024601.2	149643	CHM1_1.1
NR_003054.1	692106	CHM1_1.1
NM_176884.2	259289	CHM1_1.1
NM_001001480.2	439915	CHM1_1.1
NM_001080835.1	643905	CHM1_1.1
NR_003285.2	100008587	CHM1_1.1
NR_002754.2	26829	CHM1_1.1
NM_003435.3	7693	CHM1_1.1
NM_031963.2	83901	CHM1_1.1
NR_003682.1	403340	CHM1_1.1
NR_003711.1	100124541	CHM1_1.1
NR_002743.2	26799	CHM1_1.1
NM_018300.3	55769	CHM1_1.1
NR_004846.2	100134868	CHM1_1.1
NR_024044.2	245912	CHM1_1.1
NR_002716.3	6066	CHM1_1.1
NM_178434.2	353144	CHM1_1.1
NR_030330.1	693127	CHM1_1.1
NR_031630.1	100302275	CHM1_1.1
NR_034004.1	100132741	CHM1_1.1
NR_034005.1	441501	CHM1_1.1
NR_036238.1	100422826	CHM1_1.1
NR_036753.1	401983	CHM1_1.1
NR_037425.1	100500842	CHM1_1.1
NM_001910.3	1510	CHM1_1.1
NM_148964.2	1510	CHM1_1.1
NR_037925.1	647476	CHM1_1.1
NM_001242480.1	389831	CHM1_1.1
NR_038958.1	100507412	CHM1_1.1
NM_001243965.1	3123	CHM1_1.1
NR_049860.1	100847058	CHM1_1.1
NR_102368.1	101340250	CHM1_1.1
NM_001013356.2	504189	CHM1_1.1
NM_180699.3	11066	CHM1_1.1
NM_022717.3	11066	CHM1_1.1
NR_104103.1	11066	CHM1_1.1
NM_001286997.1	101928436	CHM1_1.1
NR_106951.1	102465537	CHM1_1.1
NR_107057.1	102465906	CHM1_1.1
NR_107031.1	102465866	CHM1_1.1
NR_106735.1	102464835	CHM1_1.1
NR_109758.1	644919	CHM1_1.1
NM_178356.3	199834	CHM1_1.1
NM_001080514.2	642658	CHM1_1.1
NR_110592.1	102723927	CHM1_1.1
NR_110984.1	103021296	CHM1_1.1
NR_110983.1	103021296	CHM1_1.1
NM_001291516.1	399693	CHM1_1.1
NR_111982.1	399693	CHM1_1.1
NR_027454.2	731656	CHM1_1.1
NR_027434.2	100131532	CHM1_1.1
NM_130777.2	9502	CHM1_1.1
NM_000853.3	2952	CHM1_1.1
NM_001293807.1	2952	CHM1_1.1
NM_001293808.1	2952	CHM1_1.1
NM_001293809.1	2952	CHM1_1.1
NM_001293810.1	2952	CHM1_1.1
NM_001293811.1	2952	CHM1_1.1
NM_001293812.1	2952	CHM1_1.1
NM_001293813.1	2952	CHM1_1.1
NM_001293814.1	2952	CHM1_1.1
NM_001301188.1	57761	CHM1_1.1
NM_001301190.1	57761	CHM1_1.1
NM_001301193.1	57761	CHM1_1.1
NM_001301196.1	57761	CHM1_1.1
NR_036245.2	100422858	CHM1_1.1
NR_031600.2	100302196	CHM1_1.1
NR_128706.1	100526648	CHM1_1.1
NR_106782.1	102465433	CHM1_1.1
NR_128716.1	103504739	CHM1_1.1
NR_128717.1	103504733	CHM1_1.1
NR_128715.1	103504727	CHM1_1.1
NR_024086.2	53844	CHM1_1.1
NR_130463.1	100422838	CHM1_1.1
NM_145058.2	196383	CHM1_1.1
NR_130703.1	196383	CHM1_1.1
NM_001304839.1	338382	CHM1_1.1
NM_177403.5	338382	CHM1_1.1
NM_001164522.2	338382	CHM1_1.1
NR_132348.1	106099130	CHM1_1.1
NM_022555.3	3125	PacBioCHM1_r2_GenBank_08312015
NM_178433.1	353143	PacBioCHM1_r2_GenBank_08312015
NM_001005204.1	219417	PacBioCHM1_r2_GenBank_08312015
NM_021983.4	3126	PacBioCHM1_r2_GenBank_08312015
NM_001012710.1	387273	PacBioCHM1_r2_GenBank_08312015
NM_020535.3	57292	PacBioCHM1_r2_GenBank_08312015
NM_001018081.1	553128	PacBioCHM1_r2_GenBank_08312015
NM_001024601.2	149643	PacBioCHM1_r2_GenBank_08312015
NR_003054.1	692106	PacBioCHM1_r2_GenBank_08312015
NM_176884.2	259289	PacBioCHM1_r2_GenBank_08312015
NM_001001480.2	439915	PacBioCHM1_r2_GenBank_08312015
NM_001080835.1	643905	PacBioCHM1_r2_GenBank_08312015
NR_002754.2	26829	PacBioCHM1_r2_GenBank_08312015
NM_005416.2	6707	PacBioCHM1_r2_GenBank_08312015
NM_001097589.1	6707	PacBioCHM1_r2_GenBank_08312015
NM_031963.2	83901	PacBioCHM1_r2_GenBank_08312015
NR_002743.2	26799	PacBioCHM1_r2_GenBank_08312015
NM_018300.3	55769	PacBioCHM1_r2_GenBank_08312015
NR_024044.2	245912	PacBioCHM1_r2_GenBank_08312015
NM_178434.2	353144	PacBioCHM1_r2_GenBank_08312015
NR_030330.1	693127	PacBioCHM1_r2_GenBank_08312015
NR_031630.1	100302275	PacBioCHM1_r2_GenBank_08312015
NR_036238.1	100422826	PacBioCHM1_r2_GenBank_08312015
NR_036753.1	401983	PacBioCHM1_r2_GenBank_08312015
NR_037469.1	100500906	PacBioCHM1_r2_GenBank_08312015
NR_037425.1	100500842	PacBioCHM1_r2_GenBank_08312015
NM_001243965.1	3123	PacBioCHM1_r2_GenBank_08312015
NM_153456.3	266722	PacBioCHM1_r2_GenBank_08312015
NR_049860.1	100847058	PacBioCHM1_r2_GenBank_08312015
NR_073405.1	441733	PacBioCHM1_r2_GenBank_08312015
NR_073432.1	100130935	PacBioCHM1_r2_GenBank_08312015
NM_001009931.2	388697	PacBioCHM1_r2_GenBank_08312015
NM_001277331.1	100507608	PacBioCHM1_r2_GenBank_08312015
NR_106951.1	102465537	PacBioCHM1_r2_GenBank_08312015
NR_107031.1	102465866	PacBioCHM1_r2_GenBank_08312015
NR_106735.1	102464835	PacBioCHM1_r2_GenBank_08312015
NR_109758.1	644919	PacBioCHM1_r2_GenBank_08312015
NM_178356.3	199834	PacBioCHM1_r2_GenBank_08312015
NR_110390.1	101928201	PacBioCHM1_r2_GenBank_08312015
NR_110592.1	102723927	PacBioCHM1_r2_GenBank_08312015
NM_001166386.3	4111	PacBioCHM1_r2_GenBank_08312015
NM_005367.6	4111	PacBioCHM1_r2_GenBank_08312015
NM_001166387.3	4111	PacBioCHM1_r2_GenBank_08312015
NM_000853.3	2952	PacBioCHM1_r2_GenBank_08312015
NM_001293807.1	2952	PacBioCHM1_r2_GenBank_08312015
NM_001293808.1	2952	PacBioCHM1_r2_GenBank_08312015
NM_001293809.1	2952	PacBioCHM1_r2_GenBank_08312015
NM_001293810.1	2952	PacBioCHM1_r2_GenBank_08312015
NM_001293811.1	2952	PacBioCHM1_r2_GenBank_08312015
NM_001293812.1	2952	PacBioCHM1_r2_GenBank_08312015
NM_001293813.1	2952	PacBioCHM1_r2_GenBank_08312015
NM_001293814.1	2952	PacBioCHM1_r2_GenBank_08312015
NM_153478.2	158511	PacBioCHM1_r2_GenBank_08312015
NM_001102576.2	158511	PacBioCHM1_r2_GenBank_08312015
NM_001301188.1	57761	PacBioCHM1_r2_GenBank_08312015
NM_001301190.1	57761	PacBioCHM1_r2_GenBank_08312015
NM_001301193.1	57761	PacBioCHM1_r2_GenBank_08312015
NM_001301196.1	57761	PacBioCHM1_r2_GenBank_08312015
NR_125776.1	103724390	PacBioCHM1_r2_GenBank_08312015
NR_036245.2	100422858	PacBioCHM1_r2_GenBank_08312015
NR_031600.2	100302196	PacBioCHM1_r2_GenBank_08312015
NR_036061.2	100423008	PacBioCHM1_r2_GenBank_08312015
NR_130463.1	100422838	PacBioCHM1_r2_GenBank_08312015
NR_131189.1	105372795	PacBioCHM1_r2_GenBank_08312015
NR_132348.1	106099130	PacBioCHM1_r2_GenBank_08312015
NM_012146.1	26584	CA P6 CHM1 Conservative 2.5%
NM_022555.3	3125	CA P6 CHM1 Conservative 2.5%
NM_178433.1	353143	CA P6 CHM1 Conservative 2.5%
NM_018419.2	54345	CA P6 CHM1 Conservative 2.5%
NM_001005204.1	219417	CA P6 CHM1 Conservative 2.5%
NM_021983.4	3126	CA P6 CHM1 Conservative 2.5%
NM_001012710.1	387273	CA P6 CHM1 Conservative 2.5%
NM_012148.2	26582	CA P6 CHM1 Conservative 2.5%
NM_012149.2	26581	CA P6 CHM1 Conservative 2.5%
NM_020535.3	57292	CA P6 CHM1 Conservative 2.5%
NM_001018081.1	553128	CA P6 CHM1 Conservative 2.5%
NM_001024601.2	149643	CA P6 CHM1 Conservative 2.5%
NM_080431.4	140625	CA P6 CHM1 Conservative 2.5%
NR_003054.1	692106	CA P6 CHM1 Conservative 2.5%
NM_176884.2	259289	CA P6 CHM1 Conservative 2.5%
NM_024297.2	79142	CA P6 CHM1 Conservative 2.5%
NM_001001480.2	439915	CA P6 CHM1 Conservative 2.5%
NM_001080835.1	643905	CA P6 CHM1 Conservative 2.5%
NR_003347.1	100033806	CA P6 CHM1 Conservative 2.5%
NR_003352.1	100033811	CA P6 CHM1 Conservative 2.5%
NR_003348.1	100033807	CA P6 CHM1 Conservative 2.5%
NR_003350.1	100033809	CA P6 CHM1 Conservative 2.5%
NR_002754.2	26829	CA P6 CHM1 Conservative 2.5%
NM_005416.2	6707	CA P6 CHM1 Conservative 2.5%
NM_001097589.1	6707	CA P6 CHM1 Conservative 2.5%
NM_031963.2	83901	CA P6 CHM1 Conservative 2.5%
NR_003710.1	100124540	CA P6 CHM1 Conservative 2.5%
NR_002743.2	26799	CA P6 CHM1 Conservative 2.5%
NM_018300.3	55769	CA P6 CHM1 Conservative 2.5%
NM_052839.3	56666	CA P6 CHM1 Conservative 2.5%
NM_006179.4	4909	CA P6 CHM1 Conservative 2.5%
NM_017914.3	55009	CA P6 CHM1 Conservative 2.5%
NR_024044.2	245912	CA P6 CHM1 Conservative 2.5%
NM_001145054.1	388963	CA P6 CHM1 Conservative 2.5%
NM_001160300.1	56666	CA P6 CHM1 Conservative 2.5%
NM_178434.2	353144	CA P6 CHM1 Conservative 2.5%
NR_028597.1	6719	CA P6 CHM1 Conservative 2.5%
NR_030330.1	693127	CA P6 CHM1 Conservative 2.5%
NR_030361.1	693120	CA P6 CHM1 Conservative 2.5%
NR_030384.1	724032	CA P6 CHM1 Conservative 2.5%
NR_031608.1	100313824	CA P6 CHM1 Conservative 2.5%
NR_031630.1	100302275	CA P6 CHM1 Conservative 2.5%
NR_031654.1	100302208	CA P6 CHM1 Conservative 2.5%
NR_031688.1	100302277	CA P6 CHM1 Conservative 2.5%
NR_036238.1	100422826	CA P6 CHM1 Conservative 2.5%
NR_036753.1	401983	CA P6 CHM1 Conservative 2.5%
NR_037469.1	100500906	CA P6 CHM1 Conservative 2.5%
NR_037425.1	100500842	CA P6 CHM1 Conservative 2.5%
NM_020360.3	57048	CA P6 CHM1 Conservative 2.5%
NM_001201576.1	57048	CA P6 CHM1 Conservative 2.5%
NR_037719.1	100529211	CA P6 CHM1 Conservative 2.5%
NR_038368.1	649159	CA P6 CHM1 Conservative 2.5%
NR_039908.1	100616224	CA P6 CHM1 Conservative 2.5%
NM_001243965.1	3123	CA P6 CHM1 Conservative 2.5%
NM_153456.3	266722	CA P6 CHM1 Conservative 2.5%
NR_049860.1	100847058	CA P6 CHM1 Conservative 2.5%
NM_001312.3	1397	CA P6 CHM1 Conservative 2.5%
NM_001270841.1	1397	CA P6 CHM1 Conservative 2.5%
NR_073081.1	1397	CA P6 CHM1 Conservative 2.5%
NR_073082.1	1397	CA P6 CHM1 Conservative 2.5%
NR_073083.1	1397	CA P6 CHM1 Conservative 2.5%
NR_073405.1	441733	CA P6 CHM1 Conservative 2.5%
NM_001009931.2	388697	CA P6 CHM1 Conservative 2.5%
NM_001277331.1	100507608	CA P6 CHM1 Conservative 2.5%
NM_001277951.1	55769	CA P6 CHM1 Conservative 2.5%
NM_006332.4	10437	CA P6 CHM1 Conservative 2.5%
NR_104075.1	101954266	CA P6 CHM1 Conservative 2.5%
NM_001284517.1	79142	CA P6 CHM1 Conservative 2.5%
NM_001284518.1	79142	CA P6 CHM1 Conservative 2.5%
NR_104420.1	100506371	CA P6 CHM1 Conservative 2.5%
NM_001286559.1	150483	CA P6 CHM1 Conservative 2.5%
NM_144705.3	150483	CA P6 CHM1 Conservative 2.5%
NR_106951.1	102465537	CA P6 CHM1 Conservative 2.5%
NR_106879.1	102465493	CA P6 CHM1 Conservative 2.5%
NR_107056.1	102465882	CA P6 CHM1 Conservative 2.5%
NR_107031.1	102465866	CA P6 CHM1 Conservative 2.5%
NR_106735.1	102464835	CA P6 CHM1 Conservative 2.5%
NR_109758.1	644919	CA P6 CHM1 Conservative 2.5%
NR_109923.1	101928158	CA P6 CHM1 Conservative 2.5%
NR_109922.1	101928158	CA P6 CHM1 Conservative 2.5%
NR_109924.1	101928158	CA P6 CHM1 Conservative 2.5%
NM_001122890.2	124975	CA P6 CHM1 Conservative 2.5%
NM_001288704.1	124975	CA P6 CHM1 Conservative 2.5%
NM_153338.3	124975	CA P6 CHM1 Conservative 2.5%
NM_001288703.1	124975	CA P6 CHM1 Conservative 2.5%
NM_001288702.1	124975	CA P6 CHM1 Conservative 2.5%
NM_178356.3	199834	CA P6 CHM1 Conservative 2.5%
NR_110390.1	101928201	CA P6 CHM1 Conservative 2.5%
NR_110592.1	102723927	CA P6 CHM1 Conservative 2.5%
NR_026803.2	401507	CA P6 CHM1 Conservative 2.5%
NM_001291366.1	84808	CA P6 CHM1 Conservative 2.5%
NM_001291367.1	84808	CA P6 CHM1 Conservative 2.5%
NM_000853.3	2952	CA P6 CHM1 Conservative 2.5%
NM_001293807.1	2952	CA P6 CHM1 Conservative 2.5%
NM_001293808.1	2952	CA P6 CHM1 Conservative 2.5%
NM_001293809.1	2952	CA P6 CHM1 Conservative 2.5%
NM_001293810.1	2952	CA P6 CHM1 Conservative 2.5%
NM_001293811.1	2952	CA P6 CHM1 Conservative 2.5%
NM_001293812.1	2952	CA P6 CHM1 Conservative 2.5%
NM_001293813.1	2952	CA P6 CHM1 Conservative 2.5%
NM_001293814.1	2952	CA P6 CHM1 Conservative 2.5%
NM_001301188.1	57761	CA P6 CHM1 Conservative 2.5%
NM_001301190.1	57761	CA P6 CHM1 Conservative 2.5%
NM_001301193.1	57761	CA P6 CHM1 Conservative 2.5%
NM_001301196.1	57761	CA P6 CHM1 Conservative 2.5%
NR_125878.1	102724511	CA P6 CHM1 Conservative 2.5%
NR_036245.2	100422858	CA P6 CHM1 Conservative 2.5%
NR_031600.2	100302196	CA P6 CHM1 Conservative 2.5%
NM_138445.3	115330	CA P6 CHM1 Conservative 2.5%
NM_001303473.1	115330	CA P6 CHM1 Conservative 2.5%
NM_001303474.1	115330	CA P6 CHM1 Conservative 2.5%
NR_130463.1	100422838	CA P6 CHM1 Conservative 2.5%
NR_131189.1	105372795	CA P6 CHM1 Conservative 2.5%
NR_132348.1	106099130	CA P6 CHM1 Conservative 2.5%
NM_001316764.1	388963	CA P6 CHM1 Conservative 2.5%
NM_001316766.1	388963	CA P6 CHM1 Conservative 2.5%
NM_001316765.1	388963	CA P6 CHM1 Conservative 2.5%

## Sheet: split_aligns
#Transcript accession	GeneID	Assembly	Scaffold accession	Start	End	Strand	% identity	% coverage
NM_002929.2	6011	GRCh38	NT_024498.13	53	12644	+	99.7	48
NM_002929.2	6011	GRCh38	NT_027140.7	1823838	1828218	+	99.72	52.19
NM_001733.4	715	GRCh38	NT_009714.18	1210	7797	-	99.92	52.77
NM_001733.4	715	GRCh38	NT_009759.17	7070209	7072108	-	100	46.8
NM_022892.1	4671	GRCh38	NT_034772.7	19492953	19513639	+	99.71	18.18
NM_022892.1	4671	GRCh38	NT_034772.7	20858676	20915307	-	100	100
NM_004536.2	4671	GRCh38	NT_034772.7	19492953	19513639	+	99.26	16.62
NM_004536.2	4671	GRCh38	NT_034772.7	20858676	20915307	-	100	100
NM_001122636.1	50614	GRCh38	NT_029419.13	94961120	94968438	-	100	55.2
NM_001122636.1	50614	GRCh38	NT_024477.15	14315	104957	-	98.58	47.31
NM_001143962.1	388743	GRCh38	NT_167186.2	218	56799	-	100	66.87
NM_001143962.1	388743	GRCh38	NT_004487.20	80357022	80373580	-	99.87	33.12
NM_001285449.1	23042	GRCh38	NT_010393.17	14906647	14907136	-	98.77	23.25
NM_001285449.1	23042	GRCh38	NT_010393.17	14964963	15129349	+	100	100
NM_001077693.3	641700	GRCh38	NT_034772.7	89338747	89339367	-	100	43.58
NM_001077693.3	641700	GRCh38	NT_029289.12	943	9084	-	100	55.66
NM_001293739.1	641700	GRCh38	NT_034772.7	89338747	89339367	-	100	34.92
NM_001293739.1	641700	GRCh38	NT_029289.12	943	9084	-	100	64.07
NR_121659.1	641700	GRCh38	NT_034772.7	89338747	89339367	-	100	31.15
NR_121659.1	641700	GRCh38	NT_029289.12	943	9084	-	100	67.9
NM_002929.2	6011	CHM1_1.1	NW_004929390.1	1817923	1822255	+	99.9	52.09
NM_002929.2	6011	CHM1_1.1	NW_004929391.1	51	12015	+	99.7	48
NM_001733.4	715	CHM1_1.1	NW_004929382.1	7126493	7128392	-	100	46.8
NM_001733.4	715	CHM1_1.1	NW_004929383.1	1329	5167	-	99.9	43.46
NM_001122636.1	50614	CHM1_1.1	NW_004929386.1	9952333	9959663	-	99.93	55.2
NM_001122636.1	50614	CHM1_1.1	NW_004929387.1	10992	96950	-	99.91	44.62
NM_001129778.1	400581	CHM1_1.1	NW_004929405.1	18599910	18600429	-	99.03	53.46
NM_001129778.1	400581	CHM1_1.1	NW_004929405.1	18634292	18639610	+	99.69	34.33
NM_005434.4	7851	CHM1_1.1	NW_004929304.1	785875	793758	+	99.63	71.14
NM_005434.4	7851	CHM1_1.1	NW_004929304.1	584091	622900	-	98.2	35.98
NM_001145026.1	374462	CHM1_1.1	NW_004929384.1	42982908	43218698	+	99.81	94.21
NM_001145026.1	374462	CHM1_1.1	NW_004929384.1	42994069	43025155	-	98.39	6.93
NM_001113239.2	28996	CHM1_1.1	NW_004929332.1	77811570	77907640	-	99.7	91.41
NM_001113239.2	28996	CHM1_1.1	NW_004929333.1	11353	73225	-	100	8.46
NM_022740.4	28996	CHM1_1.1	NW_004929332.1	77811570	77907640	-	99.7	91.46
NM_022740.4	28996	CHM1_1.1	NW_004929333.1	11353	73225	-	100	8.42
NM_173471.3	115286	CHM1_1.1	NW_004929310.1	877	159093	+	99.65	86.6
NM_173471.3	115286	CHM1_1.1	NW_004929309.1	66060541	66060917	+	99.73	14.03
NM_001144064.2	100129239	CHM1_1.1	NW_004929447.1	2322597	2338899	-	97.03	53.88
NM_001144064.2	100129239	CHM1_1.1	NW_004929447.1	2334344	2334579	+	100	53.88
NM_001244892.1	100133053	CHM1_1.1	NW_004929447.1	2322597	2338899	-	97.03	53.88
NM_001244892.1	100133053	CHM1_1.1	NW_004929447.1	2334344	2334579	+	100	53.88
NM_004522.2	3800	CHM1_1.1	NW_004929305.1	3212	92690	+	99.93	90.11
NM_004522.2	3800	CHM1_1.1	NW_004929304.1	39383106	39437235	+	100	9.87
NM_001288814.1	727957	CHM1_1.1	NW_004929341.1	14228	45135	+	95.09	6.17
NM_001288814.1	727957	CHM1_1.1	NW_004929340.1	58480238	58578396	+	98.77	37.46
NM_001017915.2	3635	CHM1_1.1	NW_004929306.1	1054	63141	+	99.82	76.27
NM_001017915.2	3635	CHM1_1.1	NW_004929305.1	84133995	84204534	+	99.91	22.23
NM_005541.4	3635	CHM1_1.1	NW_004929306.1	1054	63141	+	99.82	76.31
NM_005541.4	3635	CHM1_1.1	NW_004929305.1	84133995	84204534	+	99.91	22.18
NM_014938.5	22877	CHM1_1.1	NW_004929386.1	31172	51273	+	99.91	93.72
NM_014938.5	22877	CHM1_1.1	NW_004929385.1	13093799	13094337	+	100	6.38
NM_130797.3	1804	CHM1_1.1	NW_004929334.1	58900	313516	+	99.55	78.59
NM_130797.3	1804	CHM1_1.1	NW_004929333.1	14419287	14933785	+	99.51	21.32
NM_001936.4	1804	CHM1_1.1	NW_004929334.1	58900	313516	+	99.55	83.92
NM_001936.4	1804	CHM1_1.1	NW_004929333.1	14672052	14933785	+	100	16.07
NM_001039350.2	1804	CHM1_1.1	NW_004929334.1	58900	313516	+	99.55	78.72
NM_001039350.2	1804	CHM1_1.1	NW_004929333.1	14254043	14933785	+	100	21.27
NM_001290253.1	1804	CHM1_1.1	NW_004929334.1	8723	9708	+	99.79	49
NM_001290253.1	1804	CHM1_1.1	NW_004929333.1	14419287	14933789	+	99.41	49.85
NM_001290252.1	1804	CHM1_1.1	NW_004929334.1	147536	313516	+	99.58	83.43
NM_001290252.1	1804	CHM1_1.1	NW_004929333.1	14672052	14933787	+	99.86	16.61
NM_001099289.2	344558	CHM1_1.1	NW_004929304.1	1249	10853	+	99.31	57.24
NM_001099289.2	344558	CHM1_1.1	NW_004929303.1	14419793	14781116	+	100	44.22
NM_001271893.3	117581	CHM1_1.1	NW_004929306.1	5703500	5704223	+	98.62	50.95
NM_001271893.3	117581	CHM1_1.1	NW_004929307.1	1	264	+	99.62	18.73
NM_001291815.1	256158	CHM1_1.1	NW_004929367.1	366	86761	+	99.87	74.5
NM_001291815.1	256158	CHM1_1.1	NW_004929366.1	62195050	62239032	+	99.57	14.99
NM_006060.5	10320	CHM1_1.1	NW_004929330.1	33604	62172	+	100	93.2
NM_006060.5	10320	CHM1_1.1	NW_004929329.1	50336556	50359647	+	99.08	6.83
NM_001220765.2	10320	CHM1_1.1	NW_004929330.1	33604	62172	+	100	93.06
NM_001220765.2	10320	CHM1_1.1	NW_004929329.1	50336556	50359643	+	99.76	6.91
NM_001291837.1	10320	CHM1_1.1	NW_004929330.1	33604	62172	+	100	93.47
NM_001291837.1	10320	CHM1_1.1	NW_004929329.1	50340567	50359643	+	100	6.5
NM_001291838.1	10320	CHM1_1.1	NW_004929330.1	39611	62172	+	100	93.33
NM_001291838.1	10320	CHM1_1.1	NW_004929329.1	50340567	50359648	+	99.5	6.7
NM_001291845.1	10320	CHM1_1.1	NW_004929329.1	50336556	50359646	+	99.53	22.73
NM_001291845.1	10320	CHM1_1.1	NW_004929330.1	25066	26504	+	99.72	77.07
NM_001291846.1	10320	CHM1_1.1	NW_004929329.1	50336556	50359646	+	99.53	53.47
NM_001291846.1	10320	CHM1_1.1	NW_004929330.1	25066	26899	+	100	46.89
NM_001291847.1	10320	CHM1_1.1	NW_004929329.1	50340567	50359646	+	99.75	51.86
NM_001291847.1	10320	CHM1_1.1	NW_004929330.1	25066	26899	+	100	48.52
NM_001077693.3	641700	CHM1_1.1	NW_004929323.1	47098105	47098725	-	100	43.58
NM_001077693.3	641700	CHM1_1.1	NW_004929324.1	54	5238	-	100	27.68
NM_001293739.1	641700	CHM1_1.1	NW_004929323.1	47098105	47098725	-	100	34.92
NM_001293739.1	641700	CHM1_1.1	NW_004929324.1	54	5238	-	100	31.87
NM_015201.4	23246	CHM1_1.1	NW_004929340.1	58579320	58581470	-	100	42.56
NM_015201.4	23246	CHM1_1.1	NW_004929341.1	65681	80496	-	99.78	18.91
NR_003670.1	654466	CHM1_1.1	NW_004929346.1	536022	541170	-	99.9	86.04
NR_003670.1	654466	CHM1_1.1	NW_004929346.1	531628	532303	+	97.34	14.29
NR_003287.2	100008589	CHM1_1.1	NW_004929444.1	31611799	31612286	+	99.79	9.62
NR_003287.2	100008589	CHM1_1.1	NW_004929290.1	61819125	61824525	-	97.49	7.75
NR_046235.1	100861532	CHM1_1.1	NW_004929422.1	1	2144	+	99.44	16.02
NR_046235.1	100861532	CHM1_1.1	NW_004929444.1	31611799	31612286	+	99.79	3.65
NR_046235.1	100861532	CHM1_1.1	NW_004929290.1	61819125	61824525	-	97.49	2.94
NR_047527.1	387628	CHM1_1.1	NW_004929346.1	538517	586027	-	97.72	74.83
NR_047527.1	387628	CHM1_1.1	NW_004929346.1	531727	532284	+	98.56	25.07
NR_003674.2	387628	CHM1_1.1	NW_004929346.1	538517	541170	-	97.55	73.52
NR_003674.2	387628	CHM1_1.1	NW_004929346.1	531727	532303	+	97.06	27.23
NR_121659.1	641700	CHM1_1.1	NW_004929323.1	47098105	47098725	-	100	31.15
NR_121659.1	641700	CHM1_1.1	NW_004929324.1	54	5238	-	100	28.47
NM_001187.1	574	PacBioCHM1_r2_GenBank_08312015	LJII01000475.1	131545	133572	-	98.87	61.75
NM_001187.1	574	PacBioCHM1_r2_GenBank_08312015	LJII01001373.1	26500	29578	-	97.05	47.41
NM_139320.1	89832	PacBioCHM1_r2_GenBank_08312015	LJII01000235.1	232286	248056	-	99.68	77.29
NM_139320.1	89832	PacBioCHM1_r2_GenBank_08312015	LJII01002257.1	16081	39392	+	98.66	23.51
NM_148911.1	89832	PacBioCHM1_r2_GenBank_08312015	LJII01000235.1	232286	248056	-	99.68	79.06
NM_148911.1	89832	PacBioCHM1_r2_GenBank_08312015	LJII01002257.1	16081	29394	+	99.65	20.83
NM_182484.1	85316	PacBioCHM1_r2_GenBank_08312015	LJII01000525.1	1379	27504	+	98.47	60.38
NM_182484.1	85316	PacBioCHM1_r2_GenBank_08312015	LJII01001326.1	7583	9443	+	98.47	21.35
NM_182481.1	85318	PacBioCHM1_r2_GenBank_08312015	LJII01000441.1	1991	30773	+	99.57	74.72
NM_182481.1	85318	PacBioCHM1_r2_GenBank_08312015	LJII01001888.1	28117	29496	+	100	17.13
NM_182973.1	360200	PacBioCHM1_r2_GenBank_08312015	LJII01002846.1	862	27895	-	99.94	60.22
NM_182973.1	360200	PacBioCHM1_r2_GenBank_08312015	LJII01000115.1	2998	7237	+	99.82	35.66
NM_170606.2	58508	PacBioCHM1_r2_GenBank_08312015	LJII01000098.1	9873	82376	+	99.98	76.71
NM_170606.2	58508	PacBioCHM1_r2_GenBank_08312015	LJII01001200.1	1153	59144	-	99.08	17.42
NM_170606.2	58508	PacBioCHM1_r2_GenBank_08312015	LJII01000271.1	76116	76495	-	100	2.25
NM_020761.2	57521	PacBioCHM1_r2_GenBank_08312015	LJII01000150.1	36279	296719	+	99.85	83.18
NM_020761.2	57521	PacBioCHM1_r2_GenBank_08312015	LJII01000091.1	7179835	7278029	+	99.91	16.83
NM_032558.2	84641	PacBioCHM1_r2_GenBank_08312015	LJII01000153.1	2449079	2494812	-	99.55	88.38
NM_032558.2	84641	PacBioCHM1_r2_GenBank_08312015	LJII01001555.1	7901	8277	-	100	11.38
NM_153247.2	222962	PacBioCHM1_r2_GenBank_08312015	LJII01000238.1	2053	11264	+	99.81	75.62
NM_153247.2	222962	PacBioCHM1_r2_GenBank_08312015	LJII01000108.1	5329807	5338691	+	99.85	24.25
NM_001040661.1	222962	PacBioCHM1_r2_GenBank_08312015	LJII01000238.1	2053	11264	+	99.81	75.54
NM_001040661.1	222962	PacBioCHM1_r2_GenBank_08312015	LJII01000108.1	5329807	5338691	+	99.85	24.32
NM_207328.2	150763	PacBioCHM1_r2_GenBank_08312015	LJII01000819.1	22704	33293	+	97.97	67.11
NM_207328.2	150763	PacBioCHM1_r2_GenBank_08312015	LJII01000197.1	1044988	1047359	+	97.01	33
NM_033655.3	79937	PacBioCHM1_r2_GenBank_08312015	LJII01000506.1	5127	76864	+	99.16	63.87
NM_033655.3	79937	PacBioCHM1_r2_GenBank_08312015	LJII01000236.1	5013	204652	-	98.66	49.76
NM_018491.3	55871	PacBioCHM1_r2_GenBank_08312015	LJII01001380.1	30132	73158	-	98.9	68.89
NM_018491.3	55871	PacBioCHM1_r2_GenBank_08312015	LJII01001725.1	44000	59083	+	98.83	34.42
NM_198455.2	23145	PacBioCHM1_r2_GenBank_08312015	LJII01000443.1	64	51179	+	99.82	87.81
NM_198455.2	23145	PacBioCHM1_r2_GenBank_08312015	LJII01000104.1	307	6602	-	98.76	12.42
NM_001085457.1	644019	PacBioCHM1_r2_GenBank_08312015	LJII01001380.1	30136	73158	-	99.74	68.81
NM_001085457.1	644019	PacBioCHM1_r2_GenBank_08312015	LJII01001725.1	44000	60659	+	99.84	36.88
NM_001097612.1	653519	PacBioCHM1_r2_GenBank_08312015	LJII01000291.1	1813	8948	+	100	44.96
NM_001097612.1	653519	PacBioCHM1_r2_GenBank_08312015	LJII01001338.1	397	39798	-	96.65	57.91
NM_015189.1	23233	PacBioCHM1_r2_GenBank_08312015	LJII01000021.1	85693	489492	+	99.94	69.31
NM_015189.1	23233	PacBioCHM1_r2_GenBank_08312015	LJII01000054.1	50532	174107	-	99.06	33.07
NM_014963.2	22904	PacBioCHM1_r2_GenBank_08312015	LJII01000210.1	3092	44480	+	99.75	92.16
NM_014963.2	22904	PacBioCHM1_r2_GenBank_08312015	LJII01000196.1	1204283	1234067	+	94.72	8.97
NM_020892.2	113878	PacBioCHM1_r2_GenBank_08312015	LJII01000814.1	1	28512	+	99.78	82.79
NM_020892.2	113878	PacBioCHM1_r2_GenBank_08312015	LJII01000320.1	332374	341126	+	99.78	16.47
NM_001102594.1	113878	PacBioCHM1_r2_GenBank_08312015	LJII01000814.1	1	28512	+	99.78	86.47
NM_001102594.1	113878	PacBioCHM1_r2_GenBank_08312015	LJII01000320.1	332374	346527	+	96.28	15.58
NM_002097.2	2971	PacBioCHM1_r2_GenBank_08312015	LJII01000039.1	1	8547	+	99.89	66.8
NM_002097.2	2971	PacBioCHM1_r2_GenBank_08312015	LJII01000086.1	7999810	8002458	+	99.59	35.32
NM_015202.2	23247	PacBioCHM1_r2_GenBank_08312015	LJII01000248.1	1175	31963	+	99.97	60.06
NM_015202.2	23247	PacBioCHM1_r2_GenBank_08312015	LJII01000107.1	8535	199553	-	100	39.86
NM_004061.3	1010	PacBioCHM1_r2_GenBank_08312015	LJII01000254.1	91266	204527	+	98.79	64.18
NM_004061.3	1010	PacBioCHM1_r2_GenBank_08312015	LJII01000050.1	868	879431	-	99.81	37.33
NM_152547.4	153579	PacBioCHM1_r2_GenBank_08312015	LJII01000370.1	4355	18035	+	99.52	90.34
NM_152547.4	153579	PacBioCHM1_r2_GenBank_08312015	LJII01000140.1	1591	6964	-	100	9.65
NM_007101.3	1757	PacBioCHM1_r2_GenBank_08312015	LJII01000128.1	3788360	3857662	+	99.78	82.25
NM_007101.3	1757	PacBioCHM1_r2_GenBank_08312015	LJII01000020.1	36667611	36668066	-	100	13.49
NM_001134707.1	1757	PacBioCHM1_r2_GenBank_08312015	LJII01000128.1	3789958	3857662	+	99.77	81.5
NM_001134707.1	1757	PacBioCHM1_r2_GenBank_08312015	LJII01000020.1	36667611	36668066	-	100	14.16
NM_022780.3	64795	PacBioCHM1_r2_GenBank_08312015	LJII01000564.1	79194	116304	-	100	91.62
NM_022780.3	64795	PacBioCHM1_r2_GenBank_08312015	LJII01000054.1	14048313	14048832	+	100	8.38
NM_001009944.2	5310	PacBioCHM1_r2_GenBank_08312015	LJII01000057.1	12600889	12634214	+	99.97	58.74
NM_001009944.2	5310	PacBioCHM1_r2_GenBank_08312015	LJII01000189.1	966	16912	+	99.88	41.92
NM_000296.3	5310	PacBioCHM1_r2_GenBank_08312015	LJII01000057.1	12600889	12634214	+	99.97	58.76
NM_000296.3	5310	PacBioCHM1_r2_GenBank_08312015	LJII01000189.1	966	16912	+	99.88	41.91
NM_001135865.1	100132247	PacBioCHM1_r2_GenBank_08312015	LJII01003589.1	4812	9273	-	100	78.41
NM_001135865.1	100132247	PacBioCHM1_r2_GenBank_08312015	LJII01000062.1	11604050	11624150	-	95.36	30.12
NM_152609.2	163882	PacBioCHM1_r2_GenBank_08312015	LJII01000157.1	2282559	2320328	-	99.83	81.92
NM_152609.2	163882	PacBioCHM1_r2_GenBank_08312015	LJII01000130.1	3500444	3526467	+	99.34	14.67
NM_001139459.1	163882	PacBioCHM1_r2_GenBank_08312015	LJII01000157.1	2303030	2320328	-	99.52	57.87
NM_001139459.1	163882	PacBioCHM1_r2_GenBank_08312015	LJII01000130.1	3500444	3555147	+	95.97	42.07
NM_014972.2	22980	PacBioCHM1_r2_GenBank_08312015	LJII01000215.1	220	33975	-	99.57	82.93
NM_014972.2	22980	PacBioCHM1_r2_GenBank_08312015	LJII01000392.1	227171	229334	-	99.74	17.3
NM_001144952.1	54549	PacBioCHM1_r2_GenBank_08312015	LJII01000087.1	7778002	7830200	-	99.85	59.04
NM_001144952.1	54549	PacBioCHM1_r2_GenBank_08312015	LJII01000091.1	926	260282	-	99.89	42.31
NM_001145355.1	55871	PacBioCHM1_r2_GenBank_08312015	LJII01001380.1	30132	73158	-	98.9	65.18
NM_001145355.1	55871	PacBioCHM1_r2_GenBank_08312015	LJII01001725.1	44000	59083	+	98.42	37.92
NM_001145356.1	55871	PacBioCHM1_r2_GenBank_08312015	LJII01001380.1	30132	73158	-	98.84	67.82
NM_001145356.1	55871	PacBioCHM1_r2_GenBank_08312015	LJII01001725.1	44000	59083	+	98.83	35.59
NM_001143831.2	2915	PacBioCHM1_r2_GenBank_08312015	LJII01000083.1	7941003	8286610	-	99.92	89.12
NM_001143831.2	2915	PacBioCHM1_r2_GenBank_08312015	LJII01000019.1	35650682	35863436	+	98.46	14.05
NM_172003.3	150472	PacBioCHM1_r2_GenBank_08312015	LJII01001038.1	44641	78437	-	100	58.78
NM_172003.3	150472	PacBioCHM1_r2_GenBank_08312015	LJII01001369.1	17048	61585	+	100	54.4
NM_001160116.1	123207	PacBioCHM1_r2_GenBank_08312015	LJII01000001.1	105421091	105447893	+	97.68	29.52
NM_001160116.1	123207	PacBioCHM1_r2_GenBank_08312015	LJII01000033.1	20978123	20978508	+	87.08	62.35
NM_001161357.1	23149	PacBioCHM1_r2_GenBank_08312015	LJII01000080.1	8988287	9027176	+	99.81	85.4
NM_001161357.1	23149	PacBioCHM1_r2_GenBank_08312015	LJII01000116.1	4591889	4593920	-	95.5	17.45
NM_015122.2	23149	PacBioCHM1_r2_GenBank_08312015	LJII01000080.1	8992045	9027176	+	99.85	85.79
NM_015122.2	23149	PacBioCHM1_r2_GenBank_08312015	LJII01000116.1	4591889	4593920	-	95.39	17.07
NM_001161358.1	23149	PacBioCHM1_r2_GenBank_08312015	LJII01000080.1	8988287	9027176	+	99.85	85.37
NM_001161358.1	23149	PacBioCHM1_r2_GenBank_08312015	LJII01000116.1	4591889	4593920	-	95.39	17.59
NM_001161359.1	23149	PacBioCHM1_r2_GenBank_08312015	LJII01000080.1	8992045	9027176	+	99.88	85.03
NM_001161359.1	23149	PacBioCHM1_r2_GenBank_08312015	LJII01000116.1	4591889	4593920	-	95.39	17.99
NM_001163034.1	57521	PacBioCHM1_r2_GenBank_08312015	LJII01000150.1	36279	296719	+	99.88	81.93
NM_001163034.1	57521	PacBioCHM1_r2_GenBank_08312015	LJII01000091.1	7179835	7278029	+	99.91	18.08
NM_181453.3	9648	PacBioCHM1_r2_GenBank_08312015	LJII01000246.1	4215	55334	-	99.83	71.2
NM_181453.3	9648	PacBioCHM1_r2_GenBank_08312015	LJII01000192.1	83	19676	+	99.1	39.67
NM_033225.5	64478	PacBioCHM1_r2_GenBank_08312015	LJII01000175.1	489733	1586142	-	99.88	94.34
NM_033225.5	64478	PacBioCHM1_r2_GenBank_08312015	LJII01000142.1	2159383	2734306	+	100	5.61
NM_022126.3	64077	PacBioCHM1_r2_GenBank_08312015	LJII01000124.1	3872702	3970921	-	100	57.74
NM_022126.3	64077	PacBioCHM1_r2_GenBank_08312015	LJII01000018.1	36993923	37038693	+	98.07	45.5
NM_001167880.1	64077	PacBioCHM1_r2_GenBank_08312015	LJII01000124.1	3872702	3896759	-	98.74	59.51
NM_001167880.1	64077	PacBioCHM1_r2_GenBank_08312015	LJII01000018.1	36993923	37038693	+	98.17	47.29
NM_001001671.3	389840	PacBioCHM1_r2_GenBank_08312015	LJII01000068.1	11198856	11303021	-	99.97	88.66
NM_001001671.3	389840	PacBioCHM1_r2_GenBank_08312015	LJII01000030.1	7874	36656	-	99.81	11.39
NM_006987.3	9501	PacBioCHM1_r2_GenBank_08312015	LJII01000413.1	19048	96142	+	100	74.87
NM_006987.3	9501	PacBioCHM1_r2_GenBank_08312015	LJII01000250.1	555370	589801	+	95.81	27.19
NM_001190411.1	9501	PacBioCHM1_r2_GenBank_08312015	LJII01000413.1	19048	96142	+	100	79.98
NM_001190411.1	9501	PacBioCHM1_r2_GenBank_08312015	LJII01000250.1	555370	589801	+	94.56	22.22
NM_001190412.1	9501	PacBioCHM1_r2_GenBank_08312015	LJII01000413.1	35873	96142	+	98.62	79.07
NM_001190412.1	9501	PacBioCHM1_r2_GenBank_08312015	LJII01000250.1	555370	589775	+	97.03	27.22
NM_001190413.1	9501	PacBioCHM1_r2_GenBank_08312015	LJII01000413.1	35873	96142	+	99.12	82.65
NM_001190413.1	9501	PacBioCHM1_r2_GenBank_08312015	LJII01000250.1	555370	589775	+	96.11	22.07
NM_139173.3	150159	PacBioCHM1_r2_GenBank_08312015	LJII01000090.1	7330186	7443375	+	99.85	71.15
NM_139173.3	150159	PacBioCHM1_r2_GenBank_08312015	LJII01001002.1	2904	8573	+	97.86	34.69
NM_001100874.2	150159	PacBioCHM1_r2_GenBank_08312015	LJII01000090.1	7330186	7443375	+	99.85	76.18
NM_001100874.2	150159	PacBioCHM1_r2_GenBank_08312015	LJII01000011.1	19087	19369	+	100	16.12
NM_001097613.2	653519	PacBioCHM1_r2_GenBank_08312015	LJII01000291.1	1813	8948	+	100	43.93
NM_001097613.2	653519	PacBioCHM1_r2_GenBank_08312015	LJII01001338.1	397	39798	-	96.77	58.86
NM_001198542.1	54768	PacBioCHM1_r2_GenBank_08312015	LJII01000324.1	268189	330575	-	99.3	54.25
NM_001198542.1	54768	PacBioCHM1_r2_GenBank_08312015	LJII01000063.1	11476130	11626969	+	100	58.85
NM_001198543.1	54768	PacBioCHM1_r2_GenBank_08312015	LJII01000324.1	268189	330575	-	99.3	54.77
NM_001198543.1	54768	PacBioCHM1_r2_GenBank_08312015	LJII01000063.1	11476130	11626969	+	100	58.45
NM_001199417.1	57636	PacBioCHM1_r2_GenBank_08312015	LJII01000323.1	326	72479	-	99.88	58.54
NM_001199417.1	57636	PacBioCHM1_r2_GenBank_08312015	LJII01000283.1	3182	25474	+	100	49.28
NM_001242672.1	100287898	PacBioCHM1_r2_GenBank_08312015	LJII01000171.1	1589962	1594162	-	99.9	57.4
NM_001242672.1	100287898	PacBioCHM1_r2_GenBank_08312015	LJII01000134.1	16442	56142	-	98.18	46.25
NM_022662.3	64682	PacBioCHM1_r2_GenBank_08312015	LJII01000300.1	329751	371269	-	99.82	50.32
NM_022662.3	64682	PacBioCHM1_r2_GenBank_08312015	LJII01000255.1	300	65612	-	99.91	46.04
NM_001253792.1	55311	PacBioCHM1_r2_GenBank_08312015	LJII01000155.1	1264	3662	+	99.92	66.71
NM_001253792.1	55311	PacBioCHM1_r2_GenBank_08312015	LJII01000137.1	8656	14712	-	98.99	33.62
NM_018337.3	55311	PacBioCHM1_r2_GenBank_08312015	LJII01000155.1	1264	3662	+	99.92	66.76
NM_018337.3	55311	PacBioCHM1_r2_GenBank_08312015	LJII01000137.1	8656	14712	-	98.99	33.31
NM_001092.4	29	PacBioCHM1_r2_GenBank_08312015	LJII01000636.1	56382	129979	-	99.85	83.9
NM_001092.4	29	PacBioCHM1_r2_GenBank_08312015	LJII01000242.1	620149	656655	+	100	16.07
NM_001159746.2	29	PacBioCHM1_r2_GenBank_08312015	LJII01000636.1	56382	129979	-	99.85	75.8
NM_001159746.2	29	PacBioCHM1_r2_GenBank_08312015	LJII01000242.1	541740	656655	+	99.92	24.17
NM_017558.4	54768	PacBioCHM1_r2_GenBank_08312015	LJII01000324.1	263888	330575	-	99.41	59.35
NM_017558.4	54768	PacBioCHM1_r2_GenBank_08312015	LJII01000063.1	11476130	11626969	+	100	51.72
NM_001270974.1	54768	PacBioCHM1_r2_GenBank_08312015	LJII01000324.1	47147	330575	-	99.34	84.78
NM_001270974.1	54768	PacBioCHM1_r2_GenBank_08312015	LJII01000063.1	11476130	11626969	+	100	12.21
NM_001271872.1	653464	PacBioCHM1_r2_GenBank_08312015	LJII01000470.1	46375	150633	+	99.69	79.83
NM_001271872.1	653464	PacBioCHM1_r2_GenBank_08312015	LJII01001218.1	20351	37888	+	94.9	22.94
NM_018264.3	55253	PacBioCHM1_r2_GenBank_08312015	LJII01000103.1	5469219	5614059	-	99.22	53.68
NM_018264.3	55253	PacBioCHM1_r2_GenBank_08312015	LJII01000322.1	10493	124955	-	97.69	51.6
NM_001039703.5	100132406	PacBioCHM1_r2_GenBank_08312015	LJII01000691.1	28	65435	+	95.69	78.71
NM_001039703.5	100132406	PacBioCHM1_r2_GenBank_08312015	LJII01000510.1	101797	146762	-	96.32	23.25
NM_005560.4	3911	PacBioCHM1_r2_GenBank_08312015	LJII01000226.1	428	51896	-	99.75	60.62
NM_005560.4	3911	PacBioCHM1_r2_GenBank_08312015	LJII01000191.1	572	6848	+	99.21	31.03
NM_001198832.2	9659	PacBioCHM1_r2_GenBank_08312015	LJII01001382.1	9509	73787	+	100	63.44
NM_001198832.2	9659	PacBioCHM1_r2_GenBank_08312015	LJII01001681.1	55023	63601	-	98.79	24.46
NM_001198832.2	9659	PacBioCHM1_r2_GenBank_08312015	LJII01000373.1	79485	173168	+	96.96	13.98
NM_001198834.3	9659	PacBioCHM1_r2_GenBank_08312015	LJII01001382.1	9509	73787	+	100	68.27
NM_001198834.3	9659	PacBioCHM1_r2_GenBank_08312015	LJII01001681.1	55023	63601	-	98.81	23.26
NM_001198834.3	9659	PacBioCHM1_r2_GenBank_08312015	LJII01000373.1	124091	173168	+	96.21	10.29
NM_014644.5	9659	PacBioCHM1_r2_GenBank_08312015	LJII01001382.1	9509	73787	+	100	67.82
NM_014644.5	9659	PacBioCHM1_r2_GenBank_08312015	LJII01001681.1	55023	63601	-	98.79	23.77
NM_014644.5	9659	PacBioCHM1_r2_GenBank_08312015	LJII01000373.1	124091	173168	+	96.21	10.22
NM_001002812.2	9659	PacBioCHM1_r2_GenBank_08312015	LJII01001382.1	9509	42738	+	100	80.59
NM_001002812.2	9659	PacBioCHM1_r2_GenBank_08312015	LJII01000373.1	124091	173168	+	96.21	17.71
NM_021962.4	29	PacBioCHM1_r2_GenBank_08312015	LJII01000636.1	56382	129979	-	99.85	78.82
NM_021962.4	29	PacBioCHM1_r2_GenBank_08312015	LJII01000242.1	549088	656655	+	99.91	21.14
NM_001282149.1	29	PacBioCHM1_r2_GenBank_08312015	LJII01000636.1	56382	129979	-	99.85	88.96
NM_001282149.1	29	PacBioCHM1_r2_GenBank_08312015	LJII01000242.1	650123	656655	+	100	11.02
NM_001284305.1	25771	PacBioCHM1_r2_GenBank_08312015	LJII01000125.1	3653641	3938708	-	99.38	74.93
NM_001284305.1	25771	PacBioCHM1_r2_GenBank_08312015	LJII01000037.1	25403317	25510241	+	99.17	24.93
NM_001284303.1	25771	PacBioCHM1_r2_GenBank_08312015	LJII01000125.1	3653641	3939773	-	99.15	82.23
NM_001284303.1	25771	PacBioCHM1_r2_GenBank_08312015	LJII01000037.1	25391710	25510241	+	98.93	18.41
NM_001284304.1	25771	PacBioCHM1_r2_GenBank_08312015	LJII01000125.1	3653641	3938708	-	99.38	73.79
NM_001284304.1	25771	PacBioCHM1_r2_GenBank_08312015	LJII01000037.1	25391710	25510241	+	99.22	26.08
NM_014346.3	25771	PacBioCHM1_r2_GenBank_08312015	LJII01000125.1	3653641	3938708	-	99.38	76.45
NM_014346.3	25771	PacBioCHM1_r2_GenBank_08312015	LJII01000037.1	25391710	25510241	+	99.1	23.41
NM_001286835.1	220869	PacBioCHM1_r2_GenBank_08312015	LJII01001236.1	537	33660	-	99.55	69.87
NM_001286835.1	220869	PacBioCHM1_r2_GenBank_08312015	LJII01002567.1	14944	17513	-	96.95	29.18
NM_001024916.3	220869	PacBioCHM1_r2_GenBank_08312015	LJII01001236.1	187	33660	-	98.86	48.68
NM_001024916.3	220869	PacBioCHM1_r2_GenBank_08312015	LJII01002567.1	14944	17363	-	98.89	49.93
NM_130797.3	1804	PacBioCHM1_r2_GenBank_08312015	LJII01000098.1	2673949	3146425	+	99.26	87.88
NM_130797.3	1804	PacBioCHM1_r2_GenBank_08312015	LJII01000596.1	25422	26079	+	98.33	13.59
NM_001290253.1	1804	PacBioCHM1_r2_GenBank_08312015	LJII01000098.1	2673949	2841160	+	99.02	71.02
NM_001290253.1	1804	PacBioCHM1_r2_GenBank_08312015	LJII01000596.1	25422	26079	+	98.33	31.65
NM_017848.5	54954	PacBioCHM1_r2_GenBank_08312015	LJII01000200.1	1118459	1166858	-	99.69	73.31
NM_017848.5	54954	PacBioCHM1_r2_GenBank_08312015	LJII01000119.1	7485	58060	-	99.95	26.61
NM_001201380.2	728577	PacBioCHM1_r2_GenBank_08312015	LJII01000506.1	5127	77847	+	99.58	67.72
NM_001201380.2	728577	PacBioCHM1_r2_GenBank_08312015	LJII01000236.1	5012	204832	-	98.42	43.48
NM_000947.4	5558	PacBioCHM1_r2_GenBank_08312015	LJII01000040.1	23216820	23421153	+	99.88	37.38
NM_000947.4	5558	PacBioCHM1_r2_GenBank_08312015	LJII01000307.1	90496	231001	-	97.71	65.84
NM_152286.4	375775	PacBioCHM1_r2_GenBank_08312015	LJII01000128.1	651	43142	+	99.83	62.91
NM_152286.4	375775	PacBioCHM1_r2_GenBank_08312015	LJII01000239.1	624645	670487	+	100	37.05
NM_001098537.2	375775	PacBioCHM1_r2_GenBank_08312015	LJII01000128.1	651	43142	+	99.83	61.93
NM_001098537.2	375775	PacBioCHM1_r2_GenBank_08312015	LJII01000239.1	624645	670487	+	100	38.02
NM_015102.4	261734	PacBioCHM1_r2_GenBank_08312015	LJII01000134.1	3154857	3271726	-	100	91.98
NM_015102.4	261734	PacBioCHM1_r2_GenBank_08312015	LJII01000094.1	1045	7363	-	100	8.04
NM_001291593.1	261734	PacBioCHM1_r2_GenBank_08312015	LJII01000134.1	3154857	3271726	-	100	91.46
NM_001291593.1	261734	PacBioCHM1_r2_GenBank_08312015	LJII01000094.1	1045	7363	-	100	8.57
NM_001291821.1	445571	PacBioCHM1_r2_GenBank_08312015	LJII01001380.1	30113	71559	-	99.73	68.91
NM_001291821.1	445571	PacBioCHM1_r2_GenBank_08312015	LJII01001725.1	44019	50994	+	100	31.26
NM_201453.3	445571	PacBioCHM1_r2_GenBank_08312015	LJII01001380.1	30113	73158	-	99.75	69.99
NM_201453.3	445571	PacBioCHM1_r2_GenBank_08312015	LJII01001725.1	44019	59083	+	100	33.66
NM_001145440.2	441250	PacBioCHM1_r2_GenBank_08312015	LJII01000103.1	15842	136262	+	99.87	51.69
NM_001145440.2	441250	PacBioCHM1_r2_GenBank_08312015	LJII01000322.1	10493	124940	-	99.54	48.24
NM_000842.4	2915	PacBioCHM1_r2_GenBank_08312015	LJII01000083.1	7941003	8286610	-	99.92	86.77
NM_000842.4	2915	PacBioCHM1_r2_GenBank_08312015	LJII01000019.1	35635561	35863436	+	98.7	16.36
NM_001300788.1	54954	PacBioCHM1_r2_GenBank_08312015	LJII01000200.1	1118380	1166858	-	99.67	71.93
NM_001300788.1	54954	PacBioCHM1_r2_GenBank_08312015	LJII01000119.1	7485	58083	-	99.95	27.96
NM_001300847.1	222962	PacBioCHM1_r2_GenBank_08312015	LJII01000238.1	2057	11264	+	99.81	76.59
NM_001300847.1	222962	PacBioCHM1_r2_GenBank_08312015	LJII01000108.1	5329807	5338691	+	100	23.31
NM_015326.4	23380	PacBioCHM1_r2_GenBank_08312015	LJII01000048.1	16005873	16086306	-	99.98	85.75
NM_015326.4	23380	PacBioCHM1_r2_GenBank_08312015	LJII01001218.1	22190	22842	+	96.34	9.51
NM_001170637.3	23380	PacBioCHM1_r2_GenBank_08312015	LJII01000048.1	16005873	16086306	-	99.98	85.74
NM_001170637.3	23380	PacBioCHM1_r2_GenBank_08312015	LJII01001218.1	22190	22842	+	96.34	9.51
NM_001300952.1	23380	PacBioCHM1_r2_GenBank_08312015	LJII01000048.1	16014154	16086306	-	100	80.37
NM_001300952.1	23380	PacBioCHM1_r2_GenBank_08312015	LJII01001218.1	22190	22842	+	96.34	13.11
NM_000820.3	2621	PacBioCHM1_r2_GenBank_08312015	LJII01000266.1	1	31203	-	100	35.67
NM_000820.3	2621	PacBioCHM1_r2_GenBank_08312015	LJII01000055.1	2830	5833	+	100	34.51
NM_001302371.1	100132406	PacBioCHM1_r2_GenBank_08312015	LJII01000691.1	28	65435	+	95.26	81.33
NM_001302371.1	100132406	PacBioCHM1_r2_GenBank_08312015	LJII01000510.1	125084	146762	-	96.75	21.69
NM_178568.3	146760	PacBioCHM1_r2_GenBank_08312015	LJII01000357.1	69551	72679	+	99.64	86.28
NM_178568.3	146760	PacBioCHM1_r2_GenBank_08312015	LJII01000120.1	15588	16081	-	100	13.62
NM_032512.3	57595	PacBioCHM1_r2_GenBank_08312015	LJII01000256.1	16265	22699	+	99.85	91.39
NM_032512.3	57595	PacBioCHM1_r2_GenBank_08312015	LJII01000237.1	2734	3064	-	100	8.75
NM_001303512.1	57595	PacBioCHM1_r2_GenBank_08312015	LJII01000256.1	16265	22699	+	99.85	91.43
NM_001303512.1	57595	PacBioCHM1_r2_GenBank_08312015	LJII01000237.1	2734	3064	-	100	8.71
NM_001303513.1	57595	PacBioCHM1_r2_GenBank_08312015	LJII01000256.1	16265	22699	+	99.86	91.95
NM_001303513.1	57595	PacBioCHM1_r2_GenBank_08312015	LJII01000237.1	2734	3064	-	100	8.18
NM_001303514.1	57595	PacBioCHM1_r2_GenBank_08312015	LJII01000256.1	18024	22699	+	99.87	90.46
NM_001303514.1	57595	PacBioCHM1_r2_GenBank_08312015	LJII01000237.1	2731	3064	-	99.7	9.63
NM_001308245.1	153579	PacBioCHM1_r2_GenBank_08312015	LJII01000370.1	4355	13676	+	99.68	78.96
NM_001308245.1	153579	PacBioCHM1_r2_GenBank_08312015	LJII01000140.1	1591	6964	-	100	20.65
NM_002847.4	5799	PacBioCHM1_r2_GenBank_08312015	LJII01000098.1	5799159	6401871	-	99.84	78.4
NM_002847.4	5799	PacBioCHM1_r2_GenBank_08312015	LJII01000275.1	27013	448681	+	99.52	21.54
NM_130842.3	5799	PacBioCHM1_r2_GenBank_08312015	LJII01000098.1	5799159	6401871	-	99.84	79.23
NM_130842.3	5799	PacBioCHM1_r2_GenBank_08312015	LJII01000275.1	27013	448681	+	99.49	20.71
NM_130843.3	5799	PacBioCHM1_r2_GenBank_08312015	LJII01000098.1	5799159	6401871	-	99.83	78
NM_130843.3	5799	PacBioCHM1_r2_GenBank_08312015	LJII01000275.1	27013	448681	+	99.52	21.94
NM_001308267.1	5799	PacBioCHM1_r2_GenBank_08312015	LJII01000098.1	5799159	6401871	-	99.84	80.29
NM_001308267.1	5799	PacBioCHM1_r2_GenBank_08312015	LJII01000275.1	27013	448681	+	99.46	19.66
NM_001308268.1	5799	PacBioCHM1_r2_GenBank_08312015	LJII01000098.1	5799159	6401871	-	99.84	76.72
NM_001308268.1	5799	PacBioCHM1_r2_GenBank_08312015	LJII01000275.1	73126	448681	+	99.56	23.22
NR_002217.1	441194	PacBioCHM1_r2_GenBank_08312015	LJII01000222.1	1987	8534	-	100	64.09
NR_002217.1	441194	PacBioCHM1_r2_GenBank_08312015	LJII01000749.1	107266	114281	-	98.93	37.62
NR_002894.1	84278	PacBioCHM1_r2_GenBank_08312015	LJII01001147.1	16766	43672	+	100	59.03
NR_002894.1	84278	PacBioCHM1_r2_GenBank_08312015	LJII01000020.1	8461	8782	-	100	40.14
NR_003245.1	768097	PacBioCHM1_r2_GenBank_08312015	LJII01000226.1	785904	786619	-	98.18	79.57
NR_003245.1	768097	PacBioCHM1_r2_GenBank_08312015	LJII01000369.1	1753	1963	-	99.05	23.54
NR_003610.1	283970	PacBioCHM1_r2_GenBank_08312015	LJII01000066.1	152	14545	+	99.24	56.9
NR_003610.1	283970	PacBioCHM1_r2_GenBank_08312015	LJII01000208.1	104364	159970	-	99.23	36.55
NR_003670.1	654466	PacBioCHM1_r2_GenBank_08312015	LJII01001885.1	14472	19607	+	99.82	86.04
NR_003670.1	654466	PacBioCHM1_r2_GenBank_08312015	LJII01000236.1	628901	663438	-	92.8	18.06
NR_002824.3	400322	PacBioCHM1_r2_GenBank_08312015	LJII01000112.1	30008	183688	+	96.9	85.95
NR_002824.3	400322	PacBioCHM1_r2_GenBank_08312015	LJII01000206.1	862298	865785	+	97.36	15.45
NR_024397.1	728190	PacBioCHM1_r2_GenBank_08312015	LJII01000535.1	89433	139247	-	99.72	43.91
NR_024397.1	728190	PacBioCHM1_r2_GenBank_08312015	LJII01000046.1	14373337	14373656	-	97.18	38.42
NR_024420.1	389634	PacBioCHM1_r2_GenBank_08312015	LJII01000213.1	885038	885521	+	96.69	70.82
NR_024420.1	389634	PacBioCHM1_r2_GenBank_08312015	LJII01002803.1	22201	22379	+	100	27.03
NR_003611.2	399761	PacBioCHM1_r2_GenBank_08312015	LJII01001931.1	932	3924	+	99.79	70.67
NR_003611.2	399761	PacBioCHM1_r2_GenBank_08312015	LJII01000709.1	143	9387	-	99.09	23.35
NR_026752.1	84809	PacBioCHM1_r2_GenBank_08312015	LJII01003055.1	28298	30082	-	99.8	59.2
NR_026752.1	84809	PacBioCHM1_r2_GenBank_08312015	LJII01003408.1	200	5343	-	99.58	40.96
NR_028063.1	9648	PacBioCHM1_r2_GenBank_08312015	LJII01000246.1	4215	55334	-	99.83	70.85
NR_028063.1	9648	PacBioCHM1_r2_GenBank_08312015	LJII01000192.1	83	19676	+	99.1	40.16
NR_027020.2	554226	PacBioCHM1_r2_GenBank_08312015	LJII01000422.1	134284	173309	+	97.69	72.7
NR_027020.2	554226	PacBioCHM1_r2_GenBank_08312015	LJII01001755.1	22709	23150	+	99.09	30.61
NR_028393.1	100303453	PacBioCHM1_r2_GenBank_08312015	LJII01000138.1	4124	266358	-	97.53	35.13
NR_028393.1	100303453	PacBioCHM1_r2_GenBank_08312015	LJII01000143.1	17894	240891	+	99.96	67.96
NR_028394.1	100303453	PacBioCHM1_r2_GenBank_08312015	LJII01000138.1	23869	266358	-	100	69.8
NR_028394.1	100303453	PacBioCHM1_r2_GenBank_08312015	LJII01000143.1	17892	18809	+	99.89	25.8
NR_028395.1	100303453	PacBioCHM1_r2_GenBank_08312015	LJII01000138.1	23869	266358	-	100	71.88
NR_028395.1	100303453	PacBioCHM1_r2_GenBank_08312015	LJII01000143.1	17894	18809	+	99.89	26.51
NR_028397.1	100303453	PacBioCHM1_r2_GenBank_08312015	LJII01000138.1	23869	266358	-	100	67.39
NR_028397.1	100303453	PacBioCHM1_r2_GenBank_08312015	LJII01000143.1	17892	18809	+	99.89	27.86
NR_028396.1	100303453	PacBioCHM1_r2_GenBank_08312015	LJII01000138.1	23869	266358	-	100	68.67
NR_028396.1	100303453	PacBioCHM1_r2_GenBank_08312015	LJII01000143.1	17892	18809	+	99.89	26.77
NR_028398.1	100303453	PacBioCHM1_r2_GenBank_08312015	LJII01000138.1	23869	266358	-	100	64.76
NR_028398.1	100303453	PacBioCHM1_r2_GenBank_08312015	LJII01000143.1	17892	18809	+	99.89	30.11
NR_029411.1	100133091	PacBioCHM1_r2_GenBank_08312015	LJII01001034.1	15661	52061	-	99.14	78.1
NR_029411.1	100133091	PacBioCHM1_r2_GenBank_08312015	LJII01000814.1	59668	86861	+	99.39	24.33
NR_029426.1	11039	PacBioCHM1_r2_GenBank_08312015	LJII01003124.1	6763	10348	+	100	50.23
NR_029426.1	11039	PacBioCHM1_r2_GenBank_08312015	LJII01000730.1	15703	61510	+	97.61	36.54
NR_027028.2	728411	PacBioCHM1_r2_GenBank_08312015	LJII01001270.1	17577	23454	+	99.77	63.86
NR_027028.2	728411	PacBioCHM1_r2_GenBank_08312015	LJII01000059.1	9222654	9225056	-	96.13	36.41
NR_033856.1	644316	PacBioCHM1_r2_GenBank_08312015	LJII01000403.1	165036	198738	-	99.29	78.5
NR_033856.1	644316	PacBioCHM1_r2_GenBank_08312015	LJII01002621.1	5194	5505	-	99.67	12.37
NR_036541.1	653519	PacBioCHM1_r2_GenBank_08312015	LJII01000291.1	1813	8948	+	100	44.51
NR_036541.1	653519	PacBioCHM1_r2_GenBank_08312015	LJII01001338.1	397	39798	-	96.7	58.33
NR_027145.2	100271835	PacBioCHM1_r2_GenBank_08312015	LJII01000326.1	255473	290966	+	99.83	58.06
NR_027145.2	100271835	PacBioCHM1_r2_GenBank_08312015	LJII01000192.1	164987	196552	+	97.91	46.13
NR_024054.2	11039	PacBioCHM1_r2_GenBank_08312015	LJII01000730.1	13150	19048	+	98.66	44.19
NR_024054.2	11039	PacBioCHM1_r2_GenBank_08312015	LJII01003124.1	6765	21736	+	99.07	42.12
NR_047513.1	150159	PacBioCHM1_r2_GenBank_08312015	LJII01000090.1	7330186	7443375	+	99.83	74.3
NR_047513.1	150159	PacBioCHM1_r2_GenBank_08312015	LJII01000011.1	4001	19369	+	93.05	24.4
NR_047527.1	387628	PacBioCHM1_r2_GenBank_08312015	LJII01001405.1	35419	38062	-	100	69.97
NR_047527.1	387628	PacBioCHM1_r2_GenBank_08312015	LJII01002914.1	21924	35408	+	98.29	31.5
NR_003674.2	387628	PacBioCHM1_r2_GenBank_08312015	LJII01001405.1	35419	38062	-	100	73.61
NR_003674.2	387628	PacBioCHM1_r2_GenBank_08312015	LJII01002914.1	21924	24987	+	97.18	28.22
NR_024495.2	642826	PacBioCHM1_r2_GenBank_08312015	LJII01002239.1	47885	51473	-	99.63	76.22
NR_024495.2	642826	PacBioCHM1_r2_GenBank_08312015	LJII01000129.1	3039718	3076886	-	91.25	33.03
NR_047662.2	729732	PacBioCHM1_r2_GenBank_08312015	LJII01000904.1	9557	11545	-	100	49.94
NR_047662.2	729732	PacBioCHM1_r2_GenBank_08312015	LJII01000006.1	70875434	70881904	+	98.84	25.76
NR_047662.2	729732	PacBioCHM1_r2_GenBank_08312015	LJII01002481.1	18469	44537	+	98.94	18.96
NR_003580.2	100093631	PacBioCHM1_r2_GenBank_08312015	LJII01000182.1	1472213	1504115	+	99.87	88.44
NR_003580.2	100093631	PacBioCHM1_r2_GenBank_08312015	LJII01001145.1	68004	68421	+	99.28	11.46
NR_103773.1	100288866	PacBioCHM1_r2_GenBank_08312015	LJII01000141.1	4151	9606	+	100	79.93
NR_103773.1	100288866	PacBioCHM1_r2_GenBank_08312015	LJII01000049.1	16002662	16002919	+	98.06	21.13
NR_002206.3	2970	PacBioCHM1_r2_GenBank_08312015	LJII01000182.1	1472213	1504115	+	99.84	88.61
NR_002206.3	2970	PacBioCHM1_r2_GenBank_08312015	LJII01001145.1	68009	68421	+	100	11.38
NR_104189.1	100873165	PacBioCHM1_r2_GenBank_08312015	LJII01000470.1	121582	124316	-	99.77	86.9
NR_104189.1	100873165	PacBioCHM1_r2_GenBank_08312015	LJII01000358.1	229098	253616	+	96.29	17.01
NR_104292.1	25771	PacBioCHM1_r2_GenBank_08312015	LJII01000125.1	3653641	3939900	-	97.74	75.65
NR_104292.1	25771	PacBioCHM1_r2_GenBank_08312015	LJII01000037.1	25392832	25510241	+	99.25	31.39
NR_109817.1	441123	PacBioCHM1_r2_GenBank_08312015	LJII01000031.1	26544878	26545850	+	100	73.75
NR_109817.1	441123	PacBioCHM1_r2_GenBank_08312015	LJII01002126.1	2710	2825	+	100	26.24
NR_109983.1	729218	PacBioCHM1_r2_GenBank_08312015	LJII01002136.1	17534	46953	-	99.81	93.12
NR_109983.1	729218	PacBioCHM1_r2_GenBank_08312015	LJII01000130.1	5603	11085	-	100	6.9
NR_110220.1	101927289	PacBioCHM1_r2_GenBank_08312015	LJII01000164.1	103537	124819	-	99.08	37.84
NR_110220.1	101927289	PacBioCHM1_r2_GenBank_08312015	LJII01000165.1	1873775	1874040	-	96.61	46.18
NR_038328.2	100132288	PacBioCHM1_r2_GenBank_08312015	LJII01000374.1	239063	241155	-	99.62	80.23
NR_038328.2	100132288	PacBioCHM1_r2_GenBank_08312015	LJII01000778.1	37090	39354	-	100	20.38
NR_111893.1	643827	PacBioCHM1_r2_GenBank_08312015	LJII01000506.1	5127	76864	+	99.22	65.62
NR_111893.1	643827	PacBioCHM1_r2_GenBank_08312015	LJII01000236.1	5012	204500	-	99.02	48.43
NR_111957.1	103091866	PacBioCHM1_r2_GenBank_08312015	LJII01002037.1	15947	18729	-	99.35	65.77
NR_111957.1	103091866	PacBioCHM1_r2_GenBank_08312015	LJII01000685.1	99364	100758	+	99.79	34.51
NR_111958.1	103091866	PacBioCHM1_r2_GenBank_08312015	LJII01002037.1	15947	18728	-	99.57	68.35
NR_111958.1	103091866	PacBioCHM1_r2_GenBank_08312015	LJII01000685.1	99364	99797	+	100	31.93
NR_111950.1	57234	PacBioCHM1_r2_GenBank_08312015	LJII01001596.1	38140	61891	-	99.22	83.11
NR_111950.1	57234	PacBioCHM1_r2_GenBank_08312015	LJII01000368.1	13030	21849	+	94.41	10.76
NR_111954.1	103091866	PacBioCHM1_r2_GenBank_08312015	LJII01002037.1	15947	18728	-	99.6	70.3
NR_111954.1	103091866	PacBioCHM1_r2_GenBank_08312015	LJII01000685.1	99364	99797	+	100	29.97
NR_111956.1	103091866	PacBioCHM1_r2_GenBank_08312015	LJII01002037.1	15947	36276	-	98.29	67.85
NR_111956.1	103091866	PacBioCHM1_r2_GenBank_08312015	LJII01000685.1	99364	99796	+	100	35.96
NR_111955.1	103091866	PacBioCHM1_r2_GenBank_08312015	LJII01002037.1	15947	36276	-	98.33	64.39
NR_111955.1	103091866	PacBioCHM1_r2_GenBank_08312015	LJII01000685.1	99364	99797	+	100	38.92
NR_111987.1	261734	PacBioCHM1_r2_GenBank_08312015	LJII01000134.1	3154857	3271726	-	99.98	92.77
NR_111987.1	261734	PacBioCHM1_r2_GenBank_08312015	LJII01000094.1	1045	7363	-	100	7.25
NR_120372.1	101926895	PacBioCHM1_r2_GenBank_08312015	LJII01000106.1	5400247	5421528	-	100	55.5
NR_120372.1	101926895	PacBioCHM1_r2_GenBank_08312015	LJII01000069.1	11192425	11196401	+	99.66	45.1
NR_120611.1	101060691	PacBioCHM1_r2_GenBank_08312015	LJII01000535.1	135490	139249	-	98.45	84.28
NR_120611.1	101060691	PacBioCHM1_r2_GenBank_08312015	LJII01000046.1	14338832	14373733	-	94.08	11.64
NR_120612.1	101060691	PacBioCHM1_r2_GenBank_08312015	LJII01000026.1	29461322	29477105	+	97.61	55.91
NR_120612.1	101060691	PacBioCHM1_r2_GenBank_08312015	LJII01000046.1	14373337	14373733	-	98.99	43.48
NR_120613.1	101060691	PacBioCHM1_r2_GenBank_08312015	LJII01000026.1	64937	65493	+	98.56	42.42
NR_120613.1	101060691	PacBioCHM1_r2_GenBank_08312015	LJII01000046.1	14373337	14373733	-	98.99	29.82
NR_046203.2	643648	PacBioCHM1_r2_GenBank_08312015	LJII01000865.1	46351	48276	-	99.84	54.4
NR_046203.2	643648	PacBioCHM1_r2_GenBank_08312015	LJII01002522.1	24064	28093	-	100	44.73
NR_123721.1	353511	PacBioCHM1_r2_GenBank_08312015	LJII01000208.1	1785	30097	+	99.49	64.22
NR_123721.1	353511	PacBioCHM1_r2_GenBank_08312015	LJII01000057.1	12618623	12634214	+	98.12	37.8
NR_123740.1	57494	PacBioCHM1_r2_GenBank_08312015	LJII01000016.1	31329747	31330063	+	84.68	19.59
NR_123740.1	57494	PacBioCHM1_r2_GenBank_08312015	LJII01000028.1	22118158	22119194	+	96.06	64.29
NR_038378.4	441242	PacBioCHM1_r2_GenBank_08312015	LJII01000642.1	48740	77174	-	99.4	76.86
NR_038378.4	441242	PacBioCHM1_r2_GenBank_08312015	LJII01000193.1	1307177	1321296	+	96.76	24.92
NR_132337.1	642776	PacBioCHM1_r2_GenBank_08312015	LJII01000156.1	2376088	2376272	-	99.45	55.05
NR_132337.1	642776	PacBioCHM1_r2_GenBank_08312015	LJII01000122.1	82471	82623	-	100	45.53
NM_001187.1	574	CA P6 CHM1 Conservative 2.5%	LKHW01002045.1	15888	17915	+	99.19	61.75
NM_001187.1	574	CA P6 CHM1 Conservative 2.5%	LKHW01000666.1	5811	8873	-	94.74	47.41
NM_014246.1	9620	CA P6 CHM1 Conservative 2.5%	LKHW01001825.1	5939	109565	+	99.94	68.97
NM_014246.1	9620	CA P6 CHM1 Conservative 2.5%	LKHW01003846.1	88317	106478	+	99.85	31.22
NM_017416.1	26280	CA P6 CHM1 Conservative 2.5%	LKHW01000914.1	1535535	2236877	+	100	48.67
NM_017416.1	26280	CA P6 CHM1 Conservative 2.5%	LKHW01001102.1	39117	322874	-	99.8	51.52
NM_018034.2	55100	CA P6 CHM1 Conservative 2.5%	LKHW01002963.1	8178285	8233313	-	100	45.8
NM_018034.2	55100	CA P6 CHM1 Conservative 2.5%	LKHW01002964.1	62557	317745	-	98.34	56.43
NM_177998.1	133060	CA P6 CHM1 Conservative 2.5%	LKHW01004286.1	160	9461	+	99.81	59.39
NM_177998.1	133060	CA P6 CHM1 Conservative 2.5%	LKHW01000541.1	3222408	3222843	+	99.31	23.22
NM_182484.1	85316	CA P6 CHM1 Conservative 2.5%	LKHW01001648.1	27210	38038	+	99.33	24.45
NM_182484.1	85316	CA P6 CHM1 Conservative 2.5%	LKHW01000467.1	16022	17880	-	97.96	21.35
NM_181704.1	85317	CA P6 CHM1 Conservative 2.5%	LKHW01001648.1	27209	38038	+	99.77	24.51
NM_181704.1	85317	CA P6 CHM1 Conservative 2.5%	LKHW01003167.1	8425	14579	+	99.66	16.14
NM_181704.1	85317	CA P6 CHM1 Conservative 2.5%	LKHW01000665.1	5057	6897	-	98.47	21.25
NM_182481.1	85318	CA P6 CHM1 Conservative 2.5%	LKHW01004031.1	41499	70272	-	99.43	74.72
NM_182481.1	85318	CA P6 CHM1 Conservative 2.5%	LKHW01002044.1	11470	45216	+	97.88	25.01
NM_182973.1	360200	CA P6 CHM1 Conservative 2.5%	LKHW01003615.1	1	4228	+	100	35.28
NM_182973.1	360200	CA P6 CHM1 Conservative 2.5%	LKHW01003519.1	336578	357206	+	99.82	36.35
NM_005481.2	10025	CA P6 CHM1 Conservative 2.5%	LKHW01003741.1	154127	178275	+	100	76.25
NM_005481.2	10025	CA P6 CHM1 Conservative 2.5%	LKHW01003533.1	349321	349616	-	99.32	10.12
NM_013310.3	29798	CA P6 CHM1 Conservative 2.5%	LKHW01000847.1	64837	65623	+	99.36	64.47
NM_013310.3	29798	CA P6 CHM1 Conservative 2.5%	LKHW01003827.1	121333	150408	+	99.77	35.59
NM_021098.2	8912	CA P6 CHM1 Conservative 2.5%	LKHW01000536.1	4033	31131	+	99.84	93.28
NM_021098.2	8912	CA P6 CHM1 Conservative 2.5%	LKHW01002340.1	89769	90566	+	100	6.78
NM_001005407.1	8912	CA P6 CHM1 Conservative 2.5%	LKHW01000536.1	4033	31131	+	99.84	93.27
NM_001005407.1	8912	CA P6 CHM1 Conservative 2.5%	LKHW01002340.1	89769	90566	+	100	6.79
NM_004434.2	2009	CA P6 CHM1 Conservative 2.5%	LKHW01000728.1	4365009	4371042	-	99.95	55.74
NM_004434.2	2009	CA P6 CHM1 Conservative 2.5%	LKHW01001255.1	1559	129087	-	99.49	44.54
NM_001008707.1	2009	CA P6 CHM1 Conservative 2.5%	LKHW01000728.1	4365009	4371042	-	99.95	55.04
NM_001008707.1	2009	CA P6 CHM1 Conservative 2.5%	LKHW01001255.1	1559	129087	-	99.51	45.23
NM_003307.3	7226	CA P6 CHM1 Conservative 2.5%	LKHW01002335.1	1085091	1138888	+	99.9	52.24
NM_003307.3	7226	CA P6 CHM1 Conservative 2.5%	LKHW01002492.1	327	1716	+	99.92	23.65
NM_003307.3	7226	CA P6 CHM1 Conservative 2.5%	LKHW01004364.1	4451	30835	+	99.42	20.72
NM_021965.3	5239	CA P6 CHM1 Conservative 2.5%	LKHW01002732.1	1069	153859	+	99.71	85.14
NM_021965.3	5239	CA P6 CHM1 Conservative 2.5%	LKHW01004824.1	942	21972	-	98.62	19.42
NM_003271.4	7106	CA P6 CHM1 Conservative 2.5%	LKHW01003243.1	6880	11450	+	99.82	80.8
NM_003271.4	7106	CA P6 CHM1 Conservative 2.5%	LKHW01003238.1	441708	449289	+	99.63	19.24
NM_001025234.1	7106	CA P6 CHM1 Conservative 2.5%	LKHW01003243.1	5030	11450	+	99.31	81.76
NM_001025234.1	7106	CA P6 CHM1 Conservative 2.5%	LKHW01003238.1	443003	449289	+	99.65	20.02
NM_001025235.1	7106	CA P6 CHM1 Conservative 2.5%	LKHW01003243.1	6880	11450	+	99.82	80.07
NM_001025235.1	7106	CA P6 CHM1 Conservative 2.5%	LKHW01003238.1	441825	449289	+	99.65	19.97
NM_001025236.1	7106	CA P6 CHM1 Conservative 2.5%	LKHW01003243.1	6880	11450	+	99.82	79.79
NM_001025236.1	7106	CA P6 CHM1 Conservative 2.5%	LKHW01003238.1	441825	449289	+	99.65	20.24
NM_001025237.1	7106	CA P6 CHM1 Conservative 2.5%	LKHW01003243.1	6880	11450	+	99.82	78.04
NM_001025237.1	7106	CA P6 CHM1 Conservative 2.5%	LKHW01003238.1	443368	449289	+	99.69	21.97
NM_015113.3	23140	CA P6 CHM1 Conservative 2.5%	LKHW01003691.1	13455	133051	+	99.84	96.29
NM_015113.3	23140	CA P6 CHM1 Conservative 2.5%	LKHW01003241.1	3012	3430	-	99.76	3.67
NM_170606.2	58508	CA P6 CHM1 Conservative 2.5%	LKHW01001419.1	12898	85401	+	99.98	76.71
NM_170606.2	58508	CA P6 CHM1 Conservative 2.5%	LKHW01000219.1	1704140	1918147	+	99.89	22.01
NM_001003795.2	389524	CA P6 CHM1 Conservative 2.5%	LKHW01004722.1	1517186	1543817	-	99.66	83.96
NM_001003795.2	389524	CA P6 CHM1 Conservative 2.5%	LKHW01004745.1	17265	48011	+	99.21	21
NM_020761.2	57521	CA P6 CHM1 Conservative 2.5%	LKHW01000720.1	26234	286673	-	99.85	83.18
NM_020761.2	57521	CA P6 CHM1 Conservative 2.5%	LKHW01001133.1	33261	131461	-	99.91	16.83
NM_013427.2	395	CA P6 CHM1 Conservative 2.5%	LKHW01001708.1	307460	424696	+	99.86	71.49
NM_013427.2	395	CA P6 CHM1 Conservative 2.5%	LKHW01001095.1	3691341	3692802	+	99.93	28.56
NM_006125.2	395	CA P6 CHM1 Conservative 2.5%	LKHW01001708.1	307460	418840	+	100	59.82
NM_006125.2	395	CA P6 CHM1 Conservative 2.5%	LKHW01001095.1	3691341	3692802	+	99.93	40.25
NM_005539.3	3632	CA P6 CHM1 Conservative 2.5%	LKHW01004585.1	912452	918269	-	100	58.47
NM_005539.3	3632	CA P6 CHM1 Conservative 2.5%	LKHW01002937.1	23497	237443	-	100	39.17
NM_004278.3	9487	CA P6 CHM1 Conservative 2.5%	LKHW01000539.1	380201	479737	+	100	48.06
NM_004278.3	9487	CA P6 CHM1 Conservative 2.5%	LKHW01001979.1	4175	4638	+	99.56	40.27
NM_030582.3	80781	CA P6 CHM1 Conservative 2.5%	LKHW01002171.1	6405	16127	+	99.96	44.99
NM_030582.3	80781	CA P6 CHM1 Conservative 2.5%	LKHW01003974.1	845	23021	-	99.93	26.51
NM_001702.2	575	CA P6 CHM1 Conservative 2.5%	LKHW01003048.1	2472	50389	-	99.53	54.63
NM_001702.2	575	CA P6 CHM1 Conservative 2.5%	LKHW01003602.1	230775	257844	-	99.92	45.74
NM_006034.3	9537	CA P6 CHM1 Conservative 2.5%	LKHW01003668.1	3210969	3216253	-	99.29	84.62
NM_006034.3	9537	CA P6 CHM1 Conservative 2.5%	LKHW01002770.1	714576	714951	+	98.68	10.68
NM_001089.2	21	CA P6 CHM1 Conservative 2.5%	LKHW01001698.1	231099	274532	+	99.96	44.94
NM_001089.2	21	CA P6 CHM1 Conservative 2.5%	LKHW01002342.1	1775	18144	+	100	52.84
NM_001080556.1	146845	CA P6 CHM1 Conservative 2.5%	LKHW01000348.1	9552	45409	-	100	44.43
NM_001080556.1	146845	CA P6 CHM1 Conservative 2.5%	LKHW01000351.1	1532703	1543283	-	99.68	48.21
NM_145054.4	146845	CA P6 CHM1 Conservative 2.5%	LKHW01000348.1	9552	45409	-	100	49.56
NM_145054.4	146845	CA P6 CHM1 Conservative 2.5%	LKHW01000351.1	1532703	1543283	-	99.68	43.73
NM_019054.2	54537	CA P6 CHM1 Conservative 2.5%	LKHW01002411.1	14470	50317	+	99.57	68.07
NM_019054.2	54537	CA P6 CHM1 Conservative 2.5%	LKHW01000354.1	2478	13839	+	99.32	38.95
NM_014853.2	9905	CA P6 CHM1 Conservative 2.5%	LKHW01003568.1	349604	365776	-	99.75	76.16
NM_014853.2	9905	CA P6 CHM1 Conservative 2.5%	LKHW01003550.1	13364	20453	-	99.1	6.8
NM_001098509.1	9905	CA P6 CHM1 Conservative 2.5%	LKHW01003568.1	349604	365776	-	99.74	75.51
NM_001098509.1	9905	CA P6 CHM1 Conservative 2.5%	LKHW01003550.1	13364	20451	-	99.09	6.91
NM_019112.3	10347	CA P6 CHM1 Conservative 2.5%	LKHW01003581.1	212326	227321	-	99.85	59.18
NM_019112.3	10347	CA P6 CHM1 Conservative 2.5%	LKHW01003741.1	196	7736	-	99.88	36.59
NM_007037.4	11095	CA P6 CHM1 Conservative 2.5%	LKHW01004316.1	38923	52975	+	99.56	50.25
NM_007037.4	11095	CA P6 CHM1 Conservative 2.5%	LKHW01000199.1	3030687	3031895	-	99.83	33
NM_182482.2	85319	CA P6 CHM1 Conservative 2.5%	LKHW01002144.1	20619	58093	+	99.55	83.02
NM_182482.2	85319	CA P6 CHM1 Conservative 2.5%	LKHW01000092.1	5657	31086	-	94.67	21.25
NM_173464.3	91133	CA P6 CHM1 Conservative 2.5%	LKHW01000778.1	5950823	6134331	-	100	63.84
NM_173464.3	91133	CA P6 CHM1 Conservative 2.5%	LKHW01000779.1	11789	278833	-	99.11	37.65
NM_000827.3	2890	CA P6 CHM1 Conservative 2.5%	LKHW01000350.1	6365955	6415360	-	100	61.86
NM_000827.3	2890	CA P6 CHM1 Conservative 2.5%	LKHW01004240.1	434091	659912	+	99.24	39.29
NM_001114183.1	2890	CA P6 CHM1 Conservative 2.5%	LKHW01000350.1	6365955	6415360	-	100	61.86
NM_001114183.1	2890	CA P6 CHM1 Conservative 2.5%	LKHW01004240.1	434091	659912	+	99.12	39.65
NM_014009.3	50943	CA P6 CHM1 Conservative 2.5%	LKHW01004087.1	97445	98773	-	99.82	48.23
NM_014009.3	50943	CA P6 CHM1 Conservative 2.5%	LKHW01000144.1	29	9122	-	99.67	38.79
NM_001114377.1	50943	CA P6 CHM1 Conservative 2.5%	LKHW01004087.1	97445	98773	-	99.82	50.46
NM_001114377.1	50943	CA P6 CHM1 Conservative 2.5%	LKHW01000144.1	29	9122	-	99.63	35.99
NM_000292.2	5256	CA P6 CHM1 Conservative 2.5%	LKHW01003572.1	143221	226917	+	99.97	65.48
NM_000292.2	5256	CA P6 CHM1 Conservative 2.5%	LKHW01003240.1	636	3534	+	99.69	30.38
NM_001122636.1	50614	CA P6 CHM1 Conservative 2.5%	LKHW01002932.1	35143	42473	+	99.93	55.2
NM_001122636.1	50614	CA P6 CHM1 Conservative 2.5%	LKHW01004339.1	13001	17985	+	100	20.18
NM_001122636.1	50614	CA P6 CHM1 Conservative 2.5%	LKHW01004090.1	49716	90795	+	99.81	20.07
NM_020777.2	57537	CA P6 CHM1 Conservative 2.5%	LKHW01001978.1	1219525	1460584	-	99.64	92
NM_020777.2	57537	CA P6 CHM1 Conservative 2.5%	LKHW01000541.1	46003	249383	-	99.64	9.17
NM_001129778.1	400581	CA P6 CHM1 Conservative 2.5%	LKHW01000127.1	56203	56719	-	100	53.46
NM_001129778.1	400581	CA P6 CHM1 Conservative 2.5%	LKHW01000126.1	10611	21727	-	100	46.53
NM_030629.2	80790	CA P6 CHM1 Conservative 2.5%	LKHW01000917.1	1254	21635	+	99.93	70.1
NM_030629.2	80790	CA P6 CHM1 Conservative 2.5%	LKHW01000024.1	10383755	10566921	+	100	29.9
NM_198390.2	80790	CA P6 CHM1 Conservative 2.5%	LKHW01000917.1	1254	21635	+	99.93	66.46
NM_198390.2	80790	CA P6 CHM1 Conservative 2.5%	LKHW01000024.1	10333578	10566921	+	100	33.53
NM_178314.3	353116	CA P6 CHM1 Conservative 2.5%	LKHW01000009.1	75839465	75867696	-	99.94	73.55
NM_178314.3	353116	CA P6 CHM1 Conservative 2.5%	LKHW01000208.1	8119481	8132990	+	98.63	27.78
NM_004061.3	1010	CA P6 CHM1 Conservative 2.5%	LKHW01000488.1	234642	347907	-	98.79	64.18
NM_004061.3	1010	CA P6 CHM1 Conservative 2.5%	LKHW01004231.1	6587638	7466215	+	99.81	37.33
NM_007101.3	1757	CA P6 CHM1 Conservative 2.5%	LKHW01000921.1	3631201	3700503	+	99.78	82.25
NM_007101.3	1757	CA P6 CHM1 Conservative 2.5%	LKHW01003476.1	20608237	20608692	-	100	13.49
NM_001134707.1	1757	CA P6 CHM1 Conservative 2.5%	LKHW01000921.1	3632799	3700503	+	99.77	81.5
NM_001134707.1	1757	CA P6 CHM1 Conservative 2.5%	LKHW01003476.1	20608237	20608692	-	100	14.16
NM_022780.3	64795	CA P6 CHM1 Conservative 2.5%	LKHW01003858.1	77516	114629	-	99.98	91.62
NM_022780.3	64795	CA P6 CHM1 Conservative 2.5%	LKHW01002965.1	12294425	12315202	+	99.69	10.64
NM_130444.2	80781	CA P6 CHM1 Conservative 2.5%	LKHW01002171.1	6405	16127	+	99.96	40.18
NM_130444.2	80781	CA P6 CHM1 Conservative 2.5%	LKHW01003974.1	845	23021	-	99.95	34.34
NM_005647.3	6907	CA P6 CHM1 Conservative 2.5%	LKHW01001708.1	1842382	1921813	-	99.85	93.73
NM_005647.3	6907	CA P6 CHM1 Conservative 2.5%	LKHW01003874.1	125113	161764	+	100	6.26
NM_001139498.1	2258	CA P6 CHM1 Conservative 2.5%	LKHW01003530.1	135024	135988	-	100	14.54
NM_001139498.1	2258	CA P6 CHM1 Conservative 2.5%	LKHW01002163.1	944532	1021886	-	100	85.26
NM_001139500.1	2258	CA P6 CHM1 Conservative 2.5%	LKHW01003530.1	135022	135988	-	99.68	13.58
NM_001139500.1	2258	CA P6 CHM1 Conservative 2.5%	LKHW01002163.1	944532	1170630	-	100	86.33
NM_001139501.1	2258	CA P6 CHM1 Conservative 2.5%	LKHW01003530.1	135023	135988	-	100	12.93
NM_001139501.1	2258	CA P6 CHM1 Conservative 2.5%	LKHW01002163.1	944532	1185240	-	98.95	86.87
NM_003156.3	6786	CA P6 CHM1 Conservative 2.5%	LKHW01003862.1	22638	91991	+	99.93	79.29
NM_003156.3	6786	CA P6 CHM1 Conservative 2.5%	LKHW01002487.1	59157	171092	-	100	20.63
NM_001145029.1	374860	CA P6 CHM1 Conservative 2.5%	LKHW01004789.1	235	92321	-	98.75	63.8
NM_001145029.1	374860	CA P6 CHM1 Conservative 2.5%	LKHW01004788.1	16307	40742	-	99.8	44.46
NM_001105521.2	282973	CA P6 CHM1 Conservative 2.5%	LKHW01000345.1	7622448	7684454	+	99.91	38.28
NM_001105521.2	282973	CA P6 CHM1 Conservative 2.5%	LKHW01002937.1	598519	607110	-	99.4	38.54
NM_001146685.1	643965	CA P6 CHM1 Conservative 2.5%	LKHW01004030.1	136105	136363	+	99.61	52.64
NM_001146685.1	643965	CA P6 CHM1 Conservative 2.5%	LKHW01003232.1	514487	514721	-	100	47.76
NM_004187.3	8242	CA P6 CHM1 Conservative 2.5%	LKHW01004161.1	130	29706	+	99.95	90.06
NM_004187.3	8242	CA P6 CHM1 Conservative 2.5%	LKHW01003237.1	521376	521761	+	99.74	5.62
NM_001146702.1	8242	CA P6 CHM1 Conservative 2.5%	LKHW01004161.1	3079	29706	+	99.96	88.81
NM_001146702.1	8242	CA P6 CHM1 Conservative 2.5%	LKHW01003237.1	521376	521761	+	99.74	6.33
NM_033103.4	85415	CA P6 CHM1 Conservative 2.5%	LKHW01001404.1	1603	19210	+	99.86	63.46
NM_033103.4	85415	CA P6 CHM1 Conservative 2.5%	LKHW01000460.1	32504	61114	+	95.24	30.68
NM_001160116.1	123207	CA P6 CHM1 Conservative 2.5%	LKHW01000027.1	894150	920953	-	97.68	29.52
NM_001160116.1	123207	CA P6 CHM1 Conservative 2.5%	LKHW01001683.1	20949804	20950189	+	87.08	62.35
NM_000109.3	1756	CA P6 CHM1 Conservative 2.5%	LKHW01000911.1	3761	1431488	+	99.84	82.52
NM_000109.3	1756	CA P6 CHM1 Conservative 2.5%	LKHW01000210.1	9848	773830	-	100	15.16
NM_004006.2	1756	CA P6 CHM1 Conservative 2.5%	LKHW01000911.1	3761	1431488	+	99.84	82.97
NM_004006.2	1756	CA P6 CHM1 Conservative 2.5%	LKHW01000210.1	9848	645781	-	100	14.7
NM_004009.3	1756	CA P6 CHM1 Conservative 2.5%	LKHW01000911.1	3761	1431488	+	99.84	82.92
NM_004009.3	1756	CA P6 CHM1 Conservative 2.5%	LKHW01000210.1	9848	562775	-	100	14.75
NM_004010.3	1756	CA P6 CHM1 Conservative 2.5%	LKHW01000911.1	3761	1431488	+	99.84	82.43
NM_004010.3	1756	CA P6 CHM1 Conservative 2.5%	LKHW01000210.1	9848	562774	-	100	15.25
NM_001161334.1	440689	CA P6 CHM1 Conservative 2.5%	LKHW01001422.1	53897	54468	-	99.47	57.25
NM_001161334.1	440689	CA P6 CHM1 Conservative 2.5%	LKHW01000190.1	14227	14660	-	98.16	43.44
NM_001163034.1	57521	CA P6 CHM1 Conservative 2.5%	LKHW01000720.1	26234	286673	-	99.88	81.93
NM_001163034.1	57521	CA P6 CHM1 Conservative 2.5%	LKHW01001133.1	33261	131461	-	99.91	18.08
NM_025074.6	80144	CA P6 CHM1 Conservative 2.5%	LKHW01003392.1	49523884	49825013	-	99.9	96.58
NM_025074.6	80144	CA P6 CHM1 Conservative 2.5%	LKHW01003466.1	9526077	9547765	+	99.82	3.62
NM_001164266.1	4054	CA P6 CHM1 Conservative 2.5%	LKHW01000031.1	2133390	2149195	-	99.94	86.57
NM_001164266.1	4054	CA P6 CHM1 Conservative 2.5%	LKHW01001586.1	2175498	2176100	+	99.5	13.17
NM_021070.4	4054	CA P6 CHM1 Conservative 2.5%	LKHW01000031.1	2133390	2149195	-	99.94	86.49
NM_021070.4	4054	CA P6 CHM1 Conservative 2.5%	LKHW01001586.1	2175498	2176106	+	99.34	13.29
NM_001130144.2	4054	CA P6 CHM1 Conservative 2.5%	LKHW01000031.1	2133390	2149195	-	99.95	86.89
NM_001130144.2	4054	CA P6 CHM1 Conservative 2.5%	LKHW01001586.1	2175498	2176106	+	99.34	12.89
NM_001164315.1	375248	CA P6 CHM1 Conservative 2.5%	LKHW01001018.1	27607	157763	+	95.9	73.88
NM_001164315.1	375248	CA P6 CHM1 Conservative 2.5%	LKHW01000803.1	37823	63224	-	93.23	32.33
NM_001005291.2	6720	CA P6 CHM1 Conservative 2.5%	LKHW01004535.1	10	2379	+	99.43	35.29
NM_001005291.2	6720	CA P6 CHM1 Conservative 2.5%	LKHW01002474.1	576649	595399	+	100	29.26
NM_004176.4	6720	CA P6 CHM1 Conservative 2.5%	LKHW01004535.1	10	2379	+	99.43	35.93
NM_004176.4	6720	CA P6 CHM1 Conservative 2.5%	LKHW01002474.1	576649	595399	+	100	27.97
NM_001166133.1	80144	CA P6 CHM1 Conservative 2.5%	LKHW01003392.1	49621576	49825013	-	99.85	92.6
NM_001166133.1	80144	CA P6 CHM1 Conservative 2.5%	LKHW01003466.1	9526077	9547765	+	99.82	7.82
NM_022126.3	64077	CA P6 CHM1 Conservative 2.5%	LKHW01000345.1	6356	104580	+	100	57.74
NM_022126.3	64077	CA P6 CHM1 Conservative 2.5%	LKHW01001418.1	2327392	2372142	+	98.07	45.5
NM_001167880.1	64077	CA P6 CHM1 Conservative 2.5%	LKHW01000345.1	80519	104580	+	98.74	59.51
NM_001167880.1	64077	CA P6 CHM1 Conservative 2.5%	LKHW01001418.1	2327392	2372142	+	98.17	47.29
NM_001001671.3	389840	CA P6 CHM1 Conservative 2.5%	LKHW01003545.1	230443	330373	-	100	84.5
NM_001001671.3	389840	CA P6 CHM1 Conservative 2.5%	LKHW01001096.1	3647873	3676658	+	99.81	11.39
NM_199454.2	63976	CA P6 CHM1 Conservative 2.5%	LKHW01004232.1	25747	79200	+	99.84	93.99
NM_199454.2	63976	CA P6 CHM1 Conservative 2.5%	LKHW01003566.1	58920	260434	-	97.15	6.83
NM_022114.3	63976	CA P6 CHM1 Conservative 2.5%	LKHW01004232.1	25747	79200	+	99.84	94.03
NM_022114.3	63976	CA P6 CHM1 Conservative 2.5%	LKHW01003566.1	58920	260434	-	97.15	6.78
NM_020972.2	57732	CA P6 CHM1 Conservative 2.5%	LKHW01001965.1	10070	108259	-	100	27.22
NM_020972.2	57732	CA P6 CHM1 Conservative 2.5%	LKHW01002944.1	492649	497271	-	100	42.41
NM_001172656.1	57732	CA P6 CHM1 Conservative 2.5%	LKHW01001965.1	10070	108259	-	100	25.6
NM_001172656.1	57732	CA P6 CHM1 Conservative 2.5%	LKHW01002944.1	492649	514994	-	98.7	46.14
NM_001172659.1	57732	CA P6 CHM1 Conservative 2.5%	LKHW01001965.1	10070	54672	-	99.82	27.8
NM_001172659.1	57732	CA P6 CHM1 Conservative 2.5%	LKHW01002944.1	492649	497271	-	100	42.07
NM_016937.3	5422	CA P6 CHM1 Conservative 2.5%	LKHW01003560.1	20627	239748	+	99.23	48.25
NM_016937.3	5422	CA P6 CHM1 Conservative 2.5%	LKHW01004471.1	640457	695501	+	100	54.28
NM_001142503.2	9754	CA P6 CHM1 Conservative 2.5%	LKHW01000227.1	2970093	2995577	-	99.85	94.68
NM_001142503.2	9754	CA P6 CHM1 Conservative 2.5%	LKHW01002172.1	13730	40903	-	94.66	7.45
NM_014725.4	9754	CA P6 CHM1 Conservative 2.5%	LKHW01000227.1	2970093	2995577	-	99.84	94.59
NM_014725.4	9754	CA P6 CHM1 Conservative 2.5%	LKHW01002172.1	23053	40903	-	100	6
NM_002458.2	727897	CA P6 CHM1 Conservative 2.5%	LKHW01003243.1	377257	400078	+	99.83	50.62
NM_002458.2	727897	CA P6 CHM1 Conservative 2.5%	LKHW01001592.1	2116042	2124004	-	100	14.73
NM_022359.5	9659	CA P6 CHM1 Conservative 2.5%	LKHW01004708.1	23910	28816	-	98.58	49.91
NM_022359.5	9659	CA P6 CHM1 Conservative 2.5%	LKHW01002665.1	39009	120229	-	99.65	51.19
NM_001195261.1	9659	CA P6 CHM1 Conservative 2.5%	LKHW01004708.1	23910	27448	-	99.39	77.72
NM_001195261.1	9659	CA P6 CHM1 Conservative 2.5%	LKHW01002665.1	39009	39500	-	100	22.18
NM_001002810.3	9659	CA P6 CHM1 Conservative 2.5%	LKHW01004708.1	23910	27448	-	99.39	65.07
NM_001002810.3	9659	CA P6 CHM1 Conservative 2.5%	LKHW01002665.1	39009	39451	-	99.77	34.66
NM_001040260.3	166614	CA P6 CHM1 Conservative 2.5%	LKHW01004239.1	6140465	6312252	+	100	66.14
NM_001040260.3	166614	CA P6 CHM1 Conservative 2.5%	LKHW01003225.1	6126	7572	+	99.17	33.92
NM_001040261.4	166614	CA P6 CHM1 Conservative 2.5%	LKHW01004239.1	6140465	6312252	+	100	66.68
NM_001040261.4	166614	CA P6 CHM1 Conservative 2.5%	LKHW01003225.1	6126	7572	+	99.17	33.52
NM_001198542.1	54768	CA P6 CHM1 Conservative 2.5%	LKHW01000408.1	5300	103562	+	99.64	63.26
NM_001198542.1	54768	CA P6 CHM1 Conservative 2.5%	LKHW01000024.1	1628	102663	-	99.61	41.49
NM_001198543.1	54768	CA P6 CHM1 Conservative 2.5%	LKHW01000408.1	5300	103562	+	99.64	63.86
NM_001198543.1	54768	CA P6 CHM1 Conservative 2.5%	LKHW01000024.1	1628	102663	-	99.61	40.93
NM_001200001.1	4853	CA P6 CHM1 Conservative 2.5%	LKHW01002670.1	16735	87224	+	99.97	89.58
NM_001200001.1	4853	CA P6 CHM1 Conservative 2.5%	LKHW01004700.1	19884	20268	-	98.19	8.89
NM_024408.3	4853	CA P6 CHM1 Conservative 2.5%	LKHW01002670.1	16735	110784	+	99.99	96.08
NM_024408.3	4853	CA P6 CHM1 Conservative 2.5%	LKHW01004700.1	19884	20268	-	98.19	3.35
NM_004469.4	2277	CA P6 CHM1 Conservative 2.5%	LKHW01001095.1	593	13199	+	100	63.06
NM_004469.4	2277	CA P6 CHM1 Conservative 2.5%	LKHW01001591.1	1325	22637	-	99.87	36.99
NM_016434.3	51750	CA P6 CHM1 Conservative 2.5%	LKHW01003536.1	1254	33952	-	99.85	68.08
NM_016434.3	51750	CA P6 CHM1 Conservative 2.5%	LKHW01003557.1	1188	3072	+	99.73	22.98
NM_032957.4	51750	CA P6 CHM1 Conservative 2.5%	LKHW01003536.1	1254	33952	-	99.85	68.54
NM_032957.4	51750	CA P6 CHM1 Conservative 2.5%	LKHW01003557.1	1188	3072	+	99.73	22.65
NM_002627.4	5214	CA P6 CHM1 Conservative 2.5%	LKHW01003208.1	10534	48218	+	99.75	90.62
NM_002627.4	5214	CA P6 CHM1 Conservative 2.5%	LKHW01001109.1	385	15329	-	99.62	9.97
NM_001242339.1	5214	CA P6 CHM1 Conservative 2.5%	LKHW01003208.1	10534	48218	+	99.75	89.46
NM_001242339.1	5214	CA P6 CHM1 Conservative 2.5%	LKHW01001109.1	384	14222	-	99.35	11.14
NM_001242672.1	100287898	CA P6 CHM1 Conservative 2.5%	LKHW01003738.1	5729	9929	+	99.9	57.4
NM_001242672.1	100287898	CA P6 CHM1 Conservative 2.5%	LKHW01004336.1	21669	27726	+	100	42.92
NM_001130413.3	6339	CA P6 CHM1 Conservative 2.5%	LKHW01004030.1	1	1565	+	99.62	34.7
NM_001130413.3	6339	CA P6 CHM1 Conservative 2.5%	LKHW01004415.1	31	1973	-	95.19	20.63
NM_001003828.2	29780	CA P6 CHM1 Conservative 2.5%	LKHW01003041.1	494822	544953	-	100	73.39
NM_001003828.2	29780	CA P6 CHM1 Conservative 2.5%	LKHW01000355.1	5909448	5909910	+	99.7	18.03
NM_005173.3	489	CA P6 CHM1 Conservative 2.5%	LKHW01003691.1	173034	208842	+	100	66.53
NM_005173.3	489	CA P6 CHM1 Conservative 2.5%	LKHW01003650.1	812	2384	+	99.87	33.28
NM_174953.2	489	CA P6 CHM1 Conservative 2.5%	LKHW01003691.1	173034	209524	+	100	67.61
NM_174953.2	489	CA P6 CHM1 Conservative 2.5%	LKHW01003650.1	812	2384	+	99.87	32.2
NM_174954.2	489	CA P6 CHM1 Conservative 2.5%	LKHW01003691.1	173034	209524	+	100	67.53
NM_174954.2	489	CA P6 CHM1 Conservative 2.5%	LKHW01003650.1	812	2384	+	99.87	32.28
NM_174955.2	489	CA P6 CHM1 Conservative 2.5%	LKHW01003691.1	173034	209265	+	100	67.14
NM_174955.2	489	CA P6 CHM1 Conservative 2.5%	LKHW01003650.1	809	2384	+	99.8	32.73
NM_174956.2	489	CA P6 CHM1 Conservative 2.5%	LKHW01003691.1	173034	209278	+	100	67.23
NM_174956.2	489	CA P6 CHM1 Conservative 2.5%	LKHW01003650.1	812	2384	+	99.87	32.58
NM_174957.2	489	CA P6 CHM1 Conservative 2.5%	LKHW01003691.1	173034	208842	+	100	66.57
NM_174957.2	489	CA P6 CHM1 Conservative 2.5%	LKHW01003650.1	813	2384	+	99.8	33.28
NM_174958.2	489	CA P6 CHM1 Conservative 2.5%	LKHW01003691.1	173034	209278	+	100	76.63
NM_174958.2	489	CA P6 CHM1 Conservative 2.5%	LKHW01003650.1	812	2384	+	99.89	23.15
NM_018271.4	55258	CA P6 CHM1 Conservative 2.5%	LKHW01004486.1	973764	977707	-	99.91	59.01
NM_018271.4	55258	CA P6 CHM1 Conservative 2.5%	LKHW01004647.1	210303	216181	+	99.75	41.1
NM_001244676.1	55258	CA P6 CHM1 Conservative 2.5%	LKHW01004486.1	973764	977707	-	99.91	55.01
NM_001244676.1	55258	CA P6 CHM1 Conservative 2.5%	LKHW01004647.1	207474	216181	+	98.98	45.08
NM_001244678.1	55258	CA P6 CHM1 Conservative 2.5%	LKHW01004486.1	973764	977707	-	99.9	65.15
NM_001244678.1	55258	CA P6 CHM1 Conservative 2.5%	LKHW01004647.1	207474	216181	+	98.36	35.01
NM_001092.4	29	CA P6 CHM1 Conservative 2.5%	LKHW01004133.1	826	56910	+	99.84	78.25
NM_001092.4	29	CA P6 CHM1 Conservative 2.5%	LKHW01004142.1	11114	53435	-	99.9	21.75
NM_001159746.2	29	CA P6 CHM1 Conservative 2.5%	LKHW01004133.1	826	56910	+	99.84	70.69
NM_001159746.2	29	CA P6 CHM1 Conservative 2.5%	LKHW01004142.1	11114	69886	-	99.91	19.98
NM_001159746.2	29	CA P6 CHM1 Conservative 2.5%	LKHW01002634.1	21472	37091	-	98.07	10.17
NM_001258019.1	2890	CA P6 CHM1 Conservative 2.5%	LKHW01000350.1	6365955	6415360	-	100	64.57
NM_001258019.1	2890	CA P6 CHM1 Conservative 2.5%	LKHW01004240.1	434091	659912	+	99.15	36.64
NM_001258020.1	2890	CA P6 CHM1 Conservative 2.5%	LKHW01000350.1	6365955	6415360	-	100	61.25
NM_001258020.1	2890	CA P6 CHM1 Conservative 2.5%	LKHW01004240.1	434091	659912	+	99.14	40.24
NM_001258021.1	2890	CA P6 CHM1 Conservative 2.5%	LKHW01000350.1	6365955	6415360	-	100	65.38
NM_001258021.1	2890	CA P6 CHM1 Conservative 2.5%	LKHW01004240.1	435739	659912	+	99.12	35.85
NM_001258022.1	2890	CA P6 CHM1 Conservative 2.5%	LKHW01000350.1	6365955	6415360	-	100	65.38
NM_001258022.1	2890	CA P6 CHM1 Conservative 2.5%	LKHW01004240.1	435739	659912	+	98.98	36.23
NM_001258023.1	2890	CA P6 CHM1 Conservative 2.5%	LKHW01000350.1	6365955	6415360	-	100	66.64
NM_001258023.1	2890	CA P6 CHM1 Conservative 2.5%	LKHW01004240.1	434864	659912	+	99.08	34.61
NM_001258205.1	162514	CA P6 CHM1 Conservative 2.5%	LKHW01002159.1	1951	21667	+	99.72	77.32
NM_001258205.1	162514	CA P6 CHM1 Conservative 2.5%	LKHW01003744.1	132013	151892	+	99.37	13.04
NM_145068.3	162514	CA P6 CHM1 Conservative 2.5%	LKHW01002159.1	1951	21667	+	99.72	77.31
NM_145068.3	162514	CA P6 CHM1 Conservative 2.5%	LKHW01003744.1	132013	151892	+	99.37	13.05
NM_001258321.1	9537	CA P6 CHM1 Conservative 2.5%	LKHW01003668.1	3210969	3217009	-	99.33	85.25
NM_001258321.1	9537	CA P6 CHM1 Conservative 2.5%	LKHW01002770.1	714327	714757	+	100	11.7
NM_001258322.1	9537	CA P6 CHM1 Conservative 2.5%	LKHW01003668.1	3210969	3217008	-	99.33	86.88
NM_001258322.1	9537	CA P6 CHM1 Conservative 2.5%	LKHW01002770.1	714327	714756	+	100	11.9
NM_001258323.1	9537	CA P6 CHM1 Conservative 2.5%	LKHW01003668.1	3210969	3216253	-	99.29	82.85
NM_001258323.1	9537	CA P6 CHM1 Conservative 2.5%	LKHW01002770.1	714576	714952	+	98.69	10.49
NM_001258324.1	9537	CA P6 CHM1 Conservative 2.5%	LKHW01003668.1	3210969	3217011	-	99.3	88.05
NM_001258324.1	9537	CA P6 CHM1 Conservative 2.5%	LKHW01002770.1	714327	714756	+	100	12.05
NM_017558.4	54768	CA P6 CHM1 Conservative 2.5%	LKHW01000408.1	5300	107863	+	99.83	67.07
NM_017558.4	54768	CA P6 CHM1 Conservative 2.5%	LKHW01000024.1	1628	102663	-	99.63	37
NM_001270974.1	54768	CA P6 CHM1 Conservative 2.5%	LKHW01000408.1	5300	114805	+	99.82	14.54
NM_001270974.1	54768	CA P6 CHM1 Conservative 2.5%	LKHW01000412.1	2438	129627	+	99.18	51.39
NM_001270974.1	54768	CA P6 CHM1 Conservative 2.5%	LKHW01000024.1	1628	102663	-	99.63	8.73
NM_001270974.1	54768	CA P6 CHM1 Conservative 2.5%	LKHW01000410.1	2252	56409	+	99.71	22.08
NM_001271872.1	653464	CA P6 CHM1 Conservative 2.5%	LKHW01000365.1	4922	109178	-	99.69	79.86
NM_001271872.1	653464	CA P6 CHM1 Conservative 2.5%	LKHW01003266.1	44198	70356	-	98.1	22.01
NM_020713.2	57473	CA P6 CHM1 Conservative 2.5%	LKHW01003557.1	266232	272638	-	99.97	66.04
NM_020713.2	57473	CA P6 CHM1 Conservative 2.5%	LKHW01004186.1	1	5665	-	100	23.64
NM_001039703.5	100132406	CA P6 CHM1 Conservative 2.5%	LKHW01001269.1	583	39949	+	98.12	58.03
NM_001039703.5	100132406	CA P6 CHM1 Conservative 2.5%	LKHW01000505.1	2922	29414	+	96.96	28.41
NM_001277961.1	6786	CA P6 CHM1 Conservative 2.5%	LKHW01003862.1	22638	91991	+	99.94	80.8
NM_001277961.1	6786	CA P6 CHM1 Conservative 2.5%	LKHW01002487.1	59157	171092	-	100	19.13
NM_001277962.1	6786	CA P6 CHM1 Conservative 2.5%	LKHW01003862.1	22638	91991	+	99.93	79.48
NM_001277962.1	6786	CA P6 CHM1 Conservative 2.5%	LKHW01002487.1	59157	171092	-	100	20.44
NM_001007237.2	3321	CA P6 CHM1 Conservative 2.5%	LKHW01004243.1	4373024	4434089	-	99.6	90.35
NM_001007237.2	3321	CA P6 CHM1 Conservative 2.5%	LKHW01002670.1	3358599	3360090	+	99.03	11.32
NM_001542.3	3321	CA P6 CHM1 Conservative 2.5%	LKHW01004243.1	4373024	4415090	-	99.92	90.68
NM_001542.3	3321	CA P6 CHM1 Conservative 2.5%	LKHW01002670.1	3359398	3360090	+	98.84	9.53
NM_001278267.1	100288142	CA P6 CHM1 Conservative 2.5%	LKHW01000426.1	495	39216	+	96.86	35.46
NM_001278267.1	100288142	CA P6 CHM1 Conservative 2.5%	LKHW01001269.1	583	39949	+	97.52	34.13
NM_001278267.1	100288142	CA P6 CHM1 Conservative 2.5%	LKHW01004528.1	510	26773	-	96.27	19.78
NM_015383.2	25832	CA P6 CHM1 Conservative 2.5%	LKHW01000425.1	553	41838	+	98.53	76.84
NM_015383.2	25832	CA P6 CHM1 Conservative 2.5%	LKHW01004732.1	30390	53375	+	96.83	18.03
NM_173638.4	284565	CA P6 CHM1 Conservative 2.5%	LKHW01004694.1	15044	44460	-	100	93.7
NM_173638.4	284565	CA P6 CHM1 Conservative 2.5%	LKHW01000160.1	4059	4326	-	98.52	6.27
NM_001170755.2	284565	CA P6 CHM1 Conservative 2.5%	LKHW01004694.1	15044	44463	-	100	92.39
NM_001170755.2	284565	CA P6 CHM1 Conservative 2.5%	LKHW01000160.1	4059	6967	-	98.91	7.64
NM_005560.4	3911	CA P6 CHM1 Conservative 2.5%	LKHW01004455.1	4786	25036	+	99.6	37.35
NM_005560.4	3911	CA P6 CHM1 Conservative 2.5%	LKHW01003859.1	24929672	24934488	-	100	25.04
NM_005560.4	3911	CA P6 CHM1 Conservative 2.5%	LKHW01003997.1	80013	86064	+	98.21	3.4
NM_001198832.2	9659	CA P6 CHM1 Conservative 2.5%	LKHW01002662.1	31054	92391	-	99.53	79.11
NM_001198832.2	9659	CA P6 CHM1 Conservative 2.5%	LKHW01004708.1	24349	28816	-	97.56	4.97
NM_001198832.2	9659	CA P6 CHM1 Conservative 2.5%	LKHW01002665.1	6962	84089	-	98.13	9.81
NM_001198834.3	9659	CA P6 CHM1 Conservative 2.5%	LKHW01002662.1	31054	92391	-	99.5	82.94
NM_001198834.3	9659	CA P6 CHM1 Conservative 2.5%	LKHW01004708.1	24349	27448	-	99.21	4.57
NM_001198834.3	9659	CA P6 CHM1 Conservative 2.5%	LKHW01002665.1	16508	39451	-	95.91	6.32
NM_014644.5	9659	CA P6 CHM1 Conservative 2.5%	LKHW01002662.1	31054	92391	-	99.51	83.06
NM_014644.5	9659	CA P6 CHM1 Conservative 2.5%	LKHW01004708.1	24349	27448	-	99.21	4.54
NM_014644.5	9659	CA P6 CHM1 Conservative 2.5%	LKHW01002665.1	16508	39451	-	95.91	6.28
NM_001002812.2	9659	CA P6 CHM1 Conservative 2.5%	LKHW01002662.1	70501	92391	-	99.5	70.71
NM_001002812.2	9659	CA P6 CHM1 Conservative 2.5%	LKHW01004708.1	5462	27448	-	97.64	8.71
NM_001002812.2	9659	CA P6 CHM1 Conservative 2.5%	LKHW01002665.1	30410	39451	-	98.17	10.17
NM_203458.4	388677	CA P6 CHM1 Conservative 2.5%	LKHW01000623.1	7360	41781	-	98.78	93.5
NM_203458.4	388677	CA P6 CHM1 Conservative 2.5%	LKHW01004700.1	1383	20223	-	94.17	7.34
NM_173537.3	84163	CA P6 CHM1 Conservative 2.5%	LKHW01004722.1	1517186	1543817	-	99.6	83.97
NM_173537.3	84163	CA P6 CHM1 Conservative 2.5%	LKHW01004745.1	17265	48011	+	98.81	20.97
NM_021962.4	29	CA P6 CHM1 Conservative 2.5%	LKHW01004133.1	826	56910	+	99.84	73.52
NM_021962.4	29	CA P6 CHM1 Conservative 2.5%	LKHW01004142.1	11114	69886	-	99.91	20.77
NM_021962.4	29	CA P6 CHM1 Conservative 2.5%	LKHW01002634.1	29436	29743	-	99.67	5.7
NM_001282149.1	29	CA P6 CHM1 Conservative 2.5%	LKHW01004133.1	826	56910	+	99.84	82.97
NM_001282149.1	29	CA P6 CHM1 Conservative 2.5%	LKHW01004142.1	11114	23460	-	99.87	17.04
NM_001282622.1	8242	CA P6 CHM1 Conservative 2.5%	LKHW01004161.1	130	29706	+	99.95	90.05
NM_001282622.1	8242	CA P6 CHM1 Conservative 2.5%	LKHW01003237.1	521376	521761	+	99.74	5.62
NM_015381.6	25817	CA P6 CHM1 Conservative 2.5%	LKHW01002157.1	1219633	1326071	-	99.74	90.38
NM_015381.6	25817	CA P6 CHM1 Conservative 2.5%	LKHW01001970.1	1694611	1694880	+	99.62	10.22
NM_001283009.1	51750	CA P6 CHM1 Conservative 2.5%	LKHW01003536.1	1254	33952	-	99.85	65.83
NM_001283009.1	51750	CA P6 CHM1 Conservative 2.5%	LKHW01003557.1	1188	3072	+	99.77	25.54
NM_001283010.1	51750	CA P6 CHM1 Conservative 2.5%	LKHW01003536.1	1254	33952	-	99.87	66.19
NM_001283010.1	51750	CA P6 CHM1 Conservative 2.5%	LKHW01003557.1	1188	3072	+	99.73	24.35
NM_001284305.1	25771	CA P6 CHM1 Conservative 2.5%	LKHW01001970.1	7322	292390	+	99.38	74.93
NM_001284305.1	25771	CA P6 CHM1 Conservative 2.5%	LKHW01003582.1	1670	108588	-	99.17	24.93
NM_001284303.1	25771	CA P6 CHM1 Conservative 2.5%	LKHW01001970.1	6257	292390	+	99.15	82.23
NM_001284303.1	25771	CA P6 CHM1 Conservative 2.5%	LKHW01003582.1	1670	120288	-	98.93	18.41
NM_001284304.1	25771	CA P6 CHM1 Conservative 2.5%	LKHW01001970.1	7322	292390	+	99.38	73.79
NM_001284304.1	25771	CA P6 CHM1 Conservative 2.5%	LKHW01003582.1	1670	120288	-	99.22	26.08
NM_014346.3	25771	CA P6 CHM1 Conservative 2.5%	LKHW01001970.1	7322	292390	+	99.38	76.45
NM_014346.3	25771	CA P6 CHM1 Conservative 2.5%	LKHW01003582.1	1670	120288	-	99.1	23.41
NM_017820.4	54932	CA P6 CHM1 Conservative 2.5%	LKHW01003720.1	7296	65040	-	99.76	29.49
NM_017820.4	54932	CA P6 CHM1 Conservative 2.5%	LKHW01000921.1	7683	48065	+	98.94	22.99
NM_003954.4	9020	CA P6 CHM1 Conservative 2.5%	LKHW01000352.1	2481	49146	-	99.62	46.89
NM_003954.4	9020	CA P6 CHM1 Conservative 2.5%	LKHW01002475.1	1	1079	+	100	24.05
NM_130797.3	1804	CA P6 CHM1 Conservative 2.5%	LKHW01000218.1	3263981	3736456	-	99.26	87.88
NM_130797.3	1804	CA P6 CHM1 Conservative 2.5%	LKHW01000219.1	88624	89281	-	98.33	13.59
NM_001039350.2	1804	CA P6 CHM1 Conservative 2.5%	LKHW01000218.1	3263981	3710379	-	99.59	86.73
NM_001039350.2	1804	CA P6 CHM1 Conservative 2.5%	LKHW01000219.1	253660	254298	-	100	13.3
NM_001290253.1	1804	CA P6 CHM1 Conservative 2.5%	LKHW01000218.1	3569245	3736456	-	99.02	71.02
NM_001290253.1	1804	CA P6 CHM1 Conservative 2.5%	LKHW01000219.1	88624	89281	-	98.33	31.65
NM_017848.5	54954	CA P6 CHM1 Conservative 2.5%	LKHW01003411.1	320257	364389	-	99.26	71.11
NM_017848.5	54954	CA P6 CHM1 Conservative 2.5%	LKHW01004241.1	247428	298004	+	99.95	26.61
NM_003386.2	7455	CA P6 CHM1 Conservative 2.5%	LKHW01004252.1	33278	76246	+	99.9	74.57
NM_003386.2	7455	CA P6 CHM1 Conservative 2.5%	LKHW01003954.1	172746	185921	-	99.94	21.7
NM_173059.2	7455	CA P6 CHM1 Conservative 2.5%	LKHW01004252.1	33278	76246	+	99.9	76.99
NM_173059.2	7455	CA P6 CHM1 Conservative 2.5%	LKHW01003954.1	172746	185921	-	99.93	19.16
NM_001039464.3	374977	CA P6 CHM1 Conservative 2.5%	LKHW01001250.1	2398	63408	-	99.74	89.27
NM_001039464.3	374977	CA P6 CHM1 Conservative 2.5%	LKHW01003393.1	2117	3368	+	100	8.81
NM_001291332.1	374977	CA P6 CHM1 Conservative 2.5%	LKHW01001250.1	2398	63408	-	99.68	84.54
NM_001291332.1	374977	CA P6 CHM1 Conservative 2.5%	LKHW01003393.1	2117	3368	+	100	12.69
NM_001276343.2	119016	CA P6 CHM1 Conservative 2.5%	LKHW01000317.1	728	19260	+	99.56	83.1
NM_001276343.2	119016	CA P6 CHM1 Conservative 2.5%	LKHW01000290.1	26144	31940	+	99.42	20.83
NM_001291379.1	119016	CA P6 CHM1 Conservative 2.5%	LKHW01000317.1	719	19260	+	99.61	76.35
NM_001291379.1	119016	CA P6 CHM1 Conservative 2.5%	LKHW01000290.1	19735	29292	+	98.46	26.4
NM_133446.3	119016	CA P6 CHM1 Conservative 2.5%	LKHW01000317.1	719	19260	+	99.42	85.82
NM_133446.3	119016	CA P6 CHM1 Conservative 2.5%	LKHW01000290.1	26144	31940	+	99.34	18.6
NM_152286.4	375775	CA P6 CHM1 Conservative 2.5%	LKHW01003720.1	101294	140302	-	99.85	56.91
NM_152286.4	375775	CA P6 CHM1 Conservative 2.5%	LKHW01002484.1	701897	737974	+	100	31.86
NM_001098537.2	375775	CA P6 CHM1 Conservative 2.5%	LKHW01003720.1	101294	140302	-	99.85	56.03
NM_001098537.2	375775	CA P6 CHM1 Conservative 2.5%	LKHW01002484.1	701897	737974	+	100	32.91
NM_018452.5	729515	CA P6 CHM1 Conservative 2.5%	LKHW01003487.1	22109	26082	+	99.72	78.42
NM_018452.5	729515	CA P6 CHM1 Conservative 2.5%	LKHW01000027.1	10235538	10241031	+	99.18	21.63
NM_001145440.2	441250	CA P6 CHM1 Conservative 2.5%	LKHW01003857.1	4379944	4519348	-	99.83	57.17
NM_001145440.2	441250	CA P6 CHM1 Conservative 2.5%	LKHW01004049.1	10578	61272	-	100	35.41
NM_206862.3	10579	CA P6 CHM1 Conservative 2.5%	LKHW01001418.1	13831	135714	+	99.94	38.83
NM_206862.3	10579	CA P6 CHM1 Conservative 2.5%	LKHW01000537.1	4853301	4952756	+	99.83	61.09
NM_001291876.1	10579	CA P6 CHM1 Conservative 2.5%	LKHW01001418.1	13831	135714	+	99.94	36.43
NM_001291876.1	10579	CA P6 CHM1 Conservative 2.5%	LKHW01000537.1	4853301	4952121	+	99.84	62.22
NM_001291877.1	10579	CA P6 CHM1 Conservative 2.5%	LKHW01001418.1	13830	135714	+	99.94	35.87
NM_001291877.1	10579	CA P6 CHM1 Conservative 2.5%	LKHW01000537.1	4853301	4952899	+	99.85	64.01
NM_206861.2	10579	CA P6 CHM1 Conservative 2.5%	LKHW01001418.1	13829	135714	+	99.94	87.85
NM_206861.2	10579	CA P6 CHM1 Conservative 2.5%	LKHW01000537.1	4853301	4940826	+	92.9	14.99
NM_001134407.2	2903	CA P6 CHM1 Conservative 2.5%	LKHW01000545.1	16327	201295	+	99.91	93.46
NM_001134407.2	2903	CA P6 CHM1 Conservative 2.5%	LKHW01000201.1	4554787	4557223	+	100	6.55
NM_000833.4	2903	CA P6 CHM1 Conservative 2.5%	LKHW01000545.1	16327	201295	+	99.91	95
NM_000833.4	2903	CA P6 CHM1 Conservative 2.5%	LKHW01000201.1	4554440	4557223	+	100	5.01
NM_001134408.2	2903	CA P6 CHM1 Conservative 2.5%	LKHW01000545.1	16327	201295	+	99.91	95.56
NM_001134408.2	2903	CA P6 CHM1 Conservative 2.5%	LKHW01000201.1	4555126	4557223	+	100	4.45
NM_001300788.1	54954	CA P6 CHM1 Conservative 2.5%	LKHW01003411.1	320178	364389	-	99.21	69.65
NM_001300788.1	54954	CA P6 CHM1 Conservative 2.5%	LKHW01004241.1	247405	298004	+	99.95	27.96
NM_015326.4	23380	CA P6 CHM1 Conservative 2.5%	LKHW01003262.1	16038812	16119213	-	99.96	85.76
NM_015326.4	23380	CA P6 CHM1 Conservative 2.5%	LKHW01003266.1	67908	68516	-	99.83	8.95
NM_001170637.3	23380	CA P6 CHM1 Conservative 2.5%	LKHW01003262.1	16038812	16119213	-	99.96	85.76
NM_001170637.3	23380	CA P6 CHM1 Conservative 2.5%	LKHW01003266.1	67908	68516	-	99.83	8.95
NM_001300952.1	23380	CA P6 CHM1 Conservative 2.5%	LKHW01003262.1	16047092	16119213	-	99.97	80.39
NM_001300952.1	23380	CA P6 CHM1 Conservative 2.5%	LKHW01003266.1	67908	68516	-	99.83	12.34
NM_000820.3	2621	CA P6 CHM1 Conservative 2.5%	LKHW01001975.1	1477864	1489486	-	100	49.07
NM_000820.3	2621	CA P6 CHM1 Conservative 2.5%	LKHW01003049.1	306	31639	-	98.57	41.08
NM_001302371.1	100132406	CA P6 CHM1 Conservative 2.5%	LKHW01001269.1	583	39949	+	98.36	55.68
NM_001302371.1	100132406	CA P6 CHM1 Conservative 2.5%	LKHW01000505.1	2922	29414	+	96.71	28.44
NM_001303013.1	9651	CA P6 CHM1 Conservative 2.5%	LKHW01003738.1	146383	172118	-	99.9	73.51
NM_001303013.1	9651	CA P6 CHM1 Conservative 2.5%	LKHW01004310.1	535	1979	-	97.73	24.7
NM_014638.3	9651	CA P6 CHM1 Conservative 2.5%	LKHW01003738.1	146383	172118	-	99.9	88.7
NM_014638.3	9651	CA P6 CHM1 Conservative 2.5%	LKHW01004310.1	1582	1979	-	100	8.19
NM_130445.3	80781	CA P6 CHM1 Conservative 2.5%	LKHW01002171.1	6405	16127	+	99.96	48.86
NM_130445.3	80781	CA P6 CHM1 Conservative 2.5%	LKHW01003974.1	845	73569	-	100	20.2
NM_015201.4	23246	CA P6 CHM1 Conservative 2.5%	LKHW01002339.1	5128	19360	+	100	84.67
NM_015201.4	23246	CA P6 CHM1 Conservative 2.5%	LKHW01004140.1	69391	71737	+	99.73	15.57
NM_178568.3	146760	CA P6 CHM1 Conservative 2.5%	LKHW01002634.1	786395	789523	-	99.64	86.28
NM_178568.3	146760	CA P6 CHM1 Conservative 2.5%	LKHW01003550.1	332745	333238	+	100	13.62
NM_014695.2	9720	CA P6 CHM1 Conservative 2.5%	LKHW01004538.1	4256	63315	-	99.53	63.25
NM_014695.2	9720	CA P6 CHM1 Conservative 2.5%	LKHW01000029.1	4903340	4912513	-	95.41	9.27
NM_032134.2	84074	CA P6 CHM1 Conservative 2.5%	LKHW01001133.1	4381291	4401779	+	99.97	68.3
NM_032134.2	84074	CA P6 CHM1 Conservative 2.5%	LKHW01002155.1	44	1942	+	100	6.04
NM_001304360.1	85452	CA P6 CHM1 Conservative 2.5%	LKHW01003229.1	193	60029	-	99.81	48.89
NM_001304360.1	85452	CA P6 CHM1 Conservative 2.5%	LKHW01003232.1	1	19031	+	99.8	46.24
NM_001306068.1	100288687	CA P6 CHM1 Conservative 2.5%	LKHW01000778.1	101861	102804	-	96.89	31.92
NM_001306068.1	100288687	CA P6 CHM1 Conservative 2.5%	LKHW01004585.1	1	1258	-	98.81	73.56
NM_002847.4	5799	CA P6 CHM1 Conservative 2.5%	LKHW01000218.1	8542	611246	+	99.84	78.4
NM_002847.4	5799	CA P6 CHM1 Conservative 2.5%	LKHW01002331.1	773324	1191750	+	99.52	21.54
NM_130842.3	5799	CA P6 CHM1 Conservative 2.5%	LKHW01000218.1	8542	611246	+	99.84	79.23
NM_130842.3	5799	CA P6 CHM1 Conservative 2.5%	LKHW01002331.1	773324	1191750	+	99.49	20.71
NM_130843.3	5799	CA P6 CHM1 Conservative 2.5%	LKHW01000218.1	8542	611246	+	99.83	78
NM_130843.3	5799	CA P6 CHM1 Conservative 2.5%	LKHW01002331.1	773324	1191750	+	99.52	21.94
NM_001308267.1	5799	CA P6 CHM1 Conservative 2.5%	LKHW01000218.1	8542	611246	+	99.84	80.29
NM_001308267.1	5799	CA P6 CHM1 Conservative 2.5%	LKHW01002331.1	773324	1191750	+	99.46	19.66
NM_001308268.1	5799	CA P6 CHM1 Conservative 2.5%	LKHW01000218.1	8542	611246	+	99.84	76.72
NM_001308268.1	5799	CA P6 CHM1 Conservative 2.5%	LKHW01002331.1	819440	1191750	+	99.56	23.22
NM_001310154.1	400986	CA P6 CHM1 Conservative 2.5%	LKHW01002229.1	35102	121876	-	97.19	74.28
NM_001310154.1	400986	CA P6 CHM1 Conservative 2.5%	LKHW01000455.1	7605	29993	+	92.67	11.26
NM_014717.2	9745	CA P6 CHM1 Conservative 2.5%	LKHW01001404.1	2439162	2462390	-	99.77	53.24
NM_014717.2	9745	CA P6 CHM1 Conservative 2.5%	LKHW01001254.1	14670	87974	-	99.57	47.36
NR_003569.1	653190	CA P6 CHM1 Conservative 2.5%	LKHW01000207.1	24755	37240	-	100	74.7
NR_003569.1	653190	CA P6 CHM1 Conservative 2.5%	LKHW01004516.1	32001	35903	+	98.6	18.21
NR_003670.1	654466	CA P6 CHM1 Conservative 2.5%	LKHW01003459.1	86500	91635	-	99.87	86.04
NR_003670.1	654466	CA P6 CHM1 Conservative 2.5%	LKHW01004627.1	50172	69330	+	94.16	17.21
NR_024204.1	112597	CA P6 CHM1 Conservative 2.5%	LKHW01000278.1	35684	35990	+	100	37.99
NR_024204.1	112597	CA P6 CHM1 Conservative 2.5%	LKHW01000276.1	45954	70881	+	99.4	60.38
NR_024205.1	112597	CA P6 CHM1 Conservative 2.5%	LKHW01000278.1	35682	35990	+	100	47.98
NR_024205.1	112597	CA P6 CHM1 Conservative 2.5%	LKHW01000276.1	45954	63365	+	99.7	50.75
NR_024206.1	112597	CA P6 CHM1 Conservative 2.5%	LKHW01000278.1	35684	35990	+	100	61.64
NR_024206.1	112597	CA P6 CHM1 Conservative 2.5%	LKHW01000276.1	45954	69035	+	95.63	47.87
NR_015395.1	541471	CA P6 CHM1 Conservative 2.5%	LKHW01000278.1	77971	98330	+	97.17	79.22
NR_015395.1	541471	CA P6 CHM1 Conservative 2.5%	LKHW01004447.1	3574	3806	-	97.86	28.43
NR_024373.1	541471	CA P6 CHM1 Conservative 2.5%	LKHW01000278.1	35681	35995	+	98.41	58.01
NR_024373.1	541471	CA P6 CHM1 Conservative 2.5%	LKHW01004447.1	3577	3806	-	98.26	40.75
NR_024397.1	728190	CA P6 CHM1 Conservative 2.5%	LKHW01000354.1	61035	68583	-	99.67	37.22
NR_024397.1	728190	CA P6 CHM1 Conservative 2.5%	LKHW01003209.1	2308432	2308751	+	97.18	38.42
NR_026999.1	349114	CA P6 CHM1 Conservative 2.5%	LKHW01004437.1	4232131	4247487	-	99.73	82.23
NR_026999.1	349114	CA P6 CHM1 Conservative 2.5%	LKHW01001694.1	3298	40804	-	100	17.86
NR_027044.1	440040	CA P6 CHM1 Conservative 2.5%	LKHW01001830.1	545976	572554	-	99.47	52.22
NR_027044.1	440040	CA P6 CHM1 Conservative 2.5%	LKHW01003470.1	750096	976668	+	97.66	58.74
NR_027270.1	391267	CA P6 CHM1 Conservative 2.5%	LKHW01004082.1	69382	70124	+	99.73	67.85
NR_027270.1	391267	CA P6 CHM1 Conservative 2.5%	LKHW01001417.1	7969	29764	+	94.03	40.54
NR_029411.1	100133091	CA P6 CHM1 Conservative 2.5%	LKHW01001125.1	25479	61882	+	99.14	78.1
NR_029411.1	100133091	CA P6 CHM1 Conservative 2.5%	LKHW01002165.1	60135	62315	+	100	23
NR_029426.1	11039	CA P6 CHM1 Conservative 2.5%	LKHW01003864.1	190130	193717	-	99.79	50.23
NR_029426.1	11039	CA P6 CHM1 Conservative 2.5%	LKHW01001906.1	1380	67067	-	99.18	25.21
NR_027028.2	728411	CA P6 CHM1 Conservative 2.5%	LKHW01004202.1	12228	18110	-	99.77	63.86
NR_027028.2	728411	CA P6 CHM1 Conservative 2.5%	LKHW01002964.1	315368	317770	-	96.13	36.41
NR_033856.1	644316	CA P6 CHM1 Conservative 2.5%	LKHW01003609.1	2465	9603	+	99.88	69.41
NR_033856.1	644316	CA P6 CHM1 Conservative 2.5%	LKHW01003418.1	2273	13411	-	99.85	27.44
NR_036432.1	283755	CA P6 CHM1 Conservative 2.5%	LKHW01000970.1	60097	95298	-	99.92	87.81
NR_036432.1	283755	CA P6 CHM1 Conservative 2.5%	LKHW01000979.1	450033	478548	+	96.31	9.41
NR_036614.1	166614	CA P6 CHM1 Conservative 2.5%	LKHW01004239.1	6140465	6312252	+	100	64.99
NR_036614.1	166614	CA P6 CHM1 Conservative 2.5%	LKHW01003225.1	3592	7572	+	99.47	34.93
NR_036647.1	284047	CA P6 CHM1 Conservative 2.5%	LKHW01001981.1	737	58267	-	99.09	77.93
NR_036647.1	284047	CA P6 CHM1 Conservative 2.5%	LKHW01001979.1	370635	413238	+	98.57	29.63
NR_027145.2	100271835	CA P6 CHM1 Conservative 2.5%	LKHW01001163.1	2313	67415	+	99.46	81.23
NR_027145.2	100271835	CA P6 CHM1 Conservative 2.5%	LKHW01001165.1	14281	19385	+	99.85	21.87
NR_037597.1	442028	CA P6 CHM1 Conservative 2.5%	LKHW01001468.1	3157	26471	+	94.56	85.01
NR_037597.1	442028	CA P6 CHM1 Conservative 2.5%	LKHW01002482.1	34347	51675	-	99.58	14.44
NR_037859.2	100532742	CA P6 CHM1 Conservative 2.5%	LKHW01001591.1	1325	129553	-	99.84	49.53
NR_037859.2	100532742	CA P6 CHM1 Conservative 2.5%	LKHW01001095.1	593	13199	+	100	50.65
NR_038257.1	7226	CA P6 CHM1 Conservative 2.5%	LKHW01002335.1	1085091	1138888	+	99.9	52.27
NR_038257.1	7226	CA P6 CHM1 Conservative 2.5%	LKHW01002492.1	327	1716	+	99.92	23.64
NR_038257.1	7226	CA P6 CHM1 Conservative 2.5%	LKHW01004364.1	4451	30835	+	99.42	20.71
NR_040000.1	339166	CA P6 CHM1 Conservative 2.5%	LKHW01004081.1	77590	119532	-	100	54.53
NR_040000.1	339166	CA P6 CHM1 Conservative 2.5%	LKHW01002630.1	757107	757901	+	99.11	42.94
NR_037668.2	6339	CA P6 CHM1 Conservative 2.5%	LKHW01004030.1	1	1565	+	99.62	35.81
NR_037668.2	6339	CA P6 CHM1 Conservative 2.5%	LKHW01004415.1	68	1973	-	98.02	20.3
NR_040073.1	100131234	CA P6 CHM1 Conservative 2.5%	LKHW01004044.1	83185	120190	-	100	60.43
NR_040073.1	100131234	CA P6 CHM1 Conservative 2.5%	LKHW01002473.1	30086	30328	+	100	40.23
NR_024054.2	11039	CA P6 CHM1 Conservative 2.5%	LKHW01000228.1	22431	28274	+	99.1	43.89
NR_024054.2	11039	CA P6 CHM1 Conservative 2.5%	LKHW01001905.1	16878	27383	+	94.17	39.76
NR_047527.1	387628	CA P6 CHM1 Conservative 2.5%	LKHW01002014.1	98004	103828	-	99.55	71.23
NR_047527.1	387628	CA P6 CHM1 Conservative 2.5%	LKHW01003459.1	82211	82768	+	98.56	25.07
NR_003674.2	387628	CA P6 CHM1 Conservative 2.5%	LKHW01002014.1	98004	100647	-	100	73.61
NR_003674.2	387628	CA P6 CHM1 Conservative 2.5%	LKHW01003459.1	82211	82787	+	97.06	27.23
NR_047578.1	2890	CA P6 CHM1 Conservative 2.5%	LKHW01000350.1	6365955	6415360	-	100	62.62
NR_047578.1	2890	CA P6 CHM1 Conservative 2.5%	LKHW01004240.1	434091	659912	+	99.25	38.76
NR_073010.1	100873065	CA P6 CHM1 Conservative 2.5%	LKHW01001096.1	74052	903074	+	97.06	61.04
NR_073010.1	100873065	CA P6 CHM1 Conservative 2.5%	LKHW01004470.1	103513	126629	-	96.75	48.65
NR_003580.2	100093631	CA P6 CHM1 Conservative 2.5%	LKHW01004722.1	1449848	1481750	+	99.87	88.44
NR_003580.2	100093631	CA P6 CHM1 Conservative 2.5%	LKHW01004744.1	37062	57466	+	96.82	12.78
NR_103556.1	100288805	CA P6 CHM1 Conservative 2.5%	LKHW01000412.1	1354	52720	+	99.53	38.86
NR_103556.1	100288805	CA P6 CHM1 Conservative 2.5%	LKHW01000410.1	2252	58786	+	99.93	36.52
NR_103556.1	100288805	CA P6 CHM1 Conservative 2.5%	LKHW01000408.1	5298	132233	+	97.11	31.1
NR_103556.1	100288805	CA P6 CHM1 Conservative 2.5%	LKHW01000024.1	1628	34546	-	98.75	6.27
NR_027777.2	5383	CA P6 CHM1 Conservative 2.5%	LKHW01000324.1	42107	42802	-	98.43	62.91
NR_027777.2	5383	CA P6 CHM1 Conservative 2.5%	LKHW01004464.1	27343	31353	+	98.49	30
NR_002206.3	2970	CA P6 CHM1 Conservative 2.5%	LKHW01004722.1	1449848	1481750	+	99.84	88.61
NR_002206.3	2970	CA P6 CHM1 Conservative 2.5%	LKHW01004744.1	37067	37479	+	100	11.38
NR_104189.1	100873165	CA P6 CHM1 Conservative 2.5%	LKHW01000365.1	31255	33986	+	99.67	86.82
NR_104189.1	100873165	CA P6 CHM1 Conservative 2.5%	LKHW01004838.1	4220	28076	-	94.58	16.69
NR_104292.1	25771	CA P6 CHM1 Conservative 2.5%	LKHW01001970.1	6130	292390	+	97.74	75.65
NR_104292.1	25771	CA P6 CHM1 Conservative 2.5%	LKHW01003582.1	1670	119167	-	99.25	31.39
NR_109776.1	395	CA P6 CHM1 Conservative 2.5%	LKHW01001708.1	271677	424696	+	99.87	72.51
NR_109776.1	395	CA P6 CHM1 Conservative 2.5%	LKHW01001095.1	3691341	3692801	+	99.93	27.54
NR_109983.1	729218	CA P6 CHM1 Conservative 2.5%	LKHW01000791.1	19977	46283	-	99.86	89.1
NR_109983.1	729218	CA P6 CHM1 Conservative 2.5%	LKHW01003861.1	25656	48446	+	96.54	12.56
NR_110220.1	101927289	CA P6 CHM1 Conservative 2.5%	LKHW01004648.1	13280	14554	+	100	33.68
NR_110220.1	101927289	CA P6 CHM1 Conservative 2.5%	LKHW01000726.1	231793	232058	+	96.61	46.18
NR_024435.2	100133991	CA P6 CHM1 Conservative 2.5%	LKHW01000352.1	88	711	+	100	45.51
NR_024435.2	100133991	CA P6 CHM1 Conservative 2.5%	LKHW01002475.1	1853	2118	-	100	19.4
NR_110324.1	100133991	CA P6 CHM1 Conservative 2.5%	LKHW01000352.1	88	711	+	100	56.62
NR_110324.1	100133991	CA P6 CHM1 Conservative 2.5%	LKHW01002475.1	1817	2118	-	94.49	27.4
NR_038328.2	100132288	CA P6 CHM1 Conservative 2.5%	LKHW01001471.1	37209	41591	-	94.84	82.61
NR_038328.2	100132288	CA P6 CHM1 Conservative 2.5%	LKHW01003801.1	45977	48245	-	99.27	20.38
NR_111917.1	7455	CA P6 CHM1 Conservative 2.5%	LKHW01004252.1	33278	76246	+	99.9	74.02
NR_111917.1	7455	CA P6 CHM1 Conservative 2.5%	LKHW01003954.1	172746	185921	-	99.94	22.29
NR_111918.1	7455	CA P6 CHM1 Conservative 2.5%	LKHW01004252.1	33278	76246	+	99.9	75.74
NR_111918.1	7455	CA P6 CHM1 Conservative 2.5%	LKHW01003954.1	172746	185921	-	99.94	20.48
NR_111919.1	7455	CA P6 CHM1 Conservative 2.5%	LKHW01004252.1	33278	76246	+	99.9	76.32
NR_111919.1	7455	CA P6 CHM1 Conservative 2.5%	LKHW01003954.1	172746	185921	-	99.94	19.87
NR_111931.1	374977	CA P6 CHM1 Conservative 2.5%	LKHW01001250.1	2398	63408	-	99.73	88.87
NR_111931.1	374977	CA P6 CHM1 Conservative 2.5%	LKHW01003393.1	2117	3368	+	100	9.13
NR_026782.2	374977	CA P6 CHM1 Conservative 2.5%	LKHW01001250.1	2398	63408	-	99.74	89.29
NR_026782.2	374977	CA P6 CHM1 Conservative 2.5%	LKHW01003393.1	2117	3368	+	100	8.79
NR_037641.2	100527960	CA P6 CHM1 Conservative 2.5%	LKHW01001250.1	2918	63408	-	99.84	61.83
NR_037641.2	100527960	CA P6 CHM1 Conservative 2.5%	LKHW01003393.1	2117	35729	+	100	36.61
NR_037640.2	100527960	CA P6 CHM1 Conservative 2.5%	LKHW01001250.1	2398	63408	-	99.74	61.68
NR_037640.2	100527960	CA P6 CHM1 Conservative 2.5%	LKHW01003393.1	2117	35729	+	100	36.99
NR_037639.2	100527960	CA P6 CHM1 Conservative 2.5%	LKHW01001250.1	2398	63408	-	99.75	63.44
NR_037639.2	100527960	CA P6 CHM1 Conservative 2.5%	LKHW01003393.1	8621	35729	+	99.95	35.3
NR_111950.1	57234	CA P6 CHM1 Conservative 2.5%	LKHW01002477.1	8479	43284	-	98.39	91.11
NR_111950.1	57234	CA P6 CHM1 Conservative 2.5%	LKHW01000585.1	70498	79317	+	95.61	10.84
NR_120372.1	101926895	CA P6 CHM1 Conservative 2.5%	LKHW01002516.1	7115728	7137009	-	100	55.5
NR_120372.1	101926895	CA P6 CHM1 Conservative 2.5%	LKHW01004659.1	11188548	11192524	+	99.66	45.1
NR_120535.1	100996712	CA P6 CHM1 Conservative 2.5%	LKHW01000365.1	4922	28843	-	99.43	75.57
NR_120535.1	100996712	CA P6 CHM1 Conservative 2.5%	LKHW01003266.1	52812	70421	-	96.77	27.18
NR_120611.1	101060691	CA P6 CHM1 Conservative 2.5%	LKHW01003663.1	29680666	29684425	-	98.45	84.28
NR_120611.1	101060691	CA P6 CHM1 Conservative 2.5%	LKHW01003209.1	2308355	2343257	+	94.08	11.64
NR_120612.1	101060691	CA P6 CHM1 Conservative 2.5%	LKHW01003449.1	32508130	32523913	+	97.61	55.91
NR_120612.1	101060691	CA P6 CHM1 Conservative 2.5%	LKHW01003209.1	2308355	2308751	+	98.99	43.48
NR_120613.1	101060691	CA P6 CHM1 Conservative 2.5%	LKHW01003449.1	3114664	3115220	+	98.56	42.42
NR_120613.1	101060691	CA P6 CHM1 Conservative 2.5%	LKHW01003209.1	2308355	2308751	+	98.99	29.82
NR_046203.2	643648	CA P6 CHM1 Conservative 2.5%	LKHW01002014.1	76797	78722	+	99.84	54.4
NR_046203.2	643648	CA P6 CHM1 Conservative 2.5%	LKHW01004627.1	61188	65219	-	100	44.73
NR_122077.1	403323	CA P6 CHM1 Conservative 2.5%	LKHW01004626.1	777	2084	-	96.06	34.47
NR_122077.1	403323	CA P6 CHM1 Conservative 2.5%	LKHW01002018.1	9780	10449	+	98.2	65.11
NR_122076.1	403323	CA P6 CHM1 Conservative 2.5%	LKHW01002018.1	9780	17410	+	97.29	40.74
NR_122076.1	403323	CA P6 CHM1 Conservative 2.5%	LKHW01001683.1	28969678	28992359	+	89.73	38.74
NR_122076.1	403323	CA P6 CHM1 Conservative 2.5%	LKHW01003074.1	18850	21195	-	96.38	30.52
NR_123721.1	353511	CA P6 CHM1 Conservative 2.5%	LKHW01000730.1	339	28624	+	99.07	64.03
NR_123721.1	353511	CA P6 CHM1 Conservative 2.5%	LKHW01002342.1	176166	192791	+	97.65	48
NR_123740.1	57494	CA P6 CHM1 Conservative 2.5%	LKHW01003451.1	31362919	31363235	+	84.68	19.59
NR_123740.1	57494	CA P6 CHM1 Conservative 2.5%	LKHW01004234.1	7171811	7172847	-	96.06	64.29
NR_110400.2	101928469	CA P6 CHM1 Conservative 2.5%	LKHW01001589.1	86276	121575	-	99.87	72.57
NR_110400.2	101928469	CA P6 CHM1 Conservative 2.5%	LKHW01002162.1	235666	235971	+	99.67	27.69
NR_110406.2	101928469	CA P6 CHM1 Conservative 2.5%	LKHW01001589.1	86276	86789	-	99.8	55.74
NR_110406.2	101928469	CA P6 CHM1 Conservative 2.5%	LKHW01002162.1	235666	242920	+	99.75	44.68
NR_110405.2	101928469	CA P6 CHM1 Conservative 2.5%	LKHW01001589.1	86276	209809	-	99.83	67.2
NR_110405.2	101928469	CA P6 CHM1 Conservative 2.5%	LKHW01002162.1	235666	250831	+	97.27	39.48
NR_110404.2	101928469	CA P6 CHM1 Conservative 2.5%	LKHW01001589.1	86276	87146	-	99.85	68.9
NR_110404.2	101928469	CA P6 CHM1 Conservative 2.5%	LKHW01002162.1	235666	235973	+	99.67	31.3
NR_110401.2	101928469	CA P6 CHM1 Conservative 2.5%	LKHW01001589.1	86276	87146	-	99.85	62.25
NR_110401.2	101928469	CA P6 CHM1 Conservative 2.5%	LKHW01002162.1	235666	242921	+	99.75	37.92
NR_110403.2	101928469	CA P6 CHM1 Conservative 2.5%	LKHW01001589.1	86276	121572	-	99.84	61.9
NR_110403.2	101928469	CA P6 CHM1 Conservative 2.5%	LKHW01002162.1	235666	247660	+	99.37	31.43
NR_110402.2	101928469	CA P6 CHM1 Conservative 2.5%	LKHW01001589.1	86276	136242	-	98.67	64.81
NR_110402.2	101928469	CA P6 CHM1 Conservative 2.5%	LKHW01002162.1	235666	242922	+	99.51	39.69
NR_125884.1	101927305	CA P6 CHM1 Conservative 2.5%	LKHW01004048.1	10155	19006	+	100	56.82
NR_125884.1	101927305	CA P6 CHM1 Conservative 2.5%	LKHW01001578.1	15704	15983	-	98.93	44.44
NR_126023.1	101928492	CA P6 CHM1 Conservative 2.5%	LKHW01002241.1	9008	27528	-	98.68	79.91
NR_126023.1	101928492	CA P6 CHM1 Conservative 2.5%	LKHW01000461.1	10408	42160	-	95.75	26.53
NR_130142.1	9720	CA P6 CHM1 Conservative 2.5%	LKHW01004538.1	4254	63315	-	99.45	63.39
NR_130142.1	9720	CA P6 CHM1 Conservative 2.5%	LKHW01000029.1	4909807	4912513	-	97.36	8.89
NR_130649.1	84074	CA P6 CHM1 Conservative 2.5%	LKHW01001133.1	4381291	4401779	+	99.87	31.45
NR_130649.1	84074	CA P6 CHM1 Conservative 2.5%	LKHW01002155.1	44	1942	+	100	13.22
NR_038378.4	441242	CA P6 CHM1 Conservative 2.5%	LKHW01003223.1	17106	19646	+	99.78	70.79
NR_038378.4	441242	CA P6 CHM1 Conservative 2.5%	LKHW01004620.1	77727	85603	+	100	21.73
NR_130701.1	728323	CA P6 CHM1 Conservative 2.5%	LKHW01004648.1	47115	74685	+	100	39.39
NR_130701.1	728323	CA P6 CHM1 Conservative 2.5%	LKHW01004652.1	20417	21571	+	99.42	48.9
NR_130702.1	728323	CA P6 CHM1 Conservative 2.5%	LKHW01004648.1	47115	91408	+	100	37.22
NR_130702.1	728323	CA P6 CHM1 Conservative 2.5%	LKHW01004652.1	8898	21571	+	96.7	56.78
NR_130699.1	728323	CA P6 CHM1 Conservative 2.5%	LKHW01004648.1	47115	91408	+	100	42.43
NR_130699.1	728323	CA P6 CHM1 Conservative 2.5%	LKHW01004652.1	20415	21571	+	99.42	46.58
NR_130700.1	728323	CA P6 CHM1 Conservative 2.5%	LKHW01004648.1	47115	74685	+	100	32.06
NR_130700.1	728323	CA P6 CHM1 Conservative 2.5%	LKHW01004652.1	20417	21571	+	99.42	54.81
NR_132337.1	642776	CA P6 CHM1 Conservative 2.5%	LKHW01000140.1	40656	40840	+	99.45	55.05
NR_132337.1	642776	CA P6 CHM1 Conservative 2.5%	LKHW01000138.1	3763553	3763705	+	100	45.53

## Sheet: low_cds_cov
#Transcript accession	GeneID	Assembly	Scaffold accession	Start	End	Strand	% identity	% coverage
NM_001187.1	574	GRCh38	NT_029490.5	89193	130334	+	98.18	93.52
NM_181704.1	85317	GRCh38	NT_187501.1	42478	61075	-	97.8	54.45
NM_138352.1	90378	GRCh38	NT_011295.12	14028417	14030420	-	99.92	80.33
NM_002929.2	6011	GRCh38	NT_024498.13	53	12644	+	99.7	48
NM_002929.2	6011	GRCh38	NT_027140.7	1823838	1828218	+	99.72	52.19
NM_001012709.1	387267	GRCh38	NT_009237.19	1560958	1562138	-	99.57	86.75
NM_001733.4	715	GRCh38	NT_009714.18	1210	7797	-	99.92	52.77
NM_001733.4	715	GRCh38	NT_009759.17	7070209	7072108	-	100	46.8
NM_182705.2	359845	GRCh38	NT_024972.9	379978	385940	-	100	92.99
NM_003890.2	8857	GRCh38	NT_011109.17	12622449	12693752	-	99.6	78.23
NM_001100631.1	653606	GRCh38	NT_032977.10	12419060	12419636	+	97.92	39.9
NM_001122636.1	50614	GRCh38	NT_029419.13	94961120	94968438	-	100	55.2
NM_001122636.1	50614	GRCh38	NT_024477.15	14315	104957	-	98.58	47.31
NM_001143962.1	388743	GRCh38	NT_167186.2	218	56799	-	100	66.87
NM_001143962.1	388743	GRCh38	NT_004487.20	80357022	80373580	-	99.87	33.12
NM_017940.4	55672	GRCh38	NT_032977.10	15976439	16027617	-	99.2	95.57
NM_002457.3	4583	GRCh38	NT_009237.19	1014875	1050508	+	98.29	80.4
NM_006220.2	390502	GRCh38	NT_026437.13	76140115	76143179	-	99.62	78.75
NM_001077693.3	641700	GRCh38	NT_034772.7	89338747	89339367	-	100	43.58
NM_001077693.3	641700	GRCh38	NT_029289.12	943	9084	-	100	55.66
NM_001293739.1	641700	GRCh38	NT_034772.7	89338747	89339367	-	100	34.92
NM_001293739.1	641700	GRCh38	NT_029289.12	943	9084	-	100	64.07
NM_001291281.2	100132074	GRCh38	NT_032977.10	40775943	40797603	+	99.87	92.27
NM_001187.1	574	CHM1_1.1	NW_004929425.1	333902	374999	-	98.18	93.52
NM_021192.2	3237	CHM1_1.1	NW_004929305.1	27181488	27183737	+	100	95.83
NM_004977.2	3748	CHM1_1.1	NW_004929415.1	22693981	22707817	-	99.93	96.06
NM_005636.3	6759	CHM1_1.1	NW_004929439.1	11113311	11122568	-	97.54	88.33
NM_175729.1	6759	CHM1_1.1	NW_004929439.1	11113311	11122568	-	98.85	87.97
NM_020689.3	57419	CHM1_1.1	NW_004929416.1	19202244	19644077	+	99.83	91.28
NM_138352.1	90378	CHM1_1.1	NW_004929414.1	5463109	5465070	-	99.91	76.99
NM_199357.1	9824	CHM1_1.1	NW_004929398.1	1732794	1780494	+	96.86	78.68
NM_006613.3	10750	CHM1_1.1	NW_004929405.1	18527378	18553772	-	99.74	94.93
NM_002929.2	6011	CHM1_1.1	NW_004929390.1	1817923	1822255	+	99.9	52.09
NM_002929.2	6011	CHM1_1.1	NW_004929391.1	51	12015	+	99.7	48
NM_001005277.1	81399	CHM1_1.1	NW_004929288.1	100078	100665	-	99.82	62.61
NM_001005484.1	79501	CHM1_1.1	NW_004929286.1	59599	60005	+	99.5	44.33
NM_001006943.1	2046	CHM1_1.1	NW_004929289.1	19025053	19045591	+	99.69	88.3
NM_001007524.1	474384	CHM1_1.1	NW_004929448.1	5805815	5806156	+	100	30.64
NM_001007523.1	474383	CHM1_1.1	NW_004929448.1	5805815	5806156	+	100	30.64
NM_012151.3	8263	CHM1_1.1	NW_004929448.1	5805815	5806727	+	99.89	53.64
NM_017797.3	55643	CHM1_1.1	NW_004929412.1	1925030	1982053	-	99.59	95.22
NM_001012709.1	387267	CHM1_1.1	NW_004929378.1	1581126	1582341	-	98.35	88.52
NM_001733.4	715	CHM1_1.1	NW_004929382.1	7126493	7128392	-	100	46.8
NM_001733.4	715	CHM1_1.1	NW_004929383.1	1329	5167	-	99.9	43.46
NM_013452.2	26609	CHM1_1.1	NW_004929438.1	5642603	5644333	+	99.51	84.48
NM_007293.2	720	CHM1_1.1	NW_004929326.1	31891915	31912655	+	99.92	72.33
NM_000651.4	1378	CHM1_1.1	NW_004929294.1	1446020	1591279	+	99.86	86.59
NM_005515.3	3110	CHM1_1.1	NW_004929334.1	2427159	2432845	-	99.94	91.26
NM_004607.2	6902	CHM1_1.1	NW_004929325.1	2607068	2607261	+	93.87	28.27
NM_001042362.2	26095	CHM1_1.1	NW_004929375.1	667707	729447	-	99.74	93.11
NM_001042359.2	26095	CHM1_1.1	NW_004929375.1	667707	729447	-	99.78	94.14
NM_015605.7	26095	CHM1_1.1	NW_004929375.1	667707	758569	-	99.75	96.73
NM_001042357.3	26095	CHM1_1.1	NW_004929375.1	667707	737742	-	99.79	97.26
NM_001042358.3	26095	CHM1_1.1	NW_004929375.1	667707	729447	-	99.78	95.01
NM_001042361.3	26095	CHM1_1.1	NW_004929375.1	667707	729447	-	99.72	93.83
NM_006237.3	5457	CHM1_1.1	NW_004929388.1	60121107	60125483	-	97.04	97.32
NM_153813.2	161882	CHM1_1.1	NW_004929403.1	80627	162187	+	99.56	92.44
NM_003185.3	6874	CHM1_1.1	NW_004929418.1	30745940	30836947	-	99.8	88.02
NM_013233.2	27347	CHM1_1.1	NW_004929305.1	19019968	19313525	-	99.62	97.37
NM_182705.2	359845	CHM1_1.1	NW_004929404.1	288551	294511	-	99.8	92.93
NM_005577.2	4018	CHM1_1.1	NW_004929328.1	65288155	65421920	-	99.79	89.99
NM_001079530.1	653275	CHM1_1.1	NW_004929304.1	21098457	21105211	-	99.16	81.98
NM_004852.2	9480	CHM1_1.1	NW_004929411.1	2894002	2949495	+	99.7	98.64
NM_001005221.2	729759	CHM1_1.1	NW_004929288.1	100078	100665	-	99.82	62.61
NM_001080488.1	390874	CHM1_1.1	NW_004929412.1	1693232	1715046	+	100	76.9
NM_031215.2	81928	CHM1_1.1	NW_004929418.1	31159892	31178558	-	99.83	97.93
NM_001085423.1	284021	CHM1_1.1	NW_004929407.1	37200015	37203208	+	99.84	43.71
NM_001085474.1	646627	CHM1_1.1	NW_004929294.1	42678823	42679278	-	97.4	38.23
NM_007329.2	1755	CHM1_1.1	NW_004929376.1	75244364	75324588	+	99.35	87.71
NM_017579.2	1755	CHM1_1.1	NW_004929376.1	75244364	75324588	+	99.21	87.52
NM_015321.2	23373	CHM1_1.1	NW_004929414.1	10117075	10156457	+	99.94	97.01
NM_001098482.1	23373	CHM1_1.1	NW_004929414.1	10117075	10156457	+	99.94	97.03
NM_001080482.2	389813	CHM1_1.1	NW_004929369.1	521853	524808	+	99.96	92.59
NM_001098612.1	100049587	CHM1_1.1	NW_004929415.1	23995221	24025339	-	95.65	53.19
NM_032450.2	727957	CHM1_1.1	NW_004929340.1	58477436	58578396	+	98.84	38.72
NM_001099661.1	728689	CHM1_1.1	NW_004929400.1	29344042	29366909	-	97.35	78.41
NM_001099697.1	728194	CHM1_1.1	NW_004929329.1	5955403	5999918	-	99.18	93.72
NM_000836.2	2906	CHM1_1.1	NW_004929415.1	20773598	20823444	+	99.95	89.37
NM_001194.3	610	CHM1_1.1	NW_004929412.1	529749	556575	+	99.33	92.16
NM_030761.4	54361	CHM1_1.1	NW_004929289.1	18573291	18593523	-	99.65	95.64
NM_173565.3	222967	CHM1_1.1	NW_004929329.1	6783330	6828017	+	99.67	88.4
NM_001105549.1	55769	CHM1_1.1	NW_004929415.1	24531138	25016729	-	98.65	57.81
NM_001105550.1	55769	CHM1_1.1	NW_004929415.1	24531138	25016729	-	98.62	56.09
NM_001105551.1	55769	CHM1_1.1	NW_004929415.1	24531138	25016729	-	98.64	56.49
NM_001105552.1	55769	CHM1_1.1	NW_004929415.1	24531138	25016729	-	98.53	54.52
NM_020066.4	56776	CHM1_1.1	NW_004929294.1	34032554	34414279	+	99.86	93.71
NM_203304.3	399664	CHM1_1.1	NW_004929412.1	1494942	1518187	-	99.45	96.52
NM_001113738.1	51326	CHM1_1.1	NW_004929407.1	18490016	18497692	+	97.68	92.18
NM_016632.2	51326	CHM1_1.1	NW_004929407.1	37627685	37628232	+	96.79	53.41
NM_001080511.2	154790	CHM1_1.1	NW_004929332.1	77774015	77794985	+	100	93.55
NM_001122636.1	50614	CHM1_1.1	NW_004929386.1	9952333	9959663	-	99.93	55.2
NM_001122636.1	50614	CHM1_1.1	NW_004929387.1	10992	96950	-	99.91	44.62
NM_001002029.3	721	CHM1_1.1	NW_004929326.1	31891915	31912656	+	99.59	72.34
NM_020180.3	56853	CHM1_1.1	NW_004929410.1	16304030	16546410	-	99.97	83.24
NM_001025087.1	56853	CHM1_1.1	NW_004929410.1	16304030	16546410	-	99.97	83.23
NM_001025088.1	56853	CHM1_1.1	NW_004929410.1	16304030	16546410	-	99.97	83.22
NM_001025089.1	56853	CHM1_1.1	NW_004929410.1	16304030	16546410	-	99.96	82.76
NM_014654.3	9672	CHM1_1.1	NW_004929290.1	1315250	1324522	-	99.89	96.34
NM_024927.4	79990	CHM1_1.1	NW_004929407.1	15730210	15739211	-	100	85
NM_001129778.1	400581	CHM1_1.1	NW_004929405.1	18599910	18600429	-	99.03	53.46
NM_001129778.1	400581	CHM1_1.1	NW_004929405.1	18634292	18639610	+	99.69	34.33
NM_173678.2	285966	CHM1_1.1	NW_004929333.1	4105597	4110754	+	97.89	69.89
NM_001130025.1	285966	CHM1_1.1	NW_004929333.1	4105597	4110754	+	97.89	69.56
NM_178314.3	353116	CHM1_1.1	NW_004929386.1	1280079	1290336	-	99.57	26.75
NM_033129.3	85508	CHM1_1.1	NW_004929416.1	582279	596827	-	99.91	98.29
NM_031866.2	8325	CHM1_1.1	NW_004929370.1	35867106	35870322	-	99.1	93.78
NM_005360.4	4094	CHM1_1.1	NW_004929402.1	33246805	33253539	-	99.71	94.14
NM_001031804.2	4094	CHM1_1.1	NW_004929402.1	33246805	33253539	-	99.76	97.73
NM_001134651.1	317649	CHM1_1.1	NW_004929310.1	5458523	5504563	-	99.98	99.22
NM_001135649.1	344167	CHM1_1.1	NW_004929300.1	67569566	67573888	-	100	88.28
NM_005434.4	7851	CHM1_1.1	NW_004929304.1	785875	793758	+	99.63	71.14
NM_005434.4	7851	CHM1_1.1	NW_004929304.1	584091	622900	-	98.2	35.98
NM_146421.2	2944	CHM1_1.1	NW_004929290.1	80170334	80189277	+	96.78	92.73
NM_001143987.1	653149	CHM1_1.1	NW_004929290.1	78737721	78758123	-	99.5	90.59
NM_001143988.1	653149	CHM1_1.1	NW_004929290.1	78737721	78758123	-	99.48	90.21
NM_001143962.1	388743	CHM1_1.1	NW_004929294.1	17491741	17629034	-	99.44	88.25
NM_001144931.1	391322	CHM1_1.1	NW_004929430.1	3711969	3736898	+	93.12	72.82
NM_016836.3	5937	CHM1_1.1	NW_004929305.1	11338549	11433782	-	99.97	87.98
NM_002897.4	5937	CHM1_1.1	NW_004929305.1	11338549	11433782	-	99.97	87.95
NM_001145026.1	374462	CHM1_1.1	NW_004929384.1	42982908	43218698	+	99.81	94.21
NM_001145026.1	374462	CHM1_1.1	NW_004929384.1	42994069	43025155	-	98.39	6.93
NM_001145139.1	100132994	CHM1_1.1	NW_004929443.1	9197923	9252523	-	94.64	62.34
NM_001145140.1	100130361	CHM1_1.1	NW_004929443.1	9197923	9252523	-	94.64	62.34
NM_016379.3	51481	CHM1_1.1	NW_004929438.1	4333958	4335398	-	99.89	93.96
NM_001146336.1	283953	CHM1_1.1	NW_004929400.1	8560041	8562765	-	99.84	68.14
NM_001143989.2	148545	CHM1_1.1	NW_004929290.1	78737357	78758123	-	100	91.63
NM_003007.3	6406	CHM1_1.1	NW_004929418.1	14033387	14035984	+	99.86	89.23
NM_013227.3	176	CHM1_1.1	NW_004929399.1	4421150	4492202	+	99.79	90.32
NM_001135.3	176	CHM1_1.1	NW_004929399.1	4421150	4492202	+	99.79	89.99
NM_001113239.2	28996	CHM1_1.1	NW_004929332.1	77811570	77907640	-	99.7	91.41
NM_001113239.2	28996	CHM1_1.1	NW_004929333.1	11353	73225	-	100	8.46
NM_022740.4	28996	CHM1_1.1	NW_004929332.1	77811570	77907640	-	99.7	91.46
NM_022740.4	28996	CHM1_1.1	NW_004929333.1	11353	73225	-	100	8.42
NM_001078170.2	729857	CHM1_1.1	NW_004929300.1	65963541	66061714	+	98.51	84.8
NM_001190214.1	9677	CHM1_1.1	NW_004929398.1	14768817	14924904	-	99.47	84.01
NM_001130859.2	9677	CHM1_1.1	NW_004929398.1	14768817	14924904	-	99.61	82.99
NM_001130858.2	9677	CHM1_1.1	NW_004929398.1	14768817	14924904	-	99.62	83.22
NM_014659.5	9677	CHM1_1.1	NW_004929398.1	14768817	14919451	-	99.6	82.75
NM_001190764.1	388564	CHM1_1.1	NW_004929415.1	27757556	27762600	-	99.82	88.21
NM_001199142.1	8663	CHM1_1.1	NW_004929400.1	29651601	29698789	+	99.36	62.45
NM_000442.4	5175	CHM1_1.1	NW_004929407.1	37135647	37143728	-	99.75	65.1
NM_144653.4	138151	CHM1_1.1	NW_004929368.1	1806598	1895790	-	99.39	90.86
NM_030801.3	81557	CHM1_1.1	NW_004929441.1	1610246	1905468	+	94.51	43.42
NM_177535.2	81557	CHM1_1.1	NW_004929441.1	1592000	1905468	+	94.15	46.5
NM_177537.2	81557	CHM1_1.1	NW_004929441.1	1592000	1905468	+	94.21	46.74
NM_001242362.1	81557	CHM1_1.1	NW_004929441.1	1610246	1905468	+	94.39	44.1
NM_014138.4	29057	CHM1_1.1	NW_004929442.1	682507	692455	+	99.7	61.1
NM_001242489.1	29057	CHM1_1.1	NW_004929442.1	682990	692455	+	99.64	53.42
NM_001242490.1	29057	CHM1_1.1	NW_004929442.1	682995	692455	+	99.75	58.05
NM_001242491.1	29057	CHM1_1.1	NW_004929442.1	681209	692455	+	99.75	60.12
NM_001242492.1	29057	CHM1_1.1	NW_004929442.1	675494	692455	+	99.68	49.14
NM_001242493.1	29057	CHM1_1.1	NW_004929442.1	682507	692455	+	99.58	52.4
NM_001242494.1	29057	CHM1_1.1	NW_004929442.1	683387	692455	+	98.78	45.68
NM_001242495.1	29057	CHM1_1.1	NW_004929442.1	683387	692455	+	98.62	42.7
NM_001242496.1	29057	CHM1_1.1	NW_004929442.1	683404	692455	+	99.62	47.82
NM_001242497.1	29057	CHM1_1.1	NW_004929442.1	683404	692455	+	99.57	44.76
NM_018406.6	4585	CHM1_1.1	NW_004929312.1	1427237	1492989	-	98.8	93.67
NM_001080529.2	644150	CHM1_1.1	NW_004929329.1	29836374	29946782	+	97.63	97.89
NM_001242823.2	100293534	CHM1_1.1	NW_004929326.1	31924848	31945386	+	99.15	73.72
NM_177536.3	6817	CHM1_1.1	NW_004929400.1	30426486	30462085	+	93.24	56
NM_001144064.2	100129239	CHM1_1.1	NW_004929447.1	2322597	2338899	-	97.03	53.88
NM_001144064.2	100129239	CHM1_1.1	NW_004929447.1	2334344	2334579	+	100	53.88
NM_001244892.1	100133053	CHM1_1.1	NW_004929447.1	2322597	2338899	-	97.03	53.88
NM_001244892.1	100133053	CHM1_1.1	NW_004929447.1	2334344	2334579	+	100	53.88
NM_004522.2	3800	CHM1_1.1	NW_004929305.1	3212	92690	+	99.93	90.11
NM_004522.2	3800	CHM1_1.1	NW_004929304.1	39383106	39437235	+	100	9.87
NM_001252204.1	720	CHM1_1.1	NW_004929326.1	31891915	31912655	+	99.92	71.61
NM_001034832.3	548313	CHM1_1.1	NW_004929439.1	11113311	11122568	-	97.54	87.54
NM_001040612.2	548313	CHM1_1.1	NW_004929439.1	11113311	11122568	-	98.85	87.08
NM_005249.4	2290	CHM1_1.1	NW_004929393.1	10235018	10238135	+	96.57	96.94
NM_021988.5	7335	CHM1_1.1	NW_004929416.1	3281142	3282956	-	94.11	71.31
NM_199144.2	7335	CHM1_1.1	NW_004929416.1	3281142	3282956	-	94.11	73.53
NM_001257393.1	7335	CHM1_1.1	NW_004929416.1	3281142	3282956	-	94.11	77.66
NM_032545.3	55997	CHM1_1.1	NW_004929304.1	21097842	21105108	-	99.59	87.5
NM_001270420.1	55997	CHM1_1.1	NW_004929304.1	21097842	21105108	-	99.65	93.57
NM_006327.3	100287932	CHM1_1.1	NW_004929376.1	2513597	2544757	-	99.72	87.76
NM_001271856.1	160622	CHM1_1.1	NW_004929384.1	14548880	14554264	+	95.95	96.56
NM_001272061.1	728239	CHM1_1.1	NW_004929441.1	1610246	1905468	+	94.39	44.1
NM_001098800.2	728239	CHM1_1.1	NW_004929441.1	1592000	1905468	+	94.21	46.74
NM_001272062.1	728239	CHM1_1.1	NW_004929441.1	1592000	1905468	+	94.15	46.5
NM_001272063.1	728239	CHM1_1.1	NW_004929441.1	1610246	1905468	+	94.51	43.42
NM_001098844.2	653567	CHM1_1.1	NW_004929370.1	17729873	18029797	+	99.36	69.38
NM_002438.3	4360	CHM1_1.1	NW_004929370.1	17791292	17893118	+	99.05	60.74
NM_001277423.1	100996648	CHM1_1.1	NW_004929444.1	25011760	25020379	-	97.67	72.92
NM_001277945.1	55769	CHM1_1.1	NW_004929415.1	24531138	25069019	-	98.69	58.56
NM_001277946.1	55769	CHM1_1.1	NW_004929415.1	24531138	25069019	-	98.51	55.38
NM_001277947.1	55769	CHM1_1.1	NW_004929415.1	24531138	25069019	-	98.65	57.79
NM_001277948.1	55769	CHM1_1.1	NW_004929415.1	24531138	25069019	-	98.65	56.74
NM_001277949.1	55769	CHM1_1.1	NW_004929415.1	24531138	25069019	-	98.63	57.32
NM_001277951.1	55769	CHM1_1.1	NW_004929415.1	24531138	25016729	-	98.38	53.23
NM_001277952.1	55769	CHM1_1.1	NW_004929415.1	24531138	25016729	-	98.63	56.4
NM_003585.4	8447	CHM1_1.1	NW_004929404.1	6004	30168	-	99.9	53.1
NM_178043.2	55132	CHM1_1.1	NW_004929320.1	4425098	4446400	+	90.45	83.3
NM_003147.5	6757	CHM1_1.1	NW_004929442.1	480823	569669	-	96.32	71.61
NM_175698.2	6757	CHM1_1.1	NW_004929442.1	480823	569669	-	97.37	68.49
NM_001278697.1	6757	CHM1_1.1	NW_004929442.1	480823	569669	-	96.97	70.24
NM_173600.2	283463	CHM1_1.1	NW_004929384.1	2930633	3107144	+	99.43	94.33
NM_031308.3	83481	CHM1_1.1	NW_004929340.1	58201062	58214201	-	99.97	49.99
NM_001267574.2	8663	CHM1_1.1	NW_004929400.1	29665307	29698789	+	99.31	54.22
NM_001037808.2	8663	CHM1_1.1	NW_004929400.1	29646766	29698789	+	99	57.48
NM_001286478.1	8663	CHM1_1.1	NW_004929400.1	29677384	29698789	+	99.64	55.37
NM_003752.4	8663	CHM1_1.1	NW_004929400.1	29665307	29698789	+	99.31	56.64
NM_002457.3	4583	CHM1_1.1	NW_004929378.1	1013796	1043732	+	99.37	59.23
NM_173611.3	283742	CHM1_1.1	NW_004929398.1	9689961	9723488	+	98.09	98.35
NM_001288813.1	51326	CHM1_1.1	NW_004929407.1	18532938	18534711	+	99.15	81.65
NM_001288812.1	51326	CHM1_1.1	NW_004929407.1	18544543	18553110	+	99.71	47.2
NM_001288814.1	727957	CHM1_1.1	NW_004929341.1	14228	45135	+	95.09	6.17
NM_001288814.1	727957	CHM1_1.1	NW_004929340.1	58480238	58578396	+	98.77	37.46
NM_001288811.1	51326	CHM1_1.1	NW_004929407.1	18524593	18534711	+	99.08	82.41
NM_001289931.1	255403	CHM1_1.1	NW_004929313.1	144494	147744	+	100	90.45
NM_001039127.5	255403	CHM1_1.1	NW_004929313.1	114195	147744	+	99.79	94.84
NM_001289930.1	255403	CHM1_1.1	NW_004929313.1	114195	147744	+	99.82	95.66
NM_006220.2	390502	CHM1_1.1	NW_004929393.1	75767776	75770844	-	99.81	78.38
NM_001290033.1	26958	CHM1_1.1	NW_004929332.1	68860469	68918236	-	99.4	26.51
NM_001017915.2	3635	CHM1_1.1	NW_004929306.1	1054	63141	+	99.82	76.27
NM_001017915.2	3635	CHM1_1.1	NW_004929305.1	84133995	84204534	+	99.91	22.23
NM_005541.4	3635	CHM1_1.1	NW_004929306.1	1054	63141	+	99.82	76.31
NM_005541.4	3635	CHM1_1.1	NW_004929305.1	84133995	84204534	+	99.91	22.18
NM_012133.5	26958	CHM1_1.1	NW_004929332.1	68710539	68918236	-	98.74	55.47
NM_001290031.1	285141	CHM1_1.1	NW_004929305.1	21837030	21844446	+	99.78	87.73
NM_001290030.1	285141	CHM1_1.1	NW_004929305.1	21837030	21865302	+	99.84	90.77
NM_020979.4	10603	CHM1_1.1	NW_004929332.1	40487534	40523266	+	99.64	88.84
NM_031421.3	83538	CHM1_1.1	NW_004929407.1	14997142	15027957	+	100	91.52
NM_207355.3	102724631	CHM1_1.1	NW_004929394.1	2051929	2083378	-	99.4	94.8
NM_001290095.1	283953	CHM1_1.1	NW_004929400.1	8560041	8560546	-	99.8	62.7
NM_001290097.1	283953	CHM1_1.1	NW_004929400.1	8560041	8562765	-	99.84	71.63
NM_001290098.1	283953	CHM1_1.1	NW_004929400.1	8527986	8528243	-	100	46.15
NM_001290118.1	100652748	CHM1_1.1	NW_004929376.1	2295738	2656043	+	99.84	83.55
NM_001290117.1	100652748	CHM1_1.1	NW_004929376.1	2295738	2656043	+	99.84	78.76
NM_014938.5	22877	CHM1_1.1	NW_004929386.1	31172	51273	+	99.91	93.72
NM_014938.5	22877	CHM1_1.1	NW_004929385.1	13093799	13094337	+	100	6.38
NM_130797.3	1804	CHM1_1.1	NW_004929334.1	58900	313516	+	99.55	78.59
NM_130797.3	1804	CHM1_1.1	NW_004929333.1	14419287	14933785	+	99.51	21.32
NM_001936.4	1804	CHM1_1.1	NW_004929334.1	58900	313516	+	99.55	83.92
NM_001936.4	1804	CHM1_1.1	NW_004929333.1	14672052	14933785	+	100	16.07
NM_001039350.2	1804	CHM1_1.1	NW_004929334.1	58900	313516	+	99.55	78.72
NM_001039350.2	1804	CHM1_1.1	NW_004929333.1	14254043	14933785	+	100	21.27
NM_001290253.1	1804	CHM1_1.1	NW_004929334.1	8723	9708	+	99.79	49
NM_001290253.1	1804	CHM1_1.1	NW_004929333.1	14419287	14933789	+	99.41	49.85
NM_001290252.1	1804	CHM1_1.1	NW_004929334.1	147536	313516	+	99.58	83.43
NM_001290252.1	1804	CHM1_1.1	NW_004929333.1	14672052	14933787	+	99.86	16.61
NM_003868.2	8823	CHM1_1.1	NW_004929444.1	5950	8320	+	99.43	56.89
NM_006865.4	11026	CHM1_1.1	NW_004929415.1	26674417	26691084	-	84.5	62.99
NM_001172654.2	11026	CHM1_1.1	NW_004929415.1	26674417	26691039	-	84.4	69.75
NM_032882.5	84968	CHM1_1.1	NW_004929448.1	3878705	3896589	+	97.39	68.56
NM_001291283.1	646627	CHM1_1.1	NW_004929294.1	42678823	42679278	-	97.4	43.66
NM_001291316.1	284021	CHM1_1.1	NW_004929407.1	37200015	37203208	+	99.84	54.42
NM_018461.4	55844	CHM1_1.1	NW_004929377.1	4981457	5006490	+	99.57	89.49
NM_001291317.1	284021	CHM1_1.1	NW_004929407.1	37200015	37203208	+	99.84	53.73
NM_138322.3	5046	CHM1_1.1	NW_004929399.1	16997912	17104277	-	99.9	96.09
NM_001099289.2	344558	CHM1_1.1	NW_004929304.1	1249	10853	+	99.31	57.24
NM_001099289.2	344558	CHM1_1.1	NW_004929303.1	14419793	14781116	+	100	44.22
NM_033486.2	984	CHM1_1.1	NW_004929288.1	1049261	1069217	-	99.19	91.79
NM_001787.2	984	CHM1_1.1	NW_004929288.1	1049261	1069217	-	99.2	91.89
NM_033489.2	984	CHM1_1.1	NW_004929288.1	1049261	1069217	-	99.2	91.91
NM_001291345.1	984	CHM1_1.1	NW_004929288.1	1049261	1069217	-	99.43	91.84
NM_016458.3	51236	CHM1_1.1	NW_004929340.1	58426019	58477522	+	95.83	25.1
NM_001291529.1	102723631	CHM1_1.1	NW_004929446.1	19139755	19142264	+	98.45	77.61
NM_001291530.1	102723631	CHM1_1.1	NW_004929446.1	19139755	19142264	+	98.45	76.5
NM_001291661.1	201625	CHM1_1.1	NW_004929309.1	57267865	57470169	-	99.92	78.85
NM_001291815.1	256158	CHM1_1.1	NW_004929367.1	366	86761	+	99.87	74.5
NM_001291815.1	256158	CHM1_1.1	NW_004929366.1	62195050	62239032	+	99.57	14.99
NM_020790.1	200958	CHM1_1.1	NW_004929312.1	1294508	1299618	+	98.14	69.94
NM_005960.1	4584	CHM1_1.1	NW_004929332.1	39108715	39172692	+	97.5	22.38
NM_006060.5	10320	CHM1_1.1	NW_004929330.1	33604	62172	+	100	93.2
NM_006060.5	10320	CHM1_1.1	NW_004929329.1	50336556	50359647	+	99.08	6.83
NM_001220765.2	10320	CHM1_1.1	NW_004929330.1	33604	62172	+	100	93.06
NM_001220765.2	10320	CHM1_1.1	NW_004929329.1	50336556	50359643	+	99.76	6.91
NM_001291837.1	10320	CHM1_1.1	NW_004929330.1	33604	62172	+	100	93.47
NM_001291837.1	10320	CHM1_1.1	NW_004929329.1	50340567	50359643	+	100	6.5
NM_001291838.1	10320	CHM1_1.1	NW_004929330.1	39611	62172	+	100	93.33
NM_001291838.1	10320	CHM1_1.1	NW_004929329.1	50340567	50359648	+	99.5	6.7
NM_001220767.2	10320	CHM1_1.1	NW_004929330.1	39610	62172	+	100	96.99
NM_001220768.2	10320	CHM1_1.1	NW_004929330.1	33604	62172	+	100	96.99
NM_001291839.1	10320	CHM1_1.1	NW_004929330.1	39610	62172	+	100	96.39
NM_001220770.2	10320	CHM1_1.1	NW_004929330.1	39610	62172	+	100	96.92
NM_001291840.1	10320	CHM1_1.1	NW_004929330.1	56989	62172	+	100	96.75
NM_001220771.2	10320	CHM1_1.1	NW_004929330.1	33604	62172	+	100	96.9
NM_001291841.1	10320	CHM1_1.1	NW_004929330.1	44415	62172	+	100	96.92
NM_001291842.1	10320	CHM1_1.1	NW_004929330.1	44415	62172	+	100	96.9
NM_001291843.1	10320	CHM1_1.1	NW_004929330.1	48800	62172	+	100	96.83
NM_001291844.1	10320	CHM1_1.1	NW_004929330.1	48800	62172	+	100	96.81
NM_001291845.1	10320	CHM1_1.1	NW_004929329.1	50336556	50359646	+	99.53	22.73
NM_001291845.1	10320	CHM1_1.1	NW_004929330.1	25066	26504	+	99.72	77.07
NM_001291846.1	10320	CHM1_1.1	NW_004929329.1	50336556	50359646	+	99.53	53.47
NM_001291846.1	10320	CHM1_1.1	NW_004929330.1	25066	26899	+	100	46.89
NM_001291847.1	10320	CHM1_1.1	NW_004929329.1	50340567	50359646	+	99.75	51.86
NM_001291847.1	10320	CHM1_1.1	NW_004929330.1	25066	26899	+	100	48.52
NM_001077693.3	641700	CHM1_1.1	NW_004929323.1	47098105	47098725	-	100	43.58
NM_001077693.3	641700	CHM1_1.1	NW_004929324.1	54	5238	-	100	27.68
NM_001293739.1	641700	CHM1_1.1	NW_004929323.1	47098105	47098725	-	100	34.92
NM_001293739.1	641700	CHM1_1.1	NW_004929324.1	54	5238	-	100	31.87
NM_018711.4	55530	CHM1_1.1	NW_004929384.1	71447874	71518427	-	99.81	91.37
NM_001297740.1	6902	CHM1_1.1	NW_004929325.1	2607068	2607261	+	93.87	32.37
NM_001127361.2	127544	CHM1_1.1	NW_004929290.1	3373998	3402337	-	99.92	96.19
NM_001301046.1	147906	CHM1_1.1	NW_004929415.1	19026071	19033169	-	100	96.62
NM_021158.4	57761	CHM1_1.1	NW_004929416.1	301274	301866	+	93.76	23.17
NM_001301201.1	57761	CHM1_1.1	NW_004929416.1	301939	303270	+	99.75	16.65
NM_015201.4	23246	CHM1_1.1	NW_004929340.1	58579320	58581470	-	100	42.56
NM_015201.4	23246	CHM1_1.1	NW_004929341.1	65681	80496	-	99.78	18.91
NM_003631.3	8505	CHM1_1.1	NW_004929376.1	1947929	2286159	-	99.8	60.91
NM_001303486.1	8505	CHM1_1.1	NW_004929376.1	1947929	2286160	-	99.8	67.7
NM_001303487.1	8505	CHM1_1.1	NW_004929376.1	1947929	2283342	-	100	64.45
NM_001303489.1	8505	CHM1_1.1	NW_004929376.1	1948041	2052387	-	100	82.39
NM_004505.3	9098	CHM1_1.1	NW_004929405.1	18018193	18048197	-	95.39	41.23
NM_001304284.1	9098	CHM1_1.1	NW_004929405.1	20017339	20090470	-	89.72	19.66
NM_001304359.1	4586	CHM1_1.1	NW_004929378.1	1090471	1161279	+	99.88	34.02
NM_001305424.1	56776	CHM1_1.1	NW_004929294.1	34032554	34414279	+	99.86	93.72
NM_006236.2	5455	CHM1_1.1	NW_004929303.1	10145495	10149643	+	100	90.25
NM_001308304.1	116988	CHM1_1.1	NW_004929333.1	11453296	11490506	+	100	91.78
NM_001042535.3	116988	CHM1_1.1	NW_004929333.1	11453296	11490506	+	100	92.33
NM_001291281.2	100132074	CHM1_1.1	NW_004929290.1	11800072	11821731	+	99.91	90.23
NM_004476.1	2346	PacBioCHM1_r2_GenBank_08312015	LJII01000019.1	34999947	35059454	-	99.86	85.65
NM_032260.2	84220	PacBioCHM1_r2_GenBank_08312015	LJII01000192.1	1302423	1336803	+	98.58	80.54
NM_139320.1	89832	PacBioCHM1_r2_GenBank_08312015	LJII01000235.1	232286	248056	-	99.68	77.29
NM_139320.1	89832	PacBioCHM1_r2_GenBank_08312015	LJII01002257.1	16081	39392	+	98.66	23.51
NM_182481.1	85318	PacBioCHM1_r2_GenBank_08312015	LJII01000441.1	1991	30773	+	99.57	74.72
NM_182481.1	85318	PacBioCHM1_r2_GenBank_08312015	LJII01001888.1	28117	29496	+	100	17.13
NM_182973.1	360200	PacBioCHM1_r2_GenBank_08312015	LJII01002846.1	862	27895	-	99.94	60.22
NM_182973.1	360200	PacBioCHM1_r2_GenBank_08312015	LJII01000115.1	2998	7237	+	99.82	35.66
NM_001004325.1	440021	PacBioCHM1_r2_GenBank_08312015	LJII01000133.1	1471401	1472488	-	100	97.31
NM_001012709.1	387267	PacBioCHM1_r2_GenBank_08312015	LJII01000133.1	1497526	1498704	-	99.57	86.68
NM_018662.2	27185	PacBioCHM1_r2_GenBank_08312015	LJII01000138.1	4124	168150	-	96.72	28.7
NM_001012957.1	27185	PacBioCHM1_r2_GenBank_08312015	LJII01000138.1	4124	168150	-	96.76	29.34
NM_001012959.1	27185	PacBioCHM1_r2_GenBank_08312015	LJII01000138.1	3885	168150	-	99.42	78.02
NM_001014986.1	2346	PacBioCHM1_r2_GenBank_08312015	LJII01000019.1	34999947	35059454	-	99.86	85.12
NM_013452.2	26609	PacBioCHM1_r2_GenBank_08312015	LJII01000179.1	324099	325857	-	99.4	87.59
NM_005054.2	84220	PacBioCHM1_r2_GenBank_08312015	LJII01000255.1	549939	565394	-	99.4	30.55
NM_000651.4	1378	PacBioCHM1_r2_GenBank_08312015	LJII01000048.1	14846204	14973259	-	99.87	86.53
NM_170606.2	58508	PacBioCHM1_r2_GenBank_08312015	LJII01000098.1	9873	82376	+	99.98	76.71
NM_170606.2	58508	PacBioCHM1_r2_GenBank_08312015	LJII01001200.1	1153	59144	-	99.08	17.42
NM_170606.2	58508	PacBioCHM1_r2_GenBank_08312015	LJII01000271.1	76116	76495	-	100	2.25
NM_020761.2	57521	PacBioCHM1_r2_GenBank_08312015	LJII01000150.1	36279	296719	+	99.85	83.18
NM_020761.2	57521	PacBioCHM1_r2_GenBank_08312015	LJII01000091.1	7179835	7278029	+	99.91	16.83
NM_004607.2	6902	PacBioCHM1_r2_GenBank_08312015	LJII01000003.1	17577702	17577895	-	93.87	28.27
NM_032558.2	84641	PacBioCHM1_r2_GenBank_08312015	LJII01000153.1	2449079	2494812	-	99.55	88.38
NM_032558.2	84641	PacBioCHM1_r2_GenBank_08312015	LJII01001555.1	7901	8277	-	100	11.38
NM_153247.2	222962	PacBioCHM1_r2_GenBank_08312015	LJII01000238.1	2053	11264	+	99.81	75.62
NM_153247.2	222962	PacBioCHM1_r2_GenBank_08312015	LJII01000108.1	5329807	5338691	+	99.85	24.25
NM_001040661.1	222962	PacBioCHM1_r2_GenBank_08312015	LJII01000238.1	2053	11264	+	99.81	75.54
NM_001040661.1	222962	PacBioCHM1_r2_GenBank_08312015	LJII01000108.1	5329807	5338691	+	99.85	24.32
NM_001043352.1	7170	PacBioCHM1_r2_GenBank_08312015	LJII01000002.1	9389819	9406256	+	94.42	53.09
NM_001043353.1	7170	PacBioCHM1_r2_GenBank_08312015	LJII01000002.1	9389819	9406256	+	92.96	52.94
NM_145297.3	199777	PacBioCHM1_r2_GenBank_08312015	LJII01000016.1	34973529	34993705	-	84.96	38.41
NM_005577.2	4018	PacBioCHM1_r2_GenBank_08312015	LJII01000001.1	99353028	99477999	-	99.9	84.52
NM_207328.2	150763	PacBioCHM1_r2_GenBank_08312015	LJII01000819.1	22704	33293	+	97.97	67.11
NM_207328.2	150763	PacBioCHM1_r2_GenBank_08312015	LJII01000197.1	1044988	1047359	+	97.01	33
NM_033655.3	79937	PacBioCHM1_r2_GenBank_08312015	LJII01000506.1	5127	76864	+	99.16	63.87
NM_033655.3	79937	PacBioCHM1_r2_GenBank_08312015	LJII01000236.1	5013	204652	-	98.66	49.76
NM_001037866.1	729540	PacBioCHM1_r2_GenBank_08312015	LJII01000192.1	1302423	1336803	+	98.58	81.05
NM_001025200.3	440387	PacBioCHM1_r2_GenBank_08312015	LJII01000063.1	7485482	7490763	+	97.73	83.7
NM_022892.1	4671	PacBioCHM1_r2_GenBank_08312015	LJII01000531.1	123369	153721	-	99.97	83.55
NM_004536.2	4671	PacBioCHM1_r2_GenBank_08312015	LJII01000531.1	123369	153721	-	99.97	74.99
NM_018491.3	55871	PacBioCHM1_r2_GenBank_08312015	LJII01001380.1	30132	73158	-	98.9	68.89
NM_018491.3	55871	PacBioCHM1_r2_GenBank_08312015	LJII01001725.1	44000	59083	+	98.83	34.42
NM_198455.2	23145	PacBioCHM1_r2_GenBank_08312015	LJII01000443.1	64	51179	+	99.82	87.81
NM_198455.2	23145	PacBioCHM1_r2_GenBank_08312015	LJII01000104.1	307	6602	-	98.76	12.42
NM_001085457.1	644019	PacBioCHM1_r2_GenBank_08312015	LJII01001380.1	30136	73158	-	99.74	68.81
NM_001085457.1	644019	PacBioCHM1_r2_GenBank_08312015	LJII01001725.1	44000	60659	+	99.84	36.88
NM_001097612.1	653519	PacBioCHM1_r2_GenBank_08312015	LJII01000291.1	1813	8948	+	100	44.96
NM_001097612.1	653519	PacBioCHM1_r2_GenBank_08312015	LJII01001338.1	397	39798	-	96.65	57.91
NM_007329.2	1755	PacBioCHM1_r2_GenBank_08312015	LJII01000018.1	35108426	35170677	+	99.93	75.17
NM_017579.2	1755	PacBioCHM1_r2_GenBank_08312015	LJII01000018.1	35108426	35170677	+	99.77	75.66
NM_015321.2	23373	PacBioCHM1_r2_GenBank_08312015	LJII01000116.1	3596203	3635644	-	99.94	97.01
NM_001098482.1	23373	PacBioCHM1_r2_GenBank_08312015	LJII01000116.1	3596203	3635644	-	99.94	97.03
NM_001098612.1	100049587	PacBioCHM1_r2_GenBank_08312015	LJII01000152.1	1121687	1135536	-	95.65	53.19
NM_015189.1	23233	PacBioCHM1_r2_GenBank_08312015	LJII01000021.1	85693	489492	+	99.94	69.31
NM_015189.1	23233	PacBioCHM1_r2_GenBank_08312015	LJII01000054.1	50532	174107	-	99.06	33.07
NM_152563.2	55199	PacBioCHM1_r2_GenBank_08312015	LJII01000643.1	125115	126693	-	99.68	78.59
NM_018172.2	55199	PacBioCHM1_r2_GenBank_08312015	LJII01000643.1	125115	126693	-	99.68	74.79
NM_001099653.1	55199	PacBioCHM1_r2_GenBank_08312015	LJII01000643.1	125115	126693	-	99.68	75.55
NM_001102575.1	112574	PacBioCHM1_r2_GenBank_08312015	LJII01000757.1	56206	57371	+	76.88	21.95
NM_001105549.1	55769	PacBioCHM1_r2_GenBank_08312015	LJII01000152.1	1639762	2125813	-	98.65	57.81
NM_001105550.1	55769	PacBioCHM1_r2_GenBank_08312015	LJII01000152.1	1639762	2125813	-	98.62	56.09
NM_001105551.1	55769	PacBioCHM1_r2_GenBank_08312015	LJII01000152.1	1639762	2125813	-	98.64	56.49
NM_001105552.1	55769	PacBioCHM1_r2_GenBank_08312015	LJII01000152.1	1639762	2125813	-	98.53	54.52
NM_005339.4	3093	PacBioCHM1_r2_GenBank_08312015	LJII01000076.1	13758	21717	+	99.97	88.9
NM_001111112.1	3093	PacBioCHM1_r2_GenBank_08312015	LJII01000076.1	13758	21717	+	99.97	88.62
NM_001111113.1	3093	PacBioCHM1_r2_GenBank_08312015	LJII01000076.1	12113	21717	+	99.97	89.82
NM_152636.2	196074	PacBioCHM1_r2_GenBank_08312015	LJII01000032.1	21555786	21560359	-	90.68	90.05
NM_002097.2	2971	PacBioCHM1_r2_GenBank_08312015	LJII01000039.1	1	8547	+	99.89	66.8
NM_002097.2	2971	PacBioCHM1_r2_GenBank_08312015	LJII01000086.1	7999810	8002458	+	99.59	35.32
NM_001113738.1	51326	PacBioCHM1_r2_GenBank_08312015	LJII01000093.1	6955094	6962768	+	97.7	92.18
NM_016632.2	51326	PacBioCHM1_r2_GenBank_08312015	LJII01000093.1	7009619	7010152	+	99.55	53.41
NM_178558.4	340252	PacBioCHM1_r2_GenBank_08312015	LJII01000010.1	14441542	14441865	+	83.33	10.16
NM_001130022.1	340252	PacBioCHM1_r2_GenBank_08312015	LJII01000032.1	20460171	20460572	+	85.43	17.08
NM_015202.2	23247	PacBioCHM1_r2_GenBank_08312015	LJII01000248.1	1175	31963	+	99.97	60.06
NM_015202.2	23247	PacBioCHM1_r2_GenBank_08312015	LJII01000107.1	8535	199553	-	100	39.86
NM_004061.3	1010	PacBioCHM1_r2_GenBank_08312015	LJII01000254.1	91266	204527	+	98.79	64.18
NM_004061.3	1010	PacBioCHM1_r2_GenBank_08312015	LJII01000050.1	868	879431	-	99.81	37.33
NM_152547.4	153579	PacBioCHM1_r2_GenBank_08312015	LJII01000370.1	4355	18035	+	99.52	90.34
NM_152547.4	153579	PacBioCHM1_r2_GenBank_08312015	LJII01000140.1	1591	6964	-	100	9.65
NM_007101.3	1757	PacBioCHM1_r2_GenBank_08312015	LJII01000128.1	3788360	3857662	+	99.78	82.25
NM_007101.3	1757	PacBioCHM1_r2_GenBank_08312015	LJII01000020.1	36667611	36668066	-	100	13.49
NM_001134707.1	1757	PacBioCHM1_r2_GenBank_08312015	LJII01000128.1	3789958	3857662	+	99.77	81.5
NM_001134707.1	1757	PacBioCHM1_r2_GenBank_08312015	LJII01000020.1	36667611	36668066	-	100	14.16
NM_022780.3	64795	PacBioCHM1_r2_GenBank_08312015	LJII01000564.1	79194	116304	-	100	91.62
NM_022780.3	64795	PacBioCHM1_r2_GenBank_08312015	LJII01000054.1	14048313	14048832	+	100	8.38
NM_001009944.2	5310	PacBioCHM1_r2_GenBank_08312015	LJII01000057.1	12600889	12634214	+	99.97	58.74
NM_001009944.2	5310	PacBioCHM1_r2_GenBank_08312015	LJII01000189.1	966	16912	+	99.88	41.92
NM_000296.3	5310	PacBioCHM1_r2_GenBank_08312015	LJII01000057.1	12600889	12634214	+	99.97	58.76
NM_000296.3	5310	PacBioCHM1_r2_GenBank_08312015	LJII01000189.1	966	16912	+	99.88	41.91
NM_001135865.1	100132247	PacBioCHM1_r2_GenBank_08312015	LJII01003589.1	4812	9273	-	100	78.41
NM_001135865.1	100132247	PacBioCHM1_r2_GenBank_08312015	LJII01000062.1	11604050	11624150	-	95.36	30.12
NM_001136213.1	23784	PacBioCHM1_r2_GenBank_08312015	LJII01000418.1	21559	53126	+	99.58	94.55
NM_152609.2	163882	PacBioCHM1_r2_GenBank_08312015	LJII01000157.1	2282559	2320328	-	99.83	81.92
NM_152609.2	163882	PacBioCHM1_r2_GenBank_08312015	LJII01000130.1	3500444	3526467	+	99.34	14.67
NM_001139459.1	163882	PacBioCHM1_r2_GenBank_08312015	LJII01000157.1	2303030	2320328	-	99.52	57.87
NM_001139459.1	163882	PacBioCHM1_r2_GenBank_08312015	LJII01000130.1	3500444	3555147	+	95.97	42.07
NM_014972.2	22980	PacBioCHM1_r2_GenBank_08312015	LJII01000215.1	220	33975	-	99.57	82.93
NM_014972.2	22980	PacBioCHM1_r2_GenBank_08312015	LJII01000392.1	227171	229334	-	99.74	17.3
NM_146421.2	2944	PacBioCHM1_r2_GenBank_08312015	LJII01000065.1	10324686	10360575	-	96.31	95.9
NM_001144931.1	391322	PacBioCHM1_r2_GenBank_08312015	LJII01000037.1	2545993	2570924	+	93.12	72.82
NM_001144952.1	54549	PacBioCHM1_r2_GenBank_08312015	LJII01000087.1	7778002	7830200	-	99.85	59.04
NM_001144952.1	54549	PacBioCHM1_r2_GenBank_08312015	LJII01000091.1	926	260282	-	99.89	42.31
NM_001293.2	1207	PacBioCHM1_r2_GenBank_08312015	LJII01000126.1	1885812	1903980	+	90.12	52.68
NM_001145355.1	55871	PacBioCHM1_r2_GenBank_08312015	LJII01001380.1	30132	73158	-	98.9	65.18
NM_001145355.1	55871	PacBioCHM1_r2_GenBank_08312015	LJII01001725.1	44000	59083	+	98.42	37.92
NM_001145356.1	55871	PacBioCHM1_r2_GenBank_08312015	LJII01001380.1	30132	73158	-	98.84	67.82
NM_001145356.1	55871	PacBioCHM1_r2_GenBank_08312015	LJII01001725.1	44000	59083	+	98.83	35.59
NM_001143831.2	2915	PacBioCHM1_r2_GenBank_08312015	LJII01000083.1	7941003	8286610	-	99.92	89.12
NM_001143831.2	2915	PacBioCHM1_r2_GenBank_08312015	LJII01000019.1	35650682	35863436	+	98.46	14.05
NM_172003.3	150472	PacBioCHM1_r2_GenBank_08312015	LJII01001038.1	44641	78437	-	100	58.78
NM_172003.3	150472	PacBioCHM1_r2_GenBank_08312015	LJII01001369.1	17048	61585	+	100	54.4
NM_001160116.1	123207	PacBioCHM1_r2_GenBank_08312015	LJII01000001.1	105421091	105447893	+	97.68	29.52
NM_001160116.1	123207	PacBioCHM1_r2_GenBank_08312015	LJII01000033.1	20978123	20978508	+	87.08	62.35
NM_001161357.1	23149	PacBioCHM1_r2_GenBank_08312015	LJII01000080.1	8988287	9027176	+	99.81	85.4
NM_001161357.1	23149	PacBioCHM1_r2_GenBank_08312015	LJII01000116.1	4591889	4593920	-	95.5	17.45
NM_015122.2	23149	PacBioCHM1_r2_GenBank_08312015	LJII01000080.1	8992045	9027176	+	99.85	85.79
NM_015122.2	23149	PacBioCHM1_r2_GenBank_08312015	LJII01000116.1	4591889	4593920	-	95.39	17.07
NM_001161358.1	23149	PacBioCHM1_r2_GenBank_08312015	LJII01000080.1	8988287	9027176	+	99.85	85.37
NM_001161358.1	23149	PacBioCHM1_r2_GenBank_08312015	LJII01000116.1	4591889	4593920	-	95.39	17.59
NM_001161359.1	23149	PacBioCHM1_r2_GenBank_08312015	LJII01000080.1	8992045	9027176	+	99.88	85.03
NM_001161359.1	23149	PacBioCHM1_r2_GenBank_08312015	LJII01000116.1	4591889	4593920	-	95.39	17.99
NM_001163034.1	57521	PacBioCHM1_r2_GenBank_08312015	LJII01000150.1	36279	296719	+	99.88	81.93
NM_001163034.1	57521	PacBioCHM1_r2_GenBank_08312015	LJII01000091.1	7179835	7278029	+	99.91	18.08
NM_181453.3	9648	PacBioCHM1_r2_GenBank_08312015	LJII01000246.1	4215	55334	-	99.83	71.2
NM_181453.3	9648	PacBioCHM1_r2_GenBank_08312015	LJII01000192.1	83	19676	+	99.1	39.67
NM_003007.3	6406	PacBioCHM1_r2_GenBank_08312015	LJII01000024.1	15817907	15820503	-	99.93	89.17
NM_001163809.1	124997	PacBioCHM1_r2_GenBank_08312015	LJII01000357.1	268509	281512	-	99.81	88.76
NM_001164537.1	27185	PacBioCHM1_r2_GenBank_08312015	LJII01000138.1	4124	168150	-	96.86	29.65
NM_001164538.1	27185	PacBioCHM1_r2_GenBank_08312015	LJII01000138.1	2730	168150	-	98.67	59.64
NM_001164539.1	27185	PacBioCHM1_r2_GenBank_08312015	LJII01000138.1	15081	168150	-	97.81	73.24
NM_001164540.1	27185	PacBioCHM1_r2_GenBank_08312015	LJII01000138.1	21225	168150	-	95.24	25.36
NM_001164541.1	27185	PacBioCHM1_r2_GenBank_08312015	LJII01000138.1	2730	168150	-	98.41	61.65
NM_001164542.1	27185	PacBioCHM1_r2_GenBank_08312015	LJII01000138.1	23869	168150	-	100	62.25
NM_001164544.1	27185	PacBioCHM1_r2_GenBank_08312015	LJII01000138.1	23869	168150	-	100	61.1
NM_001164545.1	27185	PacBioCHM1_r2_GenBank_08312015	LJII01000138.1	23869	168150	-	100	63.46
NM_001123363.3	729540	PacBioCHM1_r2_GenBank_08312015	LJII01000255.1	549920	565394	-	99.41	28.9
NM_006569.5	10669	PacBioCHM1_r2_GenBank_08312015	LJII01000009.1	17379837	17398349	-	99.78	97.35
NM_001166239.1	10669	PacBioCHM1_r2_GenBank_08312015	LJII01000009.1	17379837	17398127	-	99.76	97.13
NM_022126.3	64077	PacBioCHM1_r2_GenBank_08312015	LJII01000124.1	3872702	3970921	-	100	57.74
NM_022126.3	64077	PacBioCHM1_r2_GenBank_08312015	LJII01000018.1	36993923	37038693	+	98.07	45.5
NM_001170714.1	9564	PacBioCHM1_r2_GenBank_08312015	LJII01000523.1	131431	132064	-	96.84	17.88
NM_001170715.1	9564	PacBioCHM1_r2_GenBank_08312015	LJII01000523.1	131431	132095	-	94.36	20.25
NM_001170716.1	9564	PacBioCHM1_r2_GenBank_08312015	LJII01000523.1	131431	150043	-	96.07	20.62
NM_001170717.1	9564	PacBioCHM1_r2_GenBank_08312015	LJII01000523.1	131431	132215	-	97.07	23.64
NM_001170718.1	9564	PacBioCHM1_r2_GenBank_08312015	LJII01000523.1	131431	132196	-	89.31	22.54
NM_014567.3	9564	PacBioCHM1_r2_GenBank_08312015	LJII01000523.1	131431	132215	-	97.07	24.04
NM_001170719.1	9564	PacBioCHM1_r2_GenBank_08312015	LJII01000523.1	131431	132062	-	96.99	18.68
NM_001001671.3	389840	PacBioCHM1_r2_GenBank_08312015	LJII01000068.1	11198856	11303021	-	99.97	88.66
NM_001001671.3	389840	PacBioCHM1_r2_GenBank_08312015	LJII01000030.1	7874	36656	-	99.81	11.39
NM_172213.3	926	PacBioCHM1_r2_GenBank_08312015	LJII01000376.1	9109	26114	-	100	63.49
NM_172101.3	926	PacBioCHM1_r2_GenBank_08312015	LJII01000376.1	9110	26114	-	100	60.35
NM_172102.3	926	PacBioCHM1_r2_GenBank_08312015	LJII01000376.1	9109	26114	-	100	60.14
NM_001178100.1	926	PacBioCHM1_r2_GenBank_08312015	LJII01000376.1	17186	26114	-	100	58.58
NM_006987.3	9501	PacBioCHM1_r2_GenBank_08312015	LJII01000413.1	19048	96142	+	100	74.87
NM_006987.3	9501	PacBioCHM1_r2_GenBank_08312015	LJII01000250.1	555370	589801	+	95.81	27.19
NM_001190411.1	9501	PacBioCHM1_r2_GenBank_08312015	LJII01000413.1	19048	96142	+	100	79.98
NM_001190411.1	9501	PacBioCHM1_r2_GenBank_08312015	LJII01000250.1	555370	589801	+	94.56	22.22
NM_001190412.1	9501	PacBioCHM1_r2_GenBank_08312015	LJII01000413.1	35873	96142	+	98.62	79.07
NM_001190412.1	9501	PacBioCHM1_r2_GenBank_08312015	LJII01000250.1	555370	589775	+	97.03	27.22
NM_001190413.1	9501	PacBioCHM1_r2_GenBank_08312015	LJII01000413.1	35873	96142	+	99.12	82.65
NM_001190413.1	9501	PacBioCHM1_r2_GenBank_08312015	LJII01000250.1	555370	589775	+	96.11	22.07
NM_139173.3	150159	PacBioCHM1_r2_GenBank_08312015	LJII01000090.1	7330186	7443375	+	99.85	71.15
NM_139173.3	150159	PacBioCHM1_r2_GenBank_08312015	LJII01001002.1	2904	8573	+	97.86	34.69
NM_001100874.2	150159	PacBioCHM1_r2_GenBank_08312015	LJII01000090.1	7330186	7443375	+	99.85	76.18
NM_001100874.2	150159	PacBioCHM1_r2_GenBank_08312015	LJII01000011.1	19087	19369	+	100	16.12
NM_003429.4	7639	PacBioCHM1_r2_GenBank_08312015	LJII01000010.1	14420914	14441868	+	82.83	14.62
NM_198544.3	100526739	PacBioCHM1_r2_GenBank_08312015	LJII01000034.1	6111675	6112028	+	78.57	25.49
NM_001097613.2	653519	PacBioCHM1_r2_GenBank_08312015	LJII01000291.1	1813	8948	+	100	43.93
NM_001097613.2	653519	PacBioCHM1_r2_GenBank_08312015	LJII01001338.1	397	39798	-	96.77	58.86
NM_001195563.1	23261	PacBioCHM1_r2_GenBank_08312015	LJII01000007.1	69025178	69025666	-	81.92	65.67
NM_152666.2	200150	PacBioCHM1_r2_GenBank_08312015	LJII01000021.1	24897702	25166927	+	99.65	87.47
NM_001198542.1	54768	PacBioCHM1_r2_GenBank_08312015	LJII01000324.1	268189	330575	-	99.3	54.25
NM_001198542.1	54768	PacBioCHM1_r2_GenBank_08312015	LJII01000063.1	11476130	11626969	+	100	58.85
NM_001198543.1	54768	PacBioCHM1_r2_GenBank_08312015	LJII01000324.1	268189	330575	-	99.3	54.77
NM_001198543.1	54768	PacBioCHM1_r2_GenBank_08312015	LJII01000063.1	11476130	11626969	+	100	58.45
NM_001199011.1	84516	PacBioCHM1_r2_GenBank_08312015	LJII01000015.1	6825989	6826185	+	92.38	28.18
NM_001199417.1	57636	PacBioCHM1_r2_GenBank_08312015	LJII01000323.1	326	72479	-	99.88	58.54
NM_001199417.1	57636	PacBioCHM1_r2_GenBank_08312015	LJII01000283.1	3182	25474	+	100	49.28
NM_001204199.1	6728	PacBioCHM1_r2_GenBank_08312015	LJII01000068.1	7615270	7663454	+	94.99	70.76
NM_022463.4	64359	PacBioCHM1_r2_GenBank_08312015	LJII01000250.1	120013	145637	+	99.69	85.51
NM_001220488.1	1012	PacBioCHM1_r2_GenBank_08312015	LJII01000099.1	5218320	6157939	-	99.86	89.14
NM_001220491.1	1012	PacBioCHM1_r2_GenBank_08312015	LJII01000099.1	5834776	6157944	-	99.33	64.17
NM_001220492.1	1012	PacBioCHM1_r2_GenBank_08312015	LJII01000099.1	5834776	6157944	-	99.38	65.92
NM_001242672.1	100287898	PacBioCHM1_r2_GenBank_08312015	LJII01000171.1	1589962	1594162	-	99.9	57.4
NM_001242672.1	100287898	PacBioCHM1_r2_GenBank_08312015	LJII01000134.1	16442	56142	-	98.18	46.25
NM_022662.3	64682	PacBioCHM1_r2_GenBank_08312015	LJII01000300.1	329751	371269	-	99.82	50.32
NM_022662.3	64682	PacBioCHM1_r2_GenBank_08312015	LJII01000255.1	300	65612	-	99.91	46.04
NM_001253792.1	55311	PacBioCHM1_r2_GenBank_08312015	LJII01000155.1	1264	3662	+	99.92	66.71
NM_001253792.1	55311	PacBioCHM1_r2_GenBank_08312015	LJII01000137.1	8656	14712	-	98.99	33.62
NM_018337.3	55311	PacBioCHM1_r2_GenBank_08312015	LJII01000155.1	1264	3662	+	99.92	66.76
NM_018337.3	55311	PacBioCHM1_r2_GenBank_08312015	LJII01000137.1	8656	14712	-	98.99	33.31
NM_001256171.1	7639	PacBioCHM1_r2_GenBank_08312015	LJII01000032.1	20460174	20480104	+	85.27	17.98
NM_001256172.1	7639	PacBioCHM1_r2_GenBank_08312015	LJII01000032.1	20460174	20460558	+	85.82	23.67
NM_001092.4	29	PacBioCHM1_r2_GenBank_08312015	LJII01000636.1	56382	129979	-	99.85	83.9
NM_001092.4	29	PacBioCHM1_r2_GenBank_08312015	LJII01000242.1	620149	656655	+	100	16.07
NM_001159746.2	29	PacBioCHM1_r2_GenBank_08312015	LJII01000636.1	56382	129979	-	99.85	75.8
NM_001159746.2	29	PacBioCHM1_r2_GenBank_08312015	LJII01000242.1	541740	656655	+	99.92	24.17
NM_021988.5	7335	PacBioCHM1_r2_GenBank_08312015	LJII01000035.1	22667455	22669269	+	94.11	71.31
NM_199144.2	7335	PacBioCHM1_r2_GenBank_08312015	LJII01000035.1	22667455	22669269	+	94.11	73.53
NM_001257393.1	7335	PacBioCHM1_r2_GenBank_08312015	LJII01000035.1	22667455	22669269	+	94.11	77.66
NM_016284.4	23019	PacBioCHM1_r2_GenBank_08312015	LJII01000078.1	9045042	9110474	-	99.92	88.52
NM_206999.2	23019	PacBioCHM1_r2_GenBank_08312015	LJII01000078.1	9068255	9110474	-	99.85	81.36
NM_001265612.1	23019	PacBioCHM1_r2_GenBank_08312015	LJII01000078.1	9045042	9110474	-	99.91	88.5
NM_001040135.2	57180	PacBioCHM1_r2_GenBank_08312015	LJII01000271.1	397922	463288	+	99.9	53.89
NM_020445.5	57180	PacBioCHM1_r2_GenBank_08312015	LJII01000271.1	397922	463288	+	99.9	48.8
NM_017558.4	54768	PacBioCHM1_r2_GenBank_08312015	LJII01000324.1	263888	330575	-	99.41	59.35
NM_017558.4	54768	PacBioCHM1_r2_GenBank_08312015	LJII01000063.1	11476130	11626969	+	100	51.72
NM_001270974.1	54768	PacBioCHM1_r2_GenBank_08312015	LJII01000324.1	47147	330575	-	99.34	84.78
NM_001270974.1	54768	PacBioCHM1_r2_GenBank_08312015	LJII01000063.1	11476130	11626969	+	100	12.21
NM_001271015.1	55284	PacBioCHM1_r2_GenBank_08312015	LJII01000042.1	12946421	12946745	+	94.76	34.17
NM_018264.3	55253	PacBioCHM1_r2_GenBank_08312015	LJII01000103.1	5469219	5614059	-	99.22	53.68
NM_018264.3	55253	PacBioCHM1_r2_GenBank_08312015	LJII01000322.1	10493	124955	-	97.69	51.6
NM_001039703.5	100132406	PacBioCHM1_r2_GenBank_08312015	LJII01000691.1	28	65435	+	95.69	78.71
NM_001039703.5	100132406	PacBioCHM1_r2_GenBank_08312015	LJII01000510.1	101797	146762	-	96.32	23.25
NM_017940.4	55672	PacBioCHM1_r2_GenBank_08312015	LJII01001919.1	10599	41508	-	98.19	77.88
NM_001277945.1	55769	PacBioCHM1_r2_GenBank_08312015	LJII01000152.1	1639762	2177901	-	98.69	58.56
NM_001277946.1	55769	PacBioCHM1_r2_GenBank_08312015	LJII01000152.1	1639762	2177901	-	98.51	55.38
NM_001277947.1	55769	PacBioCHM1_r2_GenBank_08312015	LJII01000152.1	1639762	2177901	-	98.65	57.79
NM_001277948.1	55769	PacBioCHM1_r2_GenBank_08312015	LJII01000152.1	1639762	2177901	-	98.65	56.74
NM_001277949.1	55769	PacBioCHM1_r2_GenBank_08312015	LJII01000152.1	1639762	2177901	-	98.63	57.32
NM_001277951.1	55769	PacBioCHM1_r2_GenBank_08312015	LJII01000152.1	1639762	2125813	-	98.38	53.23
NM_001277952.1	55769	PacBioCHM1_r2_GenBank_08312015	LJII01000152.1	1639762	2125813	-	98.63	56.4
NM_001278141.1	149013	PacBioCHM1_r2_GenBank_08312015	LJII01000660.1	5555	58387	-	96.23	89.09
NM_001278189.1	7170	PacBioCHM1_r2_GenBank_08312015	LJII01000002.1	9389819	9406256	+	94.42	73.23
NM_001278267.1	100288142	PacBioCHM1_r2_GenBank_08312015	LJII01000691.1	30	67061	+	95.82	61.12
NM_015383.2	25832	PacBioCHM1_r2_GenBank_08312015	LJII01000842.1	425	59970	+	98.97	83.88
NM_005560.4	3911	PacBioCHM1_r2_GenBank_08312015	LJII01000226.1	428	51896	-	99.75	60.62
NM_005560.4	3911	PacBioCHM1_r2_GenBank_08312015	LJII01000191.1	572	6848	+	99.21	31.03
NM_018078.3	55132	PacBioCHM1_r2_GenBank_08312015	LJII01000053.1	940467	941639	-	75.62	28.07
NM_178043.2	55132	PacBioCHM1_r2_GenBank_08312015	LJII01000053.1	940467	941639	-	75.62	59.36
NM_001198832.2	9659	PacBioCHM1_r2_GenBank_08312015	LJII01001382.1	9509	73787	+	100	63.44
NM_001198832.2	9659	PacBioCHM1_r2_GenBank_08312015	LJII01001681.1	55023	63601	-	98.79	24.46
NM_001198832.2	9659	PacBioCHM1_r2_GenBank_08312015	LJII01000373.1	79485	173168	+	96.96	13.98
NM_001198834.3	9659	PacBioCHM1_r2_GenBank_08312015	LJII01001382.1	9509	73787	+	100	68.27
NM_001198834.3	9659	PacBioCHM1_r2_GenBank_08312015	LJII01001681.1	55023	63601	-	98.81	23.26
NM_001198834.3	9659	PacBioCHM1_r2_GenBank_08312015	LJII01000373.1	124091	173168	+	96.21	10.29
NM_014644.5	9659	PacBioCHM1_r2_GenBank_08312015	LJII01001382.1	9509	73787	+	100	67.82
NM_014644.5	9659	PacBioCHM1_r2_GenBank_08312015	LJII01001681.1	55023	63601	-	98.79	23.77
NM_014644.5	9659	PacBioCHM1_r2_GenBank_08312015	LJII01000373.1	124091	173168	+	96.21	10.22
NM_001002812.2	9659	PacBioCHM1_r2_GenBank_08312015	LJII01001382.1	9509	42738	+	100	80.59
NM_001002812.2	9659	PacBioCHM1_r2_GenBank_08312015	LJII01000373.1	124091	173168	+	96.21	17.71
NM_024318.3	79168	PacBioCHM1_r2_GenBank_08312015	LJII01000137.1	1962861	1965694	+	97.57	90.6
NM_021962.4	29	PacBioCHM1_r2_GenBank_08312015	LJII01000636.1	56382	129979	-	99.85	78.82
NM_021962.4	29	PacBioCHM1_r2_GenBank_08312015	LJII01000242.1	549088	656655	+	99.91	21.14
NM_001282149.1	29	PacBioCHM1_r2_GenBank_08312015	LJII01000636.1	56382	129979	-	99.85	88.96
NM_001282149.1	29	PacBioCHM1_r2_GenBank_08312015	LJII01000242.1	650123	656655	+	100	11.02
NM_001282506.1	200958	PacBioCHM1_r2_GenBank_08312015	LJII01000328.1	38960	51126	+	99.56	80.2
NM_001282524.1	728741	PacBioCHM1_r2_GenBank_08312015	LJII01000607.1	96931	117304	+	99.69	94.23
NM_001256809.2	2914	PacBioCHM1_r2_GenBank_08312015	LJII01000092.1	7056270	7153291	-	99.33	94.38
NM_001282855.1	154865	PacBioCHM1_r2_GenBank_08312015	LJII01000002.1	37048092	37048665	-	99.12	16.33
NM_001284305.1	25771	PacBioCHM1_r2_GenBank_08312015	LJII01000125.1	3653641	3938708	-	99.38	74.93
NM_001284305.1	25771	PacBioCHM1_r2_GenBank_08312015	LJII01000037.1	25403317	25510241	+	99.17	24.93
NM_001284303.1	25771	PacBioCHM1_r2_GenBank_08312015	LJII01000125.1	3653641	3939773	-	99.15	82.23
NM_001284303.1	25771	PacBioCHM1_r2_GenBank_08312015	LJII01000037.1	25391710	25510241	+	98.93	18.41
NM_001284304.1	25771	PacBioCHM1_r2_GenBank_08312015	LJII01000125.1	3653641	3938708	-	99.38	73.79
NM_001284304.1	25771	PacBioCHM1_r2_GenBank_08312015	LJII01000037.1	25391710	25510241	+	99.22	26.08
NM_014346.3	25771	PacBioCHM1_r2_GenBank_08312015	LJII01000125.1	3653641	3938708	-	99.38	76.45
NM_014346.3	25771	PacBioCHM1_r2_GenBank_08312015	LJII01000037.1	25391710	25510241	+	99.1	23.41
NM_001286835.1	220869	PacBioCHM1_r2_GenBank_08312015	LJII01001236.1	537	33660	-	99.55	69.87
NM_001286835.1	220869	PacBioCHM1_r2_GenBank_08312015	LJII01002567.1	14944	17513	-	96.95	29.18
NM_001024916.3	220869	PacBioCHM1_r2_GenBank_08312015	LJII01001236.1	187	33660	-	98.86	48.68
NM_001024916.3	220869	PacBioCHM1_r2_GenBank_08312015	LJII01002567.1	14944	17363	-	98.89	49.93
NM_001026383.2	79741	PacBioCHM1_r2_GenBank_08312015	LJII01000099.1	2085870	2102477	+	92.58	24.18
NM_145023.5	79741	PacBioCHM1_r2_GenBank_08312015	LJII01000099.1	2102052	2102477	+	93.42	19.48
NM_001288813.1	51326	PacBioCHM1_r2_GenBank_08312015	LJII01000093.1	6998015	6999788	+	99.15	81.65
NM_001288812.1	51326	PacBioCHM1_r2_GenBank_08312015	LJII01000093.1	7009619	7018186	+	99.71	47.2
NM_001288811.1	51326	PacBioCHM1_r2_GenBank_08312015	LJII01000093.1	6989668	6999788	+	99.08	82.41
NM_001014812.2	84191	PacBioCHM1_r2_GenBank_08312015	LJII01000118.1	4104124	4121237	-	88.67	83.58
NM_001289953.1	388561	PacBioCHM1_r2_GenBank_08312015	LJII01000070.1	7454048	7556049	-	86.69	88.19
NM_130797.3	1804	PacBioCHM1_r2_GenBank_08312015	LJII01000098.1	2673949	3146425	+	99.26	87.88
NM_130797.3	1804	PacBioCHM1_r2_GenBank_08312015	LJII01000596.1	25422	26079	+	98.33	13.59
NM_001290253.1	1804	PacBioCHM1_r2_GenBank_08312015	LJII01000098.1	2673949	2841160	+	99.02	71.02
NM_001290253.1	1804	PacBioCHM1_r2_GenBank_08312015	LJII01000596.1	25422	26079	+	98.33	31.65
NM_006865.4	11026	PacBioCHM1_r2_GenBank_08312015	LJII01000137.1	1873178	1889849	+	84.5	62.99
NM_001172654.2	11026	PacBioCHM1_r2_GenBank_08312015	LJII01000137.1	1873223	1889849	+	84.4	69.75
NM_017848.5	54954	PacBioCHM1_r2_GenBank_08312015	LJII01000200.1	1118459	1166858	-	99.69	73.31
NM_017848.5	54954	PacBioCHM1_r2_GenBank_08312015	LJII01000119.1	7485	58060	-	99.95	26.61
NM_001201380.2	728577	PacBioCHM1_r2_GenBank_08312015	LJII01000506.1	5127	77847	+	99.58	67.72
NM_001201380.2	728577	PacBioCHM1_r2_GenBank_08312015	LJII01000236.1	5012	204832	-	98.42	43.48
NM_000947.4	5558	PacBioCHM1_r2_GenBank_08312015	LJII01000040.1	23216820	23421153	+	99.88	37.38
NM_000947.4	5558	PacBioCHM1_r2_GenBank_08312015	LJII01000307.1	90496	231001	-	97.71	65.84
NM_152286.4	375775	PacBioCHM1_r2_GenBank_08312015	LJII01000128.1	651	43142	+	99.83	62.91
NM_152286.4	375775	PacBioCHM1_r2_GenBank_08312015	LJII01000239.1	624645	670487	+	100	37.05
NM_001098537.2	375775	PacBioCHM1_r2_GenBank_08312015	LJII01000128.1	651	43142	+	99.83	61.93
NM_001098537.2	375775	PacBioCHM1_r2_GenBank_08312015	LJII01000239.1	624645	670487	+	100	38.02
NM_001291821.1	445571	PacBioCHM1_r2_GenBank_08312015	LJII01001380.1	30113	71559	-	99.73	68.91
NM_001291821.1	445571	PacBioCHM1_r2_GenBank_08312015	LJII01001725.1	44019	50994	+	100	31.26
NM_201453.3	445571	PacBioCHM1_r2_GenBank_08312015	LJII01001380.1	30113	73158	-	99.75	69.99
NM_201453.3	445571	PacBioCHM1_r2_GenBank_08312015	LJII01001725.1	44019	59083	+	100	33.66
NM_001145440.2	441250	PacBioCHM1_r2_GenBank_08312015	LJII01000103.1	15842	136262	+	99.87	51.69
NM_001145440.2	441250	PacBioCHM1_r2_GenBank_08312015	LJII01000322.1	10493	124940	-	99.54	48.24
NM_000842.4	2915	PacBioCHM1_r2_GenBank_08312015	LJII01000083.1	7941003	8286610	-	99.92	86.77
NM_000842.4	2915	PacBioCHM1_r2_GenBank_08312015	LJII01000019.1	35635561	35863436	+	98.7	16.36
NM_001297740.1	6902	PacBioCHM1_r2_GenBank_08312015	LJII01000003.1	17577702	17577895	-	93.87	32.37
NM_001300788.1	54954	PacBioCHM1_r2_GenBank_08312015	LJII01000200.1	1118380	1166858	-	99.67	71.93
NM_001300788.1	54954	PacBioCHM1_r2_GenBank_08312015	LJII01000119.1	7485	58083	-	99.95	27.96
NM_001300847.1	222962	PacBioCHM1_r2_GenBank_08312015	LJII01000238.1	2057	11264	+	99.81	76.59
NM_001300847.1	222962	PacBioCHM1_r2_GenBank_08312015	LJII01000108.1	5329807	5338691	+	100	23.31
NM_015326.4	23380	PacBioCHM1_r2_GenBank_08312015	LJII01000048.1	16005873	16086306	-	99.98	85.75
NM_015326.4	23380	PacBioCHM1_r2_GenBank_08312015	LJII01001218.1	22190	22842	+	96.34	9.51
NM_001170637.3	23380	PacBioCHM1_r2_GenBank_08312015	LJII01000048.1	16005873	16086306	-	99.98	85.74
NM_001170637.3	23380	PacBioCHM1_r2_GenBank_08312015	LJII01001218.1	22190	22842	+	96.34	9.51
NM_001300952.1	23380	PacBioCHM1_r2_GenBank_08312015	LJII01000048.1	16014154	16086306	-	100	80.37
NM_001300952.1	23380	PacBioCHM1_r2_GenBank_08312015	LJII01001218.1	22190	22842	+	96.34	13.11
NM_021158.4	57761	PacBioCHM1_r2_GenBank_08312015	LJII01000035.1	25576353	25603606	-	91.38	27.05
NM_001301201.1	57761	PacBioCHM1_r2_GenBank_08312015	LJII01000035.1	25601610	25602941	-	99.75	16.65
NM_000820.3	2621	PacBioCHM1_r2_GenBank_08312015	LJII01000266.1	1	31203	-	100	35.67
NM_000820.3	2621	PacBioCHM1_r2_GenBank_08312015	LJII01000055.1	2830	5833	+	100	34.51
NM_001302371.1	100132406	PacBioCHM1_r2_GenBank_08312015	LJII01000691.1	28	65435	+	95.26	81.33
NM_001302371.1	100132406	PacBioCHM1_r2_GenBank_08312015	LJII01000510.1	125084	146762	-	96.75	21.69
NM_001304359.1	4586	PacBioCHM1_r2_GenBank_08312015	LJII01000133.1	1025661	1069143	+	99.83	93.58
NM_001304815.1	23152	PacBioCHM1_r2_GenBank_08312015	LJII01000135.1	7154	8885	-	84.64	20.92
NM_015125.4	23152	PacBioCHM1_r2_GenBank_08312015	LJII01000135.1	631713	633549	-	84.61	33.33
NM_001306068.1	100288687	PacBioCHM1_r2_GenBank_08312015	LJII01000062.1	77969	78912	-	96.89	31.92
NM_001306135.1	220107	PacBioCHM1_r2_GenBank_08312015	LJII01000156.1	47561	47942	-	99.21	27.92
NM_001308245.1	153579	PacBioCHM1_r2_GenBank_08312015	LJII01000370.1	4355	13676	+	99.68	78.96
NM_001308245.1	153579	PacBioCHM1_r2_GenBank_08312015	LJII01000140.1	1591	6964	-	100	20.65
NM_002847.4	5799	PacBioCHM1_r2_GenBank_08312015	LJII01000098.1	5799159	6401871	-	99.84	78.4
NM_002847.4	5799	PacBioCHM1_r2_GenBank_08312015	LJII01000275.1	27013	448681	+	99.52	21.54
NM_130842.3	5799	PacBioCHM1_r2_GenBank_08312015	LJII01000098.1	5799159	6401871	-	99.84	79.23
NM_130842.3	5799	PacBioCHM1_r2_GenBank_08312015	LJII01000275.1	27013	448681	+	99.49	20.71
NM_130843.3	5799	PacBioCHM1_r2_GenBank_08312015	LJII01000098.1	5799159	6401871	-	99.83	78
NM_130843.3	5799	PacBioCHM1_r2_GenBank_08312015	LJII01000275.1	27013	448681	+	99.52	21.94
NM_001308267.1	5799	PacBioCHM1_r2_GenBank_08312015	LJII01000098.1	5799159	6401871	-	99.84	80.29
NM_001308267.1	5799	PacBioCHM1_r2_GenBank_08312015	LJII01000275.1	27013	448681	+	99.46	19.66
NM_001308268.1	5799	PacBioCHM1_r2_GenBank_08312015	LJII01000098.1	5799159	6401871	-	99.84	76.72
NM_001308268.1	5799	PacBioCHM1_r2_GenBank_08312015	LJII01000275.1	73126	448681	+	99.56	23.22
NM_001310154.1	400986	PacBioCHM1_r2_GenBank_08312015	LJII01000197.1	1076843	1221274	+	98.41	93.97
NM_001271870.2	647135	PacBioCHM1_r2_GenBank_08312015	LJII01000015.1	44681690	44780363	+	99.64	96.32
NM_001311200.1	1207	PacBioCHM1_r2_GenBank_08312015	LJII01000126.1	1885812	1903980	+	89.81	58.22
NM_001311201.1	1207	PacBioCHM1_r2_GenBank_08312015	LJII01000126.1	1903340	1903980	+	88.9	52.32
NM_001311202.1	1207	PacBioCHM1_r2_GenBank_08312015	LJII01000126.1	1903256	1903980	+	90.09	61.13
NM_001312646.1	3093	PacBioCHM1_r2_GenBank_08312015	LJII01000076.1	12113	21717	+	99.58	91.24
NM_001312647.1	3093	PacBioCHM1_r2_GenBank_08312015	LJII01000076.1	16607	21717	+	99.97	88.46
NM_001312648.1	3093	PacBioCHM1_r2_GenBank_08312015	LJII01000076.1	12113	21717	+	99.97	88.79
NM_198076.5	116228	PacBioCHM1_r2_GenBank_08312015	LJII01000002.1	8987934	9003172	-	83.33	13.18
NM_004476.1	2346	CA P6 CHM1 Conservative 2.5%	LKHW01003470.1	116866	176305	-	98.53	85.57
NM_012313.1	3808	CA P6 CHM1 Conservative 2.5%	LKHW01002771.1	596426	685950	-	96.03	92.63
NM_014246.1	9620	CA P6 CHM1 Conservative 2.5%	LKHW01001825.1	5939	109565	+	99.94	68.97
NM_014246.1	9620	CA P6 CHM1 Conservative 2.5%	LKHW01003846.1	88317	106478	+	99.85	31.22
NM_017416.1	26280	CA P6 CHM1 Conservative 2.5%	LKHW01000914.1	1535535	2236877	+	100	48.67
NM_017416.1	26280	CA P6 CHM1 Conservative 2.5%	LKHW01001102.1	39117	322874	-	99.8	51.52
NM_018034.2	55100	CA P6 CHM1 Conservative 2.5%	LKHW01002963.1	8178285	8233313	-	100	45.8
NM_018034.2	55100	CA P6 CHM1 Conservative 2.5%	LKHW01002964.1	62557	317745	-	98.34	56.43
NM_004195.2	8784	CA P6 CHM1 Conservative 2.5%	LKHW01004381.1	10	1353	-	99.77	37.23
NM_148901.1	8784	CA P6 CHM1 Conservative 2.5%	LKHW01004381.1	10	1353	-	99.77	45.06
NM_148902.1	8784	CA P6 CHM1 Conservative 2.5%	LKHW01004381.1	10	1353	-	99.77	37.88
NM_031886.2	3743	CA P6 CHM1 Conservative 2.5%	LKHW01002332.1	1	2224	-	98.98	24.54
NM_021015.3	6758	CA P6 CHM1 Conservative 2.5%	LKHW01003487.1	38731319	38732422	-	84.23	77.98
NM_177998.1	133060	CA P6 CHM1 Conservative 2.5%	LKHW01004286.1	160	9461	+	99.81	59.39
NM_177998.1	133060	CA P6 CHM1 Conservative 2.5%	LKHW01000541.1	3222408	3222843	+	99.31	23.22
NM_175064.2	285955	CA P6 CHM1 Conservative 2.5%	LKHW01004474.1	370	8052	+	98.1	91.05
NM_182481.1	85318	CA P6 CHM1 Conservative 2.5%	LKHW01004031.1	41499	70272	-	99.43	74.72
NM_182481.1	85318	CA P6 CHM1 Conservative 2.5%	LKHW01002044.1	11470	45216	+	97.88	25.01
NM_182973.1	360200	CA P6 CHM1 Conservative 2.5%	LKHW01003615.1	1	4228	+	100	35.28
NM_182973.1	360200	CA P6 CHM1 Conservative 2.5%	LKHW01003519.1	336578	357206	+	99.82	36.35
NM_005481.2	10025	CA P6 CHM1 Conservative 2.5%	LKHW01003741.1	154127	178275	+	100	76.25
NM_005481.2	10025	CA P6 CHM1 Conservative 2.5%	LKHW01003533.1	349321	349616	-	99.32	10.12
NM_207336.1	168544	CA P6 CHM1 Conservative 2.5%	LKHW01000026.1	5419113	5420412	-	100	57.01
NM_004422.2	1856	CA P6 CHM1 Conservative 2.5%	LKHW01004211.1	68637	69234	-	100	19.82
NM_033547.3	92105	CA P6 CHM1 Conservative 2.5%	LKHW01003217.1	2494084	2576491	-	99.58	83.96
NM_001004325.1	440021	CA P6 CHM1 Conservative 2.5%	LKHW01001592.1	1773592	1774679	+	100	97.31
NM_004434.2	2009	CA P6 CHM1 Conservative 2.5%	LKHW01000728.1	4365009	4371042	-	99.95	55.74
NM_004434.2	2009	CA P6 CHM1 Conservative 2.5%	LKHW01001255.1	1559	129087	-	99.49	44.54
NM_001008707.1	2009	CA P6 CHM1 Conservative 2.5%	LKHW01000728.1	4365009	4371042	-	99.95	55.04
NM_001008707.1	2009	CA P6 CHM1 Conservative 2.5%	LKHW01001255.1	1559	129087	-	99.51	45.23
NM_001012709.1	387267	CA P6 CHM1 Conservative 2.5%	LKHW01001592.1	1747376	1748554	+	99.57	86.68
NM_001014986.1	2346	CA P6 CHM1 Conservative 2.5%	LKHW01003470.1	116866	176305	-	98.61	85.05
NM_013452.2	26609	CA P6 CHM1 Conservative 2.5%	LKHW01001976.1	317659	319418	-	99.4	87.59
NM_003307.3	7226	CA P6 CHM1 Conservative 2.5%	LKHW01002335.1	1085091	1138888	+	99.9	52.24
NM_003307.3	7226	CA P6 CHM1 Conservative 2.5%	LKHW01002492.1	327	1716	+	99.92	23.65
NM_003307.3	7226	CA P6 CHM1 Conservative 2.5%	LKHW01004364.1	4451	30835	+	99.42	20.72
NM_021965.3	5239	CA P6 CHM1 Conservative 2.5%	LKHW01002732.1	1069	153859	+	99.71	85.14
NM_021965.3	5239	CA P6 CHM1 Conservative 2.5%	LKHW01004824.1	942	21972	-	98.62	19.42
NM_003271.4	7106	CA P6 CHM1 Conservative 2.5%	LKHW01003243.1	6880	11450	+	99.82	80.8
NM_003271.4	7106	CA P6 CHM1 Conservative 2.5%	LKHW01003238.1	441708	449289	+	99.63	19.24
NM_001025234.1	7106	CA P6 CHM1 Conservative 2.5%	LKHW01003243.1	5030	11450	+	99.31	81.76
NM_001025234.1	7106	CA P6 CHM1 Conservative 2.5%	LKHW01003238.1	443003	449289	+	99.65	20.02
NM_001025235.1	7106	CA P6 CHM1 Conservative 2.5%	LKHW01003243.1	6880	11450	+	99.82	80.07
NM_001025235.1	7106	CA P6 CHM1 Conservative 2.5%	LKHW01003238.1	441825	449289	+	99.65	19.97
NM_001025236.1	7106	CA P6 CHM1 Conservative 2.5%	LKHW01003243.1	6880	11450	+	99.82	79.79
NM_001025236.1	7106	CA P6 CHM1 Conservative 2.5%	LKHW01003238.1	441825	449289	+	99.65	20.24
NM_001025237.1	7106	CA P6 CHM1 Conservative 2.5%	LKHW01003243.1	6880	11450	+	99.82	78.04
NM_001025237.1	7106	CA P6 CHM1 Conservative 2.5%	LKHW01003238.1	443368	449289	+	99.69	21.97
NM_001025238.1	7106	CA P6 CHM1 Conservative 2.5%	LKHW01003243.1	6880	11450	+	99.82	86.96
NM_001024855.1	10168	CA P6 CHM1 Conservative 2.5%	LKHW01003496.1	30725447	30748770	-	99.79	97.8
NM_152486.2	148398	CA P6 CHM1 Conservative 2.5%	LKHW01004368.1	2023	7611	+	99.08	81.55
NM_144672.3	146183	CA P6 CHM1 Conservative 2.5%	LKHW01004598.1	1	73573	-	100	79.74
NM_000651.4	1378	CA P6 CHM1 Conservative 2.5%	LKHW01003262.1	14879155	15006210	-	99.88	86.54
NM_170606.2	58508	CA P6 CHM1 Conservative 2.5%	LKHW01001419.1	12898	85401	+	99.98	76.71
NM_170606.2	58508	CA P6 CHM1 Conservative 2.5%	LKHW01000219.1	1704140	1918147	+	99.89	22.01
NM_001003795.2	389524	CA P6 CHM1 Conservative 2.5%	LKHW01004722.1	1517186	1543817	-	99.66	83.96
NM_001003795.2	389524	CA P6 CHM1 Conservative 2.5%	LKHW01004745.1	17265	48011	+	99.21	21
NM_020761.2	57521	CA P6 CHM1 Conservative 2.5%	LKHW01000720.1	26234	286673	-	99.85	83.18
NM_020761.2	57521	CA P6 CHM1 Conservative 2.5%	LKHW01001133.1	33261	131461	-	99.91	16.83
NM_004607.2	6902	CA P6 CHM1 Conservative 2.5%	LKHW01000350.1	1803924	1804117	-	93.87	28.27
NM_013427.2	395	CA P6 CHM1 Conservative 2.5%	LKHW01001708.1	307460	424696	+	99.86	71.49
NM_013427.2	395	CA P6 CHM1 Conservative 2.5%	LKHW01001095.1	3691341	3692802	+	99.93	28.56
NM_006125.2	395	CA P6 CHM1 Conservative 2.5%	LKHW01001708.1	307460	418840	+	100	59.82
NM_006125.2	395	CA P6 CHM1 Conservative 2.5%	LKHW01001095.1	3691341	3692802	+	99.93	40.25
NM_153247.2	222962	CA P6 CHM1 Conservative 2.5%	LKHW01001121.1	135241	145281	-	95.56	73.13
NM_001040661.1	222962	CA P6 CHM1 Conservative 2.5%	LKHW01001121.1	135241	145281	-	95.56	73.05
NM_198253.2	7015	CA P6 CHM1 Conservative 2.5%	LKHW01001697.1	26288	29104	-	99.96	70.1
NM_005539.3	3632	CA P6 CHM1 Conservative 2.5%	LKHW01004585.1	912452	918269	-	100	58.47
NM_005539.3	3632	CA P6 CHM1 Conservative 2.5%	LKHW01002937.1	23497	237443	-	100	39.17
NM_004278.3	9487	CA P6 CHM1 Conservative 2.5%	LKHW01000539.1	380201	479737	+	100	48.06
NM_004278.3	9487	CA P6 CHM1 Conservative 2.5%	LKHW01001979.1	4175	4638	+	99.56	40.27
NM_030582.3	80781	CA P6 CHM1 Conservative 2.5%	LKHW01002171.1	6405	16127	+	99.96	44.99
NM_030582.3	80781	CA P6 CHM1 Conservative 2.5%	LKHW01003974.1	845	23021	-	99.93	26.51
NM_001702.2	575	CA P6 CHM1 Conservative 2.5%	LKHW01003048.1	2472	50389	-	99.53	54.63
NM_001702.2	575	CA P6 CHM1 Conservative 2.5%	LKHW01003602.1	230775	257844	-	99.92	45.74
NM_001043352.1	7170	CA P6 CHM1 Conservative 2.5%	LKHW01000004.1	1261721	1278158	+	94.42	53.09
NM_001043353.1	7170	CA P6 CHM1 Conservative 2.5%	LKHW01000004.1	1261721	1278158	+	92.96	52.94
NM_015417.4	25876	CA P6 CHM1 Conservative 2.5%	LKHW01003207.1	22223252	22223528	+	100	17.34
NM_022773.2	64788	CA P6 CHM1 Conservative 2.5%	LKHW01003686.1	14421	122052	+	100	92.44
NM_145297.3	199777	CA P6 CHM1 Conservative 2.5%	LKHW01003451.1	35006678	35026855	-	84.96	38.41
NM_006034.3	9537	CA P6 CHM1 Conservative 2.5%	LKHW01003668.1	3210969	3216253	-	99.29	84.62
NM_006034.3	9537	CA P6 CHM1 Conservative 2.5%	LKHW01002770.1	714576	714951	+	98.68	10.68
NM_001089.2	21	CA P6 CHM1 Conservative 2.5%	LKHW01001698.1	231099	274532	+	99.96	44.94
NM_001089.2	21	CA P6 CHM1 Conservative 2.5%	LKHW01002342.1	1775	18144	+	100	52.84
NM_001025200.3	440387	CA P6 CHM1 Conservative 2.5%	LKHW01000024.1	4088082	4093363	-	97.73	83.7
NM_001080437.1	25992	CA P6 CHM1 Conservative 2.5%	LKHW01003044.1	24233	88174	+	99.98	96.86
NM_001080461.1	340260	CA P6 CHM1 Conservative 2.5%	LKHW01004254.1	1236	1917	-	100	28.32
NM_033513.2	91978	CA P6 CHM1 Conservative 2.5%	LKHW01003541.1	2377	2730	-	99.43	31.21
NM_001080556.1	146845	CA P6 CHM1 Conservative 2.5%	LKHW01000348.1	9552	45409	-	100	44.43
NM_001080556.1	146845	CA P6 CHM1 Conservative 2.5%	LKHW01000351.1	1532703	1543283	-	99.68	48.21
NM_145054.4	146845	CA P6 CHM1 Conservative 2.5%	LKHW01000348.1	9552	45409	-	100	49.56
NM_145054.4	146845	CA P6 CHM1 Conservative 2.5%	LKHW01000351.1	1532703	1543283	-	99.68	43.73
NM_014272.3	11173	CA P6 CHM1 Conservative 2.5%	LKHW01000362.1	10402	46485	-	94.28	90.74
NM_198455.2	23145	CA P6 CHM1 Conservative 2.5%	LKHW01000442.1	28	51143	+	99.82	87.81
NM_014219.2	3803	CA P6 CHM1 Conservative 2.5%	LKHW01002771.1	660233	685950	-	98.72	93.69
NM_007329.2	1755	CA P6 CHM1 Conservative 2.5%	LKHW01001418.1	441831	504082	+	99.93	75.17
NM_017579.2	1755	CA P6 CHM1 Conservative 2.5%	LKHW01001418.1	441831	504082	+	99.77	75.66
NM_019054.2	54537	CA P6 CHM1 Conservative 2.5%	LKHW01002411.1	14470	50317	+	99.57	68.07
NM_019054.2	54537	CA P6 CHM1 Conservative 2.5%	LKHW01000354.1	2478	13839	+	99.32	38.95
NM_015321.2	23373	CA P6 CHM1 Conservative 2.5%	LKHW01001967.1	564439	603882	+	99.94	97.01
NM_001098482.1	23373	CA P6 CHM1 Conservative 2.5%	LKHW01001967.1	564439	603882	+	99.94	97.03
NM_014853.2	9905	CA P6 CHM1 Conservative 2.5%	LKHW01003568.1	349604	365776	-	99.75	76.16
NM_014853.2	9905	CA P6 CHM1 Conservative 2.5%	LKHW01003550.1	13364	20453	-	99.1	6.8
NM_001098509.1	9905	CA P6 CHM1 Conservative 2.5%	LKHW01003568.1	349604	365776	-	99.74	75.51
NM_001098509.1	9905	CA P6 CHM1 Conservative 2.5%	LKHW01003550.1	13364	20451	-	99.09	6.91
NM_001098612.1	100049587	CA P6 CHM1 Conservative 2.5%	LKHW01001705.1	1116148	1129996	-	95.65	53.19
NM_019112.3	10347	CA P6 CHM1 Conservative 2.5%	LKHW01003581.1	212326	227321	-	99.85	59.18
NM_019112.3	10347	CA P6 CHM1 Conservative 2.5%	LKHW01003741.1	196	7736	-	99.88	36.59
NM_007037.4	11095	CA P6 CHM1 Conservative 2.5%	LKHW01004316.1	38923	52975	+	99.56	50.25
NM_007037.4	11095	CA P6 CHM1 Conservative 2.5%	LKHW01000199.1	3030687	3031895	-	99.83	33
NM_182482.2	85319	CA P6 CHM1 Conservative 2.5%	LKHW01002144.1	20619	58093	+	99.55	83.02
NM_182482.2	85319	CA P6 CHM1 Conservative 2.5%	LKHW01000092.1	5657	31086	-	94.67	21.25
NM_020892.2	113878	CA P6 CHM1 Conservative 2.5%	LKHW01002759.1	549170	570630	+	99.72	51.64
NM_001102594.1	113878	CA P6 CHM1 Conservative 2.5%	LKHW01002759.1	549170	570630	+	99.77	49.5
NM_001102595.1	113878	CA P6 CHM1 Conservative 2.5%	LKHW01002759.1	549170	570630	+	99.74	46.23
NM_001102596.1	113878	CA P6 CHM1 Conservative 2.5%	LKHW01002759.1	568001	570630	+	99.66	42.46
NM_001102575.1	112574	CA P6 CHM1 Conservative 2.5%	LKHW01003844.1	54447	55612	-	76.88	21.95
NM_014520.3	10514	CA P6 CHM1 Conservative 2.5%	LKHW01003241.1	400012	405673	-	99.94	42.38
NM_001105538.1	10514	CA P6 CHM1 Conservative 2.5%	LKHW01003241.1	400012	405673	-	100	35.88
NM_001105549.1	55769	CA P6 CHM1 Conservative 2.5%	LKHW01001713.1	74551	100482	-	99.82	97.14
NM_001105550.1	55769	CA P6 CHM1 Conservative 2.5%	LKHW01001713.1	74551	100482	-	99.85	97.02
NM_001105551.1	55769	CA P6 CHM1 Conservative 2.5%	LKHW01001713.1	74551	100482	-	99.85	97.05
NM_001105552.1	55769	CA P6 CHM1 Conservative 2.5%	LKHW01001713.1	74551	100482	-	99.84	96.92
NM_173464.3	91133	CA P6 CHM1 Conservative 2.5%	LKHW01000778.1	5950823	6134331	-	100	63.84
NM_173464.3	91133	CA P6 CHM1 Conservative 2.5%	LKHW01000779.1	11789	278833	-	99.11	37.65
NM_015225.2	158471	CA P6 CHM1 Conservative 2.5%	LKHW01003851.1	5425	259395	-	99.46	68.99
NM_199131.2	11023	CA P6 CHM1 Conservative 2.5%	LKHW01003663.1	1	8132	+	99.9	89.05
NM_001112704.1	11023	CA P6 CHM1 Conservative 2.5%	LKHW01003663.1	1	3365	+	99.93	75.1
NM_006852.3	11011	CA P6 CHM1 Conservative 2.5%	LKHW01002352.1	848	63938	+	99.87	85.2
NM_152636.2	196074	CA P6 CHM1 Conservative 2.5%	LKHW01000009.1	11337568	11342141	-	90.68	90.05
NM_001113738.1	51326	CA P6 CHM1 Conservative 2.5%	LKHW01000352.1	235267	242944	+	97.68	92.18
NM_000827.3	2890	CA P6 CHM1 Conservative 2.5%	LKHW01000350.1	6365955	6415360	-	100	61.86
NM_000827.3	2890	CA P6 CHM1 Conservative 2.5%	LKHW01004240.1	434091	659912	+	99.24	39.29
NM_001114183.1	2890	CA P6 CHM1 Conservative 2.5%	LKHW01000350.1	6365955	6415360	-	100	61.86
NM_001114183.1	2890	CA P6 CHM1 Conservative 2.5%	LKHW01004240.1	434091	659912	+	99.12	39.65
NM_014009.3	50943	CA P6 CHM1 Conservative 2.5%	LKHW01004087.1	97445	98773	-	99.82	48.23
NM_014009.3	50943	CA P6 CHM1 Conservative 2.5%	LKHW01000144.1	29	9122	-	99.67	38.79
NM_001114377.1	50943	CA P6 CHM1 Conservative 2.5%	LKHW01004087.1	97445	98773	-	99.82	50.46
NM_001114377.1	50943	CA P6 CHM1 Conservative 2.5%	LKHW01000144.1	29	9122	-	99.63	35.99
NM_005018.2	5133	CA P6 CHM1 Conservative 2.5%	LKHW01004358.1	5048	8153	+	99.89	93.46
NM_139058.2	170302	CA P6 CHM1 Conservative 2.5%	LKHW01001104.1	337	9174	-	100	57.53
NM_000292.2	5256	CA P6 CHM1 Conservative 2.5%	LKHW01003572.1	143221	226917	+	99.97	65.48
NM_000292.2	5256	CA P6 CHM1 Conservative 2.5%	LKHW01003240.1	636	3534	+	99.69	30.38
NM_001122636.1	50614	CA P6 CHM1 Conservative 2.5%	LKHW01002932.1	35143	42473	+	99.93	55.2
NM_001122636.1	50614	CA P6 CHM1 Conservative 2.5%	LKHW01004339.1	13001	17985	+	100	20.18
NM_001122636.1	50614	CA P6 CHM1 Conservative 2.5%	LKHW01004090.1	49716	90795	+	99.81	20.07
NM_020777.2	57537	CA P6 CHM1 Conservative 2.5%	LKHW01001978.1	1219525	1460584	-	99.64	92
NM_020777.2	57537	CA P6 CHM1 Conservative 2.5%	LKHW01000541.1	46003	249383	-	99.64	9.17
NM_000342.3	6521	CA P6 CHM1 Conservative 2.5%	LKHW01004624.1	945729	955045	-	99.88	68.96
NM_153007.4	146852	CA P6 CHM1 Conservative 2.5%	LKHW01003535.1	405618	406282	+	97.16	57.78
NM_000186.3	3075	CA P6 CHM1 Conservative 2.5%	LKHW01003865.1	10939	33600	-	97.3	36.9
NM_001280.2	1153	CA P6 CHM1 Conservative 2.5%	LKHW01003581.1	1	2119	-	100	29.99
NM_001311.4	1396	CA P6 CHM1 Conservative 2.5%	LKHW01004200.1	251	875	+	100	68.12
NM_024591.4	79643	CA P6 CHM1 Conservative 2.5%	LKHW01003549.1	304915	307694	-	99.37	67
NM_004413.3	1800	CA P6 CHM1 Conservative 2.5%	LKHW01003552.1	1686	4209	+	99.92	77.24
NM_031220.3	83394	CA P6 CHM1 Conservative 2.5%	LKHW01003544.1	1697	54393	+	99.92	94.72
NM_017891.4	54991	CA P6 CHM1 Conservative 2.5%	LKHW01004010.1	78285	107500	+	100	35.01
NM_001129778.1	400581	CA P6 CHM1 Conservative 2.5%	LKHW01000127.1	56203	56719	-	100	53.46
NM_001129778.1	400581	CA P6 CHM1 Conservative 2.5%	LKHW01000126.1	10611	21727	-	100	46.53
NM_153346.4	139105	CA P6 CHM1 Conservative 2.5%	LKHW01003226.1	394144	445136	-	99.85	91.64
NM_030629.2	80790	CA P6 CHM1 Conservative 2.5%	LKHW01000917.1	1254	21635	+	99.93	70.1
NM_030629.2	80790	CA P6 CHM1 Conservative 2.5%	LKHW01000024.1	10383755	10566921	+	100	29.9
NM_198390.2	80790	CA P6 CHM1 Conservative 2.5%	LKHW01000917.1	1254	21635	+	99.93	66.46
NM_198390.2	80790	CA P6 CHM1 Conservative 2.5%	LKHW01000024.1	10333578	10566921	+	100	33.53
NM_178558.4	340252	CA P6 CHM1 Conservative 2.5%	LKHW01001804.1	14955401	14955724	+	83.33	10.16
NM_001130022.1	340252	CA P6 CHM1 Conservative 2.5%	LKHW01000009.1	10242100	10242501	+	85.43	17.08
NM_001130045.1	254173	CA P6 CHM1 Conservative 2.5%	LKHW01004010.1	10013	21221	-	99.8	68.92
NM_031213.3	81926	CA P6 CHM1 Conservative 2.5%	LKHW01001714.1	60824	64546	-	99.05	86.57
NM_178314.3	353116	CA P6 CHM1 Conservative 2.5%	LKHW01000009.1	75839465	75867696	-	99.94	73.55
NM_178314.3	353116	CA P6 CHM1 Conservative 2.5%	LKHW01000208.1	8119481	8132990	+	98.63	27.78
NM_004061.3	1010	CA P6 CHM1 Conservative 2.5%	LKHW01000488.1	234642	347907	-	98.79	64.18
NM_004061.3	1010	CA P6 CHM1 Conservative 2.5%	LKHW01004231.1	6587638	7466215	+	99.81	37.33
NM_152547.4	153579	CA P6 CHM1 Conservative 2.5%	LKHW01000063.1	5364	19044	+	99.52	90.34
NM_032350.5	84310	CA P6 CHM1 Conservative 2.5%	LKHW01002345.1	29548	58035	+	99.03	87.78
NM_001134395.1	84310	CA P6 CHM1 Conservative 2.5%	LKHW01002345.1	29548	58035	+	99.03	88.46
NM_001134396.1	84310	CA P6 CHM1 Conservative 2.5%	LKHW01002345.1	29548	58035	+	99.03	89.79
NM_007101.3	1757	CA P6 CHM1 Conservative 2.5%	LKHW01000921.1	3631201	3700503	+	99.78	82.25
NM_007101.3	1757	CA P6 CHM1 Conservative 2.5%	LKHW01003476.1	20608237	20608692	-	100	13.49
NM_001134707.1	1757	CA P6 CHM1 Conservative 2.5%	LKHW01000921.1	3632799	3700503	+	99.77	81.5
NM_001134707.1	1757	CA P6 CHM1 Conservative 2.5%	LKHW01003476.1	20608237	20608692	-	100	14.16
NM_022780.3	64795	CA P6 CHM1 Conservative 2.5%	LKHW01003858.1	77516	114629	-	99.98	91.62
NM_022780.3	64795	CA P6 CHM1 Conservative 2.5%	LKHW01002965.1	12294425	12315202	+	99.69	10.64
NM_021805.2	59307	CA P6 CHM1 Conservative 2.5%	LKHW01003238.1	220	11678	-	100	66.68
NM_001135053.1	59307	CA P6 CHM1 Conservative 2.5%	LKHW01003238.1	220	11678	-	100	67.29
NM_001135054.1	59307	CA P6 CHM1 Conservative 2.5%	LKHW01003238.1	220	9297	-	100	68.65
NM_130444.2	80781	CA P6 CHM1 Conservative 2.5%	LKHW01002171.1	6405	16127	+	99.96	40.18
NM_130444.2	80781	CA P6 CHM1 Conservative 2.5%	LKHW01003974.1	845	23021	-	99.95	34.34
NM_001135865.1	100132247	CA P6 CHM1 Conservative 2.5%	LKHW01004597.1	98122	121479	-	99.8	80.48
NM_001136213.1	23784	CA P6 CHM1 Conservative 2.5%	LKHW01001307.1	30376	61943	-	99.74	94.5
NM_001139498.1	2258	CA P6 CHM1 Conservative 2.5%	LKHW01003530.1	135024	135988	-	100	14.54
NM_001139498.1	2258	CA P6 CHM1 Conservative 2.5%	LKHW01002163.1	944532	1021886	-	100	85.26
NM_001139500.1	2258	CA P6 CHM1 Conservative 2.5%	LKHW01003530.1	135022	135988	-	99.68	13.58
NM_001139500.1	2258	CA P6 CHM1 Conservative 2.5%	LKHW01002163.1	944532	1170630	-	100	86.33
NM_014972.2	22980	CA P6 CHM1 Conservative 2.5%	LKHW01003552.1	239569	273330	+	99.47	83.02
NM_146421.2	2944	CA P6 CHM1 Conservative 2.5%	LKHW01000019.1	2528946	2564840	-	96.31	95.9
NM_001142805.1	6535	CA P6 CHM1 Conservative 2.5%	LKHW01003628.1	2	6173	+	99.79	84.1
NM_005629.3	6535	CA P6 CHM1 Conservative 2.5%	LKHW01003628.1	2	6173	+	99.8	84.23
NM_005207.3	1399	CA P6 CHM1 Conservative 2.5%	LKHW01000130.1	5379	25358	+	100	84.6
NM_031918.3	83855	CA P6 CHM1 Conservative 2.5%	LKHW01003807.1	151867	154230	-	99.95	81.88
NM_003156.3	6786	CA P6 CHM1 Conservative 2.5%	LKHW01003862.1	22638	91991	+	99.93	79.29
NM_003156.3	6786	CA P6 CHM1 Conservative 2.5%	LKHW01002487.1	59157	171092	-	100	20.63
NM_001144931.1	391322	CA P6 CHM1 Conservative 2.5%	LKHW01003847.1	13893112	14156254	-	95.23	74.6
NM_001293.2	1207	CA P6 CHM1 Conservative 2.5%	LKHW01000590.1	2033662	2051832	-	90.12	52.68
NM_001145029.1	374860	CA P6 CHM1 Conservative 2.5%	LKHW01004789.1	235	92321	-	98.75	63.8
NM_001145029.1	374860	CA P6 CHM1 Conservative 2.5%	LKHW01004788.1	16307	40742	-	99.8	44.46
NM_001145176.1	729956	CA P6 CHM1 Conservative 2.5%	LKHW01002771.1	1083	13107	+	99.98	88.86
NM_020717.3	57477	CA P6 CHM1 Conservative 2.5%	LKHW01000146.1	983917	1030594	-	99.83	96.92
NM_001001852.3	415116	CA P6 CHM1 Conservative 2.5%	LKHW01002157.1	1	2345	-	99.91	50.91
NM_001146685.1	643965	CA P6 CHM1 Conservative 2.5%	LKHW01004030.1	136105	136363	+	99.61	52.64
NM_001146685.1	643965	CA P6 CHM1 Conservative 2.5%	LKHW01003232.1	514487	514721	-	100	47.76
NM_033103.4	85415	CA P6 CHM1 Conservative 2.5%	LKHW01001404.1	1603	19210	+	99.86	63.46
NM_033103.4	85415	CA P6 CHM1 Conservative 2.5%	LKHW01000460.1	32504	61114	+	95.24	30.68
NM_032129.2	84069	CA P6 CHM1 Conservative 2.5%	LKHW01004368.1	29459	36619	+	99.39	61.89
NM_001160184.1	84069	CA P6 CHM1 Conservative 2.5%	LKHW01004368.1	29459	36619	+	99.35	60.15
NM_001160116.1	123207	CA P6 CHM1 Conservative 2.5%	LKHW01000027.1	894150	920953	-	97.68	29.52
NM_001160116.1	123207	CA P6 CHM1 Conservative 2.5%	LKHW01001683.1	20949804	20950189	+	87.08	62.35
NM_000109.3	1756	CA P6 CHM1 Conservative 2.5%	LKHW01000911.1	3761	1431488	+	99.84	82.52
NM_000109.3	1756	CA P6 CHM1 Conservative 2.5%	LKHW01000210.1	9848	773830	-	100	15.16
NM_004006.2	1756	CA P6 CHM1 Conservative 2.5%	LKHW01000911.1	3761	1431488	+	99.84	82.97
NM_004006.2	1756	CA P6 CHM1 Conservative 2.5%	LKHW01000210.1	9848	645781	-	100	14.7
NM_004009.3	1756	CA P6 CHM1 Conservative 2.5%	LKHW01000911.1	3761	1431488	+	99.84	82.92
NM_004009.3	1756	CA P6 CHM1 Conservative 2.5%	LKHW01000210.1	9848	562775	-	100	14.75
NM_004010.3	1756	CA P6 CHM1 Conservative 2.5%	LKHW01000911.1	3761	1431488	+	99.84	82.43
NM_004010.3	1756	CA P6 CHM1 Conservative 2.5%	LKHW01000210.1	9848	562774	-	100	15.25
NM_001161334.1	440689	CA P6 CHM1 Conservative 2.5%	LKHW01001422.1	53897	54468	-	99.47	57.25
NM_001161334.1	440689	CA P6 CHM1 Conservative 2.5%	LKHW01000190.1	14227	14660	-	98.16	43.44
NM_170664.2	146183	CA P6 CHM1 Conservative 2.5%	LKHW01004598.1	1	47122	-	100	72.99
NM_001161683.1	146183	CA P6 CHM1 Conservative 2.5%	LKHW01004598.1	1	67658	-	100	78.9
NM_001163034.1	57521	CA P6 CHM1 Conservative 2.5%	LKHW01000720.1	26234	286673	-	99.88	81.93
NM_001163034.1	57521	CA P6 CHM1 Conservative 2.5%	LKHW01001133.1	33261	131461	-	99.91	18.08
NM_003007.3	6406	CA P6 CHM1 Conservative 2.5%	LKHW01003859.1	7777095	7779691	+	99.93	89.17
NM_005817.4	10226	CA P6 CHM1 Conservative 2.5%	LKHW01004424.1	4017	13568	+	99.86	65.34
NM_001164189.1	10226	CA P6 CHM1 Conservative 2.5%	LKHW01004424.1	4017	13568	+	99.86	65.29
NM_001164194.1	10226	CA P6 CHM1 Conservative 2.5%	LKHW01004424.1	4017	13568	+	99.86	66.36
NM_021070.4	4054	CA P6 CHM1 Conservative 2.5%	LKHW01000031.1	2133390	2149195	-	99.94	86.49
NM_021070.4	4054	CA P6 CHM1 Conservative 2.5%	LKHW01001586.1	2175498	2176106	+	99.34	13.29
NM_001130144.2	4054	CA P6 CHM1 Conservative 2.5%	LKHW01000031.1	2133390	2149195	-	99.95	86.89
NM_001130144.2	4054	CA P6 CHM1 Conservative 2.5%	LKHW01001586.1	2175498	2176106	+	99.34	12.89
NM_001164315.1	375248	CA P6 CHM1 Conservative 2.5%	LKHW01001018.1	27607	157763	+	95.9	73.88
NM_001164315.1	375248	CA P6 CHM1 Conservative 2.5%	LKHW01000803.1	37823	63224	-	93.23	32.33
NM_001164458.1	653857	CA P6 CHM1 Conservative 2.5%	LKHW01002480.1	26706	69082	-	99.88	68.46
NM_001164459.1	653857	CA P6 CHM1 Conservative 2.5%	LKHW01002480.1	26706	69082	-	99.88	71.94
NM_001005291.2	6720	CA P6 CHM1 Conservative 2.5%	LKHW01004535.1	10	2379	+	99.43	35.29
NM_001005291.2	6720	CA P6 CHM1 Conservative 2.5%	LKHW01002474.1	576649	595399	+	100	29.26
NM_004176.4	6720	CA P6 CHM1 Conservative 2.5%	LKHW01004535.1	10	2379	+	99.43	35.93
NM_004176.4	6720	CA P6 CHM1 Conservative 2.5%	LKHW01002474.1	576649	595399	+	100	27.97
NM_006569.5	10669	CA P6 CHM1 Conservative 2.5%	LKHW01001688.1	10580783	10599296	+	99.78	97.35
NM_001166239.1	10669	CA P6 CHM1 Conservative 2.5%	LKHW01001688.1	10581005	10599296	+	99.76	97.13
NM_018969.5	54328	CA P6 CHM1 Conservative 2.5%	LKHW01004205.1	65793	66219	-	100	10.04
NM_022126.3	64077	CA P6 CHM1 Conservative 2.5%	LKHW01000345.1	6356	104580	+	100	57.74
NM_022126.3	64077	CA P6 CHM1 Conservative 2.5%	LKHW01001418.1	2327392	2372142	+	98.07	45.5
NM_001170714.1	9564	CA P6 CHM1 Conservative 2.5%	LKHW01000166.1	33326	33959	-	96.84	17.88
NM_001170715.1	9564	CA P6 CHM1 Conservative 2.5%	LKHW01000166.1	33326	33990	-	94.36	20.25
NM_001170716.1	9564	CA P6 CHM1 Conservative 2.5%	LKHW01000166.1	33326	51930	-	96.07	20.62
NM_001170717.1	9564	CA P6 CHM1 Conservative 2.5%	LKHW01000166.1	24617	34109	-	96.45	24.64
NM_001170718.1	9564	CA P6 CHM1 Conservative 2.5%	LKHW01000166.1	33326	34090	-	89.41	22.57
NM_014567.3	9564	CA P6 CHM1 Conservative 2.5%	LKHW01000166.1	33334	34109	-	97.42	23.82
NM_001170719.1	9564	CA P6 CHM1 Conservative 2.5%	LKHW01000166.1	33326	33957	-	96.99	18.68
NM_001001671.3	389840	CA P6 CHM1 Conservative 2.5%	LKHW01003545.1	230443	330373	-	100	84.5
NM_001001671.3	389840	CA P6 CHM1 Conservative 2.5%	LKHW01001096.1	3647873	3676658	+	99.81	11.39
NM_199454.2	63976	CA P6 CHM1 Conservative 2.5%	LKHW01004232.1	25747	79200	+	99.84	93.99
NM_199454.2	63976	CA P6 CHM1 Conservative 2.5%	LKHW01003566.1	58920	260434	-	97.15	6.83
NM_022114.3	63976	CA P6 CHM1 Conservative 2.5%	LKHW01004232.1	25747	79200	+	99.84	94.03
NM_022114.3	63976	CA P6 CHM1 Conservative 2.5%	LKHW01003566.1	58920	260434	-	97.15	6.78
NM_020972.2	57732	CA P6 CHM1 Conservative 2.5%	LKHW01001965.1	10070	108259	-	100	27.22
NM_020972.2	57732	CA P6 CHM1 Conservative 2.5%	LKHW01002944.1	492649	497271	-	100	42.41
NM_001172656.1	57732	CA P6 CHM1 Conservative 2.5%	LKHW01001965.1	10070	108259	-	100	25.6
NM_001172656.1	57732	CA P6 CHM1 Conservative 2.5%	LKHW01002944.1	492649	514994	-	98.7	46.14
NM_001172659.1	57732	CA P6 CHM1 Conservative 2.5%	LKHW01001965.1	10070	54672	-	99.82	27.8
NM_001172659.1	57732	CA P6 CHM1 Conservative 2.5%	LKHW01002944.1	492649	497271	-	100	42.07
NM_005044.4	5613	CA P6 CHM1 Conservative 2.5%	LKHW01002622.1	835111	905540	-	99.81	90.94
NM_016937.3	5422	CA P6 CHM1 Conservative 2.5%	LKHW01003560.1	20627	239748	+	99.23	48.25
NM_016937.3	5422	CA P6 CHM1 Conservative 2.5%	LKHW01004471.1	640457	695501	+	100	54.28
NM_139055.2	170689	CA P6 CHM1 Conservative 2.5%	LKHW01004316.1	4874	18694	-	99.67	27.43
NM_006612.5	10749	CA P6 CHM1 Conservative 2.5%	LKHW01002630.1	795	9200	+	99.98	74.46
NM_005823.5	10232	CA P6 CHM1 Conservative 2.5%	LKHW01002777.1	1	5846	-	99.92	63.42
NM_001177355.1	10232	CA P6 CHM1 Conservative 2.5%	LKHW01002777.1	1	5845	-	99.92	62.37
NM_013404.4	10232	CA P6 CHM1 Conservative 2.5%	LKHW01002777.1	1	5538	-	99.92	61.74
NM_172213.3	926	CA P6 CHM1 Conservative 2.5%	LKHW01002969.1	91176	108174	+	100	63.49
NM_172101.3	926	CA P6 CHM1 Conservative 2.5%	LKHW01002969.1	91176	108173	+	100	60.35
NM_172102.3	926	CA P6 CHM1 Conservative 2.5%	LKHW01002969.1	91176	108174	+	100	60.14
NM_001178100.1	926	CA P6 CHM1 Conservative 2.5%	LKHW01002969.1	91176	100104	+	100	58.58
NM_001184767.1	139105	CA P6 CHM1 Conservative 2.5%	LKHW01003226.1	402149	445136	-	99.65	81.83
NM_003429.4	7639	CA P6 CHM1 Conservative 2.5%	LKHW01001804.1	14934772	14955727	+	82.83	14.62
NM_001193376.1	7015	CA P6 CHM1 Conservative 2.5%	LKHW01001697.1	26288	29104	-	99.96	68.63
NM_002458.2	727897	CA P6 CHM1 Conservative 2.5%	LKHW01003243.1	377257	400078	+	99.83	50.62
NM_002458.2	727897	CA P6 CHM1 Conservative 2.5%	LKHW01001592.1	2116042	2124004	-	100	14.73
NM_001101401.2	646643	CA P6 CHM1 Conservative 2.5%	LKHW01004116.1	79732	81010	-	99.87	74.95
NM_001193484.1	3987	CA P6 CHM1 Conservative 2.5%	LKHW01000594.1	1082869	1110519	-	99.9	95.18
NM_198544.3	100526739	CA P6 CHM1 Conservative 2.5%	LKHW01000013.1	7337419	7337772	+	78.57	25.49
NM_022359.5	9659	CA P6 CHM1 Conservative 2.5%	LKHW01004708.1	23910	28816	-	98.58	49.91
NM_022359.5	9659	CA P6 CHM1 Conservative 2.5%	LKHW01002665.1	39009	120229	-	99.65	51.19
NM_001195260.1	9659	CA P6 CHM1 Conservative 2.5%	LKHW01004708.1	23910	34326	-	99.05	88.71
NM_001195261.1	9659	CA P6 CHM1 Conservative 2.5%	LKHW01004708.1	23910	27448	-	99.39	77.72
NM_001195261.1	9659	CA P6 CHM1 Conservative 2.5%	LKHW01002665.1	39009	39500	-	100	22.18
NM_001002810.3	9659	CA P6 CHM1 Conservative 2.5%	LKHW01004708.1	23910	27448	-	99.39	65.07
NM_001002810.3	9659	CA P6 CHM1 Conservative 2.5%	LKHW01002665.1	39009	39451	-	99.77	34.66
NM_001040260.3	166614	CA P6 CHM1 Conservative 2.5%	LKHW01004239.1	6140465	6312252	+	100	66.14
NM_001040260.3	166614	CA P6 CHM1 Conservative 2.5%	LKHW01003225.1	6126	7572	+	99.17	33.92
NM_001040261.4	166614	CA P6 CHM1 Conservative 2.5%	LKHW01004239.1	6140465	6312252	+	100	66.68
NM_001040261.4	166614	CA P6 CHM1 Conservative 2.5%	LKHW01003225.1	6126	7572	+	99.17	33.52
NM_001195563.1	23261	CA P6 CHM1 Conservative 2.5%	LKHW01000009.1	16654471	16654959	+	81.92	65.67
NM_001198542.1	54768	CA P6 CHM1 Conservative 2.5%	LKHW01000408.1	5300	103562	+	99.64	63.26
NM_001198542.1	54768	CA P6 CHM1 Conservative 2.5%	LKHW01000024.1	1628	102663	-	99.61	41.49
NM_001198543.1	54768	CA P6 CHM1 Conservative 2.5%	LKHW01000408.1	5300	103562	+	99.64	63.86
NM_001198543.1	54768	CA P6 CHM1 Conservative 2.5%	LKHW01000024.1	1628	102663	-	99.61	40.93
NM_001199011.1	84516	CA P6 CHM1 Conservative 2.5%	LKHW01003463.1	2135315	2135511	+	92.38	28.18
NM_015124.3	23151	CA P6 CHM1 Conservative 2.5%	LKHW01003582.1	203129	245634	-	99.95	95.34
NM_001201450.1	401388	CA P6 CHM1 Conservative 2.5%	LKHW01001679.1	1413819	1435674	+	99.81	98.44
NM_001201451.1	401388	CA P6 CHM1 Conservative 2.5%	LKHW01001679.1	1413819	1435674	+	99.81	98.43
NM_016069.9	51025	CA P6 CHM1 Conservative 2.5%	LKHW01002763.1	735322	735463	+	100	23.66
NM_001201479.1	100529144	CA P6 CHM1 Conservative 2.5%	LKHW01002763.1	669739	732565	+	99.84	88.04
NM_004469.4	2277	CA P6 CHM1 Conservative 2.5%	LKHW01001095.1	593	13199	+	100	63.06
NM_004469.4	2277	CA P6 CHM1 Conservative 2.5%	LKHW01001591.1	1325	22637	-	99.87	36.99
NM_016434.3	51750	CA P6 CHM1 Conservative 2.5%	LKHW01003536.1	1254	33952	-	99.85	68.08
NM_016434.3	51750	CA P6 CHM1 Conservative 2.5%	LKHW01003557.1	1188	3072	+	99.73	22.98
NM_032957.4	51750	CA P6 CHM1 Conservative 2.5%	LKHW01003536.1	1254	33952	-	99.85	68.54
NM_032957.4	51750	CA P6 CHM1 Conservative 2.5%	LKHW01003557.1	1188	3072	+	99.73	22.65
NM_001204199.1	6728	CA P6 CHM1 Conservative 2.5%	LKHW01001591.1	413264	461447	+	94.99	70.76
NM_002561.3	5026	CA P6 CHM1 Conservative 2.5%	LKHW01003744.1	209	16782	+	99.86	63.83
NM_175080.2	5026	CA P6 CHM1 Conservative 2.5%	LKHW01003744.1	209	16782	+	99.86	65.84
NM_001204519.1	5026	CA P6 CHM1 Conservative 2.5%	LKHW01003744.1	209	16782	+	99.86	63.79
NM_001204520.1	5026	CA P6 CHM1 Conservative 2.5%	LKHW01003744.1	209	16782	+	99.86	65.89
NM_022463.4	64359	CA P6 CHM1 Conservative 2.5%	LKHW01002928.1	109068	134691	+	99.69	85.51
NM_001220488.1	1012	CA P6 CHM1 Conservative 2.5%	LKHW01001132.1	1574303	2513918	-	99.86	89.14
NM_001220491.1	1012	CA P6 CHM1 Conservative 2.5%	LKHW01001132.1	2190758	2513923	-	99.33	64.17
NM_001220492.1	1012	CA P6 CHM1 Conservative 2.5%	LKHW01001132.1	2190758	2513923	-	99.38	65.92
NM_002627.4	5214	CA P6 CHM1 Conservative 2.5%	LKHW01003208.1	10534	48218	+	99.75	90.62
NM_002627.4	5214	CA P6 CHM1 Conservative 2.5%	LKHW01001109.1	385	15329	-	99.62	9.97
NM_001242672.1	100287898	CA P6 CHM1 Conservative 2.5%	LKHW01003738.1	5729	9929	+	99.9	57.4
NM_001242672.1	100287898	CA P6 CHM1 Conservative 2.5%	LKHW01004336.1	21669	27726	+	100	42.92
NM_001130413.3	6339	CA P6 CHM1 Conservative 2.5%	LKHW01004030.1	1	1565	+	99.62	34.7
NM_001130413.3	6339	CA P6 CHM1 Conservative 2.5%	LKHW01004415.1	31	1973	-	95.19	20.63
NM_001037144.5	116840	CA P6 CHM1 Conservative 2.5%	LKHW01003535.1	384	15318	+	99.74	66.64
NM_053051.3	116840	CA P6 CHM1 Conservative 2.5%	LKHW01003535.1	384	15318	+	99.73	66.1
NM_001003828.2	29780	CA P6 CHM1 Conservative 2.5%	LKHW01003041.1	494822	544953	-	100	73.39
NM_001003828.2	29780	CA P6 CHM1 Conservative 2.5%	LKHW01000355.1	5909448	5909910	+	99.7	18.03
NM_013327.4	29780	CA P6 CHM1 Conservative 2.5%	LKHW01003041.1	494822	544953	-	100	80.5
NM_001243385.1	29780	CA P6 CHM1 Conservative 2.5%	LKHW01003041.1	494822	544953	-	100	87.05
NM_001243386.1	29780	CA P6 CHM1 Conservative 2.5%	LKHW01003041.1	494822	544953	-	100	84.95
NM_014311.2	23583	CA P6 CHM1 Conservative 2.5%	LKHW01000009.1	6453077	6461611	-	99.88	98.14
NM_001243787.1	23583	CA P6 CHM1 Conservative 2.5%	LKHW01000009.1	6453077	6461611	-	99.88	98.14
NM_001243788.1	23583	CA P6 CHM1 Conservative 2.5%	LKHW01000009.1	6453077	6461611	-	99.92	98.08
NM_001243789.1	23583	CA P6 CHM1 Conservative 2.5%	LKHW01000009.1	6454172	6461574	-	99.89	95.11
NM_001243791.1	23583	CA P6 CHM1 Conservative 2.5%	LKHW01000009.1	6454172	6461611	-	100	92.45
NM_001243790.1	23583	CA P6 CHM1 Conservative 2.5%	LKHW01000009.1	6454172	6461574	-	99.88	94.69
NM_018271.4	55258	CA P6 CHM1 Conservative 2.5%	LKHW01004486.1	973764	977707	-	99.91	59.01
NM_018271.4	55258	CA P6 CHM1 Conservative 2.5%	LKHW01004647.1	210303	216181	+	99.75	41.1
NM_001244676.1	55258	CA P6 CHM1 Conservative 2.5%	LKHW01004486.1	973764	977707	-	99.91	55.01
NM_001244676.1	55258	CA P6 CHM1 Conservative 2.5%	LKHW01004647.1	207474	216181	+	98.98	45.08
NM_001244678.1	55258	CA P6 CHM1 Conservative 2.5%	LKHW01004486.1	973764	977707	-	99.9	65.15
NM_001244678.1	55258	CA P6 CHM1 Conservative 2.5%	LKHW01004647.1	207474	216181	+	98.36	35.01
NM_032515.4	666	CA P6 CHM1 Conservative 2.5%	LKHW01003578.1	234754	238774	-	98.93	77.37
NM_001014980.2	388581	CA P6 CHM1 Conservative 2.5%	LKHW01004381.1	37129	38186	-	100	41.51
NM_003985.4	8711	CA P6 CHM1 Conservative 2.5%	LKHW01003763.1	141496	145279	+	99.92	47.04
NM_001251902.1	8711	CA P6 CHM1 Conservative 2.5%	LKHW01003763.1	141496	145279	+	99.92	46.8
NM_024531.4	79581	CA P6 CHM1 Conservative 2.5%	LKHW01004140.1	1	1726	-	100	59.31
NM_001253815.1	79581	CA P6 CHM1 Conservative 2.5%	LKHW01004140.1	1	1761	-	100	57.19
NM_001253816.1	79581	CA P6 CHM1 Conservative 2.5%	LKHW01004140.1	1	1785	-	100	56.71
NM_016013.3	51103	CA P6 CHM1 Conservative 2.5%	LKHW01001682.1	5252	12845	-	99.74	77.75
NM_001256171.1	7639	CA P6 CHM1 Conservative 2.5%	LKHW01000009.1	10242103	10262034	+	85.27	17.98
NM_001256172.1	7639	CA P6 CHM1 Conservative 2.5%	LKHW01000009.1	10242103	10242487	+	85.82	23.67
NM_001128141.2	1800	CA P6 CHM1 Conservative 2.5%	LKHW01003552.1	1686	4209	+	99.92	81.37
NM_001092.4	29	CA P6 CHM1 Conservative 2.5%	LKHW01004133.1	826	56910	+	99.84	78.25
NM_001092.4	29	CA P6 CHM1 Conservative 2.5%	LKHW01004142.1	11114	53435	-	99.9	21.75
NM_001159746.2	29	CA P6 CHM1 Conservative 2.5%	LKHW01004133.1	826	56910	+	99.84	70.69
NM_001159746.2	29	CA P6 CHM1 Conservative 2.5%	LKHW01004142.1	11114	69886	-	99.91	19.98
NM_001159746.2	29	CA P6 CHM1 Conservative 2.5%	LKHW01002634.1	21472	37091	-	98.07	10.17
NM_021988.5	7335	CA P6 CHM1 Conservative 2.5%	LKHW01003059.1	414190	416004	+	94.11	71.31
NM_199144.2	7335	CA P6 CHM1 Conservative 2.5%	LKHW01003059.1	414190	416004	+	94.11	73.53
NM_001257393.1	7335	CA P6 CHM1 Conservative 2.5%	LKHW01003059.1	414190	416004	+	94.11	77.66
NM_001258019.1	2890	CA P6 CHM1 Conservative 2.5%	LKHW01000350.1	6365955	6415360	-	100	64.57
NM_001258019.1	2890	CA P6 CHM1 Conservative 2.5%	LKHW01004240.1	434091	659912	+	99.15	36.64
NM_001258020.1	2890	CA P6 CHM1 Conservative 2.5%	LKHW01000350.1	6365955	6415360	-	100	61.25
NM_001258020.1	2890	CA P6 CHM1 Conservative 2.5%	LKHW01004240.1	434091	659912	+	99.14	40.24
NM_001258021.1	2890	CA P6 CHM1 Conservative 2.5%	LKHW01000350.1	6365955	6415360	-	100	65.38
NM_001258021.1	2890	CA P6 CHM1 Conservative 2.5%	LKHW01004240.1	435739	659912	+	99.12	35.85
NM_001258022.1	2890	CA P6 CHM1 Conservative 2.5%	LKHW01000350.1	6365955	6415360	-	100	65.38
NM_001258022.1	2890	CA P6 CHM1 Conservative 2.5%	LKHW01004240.1	435739	659912	+	98.98	36.23
NM_001258023.1	2890	CA P6 CHM1 Conservative 2.5%	LKHW01000350.1	6365955	6415360	-	100	66.64
NM_001258023.1	2890	CA P6 CHM1 Conservative 2.5%	LKHW01004240.1	434864	659912	+	99.08	34.61
NM_001258205.1	162514	CA P6 CHM1 Conservative 2.5%	LKHW01002159.1	1951	21667	+	99.72	77.32
NM_001258205.1	162514	CA P6 CHM1 Conservative 2.5%	LKHW01003744.1	132013	151892	+	99.37	13.04
NM_145068.3	162514	CA P6 CHM1 Conservative 2.5%	LKHW01002159.1	1951	21667	+	99.72	77.31
NM_145068.3	162514	CA P6 CHM1 Conservative 2.5%	LKHW01003744.1	132013	151892	+	99.37	13.05
NM_001258323.1	9537	CA P6 CHM1 Conservative 2.5%	LKHW01003668.1	3210969	3216253	-	99.29	82.85
NM_001258323.1	9537	CA P6 CHM1 Conservative 2.5%	LKHW01002770.1	714576	714952	+	98.69	10.49
NM_001030288.2	6693	CA P6 CHM1 Conservative 2.5%	LKHW01001715.1	1	3231	+	99.87	46.52
NM_003123.4	6693	CA P6 CHM1 Conservative 2.5%	LKHW01001715.1	1	3231	+	99.87	46.75
NM_001267585.1	10517	CA P6 CHM1 Conservative 2.5%	LKHW01000029.1	4401658	4455582	-	99.07	91.45
NM_001267586.1	10517	CA P6 CHM1 Conservative 2.5%	LKHW01000029.1	4401658	4455582	-	98.87	91.53
NM_177533.4	256281	CA P6 CHM1 Conservative 2.5%	LKHW01002623.1	2295	6384	+	99.84	72.31
NM_001270837.1	1397	CA P6 CHM1 Conservative 2.5%	LKHW01003567.1	281156	281727	+	95.79	33.82
NM_017558.4	54768	CA P6 CHM1 Conservative 2.5%	LKHW01000408.1	5300	107863	+	99.83	67.07
NM_017558.4	54768	CA P6 CHM1 Conservative 2.5%	LKHW01000024.1	1628	102663	-	99.63	37
NM_001270974.1	54768	CA P6 CHM1 Conservative 2.5%	LKHW01000408.1	5300	114805	+	99.82	14.54
NM_001270974.1	54768	CA P6 CHM1 Conservative 2.5%	LKHW01000412.1	2438	129627	+	99.18	51.39
NM_001270974.1	54768	CA P6 CHM1 Conservative 2.5%	LKHW01000024.1	1628	102663	-	99.63	8.73
NM_001270974.1	54768	CA P6 CHM1 Conservative 2.5%	LKHW01000410.1	2252	56409	+	99.71	22.08
NM_001271015.1	55284	CA P6 CHM1 Conservative 2.5%	LKHW01003653.1	6744704	6745028	-	94.76	34.17
NM_178233.2	347741	CA P6 CHM1 Conservative 2.5%	LKHW01002155.1	1330892	1334226	-	100	66.11
NM_001272005.1	347741	CA P6 CHM1 Conservative 2.5%	LKHW01002155.1	1330892	1334226	-	100	64.32
NM_020713.2	57473	CA P6 CHM1 Conservative 2.5%	LKHW01003557.1	266232	272638	-	99.97	66.04
NM_020713.2	57473	CA P6 CHM1 Conservative 2.5%	LKHW01004186.1	1	5665	-	100	23.64
NM_001039703.5	100132406	CA P6 CHM1 Conservative 2.5%	LKHW01001269.1	583	39949	+	98.12	58.03
NM_001039703.5	100132406	CA P6 CHM1 Conservative 2.5%	LKHW01000505.1	2922	29414	+	96.96	28.41
NM_001277945.1	55769	CA P6 CHM1 Conservative 2.5%	LKHW01001713.1	74551	152573	-	99.82	97.19
NM_001277946.1	55769	CA P6 CHM1 Conservative 2.5%	LKHW01001713.1	117656	152573	-	99.42	12.49
NM_001277947.1	55769	CA P6 CHM1 Conservative 2.5%	LKHW01001713.1	74551	152573	-	99.82	97.14
NM_001277948.1	55769	CA P6 CHM1 Conservative 2.5%	LKHW01001713.1	74551	152573	-	99.85	97.07
NM_001277949.1	55769	CA P6 CHM1 Conservative 2.5%	LKHW01001713.1	74551	152573	-	99.82	97.11
NM_001277952.1	55769	CA P6 CHM1 Conservative 2.5%	LKHW01001713.1	74551	100482	-	99.85	97.04
NM_001277961.1	6786	CA P6 CHM1 Conservative 2.5%	LKHW01003862.1	22638	91991	+	99.94	80.8
NM_001277961.1	6786	CA P6 CHM1 Conservative 2.5%	LKHW01002487.1	59157	171092	-	100	19.13
NM_001277962.1	6786	CA P6 CHM1 Conservative 2.5%	LKHW01003862.1	22638	91991	+	99.93	79.48
NM_001277962.1	6786	CA P6 CHM1 Conservative 2.5%	LKHW01002487.1	59157	171092	-	100	20.44
NM_001278189.1	7170	CA P6 CHM1 Conservative 2.5%	LKHW01000004.1	1261721	1278158	+	94.42	73.23
NM_001278267.1	100288142	CA P6 CHM1 Conservative 2.5%	LKHW01000426.1	495	39216	+	96.86	35.46
NM_001278267.1	100288142	CA P6 CHM1 Conservative 2.5%	LKHW01001269.1	583	39949	+	97.52	34.13
NM_001278267.1	100288142	CA P6 CHM1 Conservative 2.5%	LKHW01004528.1	510	26773	-	96.27	19.78
NM_015383.2	25832	CA P6 CHM1 Conservative 2.5%	LKHW01000425.1	553	41838	+	98.53	76.84
NM_015383.2	25832	CA P6 CHM1 Conservative 2.5%	LKHW01004732.1	30390	53375	+	96.83	18.03
NM_003585.4	8447	CA P6 CHM1 Conservative 2.5%	LKHW01004284.1	5517	7906	+	99.89	47.08
NM_005560.4	3911	CA P6 CHM1 Conservative 2.5%	LKHW01004455.1	4786	25036	+	99.6	37.35
NM_005560.4	3911	CA P6 CHM1 Conservative 2.5%	LKHW01003859.1	24929672	24934488	-	100	25.04
NM_005560.4	3911	CA P6 CHM1 Conservative 2.5%	LKHW01003997.1	80013	86064	+	98.21	3.4
NM_018078.3	55132	CA P6 CHM1 Conservative 2.5%	LKHW01004246.1	1033721	1034893	-	75.62	28.07
NM_178043.2	55132	CA P6 CHM1 Conservative 2.5%	LKHW01004246.1	1033721	1034893	-	75.62	59.36
NM_001198832.2	9659	CA P6 CHM1 Conservative 2.5%	LKHW01002662.1	31054	92391	-	99.53	79.11
NM_001198832.2	9659	CA P6 CHM1 Conservative 2.5%	LKHW01004708.1	24349	28816	-	97.56	4.97
NM_001198832.2	9659	CA P6 CHM1 Conservative 2.5%	LKHW01002665.1	6962	84089	-	98.13	9.81
NM_001198834.3	9659	CA P6 CHM1 Conservative 2.5%	LKHW01002662.1	31054	92391	-	99.5	82.94
NM_001198834.3	9659	CA P6 CHM1 Conservative 2.5%	LKHW01004708.1	24349	27448	-	99.21	4.57
NM_001198834.3	9659	CA P6 CHM1 Conservative 2.5%	LKHW01002665.1	16508	39451	-	95.91	6.32
NM_014644.5	9659	CA P6 CHM1 Conservative 2.5%	LKHW01002662.1	31054	92391	-	99.51	83.06
NM_014644.5	9659	CA P6 CHM1 Conservative 2.5%	LKHW01004708.1	24349	27448	-	99.21	4.54
NM_014644.5	9659	CA P6 CHM1 Conservative 2.5%	LKHW01002665.1	16508	39451	-	95.91	6.28
NM_001002812.2	9659	CA P6 CHM1 Conservative 2.5%	LKHW01002662.1	70501	92391	-	99.5	70.71
NM_001002812.2	9659	CA P6 CHM1 Conservative 2.5%	LKHW01004708.1	5462	27448	-	97.64	8.71
NM_001002812.2	9659	CA P6 CHM1 Conservative 2.5%	LKHW01002665.1	30410	39451	-	98.17	10.17
NM_001002811.2	9659	CA P6 CHM1 Conservative 2.5%	LKHW01002662.1	70501	100915	-	99.5	91.58
NM_173537.3	84163	CA P6 CHM1 Conservative 2.5%	LKHW01004722.1	1517186	1543817	-	99.6	83.97
NM_173537.3	84163	CA P6 CHM1 Conservative 2.5%	LKHW01004745.1	17265	48011	+	98.81	20.97
NM_024318.3	79168	CA P6 CHM1 Conservative 2.5%	LKHW01001713.1	1713117	1715950	-	97.57	90.6
NM_006521.5	7030	CA P6 CHM1 Conservative 2.5%	LKHW01004275.1	50166	50572	+	99.75	11.73
NM_001282142.1	7030	CA P6 CHM1 Conservative 2.5%	LKHW01004275.1	50166	50572	+	99.75	11.96
NM_021962.4	29	CA P6 CHM1 Conservative 2.5%	LKHW01004133.1	826	56910	+	99.84	73.52
NM_021962.4	29	CA P6 CHM1 Conservative 2.5%	LKHW01004142.1	11114	69886	-	99.91	20.77
NM_021962.4	29	CA P6 CHM1 Conservative 2.5%	LKHW01002634.1	29436	29743	-	99.67	5.7
NM_001282149.1	29	CA P6 CHM1 Conservative 2.5%	LKHW01004133.1	826	56910	+	99.84	82.97
NM_001282149.1	29	CA P6 CHM1 Conservative 2.5%	LKHW01004142.1	11114	23460	-	99.87	17.04
NM_015698.5	27238	CA P6 CHM1 Conservative 2.5%	LKHW01004387.1	25048	33146	+	99.24	75.08
NM_015381.6	25817	CA P6 CHM1 Conservative 2.5%	LKHW01002157.1	1219633	1326071	-	99.74	90.38
NM_015381.6	25817	CA P6 CHM1 Conservative 2.5%	LKHW01001970.1	1694611	1694880	+	99.62	10.22
NM_001082967.2	25817	CA P6 CHM1 Conservative 2.5%	LKHW01002157.1	1219633	1345410	-	99.34	93.32
NM_001282855.1	154865	CA P6 CHM1 Conservative 2.5%	LKHW01000004.1	28919646	28920219	-	99.12	16.33
NM_001283009.1	51750	CA P6 CHM1 Conservative 2.5%	LKHW01003536.1	1254	33952	-	99.85	65.83
NM_001283009.1	51750	CA P6 CHM1 Conservative 2.5%	LKHW01003557.1	1188	3072	+	99.77	25.54
NM_001283010.1	51750	CA P6 CHM1 Conservative 2.5%	LKHW01003536.1	1254	33952	-	99.87	66.19
NM_001283010.1	51750	CA P6 CHM1 Conservative 2.5%	LKHW01003557.1	1188	3072	+	99.73	24.35
NM_001284305.1	25771	CA P6 CHM1 Conservative 2.5%	LKHW01001970.1	7322	292390	+	99.38	74.93
NM_001284305.1	25771	CA P6 CHM1 Conservative 2.5%	LKHW01003582.1	1670	108588	-	99.17	24.93
NM_001284303.1	25771	CA P6 CHM1 Conservative 2.5%	LKHW01001970.1	6257	292390	+	99.15	82.23
NM_001284303.1	25771	CA P6 CHM1 Conservative 2.5%	LKHW01003582.1	1670	120288	-	98.93	18.41
NM_001284304.1	25771	CA P6 CHM1 Conservative 2.5%	LKHW01001970.1	7322	292390	+	99.38	73.79
NM_001284304.1	25771	CA P6 CHM1 Conservative 2.5%	LKHW01003582.1	1670	120288	-	99.22	26.08
NM_014346.3	25771	CA P6 CHM1 Conservative 2.5%	LKHW01001970.1	7322	292390	+	99.38	76.45
NM_014346.3	25771	CA P6 CHM1 Conservative 2.5%	LKHW01003582.1	1670	120288	-	99.1	23.41
NM_001284333.1	11011	CA P6 CHM1 Conservative 2.5%	LKHW01002352.1	848	63938	+	99.87	85.42
NM_001285449.1	23042	CA P6 CHM1 Conservative 2.5%	LKHW01000203.1	1794	56782	+	97.1	74.76
NM_001286246.1	196403	CA P6 CHM1 Conservative 2.5%	LKHW01000009.1	9879303	9884400	+	100	95.94
NM_001286245.1	196403	CA P6 CHM1 Conservative 2.5%	LKHW01000009.1	9879303	9884400	+	100	95.9
NM_178502.3	196403	CA P6 CHM1 Conservative 2.5%	LKHW01000009.1	9879303	9884400	+	100	96.23
NM_001284363.1	11011	CA P6 CHM1 Conservative 2.5%	LKHW01002352.1	848	63938	+	99.87	90.91
NM_002457.3	4583	CA P6 CHM1 Conservative 2.5%	LKHW01003243.1	230779	264456	+	98.42	77.19
NM_017820.4	54932	CA P6 CHM1 Conservative 2.5%	LKHW01003720.1	7296	65040	-	99.76	29.49
NM_017820.4	54932	CA P6 CHM1 Conservative 2.5%	LKHW01000921.1	7683	48065	+	98.94	22.99
NM_001026383.2	79741	CA P6 CHM1 Conservative 2.5%	LKHW01001835.1	1511477	1528084	-	92.58	24.18
NM_145023.5	79741	CA P6 CHM1 Conservative 2.5%	LKHW01001835.1	1511477	1511902	-	93.42	19.48
NM_001288813.1	51326	CA P6 CHM1 Conservative 2.5%	LKHW01000352.1	278191	279964	+	99.15	81.65
NM_001288812.1	51326	CA P6 CHM1 Conservative 2.5%	LKHW01000529.1	606	845	+	91.86	31.86
NM_001288811.1	51326	CA P6 CHM1 Conservative 2.5%	LKHW01000352.1	269845	279964	+	99.08	82.41
NM_201400.3	196483	CA P6 CHM1 Conservative 2.5%	LKHW01002763.1	884	2319	+	99.79	59.6
NM_201598.3	196483	CA P6 CHM1 Conservative 2.5%	LKHW01002763.1	884	2319	+	99.79	62.23
NM_001289029.1	196483	CA P6 CHM1 Conservative 2.5%	LKHW01002763.1	884	2319	+	99.79	64.5
NM_001014812.2	84191	CA P6 CHM1 Conservative 2.5%	LKHW01004249.1	4146894	4164008	-	88.67	83.58
NM_025045.5	80115	CA P6 CHM1 Conservative 2.5%	LKHW01003847.1	256	23331	+	98.9	85.17
NM_001395.3	1852	CA P6 CHM1 Conservative 2.5%	LKHW01004276.1	40764	41756	-	99.27	40.54
NM_001289953.1	388561	CA P6 CHM1 Conservative 2.5%	LKHW01000112.1	3533283	3583440	+	86.11	78.72
NM_003954.4	9020	CA P6 CHM1 Conservative 2.5%	LKHW01000352.1	2481	49146	-	99.62	46.89
NM_003954.4	9020	CA P6 CHM1 Conservative 2.5%	LKHW01002475.1	1	1079	+	100	24.05
NM_001290210.1	100131827	CA P6 CHM1 Conservative 2.5%	LKHW01003833.1	15308	27212	+	99.25	78.64
NM_130797.3	1804	CA P6 CHM1 Conservative 2.5%	LKHW01000218.1	3263981	3736456	-	99.26	87.88
NM_130797.3	1804	CA P6 CHM1 Conservative 2.5%	LKHW01000219.1	88624	89281	-	98.33	13.59
NM_001290253.1	1804	CA P6 CHM1 Conservative 2.5%	LKHW01000218.1	3569245	3736456	-	99.02	71.02
NM_001290253.1	1804	CA P6 CHM1 Conservative 2.5%	LKHW01000219.1	88624	89281	-	98.33	31.65
NM_006865.4	11026	CA P6 CHM1 Conservative 2.5%	LKHW01001713.1	1788961	1805626	-	84.5	62.99
NM_001172654.2	11026	CA P6 CHM1 Conservative 2.5%	LKHW01001713.1	1788961	1805581	-	84.4	69.75
NM_017848.5	54954	CA P6 CHM1 Conservative 2.5%	LKHW01003411.1	320257	364389	-	99.26	71.11
NM_017848.5	54954	CA P6 CHM1 Conservative 2.5%	LKHW01004241.1	247428	298004	+	99.95	26.61
NM_003386.2	7455	CA P6 CHM1 Conservative 2.5%	LKHW01004252.1	33278	76246	+	99.9	74.57
NM_003386.2	7455	CA P6 CHM1 Conservative 2.5%	LKHW01003954.1	172746	185921	-	99.94	21.7
NM_173059.2	7455	CA P6 CHM1 Conservative 2.5%	LKHW01004252.1	33278	76246	+	99.9	76.99
NM_173059.2	7455	CA P6 CHM1 Conservative 2.5%	LKHW01003954.1	172746	185921	-	99.93	19.16
NM_001039464.3	374977	CA P6 CHM1 Conservative 2.5%	LKHW01001250.1	2398	63408	-	99.74	89.27
NM_001039464.3	374977	CA P6 CHM1 Conservative 2.5%	LKHW01003393.1	2117	3368	+	100	8.81
NM_001291332.1	374977	CA P6 CHM1 Conservative 2.5%	LKHW01001250.1	2398	63408	-	99.68	84.54
NM_001291332.1	374977	CA P6 CHM1 Conservative 2.5%	LKHW01003393.1	2117	3368	+	100	12.69
NM_001276343.2	119016	CA P6 CHM1 Conservative 2.5%	LKHW01000317.1	728	19260	+	99.56	83.1
NM_001276343.2	119016	CA P6 CHM1 Conservative 2.5%	LKHW01000290.1	26144	31940	+	99.42	20.83
NM_133446.3	119016	CA P6 CHM1 Conservative 2.5%	LKHW01000317.1	719	19260	+	99.42	85.82
NM_133446.3	119016	CA P6 CHM1 Conservative 2.5%	LKHW01000290.1	26144	31940	+	99.34	18.6
NM_152286.4	375775	CA P6 CHM1 Conservative 2.5%	LKHW01003720.1	101294	140302	-	99.85	56.91
NM_152286.4	375775	CA P6 CHM1 Conservative 2.5%	LKHW01002484.1	701897	737974	+	100	31.86
NM_001009609.3	139067	CA P6 CHM1 Conservative 2.5%	LKHW01000910.1	4043	4472	+	99.76	72.88
NM_001098537.2	375775	CA P6 CHM1 Conservative 2.5%	LKHW01003720.1	101294	140302	-	99.85	56.03
NM_001098537.2	375775	CA P6 CHM1 Conservative 2.5%	LKHW01002484.1	701897	737974	+	100	32.91
NM_012312.4	100132285	CA P6 CHM1 Conservative 2.5%	LKHW01003423.1	322905	331797	+	98.17	48.69
NM_001291695.1	100132285	CA P6 CHM1 Conservative 2.5%	LKHW01003423.1	322905	331797	+	98.17	50.82
NM_001291696.1	100132285	CA P6 CHM1 Conservative 2.5%	LKHW01003423.1	322905	331797	+	97.63	36.6
NM_001291701.1	100132285	CA P6 CHM1 Conservative 2.5%	LKHW01003423.1	322905	328513	+	97.26	47.43
NM_018452.5	729515	CA P6 CHM1 Conservative 2.5%	LKHW01003487.1	22109	26082	+	99.72	78.42
NM_018452.5	729515	CA P6 CHM1 Conservative 2.5%	LKHW01000027.1	10235538	10241031	+	99.18	21.63
NM_020790.1	200958	CA P6 CHM1 Conservative 2.5%	LKHW01001395.1	387396	392563	-	98.08	72.6
NM_001291833.1	200958	CA P6 CHM1 Conservative 2.5%	LKHW01001395.1	387396	392563	-	96.69	74.25
NM_152673.3	200958	CA P6 CHM1 Conservative 2.5%	LKHW01001395.1	387396	392563	-	97.19	74.4
NM_001145440.2	441250	CA P6 CHM1 Conservative 2.5%	LKHW01003857.1	4379944	4519348	-	99.83	57.17
NM_001145440.2	441250	CA P6 CHM1 Conservative 2.5%	LKHW01004049.1	10578	61272	-	100	35.41
NM_206862.3	10579	CA P6 CHM1 Conservative 2.5%	LKHW01001418.1	13831	135714	+	99.94	38.83
NM_206862.3	10579	CA P6 CHM1 Conservative 2.5%	LKHW01000537.1	4853301	4952756	+	99.83	61.09
NM_001291876.1	10579	CA P6 CHM1 Conservative 2.5%	LKHW01001418.1	13831	135714	+	99.94	36.43
NM_001291876.1	10579	CA P6 CHM1 Conservative 2.5%	LKHW01000537.1	4853301	4952121	+	99.84	62.22
NM_001291877.1	10579	CA P6 CHM1 Conservative 2.5%	LKHW01001418.1	13830	135714	+	99.94	35.87
NM_001291877.1	10579	CA P6 CHM1 Conservative 2.5%	LKHW01000537.1	4853301	4952899	+	99.85	64.01
NM_001134407.2	2903	CA P6 CHM1 Conservative 2.5%	LKHW01000545.1	16327	201295	+	99.91	93.46
NM_001134407.2	2903	CA P6 CHM1 Conservative 2.5%	LKHW01000201.1	4554787	4557223	+	100	6.55
NM_000833.4	2903	CA P6 CHM1 Conservative 2.5%	LKHW01000545.1	16327	201295	+	99.91	95
NM_000833.4	2903	CA P6 CHM1 Conservative 2.5%	LKHW01000201.1	4554440	4557223	+	100	5.01
NM_001134408.2	2903	CA P6 CHM1 Conservative 2.5%	LKHW01000545.1	16327	201295	+	99.91	95.56
NM_001134408.2	2903	CA P6 CHM1 Conservative 2.5%	LKHW01000201.1	4555126	4557223	+	100	4.45
NM_001297740.1	6902	CA P6 CHM1 Conservative 2.5%	LKHW01000350.1	1803924	1804117	-	93.87	32.37
NM_001300788.1	54954	CA P6 CHM1 Conservative 2.5%	LKHW01003411.1	320178	364389	-	99.21	69.65
NM_001300788.1	54954	CA P6 CHM1 Conservative 2.5%	LKHW01004241.1	247405	298004	+	99.95	27.96
NM_001300815.1	1153	CA P6 CHM1 Conservative 2.5%	LKHW01003581.1	1	2121	-	100	35.98
NM_001300829.1	1153	CA P6 CHM1 Conservative 2.5%	LKHW01003581.1	1	2121	-	100	23.51
NM_001300847.1	222962	CA P6 CHM1 Conservative 2.5%	LKHW01001121.1	135241	142355	-	95.58	73.78
NM_015326.4	23380	CA P6 CHM1 Conservative 2.5%	LKHW01003262.1	16038812	16119213	-	99.96	85.76
NM_015326.4	23380	CA P6 CHM1 Conservative 2.5%	LKHW01003266.1	67908	68516	-	99.83	8.95
NM_001170637.3	23380	CA P6 CHM1 Conservative 2.5%	LKHW01003262.1	16038812	16119213	-	99.96	85.76
NM_001170637.3	23380	CA P6 CHM1 Conservative 2.5%	LKHW01003266.1	67908	68516	-	99.83	8.95
NM_001300952.1	23380	CA P6 CHM1 Conservative 2.5%	LKHW01003262.1	16047092	16119213	-	99.97	80.39
NM_001300952.1	23380	CA P6 CHM1 Conservative 2.5%	LKHW01003266.1	67908	68516	-	99.83	12.34
NM_021158.4	57761	CA P6 CHM1 Conservative 2.5%	LKHW01001106.1	2786501	2813753	-	91.38	27.05
NM_001301201.1	57761	CA P6 CHM1 Conservative 2.5%	LKHW01001106.1	2811757	2813088	-	99.75	16.65
NM_001301231.1	3149	CA P6 CHM1 Conservative 2.5%	LKHW01001405.1	186	5376	+	99.82	96.53
NM_000820.3	2621	CA P6 CHM1 Conservative 2.5%	LKHW01001975.1	1477864	1489486	-	100	49.07
NM_000820.3	2621	CA P6 CHM1 Conservative 2.5%	LKHW01003049.1	306	31639	-	98.57	41.08
NM_001302371.1	100132406	CA P6 CHM1 Conservative 2.5%	LKHW01001269.1	583	39949	+	98.36	55.68
NM_001302371.1	100132406	CA P6 CHM1 Conservative 2.5%	LKHW01000505.1	2922	29414	+	96.71	28.44
NM_001303013.1	9651	CA P6 CHM1 Conservative 2.5%	LKHW01003738.1	146383	172118	-	99.9	73.51
NM_001303013.1	9651	CA P6 CHM1 Conservative 2.5%	LKHW01004310.1	535	1979	-	97.73	24.7
NM_014638.3	9651	CA P6 CHM1 Conservative 2.5%	LKHW01003738.1	146383	172118	-	99.9	88.7
NM_014638.3	9651	CA P6 CHM1 Conservative 2.5%	LKHW01004310.1	1582	1979	-	100	8.19
NM_001303012.1	9651	CA P6 CHM1 Conservative 2.5%	LKHW01003738.1	146383	172118	-	99.92	93.52
NM_007183.3	11187	CA P6 CHM1 Conservative 2.5%	LKHW01003538.1	543	6215	-	99.21	48.69
NM_001303029.1	11187	CA P6 CHM1 Conservative 2.5%	LKHW01003538.1	543	7799	-	99.19	48.04
NM_130445.3	80781	CA P6 CHM1 Conservative 2.5%	LKHW01002171.1	6405	16127	+	99.96	48.86
NM_130445.3	80781	CA P6 CHM1 Conservative 2.5%	LKHW01003974.1	845	73569	-	100	20.2
NM_015201.4	23246	CA P6 CHM1 Conservative 2.5%	LKHW01002339.1	5128	19360	+	100	84.67
NM_015201.4	23246	CA P6 CHM1 Conservative 2.5%	LKHW01004140.1	69391	71737	+	99.73	15.57
NM_014695.2	9720	CA P6 CHM1 Conservative 2.5%	LKHW01004538.1	4256	63315	-	99.53	63.25
NM_014695.2	9720	CA P6 CHM1 Conservative 2.5%	LKHW01000029.1	4903340	4912513	-	95.41	9.27
NM_177457.4	66004	CA P6 CHM1 Conservative 2.5%	LKHW01003602.1	146	4311	+	99.88	91.06
NM_023946.3	66004	CA P6 CHM1 Conservative 2.5%	LKHW01003602.1	3616	11178	+	99.23	56.89
NM_177477.3	66004	CA P6 CHM1 Conservative 2.5%	LKHW01003602.1	146	4311	+	99.88	88.48
NM_177476.3	66004	CA P6 CHM1 Conservative 2.5%	LKHW01003602.1	146	4311	+	99.88	90.68
NM_032134.2	84074	CA P6 CHM1 Conservative 2.5%	LKHW01001133.1	4381291	4401779	+	99.97	68.3
NM_032134.2	84074	CA P6 CHM1 Conservative 2.5%	LKHW01002155.1	44	1942	+	100	6.04
NM_001304360.1	85452	CA P6 CHM1 Conservative 2.5%	LKHW01003229.1	193	60029	-	99.81	48.89
NM_001304360.1	85452	CA P6 CHM1 Conservative 2.5%	LKHW01003232.1	1	19031	+	99.8	46.24
NM_001304359.1	4586	CA P6 CHM1 Conservative 2.5%	LKHW01003243.1	311848	355334	+	99.84	93.58
NM_001306135.1	220107	CA P6 CHM1 Conservative 2.5%	LKHW01001595.1	1267675	1268056	-	99.21	27.92
NM_001308049.1	158471	CA P6 CHM1 Conservative 2.5%	LKHW01003851.1	5425	45391	-	97.64	17
NM_001308047.1	158471	CA P6 CHM1 Conservative 2.5%	LKHW01003851.1	5425	259395	-	99.46	69.43
NM_001308050.1	158471	CA P6 CHM1 Conservative 2.5%	LKHW01003851.1	5425	45391	-	97.12	14.35
NM_001308051.1	158471	CA P6 CHM1 Conservative 2.5%	LKHW01003851.1	5454	45391	-	99.83	13.97
NM_001308048.1	158471	CA P6 CHM1 Conservative 2.5%	LKHW01003851.1	5454	259395	-	99.66	69.18
NM_001308245.1	153579	CA P6 CHM1 Conservative 2.5%	LKHW01000063.1	5364	14685	+	99.68	78.96
NM_002847.4	5799	CA P6 CHM1 Conservative 2.5%	LKHW01000218.1	8542	611246	+	99.84	78.4
NM_002847.4	5799	CA P6 CHM1 Conservative 2.5%	LKHW01002331.1	773324	1191750	+	99.52	21.54
NM_130842.3	5799	CA P6 CHM1 Conservative 2.5%	LKHW01000218.1	8542	611246	+	99.84	79.23
NM_130842.3	5799	CA P6 CHM1 Conservative 2.5%	LKHW01002331.1	773324	1191750	+	99.49	20.71
NM_130843.3	5799	CA P6 CHM1 Conservative 2.5%	LKHW01000218.1	8542	611246	+	99.83	78
NM_130843.3	5799	CA P6 CHM1 Conservative 2.5%	LKHW01002331.1	773324	1191750	+	99.52	21.94
NM_001308267.1	5799	CA P6 CHM1 Conservative 2.5%	LKHW01000218.1	8542	611246	+	99.84	80.29
NM_001308267.1	5799	CA P6 CHM1 Conservative 2.5%	LKHW01002331.1	773324	1191750	+	99.46	19.66
NM_001308268.1	5799	CA P6 CHM1 Conservative 2.5%	LKHW01000218.1	8542	611246	+	99.84	76.72
NM_001308268.1	5799	CA P6 CHM1 Conservative 2.5%	LKHW01002331.1	819440	1191750	+	99.56	23.22
NM_001310154.1	400986	CA P6 CHM1 Conservative 2.5%	LKHW01002229.1	35102	121876	-	97.19	74.28
NM_001310154.1	400986	CA P6 CHM1 Conservative 2.5%	LKHW01000455.1	7605	29993	+	92.67	11.26
NM_001311200.1	1207	CA P6 CHM1 Conservative 2.5%	LKHW01000590.1	2033662	2051832	-	89.81	58.22
NM_001311201.1	1207	CA P6 CHM1 Conservative 2.5%	LKHW01000590.1	2033662	2034302	-	88.9	52.32
NM_001311202.1	1207	CA P6 CHM1 Conservative 2.5%	LKHW01000590.1	2033662	2034386	-	90.09	61.13
NM_198076.5	116228	CA P6 CHM1 Conservative 2.5%	LKHW01000004.1	859983	875212	-	83.65	13.48
NM_001312871.1	116228	CA P6 CHM1 Conservative 2.5%	LKHW01000004.1	859983	875212	-	83.65	14.12
NM_001312874.1	116228	CA P6 CHM1 Conservative 2.5%	LKHW01000004.1	859983	875212	-	82.77	15.18
NM_014717.2	9745	CA P6 CHM1 Conservative 2.5%	LKHW01001404.1	2439162	2462390	-	99.77	53.24
NM_014717.2	9745	CA P6 CHM1 Conservative 2.5%	LKHW01001254.1	14670	87974	-	99.57	47.36

## Sheet: FS_CHM1denovo_CHM1_1.1_GRCh38
#assembly_acc	protein_acc	NCBIGeneID	GeneSymbol	observation
GCA_001297185.1	NP_001182201.1	100129520	LOC100129520	FS
GCA_001297185.1	NP_001157929.1	100131980	ZNF705G	FS
GCA_001297185.1	NP_001297082.1	100133220	GOLGA6L3	FS
GCA_001297185.1	NP_001297084.1	100133301	FAM231B	FS
GCA_001297185.1	NP_001265516.1	100134391	LOC100134391	FS
GCA_001297185.1	NP_001124149.1	100170841	C17orf96	FS
GCA_001297185.1	NP_005466.1	10019	SH2B3	FS
GCA_001297185.1	NP_001243784.1	100287238	USP17L13	FS
GCA_001297185.1	NP_001243786.1	100287327	USP17L17	FS
GCA_001297185.1	NP_001136003.1	10044	SH2D3C	FS
GCA_001297185.1	NP_001136004.1	10044	SH2D3C	FS
GCA_001297185.1	NP_001136005.1	10044	SH2D3C	FS
GCA_001297185.1	NP_001136006.1	10044	SH2D3C	FS
GCA_001297185.1	NP_001239263.1	10044	SH2D3C	FS
GCA_001297185.1	NP_005480.2	10044	SH2D3C	FS
GCA_001297185.1	NP_733745.1	10044	SH2D3C	FS
GCA_001297185.1	NP_001170937.1	10046	MAMLD1	FS
GCA_001297185.1	NP_005482.2	10046	MAMLD1	FS
GCA_001297185.1	NP_057237.1	100506164	HSFX1	FS
GCA_001297185.1	NP_001229836.1	100506888	TCEB3CL2	FS
GCA_001297185.1	NP_001170990.1	100507436	MICA	FS
GCA_001297185.1	NP_001276081.1	100507436	MICA	FS
GCA_001297185.1	NP_001276082.1	100507436	MICA	FS
GCA_001297185.1	NP_001276083.1	100507436	MICA	FS
GCA_001297185.1	NP_001182188.1	100507588	TGFBR3L	FS
GCA_001297185.1	NP_001264352.1	100996648	TCP11X2	FS
GCA_001297185.1	NP_001278393.1	101060351	TBC1D3K	FS
GCA_001297185.1	NP_001263183.2	101180976	IFNL4	FS
GCA_001297185.1	NP_001269633.1	10130	PDIA6	FS
GCA_001297185.1	NP_001269634.1	10130	PDIA6	FS
GCA_001297185.1	NP_001269635.1	10130	PDIA6	FS
GCA_001297185.1	NP_001269636.1	10130	PDIA6	FS
GCA_001297185.1	NP_005733.1	10130	PDIA6	FS
GCA_001297185.1	NP_001191673.1	1014	CDH16	FS
GCA_001297185.1	NP_001191674.1	1014	CDH16	FS
GCA_001297185.1	NP_001191675.1	1014	CDH16	FS
GCA_001297185.1	NP_004053.1	1014	CDH16	FS
GCA_001297185.1	NP_001018003.1	10174	SORBS3	FS
GCA_001297185.1	NP_005766.3	10174	SORBS3	FS
GCA_001297185.1	NP_001006942.1	10195	ALG3	FS
GCA_001297185.1	NP_005874.1	10297	APC2	FS
GCA_001297185.1	NP_001239314.1	10318	TNIP1	FS
GCA_001297185.1	NP_001239315.1	10318	TNIP1	FS
GCA_001297185.1	NP_001239319.1	10318	TNIP1	FS
GCA_001297185.1	NP_001239320.1	10318	TNIP1	FS
GCA_001297185.1	NP_001239321.1	10318	TNIP1	FS
GCA_001297185.1	NP_001239322.1	10318	TNIP1	FS
GCA_001297185.1	NP_001245383.1	10318	TNIP1	FS
GCA_001297185.1	NP_006049.3	10318	TNIP1	FS
GCA_001297185.1	NP_006079.1	10383	TUBB4B	FS
GCA_001297185.1	NP_001166955.1	10529	NEBL	FS
GCA_001297185.1	NP_998734.1	10529	NEBL	FS
GCA_001297185.1	NP_001798.2	1056	CEL	FS
GCA_001297185.1	NP_001278805.1	10579	TACC2	FS
GCA_001297185.1	NP_001278806.1	10579	TACC2	FS
GCA_001297185.1	NP_001278807.1	10579	TACC2	FS
GCA_001297185.1	NP_008928.1	10579	TACC2	FS
GCA_001297185.1	NP_996742.1	10579	TACC2	FS
GCA_001297185.1	NP_996743.1	10579	TACC2	FS
GCA_001297185.1	NP_996744.3	10579	TACC2	FS
GCA_001297185.1	NP_001801.1	1059	CENPB	FS
GCA_001297185.1	NP_066189.3	10603	SH2B2	FS
GCA_001297185.1	NP_001265659.1	10634	GAS2L1	FS
GCA_001297185.1	NP_006469.2	10634	GAS2L1	FS
GCA_001297185.1	NP_689422.1	10634	GAS2L1	FS
GCA_001297185.1	NP_006471.2	10636	RGS14	FS
GCA_001297185.1	NP_006571.1	10686	CLDN16	FS
GCA_001297185.1	NP_109590.3	10743	RAI1	FS
GCA_001297185.1	NP_006603.2	10749	KIF1C	FS
GCA_001297185.1	NP_005707.1	10755	GIPC1	FS
GCA_001297185.1	NP_974197.1	10755	GIPC1	FS
GCA_001297185.1	NP_974199.1	10755	GIPC1	FS
GCA_001297185.1	NP_001284519.1	10849	CD3EAP	FS
GCA_001297185.1	NP_036231.1	10849	CD3EAP	FS
GCA_001297185.1	NP_001138297.1	10900	RUNDC3A	FS
GCA_001297185.1	NP_001138298.1	10900	RUNDC3A	FS
GCA_001297185.1	NP_006686.1	10900	RUNDC3A	FS
GCA_001297185.1	NP_001159583.1	10908	PNPLA6	FS
GCA_001297185.1	NP_001159584.1	10908	PNPLA6	FS
GCA_001297185.1	NP_001159585.1	10908	PNPLA6	FS
GCA_001297185.1	NP_001159586.1	10908	PNPLA6	FS
GCA_001297185.1	NP_006693.3	10908	PNPLA6	FS
GCA_001297185.1	NP_008968.4	11095	ADAMTS8	FS
GCA_001297185.1	NP_001258662.1	11223	MST1L	FS
GCA_001297185.1	NP_009155.1	11247	NXPH4	FS
GCA_001297185.1	NP_001012496.1	11338	U2AF2	FS
GCA_001297185.1	NP_009210.1	11338	U2AF2	FS
GCA_001297185.1	NP_000733.2	1135	CHRNA2	FS
GCA_001297185.1	NP_001269384.1	1135	CHRNA2	FS
GCA_001297185.1	NP_001096064.1	113878	DTX2	FS
GCA_001297185.1	NP_001096065.1	113878	DTX2	FS
GCA_001297185.1	NP_001096066.1	113878	DTX2	FS
GCA_001297185.1	NP_065943.2	113878	DTX2	FS
GCA_001297185.1	NP_001265354.1	114780	PKD1L2	FS
GCA_001297185.1	NP_443124.3	114780	PKD1L2	FS
GCA_001297185.1	NP_001073903.1	114783	LMTK3	FS
GCA_001297185.1	NP_443139.2	114795	TMEM132B	FS
GCA_001297185.1	NP_001271.1	1153	CIRBP	FS
GCA_001297185.1	NP_001287744.1	1153	CIRBP	FS
GCA_001297185.1	NP_001287758.1	1153	CIRBP	FS
GCA_001297185.1	NP_001166101.1	115703	ARHGAP33	FS
GCA_001297185.1	NP_443180.2	115703	ARHGAP33	FS
GCA_001297185.1	NP_619635.1	116444	GRIN3B	FS
GCA_001297185.1	NP_443198.1	116496	FAM129A	FS
GCA_001297185.1	NP_001035207.1	116985	ARAP1	FS
GCA_001297185.1	NP_001231817.1	116987	AGAP1	FS
GCA_001297185.1	NP_001036000.1	116988	AGAP3	FS
GCA_001297185.1	NP_001268229.1	116988	AGAP3	FS
GCA_001297185.1	NP_001295233.1	116988	AGAP3	FS
GCA_001297185.1	NP_001295234.1	116988	AGAP3	FS
GCA_001297185.1	NP_114152.3	116988	AGAP3	FS
GCA_001297185.1	NP_001002261.1	118813	ZFYVE27	FS
GCA_001297185.1	NP_001002262.1	118813	ZFYVE27	FS
GCA_001297185.1	NP_001167590.1	118813	ZFYVE27	FS
GCA_001297185.1	NP_001167591.1	118813	ZFYVE27	FS
GCA_001297185.1	NP_001167592.1	118813	ZFYVE27	FS
GCA_001297185.1	NP_001167593.1	118813	ZFYVE27	FS
GCA_001297185.1	NP_653189.3	118813	ZFYVE27	FS
GCA_001297185.1	NP_937791.2	119587	CPXM2	FS
GCA_001297185.1	NP_001229797.1	122060	SLAIN1	FS
GCA_001297185.1	NP_001004717.1	122742	OR4L1	FS
GCA_001297185.1	NP_001254650.1	124056	NOXO1	FS
GCA_001297185.1	NP_653204.1	124056	NOXO1	FS
GCA_001297185.1	NP_751907.1	124056	NOXO1	FS
GCA_001297185.1	NP_751908.1	124056	NOXO1	FS
GCA_001297185.1	NP_001153244.1	124583	CANT1	FS
GCA_001297185.1	NP_001153245.1	124583	CANT1	FS
GCA_001297185.1	NP_620148.1	124583	CANT1	FS
GCA_001297185.1	NP_703148.4	126206	NLRP5	FS
GCA_001297185.1	NP_001162597.1	126259	TMIGD2	FS
GCA_001297185.1	NP_001295161.1	126259	TMIGD2	FS
GCA_001297185.1	NP_653216.2	126259	TMIGD2	FS
GCA_001297185.1	NP_001004492.1	127623	OR2B11	FS
GCA_001297185.1	NP_001034589.2	127731	VWA5B1	FS
GCA_001297185.1	NP_001004478.1	128368	OR10Z1	FS
GCA_001297185.1	NP_001121637.1	129804	FBLN7	FS
GCA_001297185.1	NP_694946.2	129804	FBLN7	FS
GCA_001297185.1	NP_542410.2	1302	COL11A2	FS
GCA_001297185.1	NP_542411.2	1302	COL11A2	FS
GCA_001297185.1	NP_542412.2	1302	COL11A2	FS
GCA_001297185.1	NP_001073909.1	131149	OTOL1	FS
GCA_001297185.1	NP_001293.3	1325	CORT	FS
GCA_001297185.1	NP_819056.1	133060	OTOP1	FS
GCA_001297185.1	NP_689618.4	133746	JMY	FS
GCA_001297185.1	NP_000564.2	1378	CR1	FS
GCA_001297185.1	NP_001035500.1	138724	C9orf131	FS
GCA_001297185.1	NP_001035501.1	138724	C9orf131	FS
GCA_001297185.1	NP_001035502.1	138724	C9orf131	FS
GCA_001297185.1	NP_001274320.1	138724	C9orf131	FS
GCA_001297185.1	NP_976044.2	138724	C9orf131	FS
GCA_001297185.1	NP_001034671.3	139728	PNCK	FS
GCA_001297185.1	NP_001129212.1	139728	PNCK	FS
GCA_001297185.1	NP_001078.2	14	AAMP	FS
GCA_001297185.1	NP_001289474.1	14	AAMP	FS
GCA_001297185.1	NP_001277197.1	140876	FAM65C	FS
GCA_001297185.1	NP_543019.2	140876	FAM65C	FS
GCA_001297185.1	NP_001164157.1	142678	MIB2	FS
GCA_001297185.1	NP_001164158.1	142678	MIB2	FS
GCA_001297185.1	NP_001164159.1	142678	MIB2	FS
GCA_001297185.1	NP_001164160.1	142678	MIB2	FS
GCA_001297185.1	NP_543151.2	142678	MIB2	FS
GCA_001297185.1	NP_653264.1	143501	C11orf40	FS
GCA_001297185.1	NP_001155155.1	146183	OTOA	FS
GCA_001297185.1	NP_653273.3	146183	OTOA	FS
GCA_001297185.1	NP_733764.1	146183	OTOA	FS
GCA_001297185.1	NP_001129578.1	146227	BEAN1	FS
GCA_001297185.1	NP_001171491.1	146227	BEAN1	FS
GCA_001297185.1	NP_001076044.1	146713	RBFOX3	FS
GCA_001297185.1	NP_001251503.1	146909	KIF18B	FS
GCA_001297185.1	NP_001252506.1	146909	KIF18B	FS
GCA_001297185.1	NP_001002914.1	147040	KCTD11	FS
GCA_001297185.1	NP_001284553.1	147657	ZNF480	FS
GCA_001297185.1	NP_653285.2	147657	ZNF480	FS
GCA_001297185.1	NP_612143.2	148213	ZNF681	FS
GCA_001297185.1	NP_620169.1	150379	PNPLA5	FS
GCA_001297185.1	NP_955368.1	151313	FAHD2B	FS
GCA_001297185.1	NP_000674.2	152	ADRA2C	FS
GCA_001297185.1	NP_000097.3	1565	CYP2D6	FS
GCA_001297185.1	NP_001020332.2	1565	CYP2D6	FS
GCA_001297185.1	NP_659399.2	157310	PEBP4	FS
GCA_001297185.1	NP_001006939.2	158931	TCEAL6	FS
GCA_001297185.1	NP_001240679.1	160365	CLECL1	FS
GCA_001297185.1	NP_001254630.1	160365	CLECL1	FS
GCA_001297185.1	NP_742001.1	160365	CLECL1	FS
GCA_001297185.1	NP_714544.1	161497	STRC	FS
GCA_001297185.1	NP_570971.1	161725	OTUD7A	FS
GCA_001297185.1	NP_722520.2	161882	ZFPM1	FS
GCA_001297185.1	NP_001073331.1	1622	DBI	FS
GCA_001297185.1	NP_001073332.1	1622	DBI	FS
GCA_001297185.1	NP_001171488.1	1622	DBI	FS
GCA_001297185.1	NP_001171512.1	1622	DBI	FS
GCA_001297185.1	NP_001171513.1	1622	DBI	FS
GCA_001297185.1	NP_001171514.1	1622	DBI	FS
GCA_001297185.1	NP_001269562.1	1622	DBI	FS
GCA_001297185.1	NP_001269563.1	1622	DBI	FS
GCA_001297185.1	NP_001269564.1	1622	DBI	FS
GCA_001297185.1	NP_001269565.1	1622	DBI	FS
GCA_001297185.1	NP_065438.1	1622	DBI	FS
GCA_001297185.1	NP_694551.1	162417	NAGS	FS
GCA_001297185.1	NP_001914.3	1642	DDB1	FS
GCA_001297185.1	NP_001344.2	1645	AKR1C1	FS
GCA_001297185.1	NP_001092107.1	170394	PWWP2B	FS
GCA_001297185.1	NP_612508.3	170394	PWWP2B	FS
GCA_001297185.1	NP_056153.2	171023	ASXL1	FS
GCA_001297185.1	NP_001135935.1	1736	DKC1	FS
GCA_001297185.1	NP_001275676.1	1736	DKC1	FS
GCA_001297185.1	NP_001354.1	1736	DKC1	FS
GCA_001297185.1	NP_001007027.1	1822	ATN1	FS
GCA_001297185.1	NP_001931.2	1822	ATN1	FS
GCA_001297185.1	NP_004411.2	1850	DUSP8	FS
GCA_001297185.1	NP_932157.1	1912	PHC2	FS
GCA_001297185.1	NP_001032237.1	192668	CYS1	FS
GCA_001297185.1	NP_001398.2	1951	CELSR3	FS
GCA_001297185.1	NP_001399.1	1952	CELSR2	FS
GCA_001297185.1	NP_001400.3	1953	MEGF6	FS
GCA_001297185.1	NP_001258867.1	1954	MEGF8	FS
GCA_001297185.1	NP_001401.2	1954	MEGF8	FS
GCA_001297185.1	NP_001186809.1	1960	EGR3	FS
GCA_001297185.1	NP_001186810.1	1960	EGR3	FS
GCA_001297185.1	NP_004421.2	1960	EGR3	FS
GCA_001297185.1	NP_690875.1	196743	PAOX	FS
GCA_001297185.1	NP_997010.1	196743	PAOX	FS
GCA_001297185.1	NP_997011.1	196743	PAOX	FS
GCA_001297185.1	NP_001095133.3	200030	NBPF11	FS
GCA_001297185.1	NP_787048.1	200081	TXLNA	FS
GCA_001297185.1	NP_004426.2	2021	ENDOG	FS
GCA_001297185.1	NP_001966.1	2026	ENO2	FS
GCA_001297185.1	NP_001267723.2	2051	EPHB6	FS
GCA_001297185.1	NP_001267724.2	2051	EPHB6	FS
GCA_001297185.1	NP_004436.4	2051	EPHB6	FS
GCA_001297185.1	NP_001156619.1	2115	ETV1	FS
GCA_001297185.1	NP_001156620.1	2115	ETV1	FS
GCA_001297185.1	NP_001156621.1	2115	ETV1	FS
GCA_001297185.1	NP_001156622.1	2115	ETV1	FS
GCA_001297185.1	NP_001156623.1	2115	ETV1	FS
GCA_001297185.1	NP_004947.2	2115	ETV1	FS
GCA_001297185.1	NP_000024.2	215	ABCD1	FS
GCA_001297185.1	NP_004450.3	2186	BPTF	FS
GCA_001297185.1	NP_872579.2	2186	BPTF	FS
GCA_001297185.1	NP_660349.1	219738	C10orf35	FS
GCA_001297185.1	NP_001004019.1	2199	FBLN2	FS
GCA_001297185.1	NP_001158507.1	2199	FBLN2	FS
GCA_001297185.1	NP_001989.2	2199	FBLN2	FS
GCA_001297185.1	NP_878253.1	220032	GDPD4	FS
GCA_001297185.1	NP_001017986.1	2210	FCGR1B	FS
GCA_001297185.1	NP_001231839.1	2210	FCGR1B	FS
GCA_001297185.1	NP_001010924.1	221061	FAM171A1	FS
GCA_001297185.1	NP_001032242.1	221937	FOXK1	FS
GCA_001297185.1	NP_001136408.1	221955	DAGLB	FS
GCA_001297185.1	NP_631918.3	221955	DAGLB	FS
GCA_001297185.1	NP_001138740.1	222234	FAM185A	FS
GCA_001297185.1	NP_001138741.1	222234	FAM185A	FS
GCA_001297185.1	NP_001288090.1	222256	CDHR3	FS
GCA_001297185.1	NP_689963.2	222256	CDHR3	FS
GCA_001297185.1	NP_775836.3	222967	RSPH10B	FS
GCA_001297185.1	NP_004454.2	2245	FGD1	FS
GCA_001297185.1	NP_001093592.1	22904	SBNO2	FS
GCA_001297185.1	NP_036362.3	22932	POMZP3	FS
GCA_001297185.1	NP_036213.2	22936	ELL2	FS
GCA_001297185.1	NP_055786.1	22979	EFR3B	FS
GCA_001297185.1	NP_997188.2	2298	FOXD4	FS
GCA_001297185.1	NP_001243334.1	22992	KDM2A	FS
GCA_001297185.1	NP_036440.1	22992	KDM2A	FS
GCA_001297185.1	NP_001185879.1	23026	MYO16	FS
GCA_001297185.1	NP_055826.1	23026	MYO16	FS
GCA_001297185.1	NP_835260.2	23037	PDZD2	FS
GCA_001297185.1	NP_055907.3	23049	SMG1	FS
GCA_001297185.1	NP_055858.2	23061	TBC1D9B	FS
GCA_001297185.1	NP_942568.2	23061	TBC1D9B	FS
GCA_001297185.1	NP_055863.1	23067	SETD1B	FS
GCA_001297185.1	NP_001275656.1	23082	PPRC1	FS
GCA_001297185.1	NP_001275657.1	23082	PPRC1	FS
GCA_001297185.1	NP_055877.3	23082	PPRC1	FS
GCA_001297185.1	NP_001104595.1	23096	IQSEC2	FS
GCA_001297185.1	NP_055890.1	23096	IQSEC2	FS
GCA_001297185.1	NP_001155973.1	23112	TNRC6B	FS
GCA_001297185.1	NP_055903.2	23112	TNRC6B	FS
GCA_001297185.1	NP_569731.2	23117	NPIPB3	FS
GCA_001297185.1	NP_001073893.1	23135	KDM6B	FS
GCA_001297185.1	NP_001035529.1	23162	MAPK8IP3	FS
GCA_001297185.1	NP_055948.2	23162	MAPK8IP3	FS
GCA_001297185.1	NP_055951.2	23166	STAB1	FS
GCA_001297185.1	NP_001120959.1	2318	FLNC	FS
GCA_001297185.1	NP_001449.3	2318	FLNC	FS
GCA_001297185.1	NP_001138230.1	23187	PHLDB1	FS
GCA_001297185.1	NP_001138231.1	23187	PHLDB1	FS
GCA_001297185.1	NP_055972.1	23187	PHLDB1	FS
GCA_001297185.1	NP_055426.1	23195	MDN1	FS
GCA_001297185.1	NP_055983.1	23211	ZC3H4	FS
GCA_001297185.1	NP_055990.1	23218	NBEAL2	FS
GCA_001297185.1	NP_001274365.1	23242	COBL	FS
GCA_001297185.1	NP_001274367.1	23242	COBL	FS
GCA_001297185.1	NP_056013.2	23242	COBL	FS
GCA_001297185.1	NP_056025.2	23255	MTCL1	FS
GCA_001297185.1	NP_056044.3	23277	CLUH	FS
GCA_001297185.1	NP_056076.1	23310	NCAPD3	FS
GCA_001297185.1	NP_056082.2	23316	CUX2	FS
GCA_001297185.1	NP_056100.2	23335	WDR7	FS
GCA_001297185.1	NP_443066.2	23335	WDR7	FS
GCA_001297185.1	NP_056134.2	23371	TNS2	FS
GCA_001297185.1	NP_736610.2	23371	TNS2	FS
GCA_001297185.1	NP_938072.1	23371	TNS2	FS
GCA_001297185.1	NP_036417.1	23415	KCNH4	FS
GCA_001297185.1	NP_490597.1	23476	BRD4	FS
GCA_001297185.1	NP_036584.1	23495	TNFRSF13B	FS
GCA_001297185.1	NP_001188356.1	23500	DAAM2	FS
GCA_001297185.1	NP_056160.2	23500	DAAM2	FS
GCA_001297185.1	NP_056169.1	23511	NUP188	FS
GCA_001297185.1	NP_000795.2	2352	FOLR3	FS
GCA_001297185.1	NP_036507.2	23538	OR52A1	FS
GCA_001297185.1	NP_036583.2	23546	SYNGR4	FS
GCA_001297185.1	NP_001258570.1	23787	MTCH1	FS
GCA_001297185.1	NP_055156.1	23787	MTCH1	FS
GCA_001297185.1	NP_000688.2	239	ALOX12	FS
GCA_001297185.1	NP_001180197.1	24139	EML2	FS
GCA_001297185.1	NP_001269086.1	24140	FTSJ1	FS
GCA_001297185.1	NP_036412.1	24140	FTSJ1	FS
GCA_001297185.1	NP_803188.1	24140	FTSJ1	FS
GCA_001297185.1	NP_001162577.1	253725	FAM21C	FS
GCA_001297185.1	NP_001162578.1	253725	FAM21C	FS
GCA_001297185.1	NP_056077.2	253725	FAM21C	FS
GCA_001297185.1	NP_001092879.1	254102	EHBP1L1	FS
GCA_001297185.1	NP_862827.1	255877	BCL6B	FS
GCA_001297185.1	NP_001265227.1	256076	COL6A5	FS
GCA_001297185.1	NP_000804.1	2561	GABRB2	FS
GCA_001297185.1	NP_068711.1	2561	GABRB2	FS
GCA_001297185.1	NP_835455.1	256297	PTF1A	FS
GCA_001297185.1	NP_001287722.1	256364	EML3	FS
GCA_001297185.1	NP_001287723.1	256364	EML3	FS
GCA_001297185.1	NP_694997.2	256364	EML3	FS
GCA_001297185.1	NP_001004752.1	256892	OR51F1	FS
GCA_001297185.1	NP_001124487.1	25792	CIZ1	FS
GCA_001297185.1	NP_001124488.1	25792	CIZ1	FS
GCA_001297185.1	NP_001124489.1	25792	CIZ1	FS
GCA_001297185.1	NP_001124490.1	25792	CIZ1	FS
GCA_001297185.1	NP_001244904.1	25792	CIZ1	FS
GCA_001297185.1	NP_036259.2	25792	CIZ1	FS
GCA_001297185.1	NP_001278795.1	2590	GALNT2	FS
GCA_001297185.1	NP_004472.1	2590	GALNT2	FS
GCA_001297185.1	NP_671732.3	259249	MRGPRX1	FS
GCA_001297185.1	NP_001161750.1	25937	WWTR1	FS
GCA_001297185.1	NP_001161752.1	25937	WWTR1	FS
GCA_001297185.1	NP_056287.1	25937	WWTR1	FS
GCA_001297185.1	NP_001129663.1	25959	KANK2	FS
GCA_001297185.1	NP_056308.3	25959	KANK2	FS
GCA_001297185.1	NP_001139267.1	25970	SH2B1	FS
GCA_001297185.1	NP_001139268.1	25970	SH2B1	FS
GCA_001297185.1	NP_001139269.1	25970	SH2B1	FS
GCA_001297185.1	NP_001139284.1	25970	SH2B1	FS
GCA_001297185.1	NP_001295222.1	25970	SH2B1	FS
GCA_001297185.1	NP_056318.2	25970	SH2B1	FS
GCA_001297185.1	NP_001073906.1	25992	SNED1	FS
GCA_001297185.1	NP_056355.2	26015	RPAP1	FS
GCA_001297185.1	NP_001123582.1	26040	SETBP1	FS
GCA_001297185.1	NP_001035816.1	26095	PTPN20	FS
GCA_001297185.1	NP_001035817.1	26095	PTPN20	FS
GCA_001297185.1	NP_001035818.1	26095	PTPN20	FS
GCA_001297185.1	NP_001035820.1	26095	PTPN20	FS
GCA_001297185.1	NP_001035821.1	26095	PTPN20	FS
GCA_001297185.1	NP_056420.3	26095	PTPN20	FS
GCA_001297185.1	NP_056471.1	26153	KIF26A	FS
GCA_001297185.1	NP_056482.2	26165	SPATA31A7	FS
GCA_001297185.1	NP_036598.1	26526	TSPAN16	FS
GCA_001297185.1	NP_001483.3	2657	GDF1	FS
GCA_001297185.1	NP_001280220.1	26579	MYEOV	FS
GCA_001297185.1	NP_001280223.1	26579	MYEOV	FS
GCA_001297185.1	NP_001280225.1	26579	MYEOV	FS
GCA_001297185.1	NP_001287852.1	26579	MYEOV	FS
GCA_001297185.1	NP_001287853.1	26579	MYEOV	FS
GCA_001297185.1	NP_620123.2	26579	MYEOV	FS
GCA_001297185.1	NP_473448.1	26740	OR1J2	FS
GCA_001297185.1	NP_000470.2	268	AMH	FS
GCA_001297185.1	NP_001230402.1	27077	B9D1	FS
GCA_001297185.1	NP_001230404.1	27077	B9D1	FS
GCA_001297185.1	NP_056496.1	27077	B9D1	FS
GCA_001297185.1	NP_056509.2	27153	ZNF777	FS
GCA_001297185.1	NP_689627.1	27319	BHLHE22	FS
GCA_001297185.1	NP_065202.2	28	ABO	FS
GCA_001297185.1	NP_872363.1	283149	BCL9L	FS
GCA_001297185.1	NP_001263203.1	283232	TMEM80	FS
GCA_001297185.1	NP_115627.6	283234	CCDC88B	FS
GCA_001297185.1	NP_001128667.1	283375	SLC39A5	FS
GCA_001297185.1	NP_775867.2	283375	SLC39A5	FS
GCA_001297185.1	NP_775869.3	283455	KSR2	FS
GCA_001297185.1	NP_001106197.1	283638	CEP170B	FS
GCA_001297185.1	NP_055820.2	283638	CEP170B	FS
GCA_001297185.1	NP_001291317.1	283685	GOLGA6L2	FS
GCA_001297185.1	NP_001230467.1	283710	LOC283710	FS
GCA_001297185.1	NP_775882.2	283742	FAM98B	FS
GCA_001297185.1	NP_848611.2	283849	EXOC3L1	FS
GCA_001297185.1	NP_835464.1	284086	NEK8	FS
GCA_001297185.1	NP_001138422.1	284297	SSC5D	FS
GCA_001297185.1	NP_001182196.1	284297	SSC5D	FS
GCA_001297185.1	NP_954979.2	284338	PRR19	FS
GCA_001297185.1	NP_036447.1	284366	KLK9	FS
GCA_001297185.1	NP_848620.3	284382	ACTL9	FS
GCA_001297185.1	NP_001007526.3	284434	NWD1	FS
GCA_001297185.1	NP_001277284.1	284434	NWD1	FS
GCA_001297185.1	NP_001010881.1	284498	C1orf167	FS
GCA_001297185.1	NP_001276959.1	285141	ERICH2	FS
GCA_001297185.1	NP_001276960.1	285141	ERICH2	FS
GCA_001297185.1	NP_872394.2	285190	RGPD4	FS
GCA_001297185.1	NP_001243543.1	285242	HTR3E	FS
GCA_001297185.1	NP_872395.2	285242	HTR3E	FS
GCA_001297185.1	NP_938056.1	285242	HTR3E	FS
GCA_001297185.1	NP_001243825.1	285489	DOK7	FS
GCA_001297185.1	NP_001288000.1	285489	DOK7	FS
GCA_001297185.1	NP_775931.3	285489	DOK7	FS
GCA_001297185.1	NP_996763.1	285659	OR2V2	FS
GCA_001297185.1	NP_940888.2	285855	RPL7L1	FS
GCA_001297185.1	NP_001258085.2	286128	ZFP41	FS
GCA_001297185.1	NP_776193.2	286128	ZFP41	FS
GCA_001297185.1	NP_954586.4	286380	FOXD4L3	FS
GCA_001297185.1	NP_001078923.1	28964	GIT1	FS
GCA_001297185.1	NP_054749.2	28964	GIT1	FS
GCA_001297185.1	NP_001167455.1	29117	BRD7	FS
GCA_001297185.1	NP_037395.2	29117	BRD7	FS
GCA_001297185.1	NP_001030598.1	2976	GTF3C2	FS
GCA_001297185.1	NP_001512.1	2976	GTF3C2	FS
GCA_001297185.1	NP_055370.1	29850	TRPM5	FS
GCA_001297185.1	NP_001072982.1	29855	UBN1	FS
GCA_001297185.1	NP_001275585.1	29855	UBN1	FS
GCA_001297185.1	NP_001123543.1	29924	EPN1	FS
GCA_001297185.1	NP_001123544.1	29924	EPN1	FS
GCA_001297185.1	NP_037465.2	29924	EPN1	FS
GCA_001297185.1	NP_056526.3	29998	GLTSCR1	FS
GCA_001297185.1	NP_001091672.1	3090	HIC1	FS
GCA_001297185.1	NP_006488.2	3090	HIC1	FS
GCA_001297185.1	NP_005134.1	3240	HP	FS
GCA_001297185.1	NP_001231178.1	328	APEX1	FS
GCA_001297185.1	NP_001632.2	328	APEX1	FS
GCA_001297185.1	NP_542379.1	328	APEX1	FS
GCA_001297185.1	NP_542380.1	328	APEX1	FS
GCA_001297185.1	NP_001035757.1	3299	HSF4	FS
GCA_001297185.1	NP_001529.2	3299	HSF4	FS
GCA_001297185.1	NP_853643.1	337973	KRTAP19-6	FS
GCA_001297185.1	NP_001005920.2	339123	JMJD8	FS
GCA_001297185.1	NP_001012661.1	339344	MYPOP	FS
GCA_001297185.1	NP_998769.2	339366	ADAMTSL5	FS
GCA_001297185.1	NP_001012301.1	340075	ARSI	FS
GCA_001297185.1	NP_001019626.1	340526	RGAG4	FS
GCA_001297185.1	NP_955631.1	340719	NANOS1	FS
GCA_001297185.1	NP_997244.4	341640	FREM2	FS
GCA_001297185.1	NP_001123292.1	342618	SLFN14	FS
GCA_001297185.1	NP_001013652.1	343066	AADACL4	FS
GCA_001297185.1	NP_001001957.2	343171	OR2W3	FS
GCA_001297185.1	NP_001033794.1	344758	GPR149	FS
GCA_001297185.1	NP_001008784.2	344807	CD200R1L	FS
GCA_001297185.1	NP_001186144.1	344807	CD200R1L	FS
GCA_001297185.1	NP_001099046.1	347454	SOWAHD	FS
GCA_001297185.1	NP_001240764.1	3490	IGFBP7	FS
GCA_001297185.1	NP_001544.1	3490	IGFBP7	FS
GCA_001297185.1	NP_954714.2	349334	FOXD4L4	FS
GCA_001297185.1	NP_002171.2	3508	IGHMBP2	FS
GCA_001297185.1	NP_000632.1	3589	IL11	FS
GCA_001297185.1	NP_001254647.1	3589	IL11	FS
GCA_001297185.1	NP_001020413.1	3654	IRAK1	FS
GCA_001297185.1	NP_001020414.1	3654	IRAK1	FS
GCA_001297185.1	NP_001560.2	3654	IRAK1	FS
GCA_001297185.1	NP_001162.4	368	ABCC6	FS
GCA_001297185.1	NP_001107852.1	3683	ITGAL	FS
GCA_001297185.1	NP_002200.2	3683	ITGAL	FS
GCA_001297185.1	NP_002217.3	3714	JAG2	FS
GCA_001297185.1	NP_660142.1	3714	JAG2	FS
GCA_001297185.1	NP_002218.2	3716	JAK1	FS
GCA_001297185.1	NP_001253969.1	3720	JARID2	FS
GCA_001297185.1	NP_004964.2	3720	JARID2	FS
GCA_001297185.1	NP_001269469.1	374286	CDRT1	FS
GCA_001297185.1	NP_006373.2	374286	CDRT1	FS
GCA_001297185.1	NP_940927.2	374654	KIF7	FS
GCA_001297185.1	NP_955373.3	374920	C19orf68	FS
GCA_001297185.1	NP_001292204.1	375790	AGRN	FS
GCA_001297185.1	NP_940978.2	375790	AGRN	FS
GCA_001297185.1	NP_945352.3	375791	CYSRT1	FS
GCA_001297185.1	NP_000516.3	3767	KCNJ11	FS
GCA_001297185.1	NP_001159762.1	3767	KCNJ11	FS
GCA_001297185.1	NP_958804.2	377630	USP17L2	FS
GCA_001297185.1	NP_002246.5	3805	KIR2DL4	FS
GCA_001297185.1	NP_036446.3	3809	KIR2DS4	FS
GCA_001297185.1	NP_001005922.1	387264	KRTAP5-1	FS
GCA_001297185.1	NP_001010896.2	387638	C10orf113	FS
GCA_001297185.1	NP_001170954.1	387638	C10orf113	FS
GCA_001297185.1	NP_001005751.1	387680	FAM21A	FS
GCA_001297185.1	NP_001278327.1	387680	FAM21A	FS
GCA_001297185.1	NP_001166932.1	388336	SHISA6	FS
GCA_001297185.1	NP_001166933.1	388336	SHISA6	FS
GCA_001297185.1	NP_997269.2	388336	SHISA6	FS
GCA_001297185.1	NP_982283.2	388677	NOTCH2NL	FS
GCA_001297185.1	NP_001025054.1	388939	C2orf71	FS
GCA_001297185.1	NP_001138668.1	389730	SPATA31A6	FS
GCA_001297185.1	NP_001004754.1	390064	OR51I2	FS
GCA_001297185.1	NP_001005183.1	390326	OR6C76	FS
GCA_001297185.1	NP_001005503.1	390439	OR11G2	FS
GCA_001297185.1	NP_001093320.2	391003	PRAMEF18	FS
GCA_001297185.1	NP_001035257.1	3955	LFNG	FS
GCA_001297185.1	NP_001035258.1	3955	LFNG	FS
GCA_001297185.1	NP_001159827.1	3955	LFNG	FS
GCA_001297185.1	NP_001288171.1	396	ARHGDIA	FS
GCA_001297185.1	NP_001193556.1	399939	TRIM49D1	FS
GCA_001297185.1	NP_001123250.1	400581	GRAPL	FS
GCA_001297185.1	NP_001138906.1	400713	ZNF880	FS
GCA_001297185.1	NP_001032764.2	400818	NBPF9	FS
GCA_001297185.1	NP_001264373.1	400818	NBPF9	FS
GCA_001297185.1	NP_001019628.3	400966	RGPD1	FS
GCA_001297185.1	NP_001167617.1	4010	LMX1B	FS
GCA_001297185.1	NP_001167618.1	4010	LMX1B	FS
GCA_001297185.1	NP_002307.2	4010	LMX1B	FS
GCA_001297185.1	NP_775922.2	401024	FSIP2	FS
GCA_001297185.1	NP_001269430.1	4101	MAGEA2	FS
GCA_001297185.1	NP_001269431.1	4101	MAGEA2	FS
GCA_001297185.1	NP_001269433.1	4101	MAGEA2	FS
GCA_001297185.1	NP_001269434.1	4101	MAGEA2	FS
GCA_001297185.1	NP_005352.1	4101	MAGEA2	FS
GCA_001297185.1	NP_786884.1	4101	MAGEA2	FS
GCA_001297185.1	NP_786885.1	4101	MAGEA2	FS
GCA_001297185.1	NP_001011543.2	4109	MAGEA10	FS
GCA_001297185.1	NP_001238757.1	4109	MAGEA10	FS
GCA_001297185.1	NP_066386.2	4109	MAGEA10	FS
GCA_001297185.1	NP_002364.5	4130	MAP1A	FS
GCA_001297185.1	NP_001071133.2	414189	AGAP6	FS
GCA_001297185.1	NP_002369.2	4145	MATK	FS
GCA_001297185.1	NP_647611.1	4145	MATK	FS
GCA_001297185.1	NP_647612.1	4145	MATK	FS
GCA_001297185.1	NP_006730.2	4174	MCM5	FS
GCA_001297185.1	NP_002410.1	4296	MAP3K11	FS
GCA_001297185.1	NP_001184033.1	4297	KMT2A	FS
GCA_001297185.1	NP_005924.2	4297	KMT2A	FS
GCA_001297185.1	NP_004985.2	4318	MMP9	FS
GCA_001297185.1	NP_002421.3	4330	MN1	FS
GCA_001297185.1	NP_064706.1	4335	MNT	FS
GCA_001297185.1	NP_001014440.2	440836	ODF3B	FS
GCA_001297185.1	NP_001005504.1	441308	OR4F21	FS
GCA_001297185.1	NP_001138596.1	441452	SPATA31C1	FS
GCA_001297185.1	NP_001005243.1	441639	OR9K2	FS
GCA_001297185.1	NP_001138682.1	441869	ANKRD65	FS
GCA_001297185.1	NP_001077007.1	445582	POTEE	FS
GCA_001297185.1	NP_036467.2	4542	MYO1F	FS
GCA_001297185.1	NP_005951.1	4584	MUC3A	FS
GCA_001297185.1	NP_001158238.1	463	ZFHX3	FS
GCA_001297185.1	NP_008816.3	463	ZFHX3	FS
GCA_001297185.1	NP_001120651.2	4647	MYO7A	FS
GCA_001297185.1	NP_001123537.1	4650	MYO9B	FS
GCA_001297185.1	NP_004136.2	4650	MYO9B	FS
GCA_001297185.1	NP_001129494.1	4776	NFATC4	FS
GCA_001297185.1	NP_001185894.1	4776	NFATC4	FS
GCA_001297185.1	NP_001185895.1	4776	NFATC4	FS
GCA_001297185.1	NP_001185896.1	4776	NFATC4	FS
GCA_001297185.1	NP_001275731.1	4776	NFATC4	FS
GCA_001297185.1	NP_004545.2	4776	NFATC4	FS
GCA_001297185.1	NP_001231931.1	4782	NFIC	FS
GCA_001297185.1	NP_001231933.1	4782	NFIC	FS
GCA_001297185.1	NP_001231934.1	4782	NFIC	FS
GCA_001297185.1	NP_005588.2	4782	NFIC	FS
GCA_001297185.1	NP_995315.1	4782	NFIC	FS
GCA_001297185.1	NP_005589.1	4807	NHLH1	FS
GCA_001297185.1	NP_055331.1	4849	CNOT3	FS
GCA_001297185.1	NP_000426.2	4854	NOTCH3	FS
GCA_001297185.1	NP_004548.3	4855	NOTCH4	FS
GCA_001297185.1	NP_000262.2	4864	NPC1	FS
GCA_001297185.1	NP_004550.2	4904	YBX1	FS
GCA_001297185.1	NP_001273490.1	4926	NUMA1	FS
GCA_001297185.1	NP_006176.2	4926	NUMA1	FS
GCA_001297185.1	NP_002538.1	4983	OPHN1	FS
GCA_001297185.1	NP_001191448.1	5026	P2RX5	FS
GCA_001297185.1	NP_002552.2	5026	P2RX5	FS
GCA_001297185.1	NP_001120679.1	50485	SMARCAL1	FS
GCA_001297185.1	NP_054859.2	50485	SMARCAL1	FS
GCA_001297185.1	NP_056534.2	50509	COL5A3	FS
GCA_001297185.1	NP_002568.2	5062	PAK2	FS
GCA_001297185.1	NP_001001891.2	50636	ANO7	FS
GCA_001297185.1	NP_002574.2	5074	PAWR	FS
GCA_001297185.1	NP_002581.2	5100	PCDH8	FS
GCA_001297185.1	NP_116569.1	51085	MLXIPL	FS
GCA_001297185.1	NP_116570.1	51085	MLXIPL	FS
GCA_001297185.1	NP_116571.1	51085	MLXIPL	FS
GCA_001297185.1	NP_116572.1	51085	MLXIPL	FS
GCA_001297185.1	NP_057066.2	51087	YBX2	FS
GCA_001297185.1	NP_001291651.1	51177	PLEKHO1	FS
GCA_001297185.1	NP_001291652.1	51177	PLEKHO1	FS
GCA_001297185.1	NP_001291653.1	51177	PLEKHO1	FS
GCA_001297185.1	NP_057358.2	51177	PLEKHO1	FS
GCA_001297185.1	NP_057652.1	51289	RXFP3	FS
GCA_001297185.1	NP_001095272.1	51317	PHF21A	FS
GCA_001297185.1	NP_057705.3	51317	PHF21A	FS
GCA_001297185.1	NP_005009.2	5133	PDCD1	FS
GCA_001297185.1	NP_001257694.1	51363	CHST15	FS
GCA_001297185.1	NP_055678.2	51363	CHST15	FS
GCA_001297185.1	NP_001193964.1	51513	ETV7	FS
GCA_001297185.1	NP_001193965.1	51513	ETV7	FS
GCA_001297185.1	NP_001193966.1	51513	ETV7	FS
GCA_001297185.1	NP_001193967.1	51513	ETV7	FS
GCA_001297185.1	NP_001193968.1	51513	ETV7	FS
GCA_001297185.1	NP_001193969.1	51513	ETV7	FS
GCA_001297185.1	NP_057219.1	51513	ETV7	FS
GCA_001297185.1	NP_001026871.1	51559	NT5DC3	FS
GCA_001297185.1	NP_001137252.1	51629	SLC25A39	FS
GCA_001297185.1	NP_057100.1	51629	SLC25A39	FS
GCA_001297185.1	NP_001188254.1	5174	PDZK1	FS
GCA_001297185.1	NP_001188255.1	5174	PDZK1	FS
GCA_001297185.1	NP_002605.2	5174	PDZK1	FS
GCA_001297185.1	NP_001036054.1	51754	TMEM8B	FS
GCA_001297185.1	NP_001036055.1	51754	TMEM8B	FS
GCA_001297185.1	NP_057530.2	51754	TMEM8B	FS
GCA_001297185.1	NP_068800.2	5239	PGM5	FS
GCA_001297185.1	NP_005018.1	5296	PIK3R2	FS
GCA_001297185.1	NP_683878.1	53354	PANK1	FS
GCA_001297185.1	NP_115618.3	5361	PLXNA1	FS
GCA_001297185.1	NP_001165439.1	53841	CDHR5	FS
GCA_001297185.1	NP_068743.2	53841	CDHR5	FS
GCA_001297185.1	NP_112554.2	53841	CDHR5	FS
GCA_001297185.1	NP_005387.2	5408	PNLIPRP2	FS
GCA_001297185.1	NP_061859.3	54436	SH3TC1	FS
GCA_001297185.1	NP_002690.3	5453	POU3F1	FS
GCA_001297185.1	NP_061927.2	54537	FAM35A	FS
GCA_001297185.1	NP_005595.2	5454	POU3F2	FS
GCA_001297185.1	NP_060031.1	54754	NUTM2F	FS
GCA_001297185.1	NP_001136024.1	54798	DCHS2	FS
GCA_001297185.1	NP_001287875.1	54815	GATAD2A	FS
GCA_001297185.1	NP_060130.3	54815	GATAD2A	FS
GCA_001297185.1	NP_056405.2	54865	GPATCH4	FS
GCA_001297185.1	NP_872620.1	54865	GPATCH4	FS
GCA_001297185.1	NP_060200.2	54870	QRICH1	FS
GCA_001297185.1	NP_942581.1	54870	QRICH1	FS
GCA_001297185.1	NP_001073312.1	54897	CASZ1	FS
GCA_001297185.1	NP_002696.3	5493	PPL	FS
GCA_001297185.1	NP_060361.4	54991	C1orf159	FS
GCA_001297185.1	NP_001230271.1	55036	CCDC40	FS
GCA_001297185.1	NP_060460.4	55066	PDPR	FS
GCA_001297185.1	NP_060478.3	55079	FEZF2	FS
GCA_001297185.1	NP_060483.3	55084	SOBP	FS
GCA_001297185.1	NP_054829.2	5511	PPP1R8	FS
GCA_001297185.1	NP_001135825.1	5532	PPP3CB	FS
GCA_001297185.1	NP_001135826.1	5532	PPP3CB	FS
GCA_001297185.1	NP_001276897.1	5532	PPP3CB	FS
GCA_001297185.1	NP_066955.1	5532	PPP3CB	FS
GCA_001297185.1	NP_001265723.1	5540	NPY4R	FS
GCA_001297185.1	NP_005963.4	5540	NPY4R	FS
GCA_001297185.1	NP_006240.4	5544	PRB3	FS
GCA_001297185.1	NP_001164554.1	55627	SMPD4	FS
GCA_001297185.1	NP_060221.2	55627	SMPD4	FS
GCA_001297185.1	NP_060421.2	55627	SMPD4	FS
GCA_001297185.1	NP_001273294.1	55700	MAP7D1	FS
GCA_001297185.1	NP_001273295.1	55700	MAP7D1	FS
GCA_001297185.1	NP_060537.3	55700	MAP7D1	FS
GCA_001297185.1	NP_060868.2	55799	CACNA2D3	FS
GCA_001297185.1	NP_001265528.1	558	AXL	FS
GCA_001297185.1	NP_001690.2	558	AXL	FS
GCA_001297185.1	NP_068713.2	558	AXL	FS
GCA_001297185.1	NP_001263318.1	55857	KIZ	FS
GCA_001297185.1	NP_061130.1	55893	ZNF395	FS
GCA_001297185.1	NP_001075109.1	5591	PRKDC	FS
GCA_001297185.1	NP_008835.5	5591	PRKDC	FS
GCA_001297185.1	NP_001303261.1	5606	MAP2K3	FS
GCA_001297185.1	NP_002747.2	5606	MAP2K3	FS
GCA_001297185.1	NP_659731.1	5606	MAP2K3	FS
GCA_001297185.1	NP_061720.2	56171	DNAH7	FS
GCA_001297185.1	NP_062552.2	56257	MEPCE	FS
GCA_001297185.1	NP_001153772.1	56666	PANX2	FS
GCA_001297185.1	NP_443071.2	56666	PANX2	FS
GCA_001297185.1	NP_064594.3	56961	SHD	FS
GCA_001297185.1	NP_064630.2	56995	TULP4	FS
GCA_001297185.1	NP_064632.2	56997	ADCK3	FS
GCA_001297185.1	NP_001287824.1	57010	CABP4	FS
GCA_001297185.1	NP_001287825.1	57010	CABP4	FS
GCA_001297185.1	NP_660201.1	57010	CABP4	FS
GCA_001297185.1	NP_001188505.1	57048	PLSCR3	FS
GCA_001297185.1	NP_065093.2	57048	PLSCR3	FS
GCA_001297185.1	NP_065137.1	57124	CD248	FS
GCA_001297185.1	NP_001243324.1	57127	RHBG	FS
GCA_001297185.1	NP_001243325.1	57127	RHBG	FS
GCA_001297185.1	NP_065140.3	57127	RHBG	FS
GCA_001297185.1	NP_065768.2	57477	SHROOM4	FS
GCA_001297185.1	NP_001693.2	575	ADGRB1	FS
GCA_001297185.1	NP_065831.1	57540	PTCHD2	FS
GCA_001297185.1	NP_056056.2	57553	MICAL3	FS
GCA_001297185.1	NP_065846.1	57555	NLGN2	FS
GCA_001297185.1	NP_065863.2	57572	DOCK6	FS
GCA_001297185.1	NP_001099001.1	57579	FAM135A	FS
GCA_001297185.1	NP_001156001.1	57579	FAM135A	FS
GCA_001297185.1	NP_065870.3	57579	FAM135A	FS
GCA_001297185.1	NP_001278253.1	57597	BAHCC1	FS
GCA_001297185.1	NP_065899.1	57608	KIAA1462	FS
GCA_001297185.1	NP_065948.1	57657	HCN3	FS
GCA_001297185.1	NP_001122305.1	57659	ZBTB4	FS
GCA_001297185.1	NP_065950.2	57659	ZBTB4	FS
GCA_001297185.1	NP_001136113.1	57666	FBRSL1	FS
GCA_001297185.1	NP_065983.1	57692	MAGEE1	FS
GCA_001297185.1	NP_001032895.2	57701	NCKAP5L	FS
GCA_001297185.1	NP_066010.1	57719	ANO8	FS
GCA_001297185.1	NP_079466.3	57730	ANKRD36B	FS
GCA_001297185.1	NP_001186726.1	5778	PTPN7	FS
GCA_001297185.1	NP_002823.3	5778	PTPN7	FS
GCA_001297185.1	NP_542155.1	5778	PTPN7	FS
GCA_001297185.1	NP_001193767.1	5803	PTPRZ1	FS
GCA_001297185.1	NP_001193768.1	5803	PTPRZ1	FS
GCA_001297185.1	NP_002842.2	5803	PTPRZ1	FS
GCA_001297185.1	NP_001074324.1	5829	PXN	FS
GCA_001297185.1	NP_001230685.1	5829	PXN	FS
GCA_001297185.1	NP_002850.2	5829	PXN	FS
GCA_001297185.1	NP_067047.4	58499	ZNF462	FS
GCA_001297185.1	NP_067051.2	58506	SCAF1	FS
GCA_001297185.1	NP_000955.1	5914	RARA	FS
GCA_001297185.1	NP_001138773.1	5914	RARA	FS
GCA_001297185.1	NP_001138774.1	5914	RARA	FS
GCA_001297185.1	NP_114101.4	59283	CACNG8	FS
GCA_001297185.1	NP_000529.1	5994	RFXAP	FS
GCA_001297185.1	NP_002917.1	6002	RGS12	FS
GCA_001297185.1	NP_937870.1	6002	RGS12	FS
GCA_001297185.1	NP_937872.1	6002	RGS12	FS
GCA_001297185.1	NP_002930.2	6050	RNH1	FS
GCA_001297185.1	NP_976317.1	6050	RNH1	FS
GCA_001297185.1	NP_976318.1	6050	RNH1	FS
GCA_001297185.1	NP_976319.1	6050	RNH1	FS
GCA_001297185.1	NP_976320.1	6050	RNH1	FS
GCA_001297185.1	NP_976321.1	6050	RNH1	FS
GCA_001297185.1	NP_976322.1	6050	RNH1	FS
GCA_001297185.1	NP_976323.1	6050	RNH1	FS
GCA_001297185.1	NP_001030584.1	60509	AGBL5	FS
GCA_001297185.1	NP_068603.4	60509	AGBL5	FS
GCA_001297185.1	NP_064714.2	60676	PAPPA2	FS
GCA_001297185.1	NP_000318.1	6094	ROM1	FS
GCA_001297185.1	NP_001185.3	610	HCN2	FS
GCA_001297185.1	NP_001030025.1	6103	RPGR	FS
GCA_001297185.1	NP_000531.2	6261	RYR1	FS
GCA_001297185.1	NP_001036188.1	6261	RYR1	FS
GCA_001297185.1	NP_001171701.1	63035	BCORL1	FS
GCA_001297185.1	NP_068765.3	63035	BCORL1	FS
GCA_001297185.1	NP_071349.3	63893	UBE2O	FS
GCA_001297185.1	NP_071375.1	63922	CHTF18	FS
GCA_001297185.1	NP_071398.3	63977	PRDM15	FS
GCA_001297185.1	NP_071765.2	64221	ROBO3	FS
GCA_001297185.1	NP_001177739.1	642517	AGAP9	FS
GCA_001297185.1	NP_001137447.1	642623	UBTFL1	FS
GCA_001297185.1	NP_001073983.1	642658	SCX	FS
GCA_001297185.1	NP_001098549.2	64319	FBRS	FS
GCA_001297185.1	NP_001269423.1	643699	GOLGA8N	FS
GCA_001297185.1	NP_071926.4	64411	ARAP3	FS
GCA_001297185.1	NP_000014.1	6442	SGCA	FS
GCA_001297185.1	NP_001129169.1	6442	SGCA	FS
GCA_001297185.1	NP_001265641.1	64422	ATG3	FS
GCA_001297185.1	NP_001129624.1	644974	ALG1L2	FS
GCA_001297185.1	NP_001091879.1	645073	GAGE12G	FS
GCA_001297185.1	NP_001139327.1	6452	SH3BP2	FS
GCA_001297185.1	NP_001123512.1	6464	SHC1	FS
GCA_001297185.1	NP_001123513.1	6464	SHC1	FS
GCA_001297185.1	NP_001189788.1	6464	SHC1	FS
GCA_001297185.1	NP_003020.2	6464	SHC1	FS
GCA_001297185.1	NP_892113.4	6464	SHC1	FS
GCA_001297185.1	NP_001164106.1	64748	PLPPR2	FS
GCA_001297185.1	NP_073574.2	64748	PLPPR2	FS
GCA_001297185.1	NP_073610.2	64788	LMF1	FS
GCA_001297185.1	NP_001127703.1	64943	NT5DC2	FS
GCA_001297185.1	NP_075059.1	64943	NT5DC2	FS
GCA_001297185.1	NP_075060.1	64946	CENPH	FS
GCA_001297185.1	NP_998820.3	65125	WNK1	FS
GCA_001297185.1	NP_001035.1	6531	SLC6A3	FS
GCA_001297185.1	NP_001137355.1	653505	PPIAL4A	FS
GCA_001297185.1	NP_001138696.1	653643	GOLGA6D	FS
GCA_001297185.1	NP_001264012.1	653781	POTEJ	FS
GCA_001297185.1	NP_001177926.1	6540	SLC6A13	FS
GCA_001297185.1	NP_057699.2	6540	SLC6A13	FS
GCA_001297185.1	NP_005621.2	6578	SLCO2A1	FS
GCA_001297185.1	NP_075556.1	6614	SIGLEC1	FS
GCA_001297185.1	NP_005623.1	6650	CAPN15	FS
GCA_001297185.1	NP_001278341.1	6651	SON	FS
GCA_001297185.1	NP_620305.2	6651	SON	FS
GCA_001297185.1	NP_001042.1	6753	SSTR3	FS
GCA_001297185.1	NP_001265616.1	6753	SSTR3	FS
GCA_001297185.1	NP_001259025.1	6810	STX4	FS
GCA_001297185.1	NP_003165.2	6840	SVIL	FS
GCA_001297185.1	NP_068506.2	6840	SVIL	FS
GCA_001297185.1	NP_055047.2	6844	VAMP2	FS
GCA_001297185.1	NP_008881.2	6853	SYN1	FS
GCA_001297185.1	NP_598006.1	6853	SYN1	FS
GCA_001297185.1	NP_001132938.1	6907	TBL1X	FS
GCA_001297185.1	NP_001132939.1	6907	TBL1X	FS
GCA_001297185.1	NP_001132940.1	6907	TBL1X	FS
GCA_001297185.1	NP_005638.1	6907	TBL1X	FS
GCA_001297185.1	NP_004599.2	6911	TBX6	FS
GCA_001297185.1	NP_733796.2	7050	TGIF1	FS
GCA_001297185.1	NP_003250.3	7087	ICAM5	FS
GCA_001297185.1	NP_057075.1	712	C1QA	FS
GCA_001297185.1	NP_061978.6	7148	TNXB	FS
GCA_001297185.1	NP_000537.3	7157	TP53	FS
GCA_001297185.1	NP_001119584.1	7157	TP53	FS
GCA_001297185.1	NP_001119585.1	7157	TP53	FS
GCA_001297185.1	NP_001119586.1	7157	TP53	FS
GCA_001297185.1	NP_001119590.1	7157	TP53	FS
GCA_001297185.1	NP_001263624.1	7157	TP53	FS
GCA_001297185.1	NP_001263625.1	7157	TP53	FS
GCA_001297185.1	NP_001263689.1	7157	TP53	FS
GCA_001297185.1	NP_001263690.1	7157	TP53	FS
GCA_001297185.1	NP_001277153.1	7179	TPTE	FS
GCA_001297185.1	NP_954868.1	7179	TPTE	FS
GCA_001297185.1	NP_954869.1	7179	TPTE	FS
GCA_001297185.1	NP_954870.2	7179	TPTE	FS
GCA_001297185.1	NP_001243779.1	7273	TTN	FS
GCA_001297185.1	NP_001254479.2	7273	TTN	FS
GCA_001297185.1	NP_003310.4	7273	TTN	FS
GCA_001297185.1	NP_596869.4	7273	TTN	FS
GCA_001297185.1	NP_597676.3	7273	TTN	FS
GCA_001297185.1	NP_597681.4	7273	TTN	FS
GCA_001297185.1	NP_112587.2	727800	RNF208	FS
GCA_001297185.1	NP_002449.2	727897	MUC5B	FS
GCA_001297185.1	NP_001093155.1	727940	RHOXF2B	FS
GCA_001297185.1	NP_001092808.1	728118	NUTM2A	FS
GCA_001297185.1	NP_001138720.1	728262	FAM157A	FS
GCA_001297185.1	NP_001229256.1	728369	USP17L24	FS
GCA_001297185.1	NP_001155843.1	728392	LOC728392	FS
GCA_001297185.1	NP_001265424.1	729262	NUTM2B	FS
GCA_001297185.1	NP_001120684.1	729447	GAGE2A	FS
GCA_001297185.1	NP_001297067.1	729587	FAM231C	FS
GCA_001297185.1	NP_001139682.2	729597	SPDYE6	FS
GCA_001297185.1	NP_001116863.3	729873	TBC1D3	FS
GCA_001297185.1	NP_001268645.1	7314	UBB	FS
GCA_001297185.1	NP_001268646.1	7314	UBB	FS
GCA_001297185.1	NP_001268647.1	7314	UBB	FS
GCA_001297185.1	NP_001268648.1	7314	UBB	FS
GCA_001297185.1	NP_001268649.1	7314	UBB	FS
GCA_001297185.1	NP_061828.1	7314	UBB	FS
GCA_001297185.1	NP_006286.1	7407	VARS	FS
GCA_001297185.1	NP_001120864.1	745	MYRF	FS
GCA_001297185.1	NP_037411.1	745	MYRF	FS
GCA_001297185.1	NP_003377.2	7455	ZAN	FS
GCA_001297185.1	NP_775082.2	7455	ZAN	FS
GCA_001297185.1	NP_003384.2	7479	WNT8B	FS
GCA_001297185.1	NP_004330.1	754	PTTG1IP	FS
GCA_001297185.1	NP_001171555.1	7543	ZFX	FS
GCA_001297185.1	NP_001171556.1	7543	ZFX	FS
GCA_001297185.1	NP_001171557.1	7543	ZFX	FS
GCA_001297185.1	NP_003401.2	7543	ZFX	FS
GCA_001297185.1	NP_005655.1	7681	MKRN3	FS
GCA_001297185.1	NP_000059.3	773	CACNA1A	FS
GCA_001297185.1	NP_001120693.1	773	CACNA1A	FS
GCA_001297185.1	NP_001120694.1	773	CACNA1A	FS
GCA_001297185.1	NP_001167551.1	773	CACNA1A	FS
GCA_001297185.1	NP_075461.2	773	CACNA1A	FS
GCA_001297185.1	NP_003450.2	7781	SLC30A3	FS
GCA_001297185.1	NP_000718.1	786	CACNG1	FS
GCA_001297185.1	NP_077284.2	79154	DHRS11	FS
GCA_001297185.1	NP_004629.3	7916	PRRC2A	FS
GCA_001297185.1	NP_542417.2	7916	PRRC2A	FS
GCA_001297185.1	NP_001186166.1	7918	GPANK1	FS
GCA_001297185.1	NP_001186167.1	7918	GPANK1	FS
GCA_001297185.1	NP_001186168.1	7918	GPANK1	FS
GCA_001297185.1	NP_001186169.1	7918	GPANK1	FS
GCA_001297185.1	NP_149417.1	7918	GPANK1	FS
GCA_001297185.1	NP_001184216.1	79334	OR11H2	FS
GCA_001297185.1	NP_001035743.1	79364	ZXDC	FS
GCA_001297185.1	NP_079388.3	79364	ZXDC	FS
GCA_001297185.1	NP_001171708.1	79400	NOX5	FS
GCA_001297185.1	NP_001171709.1	79400	NOX5	FS
GCA_001297185.1	NP_078781.3	79400	NOX5	FS
GCA_001297185.1	NP_001001913.1	79473	OR52N1	FS
GCA_001297185.1	NP_001180457.1	79634	SCRN3	FS
GCA_001297185.1	NP_078859.2	79634	SCRN3	FS
GCA_001297185.1	NP_068591.2	79748	LMAN1L	FS
GCA_001297185.1	NP_891554.1	79778	MICALL2	FS
GCA_001297185.1	NP_001027026.1	79836	LONRF3	FS
GCA_001297185.1	NP_001276038.1	79836	LONRF3	FS
GCA_001297185.1	NP_079054.3	79836	LONRF3	FS
GCA_001297185.1	NP_005426.2	7984	ARHGEF5	FS
GCA_001297185.1	NP_079059.2	79841	AGBL2	FS
GCA_001297185.1	NP_001034669.1	79884	MAP9	FS
GCA_001297185.1	NP_001277260.1	79958	DENND1C	FS
GCA_001297185.1	NP_079174.2	79958	DENND1C	FS
GCA_001297185.1	NP_001026892.1	79969	ATAT1	FS
GCA_001297185.1	NP_079203.3	79990	PLEKHH3	FS
GCA_001297185.1	NP_001296171.1	80022	MYO15B	FS
GCA_001297185.1	NP_031397.1	8019	BRD3	FS
GCA_001297185.1	NP_001108585.2	80232	WDR26	FS
GCA_001297185.1	NP_079436.4	80232	WDR26	FS
GCA_001297185.1	NP_085059.2	80781	COL18A1	FS
GCA_001297185.1	NP_569711.2	80781	COL18A1	FS
GCA_001297185.1	NP_569712.2	80781	COL18A1	FS
GCA_001297185.1	NP_001020750.1	81565	NDEL1	FS
GCA_001297185.1	NP_110435.1	81565	NDEL1	FS
GCA_001297185.1	NP_112193.1	81623	DEFB126	FS
GCA_001297185.1	NP_001289972.1	81628	TSC22D4	FS
GCA_001297185.1	NP_112197.1	81628	TSC22D4	FS
GCA_001297185.1	NP_112214.2	81788	NUAK2	FS
GCA_001297185.1	NP_006003.1	8192	CLPP	FS
GCA_001297185.1	NP_073210.1	8220	DGCR14	FS
GCA_001297185.1	NP_036359.3	8225	GTPBP6	FS
GCA_001297185.1	NP_005079.2	8227	AKAP17A	FS
GCA_001297185.1	NP_001191395.1	8241	RBM10	FS
GCA_001297185.1	NP_001191396.1	8241	RBM10	FS
GCA_001297185.1	NP_001191397.1	8241	RBM10	FS
GCA_001297185.1	NP_005667.2	8241	RBM10	FS
GCA_001297185.1	NP_690595.1	8241	RBM10	FS
GCA_001297185.1	NP_004646.3	8313	AXIN2	FS
GCA_001297185.1	NP_112574.3	83440	ADPGK	FS
GCA_001297185.1	NP_001284531.1	83461	CDCA3	FS
GCA_001297185.1	NP_001284532.1	83461	CDCA3	FS
GCA_001297185.1	NP_001284533.1	83461	CDCA3	FS
GCA_001297185.1	NP_112589.1	83461	CDCA3	FS
GCA_001297185.1	NP_114119.2	83850	ESYT3	FS
GCA_001297185.1	NP_114124.1	83855	KLF16	FS
GCA_001297185.1	NP_001277141.1	83882	TSPAN10	FS
GCA_001297185.1	NP_114151.3	83882	TSPAN10	FS
GCA_001297185.1	NP_114163.1	83895	KRTAP1-5	FS
GCA_001297185.1	NP_114429.2	83987	CCDC8	FS
GCA_001297185.1	NP_115505.2	84069	PLEKHN1	FS
GCA_001297185.1	NP_115510.1	84074	QRICH2	FS
GCA_001297185.1	NP_115648.2	84232	MAF1	FS
GCA_001297185.1	NP_115787.1	84417	C2orf40	FS
GCA_001297185.1	NP_001120730.1	84439	HHIPL1	FS
GCA_001297185.1	NP_115871.1	84444	DOT1L	FS
GCA_001297185.1	NP_115806.1	84446	BRSK1	FS
GCA_001297185.1	NP_115811.2	84451	KIAA1804	FS
GCA_001297185.1	NP_115820.2	84464	SLX4	FS
GCA_001297185.1	NP_115823.3	84467	FBN3	FS
GCA_001297185.1	NP_001120936.2	84627	ZNF469	FS
GCA_001297185.1	NP_001073964.2	84629	TNRC18	FS
GCA_001297185.1	NP_001243587.1	8463	TEAD2	FS
GCA_001297185.1	NP_001243588.1	8463	TEAD2	FS
GCA_001297185.1	NP_001243589.1	8463	TEAD2	FS
GCA_001297185.1	NP_001243590.1	8463	TEAD2	FS
GCA_001297185.1	NP_001243591.1	8463	TEAD2	FS
GCA_001297185.1	NP_003589.1	8463	TEAD2	FS
GCA_001297185.1	NP_115927.1	84630	TTBK1	FS
GCA_001297185.1	NP_115964.2	84662	GLIS2	FS
GCA_001297185.1	NP_001073160.1	84689	MS4A14	FS
GCA_001297185.1	NP_001248756.1	84689	MS4A14	FS
GCA_001297185.1	NP_001248757.1	84689	MS4A14	FS
GCA_001297185.1	NP_115986.3	84689	MS4A14	FS
GCA_001297185.1	NP_116023.2	84720	PIGO	FS
GCA_001297185.1	NP_116204.3	84901	NFATC2IP	FS
GCA_001297185.1	NP_001070736.1	84936	ZFYVE19	FS
GCA_001297185.1	NP_001245349.1	84936	ZFYVE19	FS
GCA_001297185.1	NP_001171835.1	84961	FBXL20	FS
GCA_001297185.1	NP_116264.2	84961	FBXL20	FS
GCA_001297185.1	NP_001290415.1	8505	PARG	FS
GCA_001297185.1	NP_001290416.1	8505	PARG	FS
GCA_001297185.1	NP_001290418.1	8505	PARG	FS
GCA_001297185.1	NP_003622.2	8505	PARG	FS
GCA_001297185.1	NP_008914.1	8510	MMP23B	FS
GCA_001297185.1	NP_003628.2	8515	ITGA10	FS
GCA_001297185.1	NP_001099010.1	8525	DGKZ	FS
GCA_001297185.1	NP_001186195.1	8525	DGKZ	FS
GCA_001297185.1	NP_001186196.1	8525	DGKZ	FS
GCA_001297185.1	NP_001186197.1	8525	DGKZ	FS
GCA_001297185.1	NP_003637.2	8525	DGKZ	FS
GCA_001297185.1	NP_963290.1	8525	DGKZ	FS
GCA_001297185.1	NP_963291.2	8525	DGKZ	FS
GCA_001297185.1	NP_872288.2	85319	BAGE2	FS
GCA_001297185.1	NP_065194.2	85378	TUBGCP6	FS
GCA_001297185.1	NP_207646.2	85446	ZFHX2	FS
GCA_001297185.1	NP_001291289.1	85452	CFAP74	FS
GCA_001297185.1	NP_277045.1	85455	DISP2	FS
GCA_001297185.1	NP_203754.2	85456	TNKS1BP1	FS
GCA_001297185.1	NP_203751.2	85462	FHDC1	FS
GCA_001297185.1	NP_001278908.1	8602	NOP14	FS
GCA_001297185.1	NP_003705.1	8614	STC2	FS
GCA_001297185.1	NP_003773.1	8705	B3GALT4	FS
GCA_001297185.1	NP_001227.1	874	CBR3	FS
GCA_001297185.1	NP_003914.1	8928	FOXH1	FS
GCA_001297185.1	NP_001075.1	8985	PLOD3	FS
GCA_001297185.1	NP_443729.1	89858	SIGLEC12	FS
GCA_001297185.1	NP_775733.3	89932	PAPLN	FS
GCA_001297185.1	NP_001074444.1	9185	REPS2	FS
GCA_001297185.1	NP_004717.2	9185	REPS2	FS
GCA_001297185.1	NP_001241669.1	9187	SLC24A1	FS
GCA_001297185.1	NP_001287960.1	9187	SLC24A1	FS
GCA_001297185.1	NP_001287961.1	9187	SLC24A1	FS
GCA_001297185.1	NP_001287962.1	9187	SLC24A1	FS
GCA_001297185.1	NP_004718.1	9187	SLC24A1	FS
GCA_001297185.1	NP_001164633.1	9203	ZMYM3	FS
GCA_001297185.1	NP_005087.1	9203	ZMYM3	FS
GCA_001297185.1	NP_963893.1	9203	ZMYM3	FS
GCA_001297185.1	NP_981956.1	92162	TMEM88	FS
GCA_001297185.1	NP_149091.1	92211	CDHR1	FS
GCA_001297185.1	NP_008916.2	9284	NPIPA1	FS
GCA_001297185.1	NP_612405.2	92979	2016-03-09	FS
GCA_001297185.1	NP_001139784.1	93649	MYOCD	FS
GCA_001297185.1	NP_705832.1	93649	MYOCD	FS
GCA_001297185.1	NP_620063.1	9379	NRXN2	FS
GCA_001297185.1	NP_001274418.1	9381	OTOF	FS
GCA_001297185.1	NP_004793.2	9381	OTOF	FS
GCA_001297185.1	NP_919224.1	9381	OTOF	FS
GCA_001297185.1	NP_919303.1	9381	OTOF	FS
GCA_001297185.1	NP_919304.1	9381	OTOF	FS
GCA_001297185.1	NP_078966.2	94025	MUC16	FS
GCA_001297185.1	NP_001073926.1	94030	LRRC4B	FS
GCA_001297185.1	NP_849188.4	94137	RP1L1	FS
GCA_001297185.1	NP_004272.2	9531	BAG3	FS
GCA_001297185.1	NP_004881.2	9552	SPAG7	FS
GCA_001297185.1	NP_004283.2	9610	RIN1	FS
GCA_001297185.1	NP_001070729.2	9612	NCOR2	FS
GCA_001297185.1	NP_001193583.1	9612	NCOR2	FS
GCA_001297185.1	NP_006303.4	9612	NCOR2	FS
GCA_001297185.1	NP_001008738.2	96459	FNIP1	FS
GCA_001297185.1	NP_588613.2	96459	FNIP1	FS
GCA_001297185.1	NP_055453.2	9651	PLCH2	FS
GCA_001297185.1	NP_001002811.2	9659	PDE4DIP	FS
GCA_001297185.1	NP_055464.1	9667	SAFB2	FS
GCA_001297185.1	NP_055490.4	9696	CROCC	FS
GCA_001297185.1	NP_001010989.1	9709	HERPUD1	FS
GCA_001297185.1	NP_055500.1	9709	HERPUD1	FS
GCA_001297185.1	NP_055511.2	9721	GPRIN2	FS
GCA_001297185.1	NP_001165375.1	9730	VPRBP	FS
GCA_001297185.1	NP_055518.1	9730	VPRBP	FS
GCA_001297185.1	NP_055542.1	9757	KMT2B	FS
GCA_001297185.1	NP_055619.2	9851	KIAA0753	FS
GCA_001297185.1	NP_001265578.1	9885	OSBPL2	FS
GCA_001297185.1	NP_055650.1	9885	OSBPL2	FS
GCA_001297185.1	NP_653081.1	9885	OSBPL2	FS
GCA_001297185.1	NP_001127854.1	9922	IQSEC1	FS
GCA_001297185.1	NP_005453.2	9947	MAGEC1	FS
GCA_001297185.1	NP_005107.4	9962	SLC23A2	FS
GCA_001297185.1	NP_976072.1	9962	SLC23A2	FS
GCA_001297185.1	NP_005111.2	9968	MED12	FS
GCA_001307025.1	NP_940897.2	100128553	CTAGE4	FS
GCA_001307025.1	NP_001269408.1	100131608	PRR23D1	FS
GCA_001307025.1	NP_001297084.1	100133301	FAM231B	FS
GCA_001307025.1	NP_001265516.1	100134391	LOC100134391	FS
GCA_001307025.1	NP_005466.1	10019	SH2B3	FS
GCA_001307025.1	NP_001243781.1	100287144	USP17L10	FS
GCA_001307025.1	NP_878908.4	100287171	WASH1	FS
GCA_001307025.1	NP_001243783.1	100287178	USP17L11	FS
GCA_001307025.1	NP_001243784.1	100287238	USP17L13	FS
GCA_001307025.1	NP_001264232.1	100287399	POTEB2	FS
GCA_001307025.1	NP_001136003.1	10044	SH2D3C	FS
GCA_001307025.1	NP_001136004.1	10044	SH2D3C	FS
GCA_001307025.1	NP_001136005.1	10044	SH2D3C	FS
GCA_001307025.1	NP_001136006.1	10044	SH2D3C	FS
GCA_001307025.1	NP_001239263.1	10044	SH2D3C	FS
GCA_001307025.1	NP_005480.2	10044	SH2D3C	FS
GCA_001307025.1	NP_733745.1	10044	SH2D3C	FS
GCA_001307025.1	NP_057237.1	100506164	HSFX1	FS
GCA_001307025.1	NP_001229836.1	100506888	TCEB3CL2	FS
GCA_001307025.1	NP_001170990.1	100507436	MICA	FS
GCA_001307025.1	NP_001276081.1	100507436	MICA	FS
GCA_001307025.1	NP_001276082.1	100507436	MICA	FS
GCA_001307025.1	NP_001276083.1	100507436	MICA	FS
GCA_001307025.1	NP_001182188.1	100507588	TGFBR3L	FS
GCA_001307025.1	NP_001181930.1	10076	PTPRU	FS
GCA_001307025.1	NP_005695.3	10076	PTPRU	FS
GCA_001307025.1	NP_573438.3	10076	PTPRU	FS
GCA_001307025.1	NP_573439.2	10076	PTPRU	FS
GCA_001307025.1	NP_001278393.1	101060351	TBC1D3K	FS
GCA_001307025.1	NP_001278388.1	101060376	TBC1D3L	FS
GCA_001307025.1	NP_001263183.2	101180976	IFNL4	FS
GCA_001307025.1	NP_001191673.1	1014	CDH16	FS
GCA_001307025.1	NP_001191674.1	1014	CDH16	FS
GCA_001307025.1	NP_001191675.1	1014	CDH16	FS
GCA_001307025.1	NP_004053.1	1014	CDH16	FS
GCA_001307025.1	NP_001073346.2	10156	RASA4	FS
GCA_001307025.1	NP_008920.5	10156	RASA4	FS
GCA_001307025.1	NP_001018003.1	10174	SORBS3	FS
GCA_001307025.1	NP_005766.3	10174	SORBS3	FS
GCA_001307025.1	NP_000066.1	1019	CDK4	FS
GCA_001307025.1	NP_005877.2	10300	KATNB1	FS
GCA_001307025.1	NP_006090.2	10401	PIAS3	FS
GCA_001307025.1	NP_057596.1	10407	SPAG11B	FS
GCA_001307025.1	NP_478107.2	10407	SPAG11B	FS
GCA_001307025.1	NP_478108.2	10407	SPAG11B	FS
GCA_001307025.1	NP_478113.2	10407	SPAG11B	FS
GCA_001307025.1	NP_478114.2	10407	SPAG11B	FS
GCA_001307025.1	NP_001265361.1	10443	N4BP2L2	FS
GCA_001307025.1	NP_149102.3	10443	N4BP2L2	FS
GCA_001307025.1	NP_001154992.1	10466	COG5	FS
GCA_001307025.1	NP_006339.3	10466	COG5	FS
GCA_001307025.1	NP_859422.2	10466	COG5	FS
GCA_001307025.1	NP_001166955.1	10529	NEBL	FS
GCA_001307025.1	NP_998734.1	10529	NEBL	FS
GCA_001307025.1	NP_001798.2	1056	CEL	FS
GCA_001307025.1	NP_006471.2	10636	RGS14	FS
GCA_001307025.1	NP_001193872.1	10675	CSPG5	FS
GCA_001307025.1	NP_001193874.1	10675	CSPG5	FS
GCA_001307025.1	NP_006571.1	10686	CLDN16	FS
GCA_001307025.1	NP_006653.2	10847	SRCAP	FS
GCA_001307025.1	NP_001284519.1	10849	CD3EAP	FS
GCA_001307025.1	NP_036231.1	10849	CD3EAP	FS
GCA_001307025.1	NP_001138297.1	10900	RUNDC3A	FS
GCA_001307025.1	NP_001138298.1	10900	RUNDC3A	FS
GCA_001307025.1	NP_006686.1	10900	RUNDC3A	FS
GCA_001307025.1	NP_001159583.1	10908	PNPLA6	FS
GCA_001307025.1	NP_001159584.1	10908	PNPLA6	FS
GCA_001307025.1	NP_001159585.1	10908	PNPLA6	FS
GCA_001307025.1	NP_001159586.1	10908	PNPLA6	FS
GCA_001307025.1	NP_006693.3	10908	PNPLA6	FS
GCA_001307025.1	NP_001005271.2	1107	CHD3	FS
GCA_001307025.1	NP_008977.1	11117	EMILIN1	FS
GCA_001307025.1	NP_001036065.1	11184	MAP4K1	FS
GCA_001307025.1	NP_009112.1	11184	MAP4K1	FS
GCA_001307025.1	NP_009122.2	11197	WIF1	FS
GCA_001307025.1	NP_001258662.1	11223	MST1L	FS
GCA_001307025.1	NP_009155.1	11247	NXPH4	FS
GCA_001307025.1	NP_001152768.1	11279	KLF8	FS
GCA_001307025.1	NP_009181.2	11279	KLF8	FS
GCA_001307025.1	NP_000072.2	1130	LYST	FS
GCA_001307025.1	NP_001288294.1	1130	LYST	FS
GCA_001307025.1	NP_612444.2	113828	FAM83F	FS
GCA_001307025.1	NP_542401.1	113829	SLC35A4	FS
GCA_001307025.1	NP_001265354.1	114780	PKD1L2	FS
GCA_001307025.1	NP_443124.3	114780	PKD1L2	FS
GCA_001307025.1	NP_001073903.1	114783	LMTK3	FS
GCA_001307025.1	NP_001166101.1	115703	ARHGAP33	FS
GCA_001307025.1	NP_443180.2	115703	ARHGAP33	FS
GCA_001307025.1	NP_619635.1	116444	GRIN3B	FS
GCA_001307025.1	NP_443198.1	116496	FAM129A	FS
GCA_001307025.1	NP_001035207.1	116985	ARAP1	FS
GCA_001307025.1	NP_001231817.1	116987	AGAP1	FS
GCA_001307025.1	NP_001036000.1	116988	AGAP3	FS
GCA_001307025.1	NP_001268229.1	116988	AGAP3	FS
GCA_001307025.1	NP_001295233.1	116988	AGAP3	FS
GCA_001307025.1	NP_001295234.1	116988	AGAP3	FS
GCA_001307025.1	NP_114152.3	116988	AGAP3	FS
GCA_001307025.1	NP_001002261.1	118813	ZFYVE27	FS
GCA_001307025.1	NP_001002262.1	118813	ZFYVE27	FS
GCA_001307025.1	NP_001167590.1	118813	ZFYVE27	FS
GCA_001307025.1	NP_001167591.1	118813	ZFYVE27	FS
GCA_001307025.1	NP_001167592.1	118813	ZFYVE27	FS
GCA_001307025.1	NP_001167593.1	118813	ZFYVE27	FS
GCA_001307025.1	NP_653189.3	118813	ZFYVE27	FS
GCA_001307025.1	NP_937791.2	119587	CPXM2	FS
GCA_001307025.1	NP_001290055.1	121268	RHEBL1	FS
GCA_001307025.1	NP_998761.2	121643	FOXN4	FS
GCA_001307025.1	NP_001229797.1	122060	SLAIN1	FS
GCA_001307025.1	NP_940843.1	122183	PRR20A	FS
GCA_001307025.1	NP_001295103.1	122618	PLD4	FS
GCA_001307025.1	NP_620145.2	122618	PLD4	FS
GCA_001307025.1	NP_001004717.1	122742	OR4L1	FS
GCA_001307025.1	NP_001254650.1	124056	NOXO1	FS
GCA_001307025.1	NP_653204.1	124056	NOXO1	FS
GCA_001307025.1	NP_751907.1	124056	NOXO1	FS
GCA_001307025.1	NP_751908.1	124056	NOXO1	FS
GCA_001307025.1	NP_001138944.1	125336	LOXHD1	FS
GCA_001307025.1	NP_001138945.1	125336	LOXHD1	FS
GCA_001307025.1	NP_001166600.1	125336	LOXHD1	FS
GCA_001307025.1	NP_001294942.1	125336	LOXHD1	FS
GCA_001307025.1	NP_653213.6	125336	LOXHD1	FS
GCA_001307025.1	NP_001162597.1	126259	TMIGD2	FS
GCA_001307025.1	NP_001295161.1	126259	TMIGD2	FS
GCA_001307025.1	NP_653216.2	126259	TMIGD2	FS
GCA_001307025.1	NP_001007256.1	126823	KLHDC9	FS
GCA_001307025.1	NP_689579.3	126823	KLHDC9	FS
GCA_001307025.1	NP_001004492.1	127623	OR2B11	FS
GCA_001307025.1	NP_001034589.2	127731	VWA5B1	FS
GCA_001307025.1	NP_000085.1	1294	COL7A1	FS
GCA_001307025.1	NP_001121637.1	129804	FBLN7	FS
GCA_001307025.1	NP_694946.2	129804	FBLN7	FS
GCA_001307025.1	NP_000484.2	1300	COL10A1	FS
GCA_001307025.1	NP_542411.2	1302	COL11A2	FS
GCA_001307025.1	NP_001035500.1	138724	C9orf131	FS
GCA_001307025.1	NP_001035501.1	138724	C9orf131	FS
GCA_001307025.1	NP_001035502.1	138724	C9orf131	FS
GCA_001307025.1	NP_001274320.1	138724	C9orf131	FS
GCA_001307025.1	NP_976044.2	138724	C9orf131	FS
GCA_001307025.1	NP_001078.2	14	AAMP	FS
GCA_001307025.1	NP_001289474.1	14	AAMP	FS
GCA_001307025.1	NP_001243727.1	140688	NOL4L	FS
GCA_001307025.1	NP_542183.2	140688	NOL4L	FS
GCA_001307025.1	NP_001277197.1	140876	FAM65C	FS
GCA_001307025.1	NP_543019.2	140876	FAM65C	FS
GCA_001307025.1	NP_001164157.1	142678	MIB2	FS
GCA_001307025.1	NP_001164158.1	142678	MIB2	FS
GCA_001307025.1	NP_001164159.1	142678	MIB2	FS
GCA_001307025.1	NP_001164160.1	142678	MIB2	FS
GCA_001307025.1	NP_543151.2	142678	MIB2	FS
GCA_001307025.1	NP_653264.1	143501	C11orf40	FS
GCA_001307025.1	NP_001074961.1	144501	KRT80	FS
GCA_001307025.1	NP_872313.2	144501	KRT80	FS
GCA_001307025.1	NP_775771.3	146057	TTBK2	FS
GCA_001307025.1	NP_001013860.1	146206	RLTPR	FS
GCA_001307025.1	NP_001303955.1	146206	RLTPR	FS
GCA_001307025.1	NP_001157394.1	147645	VSIG10L	FS
GCA_001307025.1	NP_001284553.1	147657	ZNF480	FS
GCA_001307025.1	NP_653285.2	147657	ZNF480	FS
GCA_001307025.1	NP_612143.2	148213	ZNF681	FS
GCA_001307025.1	NP_001094344.1	150159	SLC9B1	FS
GCA_001307025.1	NP_631912.2	150159	SLC9B1	FS
GCA_001307025.1	NP_620169.1	150379	PNPLA5	FS
GCA_001307025.1	NP_659399.2	157310	PEBP4	FS
GCA_001307025.1	NP_001020436.1	158830	CXorf65	FS
GCA_001307025.1	NP_001006939.2	158931	TCEAL6	FS
GCA_001307025.1	NP_000776.1	1594	CYP27B1	FS
GCA_001307025.1	NP_001240679.1	160365	CLECL1	FS
GCA_001307025.1	NP_001254630.1	160365	CLECL1	FS
GCA_001307025.1	NP_742001.1	160365	CLECL1	FS
GCA_001307025.1	NP_714544.1	161497	STRC	FS
GCA_001307025.1	NP_722520.2	161882	ZFPM1	FS
GCA_001307025.1	NP_694551.1	162417	NAGS	FS
GCA_001307025.1	NP_001277250.1	1657	DMXL1	FS
GCA_001307025.1	NP_001277251.1	1657	DMXL1	FS
GCA_001307025.1	NP_005500.4	1657	DMXL1	FS
GCA_001307025.1	NP_690848.1	169044	COL22A1	FS
GCA_001307025.1	NP_001092107.1	170394	PWWP2B	FS
GCA_001307025.1	NP_612508.3	170394	PWWP2B	FS
GCA_001307025.1	NP_056153.2	171023	ASXL1	FS
GCA_001307025.1	NP_001135935.1	1736	DKC1	FS
GCA_001307025.1	NP_001275676.1	1736	DKC1	FS
GCA_001307025.1	NP_001354.1	1736	DKC1	FS
GCA_001307025.1	NP_001374.3	1801	DPH1	FS
GCA_001307025.1	NP_004939.1	1823	DSC1	FS
GCA_001307025.1	NP_077739.1	1823	DSC1	FS
GCA_001307025.1	NP_004940.1	1824	DSC2	FS
GCA_001307025.1	NP_077740.1	1824	DSC2	FS
GCA_001307025.1	NP_001385.1	1846	DUSP4	FS
GCA_001307025.1	NP_932157.1	1912	PHC2	FS
GCA_001307025.1	NP_001398.2	1951	CELSR3	FS
GCA_001307025.1	NP_001258867.1	1954	MEGF8	FS
GCA_001307025.1	NP_001401.2	1954	MEGF8	FS
GCA_001307025.1	NP_710162.1	195828	ZNF367	FS
GCA_001307025.1	NP_872336.2	196446	MYRFL	FS
GCA_001307025.1	NP_001181875.1	1981	EIF4G1	FS
GCA_001307025.1	NP_001181876.1	1981	EIF4G1	FS
GCA_001307025.1	NP_001278086.1	1981	EIF4G1	FS
GCA_001307025.1	NP_004944.3	1981	EIF4G1	FS
GCA_001307025.1	NP_886553.3	1981	EIF4G1	FS
GCA_001307025.1	NP_937884.1	1981	EIF4G1	FS
GCA_001307025.1	NP_937885.1	1981	EIF4G1	FS
GCA_001307025.1	NP_937887.1	1981	EIF4G1	FS
GCA_001307025.1	NP_001411.2	1995	ELAVL3	FS
GCA_001307025.1	NP_115657.2	1995	ELAVL3	FS
GCA_001307025.1	NP_963840.2	200008	CDCP2	FS
GCA_001307025.1	NP_004426.2	2021	ENDOG	FS
GCA_001307025.1	NP_001156619.1	2115	ETV1	FS
GCA_001307025.1	NP_001156620.1	2115	ETV1	FS
GCA_001307025.1	NP_001156621.1	2115	ETV1	FS
GCA_001307025.1	NP_001156622.1	2115	ETV1	FS
GCA_001307025.1	NP_001156623.1	2115	ETV1	FS
GCA_001307025.1	NP_004947.2	2115	ETV1	FS
GCA_001307025.1	NP_001431.1	2137	EXTL3	FS
GCA_001307025.1	NP_000024.2	215	ABCD1	FS
GCA_001307025.1	NP_004452.1	2193	FARSA	FS
GCA_001307025.1	NP_660349.1	219738	C10orf35	FS
GCA_001307025.1	NP_689929.2	219988	PATL1	FS
GCA_001307025.1	NP_878253.1	220032	GDPD4	FS
GCA_001307025.1	NP_001136408.1	221955	DAGLB	FS
GCA_001307025.1	NP_631918.3	221955	DAGLB	FS
GCA_001307025.1	NP_001138740.1	222234	FAM185A	FS
GCA_001307025.1	NP_001138741.1	222234	FAM185A	FS
GCA_001307025.1	NP_055772.2	22898	DENND3	FS
GCA_001307025.1	NP_001093592.1	22904	SBNO2	FS
GCA_001307025.1	NP_036362.3	22932	POMZP3	FS
GCA_001307025.1	NP_004463.1	2297	FOXD1	FS
GCA_001307025.1	NP_997188.2	2298	FOXD4	FS
GCA_001307025.1	NP_001264214.1	22997	IGSF9B	FS
GCA_001307025.1	NP_055812.1	23008	KLHDC10	FS
GCA_001307025.1	NP_001185879.1	23026	MYO16	FS
GCA_001307025.1	NP_055826.1	23026	MYO16	FS
GCA_001307025.1	NP_055839.3	23039	XPO7	FS
GCA_001307025.1	NP_001272376.1	23042	PDXDC1	FS
GCA_001307025.1	NP_001272377.1	23042	PDXDC1	FS
GCA_001307025.1	NP_055858.2	23061	TBC1D9B	FS
GCA_001307025.1	NP_942568.2	23061	TBC1D9B	FS
GCA_001307025.1	NP_001155973.1	23112	TNRC6B	FS
GCA_001307025.1	NP_055903.2	23112	TNRC6B	FS
GCA_001307025.1	NP_569731.2	23117	NPIPB3	FS
GCA_001307025.1	NP_055909.2	23119	HIC2	FS
GCA_001307025.1	NP_055919.2	23130	ATG2A	FS
GCA_001307025.1	NP_001073893.1	23135	KDM6B	FS
GCA_001307025.1	NP_001291744.1	23152	CIC	FS
GCA_001307025.1	NP_055940.3	23152	CIC	FS
GCA_001307025.1	NP_001035529.1	23162	MAPK8IP3	FS
GCA_001307025.1	NP_055948.2	23162	MAPK8IP3	FS
GCA_001307025.1	NP_055951.2	23166	STAB1	FS
GCA_001307025.1	NP_001157789.1	2317	FLNB	FS
GCA_001307025.1	NP_001157790.1	2317	FLNB	FS
GCA_001307025.1	NP_001157791.1	2317	FLNB	FS
GCA_001307025.1	NP_001448.2	2317	FLNB	FS
GCA_001307025.1	NP_001138230.1	23187	PHLDB1	FS
GCA_001307025.1	NP_001138231.1	23187	PHLDB1	FS
GCA_001307025.1	NP_055972.1	23187	PHLDB1	FS
GCA_001307025.1	NP_055983.1	23211	ZC3H4	FS
GCA_001307025.1	NP_001274365.1	23242	COBL	FS
GCA_001307025.1	NP_001274367.1	23242	COBL	FS
GCA_001307025.1	NP_056013.2	23242	COBL	FS
GCA_001307025.1	NP_056025.2	23255	MTCL1	FS
GCA_001307025.1	NP_001106207.1	23272	FAM208A	FS
GCA_001307025.1	NP_056039.2	23272	FAM208A	FS
GCA_001307025.1	NP_056044.3	23277	CLUH	FS
GCA_001307025.1	NP_056050.1	23283	CSTF2T	FS
GCA_001307025.1	NP_056100.2	23335	WDR7	FS
GCA_001307025.1	NP_443066.2	23335	WDR7	FS
GCA_001307025.1	NP_001276913.1	23338	JADE2	FS
GCA_001307025.1	NP_001276914.1	23338	JADE2	FS
GCA_001307025.1	NP_001295072.1	23338	JADE2	FS
GCA_001307025.1	NP_056103.4	23338	JADE2	FS
GCA_001307025.1	NP_149062.1	23345	SYNE1	FS
GCA_001307025.1	NP_892006.3	23345	SYNE1	FS
GCA_001307025.1	NP_001135446.1	23400	ATP13A2	FS
GCA_001307025.1	NP_490597.1	23476	BRD4	FS
GCA_001307025.1	NP_001188356.1	23500	DAAM2	FS
GCA_001307025.1	NP_056160.2	23500	DAAM2	FS
GCA_001307025.1	NP_000795.2	2352	FOLR3	FS
GCA_001307025.1	NP_036507.2	23538	OR52A1	FS
GCA_001307025.1	NP_036583.2	23546	SYNGR4	FS
GCA_001307025.1	NP_001230716.1	23583	SMUG1	FS
GCA_001307025.1	NP_001230717.1	23583	SMUG1	FS
GCA_001307025.1	NP_001230718.1	23583	SMUG1	FS
GCA_001307025.1	NP_001230719.1	23583	SMUG1	FS
GCA_001307025.1	NP_001230720.1	23583	SMUG1	FS
GCA_001307025.1	NP_055126.1	23583	SMUG1	FS
GCA_001307025.1	NP_055127.2	23584	VSIG2	FS
GCA_001307025.1	NP_001291737.1	23774	BRD1	FS
GCA_001307025.1	NP_001291738.1	23774	BRD1	FS
GCA_001307025.1	NP_001258570.1	23787	MTCH1	FS
GCA_001307025.1	NP_055156.1	23787	MTCH1	FS
GCA_001307025.1	NP_001180197.1	24139	EML2	FS
GCA_001307025.1	NP_001162577.1	253725	FAM21C	FS
GCA_001307025.1	NP_001162578.1	253725	FAM21C	FS
GCA_001307025.1	NP_056077.2	253725	FAM21C	FS
GCA_001307025.1	NP_001035753.1	2543	GAGE1	FS
GCA_001307025.1	NP_862827.1	255877	BCL6B	FS
GCA_001307025.1	NP_001265227.1	256076	COL6A5	FS
GCA_001307025.1	NP_835455.1	256297	PTF1A	FS
GCA_001307025.1	NP_001287722.1	256364	EML3	FS
GCA_001307025.1	NP_001287723.1	256364	EML3	FS
GCA_001307025.1	NP_694997.2	256364	EML3	FS
GCA_001307025.1	NP_001004752.1	256892	OR51F1	FS
GCA_001307025.1	NP_001124487.1	25792	CIZ1	FS
GCA_001307025.1	NP_001124488.1	25792	CIZ1	FS
GCA_001307025.1	NP_001124489.1	25792	CIZ1	FS
GCA_001307025.1	NP_001124490.1	25792	CIZ1	FS
GCA_001307025.1	NP_001244904.1	25792	CIZ1	FS
GCA_001307025.1	NP_036259.2	25792	CIZ1	FS
GCA_001307025.1	NP_000144.2	2581	GALC	FS
GCA_001307025.1	NP_001188330.1	2581	GALC	FS
GCA_001307025.1	NP_001188331.1	2581	GALC	FS
GCA_001307025.1	NP_001161750.1	25937	WWTR1	FS
GCA_001307025.1	NP_001161752.1	25937	WWTR1	FS
GCA_001307025.1	NP_056287.1	25937	WWTR1	FS
GCA_001307025.1	NP_001139267.1	25970	SH2B1	FS
GCA_001307025.1	NP_001139268.1	25970	SH2B1	FS
GCA_001307025.1	NP_001139269.1	25970	SH2B1	FS
GCA_001307025.1	NP_001139284.1	25970	SH2B1	FS
GCA_001307025.1	NP_001295222.1	25970	SH2B1	FS
GCA_001307025.1	NP_056318.2	25970	SH2B1	FS
GCA_001307025.1	NP_001123582.1	26040	SETBP1	FS
GCA_001307025.1	NP_056374.2	26040	SETBP1	FS
GCA_001307025.1	NP_001035816.1	26095	PTPN20	FS
GCA_001307025.1	NP_001035817.1	26095	PTPN20	FS
GCA_001307025.1	NP_001035818.1	26095	PTPN20	FS
GCA_001307025.1	NP_001035820.1	26095	PTPN20	FS
GCA_001307025.1	NP_001035821.1	26095	PTPN20	FS
GCA_001307025.1	NP_056420.3	26095	PTPN20	FS
GCA_001307025.1	NP_056471.1	26153	KIF26A	FS
GCA_001307025.1	NP_056482.2	26165	SPATA31A7	FS
GCA_001307025.1	NP_001139133.1	2624	GATA2	FS
GCA_001307025.1	NP_001139134.1	2624	GATA2	FS
GCA_001307025.1	NP_116027.2	2624	GATA2	FS
GCA_001307025.1	NP_001002295.1	2625	GATA3	FS
GCA_001307025.1	NP_002042.1	2625	GATA3	FS
GCA_001307025.1	NP_001005338.1	26341	OR5H1	FS
GCA_001307025.1	NP_036598.1	26526	TSPAN16	FS
GCA_001307025.1	NP_001483.3	2657	GDF1	FS
GCA_001307025.1	NP_001280220.1	26579	MYEOV	FS
GCA_001307025.1	NP_001280223.1	26579	MYEOV	FS
GCA_001307025.1	NP_001280225.1	26579	MYEOV	FS
GCA_001307025.1	NP_001287852.1	26579	MYEOV	FS
GCA_001307025.1	NP_001287853.1	26579	MYEOV	FS
GCA_001307025.1	NP_620123.2	26579	MYEOV	FS
GCA_001307025.1	NP_001108628.1	2665	GDI2	FS
GCA_001307025.1	NP_001485.2	2665	GDI2	FS
GCA_001307025.1	NP_001005224.1	26683	OR4F3	FS
GCA_001307025.1	NP_473448.1	26740	OR1J2	FS
GCA_001307025.1	NP_004113.1	2693	GHSR	FS
GCA_001307025.1	NP_940799.1	2693	GHSR	FS
GCA_001307025.1	NP_001231191.1	26959	HBP1	FS
GCA_001307025.1	NP_036389.2	26959	HBP1	FS
GCA_001307025.1	NP_001230402.1	27077	B9D1	FS
GCA_001307025.1	NP_001230404.1	27077	B9D1	FS
GCA_001307025.1	NP_056496.1	27077	B9D1	FS
GCA_001307025.1	NP_071328.2	27085	MTBP	FS
GCA_001307025.1	NP_056509.2	27153	ZNF777	FS
GCA_001307025.1	NP_000395.2	2720	GLB1	FS
GCA_001307025.1	NP_001129074.1	2720	GLB1	FS
GCA_001307025.1	NP_001303969.1	2720	GLB1	FS
GCA_001307025.1	NP_055288.1	27292	DIMT1	FS
GCA_001307025.1	NP_689627.1	27319	BHLHE22	FS
GCA_001307025.1	NP_001269549.1	2771	GNAI2	FS
GCA_001307025.1	NP_065202.2	28	ABO	FS
GCA_001307025.1	NP_872363.1	283149	BCL9L	FS
GCA_001307025.1	NP_001263203.1	283232	TMEM80	FS
GCA_001307025.1	NP_115627.6	283234	CCDC88B	FS
GCA_001307025.1	NP_001103132.3	283450	HECTD4	FS
GCA_001307025.1	NP_001106197.1	283638	CEP170B	FS
GCA_001307025.1	NP_055820.2	283638	CEP170B	FS
GCA_001307025.1	NP_001291317.1	283685	GOLGA6L2	FS
GCA_001307025.1	NP_001230467.1	283710	LOC283710	FS
GCA_001307025.1	NP_775882.2	283742	FAM98B	FS
GCA_001307025.1	NP_848611.2	283849	EXOC3L1	FS
GCA_001307025.1	NP_940877.2	284069	FAM171A2	FS
GCA_001307025.1	NP_835464.1	284086	NEK8	FS
GCA_001307025.1	NP_001138422.1	284297	SSC5D	FS
GCA_001307025.1	NP_001182196.1	284297	SSC5D	FS
GCA_001307025.1	NP_954979.2	284338	PRR19	FS
GCA_001307025.1	NP_848620.3	284382	ACTL9	FS
GCA_001307025.1	NP_001129979.1	284428	MBD3L5	FS
GCA_001307025.1	NP_001092909.1	284656	EPHA10	FS
GCA_001307025.1	NP_061844.1	2850	GPR27	FS
GCA_001307025.1	NP_001243543.1	285242	HTR3E	FS
GCA_001307025.1	NP_872395.2	285242	HTR3E	FS
GCA_001307025.1	NP_938056.1	285242	HTR3E	FS
GCA_001307025.1	NP_001012524.4	285331	CCDC66	FS
GCA_001307025.1	NP_001135419.1	285331	CCDC66	FS
GCA_001307025.1	NP_001243825.1	285489	DOK7	FS
GCA_001307025.1	NP_001288000.1	285489	DOK7	FS
GCA_001307025.1	NP_775931.3	285489	DOK7	FS
GCA_001307025.1	NP_996763.1	285659	OR2V2	FS
GCA_001307025.1	NP_940888.2	285855	RPL7L1	FS
GCA_001307025.1	NP_001120965.1	287	ANK2	FS
GCA_001307025.1	NP_001139.3	287	ANK2	FS
GCA_001307025.1	NP_066187.2	287	ANK2	FS
GCA_001307025.1	NP_001078923.1	28964	GIT1	FS
GCA_001307025.1	NP_054749.2	28964	GIT1	FS
GCA_001307025.1	NP_037373.2	29109	FHOD1	FS
GCA_001307025.1	NP_001264993.1	2911	GRM1	FS
GCA_001307025.1	NP_001264994.1	2911	GRM1	FS
GCA_001307025.1	NP_001264995.1	2911	GRM1	FS
GCA_001307025.1	NP_001264996.1	2911	GRM1	FS
GCA_001307025.1	NP_001167455.1	29117	BRD7	FS
GCA_001307025.1	NP_037395.2	29117	BRD7	FS
GCA_001307025.1	NP_001299589.1	2954	GSTZ1	FS
GCA_001307025.1	NP_665877.1	2954	GSTZ1	FS
GCA_001307025.1	NP_665878.2	2954	GSTZ1	FS
GCA_001307025.1	NP_001072982.1	29855	UBN1	FS
GCA_001307025.1	NP_001275585.1	29855	UBN1	FS
GCA_001307025.1	NP_001123543.1	29924	EPN1	FS
GCA_001307025.1	NP_001123544.1	29924	EPN1	FS
GCA_001307025.1	NP_037465.2	29924	EPN1	FS
GCA_001307025.1	NP_056526.3	29998	GLTSCR1	FS
GCA_001307025.1	NP_065102.1	29999	FSCN3	FS
GCA_001307025.1	NP_001091672.1	3090	HIC1	FS
GCA_001307025.1	NP_006488.2	3090	HIC1	FS
GCA_001307025.1	NP_001148.1	311	ANXA11	FS
GCA_001307025.1	NP_001265336.1	311	ANXA11	FS
GCA_001307025.1	NP_001265337.1	311	ANXA11	FS
GCA_001307025.1	NP_001265338.1	311	ANXA11	FS
GCA_001307025.1	NP_665875.1	311	ANXA11	FS
GCA_001307025.1	NP_665876.1	311	ANXA11	FS
GCA_001307025.1	NP_778146.2	317754	POTED	FS
GCA_001307025.1	NP_778238.1	319101	KRT73	FS
GCA_001307025.1	NP_001631.3	327	APEH	FS
GCA_001307025.1	NP_001231178.1	328	APEX1	FS
GCA_001307025.1	NP_001632.2	328	APEX1	FS
GCA_001307025.1	NP_542379.1	328	APEX1	FS
GCA_001307025.1	NP_542380.1	328	APEX1	FS
GCA_001307025.1	NP_853643.1	337973	KRTAP19-6	FS
GCA_001307025.1	NP_001129492.1	3382	ICA1	FS
GCA_001307025.1	NP_001263407.1	3382	ICA1	FS
GCA_001307025.1	NP_004959.2	3382	ICA1	FS
GCA_001307025.1	NP_071682.1	3382	ICA1	FS
GCA_001307025.1	NP_001005920.2	339123	JMJD8	FS
GCA_001307025.1	NP_998769.2	339366	ADAMTSL5	FS
GCA_001307025.1	NP_997244.4	341640	FREM2	FS
GCA_001307025.1	NP_001123292.1	342618	SLFN14	FS
GCA_001307025.1	NP_001013652.1	343066	AADACL4	FS
GCA_001307025.1	NP_001034450.3	343071	PRAMEF10	FS
GCA_001307025.1	NP_001001957.2	343171	OR2W3	FS
GCA_001307025.1	NP_001157903.1	343578	ARHGAP40	FS
GCA_001307025.1	NP_001291295.1	344658	SAMD7	FS
GCA_001307025.1	NP_872416.1	344658	SAMD7	FS
GCA_001307025.1	NP_001008784.2	344807	CD200R1L	FS
GCA_001307025.1	NP_001186144.1	344807	CD200R1L	FS
GCA_001307025.1	NP_001071174.1	345930	ECT2L	FS
GCA_001307025.1	NP_001181966.1	345930	ECT2L	FS
GCA_001307025.1	NP_001005287.1	346528	OR2A1	FS
GCA_001307025.1	NP_954714.2	349334	FOXD4L4	FS
GCA_001307025.1	NP_002177.2	3581	IL9R	FS
GCA_001307025.1	NP_000632.1	3589	IL11	FS
GCA_001307025.1	NP_001014794.1	3611	ILK	FS
GCA_001307025.1	NP_001014795.1	3611	ILK	FS
GCA_001307025.1	NP_001265370.1	3611	ILK	FS
GCA_001307025.1	NP_001265371.1	3611	ILK	FS
GCA_001307025.1	NP_004508.1	3611	ILK	FS
GCA_001307025.1	NP_001138468.1	3679	ITGA7	FS
GCA_001307025.1	NP_001138469.1	3679	ITGA7	FS
GCA_001307025.1	NP_002197.2	3679	ITGA7	FS
GCA_001307025.1	NP_001072996.1	368	ABCC6	FS
GCA_001307025.1	NP_001107852.1	3683	ITGAL	FS
GCA_001307025.1	NP_002200.2	3683	ITGAL	FS
GCA_001307025.1	NP_002218.2	3716	JAK1	FS
GCA_001307025.1	NP_001253969.1	3720	JARID2	FS
GCA_001307025.1	NP_004964.2	3720	JARID2	FS
GCA_001307025.1	NP_001098998.1	374864	CCDC178	FS
GCA_001307025.1	NP_001295055.1	374864	CCDC178	FS
GCA_001307025.1	NP_945346.2	374864	CCDC178	FS
GCA_001307025.1	NP_001138502.1	375337	TOPAZ1	FS
GCA_001307025.1	NP_001129386.1	375616	KCP	FS
GCA_001307025.1	NP_955381.2	375616	KCP	FS
GCA_001307025.1	NP_001292204.1	375790	AGRN	FS
GCA_001307025.1	NP_940978.2	375790	AGRN	FS
GCA_001307025.1	NP_066292.2	3768	KCNJ12	FS
GCA_001307025.1	NP_001191753.1	3786	KCNQ3	FS
GCA_001307025.1	NP_004510.1	3786	KCNQ3	FS
GCA_001307025.1	NP_056952.2	3804	KIR2DL3	FS
GCA_001307025.1	NP_002246.5	3805	KIR2DL4	FS
GCA_001307025.1	NP_036446.3	3809	KIR2DS4	FS
GCA_001307025.1	NP_006112.3	3848	KRT1	FS
GCA_001307025.1	NP_001005922.1	387264	KRTAP5-1	FS
GCA_001307025.1	NP_001010896.2	387638	C10orf113	FS
GCA_001307025.1	NP_001170954.1	387638	C10orf113	FS
GCA_001307025.1	NP_001128360.1	388015	RTL1	FS
GCA_001307025.1	NP_982283.2	388677	NOTCH2NL	FS
GCA_001307025.1	NP_001025054.1	388939	C2orf71	FS
GCA_001307025.1	NP_149034.2	3890	KRT84	FS
GCA_001307025.1	NP_997295.1	389649	C8orf86	FS
GCA_001307025.1	NP_001138668.1	389730	SPATA31A6	FS
GCA_001307025.1	NP_001004754.1	390064	OR51I2	FS
GCA_001307025.1	NP_001005183.1	390326	OR6C76	FS
GCA_001307025.1	NP_001005503.1	390439	OR11G2	FS
GCA_001307025.1	NP_997302.2	390664	C1QTNF8	FS
GCA_001307025.1	NP_002282.2	3912	LAMB1	FS
GCA_001307025.1	NP_001159827.1	3955	LFNG	FS
GCA_001307025.1	NP_001180414.1	3987	LIMS1	FS
GCA_001307025.1	NP_001138906.1	400713	ZNF880	FS
GCA_001307025.1	NP_001032764.2	400818	NBPF9	FS
GCA_001307025.1	NP_001264373.1	400818	NBPF9	FS
GCA_001307025.1	NP_775922.2	401024	FSIP2	FS
GCA_001307025.1	NP_001188379.1	401388	C7orf76	FS
GCA_001307025.1	NP_001188380.1	401388	C7orf76	FS
GCA_001307025.1	NP_001157738.1	4054	LTBP3	FS
GCA_001307025.1	NP_001186078.1	4057	LTF	FS
GCA_001307025.1	NP_002334.2	4057	LTF	FS
GCA_001307025.1	NP_002350.1	4097	MAFG	FS
GCA_001307025.1	NP_116100.2	4097	MAFG	FS
GCA_001307025.1	NP_005353.1	4102	MAGEA3	FS
GCA_001307025.1	NP_002364.5	4130	MAP1A	FS
GCA_001307025.1	NP_001001418.5	414060	TBC1D3C	FS
GCA_001307025.1	NP_004981.2	4141	MARS	FS
GCA_001307025.1	NP_001071133.2	414189	AGAP6	FS
GCA_001307025.1	NP_005905.2	4173	MCM4	FS
GCA_001307025.1	NP_877423.1	4173	MCM4	FS
GCA_001307025.1	NP_005928.2	4302	MLLT6	FS
GCA_001307025.1	NP_002421.3	4330	MN1	FS
GCA_001307025.1	NP_001065243.1	440145	MZT1	FS
GCA_001307025.1	NP_001013372.1	440153	OR11H12	FS
GCA_001307025.1	NP_001293023.1	440348	NPIPB15	FS
GCA_001307025.1	NP_001014440.2	440836	ODF3B	FS
GCA_001307025.1	NP_001005243.1	441639	OR9K2	FS
GCA_001307025.1	NP_001138682.1	441869	ANKRD65	FS
GCA_001307025.1	NP_001017390.1	445329	SULT1A4	FS
GCA_001307025.1	NP_001077007.1	445582	POTEE	FS
GCA_001307025.1	NP_001158238.1	463	ZFHX3	FS
GCA_001307025.1	NP_008816.3	463	ZFHX3	FS
GCA_001307025.1	NP_001120651.2	4647	MYO7A	FS
GCA_001307025.1	NP_001129494.1	4776	NFATC4	FS
GCA_001307025.1	NP_001185894.1	4776	NFATC4	FS
GCA_001307025.1	NP_001185895.1	4776	NFATC4	FS
GCA_001307025.1	NP_001185896.1	4776	NFATC4	FS
GCA_001307025.1	NP_001275731.1	4776	NFATC4	FS
GCA_001307025.1	NP_004545.2	4776	NFATC4	FS
GCA_001307025.1	NP_001231931.1	4782	NFIC	FS
GCA_001307025.1	NP_001231933.1	4782	NFIC	FS
GCA_001307025.1	NP_001231934.1	4782	NFIC	FS
GCA_001307025.1	NP_005588.2	4782	NFIC	FS
GCA_001307025.1	NP_995315.1	4782	NFIC	FS
GCA_001307025.1	NP_653300.2	480	ATP1A4	FS
GCA_001307025.1	NP_005589.1	4807	NHLH1	FS
GCA_001307025.1	NP_055331.1	4849	CNOT3	FS
GCA_001307025.1	NP_000426.2	4854	NOTCH3	FS
GCA_001307025.1	NP_004548.3	4855	NOTCH4	FS
GCA_001307025.1	NP_000262.2	4864	NPC1	FS
GCA_001307025.1	NP_004550.2	4904	YBX1	FS
GCA_001307025.1	NP_001278238.1	5046	PCSK6	FS
GCA_001307025.1	NP_002561.1	5046	PCSK6	FS
GCA_001307025.1	NP_612192.1	5046	PCSK6	FS
GCA_001307025.1	NP_612195.1	5046	PCSK6	FS
GCA_001307025.1	NP_612196.1	5046	PCSK6	FS
GCA_001307025.1	NP_612197.1	5046	PCSK6	FS
GCA_001307025.1	NP_612198.2	5046	PCSK6	FS
GCA_001307025.1	NP_056534.2	50509	COL5A3	FS
GCA_001307025.1	NP_002568.2	5062	PAK2	FS
GCA_001307025.1	NP_001001891.2	50636	ANO7	FS
GCA_001307025.1	NP_001073866.2	50651	SLC45A1	FS
GCA_001307025.1	NP_000269.2	5076	PAX2	FS
GCA_001307025.1	NP_001291498.1	5076	PAX2	FS
GCA_001307025.1	NP_003978.2	5076	PAX2	FS
GCA_001307025.1	NP_003979.2	5076	PAX2	FS
GCA_001307025.1	NP_003980.2	5076	PAX2	FS
GCA_001307025.1	NP_003981.2	5076	PAX2	FS
GCA_001307025.1	NP_001103348.1	50945	TBX22	FS
GCA_001307025.1	NP_058650.1	50945	TBX22	FS
GCA_001307025.1	NP_001264125.1	51105	PHF20L1	FS
GCA_001307025.1	NP_057102.4	51105	PHF20L1	FS
GCA_001307025.1	NP_001291651.1	51177	PLEKHO1	FS
GCA_001307025.1	NP_001291652.1	51177	PLEKHO1	FS
GCA_001307025.1	NP_001291653.1	51177	PLEKHO1	FS
GCA_001307025.1	NP_057358.2	51177	PLEKHO1	FS
GCA_001307025.1	NP_001116118.2	51252	FAM178B	FS
GCA_001307025.1	NP_057652.1	51289	RXFP3	FS
GCA_001307025.1	NP_001095272.1	51317	PHF21A	FS
GCA_001307025.1	NP_057705.3	51317	PHF21A	FS
GCA_001307025.1	NP_001257694.1	51363	CHST15	FS
GCA_001307025.1	NP_055678.2	51363	CHST15	FS
GCA_001307025.1	NP_001123356.1	51368	TEX264	FS
GCA_001307025.1	NP_001230654.1	51368	TEX264	FS
GCA_001307025.1	NP_001230655.1	51368	TEX264	FS
GCA_001307025.1	NP_001265124.1	51368	TEX264	FS
GCA_001307025.1	NP_057010.1	51368	TEX264	FS
GCA_001307025.1	NP_001005739.1	51542	VPS54	FS
GCA_001307025.1	NP_057600.2	51542	VPS54	FS
GCA_001307025.1	NP_001026871.1	51559	NT5DC3	FS
GCA_001307025.1	NP_001137252.1	51629	SLC25A39	FS
GCA_001307025.1	NP_057100.1	51629	SLC25A39	FS
GCA_001307025.1	NP_002632.1	5277	PIGA	FS
GCA_001307025.1	NP_065206.3	5277	PIGA	FS
GCA_001307025.1	NP_000287.3	5310	PKD1	FS
GCA_001307025.1	NP_001009944.2	5310	PKD1	FS
GCA_001307025.1	NP_683878.1	53354	PANK1	FS
GCA_001307025.1	NP_115618.3	5361	PLXNA1	FS
GCA_001307025.1	NP_065103.1	53831	GPR84	FS
GCA_001307025.1	NP_059129.3	53904	MYO3A	FS
GCA_001307025.1	NP_005387.2	5408	PNLIPRP2	FS
GCA_001307025.1	NP_006222.2	5426	POLE	FS
GCA_001307025.1	NP_061859.3	54436	SH3TC1	FS
GCA_001307025.1	NP_000296.2	5445	PON2	FS
GCA_001307025.1	NP_001018171.1	5445	PON2	FS
GCA_001307025.1	NP_006228.3	5457	POU4F1	FS
GCA_001307025.1	NP_060031.1	54754	NUTM2F	FS
GCA_001307025.1	NP_001136024.1	54798	DCHS2	FS
GCA_001307025.1	NP_001287875.1	54815	GATAD2A	FS
GCA_001307025.1	NP_060130.3	54815	GATAD2A	FS
GCA_001307025.1	NP_056405.2	54865	GPATCH4	FS
GCA_001307025.1	NP_872620.1	54865	GPATCH4	FS
GCA_001307025.1	NP_060200.2	54870	QRICH1	FS
GCA_001307025.1	NP_942581.1	54870	QRICH1	FS
GCA_001307025.1	NP_060208.2	54875	CNTLN	FS
GCA_001307025.1	NP_002696.3	5493	PPL	FS
GCA_001307025.1	NP_001107580.1	55001	TTC22	FS
GCA_001307025.1	NP_001230271.1	55036	CCDC40	FS
GCA_001307025.1	NP_060460.4	55066	PDPR	FS
GCA_001307025.1	NP_060478.3	55079	FEZF2	FS
GCA_001307025.1	NP_060659.3	55211	DPPA4	FS
GCA_001307025.1	NP_060828.2	55324	ABCF3	FS
GCA_001307025.1	NP_060862.3	55345	ZGRF1	FS
GCA_001307025.1	NP_001265723.1	5540	NPY4R	FS
GCA_001307025.1	NP_005963.4	5540	NPY4R	FS
GCA_001307025.1	NP_001274314.1	554282	FAM72C	FS
GCA_001307025.1	NP_938080.1	55568	GALNT10	FS
GCA_001307025.1	NP_060410.2	55672	NBPF1	FS
GCA_001307025.1	NP_060541.3	55701	ARHGEF40	FS
GCA_001307025.1	NP_001265528.1	558	AXL	FS
GCA_001307025.1	NP_001690.2	558	AXL	FS
GCA_001307025.1	NP_068713.2	558	AXL	FS
GCA_001307025.1	NP_001303256.1	5580	PRKCD	FS
GCA_001307025.1	NP_006245.2	5580	PRKCD	FS
GCA_001307025.1	NP_997704.1	5580	PRKCD	FS
GCA_001307025.1	NP_005391.1	5581	PRKCE	FS
GCA_001307025.1	NP_001263318.1	55857	KIZ	FS
GCA_001307025.1	NP_061122.4	55889	GOLGA6B	FS
GCA_001307025.1	NP_001303261.1	5606	MAP2K3	FS
GCA_001307025.1	NP_002747.2	5606	MAP2K3	FS
GCA_001307025.1	NP_659731.1	5606	MAP2K3	FS
GCA_001307025.1	NP_061720.2	56171	DNAH7	FS
GCA_001307025.1	NP_000304.2	5627	PROS1	FS
GCA_001307025.1	NP_001301006.1	5627	PROS1	FS
GCA_001307025.1	NP_001292353.1	56776	FMN2	FS
GCA_001307025.1	NP_064450.3	56776	FMN2	FS
GCA_001307025.1	NP_001106881.1	5680	PSG11	FS
GCA_001307025.1	NP_002776.3	5680	PSG11	FS
GCA_001307025.1	NP_976032.2	5680	PSG11	FS
GCA_001307025.1	NP_064548.1	56920	SEMA3G	FS
GCA_001307025.1	NP_064630.2	56995	TULP4	FS
GCA_001307025.1	NP_001167571.1	57060	PCBP4	FS
GCA_001307025.1	NP_065151.2	57060	PCBP4	FS
GCA_001307025.1	NP_127501.1	57060	PCBP4	FS
GCA_001307025.1	NP_127503.1	57060	PCBP4	FS
GCA_001307025.1	NP_001177966.1	5707	PSMD1	FS
GCA_001307025.1	NP_002798.2	5707	PSMD1	FS
GCA_001307025.1	NP_001243324.1	57127	RHBG	FS
GCA_001307025.1	NP_001243325.1	57127	RHBG	FS
GCA_001307025.1	NP_065140.3	57127	RHBG	FS
GCA_001307025.1	NP_065073.3	57221	ARFGEF3	FS
GCA_001307025.1	NP_065758.3	57467	HHATL	FS
GCA_001307025.1	NP_065770.1	57479	PRR12	FS
GCA_001307025.1	NP_065788.1	57497	LRFN2	FS
GCA_001307025.1	NP_001257327.1	5754	PTK7	FS
GCA_001307025.1	NP_002812.2	5754	PTK7	FS
GCA_001307025.1	NP_690619.1	5754	PTK7	FS
GCA_001307025.1	NP_690620.1	5754	PTK7	FS
GCA_001307025.1	NP_690621.1	5754	PTK7	FS
GCA_001307025.1	NP_056056.2	57553	MICAL3	FS
GCA_001307025.1	NP_065849.1	57558	USP35	FS
GCA_001307025.1	NP_065863.2	57572	DOCK6	FS
GCA_001307025.1	NP_065869.3	57578	UNC79	FS
GCA_001307025.1	NP_001099001.1	57579	FAM135A	FS
GCA_001307025.1	NP_001156001.1	57579	FAM135A	FS
GCA_001307025.1	NP_065870.3	57579	FAM135A	FS
GCA_001307025.1	NP_065899.1	57608	KIAA1462	FS
GCA_001307025.1	NP_065948.1	57657	HCN3	FS
GCA_001307025.1	NP_001136113.1	57666	FBRSL1	FS
GCA_001307025.1	NP_001164100.1	57680	CHD8	FS
GCA_001307025.1	NP_065971.2	57680	CHD8	FS
GCA_001307025.1	NP_001032895.2	57701	NCKAP5L	FS
GCA_001307025.1	NP_066010.1	57719	ANO8	FS
GCA_001307025.1	NP_066013.1	57722	IGDCC4	FS
GCA_001307025.1	NP_001186726.1	5778	PTPN7	FS
GCA_001307025.1	NP_002823.3	5778	PTPN7	FS
GCA_001307025.1	NP_542155.1	5778	PTPN7	FS
GCA_001307025.1	NP_005040.2	5822	PWP2	FS
GCA_001307025.1	NP_001074324.1	5829	PXN	FS
GCA_001307025.1	NP_001230685.1	5829	PXN	FS
GCA_001307025.1	NP_002850.2	5829	PXN	FS
GCA_001307025.1	NP_067047.4	58499	ZNF462	FS
GCA_001307025.1	NP_067051.2	58506	SCAF1	FS
GCA_001307025.1	NP_001230667.1	5863	RGL2	FS
GCA_001307025.1	NP_004752.1	5863	RGL2	FS
GCA_001307025.1	NP_001139129.1	5909	RAP1GAP	FS
GCA_001307025.1	NP_001139130.1	5909	RAP1GAP	FS
GCA_001307025.1	NP_002876.2	5909	RAP1GAP	FS
GCA_001307025.1	NP_000955.1	5914	RARA	FS
GCA_001307025.1	NP_001138773.1	5914	RARA	FS
GCA_001307025.1	NP_001138774.1	5914	RARA	FS
GCA_001307025.1	NP_067636.1	59339	PLEKHA2	FS
GCA_001307025.1	NP_001124317.1	604	BCL6	FS
GCA_001307025.1	NP_001128210.1	604	BCL6	FS
GCA_001307025.1	NP_001697.2	604	BCL6	FS
GCA_001307025.1	NP_001026882.2	60487	TRMT11	FS
GCA_001307025.1	NP_001030584.1	60509	AGBL5	FS
GCA_001307025.1	NP_068603.4	60509	AGBL5	FS
GCA_001307025.1	NP_064714.2	60676	PAPPA2	FS
GCA_001307025.1	NP_005397.1	6093	ROCK1	FS
GCA_001307025.1	NP_000318.1	6094	ROM1	FS
GCA_001307025.1	NP_001185.3	610	HCN2	FS
GCA_001307025.1	NP_001030025.1	6103	RPGR	FS
GCA_001307025.1	NP_001026.2	6262	RYR2	FS
GCA_001307025.1	NP_001171701.1	63035	BCORL1	FS
GCA_001307025.1	NP_068765.3	63035	BCORL1	FS
GCA_001307025.1	NP_071347.2	63891	RNF123	FS
GCA_001307025.1	NP_071349.3	63893	UBE2O	FS
GCA_001307025.1	NP_071375.1	63922	CHTF18	FS
GCA_001307025.1	NP_149042.2	63947	DMRTC1	FS
GCA_001307025.1	NP_071398.3	63977	PRDM15	FS
GCA_001307025.1	NP_071751.3	64175	P3H1	FS
GCA_001307025.1	NP_071760.2	64215	DNAJC1	FS
GCA_001307025.1	NP_067643.3	64236	PDLIM2	FS
GCA_001307025.1	NP_001177739.1	642517	AGAP9	FS
GCA_001307025.1	NP_001137447.1	642623	UBTFL1	FS
GCA_001307025.1	NP_001098549.2	64319	FBRS	FS
GCA_001307025.1	NP_001092690.1	643641	ZNF862	FS
GCA_001307025.1	NP_071926.4	64411	ARAP3	FS
GCA_001307025.1	NP_001265641.1	64422	ATG3	FS
GCA_001307025.1	NP_001116540.1	644591	PPIAL4G	FS
GCA_001307025.1	NP_001129624.1	644974	ALG1L2	FS
GCA_001307025.1	NP_001091879.1	645073	GAGE12G	FS
GCA_001307025.1	NP_001073992.1	645432	ARRDC5	FS
GCA_001307025.1	NP_001123512.1	6464	SHC1	FS
GCA_001307025.1	NP_001123513.1	6464	SHC1	FS
GCA_001307025.1	NP_001189788.1	6464	SHC1	FS
GCA_001307025.1	NP_003020.2	6464	SHC1	FS
GCA_001307025.1	NP_892113.4	6464	SHC1	FS
GCA_001307025.1	NP_001291378.1	646915	ZNF806	FS
GCA_001307025.1	NP_001257530.1	647219	ASCL5	FS
GCA_001307025.1	NP_073754.2	64881	PCDH20	FS
GCA_001307025.1	NP_004161.4	6505	SLC1A1	FS
GCA_001307025.1	NP_998820.3	65125	WNK1	FS
GCA_001307025.1	NP_001269401.1	653073	GOLGA8J	FS
GCA_001307025.1	NP_001035.1	6531	SLC6A3	FS
GCA_001307025.1	NP_001072984.1	653308	ASAH2B	FS
GCA_001307025.1	NP_001136278.1	6535	SLC6A8	FS
GCA_001307025.1	NP_001137355.1	653505	PPIAL4A	FS
GCA_001307025.1	NP_001116847.1	653604	HIST2H3D	FS
GCA_001307025.1	NP_001269397.1	653720	GOLGA8M	FS
GCA_001307025.1	NP_001264012.1	653781	POTEJ	FS
GCA_001307025.1	NP_001034201.2	654463	FER1L6	FS
GCA_001307025.1	NP_001123892.1	6601	SMARCC2	FS
GCA_001307025.1	NP_003066.2	6601	SMARCC2	FS
GCA_001307025.1	NP_620706.1	6601	SMARCC2	FS
GCA_001307025.1	NP_000335.1	6606	SMN1	FS
GCA_001307025.1	NP_075012.1	6606	SMN1	FS
GCA_001307025.1	NP_075556.1	6614	SIGLEC1	FS
GCA_001307025.1	NP_001278341.1	6651	SON	FS
GCA_001307025.1	NP_620305.2	6651	SON	FS
GCA_001307025.1	NP_000050.2	675	BRCA2	FS
GCA_001307025.1	NP_005410.1	6773	STAT2	FS
GCA_001307025.1	NP_938146.1	6773	STAT2	FS
GCA_001307025.1	NP_001259025.1	6810	STX4	FS
GCA_001307025.1	NP_055047.2	6844	VAMP2	FS
GCA_001307025.1	NP_001139755.1	6934	TCF7L2	FS
GCA_001307025.1	NP_733796.2	7050	TGIF1	FS
GCA_001307025.1	NP_003250.3	7087	ICAM5	FS
GCA_001307025.1	NP_061978.6	7148	TNXB	FS
GCA_001307025.1	NP_954868.1	7179	TPTE	FS
GCA_001307025.1	NP_954869.1	7179	TPTE	FS
GCA_001307025.1	NP_954870.2	7179	TPTE	FS
GCA_001307025.1	NP_001243779.1	7273	TTN	FS
GCA_001307025.1	NP_001254479.2	7273	TTN	FS
GCA_001307025.1	NP_003310.4	7273	TTN	FS
GCA_001307025.1	NP_596869.4	7273	TTN	FS
GCA_001307025.1	NP_597676.3	7273	TTN	FS
GCA_001307025.1	NP_597681.4	7273	TTN	FS
GCA_001307025.1	NP_001138476.2	727832	GOLGA6L6	FS
GCA_001307025.1	NP_001093155.1	727940	RHOXF2B	FS
GCA_001307025.1	NP_001092808.1	728118	NUTM2A	FS
GCA_001307025.1	NP_001092270.1	728239	MAGED4	FS
GCA_001307025.1	NP_001258990.1	728239	MAGED4	FS
GCA_001307025.1	NP_001258991.1	728239	MAGED4	FS
GCA_001307025.1	NP_001258992.1	728239	MAGED4	FS
GCA_001307025.1	NP_001229256.1	728369	USP17L24	FS
GCA_001307025.1	NP_001155843.1	728392	LOC728392	FS
GCA_001307025.1	NP_001269453.1	728741	NPIPB6	FS
GCA_001307025.1	NP_001032590.2	728841	NBPF8	FS
GCA_001307025.1	NP_001265424.1	729262	NUTM2B	FS
GCA_001307025.1	NP_001019832.2	729528	PRAMEF14	FS
GCA_001307025.1	NP_001297067.1	729587	FAM231C	FS
GCA_001307025.1	NP_001071638.2	729857	RGPD2	FS
GCA_001307025.1	NP_003326.2	7318	UBA7	FS
GCA_001307025.1	NP_066933.1	7373	COL14A1	FS
GCA_001307025.1	NP_001120864.1	745	MYRF	FS
GCA_001307025.1	NP_037411.1	745	MYRF	FS
GCA_001307025.1	NP_001035889.1	7468	WHSC1	FS
GCA_001307025.1	NP_579877.1	7468	WHSC1	FS
GCA_001307025.1	NP_579878.1	7468	WHSC1	FS
GCA_001307025.1	NP_579890.1	7468	WHSC1	FS
GCA_001307025.1	NP_003384.2	7479	WNT8B	FS
GCA_001307025.1	NP_001161076.1	7511	XPNPEP1	FS
GCA_001307025.1	NP_065116.3	7511	XPNPEP1	FS
GCA_001307025.1	NP_004330.1	754	PTTG1IP	FS
GCA_001307025.1	NP_001171555.1	7543	ZFX	FS
GCA_001307025.1	NP_001171556.1	7543	ZFX	FS
GCA_001307025.1	NP_001171557.1	7543	ZFX	FS
GCA_001307025.1	NP_003401.2	7543	ZFX	FS
GCA_001307025.1	NP_008894.2	7570	ZNF22	FS
GCA_001307025.1	NP_005655.1	7681	MKRN3	FS
GCA_001307025.1	NP_001208.2	770	CA11	FS
GCA_001307025.1	NP_000059.3	773	CACNA1A	FS
GCA_001307025.1	NP_001120693.1	773	CACNA1A	FS
GCA_001307025.1	NP_001120694.1	773	CACNA1A	FS
GCA_001307025.1	NP_001167551.1	773	CACNA1A	FS
GCA_001307025.1	NP_075461.2	773	CACNA1A	FS
GCA_001307025.1	NP_077284.2	79154	DHRS11	FS
GCA_001307025.1	NP_001184216.1	79334	OR11H2	FS
GCA_001307025.1	NP_001180457.1	79634	SCRN3	FS
GCA_001307025.1	NP_078859.2	79634	SCRN3	FS
GCA_001307025.1	NP_078903.3	79680	C22orf29	FS
GCA_001307025.1	NP_891554.1	79778	MICALL2	FS
GCA_001307025.1	NP_001027026.1	79836	LONRF3	FS
GCA_001307025.1	NP_001276038.1	79836	LONRF3	FS
GCA_001307025.1	NP_079054.3	79836	LONRF3	FS
GCA_001307025.1	NP_005426.2	7984	ARHGEF5	FS
GCA_001307025.1	NP_387504.2	79937	CNTNAP3	FS
GCA_001307025.1	NP_001277260.1	79958	DENND1C	FS
GCA_001307025.1	NP_079174.2	79958	DENND1C	FS
GCA_001307025.1	NP_001026892.1	79969	ATAT1	FS
GCA_001307025.1	NP_001296171.1	80022	MYO15B	FS
GCA_001307025.1	NP_079384.2	80178	C16orf59	FS
GCA_001307025.1	NP_031397.1	8019	BRD3	FS
GCA_001307025.1	NP_001153699.1	80208	SPG11	FS
GCA_001307025.1	NP_079413.3	80208	SPG11	FS
GCA_001307025.1	NP_001255968.1	8036	SHOC2	FS
GCA_001307025.1	NP_031399.2	8036	SHOC2	FS
GCA_001307025.1	NP_001229291.1	81557	MAGED4B	FS
GCA_001307025.1	NP_110428.2	81557	MAGED4B	FS
GCA_001307025.1	NP_803879.1	81557	MAGED4B	FS
GCA_001307025.1	NP_803881.1	81557	MAGED4B	FS
GCA_001307025.1	NP_112193.1	81623	DEFB126	FS
GCA_001307025.1	NP_570116.2	8174	MADCAM1	FS
GCA_001307025.1	NP_570118.1	8174	MADCAM1	FS
GCA_001307025.1	NP_112214.2	81788	NUAK2	FS
GCA_001307025.1	NP_112243.1	81876	RAB1B	FS
GCA_001307025.1	NP_006758.2	8216	LZTR1	FS
GCA_001307025.1	NP_073210.1	8220	DGCR14	FS
GCA_001307025.1	NP_001191395.1	8241	RBM10	FS
GCA_001307025.1	NP_001191396.1	8241	RBM10	FS
GCA_001307025.1	NP_001191397.1	8241	RBM10	FS
GCA_001307025.1	NP_005667.2	8241	RBM10	FS
GCA_001307025.1	NP_690595.1	8241	RBM10	FS
GCA_001307025.1	NP_004647.1	8314	BAP1	FS
GCA_001307025.1	NP_114119.2	83850	ESYT3	FS
GCA_001307025.1	NP_001277141.1	83882	TSPAN10	FS
GCA_001307025.1	NP_114151.3	83882	TSPAN10	FS
GCA_001307025.1	NP_114163.1	83895	KRTAP1-5	FS
GCA_001307025.1	NP_001139632.1	83940	TATDN1	FS
GCA_001307025.1	NP_114415.1	83940	TATDN1	FS
GCA_001307025.1	NP_001004426.1	8398	PLA2G6	FS
GCA_001307025.1	NP_001186491.1	8398	PLA2G6	FS
GCA_001307025.1	NP_003551.2	8398	PLA2G6	FS
GCA_001307025.1	NP_114429.2	83987	CCDC8	FS
GCA_001307025.1	NP_001257951.1	84126	ATRIP	FS
GCA_001307025.1	NP_001257952.1	84126	ATRIP	FS
GCA_001307025.1	NP_115542.2	84126	ATRIP	FS
GCA_001307025.1	NP_569055.1	84126	ATRIP	FS
GCA_001307025.1	NP_115626.2	84210	ANKRD20A1	FS
GCA_001307025.1	NP_115634.3	84218	TBC1D3F	FS
GCA_001307025.1	NP_115712.1	84296	GINS4	FS
GCA_001307025.1	NP_001128650.1	84307	ZNF397	FS
GCA_001307025.1	NP_001120730.1	84439	HHIPL1	FS
GCA_001307025.1	NP_115871.1	84444	DOT1L	FS
GCA_001307025.1	NP_115805.1	84445	LZTS2	FS
GCA_001307025.1	NP_001155179.1	84623	KIRREL3	FS
GCA_001307025.1	NP_001243587.1	8463	TEAD2	FS
GCA_001307025.1	NP_001243588.1	8463	TEAD2	FS
GCA_001307025.1	NP_001243589.1	8463	TEAD2	FS
GCA_001307025.1	NP_001243590.1	8463	TEAD2	FS
GCA_001307025.1	NP_001243591.1	8463	TEAD2	FS
GCA_001307025.1	NP_003589.1	8463	TEAD2	FS
GCA_001307025.1	NP_001001936.1	84632	AFAP1L2	FS
GCA_001307025.1	NP_001274753.1	84632	AFAP1L2	FS
GCA_001307025.1	NP_115939.1	84632	AFAP1L2	FS
GCA_001307025.1	NP_115964.2	84662	GLIS2	FS
GCA_001307025.1	NP_001073160.1	84689	MS4A14	FS
GCA_001307025.1	NP_001248756.1	84689	MS4A14	FS
GCA_001307025.1	NP_001248757.1	84689	MS4A14	FS
GCA_001307025.1	NP_115986.3	84689	MS4A14	FS
GCA_001307025.1	NP_116062.2	84759	PCGF1	FS
GCA_001307025.1	NP_001245381.1	84893	FBXO18	FS
GCA_001307025.1	NP_001245382.1	84893	FBXO18	FS
GCA_001307025.1	NP_116196.3	84893	FBXO18	FS
GCA_001307025.1	NP_835363.1	84893	FBXO18	FS
GCA_001307025.1	NP_001070736.1	84936	ZFYVE19	FS
GCA_001307025.1	NP_001245349.1	84936	ZFYVE19	FS
GCA_001307025.1	NP_001171835.1	84961	FBXL20	FS
GCA_001307025.1	NP_116264.2	84961	FBXL20	FS
GCA_001307025.1	NP_001273420.1	84978	FRMD5	FS
GCA_001307025.1	NP_116281.2	84978	FRMD5	FS
GCA_001307025.1	NP_001099010.1	8525	DGKZ	FS
GCA_001307025.1	NP_001186195.1	8525	DGKZ	FS
GCA_001307025.1	NP_001186196.1	8525	DGKZ	FS
GCA_001307025.1	NP_001186197.1	8525	DGKZ	FS
GCA_001307025.1	NP_003637.2	8525	DGKZ	FS
GCA_001307025.1	NP_963290.1	8525	DGKZ	FS
GCA_001307025.1	NP_963291.2	8525	DGKZ	FS
GCA_001307025.1	NP_277052.1	85358	SHANK3	FS
GCA_001307025.1	NP_056487.1	85376	RIMBP3	FS
GCA_001307025.1	NP_065194.2	85378	TUBGCP6	FS
GCA_001307025.1	NP_207646.2	85446	ZFHX2	FS
GCA_001307025.1	NP_203754.2	85456	TNKS1BP1	FS
GCA_001307025.1	NP_001009812.1	85474	LBX2	FS
GCA_001307025.1	NP_003671.1	8565	YARS	FS
GCA_001307025.1	NP_001278908.1	8602	NOP14	FS
GCA_001307025.1	NP_003705.1	8614	STC2	FS
GCA_001307025.1	NP_003773.1	8705	B3GALT4	FS
GCA_001307025.1	NP_001092872.1	8812	CCNK	FS
GCA_001307025.1	NP_003911.2	8914	TIMELESS	FS
GCA_001307025.1	NP_003449.2	8927	BSN	FS
GCA_001307025.1	NP_003914.1	8928	FOXH1	FS
GCA_001307025.1	NP_001017973.1	8974	P4HA2	FS
GCA_001307025.1	NP_001017974.1	8974	P4HA2	FS
GCA_001307025.1	NP_001136070.1	8974	P4HA2	FS
GCA_001307025.1	NP_258260.1	89848	FCHSD1	FS
GCA_001307025.1	NP_443729.1	89858	SIGLEC12	FS
GCA_001307025.1	NP_001243556.1	9024	BRSK2	FS
GCA_001307025.1	NP_001243558.1	9024	BRSK2	FS
GCA_001307025.1	NP_001243559.1	9024	BRSK2	FS
GCA_001307025.1	NP_001269147.1	9024	BRSK2	FS
GCA_001307025.1	NP_003948.2	9024	BRSK2	FS
GCA_001307025.1	NP_001127912.1	91392	ZNF502	FS
GCA_001307025.1	NP_001127913.1	91392	ZNF502	FS
GCA_001307025.1	NP_001127914.1	91392	ZNF502	FS
GCA_001307025.1	NP_001269809.1	91392	ZNF502	FS
GCA_001307025.1	NP_149987.2	91392	ZNF502	FS
GCA_001307025.1	NP_065962.1	91584	PLXNA4	FS
GCA_001307025.1	NP_004713.2	9179	AP4M1	FS
GCA_001307025.1	NP_001074444.1	9185	REPS2	FS
GCA_001307025.1	NP_004717.2	9185	REPS2	FS
GCA_001307025.1	NP_004723.2	9196	KCNAB3	FS
GCA_001307025.1	NP_001164633.1	9203	ZMYM3	FS
GCA_001307025.1	NP_005087.1	9203	ZMYM3	FS
GCA_001307025.1	NP_963893.1	9203	ZMYM3	FS
GCA_001307025.1	NP_612392.1	92154	MTSS1L	FS
GCA_001307025.1	NP_001276908.1	9253	NUMBL	FS
GCA_001307025.1	NP_001276909.1	9253	NUMBL	FS
GCA_001307025.1	NP_004747.1	9253	NUMBL	FS
GCA_001307025.1	NP_008916.2	9284	NPIPA1	FS
GCA_001307025.1	NP_612405.2	92979	2016-03-09	FS
GCA_001307025.1	NP_078966.2	94025	MUC16	FS
GCA_001307025.1	NP_057461.2	9465	AKAP7	FS
GCA_001307025.1	NP_001171864.1	9542	NRG2	FS
GCA_001307025.1	NP_004874.1	9542	NRG2	FS
GCA_001307025.1	NP_053584.1	9542	NRG2	FS
GCA_001307025.1	NP_053585.1	9542	NRG2	FS
GCA_001307025.1	NP_053586.1	9542	NRG2	FS
GCA_001307025.1	NP_004881.2	9552	SPAG7	FS
GCA_001307025.1	NP_004277.2	9567	GTPBP1	FS
GCA_001307025.1	NP_001070729.2	9612	NCOR2	FS
GCA_001307025.1	NP_001193583.1	9612	NCOR2	FS
GCA_001307025.1	NP_006303.4	9612	NCOR2	FS
GCA_001307025.1	NP_001008738.2	96459	FNIP1	FS
GCA_001307025.1	NP_588613.2	96459	FNIP1	FS
GCA_001307025.1	NP_055454.1	9652	TTC37	FS
GCA_001307025.1	NP_277049.1	96626	LIMS3	FS
GCA_001307025.1	NP_055464.1	9667	SAFB2	FS
GCA_001307025.1	NP_001124330.1	9677	PPIP5K1	FS
GCA_001307025.1	NP_001124331.1	9677	PPIP5K1	FS
GCA_001307025.1	NP_001177143.1	9677	PPIP5K1	FS
GCA_001307025.1	NP_055474.3	9677	PPIP5K1	FS
GCA_001307025.1	NP_055511.2	9721	GPRIN2	FS
GCA_001307025.1	NP_001077086.1	9821	RB1CC1	FS
GCA_001307025.1	NP_055596.3	9821	RB1CC1	FS
GCA_001307025.1	NP_055649.4	9884	LRRC37A	FS
GCA_001307025.1	NP_001265578.1	9885	OSBPL2	FS
GCA_001307025.1	NP_055650.1	9885	OSBPL2	FS
GCA_001307025.1	NP_653081.1	9885	OSBPL2	FS
GCA_001307025.1	NP_055670.1	9907	AP5Z1	FS
GCA_001307025.1	NP_001127854.1	9922	IQSEC1	FS
GCA_001307025.1	NP_001120932.1	9924	PAN2	FS
GCA_001307025.1	NP_001159751.1	9924	PAN2	FS
GCA_001307025.1	NP_055686.3	9924	PAN2	FS
GCA_001307025.1	NP_005453.2	9947	MAGEC1	FS
GCA_001307025.1	NP_005111.2	9968	MED12	FS
GCF_000306695.2	NP_001297084.1	100133301	FAM231B	FS
GCF_000306695.2	NP_001265516.1	100134391	LOC100134391	FS
GCF_000306695.2	NP_001159811.1	100310812	SPDYE2B	FS
GCF_000306695.2	NP_005484.2	10048	RANBP9	FS
[truncated: 236 more rows]
