# Supplementary material for: Evaluation of GRCh38 and de novo haploid genome assemblies demonstrates the enduring quality of the reference assembly
Source: Genome Res. 2017 May;27(5):849–64. doi: 10.1101/gr.213611.116 (PMC5411779; doi:10.1101/gr.213611.116)
Supplement: Supplemental Material [file supp_gr.213611.116_Supplemental_Worksheet_S6.xlsx]

## Sheet: unaligned_seqs_primary
#Accession	GeneID	Assembly
NM_012146.1	26584	GRCh38
NM_022555.3	3125	GRCh38
NM_021983.4	3126	GRCh38
NM_001013357.1	504190	GRCh38
NM_012148.2	26582	GRCh38
NM_012149.2	26581	GRCh38
NM_020535.3	57292	GRCh38
NM_001018081.1	553128	GRCh38
NR_036753.1	401983	GRCh38
NM_001243965.1	3123	GRCh38
NM_176886.2	259291	GRCh38
NM_001013356.2	504189	GRCh38
NM_000853.3	2952	GRCh38
NM_001293807.1	2952	GRCh38
NM_001293808.1	2952	GRCh38
NM_001293809.1	2952	GRCh38
NM_001293810.1	2952	GRCh38
NM_001293811.1	2952	GRCh38
NM_001293812.1	2952	GRCh38
NM_001293813.1	2952	GRCh38
NM_001293814.1	2952	GRCh38
NR_132348.1	106099130	GRCh38
NM_012146.1	26584	CHM1_1.1
NM_022555.3	3125	CHM1_1.1
NM_178433.1	353143	CHM1_1.1
NM_021983.4	3126	CHM1_1.1
NM_001005922.1	387264	CHM1_1.1
NM_001013357.1	504190	CHM1_1.1
NM_012148.2	26582	CHM1_1.1
NM_012149.2	26581	CHM1_1.1
NM_020535.3	57292	CHM1_1.1
NM_001018081.1	553128	CHM1_1.1
NM_001024601.2	149643	CHM1_1.1
NR_003054.1	692106	CHM1_1.1
NM_176884.2	259289	CHM1_1.1
NM_001001480.2	439915	CHM1_1.1
NM_001080835.1	643905	CHM1_1.1
NR_003285.2	100008587	CHM1_1.1
NR_002754.2	26829	CHM1_1.1
NM_003435.3	7693	CHM1_1.1
NM_031963.2	83901	CHM1_1.1
NR_003682.1	403340	CHM1_1.1
NR_003711.1	100124541	CHM1_1.1
NR_002743.2	26799	CHM1_1.1
NM_018300.3	55769	CHM1_1.1
NR_004846.2	100134868	CHM1_1.1
NR_024044.2	245912	CHM1_1.1
NR_002716.3	6066	CHM1_1.1
NM_178434.2	353144	CHM1_1.1
NR_030330.1	693127	CHM1_1.1
NR_031630.1	100302275	CHM1_1.1
NR_034004.1	100132741	CHM1_1.1
NR_034005.1	441501	CHM1_1.1
NR_036238.1	100422826	CHM1_1.1
NR_036753.1	401983	CHM1_1.1
NR_037425.1	100500842	CHM1_1.1
NM_001910.3	1510	CHM1_1.1
NM_148964.2	1510	CHM1_1.1
NM_001242480.1	389831	CHM1_1.1
NR_038958.1	100507412	CHM1_1.1
NM_001243965.1	3123	CHM1_1.1
NR_049860.1	100847058	CHM1_1.1
NR_102368.1	101340250	CHM1_1.1
NM_001013356.2	504189	CHM1_1.1
NM_180699.3	11066	CHM1_1.1
NM_022717.3	11066	CHM1_1.1
NR_104103.1	11066	CHM1_1.1
NM_001286997.1	101928436	CHM1_1.1
NR_106951.1	102465537	CHM1_1.1
NR_107057.1	102465906	CHM1_1.1
NR_107031.1	102465866	CHM1_1.1
NR_106735.1	102464835	CHM1_1.1
NR_109758.1	644919	CHM1_1.1
NM_178356.3	199834	CHM1_1.1
NM_001080514.2	642658	CHM1_1.1
NR_110592.1	102723927	CHM1_1.1
NR_110984.1	103021296	CHM1_1.1
NR_110983.1	103021296	CHM1_1.1
NM_001291516.1	399693	CHM1_1.1
NR_111982.1	399693	CHM1_1.1
NR_027454.2	731656	CHM1_1.1
NR_027434.2	100131532	CHM1_1.1
NM_130777.2	9502	CHM1_1.1
NM_000853.3	2952	CHM1_1.1
NM_001293807.1	2952	CHM1_1.1
NM_001293808.1	2952	CHM1_1.1
NM_001293809.1	2952	CHM1_1.1
NM_001293810.1	2952	CHM1_1.1
NM_001293811.1	2952	CHM1_1.1
NM_001293812.1	2952	CHM1_1.1
NM_001293813.1	2952	CHM1_1.1
NM_001293814.1	2952	CHM1_1.1
NM_001301188.1	57761	CHM1_1.1
NM_001301190.1	57761	CHM1_1.1
NM_001301193.1	57761	CHM1_1.1
NM_001301196.1	57761	CHM1_1.1
NR_036245.2	100422858	CHM1_1.1
NR_031600.2	100302196	CHM1_1.1
NR_128706.1	100526648	CHM1_1.1
NR_106782.1	102465433	CHM1_1.1
NR_128716.1	103504739	CHM1_1.1
NR_128717.1	103504733	CHM1_1.1
NR_128715.1	103504727	CHM1_1.1
NR_024086.2	53844	CHM1_1.1
NR_130463.1	100422838	CHM1_1.1
NM_145058.2	196383	CHM1_1.1
NR_130703.1	196383	CHM1_1.1
NM_001304839.1	338382	CHM1_1.1
NM_177403.5	338382	CHM1_1.1
NM_001164522.2	338382	CHM1_1.1
NR_132348.1	106099130	CHM1_1.1
NR_000018.1	26816	CHM13 CA Conservative 2.5% Error
NM_002125.3	3127	CHM13 CA Conservative 2.5% Error
NR_001298.1	3128	CHM13 CA Conservative 2.5% Error
NM_021983.4	3126	CHM13 CA Conservative 2.5% Error
NM_001012710.1	387273	CHM13 CA Conservative 2.5% Error
NM_001013357.1	504190	CHM13 CA Conservative 2.5% Error
NM_020535.3	57292	CHM13 CA Conservative 2.5% Error
NM_001018081.1	553128	CHM13 CA Conservative 2.5% Error
NM_001040071.1	650293	CHM13 CA Conservative 2.5% Error
NR_003054.1	692106	CHM13 CA Conservative 2.5% Error
NM_176884.2	259289	CHM13 CA Conservative 2.5% Error
NM_177455.3	168620	CHM13 CA Conservative 2.5% Error
NM_001001480.2	439915	CHM13 CA Conservative 2.5% Error
NM_033260.3	94234	CHM13 CA Conservative 2.5% Error
NM_005416.2	6707	CHM13 CA Conservative 2.5% Error
NM_001097589.1	6707	CHM13 CA Conservative 2.5% Error
NM_031963.2	83901	CHM13 CA Conservative 2.5% Error
NR_024044.2	245912	CHM13 CA Conservative 2.5% Error
NR_028064.1	100130386	CHM13 CA Conservative 2.5% Error
NM_031960.2	728224	CHM13 CA Conservative 2.5% Error
NR_002755.3	26830	CHM13 CA Conservative 2.5% Error
NR_030351.1	693205	CHM13 CA Conservative 2.5% Error
NR_031688.1	100302277	CHM13 CA Conservative 2.5% Error
NR_031689.1	100302186	CHM13 CA Conservative 2.5% Error
NR_036233.1	100422952	CHM13 CA Conservative 2.5% Error
NR_036238.1	100422826	CHM13 CA Conservative 2.5% Error
NR_036753.1	401983	CHM13 CA Conservative 2.5% Error
NR_037469.1	100500906	CHM13 CA Conservative 2.5% Error
NM_001129895.2	100128124	CHM13 CA Conservative 2.5% Error
NR_039836.1	100616437	CHM13 CA Conservative 2.5% Error
NR_039670.1	100616389	CHM13 CA Conservative 2.5% Error
NR_002728.3	10984	CHM13 CA Conservative 2.5% Error
NR_049859.1	100847001	CHM13 CA Conservative 2.5% Error
NR_049860.1	100847058	CHM13 CA Conservative 2.5% Error
NR_002185.3	79315	CHM13 CA Conservative 2.5% Error
NM_001277331.1	100507608	CHM13 CA Conservative 2.5% Error
NM_001013356.2	504189	CHM13 CA Conservative 2.5% Error
NR_106951.1	102465537	CHM13 CA Conservative 2.5% Error
NR_106781.1	102465432	CHM13 CA Conservative 2.5% Error
NR_106735.1	102464835	CHM13 CA Conservative 2.5% Error
NR_110999.1	653123	CHM13 CA Conservative 2.5% Error
NR_026803.2	401507	CHM13 CA Conservative 2.5% Error
NR_120606.1	103344926	CHM13 CA Conservative 2.5% Error
NR_126004.1	283140	CHM13 CA Conservative 2.5% Error
NR_036245.2	100422858	CHM13 CA Conservative 2.5% Error
NR_031600.2	100302196	CHM13 CA Conservative 2.5% Error
NR_000018.1	26816	CHM13 Default 5% Error
NM_002125.3	3127	CHM13 Default 5% Error
NR_001298.1	3128	CHM13 Default 5% Error
NM_021983.4	3126	CHM13 Default 5% Error
NM_001012710.1	387273	CHM13 Default 5% Error
NM_001013357.1	504190	CHM13 Default 5% Error
NR_002311.1	391518	CHM13 Default 5% Error
NM_020535.3	57292	CHM13 Default 5% Error
NM_001018081.1	553128	CHM13 Default 5% Error
NR_003054.1	692106	CHM13 Default 5% Error
NM_176884.2	259289	CHM13 Default 5% Error
NM_177455.3	168620	CHM13 Default 5% Error
NM_001001480.2	439915	CHM13 Default 5% Error
NM_033260.3	94234	CHM13 Default 5% Error
NM_005416.2	6707	CHM13 Default 5% Error
NM_001097589.1	6707	CHM13 Default 5% Error
NM_031963.2	83901	CHM13 Default 5% Error
NR_004846.2	100134868	CHM13 Default 5% Error
NR_026657.1	100240734	CHM13 Default 5% Error
NR_028064.1	100130386	CHM13 Default 5% Error
NM_031960.2	728224	CHM13 Default 5% Error
NR_002755.3	26830	CHM13 Default 5% Error
NR_030351.1	693205	CHM13 Default 5% Error
NR_031689.1	100302186	CHM13 Default 5% Error
NR_027347.1	100271874	CHM13 Default 5% Error
NR_036097.1	100422884	CHM13 Default 5% Error
NR_036233.1	100422952	CHM13 Default 5% Error
NR_036238.1	100422826	CHM13 Default 5% Error
NR_036753.1	401983	CHM13 Default 5% Error
NR_037469.1	100500906	CHM13 Default 5% Error
NM_001129895.2	100128124	CHM13 Default 5% Error
NR_039836.1	100616437	CHM13 Default 5% Error
NR_039670.1	100616389	CHM13 Default 5% Error
NR_002728.3	10984	CHM13 Default 5% Error
NR_049859.1	100847001	CHM13 Default 5% Error
NR_049860.1	100847058	CHM13 Default 5% Error
NM_001277331.1	100507608	CHM13 Default 5% Error
NM_001013356.2	504189	CHM13 Default 5% Error
NR_104075.1	101954266	CHM13 Default 5% Error
NR_104076.1	101954267	CHM13 Default 5% Error
NR_106951.1	102465537	CHM13 Default 5% Error
NR_106781.1	102465432	CHM13 Default 5% Error
NR_106735.1	102464835	CHM13 Default 5% Error
NR_104086.2	101954277	CHM13 Default 5% Error
NR_110999.1	653123	CHM13 Default 5% Error
NR_026803.2	401507	CHM13 Default 5% Error
NR_120606.1	103344926	CHM13 Default 5% Error
NR_036245.2	100422858	CHM13 Default 5% Error
NR_031600.2	100302196	CHM13 Default 5% Error
NR_036061.2	100423008	CHM13 Default 5% Error
NM_013357.2	29942	CHM13 CA Sensitive 5% Error
NR_000018.1	26816	CHM13 CA Sensitive 5% Error
NM_002125.3	3127	CHM13 CA Sensitive 5% Error
NR_001298.1	3128	CHM13 CA Sensitive 5% Error
NM_021983.4	3126	CHM13 CA Sensitive 5% Error
NM_001012710.1	387273	CHM13 CA Sensitive 5% Error
NM_001013357.1	504190	CHM13 CA Sensitive 5% Error
NM_020535.3	57292	CHM13 CA Sensitive 5% Error
NM_001018081.1	553128	CHM13 CA Sensitive 5% Error
NR_003054.1	692106	CHM13 CA Sensitive 5% Error
NM_176884.2	259289	CHM13 CA Sensitive 5% Error
NM_001001480.2	439915	CHM13 CA Sensitive 5% Error
NM_005416.2	6707	CHM13 CA Sensitive 5% Error
NM_001097589.1	6707	CHM13 CA Sensitive 5% Error
NM_031963.2	83901	CHM13 CA Sensitive 5% Error
NR_004846.2	100134868	CHM13 CA Sensitive 5% Error
NR_026657.1	100240734	CHM13 CA Sensitive 5% Error
NR_003668.2	641517	CHM13 CA Sensitive 5% Error
NR_028064.1	100130386	CHM13 CA Sensitive 5% Error
NM_031960.2	728224	CHM13 CA Sensitive 5% Error
NR_002755.3	26830	CHM13 CA Sensitive 5% Error
NR_030351.1	693205	CHM13 CA Sensitive 5% Error
NR_031689.1	100302186	CHM13 CA Sensitive 5% Error
NR_027347.1	100271874	CHM13 CA Sensitive 5% Error
NR_036097.1	100422884	CHM13 CA Sensitive 5% Error
NR_036238.1	100422826	CHM13 CA Sensitive 5% Error
NR_036753.1	401983	CHM13 CA Sensitive 5% Error
NR_037460.1	100500846	CHM13 CA Sensitive 5% Error
NR_037469.1	100500906	CHM13 CA Sensitive 5% Error
NM_001129895.2	100128124	CHM13 CA Sensitive 5% Error
NR_039836.1	100616437	CHM13 CA Sensitive 5% Error
NR_039670.1	100616389	CHM13 CA Sensitive 5% Error
NR_002728.3	10984	CHM13 CA Sensitive 5% Error
NR_049859.1	100847001	CHM13 CA Sensitive 5% Error
NR_049860.1	100847058	CHM13 CA Sensitive 5% Error
NM_001009931.2	388697	CHM13 CA Sensitive 5% Error
NM_001277331.1	100507608	CHM13 CA Sensitive 5% Error
NM_001013356.2	504189	CHM13 CA Sensitive 5% Error
NR_104076.1	101954267	CHM13 CA Sensitive 5% Error
NR_106951.1	102465537	CHM13 CA Sensitive 5% Error
NR_106781.1	102465432	CHM13 CA Sensitive 5% Error
NR_106735.1	102464835	CHM13 CA Sensitive 5% Error
NR_110999.1	653123	CHM13 CA Sensitive 5% Error
NR_026803.2	401507	CHM13 CA Sensitive 5% Error
NR_120606.1	103344926	CHM13 CA Sensitive 5% Error
NR_125886.1	101927636	CHM13 CA Sensitive 5% Error
NR_036245.2	100422858	CHM13 CA Sensitive 5% Error
NR_031600.2	100302196	CHM13 CA Sensitive 5% Error
NR_036061.2	100423008	CHM13 CA Sensitive 5% Error
NR_000018.1	26816	CHM13 CA Sensitive 2.5% Error
NM_002125.3	3127	CHM13 CA Sensitive 2.5% Error
NR_001298.1	3128	CHM13 CA Sensitive 2.5% Error
NM_021983.4	3126	CHM13 CA Sensitive 2.5% Error
NM_001012710.1	387273	CHM13 CA Sensitive 2.5% Error
NM_001013357.1	504190	CHM13 CA Sensitive 2.5% Error
NM_020535.3	57292	CHM13 CA Sensitive 2.5% Error
NM_001018081.1	553128	CHM13 CA Sensitive 2.5% Error
NR_003054.1	692106	CHM13 CA Sensitive 2.5% Error
NM_005683.3	9290	CHM13 CA Sensitive 2.5% Error
NM_176884.2	259289	CHM13 CA Sensitive 2.5% Error
NM_001001480.2	439915	CHM13 CA Sensitive 2.5% Error
NM_005416.2	6707	CHM13 CA Sensitive 2.5% Error
NM_001097589.1	6707	CHM13 CA Sensitive 2.5% Error
NM_031963.2	83901	CHM13 CA Sensitive 2.5% Error
NM_021805.2	59307	CHM13 CA Sensitive 2.5% Error
NM_001135053.1	59307	CHM13 CA Sensitive 2.5% Error
NM_001135054.1	59307	CHM13 CA Sensitive 2.5% Error
NR_028064.1	100130386	CHM13 CA Sensitive 2.5% Error
NM_031960.2	728224	CHM13 CA Sensitive 2.5% Error
NR_002755.3	26830	CHM13 CA Sensitive 2.5% Error
NR_030351.1	693205	CHM13 CA Sensitive 2.5% Error
NR_036097.1	100422884	CHM13 CA Sensitive 2.5% Error
NR_036238.1	100422826	CHM13 CA Sensitive 2.5% Error
NR_036753.1	401983	CHM13 CA Sensitive 2.5% Error
NR_037469.1	100500906	CHM13 CA Sensitive 2.5% Error
NM_001129895.2	100128124	CHM13 CA Sensitive 2.5% Error
NR_038205.1	100616530	CHM13 CA Sensitive 2.5% Error
NR_039836.1	100616437	CHM13 CA Sensitive 2.5% Error
NR_039670.1	100616389	CHM13 CA Sensitive 2.5% Error
NM_153456.3	266722	CHM13 CA Sensitive 2.5% Error
NR_002728.3	10984	CHM13 CA Sensitive 2.5% Error
NR_049859.1	100847001	CHM13 CA Sensitive 2.5% Error
NR_049860.1	100847058	CHM13 CA Sensitive 2.5% Error
NM_001009931.2	388697	CHM13 CA Sensitive 2.5% Error
NM_001277331.1	100507608	CHM13 CA Sensitive 2.5% Error
NR_103545.1	338436	CHM13 CA Sensitive 2.5% Error
NM_001013356.2	504189	CHM13 CA Sensitive 2.5% Error
NR_104075.1	101954266	CHM13 CA Sensitive 2.5% Error
NR_104076.1	101954267	CHM13 CA Sensitive 2.5% Error
NR_106951.1	102465537	CHM13 CA Sensitive 2.5% Error
NR_106781.1	102465432	CHM13 CA Sensitive 2.5% Error
NR_106735.1	102464835	CHM13 CA Sensitive 2.5% Error
NR_110999.1	653123	CHM13 CA Sensitive 2.5% Error
NR_026803.2	401507	CHM13 CA Sensitive 2.5% Error
NR_120606.1	103344926	CHM13 CA Sensitive 2.5% Error
NR_036245.2	100422858	CHM13 CA Sensitive 2.5% Error
NR_031600.2	100302196	CHM13 CA Sensitive 2.5% Error
NM_007183.3	11187	CHM13 CA Sensitive 2.5% Error
NM_001303029.1	11187	CHM13 CA Sensitive 2.5% Error
NM_012360.1	4992	CHM13 Draft Assembly
NR_000018.1	26816	CHM13 Draft Assembly
NM_002125.3	3127	CHM13 Draft Assembly
NR_001288.1	260341	CHM13 Draft Assembly
NR_001298.1	3128	CHM13 Draft Assembly
NM_006397.2	10535	CHM13 Draft Assembly
NM_203412.1	164153	CHM13 Draft Assembly
NM_001687.4	513	CHM13 Draft Assembly
NM_001001975.1	513	CHM13 Draft Assembly
NM_021983.4	3126	CHM13 Draft Assembly
NM_002258.2	3820	CHM13 Draft Assembly
NM_001012710.1	387273	CHM13 Draft Assembly
NM_001013355.1	391211	CHM13 Draft Assembly
NM_001013357.1	504190	CHM13 Draft Assembly
NM_020535.3	57292	CHM13 Draft Assembly
NM_001018081.1	553128	CHM13 Draft Assembly
NR_003054.1	692106	CHM13 Draft Assembly
NM_176884.2	259289	CHM13 Draft Assembly
NM_001001480.2	439915	CHM13 Draft Assembly
NM_152262.2	90594	CHM13 Draft Assembly
NM_033260.3	94234	CHM13 Draft Assembly
NM_005416.2	6707	CHM13 Draft Assembly
NM_001097589.1	6707	CHM13 Draft Assembly
NM_152769.2	255057	CHM13 Draft Assembly
NM_031963.2	83901	CHM13 Draft Assembly
NM_033160.5	26149	CHM13 Draft Assembly
NM_001017921.3	400673	CHM13 Draft Assembly
NM_001136503.1	284422	CHM13 Draft Assembly
NR_024498.1	646471	CHM13 Draft Assembly
NR_024044.2	245912	CHM13 Draft Assembly
NR_028064.1	100130386	CHM13 Draft Assembly
NM_031960.2	728224	CHM13 Draft Assembly
NR_002755.3	26830	CHM13 Draft Assembly
NR_030351.1	693205	CHM13 Draft Assembly
NR_030372.1	693227	CHM13 Draft Assembly
NR_029864.1	442916	CHM13 Draft Assembly
NR_029865.1	442917	CHM13 Draft Assembly
NR_029866.1	442918	CHM13 Draft Assembly
NR_031689.1	100302186	CHM13 Draft Assembly
NM_201286.3	158880	CHM13 Draft Assembly
NM_001053.3	6755	CHM13 Draft Assembly
NM_001172560.1	6755	CHM13 Draft Assembly
NM_001130026.2	285966	CHM13 Draft Assembly
NR_036138.1	100423012	CHM13 Draft Assembly
NR_036148.1	100422835	CHM13 Draft Assembly
NR_036233.1	100422952	CHM13 Draft Assembly
NR_036238.1	100422826	CHM13 Draft Assembly
NR_036261.1	100422845	CHM13 Draft Assembly
NR_036050.1	100302160	CHM13 Draft Assembly
NR_036461.1	337873	CHM13 Draft Assembly
NR_036753.1	401983	CHM13 Draft Assembly
NR_037469.1	100500906	CHM13 Draft Assembly
NR_037491.1	100500885	CHM13 Draft Assembly
NR_037512.1	100500845	CHM13 Draft Assembly
NM_001129895.2	100128124	CHM13 Draft Assembly
NR_039778.1	100616479	CHM13 Draft Assembly
NR_039836.1	100616437	CHM13 Draft Assembly
NR_039909.1	100616185	CHM13 Draft Assembly
NR_039670.1	100616389	CHM13 Draft Assembly
NM_001014980.2	388581	CHM13 Draft Assembly
NR_002728.3	10984	CHM13 Draft Assembly
NR_049859.1	100847001	CHM13 Draft Assembly
NR_049860.1	100847058	CHM13 Draft Assembly
NR_047021.1	100874168	CHM13 Draft Assembly
NR_073432.1	100130935	CHM13 Draft Assembly
NM_001009931.2	388697	CHM13 Draft Assembly
NM_001277331.1	100507608	CHM13 Draft Assembly
NM_001013356.2	504189	CHM13 Draft Assembly
NR_104073.1	101954264	CHM13 Draft Assembly
NR_106951.1	102465537	CHM13 Draft Assembly
NR_106781.1	102465432	CHM13 Draft Assembly
NR_106735.1	102464835	CHM13 Draft Assembly
NR_106862.1	102465482	CHM13 Draft Assembly
NR_107052.1	102465879	CHM13 Draft Assembly
NR_046740.1	100874118	CHM13 Draft Assembly
NR_110549.1	653691	CHM13 Draft Assembly
NM_006865.4	11026	CHM13 Draft Assembly
NM_001172654.2	11026	CHM13 Draft Assembly
NR_110999.1	653123	CHM13 Draft Assembly
NR_026803.2	401507	CHM13 Draft Assembly
NM_001166386.3	4111	CHM13 Draft Assembly
NM_005367.6	4111	CHM13 Draft Assembly
NM_001166387.3	4111	CHM13 Draft Assembly
NR_003528.3	401509	CHM13 Draft Assembly
NR_024584.2	728855	CHM13 Draft Assembly
NR_024511.2	728855	CHM13 Draft Assembly
NR_024510.2	728855	CHM13 Draft Assembly
NR_109754.2	728855	CHM13 Draft Assembly
NR_120606.1	103344926	CHM13 Draft Assembly
NM_153478.2	158511	CHM13 Draft Assembly
NM_001102576.2	158511	CHM13 Draft Assembly
NR_125392.1	101954268	CHM13 Draft Assembly
NR_036245.2	100422858	CHM13 Draft Assembly
NR_031600.2	100302196	CHM13 Draft Assembly

## Sheet: split_aligns
#Transcript accession	GeneID	Assembly	Scaffold accession	Start	End	Strand	% identity	% coverage
NM_002929.2	6011	GRCh38	NT_024498.13	53	12644	+	99.7	48
NM_002929.2	6011	GRCh38	NT_027140.7	1823838	1828218	+	99.72	52.19
NM_001733.4	715	GRCh38	NT_009714.18	1210	7797	-	99.92	52.77
NM_001733.4	715	GRCh38	NT_009759.17	7070209	7072108	-	100	46.8
NM_022892.1	4671	GRCh38	NT_034772.7	19492953	19513639	+	99.71	18.18
NM_022892.1	4671	GRCh38	NT_034772.7	20858676	20915307	-	100	100
NM_004536.2	4671	GRCh38	NT_034772.7	19492953	19513639	+	99.26	16.62
NM_004536.2	4671	GRCh38	NT_034772.7	20858676	20915307	-	100	100
NM_001122636.1	50614	GRCh38	NT_029419.13	94961120	94968438	-	100	55.2
NM_001122636.1	50614	GRCh38	NT_024477.15	14315	104957	-	98.58	47.31
NM_001143962.1	388743	GRCh38	NT_167186.2	218	56799	-	100	66.87
NM_001143962.1	388743	GRCh38	NT_004487.20	80357022	80373580	-	99.87	33.12
NM_001285449.1	23042	GRCh38	NT_010393.17	14906647	14907136	-	98.77	23.25
NM_001285449.1	23042	GRCh38	NT_010393.17	14964963	15129349	+	100	100
NM_001077693.3	641700	GRCh38	NT_034772.7	89338747	89339367	-	100	43.58
NM_001077693.3	641700	GRCh38	NT_029289.12	943	9084	-	100	55.66
NM_001293739.1	641700	GRCh38	NT_034772.7	89338747	89339367	-	100	34.92
NM_001293739.1	641700	GRCh38	NT_029289.12	943	9084	-	100	64.07
NR_121659.1	641700	GRCh38	NT_034772.7	89338747	89339367	-	100	31.15
NR_121659.1	641700	GRCh38	NT_029289.12	943	9084	-	100	67.9
NM_002929.2	6011	CHM1_1.1	NW_004929390.1	1817923	1822255	+	99.9	52.09
NM_002929.2	6011	CHM1_1.1	NW_004929391.1	51	12015	+	99.7	48
NM_001733.4	715	CHM1_1.1	NW_004929382.1	7126493	7128392	-	100	46.8
NM_001733.4	715	CHM1_1.1	NW_004929383.1	1329	5167	-	99.9	43.46
NM_001122636.1	50614	CHM1_1.1	NW_004929386.1	9952333	9959663	-	99.93	55.2
NM_001122636.1	50614	CHM1_1.1	NW_004929387.1	10992	96950	-	99.91	44.62
NM_001129778.1	400581	CHM1_1.1	NW_004929405.1	18599910	18600429	-	99.03	53.46
NM_001129778.1	400581	CHM1_1.1	NW_004929405.1	18634292	18639610	+	99.69	34.33
NM_005434.4	7851	CHM1_1.1	NW_004929304.1	785875	793758	+	99.63	71.14
NM_005434.4	7851	CHM1_1.1	NW_004929304.1	584091	622900	-	98.2	35.98
NM_001145026.1	374462	CHM1_1.1	NW_004929384.1	42982908	43218698	+	99.81	94.21
NM_001145026.1	374462	CHM1_1.1	NW_004929384.1	42994069	43025155	-	98.39	6.93
NM_001113239.2	28996	CHM1_1.1	NW_004929332.1	77811570	77907640	-	99.7	91.41
NM_001113239.2	28996	CHM1_1.1	NW_004929333.1	11353	73225	-	100	8.46
NM_022740.4	28996	CHM1_1.1	NW_004929332.1	77811570	77907640	-	99.7	91.46
NM_022740.4	28996	CHM1_1.1	NW_004929333.1	11353	73225	-	100	8.42
NM_173471.3	115286	CHM1_1.1	NW_004929310.1	877	159093	+	99.65	86.6
NM_173471.3	115286	CHM1_1.1	NW_004929309.1	66060541	66060917	+	99.73	14.03
NM_001144064.2	100129239	CHM1_1.1	NW_004929447.1	2322597	2338899	-	97.03	53.88
NM_001144064.2	100129239	CHM1_1.1	NW_004929447.1	2334344	2334579	+	100	53.88
NM_001244892.1	100133053	CHM1_1.1	NW_004929447.1	2322597	2338899	-	97.03	53.88
NM_001244892.1	100133053	CHM1_1.1	NW_004929447.1	2334344	2334579	+	100	53.88
NM_004522.2	3800	CHM1_1.1	NW_004929305.1	3212	92690	+	99.93	90.11
NM_004522.2	3800	CHM1_1.1	NW_004929304.1	39383106	39437235	+	100	9.87
NM_001288814.1	727957	CHM1_1.1	NW_004929341.1	14228	45135	+	95.09	6.17
NM_001288814.1	727957	CHM1_1.1	NW_004929340.1	58480238	58578396	+	98.77	37.46
NM_001017915.2	3635	CHM1_1.1	NW_004929306.1	1054	63141	+	99.82	76.27
NM_001017915.2	3635	CHM1_1.1	NW_004929305.1	84133995	84204534	+	99.91	22.23
NM_005541.4	3635	CHM1_1.1	NW_004929306.1	1054	63141	+	99.82	76.31
NM_005541.4	3635	CHM1_1.1	NW_004929305.1	84133995	84204534	+	99.91	22.18
NM_014938.5	22877	CHM1_1.1	NW_004929386.1	31172	51273	+	99.91	93.72
NM_014938.5	22877	CHM1_1.1	NW_004929385.1	13093799	13094337	+	100	6.38
NM_130797.3	1804	CHM1_1.1	NW_004929334.1	58900	313516	+	99.55	78.59
NM_130797.3	1804	CHM1_1.1	NW_004929333.1	14419287	14933785	+	99.51	21.32
NM_001936.4	1804	CHM1_1.1	NW_004929334.1	58900	313516	+	99.55	83.92
NM_001936.4	1804	CHM1_1.1	NW_004929333.1	14672052	14933785	+	100	16.07
NM_001039350.2	1804	CHM1_1.1	NW_004929334.1	58900	313516	+	99.55	78.72
NM_001039350.2	1804	CHM1_1.1	NW_004929333.1	14254043	14933785	+	100	21.27
NM_001290253.1	1804	CHM1_1.1	NW_004929334.1	8723	9708	+	99.79	49
NM_001290253.1	1804	CHM1_1.1	NW_004929333.1	14419287	14933789	+	99.41	49.85
NM_001290252.1	1804	CHM1_1.1	NW_004929334.1	147536	313516	+	99.58	83.43
NM_001290252.1	1804	CHM1_1.1	NW_004929333.1	14672052	14933787	+	99.86	16.61
NM_001099289.2	344558	CHM1_1.1	NW_004929304.1	1249	10853	+	99.31	57.24
NM_001099289.2	344558	CHM1_1.1	NW_004929303.1	14419793	14781116	+	100	44.22
NM_001271893.3	117581	CHM1_1.1	NW_004929306.1	5703500	5704223	+	98.62	50.95
NM_001271893.3	117581	CHM1_1.1	NW_004929307.1	1	264	+	99.62	18.73
NM_001291815.1	256158	CHM1_1.1	NW_004929367.1	366	86761	+	99.87	74.5
NM_001291815.1	256158	CHM1_1.1	NW_004929366.1	62195050	62239032	+	99.57	14.99
NM_006060.5	10320	CHM1_1.1	NW_004929330.1	33604	62172	+	100	93.2
NM_006060.5	10320	CHM1_1.1	NW_004929329.1	50336556	50359647	+	99.08	6.83
NM_001220765.2	10320	CHM1_1.1	NW_004929330.1	33604	62172	+	100	93.06
NM_001220765.2	10320	CHM1_1.1	NW_004929329.1	50336556	50359643	+	99.76	6.91
NM_001291837.1	10320	CHM1_1.1	NW_004929330.1	33604	62172	+	100	93.47
NM_001291837.1	10320	CHM1_1.1	NW_004929329.1	50340567	50359643	+	100	6.5
NM_001291838.1	10320	CHM1_1.1	NW_004929330.1	39611	62172	+	100	93.33
NM_001291838.1	10320	CHM1_1.1	NW_004929329.1	50340567	50359648	+	99.5	6.7
NM_001291845.1	10320	CHM1_1.1	NW_004929329.1	50336556	50359646	+	99.53	22.73
NM_001291845.1	10320	CHM1_1.1	NW_004929330.1	25066	26504	+	99.72	77.07
NM_001291846.1	10320	CHM1_1.1	NW_004929329.1	50336556	50359646	+	99.53	53.47
NM_001291846.1	10320	CHM1_1.1	NW_004929330.1	25066	26899	+	100	46.89
NM_001291847.1	10320	CHM1_1.1	NW_004929329.1	50340567	50359646	+	99.75	51.86
NM_001291847.1	10320	CHM1_1.1	NW_004929330.1	25066	26899	+	100	48.52
NM_001077693.3	641700	CHM1_1.1	NW_004929323.1	47098105	47098725	-	100	43.58
NM_001077693.3	641700	CHM1_1.1	NW_004929324.1	54	5238	-	100	27.68
NM_001293739.1	641700	CHM1_1.1	NW_004929323.1	47098105	47098725	-	100	34.92
NM_001293739.1	641700	CHM1_1.1	NW_004929324.1	54	5238	-	100	31.87
NM_015201.4	23246	CHM1_1.1	NW_004929340.1	58579320	58581470	-	100	42.56
NM_015201.4	23246	CHM1_1.1	NW_004929341.1	65681	80496	-	99.78	18.91
NR_003670.1	654466	CHM1_1.1	NW_004929346.1	536022	541170	-	99.9	86.04
NR_003670.1	654466	CHM1_1.1	NW_004929346.1	531628	532303	+	97.34	14.29
NR_003287.2	100008589	CHM1_1.1	NW_004929444.1	31611799	31612286	+	99.79	9.62
NR_003287.2	100008589	CHM1_1.1	NW_004929290.1	61819125	61824525	-	97.49	7.75
NR_046235.1	100861532	CHM1_1.1	NW_004929422.1	1	2144	+	99.44	16.02
NR_046235.1	100861532	CHM1_1.1	NW_004929444.1	31611799	31612286	+	99.79	3.65
NR_046235.1	100861532	CHM1_1.1	NW_004929290.1	61819125	61824525	-	97.49	2.94
NR_047527.1	387628	CHM1_1.1	NW_004929346.1	538517	586027	-	97.72	74.83
NR_047527.1	387628	CHM1_1.1	NW_004929346.1	531727	532284	+	98.56	25.07
NR_003674.2	387628	CHM1_1.1	NW_004929346.1	538517	541170	-	97.55	73.52
NR_003674.2	387628	CHM1_1.1	NW_004929346.1	531727	532303	+	97.06	27.23
NR_121659.1	641700	CHM1_1.1	NW_004929323.1	47098105	47098725	-	100	31.15
NR_121659.1	641700	CHM1_1.1	NW_004929324.1	54	5238	-	100	28.47
NM_001739.1	763	CHM13 CA Conservative 2.5% Error	LBLQ01001011.1	6181437	6198297	-	100	63.74
NM_001739.1	763	CHM13 CA Conservative 2.5% Error	LBLQ01001012.1	8530	24459	-	98.82	38.92
NM_001187.1	574	CHM13 CA Conservative 2.5% Error	LBLQ01003643.1	16900	18926	-	100	61.75
NM_001187.1	574	CHM13 CA Conservative 2.5% Error	LBLQ01003438.1	18547	21625	-	97.26	47.41
NM_053285.1	83659	CHM13 CA Conservative 2.5% Error	LBLQ01002049.1	453506	472431	+	99.89	67.5
NM_053285.1	83659	CHM13 CA Conservative 2.5% Error	LBLQ01001746.1	8813	9778	+	99.77	32.13
NM_139320.1	89832	CHM13 CA Conservative 2.5% Error	LBLQ01002907.1	445288	461064	+	99.68	77.29
NM_139320.1	89832	CHM13 CA Conservative 2.5% Error	LBLQ01002912.1	195773	209091	-	100	22.6
NM_148911.1	89832	CHM13 CA Conservative 2.5% Error	LBLQ01002907.1	445288	461064	+	99.68	79.06
NM_148911.1	89832	CHM13 CA Conservative 2.5% Error	LBLQ01002912.1	168878	209091	-	98	23.22
NM_017990.3	55066	CHM13 CA Conservative 2.5% Error	LBLQ01000454.1	22100	54607	-	99.79	83.52
NM_017990.3	55066	CHM13 CA Conservative 2.5% Error	LBLQ01003693.1	2900	19554	+	98.35	19.58
NM_182484.1	85316	CHM13 CA Conservative 2.5% Error	LBLQ01001934.1	7233	44723	-	99.03	78.58
NM_182484.1	85316	CHM13 CA Conservative 2.5% Error	LBLQ01008772.1	13467	15328	+	98.72	21.35
NM_181704.1	85317	CHM13 CA Conservative 2.5% Error	LBLQ01003503.1	8481	19359	-	99.49	54.02
NM_181704.1	85317	CHM13 CA Conservative 2.5% Error	LBLQ01003447.1	7610	9471	-	99.49	21.35
NM_182481.1	85318	CHM13 CA Conservative 2.5% Error	LBLQ01001934.1	7233	44726	-	98.15	82.97
NM_182481.1	85318	CHM13 CA Conservative 2.5% Error	LBLQ01002752.1	21896	23283	+	98.21	17.55
NM_182973.1	360200	CHM13 CA Conservative 2.5% Error	LBLQ01009528.1	130	28485	-	100	64.55
NM_182973.1	360200	CHM13 CA Conservative 2.5% Error	LBLQ01002530.1	1004245	1008485	-	99.82	35.66
NM_012173.3	26260	CHM13 CA Conservative 2.5% Error	LBLQ01002463.1	14185	34086	+	99.66	74.96
NM_012173.3	26260	CHM13 CA Conservative 2.5% Error	LBLQ01002435.1	4781	33801	-	97.75	25.08
NM_183420.1	26260	CHM13 CA Conservative 2.5% Error	LBLQ01002463.1	14185	34086	+	99.66	73.41
NM_183420.1	26260	CHM13 CA Conservative 2.5% Error	LBLQ01002435.1	4781	33801	-	97.92	26.57
NM_183421.1	26260	CHM13 CA Conservative 2.5% Error	LBLQ01002463.1	14185	34086	+	99.66	73.71
NM_183421.1	26260	CHM13 CA Conservative 2.5% Error	LBLQ01002435.1	4781	33801	-	97.92	26.29
NM_016522.2	50863	CHM13 CA Conservative 2.5% Error	LBLQ01002786.1	17264	422491	-	99.87	47.32
NM_016522.2	50863	CHM13 CA Conservative 2.5% Error	LBLQ01002784.1	2751768	2753544	-	100	52.65
NM_173550.2	203238	CHM13 CA Conservative 2.5% Error	LBLQ01005300.1	22848	347480	+	99.69	74.78
NM_173550.2	203238	CHM13 CA Conservative 2.5% Error	LBLQ01000221.1	9293	79597	-	100	26.1
NM_033515.2	93663	CHM13 CA Conservative 2.5% Error	LBLQ01000668.1	4785158	4826914	-	100	74.99
NM_033515.2	93663	CHM13 CA Conservative 2.5% Error	LBLQ01000998.1	5721	91865	-	99.13	26.26
NM_015368.3	24145	CHM13 CA Conservative 2.5% Error	LBLQ01002826.1	49426	77813	-	99.85	76.2
NM_015368.3	24145	CHM13 CA Conservative 2.5% Error	LBLQ01002827.1	4666	29480	-	99.01	25.26
NM_152540.3	152579	CHM13 CA Conservative 2.5% Error	LBLQ01000477.1	320536	761695	-	99.56	64.51
NM_152540.3	152579	CHM13 CA Conservative 2.5% Error	LBLQ01000479.1	20801	34279	-	99.91	35.61
NM_006733.2	2491	CHM13 CA Conservative 2.5% Error	LBLQ01001166.1	1208506	1265701	-	97.7	77.83
NM_006733.2	2491	CHM13 CA Conservative 2.5% Error	LBLQ01001168.1	6537	9140	-	99.84	24.69
NM_018268.2	55255	CHM13 CA Conservative 2.5% Error	LBLQ01001072.1	2187817	2220388	-	99.9	82.48
NM_018268.2	55255	CHM13 CA Conservative 2.5% Error	LBLQ01001073.1	21274	24325	-	100	17.4
NM_003852.3	8805	CHM13 CA Conservative 2.5% Error	LBLQ01001455.1	675402	731823	-	100	71.99
NM_003852.3	8805	CHM13 CA Conservative 2.5% Error	LBLQ01001456.1	1866	70814	-	99.91	31.01
NM_015905.2	8805	CHM13 CA Conservative 2.5% Error	LBLQ01001455.1	675402	731823	-	100	72.7
NM_015905.2	8805	CHM13 CA Conservative 2.5% Error	LBLQ01001456.1	1866	70814	-	99.91	30.22
NM_013310.3	29798	CHM13 CA Conservative 2.5% Error	LBLQ01003656.1	63348	64134	+	99.36	64.47
NM_013310.3	29798	CHM13 CA Conservative 2.5% Error	LBLQ01009807.1	107742	136809	+	100	35.43
NM_033547.3	92105	CHM13 CA Conservative 2.5% Error	LBLQ01001255.1	6665	56548	+	100	62.11
NM_033547.3	92105	CHM13 CA Conservative 2.5% Error	LBLQ01001252.1	9644940	9700922	+	99.74	37.68
NM_001002920.1	340441	CHM13 CA Conservative 2.5% Error	LBLQ01000457.1	7662	19978	-	99.15	44.72
NM_001002920.1	340441	CHM13 CA Conservative 2.5% Error	LBLQ01002175.1	10709	32044	+	98.57	42
NM_001002920.1	340441	CHM13 CA Conservative 2.5% Error	LBLQ01002173.1	9423	12160	+	100	15.61
NM_001003811.1	56159	CHM13 CA Conservative 2.5% Error	LBLQ01002695.1	321326	629949	-	99.25	80.85
NM_001003811.1	56159	CHM13 CA Conservative 2.5% Error	LBLQ01002698.1	6649	62369	-	95.55	24.97
NM_031276.2	56159	CHM13 CA Conservative 2.5% Error	LBLQ01002695.1	321326	625988	-	99.95	79.78
NM_031276.2	56159	CHM13 CA Conservative 2.5% Error	LBLQ01002698.1	6649	62369	-	94.75	21.95
NM_002826.4	5768	CHM13 CA Conservative 2.5% Error	LBLQ01000933.1	1083153	1105868	-	99.96	86.73
NM_002826.4	5768	CHM13 CA Conservative 2.5% Error	LBLQ01000934.1	6049	17806	-	100	13.29
NM_001004128.2	5768	CHM13 CA Conservative 2.5% Error	LBLQ01000933.1	1083153	1105868	-	99.95	82.96
NM_001004128.2	5768	CHM13 CA Conservative 2.5% Error	LBLQ01000934.1	6049	17806	-	100	17.07
NM_001005365.2	340441	CHM13 CA Conservative 2.5% Error	LBLQ01000457.1	7662	19978	-	99.27	48.58
NM_001005365.2	340441	CHM13 CA Conservative 2.5% Error	LBLQ01002175.1	10709	32044	+	98.57	39.06
NM_001005365.2	340441	CHM13 CA Conservative 2.5% Error	LBLQ01002173.1	8108	12160	+	95.53	16.75
NM_020946.1	57706	CHM13 CA Conservative 2.5% Error	LBLQ01001357.1	10309039	10808584	-	100	95.04
NM_020946.1	57706	CHM13 CA Conservative 2.5% Error	LBLQ01001172.1	19617	19867	-	100	4.97
NM_024820.2	57706	CHM13 CA Conservative 2.5% Error	LBLQ01001357.1	10330985	10808584	-	100	88.27
NM_024820.2	57706	CHM13 CA Conservative 2.5% Error	LBLQ01001172.1	19617	19867	-	100	11.58
NM_001001872.2	145407	CHM13 CA Conservative 2.5% Error	LBLQ01005041.1	23717401	23795268	+	99.08	73.88
NM_001001872.2	145407	CHM13 CA Conservative 2.5% Error	LBLQ01004044.1	6436	41588	+	96.61	33.32
NM_018945.3	27115	CHM13 CA Conservative 2.5% Error	LBLQ01000350.1	24448	72697	+	99.75	91.73
NM_018945.3	27115	CHM13 CA Conservative 2.5% Error	LBLQ01001001.1	4610598	4867558	+	100	8.74
NM_001009905.1	146712	CHM13 CA Conservative 2.5% Error	LBLQ01002756.1	366693	388712	-	99.88	62.54
NM_001009905.1	146712	CHM13 CA Conservative 2.5% Error	LBLQ01002760.1	23434	67549	-	98.06	33.33
NM_003550.2	8379	CHM13 CA Conservative 2.5% Error	LBLQ01001123.1	630031	829335	-	99.91	44.52
NM_003550.2	8379	CHM13 CA Conservative 2.5% Error	LBLQ01001125.1	34232	197801	-	99.93	55.26
NM_001013836.1	8379	CHM13 CA Conservative 2.5% Error	LBLQ01001123.1	630031	829335	-	99.91	45.13
NM_001013836.1	8379	CHM13 CA Conservative 2.5% Error	LBLQ01001125.1	34232	197801	-	99.93	54.65
NM_001013837.1	8379	CHM13 CA Conservative 2.5% Error	LBLQ01001123.1	630031	829335	-	99.91	45.18
NM_001013837.1	8379	CHM13 CA Conservative 2.5% Error	LBLQ01001125.1	34232	197801	-	99.93	54.6
NM_021965.3	5239	CHM13 CA Conservative 2.5% Error	LBLQ01000427.1	1670799	1762042	-	98.81	65.45
NM_021965.3	5239	CHM13 CA Conservative 2.5% Error	LBLQ01000428.1	22907	58495	-	99.07	38.46
NM_002285.2	3899	CHM13 CA Conservative 2.5% Error	LBLQ01001094.1	93166	555203	+	99.97	96.46
NM_002285.2	3899	CHM13 CA Conservative 2.5% Error	LBLQ01000722.1	19890	58141	-	100	3.54
NM_014326.3	23604	CHM13 CA Conservative 2.5% Error	LBLQ01002050.1	24522	56853	+	99.86	82.03
NM_014326.3	23604	CHM13 CA Conservative 2.5% Error	LBLQ01000730.1	8174	83112	-	99.59	18.56
NM_005054.2	84220	CHM13 CA Conservative 2.5% Error	LBLQ01001739.1	976546	1057056	-	97.43	71.52
NM_005054.2	84220	CHM13 CA Conservative 2.5% Error	LBLQ01001307.1	1	20320	+	97.02	39.73
NM_001848.2	1291	CHM13 CA Conservative 2.5% Error	LBLQ01006824.1	708858	713582	-	99.87	55.69
NM_001848.2	1291	CHM13 CA Conservative 2.5% Error	LBLQ01002321.1	8	11400	-	99.92	32.14
NM_001031748.2	283461	CHM13 CA Conservative 2.5% Error	LBLQ01004880.1	1882809	1948821	+	99.93	56.52
NM_001031748.2	283461	CHM13 CA Conservative 2.5% Error	LBLQ01004049.1	16333	21491	+	100	43.42
NM_000632.3	3684	CHM13 CA Conservative 2.5% Error	LBLQ01002140.1	634860	670270	-	99.51	69.92
NM_000632.3	3684	CHM13 CA Conservative 2.5% Error	LBLQ01002143.1	9510	26609	-	100	27.68
NM_001039841.1	89839	CHM13 CA Conservative 2.5% Error	LBLQ01004576.1	60627	69322	-	100	73.05
NM_001039841.1	89839	CHM13 CA Conservative 2.5% Error	LBLQ01001723.1	1105	5214	-	97.99	32.91
NM_173683.3	286046	CHM13 CA Conservative 2.5% Error	LBLQ01000239.1	2436273	2464965	-	99.83	79.12
NM_173683.3	286046	CHM13 CA Conservative 2.5% Error	LBLQ01003470.1	2421	279164	-	100	26.34
NM_170606.2	58508	CHM13 CA Conservative 2.5% Error	LBLQ01004563.1	1837524	1926714	-	99.85	79.92
NM_170606.2	58508	CHM13 CA Conservative 2.5% Error	LBLQ01010111.1	1868	27854	+	100	9.98
NM_170606.2	58508	CHM13 CA Conservative 2.5% Error	LBLQ01001936.1	24004	150058	-	100	6.33
NM_170606.2	58508	CHM13 CA Conservative 2.5% Error	LBLQ01003689.1	1695	10577	-	95.1	2.71
NM_016950.2	50859	CHM13 CA Conservative 2.5% Error	LBLQ01000613.1	163915	185255	-	99.71	71.26
NM_016950.2	50859	CHM13 CA Conservative 2.5% Error	LBLQ01000617.1	3695	469768	-	96.84	33.69
NM_001040159.1	50859	CHM13 CA Conservative 2.5% Error	LBLQ01000613.1	163915	185255	-	99.71	71.47
NM_001040159.1	50859	CHM13 CA Conservative 2.5% Error	LBLQ01000617.1	3695	469768	-	96.81	33.48
NM_173812.4	283417	CHM13 CA Conservative 2.5% Error	LBLQ01000248.1	5088308	5153534	-	99.76	73.42
NM_173812.4	283417	CHM13 CA Conservative 2.5% Error	LBLQ01000994.1	5319	49662	-	93.14	31.74
NM_144563.2	22934	CHM13 CA Conservative 2.5% Error	LBLQ01002544.1	26879	45492	+	99.78	76.33
NM_144563.2	22934	CHM13 CA Conservative 2.5% Error	LBLQ01002543.1	711888	718774	+	100	21.1
NM_032558.2	84641	CHM13 CA Conservative 2.5% Error	LBLQ01002896.1	39509	85266	+	99.55	88.38
NM_032558.2	84641	CHM13 CA Conservative 2.5% Error	LBLQ01002154.1	31729	32105	+	100	11.38
NM_001854.3	1301	CHM13 CA Conservative 2.5% Error	LBLQ01010121.1	16823	171617	+	99.93	86.73
NM_001854.3	1301	CHM13 CA Conservative 2.5% Error	LBLQ01001277.1	25185	59050	-	100	13.3
NM_080629.2	1301	CHM13 CA Conservative 2.5% Error	LBLQ01010121.1	16823	171617	+	99.93	86.8
NM_080629.2	1301	CHM13 CA Conservative 2.5% Error	LBLQ01001277.1	25185	59050	-	100	13.23
NM_006080.2	10371	CHM13 CA Conservative 2.5% Error	LBLQ01000797.1	727	102936	+	99.87	86.55
NM_006080.2	10371	CHM13 CA Conservative 2.5% Error	LBLQ01005963.1	5947930	6086430	+	98.65	14.4
NM_001042367.1	283677	CHM13 CA Conservative 2.5% Error	LBLQ01000737.1	417740	437269	-	99.54	70.51
NM_001042367.1	283677	CHM13 CA Conservative 2.5% Error	LBLQ01000738.1	35530	66295	-	99.3	30.49
NM_021016.3	5671	CHM13 CA Conservative 2.5% Error	LBLQ01000110.1	4331	15751	+	100	70.54
NM_021016.3	5671	CHM13 CA Conservative 2.5% Error	LBLQ01003766.1	68005	69808	+	99.3	29.76
NM_014812.2	9859	CHM13 CA Conservative 2.5% Error	LBLQ01000892.1	1	76228	-	98.68	74.56
NM_014812.2	9859	CHM13 CA Conservative 2.5% Error	LBLQ01000894.1	2885	59209	-	99.71	14.4
NM_014812.2	9859	CHM13 CA Conservative 2.5% Error	LBLQ01001504.1	17120	17987	-	98.28	12.07
NM_001042404.1	9859	CHM13 CA Conservative 2.5% Error	LBLQ01000892.1	1	76228	-	98.61	73.48
NM_001042404.1	9859	CHM13 CA Conservative 2.5% Error	LBLQ01000894.1	2885	59209	-	99.71	15.02
NM_001042404.1	9859	CHM13 CA Conservative 2.5% Error	LBLQ01001504.1	17120	17987	-	98.28	12.58
NM_001042405.1	9859	CHM13 CA Conservative 2.5% Error	LBLQ01000892.1	1	76228	-	98.69	73.18
NM_001042405.1	9859	CHM13 CA Conservative 2.5% Error	LBLQ01000894.1	2885	59209	-	99.71	15.19
NM_001042405.1	9859	CHM13 CA Conservative 2.5% Error	LBLQ01001504.1	17120	17987	-	98.28	12.73
NM_004514.3	3607	CHM13 CA Conservative 2.5% Error	LBLQ01002756.1	378	26228	+	99.64	75.69
NM_004514.3	3607	CHM13 CA Conservative 2.5% Error	LBLQ01005969.1	3420	69639	-	99.94	33.2
NM_153717.2	2121	CHM13 CA Conservative 2.5% Error	LBLQ01002819.1	3130293	3161062	-	99.87	73.12
NM_153717.2	2121	CHM13 CA Conservative 2.5% Error	LBLQ01008874.1	1499005	1544180	+	99.71	27.18
NM_003369.3	7405	CHM13 CA Conservative 2.5% Error	LBLQ01001255.1	1794611	1955443	-	99.97	81.8
NM_003369.3	7405	CHM13 CA Conservative 2.5% Error	LBLQ01001256.1	12000	158405	-	100	18.19
NM_000540.2	6261	CHM13 CA Conservative 2.5% Error	LBLQ01008613.1	3111	119192	+	99.52	75.33
NM_000540.2	6261	CHM13 CA Conservative 2.5% Error	LBLQ01002883.1	721	34860	-	99.85	22.81
NM_001042723.1	6261	CHM13 CA Conservative 2.5% Error	LBLQ01008613.1	3111	119192	+	99.52	75.31
NM_001042723.1	6261	CHM13 CA Conservative 2.5% Error	LBLQ01002883.1	721	34860	-	99.85	22.84
NM_032119.3	84059	CHM13 CA Conservative 2.5% Error	LBLQ01000257.1	5902	276155	-	99.98	86.42
NM_032119.3	84059	CHM13 CA Conservative 2.5% Error	LBLQ01001047.1	991	341820	+	99.9	15.75
NM_001048209.1	50863	CHM13 CA Conservative 2.5% Error	LBLQ01002786.1	17264	964190	-	99.84	41.56
NM_001048209.1	50863	CHM13 CA Conservative 2.5% Error	LBLQ01002784.1	2751768	2753544	-	100	58.41
NM_052997.2	91074	CHM13 CA Conservative 2.5% Error	LBLQ01000838.1	3429	55334	-	99.87	55.43
NM_052997.2	91074	CHM13 CA Conservative 2.5% Error	LBLQ01001395.1	181	56551	+	99.83	56.14
NM_022773.2	64788	CHM13 CA Conservative 2.5% Error	LBLQ01003196.1	94527	115533	-	99.76	65.46
NM_022773.2	64788	CHM13 CA Conservative 2.5% Error	LBLQ01003197.1	1	100691	-	98.94	42.97
NM_002742.2	5587	CHM13 CA Conservative 2.5% Error	LBLQ01000032.1	58708	207904	+	99.96	87.95
NM_002742.2	5587	CHM13 CA Conservative 2.5% Error	LBLQ01001643.1	149988	150434	-	99.77	12.15
NM_033655.3	79937	CHM13 CA Conservative 2.5% Error	LBLQ01001682.1	211	60811	+	98.75	59.45
NM_033655.3	79937	CHM13 CA Conservative 2.5% Error	LBLQ01001680.1	21095	81502	+	98.65	32.62
NM_033655.3	79937	CHM13 CA Conservative 2.5% Error	LBLQ01003229.1	5571	26969	+	99.08	8.37
NM_005224.2	1820	CHM13 CA Conservative 2.5% Error	LBLQ01002587.1	187449	200179	-	99.72	65.28
NM_005224.2	1820	CHM13 CA Conservative 2.5% Error	LBLQ01008903.1	18565	25277	-	99.59	34.89
NM_001079673.1	22862	CHM13 CA Conservative 2.5% Error	LBLQ01002796.1	3017157	3059694	-	100	79.6
NM_001079673.1	22862	CHM13 CA Conservative 2.5% Error	LBLQ01000033.1	12579	182614	-	100	20.33
NM_022892.1	4671	CHM13 CA Conservative 2.5% Error	LBLQ01002228.1	4055	23529	+	99.15	81.63
NM_022892.1	4671	CHM13 CA Conservative 2.5% Error	LBLQ01002229.1	6817850	6844171	+	99.25	18.11
NM_004536.2	4671	CHM13 CA Conservative 2.5% Error	LBLQ01002228.1	4055	23529	+	99.15	73.27
NM_004536.2	4671	CHM13 CA Conservative 2.5% Error	LBLQ01002229.1	6817850	6844171	+	99.48	26.49
NM_001079802.1	2218	CHM13 CA Conservative 2.5% Error	LBLQ01000283.1	148700	193230	-	99.97	95.72
NM_001079802.1	2218	CHM13 CA Conservative 2.5% Error	LBLQ01000284.1	3	38498	-	99.73	5.1
NM_006731.2	2218	CHM13 CA Conservative 2.5% Error	LBLQ01000283.1	148700	193230	-	99.97	96.91
NM_006731.2	2218	CHM13 CA Conservative 2.5% Error	LBLQ01000284.1	3	38498	-	100	3.92
NM_177531.4	93035	CHM13 CA Conservative 2.5% Error	LBLQ01000449.1	9931095	10081031	-	99.99	98.1
NM_177531.4	93035	CHM13 CA Conservative 2.5% Error	LBLQ01000451.1	1402	8033	-	95.05	2.41
NM_018491.3	55871	CHM13 CA Conservative 2.5% Error	LBLQ01002765.1	919	43985	-	99.15	68.83
NM_018491.3	55871	CHM13 CA Conservative 2.5% Error	LBLQ01002552.1	3214	18652	-	99.16	34.42
NM_198455.2	23145	CHM13 CA Conservative 2.5% Error	LBLQ01006265.1	1076468	1121982	+	99.81	81.54
NM_198455.2	23145	CHM13 CA Conservative 2.5% Error	LBLQ01006837.1	23	7915	+	99.92	8.58
NM_001083538.1	445582	CHM13 CA Conservative 2.5% Error	LBLQ01003358.1	68424	101070	+	94.73	88.4
NM_001083538.1	445582	CHM13 CA Conservative 2.5% Error	LBLQ01004119.1	5091	13737	-	91.12	12
NM_001083536.1	89846	CHM13 CA Conservative 2.5% Error	LBLQ01002624.1	8883	69883	+	99.9	88.09
NM_001083536.1	89846	CHM13 CA Conservative 2.5% Error	LBLQ01002623.1	43164	55472	+	96.22	14.4
NM_017757.2	55628	CHM13 CA Conservative 2.5% Error	LBLQ01007238.1	114728	124887	-	99.91	60.68
NM_017757.2	55628	CHM13 CA Conservative 2.5% Error	LBLQ01003165.1	14535	306270	+	99.59	39.84
NM_001039590.2	8239	CHM13 CA Conservative 2.5% Error	LBLQ01000746.1	1910460	2049987	+	99.77	62.22
NM_001039590.2	8239	CHM13 CA Conservative 2.5% Error	LBLQ01000748.1	1258	8267	+	98.33	37.65
NM_001039591.2	8239	CHM13 CA Conservative 2.5% Error	LBLQ01000746.1	1910460	2049987	+	99.77	62.47
NM_001039591.2	8239	CHM13 CA Conservative 2.5% Error	LBLQ01000748.1	1258	8267	+	98.42	37.44
NM_001085457.1	644019	CHM13 CA Conservative 2.5% Error	LBLQ01002765.1	923	43985	-	99.32	68.76
NM_001085457.1	644019	CHM13 CA Conservative 2.5% Error	LBLQ01002552.1	1645	18652	-	98.58	36.88
NM_001097612.1	653519	CHM13 CA Conservative 2.5% Error	LBLQ01000678.1	570	23853	+	99.79	49.84
NM_001097612.1	653519	CHM13 CA Conservative 2.5% Error	LBLQ01000677.1	2715	25757	+	99.71	35.73
NM_016334.3	51463	CHM13 CA Conservative 2.5% Error	LBLQ01002371.1	615	24273	+	99.91	54.86
NM_016334.3	51463	CHM13 CA Conservative 2.5% Error	LBLQ01000679.1	213	49800	+	99.5	47.11
NM_170678.2	27231	CHM13 CA Conservative 2.5% Error	LBLQ01002528.1	1312	1906	-	100	27.67
NM_170678.2	27231	CHM13 CA Conservative 2.5% Error	LBLQ01001573.1	944	3477	+	98.12	47.06
NM_152440.4	144577	CHM13 CA Conservative 2.5% Error	LBLQ01007240.1	7315	9336	+	100	77.76
NM_152440.4	144577	CHM13 CA Conservative 2.5% Error	LBLQ01000252.1	1006	26622	-	95.75	26.71
NM_020823.1	57583	CHM13 CA Conservative 2.5% Error	LBLQ01001236.1	9437	39652	+	100	83.06
NM_020823.1	57583	CHM13 CA Conservative 2.5% Error	LBLQ01004564.1	1762	39495	-	100	10.76
NM_020823.1	57583	CHM13 CA Conservative 2.5% Error	LBLQ01001234.1	758239	795529	+	99.26	9.96
NM_182482.2	85319	CHM13 CA Conservative 2.5% Error	LBLQ01001934.1	7233	44726	-	98.85	82.97
NM_182482.2	85319	CHM13 CA Conservative 2.5% Error	LBLQ01002752.1	21896	33510	+	98.57	18.5
NM_194318.3	145173	CHM13 CA Conservative 2.5% Error	LBLQ01009812.1	257384	305177	-	99.96	77.22
NM_194318.3	145173	CHM13 CA Conservative 2.5% Error	LBLQ01001471.1	933577	1020413	+	99.91	27.81
NM_020892.2	113878	CHM13 CA Conservative 2.5% Error	LBLQ01000301.1	22787	39579	-	99.92	48.17
NM_020892.2	113878	CHM13 CA Conservative 2.5% Error	LBLQ01000307.1	3032	24998	+	99.59	43.13
NM_020892.2	113878	CHM13 CA Conservative 2.5% Error	LBLQ01009197.1	2593	4647	-	100	12.27
NM_001102594.1	113878	CHM13 CA Conservative 2.5% Error	LBLQ01000301.1	22787	39579	-	99.92	50.31
NM_001102594.1	113878	CHM13 CA Conservative 2.5% Error	LBLQ01000307.1	13138	24998	+	99.63	40.55
NM_001102594.1	113878	CHM13 CA Conservative 2.5% Error	LBLQ01009197.1	2594	4647	-	100	12.78
NM_001102595.1	113878	CHM13 CA Conservative 2.5% Error	LBLQ01000301.1	22787	39579	-	99.92	53.59
NM_001102595.1	113878	CHM13 CA Conservative 2.5% Error	LBLQ01000307.1	9191	24998	+	98.53	45.29
NM_001102596.1	113878	CHM13 CA Conservative 2.5% Error	LBLQ01000301.1	22787	39579	-	99.91	57.35
NM_001102596.1	113878	CHM13 CA Conservative 2.5% Error	LBLQ01000307.1	13227	24996	+	99.7	47.24
NM_001103154.1	100506084	CHM13 CA Conservative 2.5% Error	LBLQ01002301.1	35208	44144	-	100	75.61
NM_001103154.1	100506084	CHM13 CA Conservative 2.5% Error	LBLQ01002736.1	59715	59835	-	100	24.79
NM_021259.2	58986	CHM13 CA Conservative 2.5% Error	LBLQ01003194.1	18	5173	-	100	20.92
NM_021259.2	58986	CHM13 CA Conservative 2.5% Error	LBLQ01003431.1	1	742	+	100	20.29
NM_006382.3	374286	CHM13 CA Conservative 2.5% Error	LBLQ01001153.1	2210	2799	+	97.45	21.31
NM_006382.3	374286	CHM13 CA Conservative 2.5% Error	LBLQ01001772.1	27904	58092	-	99.18	79.42
NM_006310.3	9520	CHM13 CA Conservative 2.5% Error	LBLQ01000494.1	12371057	12415029	-	99.33	85.89
NM_006310.3	9520	CHM13 CA Conservative 2.5% Error	LBLQ01004859.1	4829	20022	-	99.11	12.9
NM_145025.4	221264	CHM13 CA Conservative 2.5% Error	LBLQ01000849.1	1568	9333	+	99.93	61.21
NM_145025.4	221264	CHM13 CA Conservative 2.5% Error	LBLQ01001158.1	6316	56072	-	97.92	41.12
NM_015236.4	23284	CHM13 CA Conservative 2.5% Error	LBLQ01000935.1	19918	447125	+	99.72	93.58
NM_015236.4	23284	CHM13 CA Conservative 2.5% Error	LBLQ01000482.1	132337	222674	+	100	7.19
NM_018291.3	55277	CHM13 CA Conservative 2.5% Error	LBLQ01000289.1	41685	299048	-	100	54.92
NM_018291.3	55277	CHM13 CA Conservative 2.5% Error	LBLQ01000287.1	2949951	3054760	-	97.8	31.33
NM_018291.3	55277	CHM13 CA Conservative 2.5% Error	LBLQ01000288.1	20041	50614	-	99.69	15.91
NM_001113411.1	55277	CHM13 CA Conservative 2.5% Error	LBLQ01000289.1	41685	299048	-	100	53.04
NM_001113411.1	55277	CHM13 CA Conservative 2.5% Error	LBLQ01000287.1	2949951	3054760	-	97.51	30.53
NM_001113411.1	55277	CHM13 CA Conservative 2.5% Error	LBLQ01000288.1	3470	50614	-	98.32	19.79
NM_001122636.1	50614	CHM13 CA Conservative 2.5% Error	LBLQ01001272.1	551343	558692	-	99.79	55.2
NM_001122636.1	50614	CHM13 CA Conservative 2.5% Error	LBLQ01003019.1	17641	46430	-	99.86	26.97
NM_001122636.1	50614	CHM13 CA Conservative 2.5% Error	LBLQ01008659.1	19396	19750	-	100	13.24
NM_001303.3	1352	CHM13 CA Conservative 2.5% Error	LBLQ01001154.1	1332470	1349159	-	99.52	70.01
NM_001303.3	1352	CHM13 CA Conservative 2.5% Error	LBLQ01002048.1	30766	121306	-	99.66	29.8
NM_014845.5	9896	CHM13 CA Conservative 2.5% Error	LBLQ01001161.1	3165	68669	+	99.82	56.77
NM_014845.5	9896	CHM13 CA Conservative 2.5% Error	LBLQ01001158.1	56081	108631	+	99.85	43.48
NM_001128223.1	100131827	CHM13 CA Conservative 2.5% Error	LBLQ01009751.1	20270	22737	-	98.39	80.08
NM_001128223.1	100131827	CHM13 CA Conservative 2.5% Error	LBLQ01010332.1	16983	18789	-	99.48	12.58
NM_000132.3	2157	CHM13 CA Conservative 2.5% Error	LBLQ01004323.1	18328	144979	-	99.98	72.98
NM_000132.3	2157	CHM13 CA Conservative 2.5% Error	LBLQ01001734.1	261283	288729	-	99.95	26.95
NM_004080.2	1607	CHM13 CA Conservative 2.5% Error	LBLQ01000600.1	120155	153266	+	99.93	65.43
NM_004080.2	1607	CHM13 CA Conservative 2.5% Error	LBLQ01000924.1	15275704	15780716	+	99.95	34.57
NM_145695.2	1607	CHM13 CA Conservative 2.5% Error	LBLQ01000600.1	120155	122335	+	100	31.25
NM_145695.2	1607	CHM13 CA Conservative 2.5% Error	LBLQ01000924.1	15275704	15804528	+	99.25	71.96
NM_002781.3	5673	CHM13 CA Conservative 2.5% Error	LBLQ01003973.1	15207	23609	-	99.81	65.79
NM_002781.3	5673	CHM13 CA Conservative 2.5% Error	LBLQ01010174.1	17945	19743	+	99.11	33.61
NM_001130014.1	5673	CHM13 CA Conservative 2.5% Error	LBLQ01003973.1	15207	23609	-	99.8	64.31
NM_001130014.1	5673	CHM13 CA Conservative 2.5% Error	LBLQ01010174.1	17945	19743	+	99.11	35.04
NM_172362.2	3756	CHM13 CA Conservative 2.5% Error	LBLQ01002296.1	4245645	4487686	-	99.82	85.18
NM_172362.2	3756	CHM13 CA Conservative 2.5% Error	LBLQ01000330.1	27980	143208	-	99.83	14.9
NM_002238.3	3756	CHM13 CA Conservative 2.5% Error	LBLQ01002296.1	4245645	4487685	-	99.82	86.03
NM_002238.3	3756	CHM13 CA Conservative 2.5% Error	LBLQ01000330.1	28067	143208	-	100	13.98
NM_001130148.1	84318	CHM13 CA Conservative 2.5% Error	LBLQ01001548.1	6573	20384	+	99.77	78.05
NM_001130148.1	84318	CHM13 CA Conservative 2.5% Error	LBLQ01001547.1	19379	48602	+	97.75	22.99
NM_032358.3	84318	CHM13 CA Conservative 2.5% Error	LBLQ01001548.1	6573	20384	+	99.77	75.39
NM_032358.3	84318	CHM13 CA Conservative 2.5% Error	LBLQ01001547.1	31637	48602	+	98.05	25.6
NM_001130146.1	84318	CHM13 CA Conservative 2.5% Error	LBLQ01001548.1	6573	20384	+	99.77	77.14
NM_001130146.1	84318	CHM13 CA Conservative 2.5% Error	LBLQ01001547.1	31637	48602	+	97.86	23.88
NM_001130147.1	84318	CHM13 CA Conservative 2.5% Error	LBLQ01001548.1	6573	20384	+	99.77	76.25
NM_001130147.1	84318	CHM13 CA Conservative 2.5% Error	LBLQ01001547.1	19379	48602	+	97.96	24.75
NM_004061.3	1010	CHM13 CA Conservative 2.5% Error	LBLQ01000502.1	194281	307538	-	98.79	64.18
NM_004061.3	1010	CHM13 CA Conservative 2.5% Error	LBLQ01000511.1	7394	648610	-	100	20.75
NM_004061.3	1010	CHM13 CA Conservative 2.5% Error	LBLQ01000507.1	52222	69885	-	96.88	10.93
NM_004061.3	1010	CHM13 CA Conservative 2.5% Error	LBLQ01001361.1	843	18618	+	95.46	8.53
NM_152653.3	7325	CHM13 CA Conservative 2.5% Error	LBLQ01000563.1	152032	243261	+	100	76.98
NM_152653.3	7325	CHM13 CA Conservative 2.5% Error	LBLQ01000561.1	462986	511328	+	97.11	27.5
NM_017952.5	55037	CHM13 CA Conservative 2.5% Error	LBLQ01006538.1	585181	603640	-	99.73	89.32
NM_017952.5	55037	CHM13 CA Conservative 2.5% Error	LBLQ01001318.1	2075	14948	-	99.18	9.09
NM_022780.3	64795	CHM13 CA Conservative 2.5% Error	LBLQ01006266.1	11805	48840	+	99.87	91.58
NM_022780.3	64795	CHM13 CA Conservative 2.5% Error	LBLQ01000717.1	50295	71076	-	98.94	10.67
NM_052885.3	114134	CHM13 CA Conservative 2.5% Error	LBLQ01004049.1	54604	250982	-	99.86	86.09
NM_052885.3	114134	CHM13 CA Conservative 2.5% Error	LBLQ01000644.1	49008	126566	-	100	13.9
NM_145301.2	201158	CHM13 CA Conservative 2.5% Error	LBLQ01001154.1	39431	40396	+	99.48	59.78
NM_145301.2	201158	CHM13 CA Conservative 2.5% Error	LBLQ01001152.1	3083	20921	+	99.84	39.46
NM_173519.2	157807	CHM13 CA Conservative 2.5% Error	LBLQ01002336.1	30358	32546	+	99.77	62.68
NM_173519.2	157807	CHM13 CA Conservative 2.5% Error	LBLQ01002335.1	4093970	4271556	+	98.69	39.07
NM_001135865.1	100132247	CHM13 CA Conservative 2.5% Error	LBLQ01001389.1	21967	34545	-	99.78	86.27
NM_001135865.1	100132247	CHM13 CA Conservative 2.5% Error	LBLQ01001310.1	315	10693	-	98.87	13.79
NM_182588.2	285190	CHM13 CA Conservative 2.5% Error	LBLQ01000718.1	2304	50760	-	98.35	73.49
NM_182588.2	285190	CHM13 CA Conservative 2.5% Error	LBLQ01001977.1	13266	33085	-	97.74	32.62
NM_001137671.1	388468	CHM13 CA Conservative 2.5% Error	LBLQ01002053.1	1396	22465	-	97.61	77.88
NM_001137671.1	388468	CHM13 CA Conservative 2.5% Error	LBLQ01003177.1	13687	13942	-	100	11.41
NM_001080825.2	144404	CHM13 CA Conservative 2.5% Error	LBLQ01008579.1	9090	29533	+	99.86	92.09
NM_001080825.2	144404	CHM13 CA Conservative 2.5% Error	LBLQ01008576.1	9894275	9937013	+	99.17	8.04
NM_018723.3	54715	CHM13 CA Conservative 2.5% Error	LBLQ01008876.1	91262	754016	+	99.81	79.64
NM_018723.3	54715	CHM13 CA Conservative 2.5% Error	LBLQ01005138.1	755112	1398489	+	99.1	21
NM_001142333.1	54715	CHM13 CA Conservative 2.5% Error	LBLQ01008876.1	91262	754016	+	99.81	79.29
NM_001142333.1	54715	CHM13 CA Conservative 2.5% Error	LBLQ01005138.1	755112	1398489	+	99.1	21.36
NM_015092.4	23049	CHM13 CA Conservative 2.5% Error	LBLQ01002582.1	48356	120016	-	99.9	90.75
NM_015092.4	23049	CHM13 CA Conservative 2.5% Error	LBLQ01002144.1	7731	22526	+	97.09	7.46
NM_015092.4	23049	CHM13 CA Conservative 2.5% Error	LBLQ01002486.1	2449639	2450096	+	99.34	2.83
NM_001144013.1	653489	CHM13 CA Conservative 2.5% Error	LBLQ01000718.1	1477	50760	-	98.46	89.59
NM_001144013.1	653489	CHM13 CA Conservative 2.5% Error	LBLQ01003142.1	30806	31364	-	98.56	9.51
NM_001144770.1	667	CHM13 CA Conservative 2.5% Error	LBLQ01001244.1	47249	324565	+	99.98	98.11
NM_001144770.1	667	CHM13 CA Conservative 2.5% Error	LBLQ01001243.1	505977	520486	+	97.2	2.2
NM_005708.3	10082	CHM13 CA Conservative 2.5% Error	LBLQ01000927.1	50273	912705	+	99.96	88.94
NM_005708.3	10082	CHM13 CA Conservative 2.5% Error	LBLQ01005938.1	277315	278107	-	100	11.14
NM_018676.3	55901	CHM13 CA Conservative 2.5% Error	LBLQ01001509.1	1	28837	-	100	84.87
NM_018676.3	55901	CHM13 CA Conservative 2.5% Error	LBLQ01002796.1	65022	65624	+	97.02	17.99
NM_199263.2	55901	CHM13 CA Conservative 2.5% Error	LBLQ01001509.1	1	28837	-	100	84.12
NM_199263.2	55901	CHM13 CA Conservative 2.5% Error	LBLQ01002796.1	65022	65624	+	97.02	18.89
NM_003156.3	6786	CHM13 CA Conservative 2.5% Error	LBLQ01000218.1	15774	85104	+	99.96	79.29
NM_003156.3	6786	CHM13 CA Conservative 2.5% Error	LBLQ01008445.1	43439	44145	-	100	17.4
NM_001144058.1	50863	CHM13 CA Conservative 2.5% Error	LBLQ01002786.1	1780	422491	-	99.87	47.91
NM_001144058.1	50863	CHM13 CA Conservative 2.5% Error	LBLQ01002784.1	2751768	2758446	-	99.83	53.37
NM_015226.2	23274	CHM13 CA Conservative 2.5% Error	LBLQ01001390.1	1359578	1476428	+	100	34.04
NM_015226.2	23274	CHM13 CA Conservative 2.5% Error	LBLQ01002113.1	39065	54869	+	100	58.38
NM_178563.3	340351	CHM13 CA Conservative 2.5% Error	LBLQ01001457.1	8860	81627	-	99.12	61.09
NM_178563.3	340351	CHM13 CA Conservative 2.5% Error	LBLQ01001456.1	3397333	3473992	-	99.86	40.87
NM_001145029.1	374860	CHM13 CA Conservative 2.5% Error	LBLQ01003304.1	5396	99911	-	99.96	65.06
NM_001145029.1	374860	CHM13 CA Conservative 2.5% Error	LBLQ01003341.1	3067	27514	+	98.19	44.14
NM_001145065.1	401145	CHM13 CA Conservative 2.5% Error	LBLQ01001178.1	4797691	6086657	-	99.94	95.21
NM_001145065.1	401145	CHM13 CA Conservative 2.5% Error	LBLQ01001179.1	91844	110920	-	93.7	6.59
NM_153267.4	256691	CHM13 CA Conservative 2.5% Error	LBLQ01000427.1	37992	165030	-	99.95	62.71
NM_153267.4	256691	CHM13 CA Conservative 2.5% Error	LBLQ01003127.1	8868115	8876795	-	99.92	37.36
NM_001145268.1	222234	CHM13 CA Conservative 2.5% Error	LBLQ01000992.1	432	21288	+	98.79	44.02
NM_001145268.1	222234	CHM13 CA Conservative 2.5% Error	LBLQ01000989.1	36360	45357	+	100	39.67
NM_001145268.1	222234	CHM13 CA Conservative 2.5% Error	LBLQ01001505.1	1635	16692	+	99.63	11.97
NM_001145269.1	222234	CHM13 CA Conservative 2.5% Error	LBLQ01000992.1	20353	21288	+	100	49.08
NM_001145269.1	222234	CHM13 CA Conservative 2.5% Error	LBLQ01000989.1	36360	45357	+	100	28.79
NM_001145269.1	222234	CHM13 CA Conservative 2.5% Error	LBLQ01001505.1	1635	16692	+	99.63	14.13
NM_001145355.1	55871	CHM13 CA Conservative 2.5% Error	LBLQ01002765.1	919	43988	-	99.07	65.29
NM_001145355.1	55871	CHM13 CA Conservative 2.5% Error	LBLQ01002552.1	3214	18652	-	99.28	37.92
NM_001145356.1	55871	CHM13 CA Conservative 2.5% Error	LBLQ01002765.1	919	43985	-	99.11	67.76
NM_001145356.1	55871	CHM13 CA Conservative 2.5% Error	LBLQ01002552.1	3214	18652	-	99.16	35.59
NM_001145418.1	23331	CHM13 CA Conservative 2.5% Error	LBLQ01002914.1	13790	199372	+	99.86	90.85
NM_001145418.1	23331	CHM13 CA Conservative 2.5% Error	LBLQ01002913.1	3360	418107	+	99.03	9.59
NM_001145442.1	641455	CHM13 CA Conservative 2.5% Error	LBLQ01003359.1	2989	21321	+	99.87	82.37
NM_001145442.1	641455	CHM13 CA Conservative 2.5% Error	LBLQ01008628.1	8238	20943	+	95.53	17.8
NM_001142800.1	346007	CHM13 CA Conservative 2.5% Error	LBLQ01001067.1	2286816	3869448	-	99.96	78.26
NM_001142800.1	346007	CHM13 CA Conservative 2.5% Error	LBLQ01001069.1	24721	394682	-	100	21.75
NM_001145808.1	3684	CHM13 CA Conservative 2.5% Error	LBLQ01002140.1	634860	670270	-	99.51	69.94
NM_001145808.1	3684	CHM13 CA Conservative 2.5% Error	LBLQ01002143.1	9510	26609	-	100	27.67
NM_001008537.2	340533	CHM13 CA Conservative 2.5% Error	LBLQ01001889.1	141687	154538	+	99.99	95.15
NM_001008537.2	340533	CHM13 CA Conservative 2.5% Error	LBLQ01006988.1	23276	46375	-	97.19	5.76
NM_001105521.2	282973	CHM13 CA Conservative 2.5% Error	LBLQ01000827.1	2377384	2443485	+	99.45	61.92
NM_001105521.2	282973	CHM13 CA Conservative 2.5% Error	LBLQ01008640.1	208568	218627	-	99.36	38.51
NM_001143831.2	2915	CHM13 CA Conservative 2.5% Error	LBLQ01000751.1	860083	1205761	-	99.94	89.12
NM_001143831.2	2915	CHM13 CA Conservative 2.5% Error	LBLQ01008406.1	55013	263146	-	98.01	14.14
NM_001146189.1	55628	CHM13 CA Conservative 2.5% Error	LBLQ01007238.1	114728	124887	-	99.91	83.06
NM_001146189.1	55628	CHM13 CA Conservative 2.5% Error	LBLQ01003165.1	14535	161595	+	99.03	17.67
NM_001146190.1	55628	CHM13 CA Conservative 2.5% Error	LBLQ01007238.1	114728	124887	-	99.91	86.4
NM_001146190.1	55628	CHM13 CA Conservative 2.5% Error	LBLQ01003165.1	14535	45159	+	98.72	13.95
NM_170692.2	9462	CHM13 CA Conservative 2.5% Error	LBLQ01002309.1	85850	175247	+	99.98	88.78
NM_170692.2	9462	CHM13 CA Conservative 2.5% Error	LBLQ01001366.1	420567	610549	+	99.9	10.04
NM_018842.4	55971	CHM13 CA Conservative 2.5% Error	LBLQ01001961.1	75583	104227	-	99.81	87.02
NM_018842.4	55971	CHM13 CA Conservative 2.5% Error	LBLQ01001962.1	24429	70789	-	99.79	12.98
NM_033103.4	85415	CHM13 CA Conservative 2.5% Error	LBLQ01001301.1	545	73614	-	99.41	48.13
NM_033103.4	85415	CHM13 CA Conservative 2.5% Error	LBLQ01001299.1	3742103	3755498	-	98.99	55.87
NM_172003.3	150472	CHM13 CA Conservative 2.5% Error	LBLQ01002765.1	887	43985	-	99.17	66.66
NM_172003.3	150472	CHM13 CA Conservative 2.5% Error	LBLQ01002552.1	1603	18724	-	97.33	40.77
NM_173569.3	254048	CHM13 CA Conservative 2.5% Error	LBLQ01001454.1	4267465	4314404	-	99.75	93.63
NM_173569.3	254048	CHM13 CA Conservative 2.5% Error	LBLQ01001455.1	5287	25859	-	100	4.58
NM_001160116.1	123207	CHM13 CA Conservative 2.5% Error	LBLQ01002085.1	1222377	1249190	+	97.68	29.52
NM_001160116.1	123207	CHM13 CA Conservative 2.5% Error	LBLQ01000792.1	1476008	1476393	-	86.82	62.35
NM_001145128.2	221264	CHM13 CA Conservative 2.5% Error	LBLQ01000850.1	25471	118694	+	99.93	69.79
NM_001145128.2	221264	CHM13 CA Conservative 2.5% Error	LBLQ01000849.1	1568	30668	+	99.89	14.71
NM_001145128.2	221264	CHM13 CA Conservative 2.5% Error	LBLQ01001158.1	6339	56072	-	99.32	16.26
NM_014798.2	9842	CHM13 CA Conservative 2.5% Error	LBLQ01002026.1	5242	27805	+	99.73	72.48
NM_014798.2	9842	CHM13 CA Conservative 2.5% Error	LBLQ01002024.1	14860	37169	+	98.91	27.81
NM_007246.3	11275	CHM13 CA Conservative 2.5% Error	LBLQ01000612.1	2769	87176	+	99.88	83.71
NM_007246.3	11275	CHM13 CA Conservative 2.5% Error	LBLQ01000606.1	639403	660704	+	99.61	16.7
NM_001161521.1	11275	CHM13 CA Conservative 2.5% Error	LBLQ01000612.1	2769	87176	+	99.88	87.12
NM_001161521.1	11275	CHM13 CA Conservative 2.5% Error	LBLQ01000606.1	641804	660704	+	99.5	13.3
NM_001161522.1	11275	CHM13 CA Conservative 2.5% Error	LBLQ01000612.1	2775	87176	+	99.96	90.12
NM_001161522.1	11275	CHM13 CA Conservative 2.5% Error	LBLQ01000606.1	641804	659624	+	97.24	12.41
NM_018837.3	55959	CHM13 CA Conservative 2.5% Error	LBLQ01000907.1	8165	54220	+	99.96	80.66
NM_018837.3	55959	CHM13 CA Conservative 2.5% Error	LBLQ01000906.1	2871911	2921216	+	99.86	19.05
NM_198596.2	55959	CHM13 CA Conservative 2.5% Error	LBLQ01000907.1	8165	54220	+	99.96	74.16
NM_198596.2	55959	CHM13 CA Conservative 2.5% Error	LBLQ01000906.1	2871359	2921216	+	99.81	25.57
NM_001161841.1	55959	CHM13 CA Conservative 2.5% Error	LBLQ01000907.1	8165	54220	+	99.96	74.22
NM_001161841.1	55959	CHM13 CA Conservative 2.5% Error	LBLQ01000906.1	2871359	2921216	+	99.81	25.51
NM_175722.3	7173	CHM13 CA Conservative 2.5% Error	LBLQ01005981.1	4786	109620	-	99.38	83.64
NM_175722.3	7173	CHM13 CA Conservative 2.5% Error	LBLQ01001787.1	17913	20047	+	100	17.26
NM_175721.3	7173	CHM13 CA Conservative 2.5% Error	LBLQ01005981.1	4786	109620	-	99.48	85.8
NM_175721.3	7173	CHM13 CA Conservative 2.5% Error	LBLQ01001787.1	17913	20047	+	100	14.97
NM_175719.3	7173	CHM13 CA Conservative 2.5% Error	LBLQ01005981.1	4786	110567	-	99.45	86.04
NM_175719.3	7173	CHM13 CA Conservative 2.5% Error	LBLQ01001787.1	17913	20047	+	100	14.72
NM_000547.5	7173	CHM13 CA Conservative 2.5% Error	LBLQ01005981.1	4786	110567	-	99.48	86.8
NM_000547.5	7173	CHM13 CA Conservative 2.5% Error	LBLQ01001787.1	17913	20047	+	100	13.92
NM_181453.3	9648	CHM13 CA Conservative 2.5% Error	LBLQ01001743.1	5472	56072	-	99.94	73.53
NM_181453.3	9648	CHM13 CA Conservative 2.5% Error	LBLQ01001741.1	156758	166607	-	99.02	29.22
NM_032142.3	55125	CHM13 CA Conservative 2.5% Error	LBLQ01002795.1	6004	122600	+	100	95.36
NM_032142.3	55125	CHM13 CA Conservative 2.5% Error	LBLQ01000414.1	3988	14211	-	99.73	4.65
NM_001164315.1	375248	CHM13 CA Conservative 2.5% Error	LBLQ01003444.1	2032	70808	+	95.52	44.71
NM_001164315.1	375248	CHM13 CA Conservative 2.5% Error	LBLQ01001930.1	15667	62166	+	93.42	42.71
NM_001164315.1	375248	CHM13 CA Conservative 2.5% Error	LBLQ01010139.1	46763	78226	+	95.02	19.85
NM_025190.3	57730	CHM13 CA Conservative 2.5% Error	LBLQ01001099.1	492	37595	-	99.44	62.49
NM_025190.3	57730	CHM13 CA Conservative 2.5% Error	LBLQ01004231.1	3077	51367	+	98.71	30.85
NM_025190.3	57730	CHM13 CA Conservative 2.5% Error	LBLQ01004229.1	6139	17198	+	100	16.28
NM_001099771.2	728378	CHM13 CA Conservative 2.5% Error	LBLQ01003358.1	68383	101413	+	93.53	78.76
NM_001099771.2	728378	CHM13 CA Conservative 2.5% Error	LBLQ01004119.1	5091	13737	-	91.58	9.52
NM_001164463.1	727851	CHM13 CA Conservative 2.5% Error	LBLQ01000718.1	4051	50760	-	98.53	71.68
NM_001164463.1	727851	CHM13 CA Conservative 2.5% Error	LBLQ01001977.1	13241	33085	-	99.83	32.49
NM_031218.3	81931	CHM13 CA Conservative 2.5% Error	LBLQ01002078.1	4417532	4436545	-	100	89.08
NM_031218.3	81931	CHM13 CA Conservative 2.5% Error	LBLQ01006267.1	942037	957780	+	100	14.38
NM_001164507.1	4703	CHM13 CA Conservative 2.5% Error	LBLQ01000400.1	17	137515	-	99.9	54.57
NM_001164507.1	4703	CHM13 CA Conservative 2.5% Error	LBLQ01000397.1	4332976	4441668	-	99.9	43.91
NM_001164508.1	4703	CHM13 CA Conservative 2.5% Error	LBLQ01000400.1	17	137515	-	99.9	54.57
NM_001164508.1	4703	CHM13 CA Conservative 2.5% Error	LBLQ01000397.1	4332976	4441668	-	99.9	43.91
NM_004543.4	4703	CHM13 CA Conservative 2.5% Error	LBLQ01000400.1	12846	137515	-	99.97	57.18
NM_004543.4	4703	CHM13 CA Conservative 2.5% Error	LBLQ01000397.1	4332976	4441664	-	99.82	43.1
NM_033225.5	64478	CHM13 CA Conservative 2.5% Error	LBLQ01002943.1	483383	957942	-	99.87	86.34
NM_033225.5	64478	CHM13 CA Conservative 2.5% Error	LBLQ01002852.1	1197247	2721575	+	100	13.6
NM_001165899.1	5144	CHM13 CA Conservative 2.5% Error	LBLQ01001615.1	7709912	8729364	-	99.94	96.45
NM_001165899.1	5144	CHM13 CA Conservative 2.5% Error	LBLQ01001078.1	131109	433664	-	100	3.55
NM_001123363.3	729540	CHM13 CA Conservative 2.5% Error	LBLQ01001739.1	976546	1086537	-	97.02	73.2
NM_001123363.3	729540	CHM13 CA Conservative 2.5% Error	LBLQ01001307.1	1	20339	+	97.01	37.51
NM_001077653.2	57057	CHM13 CA Conservative 2.5% Error	LBLQ01000996.1	17581	40194	-	99.7	75.54
NM_001077653.2	57057	CHM13 CA Conservative 2.5% Error	LBLQ01000994.1	65867	68021	-	100	25
NM_001024457.3	400966	CHM13 CA Conservative 2.5% Error	LBLQ01000718.1	4572	50760	-	98.51	76.91
NM_001024457.3	400966	CHM13 CA Conservative 2.5% Error	LBLQ01001304.1	7730	9184	+	98.49	21.74
NM_001078170.2	729857	CHM13 CA Conservative 2.5% Error	LBLQ01000717.1	175817	207468	-	99.86	54.64
NM_001078170.2	729857	CHM13 CA Conservative 2.5% Error	LBLQ01002259.1	3103	26589	-	99.81	39.48
NM_001078170.2	729857	CHM13 CA Conservative 2.5% Error	LBLQ01002368.1	24590	34101	+	99.55	8.06
NM_001167674.1	253559	CHM13 CA Conservative 2.5% Error	LBLQ01009490.1	287841	560234	+	99.93	92.84
NM_001167674.1	253559	CHM13 CA Conservative 2.5% Error	LBLQ01000778.1	568996	569685	-	99.85	7.2
NM_001167675.1	253559	CHM13 CA Conservative 2.5% Error	LBLQ01009490.1	287841	560234	+	99.93	92.49
NM_001167675.1	253559	CHM13 CA Conservative 2.5% Error	LBLQ01000778.1	568999	569685	-	100	7.24
NM_001001671.3	389840	CHM13 CA Conservative 2.5% Error	LBLQ01003307.1	4090	59291	+	99.87	69.04
NM_001001671.3	389840	CHM13 CA Conservative 2.5% Error	LBLQ01000743.1	6432	96277	-	99.93	31.1
NM_138803.3	130940	CHM13 CA Conservative 2.5% Error	LBLQ01003137.1	5174996	5348958	-	99.7	84.32
NM_138803.3	130940	CHM13 CA Conservative 2.5% Error	LBLQ01001468.1	672	99026	-	99.14	16.37
NM_015678.4	26960	CHM13 CA Conservative 2.5% Error	LBLQ01005041.1	26277584	26525127	-	99.79	39.93
NM_015678.4	26960	CHM13 CA Conservative 2.5% Error	LBLQ01005042.1	17235	427280	-	100	60.26
NM_173653.3	285195	CHM13 CA Conservative 2.5% Error	LBLQ01000358.1	11622	130588	+	99.44	54.75
NM_173653.3	285195	CHM13 CA Conservative 2.5% Error	LBLQ01000355.1	72586	454133	-	99.94	46.01
NM_001637.3	313	CHM13 CA Conservative 2.5% Error	LBLQ01000997.1	5964	181945	-	99.54	63.19
NM_001637.3	313	CHM13 CA Conservative 2.5% Error	LBLQ01000996.1	1298306	1325863	-	98.12	36.47
NM_001177506.1	313	CHM13 CA Conservative 2.5% Error	LBLQ01000997.1	5964	181945	-	99.54	60.25
NM_001177506.1	313	CHM13 CA Conservative 2.5% Error	LBLQ01000996.1	1298306	1325863	-	98.34	39.42
NM_001177507.1	313	CHM13 CA Conservative 2.5% Error	LBLQ01000997.1	5964	181945	-	99.51	61.68
NM_001177507.1	313	CHM13 CA Conservative 2.5% Error	LBLQ01000996.1	1298306	1325863	-	98.12	37.96
NM_001178055.1	79668	CHM13 CA Conservative 2.5% Error	LBLQ01001613.1	77578	173980	+	99.92	95.47
NM_001178055.1	79668	CHM13 CA Conservative 2.5% Error	LBLQ01009904.1	23777	26006	+	100	4.55
NM_024615.3	79668	CHM13 CA Conservative 2.5% Error	LBLQ01001613.1	77578	173980	+	99.92	95.79
NM_024615.3	79668	CHM13 CA Conservative 2.5% Error	LBLQ01009904.1	24819	26006	+	100	4.23
NM_001178056.1	79668	CHM13 CA Conservative 2.5% Error	LBLQ01001613.1	77578	173980	+	99.92	95.71
NM_001178056.1	79668	CHM13 CA Conservative 2.5% Error	LBLQ01009904.1	24819	26006	+	100	4.31
NM_178566.4	340481	CHM13 CA Conservative 2.5% Error	LBLQ01000483.1	3180	54333	+	99.73	92.04
NM_178566.4	340481	CHM13 CA Conservative 2.5% Error	LBLQ01000221.1	941427	972841	+	99.88	9.2
NM_018196.3	55217	CHM13 CA Conservative 2.5% Error	LBLQ01001737.1	1	107496	-	99.91	30.67
NM_018196.3	55217	CHM13 CA Conservative 2.5% Error	LBLQ01001735.1	110635	114135	-	99.53	70.81
NM_080630.3	1301	CHM13 CA Conservative 2.5% Error	LBLQ01010121.1	16823	171617	+	99.93	86.07
NM_080630.3	1301	CHM13 CA Conservative 2.5% Error	LBLQ01001277.1	25185	59050	-	100	13.93
NM_001190709.1	1301	CHM13 CA Conservative 2.5% Error	LBLQ01010121.1	16823	171617	+	99.93	86.52
NM_001190709.1	1301	CHM13 CA Conservative 2.5% Error	LBLQ01001277.1	25185	59050	-	100	13.48
NM_005932.3	4285	CHM13 CA Conservative 2.5% Error	LBLQ01001147.1	2020432	2103954	+	99.94	80.82
NM_005932.3	4285	CHM13 CA Conservative 2.5% Error	LBLQ01002202.1	4250826	4280846	-	100	18.64
NM_001079877.2	10156	CHM13 CA Conservative 2.5% Error	LBLQ01000988.1	25953	40841	-	99.86	79.18
NM_001079877.2	10156	CHM13 CA Conservative 2.5% Error	LBLQ01000985.1	1	21188	-	99.9	18.3
NM_006989.5	10156	CHM13 CA Conservative 2.5% Error	LBLQ01000988.1	25953	40841	-	99.86	79.7
NM_006989.5	10156	CHM13 CA Conservative 2.5% Error	LBLQ01000985.1	1	21188	-	99.9	17.85
NM_007086.3	11169	CHM13 CA Conservative 2.5% Error	LBLQ01000391.1	9420	80969	-	99.96	51.93
NM_007086.3	11169	CHM13 CA Conservative 2.5% Error	LBLQ01000390.1	9484514	9492309	-	99.72	48.37
NM_001008396.2	11169	CHM13 CA Conservative 2.5% Error	LBLQ01000391.1	9420	80969	-	99.96	51.18
NM_001008396.2	11169	CHM13 CA Conservative 2.5% Error	LBLQ01000390.1	9484514	9492309	-	99.72	49.13
NM_032777.9	25960	CHM13 CA Conservative 2.5% Error	LBLQ01000457.1	5466447	5481163	-	100	86.8
NM_032777.9	25960	CHM13 CA Conservative 2.5% Error	LBLQ01000458.1	11607	29708	-	99.18	12.16
NM_001097613.2	653519	CHM13 CA Conservative 2.5% Error	LBLQ01000678.1	570	23853	+	99.79	48.7
NM_001097613.2	653519	CHM13 CA Conservative 2.5% Error	LBLQ01000677.1	2715	25757	+	99.73	37.19
NM_022359.5	9659	CHM13 CA Conservative 2.5% Error	LBLQ01000636.1	2297	71009	+	97.72	66.5
NM_022359.5	9659	CHM13 CA Conservative 2.5% Error	LBLQ01000634.1	10703	15033	+	98.13	34.07
NM_052958.2	116328	CHM13 CA Conservative 2.5% Error	LBLQ01008264.1	4793	355132	+	100	66.55
NM_052958.2	116328	CHM13 CA Conservative 2.5% Error	LBLQ01008261.1	2953223	3080068	+	97.01	38.24
NM_001195639.1	116328	CHM13 CA Conservative 2.5% Error	LBLQ01008264.1	4793	71937	+	99.96	77.95
NM_001195639.1	116328	CHM13 CA Conservative 2.5% Error	LBLQ01008261.1	2953223	3068967	+	100	21.99
NM_001198542.1	54768	CHM13 CA Conservative 2.5% Error	LBLQ01001002.1	48651	147058	-	99.45	63.38
NM_001198542.1	54768	CHM13 CA Conservative 2.5% Error	LBLQ01001004.1	1075	79147	-	100	30.42
NM_001198543.1	54768	CHM13 CA Conservative 2.5% Error	LBLQ01001002.1	48651	147058	-	99.45	63.99
NM_001198543.1	54768	CHM13 CA Conservative 2.5% Error	LBLQ01001004.1	1075	79147	-	100	29.75
NM_001198963.1	2218	CHM13 CA Conservative 2.5% Error	LBLQ01000283.1	148700	193230	-	99.9	87.26
NM_001198963.1	2218	CHM13 CA Conservative 2.5% Error	LBLQ01000284.1	3	38498	-	99.73	15.21
NM_003502.3	8312	CHM13 CA Conservative 2.5% Error	LBLQ01003436.1	1	58844	+	99.66	72.65
NM_003502.3	8312	CHM13 CA Conservative 2.5% Error	LBLQ01003431.1	19619	26177	+	98.54	35.29
NM_181050.2	8312	CHM13 CA Conservative 2.5% Error	LBLQ01003436.1	1	58844	+	99.64	71.81
NM_181050.2	8312	CHM13 CA Conservative 2.5% Error	LBLQ01003431.1	19619	26148	+	99.84	35.54
NM_001100117.2	9699	CHM13 CA Conservative 2.5% Error	LBLQ01000451.1	5117178	5486268	-	99.91	87.71
NM_001100117.2	9699	CHM13 CA Conservative 2.5% Error	LBLQ01008867.1	28082	293877	-	99.88	12.38
NM_001199417.1	57636	CHM13 CA Conservative 2.5% Error	LBLQ01008425.1	18125	40421	-	99.96	49.28
NM_001199417.1	57636	CHM13 CA Conservative 2.5% Error	LBLQ01005118.1	128883	172435	+	99.3	36.51
NM_001199417.1	57636	CHM13 CA Conservative 2.5% Error	LBLQ01002136.1	13038	42169	-	96.96	28.24
NM_001200001.1	4853	CHM13 CA Conservative 2.5% Error	LBLQ01000624.1	2580862	2643096	-	99.94	83.57
NM_001200001.1	4853	CHM13 CA Conservative 2.5% Error	LBLQ01001617.1	17988	18378	+	95.94	8.87
NM_001200001.1	4853	CHM13 CA Conservative 2.5% Error	LBLQ01000625.1	17565	17825	-	98.09	5.98
NM_024408.3	4853	CHM13 CA Conservative 2.5% Error	LBLQ01000624.1	2557302	2643096	-	99.98	93.82
NM_024408.3	4853	CHM13 CA Conservative 2.5% Error	LBLQ01001617.1	17988	18378	+	95.94	3.34
NM_024408.3	4853	CHM13 CA Conservative 2.5% Error	LBLQ01000625.1	17565	17825	-	98.09	2.25
NM_001123.3	132	CHM13 CA Conservative 2.5% Error	LBLQ01002167.1	1892	486783	+	100	79.25
NM_001123.3	132	CHM13 CA Conservative 2.5% Error	LBLQ01001296.1	13602	37960	-	99.78	20.8
NM_001202449.1	132	CHM13 CA Conservative 2.5% Error	LBLQ01002167.1	63574	486783	+	98.96	82.25
NM_001202449.1	132	CHM13 CA Conservative 2.5% Error	LBLQ01001296.1	13603	37960	-	99.78	21.26
NM_016434.3	51750	CHM13 CA Conservative 2.5% Error	LBLQ01005682.1	2748	38167	-	99.63	77.06
NM_016434.3	51750	CHM13 CA Conservative 2.5% Error	LBLQ01008193.1	278897	280781	-	99.73	22.98
NM_032957.4	51750	CHM13 CA Conservative 2.5% Error	LBLQ01005682.1	2748	38167	-	99.64	77.38
NM_032957.4	51750	CHM13 CA Conservative 2.5% Error	LBLQ01008193.1	278897	280781	-	99.73	22.65
NM_001204352.1	50859	CHM13 CA Conservative 2.5% Error	LBLQ01000613.1	163915	185255	-	99.71	69.58
NM_001204352.1	50859	CHM13 CA Conservative 2.5% Error	LBLQ01000617.1	3695	469768	-	97.05	35.24
NM_001204353.1	50859	CHM13 CA Conservative 2.5% Error	LBLQ01000613.1	163915	185255	-	99.71	76.15
NM_001204353.1	50859	CHM13 CA Conservative 2.5% Error	LBLQ01000617.1	3695	469604	-	96.1	29.13
NM_001204354.1	50859	CHM13 CA Conservative 2.5% Error	LBLQ01000613.1	163915	185255	-	99.71	72.59
NM_001204354.1	50859	CHM13 CA Conservative 2.5% Error	LBLQ01000617.1	3695	469768	-	96.65	32.44
NM_001204355.1	50859	CHM13 CA Conservative 2.5% Error	LBLQ01000613.1	163915	185255	-	99.71	75.55
NM_001204355.1	50859	CHM13 CA Conservative 2.5% Error	LBLQ01000617.1	3695	469768	-	96.2	29.69
NM_001204358.1	50859	CHM13 CA Conservative 2.5% Error	LBLQ01000613.1	184612	185255	-	100	43.1
NM_001204358.1	50859	CHM13 CA Conservative 2.5% Error	LBLQ01000617.1	5963	469768	-	98.67	58.16
NM_001204356.1	50859	CHM13 CA Conservative 2.5% Error	LBLQ01000613.1	163915	185257	-	99.71	74.54
NM_001204356.1	50859	CHM13 CA Conservative 2.5% Error	LBLQ01000617.1	108691	469768	-	97.55	28.56
NM_001204478.1	100533496	CHM13 CA Conservative 2.5% Error	LBLQ01001154.1	102558	106829	+	100	77.86
NM_001204478.1	100533496	CHM13 CA Conservative 2.5% Error	LBLQ01001152.1	3083	20922	+	99.84	22.04
NM_016377.3	9465	CHM13 CA Conservative 2.5% Error	LBLQ01001001.1	46442	48447	+	100	68.37
NM_016377.3	9465	CHM13 CA Conservative 2.5% Error	LBLQ01000998.1	1517177	1601307	+	100	31.66
NM_001077261.3	9612	CHM13 CA Conservative 2.5% Error	LBLQ01008579.1	2577631	2610055	-	99.41	61.16
NM_001077261.3	9612	CHM13 CA Conservative 2.5% Error	LBLQ01000408.1	3321292	3541020	+	99.9	47.62
NM_006312.5	9612	CHM13 CA Conservative 2.5% Error	LBLQ01008579.1	2577631	2610032	-	99.44	61.3
NM_006312.5	9612	CHM13 CA Conservative 2.5% Error	LBLQ01000408.1	3321292	3541020	+	99.9	47.05
NM_001206654.1	9612	CHM13 CA Conservative 2.5% Error	LBLQ01008579.1	2577631	2610055	-	99.43	61.77
NM_001206654.1	9612	CHM13 CA Conservative 2.5% Error	LBLQ01000408.1	3321292	3541020	+	99.9	46.87
NM_001206744.1	7173	CHM13 CA Conservative 2.5% Error	LBLQ01005981.1	4786	110567	-	99.48	86.67
NM_001206744.1	7173	CHM13 CA Conservative 2.5% Error	LBLQ01001787.1	17913	20047	+	100	13.94
NM_001206745.1	7173	CHM13 CA Conservative 2.5% Error	LBLQ01005981.1	4786	110567	-	99.45	85.9
NM_001206745.1	7173	CHM13 CA Conservative 2.5% Error	LBLQ01001787.1	17913	20047	+	100	14.74
NM_018702.3	105	CHM13 CA Conservative 2.5% Error	LBLQ01006836.1	7612	64478	+	99.42	80.06
NM_018702.3	105	CHM13 CA Conservative 2.5% Error	LBLQ01001187.1	5068478	5562637	+	99.58	20.19
NM_001040272.5	92949	CHM13 CA Conservative 2.5% Error	LBLQ01001140.1	14343	267384	+	99.75	87.45
NM_001040272.5	92949	CHM13 CA Conservative 2.5% Error	LBLQ01005302.1	2476289	2641639	+	99.79	12.57
NM_052866.4	92949	CHM13 CA Conservative 2.5% Error	LBLQ01001140.1	14343	41663	+	100	47.74
NM_052866.4	92949	CHM13 CA Conservative 2.5% Error	LBLQ01005302.1	2476289	2641639	+	99.79	52.3
NM_001242480.1	389831	CHM13 CA Conservative 2.5% Error	LBLQ01003268.1	14420	42800	-	98.78	91.62
NM_001242480.1	389831	CHM13 CA Conservative 2.5% Error	LBLQ01006440.1	22098	34684	+	97.74	10.9
NM_001242672.1	100287898	CHM13 CA Conservative 2.5% Error	LBLQ01008202.1	317190	321390	-	99.9	57.4
NM_001242672.1	100287898	CHM13 CA Conservative 2.5% Error	LBLQ01001866.1	377618	383695	+	100	42.92
NM_001242863.1	55068	CHM13 CA Conservative 2.5% Error	LBLQ01001246.1	46513	501006	+	99.88	89.13
NM_001242863.1	55068	CHM13 CA Conservative 2.5% Error	LBLQ01001210.1	85119	93059	-	96.89	12.74
NM_017993.3	55068	CHM13 CA Conservative 2.5% Error	LBLQ01001246.1	46513	501006	+	99.88	89.22
NM_017993.3	55068	CHM13 CA Conservative 2.5% Error	LBLQ01001210.1	92729	93059	-	100	10.86
NM_020344.3	25769	CHM13 CA Conservative 2.5% Error	LBLQ01001140.1	863640	884305	-	99.6	84.74
NM_020344.3	25769	CHM13 CA Conservative 2.5% Error	LBLQ01000353.1	8397809	8665153	+	99.78	17.38
NM_001193288.2	25769	CHM13 CA Conservative 2.5% Error	LBLQ01001140.1	863640	884305	-	99.6	85.14
NM_001193288.2	25769	CHM13 CA Conservative 2.5% Error	LBLQ01000353.1	8397809	8665153	+	99.78	16.99
NM_001244714.1	55277	CHM13 CA Conservative 2.5% Error	LBLQ01000289.1	41685	285924	-	100	45.16
NM_001244714.1	55277	CHM13 CA Conservative 2.5% Error	LBLQ01000287.1	2949951	3054760	-	97.8	38.21
NM_001244714.1	55277	CHM13 CA Conservative 2.5% Error	LBLQ01000288.1	20041	50614	-	99.69	19.39
NM_205843.2	4782	CHM13 CA Conservative 2.5% Error	LBLQ01002528.1	466948	511053	-	99.61	91.84
NM_205843.2	4782	CHM13 CA Conservative 2.5% Error	LBLQ01002530.1	45552	68229	-	99.84	8.13
NM_001245002.1	4782	CHM13 CA Conservative 2.5% Error	LBLQ01002528.1	466948	511053	-	99.61	92.1
NM_001245002.1	4782	CHM13 CA Conservative 2.5% Error	LBLQ01002530.1	45552	61228	-	99.84	7.87
NM_005597.3	4782	CHM13 CA Conservative 2.5% Error	LBLQ01002528.1	466948	511053	-	99.59	91.86
NM_005597.3	4782	CHM13 CA Conservative 2.5% Error	LBLQ01002530.1	45552	61228	-	99.84	8.11
NM_001245004.1	4782	CHM13 CA Conservative 2.5% Error	LBLQ01002528.1	466948	511053	-	99.6	91.95
NM_001245004.1	4782	CHM13 CA Conservative 2.5% Error	LBLQ01002530.1	45552	61228	-	99.84	8.02
NM_001245005.1	4782	CHM13 CA Conservative 2.5% Error	LBLQ01002528.1	466948	511053	-	99.6	91.68
NM_001245005.1	4782	CHM13 CA Conservative 2.5% Error	LBLQ01002530.1	45552	68229	-	99.84	8.29
NM_001251967.1	50859	CHM13 CA Conservative 2.5% Error	LBLQ01000613.1	163915	185255	-	99.71	79.03
NM_001251967.1	50859	CHM13 CA Conservative 2.5% Error	LBLQ01000617.1	3695	469768	-	95.54	26.45
NM_022662.3	64682	CHM13 CA Conservative 2.5% Error	LBLQ01001976.1	1351	76674	-	99.7	52.84
NM_022662.3	64682	CHM13 CA Conservative 2.5% Error	LBLQ01000716.1	10992	38325	-	99.74	41.24
NM_001130690.2	10846	CHM13 CA Conservative 2.5% Error	LBLQ01002084.1	4492926	4509144	-	100	74.75
NM_001130690.2	10846	CHM13 CA Conservative 2.5% Error	LBLQ01002085.1	3175	286647	-	100	25.24
NM_006281.3	6788	CHM13 CA Conservative 2.5% Error	LBLQ01001426.1	864038	1116772	-	99.95	82.6
NM_006281.3	6788	CHM13 CA Conservative 2.5% Error	LBLQ01001427.1	12589	109449	-	89.1	23.33
NM_001256313.1	6788	CHM13 CA Conservative 2.5% Error	LBLQ01001426.1	864038	1005613	-	99.95	80.6
NM_001256313.1	6788	CHM13 CA Conservative 2.5% Error	LBLQ01001427.1	12589	109439	-	96.7	22.85
NM_001256312.1	6788	CHM13 CA Conservative 2.5% Error	LBLQ01001426.1	864038	1116772	-	99.95	73.66
NM_001256312.1	6788	CHM13 CA Conservative 2.5% Error	LBLQ01001427.1	12589	225919	-	92.66	31.63
NM_001256629.1	9024	CHM13 CA Conservative 2.5% Error	LBLQ01002998.1	543061	555967	-	99.64	61.08
NM_001256629.1	9024	CHM13 CA Conservative 2.5% Error	LBLQ01002999.1	1783	65444	-	99.52	45.24
NM_001256627.1	9024	CHM13 CA Conservative 2.5% Error	LBLQ01002998.1	543061	555967	-	99.62	64.67
NM_001256627.1	9024	CHM13 CA Conservative 2.5% Error	LBLQ01002999.1	1783	65444	-	99.52	41.04
NM_003957.3	9024	CHM13 CA Conservative 2.5% Error	LBLQ01002998.1	543061	555967	-	99.63	60.64
NM_003957.3	9024	CHM13 CA Conservative 2.5% Error	LBLQ01002999.1	1783	65444	-	99.52	45.76
NM_001256630.1	9024	CHM13 CA Conservative 2.5% Error	LBLQ01002998.1	543061	557483	-	99.35	64.86
NM_001256630.1	9024	CHM13 CA Conservative 2.5% Error	LBLQ01002999.1	1783	44100	-	99.52	41.54
NM_001257362.1	100288966	CHM13 CA Conservative 2.5% Error	LBLQ01003332.1	3756	13873	-	99.81	60.62
NM_001257362.1	100288966	CHM13 CA Conservative 2.5% Error	LBLQ01002052.1	277004	299803	-	96.59	52.08
NM_001257998.1	55610	CHM13 CA Conservative 2.5% Error	LBLQ01001653.1	1712192	1834002	+	99.45	47.93
NM_001257998.1	55610	CHM13 CA Conservative 2.5% Error	LBLQ01001286.1	2990	23080	-	99.82	61.36
NM_017667.3	55610	CHM13 CA Conservative 2.5% Error	LBLQ01001653.1	1712192	1834002	+	99.45	47.68
NM_017667.3	55610	CHM13 CA Conservative 2.5% Error	LBLQ01001286.1	2990	23080	-	99.82	61.66
NM_152570.2	158038	CHM13 CA Conservative 2.5% Error	LBLQ01000353.1	175559	239873	+	100	82.63
NM_152570.2	158038	CHM13 CA Conservative 2.5% Error	LBLQ01000058.1	746486	1179743	+	99.32	18.2
NM_001258282.1	158038	CHM13 CA Conservative 2.5% Error	LBLQ01000353.1	237250	239873	+	100	83.14
NM_001258282.1	158038	CHM13 CA Conservative 2.5% Error	LBLQ01000058.1	252347	1179743	+	99.12	18.12
NM_005019.4	5136	CHM13 CA Conservative 2.5% Error	LBLQ01002803.1	121990	205946	-	99.52	80.58
NM_005019.4	5136	CHM13 CA Conservative 2.5% Error	LBLQ01000564.1	1334373	1632854	+	99.9	21.59
NM_001258312.1	5136	CHM13 CA Conservative 2.5% Error	LBLQ01002803.1	121990	205946	-	99.52	80.82
NM_001258312.1	5136	CHM13 CA Conservative 2.5% Error	LBLQ01000564.1	1334137	1632854	+	99.9	21.35
NM_001003683.2	5136	CHM13 CA Conservative 2.5% Error	LBLQ01002803.1	149859	205946	-	100	57.71
NM_001003683.2	5136	CHM13 CA Conservative 2.5% Error	LBLQ01000564.1	1334137	1632854	+	99.9	47.24
NM_001258313.1	5136	CHM13 CA Conservative 2.5% Error	LBLQ01002803.1	149859	205946	-	100	53.29
NM_001258313.1	5136	CHM13 CA Conservative 2.5% Error	LBLQ01000564.1	1429669	1632854	+	99.91	51.28
NM_001258314.1	5136	CHM13 CA Conservative 2.5% Error	LBLQ01002803.1	149859	205946	-	100	61.83
NM_001258314.1	5136	CHM13 CA Conservative 2.5% Error	LBLQ01000564.1	1614645	1632854	+	99.77	43.47
NM_001258414.1	115584	CHM13 CA Conservative 2.5% Error	LBLQ01001386.1	3307	27396	-	100	25.75
NM_001258414.1	115584	CHM13 CA Conservative 2.5% Error	LBLQ01001385.1	3424355	3466576	-	98.54	75.97
NM_001261424.1	151242	CHM13 CA Conservative 2.5% Error	LBLQ01002803.1	43409	113335	+	99.42	85.35
NM_001261424.1	151242	CHM13 CA Conservative 2.5% Error	LBLQ01001523.1	1163397	1163764	+	100	12.05
NM_001080545.2	151242	CHM13 CA Conservative 2.5% Error	LBLQ01002803.1	43409	99719	+	98.92	59.92
NM_001080545.2	151242	CHM13 CA Conservative 2.5% Error	LBLQ01001523.1	1163397	1180590	+	94.42	51.02
NM_001261425.1	151242	CHM13 CA Conservative 2.5% Error	LBLQ01002803.1	43409	113335	+	99.42	85.94
NM_001261425.1	151242	CHM13 CA Conservative 2.5% Error	LBLQ01001523.1	1163397	1163764	+	100	12.13
NM_002613.4	5170	CHM13 CA Conservative 2.5% Error	LBLQ01001769.1	2191122	2216881	-	99.9	88.09
NM_002613.4	5170	CHM13 CA Conservative 2.5% Error	LBLQ01001981.1	431154	451158	+	100	6.01
NM_031268.5	5170	CHM13 CA Conservative 2.5% Error	LBLQ01001769.1	2191122	2216886	-	99.85	93.06
NM_031268.5	5170	CHM13 CA Conservative 2.5% Error	LBLQ01001981.1	431154	451158	+	100	6.35
NM_001261816.1	5170	CHM13 CA Conservative 2.5% Error	LBLQ01001769.1	2191122	2216881	-	99.9	87.74
NM_001261816.1	5170	CHM13 CA Conservative 2.5% Error	LBLQ01001981.1	431154	451158	+	100	6.2
NM_033338.5	840	CHM13 CA Conservative 2.5% Error	LBLQ01001295.1	1470728	1482579	-	99.68	81.57
NM_033338.5	840	CHM13 CA Conservative 2.5% Error	LBLQ01000385.1	18750	31172	-	99.76	15.36
NM_033339.4	840	CHM13 CA Conservative 2.5% Error	LBLQ01001295.1	1470728	1482579	-	99.68	82.58
NM_033339.4	840	CHM13 CA Conservative 2.5% Error	LBLQ01000385.1	18750	31172	-	99.73	14.32
NM_001227.4	840	CHM13 CA Conservative 2.5% Error	LBLQ01001295.1	1470728	1482581	-	99.63	85.02
NM_001227.4	840	CHM13 CA Conservative 2.5% Error	LBLQ01000385.1	30863	31172	-	99.67	11.89
NM_033340.3	840	CHM13 CA Conservative 2.5% Error	LBLQ01001295.1	1470728	1482579	-	99.67	88.99
NM_033340.3	840	CHM13 CA Conservative 2.5% Error	LBLQ01000385.1	4385	31679	-	96.56	15.42
NM_001267057.1	840	CHM13 CA Conservative 2.5% Error	LBLQ01001295.1	1470728	1480644	-	99.95	84.09
NM_001267057.1	840	CHM13 CA Conservative 2.5% Error	LBLQ01000385.1	13217	31172	-	99.76	15.92
NM_014425.3	27130	CHM13 CA Conservative 2.5% Error	LBLQ01000286.1	5263220	5299446	-	99.95	56.72
NM_014425.3	27130	CHM13 CA Conservative 2.5% Error	LBLQ01002894.1	1876	157428	-	94.63	46.49
NM_183245.2	27130	CHM13 CA Conservative 2.5% Error	LBLQ01000286.1	5263220	5299446	-	100	50.19
NM_183245.2	27130	CHM13 CA Conservative 2.5% Error	LBLQ01002894.1	1876	157428	-	94.63	53.5
NM_001040135.2	57180	CHM13 CA Conservative 2.5% Error	LBLQ01002425.1	850696	851619	-	100	46.03
NM_001040135.2	57180	CHM13 CA Conservative 2.5% Error	LBLQ01001938.1	14374	67004	+	97.16	47.04
NM_020445.5	57180	CHM13 CA Conservative 2.5% Error	LBLQ01002425.1	850696	853954	-	99.73	51.28
NM_020445.5	57180	CHM13 CA Conservative 2.5% Error	LBLQ01001938.1	14374	67004	+	97.63	41.65
NM_007014.4	11060	CHM13 CA Conservative 2.5% Error	LBLQ01009198.1	20047	121725	-	99.8	88.86
NM_007014.4	11060	CHM13 CA Conservative 2.5% Error	LBLQ01000470.1	3396	40405	-	100	11.19
NM_001270454.1	11060	CHM13 CA Conservative 2.5% Error	LBLQ01009198.1	20047	121725	-	99.8	89.9
NM_001270454.1	11060	CHM13 CA Conservative 2.5% Error	LBLQ01000470.1	3396	40405	-	100	10.16
NM_001270455.1	11060	CHM13 CA Conservative 2.5% Error	LBLQ01009198.1	51420	121725	-	99.91	82.92
NM_001270455.1	11060	CHM13 CA Conservative 2.5% Error	LBLQ01000470.1	3396	40405	-	100	17.26
NM_001270837.1	1397	CHM13 CA Conservative 2.5% Error	LBLQ01002600.1	20	1067	+	100	44.09
NM_001270837.1	1397	CHM13 CA Conservative 2.5% Error	LBLQ01010131.1	5322306	5329950	+	97.3	38.49
NM_017558.4	54768	CHM13 CA Conservative 2.5% Error	LBLQ01001002.1	44333	147058	-	99.43	67.13
NM_017558.4	54768	CHM13 CA Conservative 2.5% Error	LBLQ01001004.1	1075	79147	-	100	27.62
NM_001270974.1	54768	CHM13 CA Conservative 2.5% Error	LBLQ01002218.1	1623	166622	+	99.6	68.41
NM_001270974.1	54768	CHM13 CA Conservative 2.5% Error	LBLQ01001002.1	2135	147058	-	99.57	17.95
NM_001270974.1	54768	CHM13 CA Conservative 2.5% Error	LBLQ01001004.1	1075	79147	-	100	6.52
NM_001270974.1	54768	CHM13 CA Conservative 2.5% Error	LBLQ01002220.1	2118	13316	+	99.64	7.2
NM_001271208.1	4703	CHM13 CA Conservative 2.5% Error	LBLQ01000400.1	17	137515	-	99.9	54.35
NM_001271208.1	4703	CHM13 CA Conservative 2.5% Error	LBLQ01000397.1	4332976	4441668	-	99.9	44.14
NM_001271872.1	653464	CHM13 CA Conservative 2.5% Error	LBLQ01006533.1	4411	10909	+	100	56.83
NM_001271872.1	653464	CHM13 CA Conservative 2.5% Error	LBLQ01002292.1	33749	106868	+	98.4	24.23
NM_022479.2	64409	CHM13 CA Conservative 2.5% Error	LBLQ01000910.1	205997	583622	+	100	85.67
NM_022479.2	64409	CHM13 CA Conservative 2.5% Error	LBLQ01000041.1	13735	14241	+	99.6	14.41
NM_001277083.1	653781	CHM13 CA Conservative 2.5% Error	LBLQ01003358.1	68476	101070	+	94.58	87.91
NM_001277083.1	653781	CHM13 CA Conservative 2.5% Error	LBLQ01004116.1	2310	17879	-	98.64	11.29
NM_001082575.2	146713	CHM13 CA Conservative 2.5% Error	LBLQ01001850.1	2223611	2250033	-	100	84.01
NM_001082575.2	146713	CHM13 CA Conservative 2.5% Error	LBLQ01001851.1	83140	365114	-	99.79	15.96
NM_183380.3	667	CHM13 CA Conservative 2.5% Error	LBLQ01001244.1	23317	324565	+	99.88	97
NM_183380.3	667	CHM13 CA Conservative 2.5% Error	LBLQ01001243.1	514232	514842	+	99.83	3.38
NM_001144769.2	667	CHM13 CA Conservative 2.5% Error	LBLQ01001244.1	47249	324565	+	99.98	96.33
NM_001144769.2	667	CHM13 CA Conservative 2.5% Error	LBLQ01001243.1	405832	520486	+	98.47	3.98
NM_178450.4	115123	CHM13 CA Conservative 2.5% Error	LBLQ01000297.1	229124	239810	-	99.78	78.4
NM_178450.4	115123	CHM13 CA Conservative 2.5% Error	LBLQ01000572.1	24645	140534	-	100	21.63
NM_001277406.1	653269	CHM13 CA Conservative 2.5% Error	LBLQ01003358.1	68476	100920	+	94.81	88.04
NM_001277406.1	653269	CHM13 CA Conservative 2.5% Error	LBLQ01004116.1	2310	17879	-	98.64	11.46
NM_001039703.5	100132406	CHM13 CA Conservative 2.5% Error	LBLQ01000690.1	156	33458	-	97.73	47.51
NM_001039703.5	100132406	CHM13 CA Conservative 2.5% Error	LBLQ01000697.1	465	20119	-	95.36	22.48
NM_017940.4	55672	CHM13 CA Conservative 2.5% Error	LBLQ01000902.1	22654	38270	-	99.11	52.79
NM_017940.4	55672	CHM13 CA Conservative 2.5% Error	LBLQ01006541.1	2785	27186	+	96.96	46.32
NM_017940.4	55672	CHM13 CA Conservative 2.5% Error	LBLQ01003577.1	4879	9975	-	100	8.73
NM_001277961.1	6786	CHM13 CA Conservative 2.5% Error	LBLQ01000218.1	15774	85104	+	99.97	80.8
NM_001277961.1	6786	CHM13 CA Conservative 2.5% Error	LBLQ01008445.1	43439	44145	-	100	16.14
NM_001277962.1	6786	CHM13 CA Conservative 2.5% Error	LBLQ01000218.1	15774	85104	+	99.96	79.48
NM_001277962.1	6786	CHM13 CA Conservative 2.5% Error	LBLQ01008445.1	43439	44145	-	100	17.24
NM_001278141.1	149013	CHM13 CA Conservative 2.5% Error	LBLQ01000641.1	23790	42705	-	97.37	53.11
NM_001278141.1	149013	CHM13 CA Conservative 2.5% Error	LBLQ01002932.1	1	25532	-	99.52	32.62
NM_001278141.1	149013	CHM13 CA Conservative 2.5% Error	LBLQ01000692.1	6682	19652	-	88.11	13.4
NM_001007237.2	3321	CHM13 CA Conservative 2.5% Error	LBLQ01001563.1	11274	72336	+	99.6	90.35
NM_001007237.2	3321	CHM13 CA Conservative 2.5% Error	LBLQ01001696.1	695475	696966	+	99.03	11.32
NM_001542.3	3321	CHM13 CA Conservative 2.5% Error	LBLQ01001563.1	13889	72336	+	99.63	91.79
NM_001542.3	3321	CHM13 CA Conservative 2.5% Error	LBLQ01001696.1	696274	696966	+	98.84	9.53
NM_001278224.1	55277	CHM13 CA Conservative 2.5% Error	LBLQ01000289.1	29989	80285	-	98.98	24.87
NM_001278224.1	55277	CHM13 CA Conservative 2.5% Error	LBLQ01000287.1	2949951	3052458	-	100	49.74
NM_001278224.1	55277	CHM13 CA Conservative 2.5% Error	LBLQ01000288.1	20041	50614	-	99.69	27.23
NM_001278267.1	100288142	CHM13 CA Conservative 2.5% Error	LBLQ01004878.1	1341	33251	+	96.83	28.04
NM_001278267.1	100288142	CHM13 CA Conservative 2.5% Error	LBLQ01001530.1	14229	38719	-	94.63	27.81
NM_001278267.1	100288142	CHM13 CA Conservative 2.5% Error	LBLQ01001540.1	197	25829	-	96.64	18.36
NM_001278267.1	100288142	CHM13 CA Conservative 2.5% Error	LBLQ01001534.1	249	23816	-	96.11	18.26
NM_001278267.1	100288142	CHM13 CA Conservative 2.5% Error	LBLQ01002394.1	1039	11363	-	95.75	8.85
NM_015383.2	25832	CHM13 CA Conservative 2.5% Error	LBLQ01000690.1	156	33458	-	97.24	50.06
NM_015383.2	25832	CHM13 CA Conservative 2.5% Error	LBLQ01000641.1	23685	42413	-	97.07	36.49
NM_015383.2	25832	CHM13 CA Conservative 2.5% Error	LBLQ01002555.1	538	7078	-	97.07	9.8
NM_173638.4	284565	CHM13 CA Conservative 2.5% Error	LBLQ01000641.1	23681	42705	-	98.67	89.58
NM_173638.4	284565	CHM13 CA Conservative 2.5% Error	LBLQ01002983.1	23655	31606	+	98.64	10.34
NM_001170755.2	284565	CHM13 CA Conservative 2.5% Error	LBLQ01000641.1	23681	42991	-	98.7	83.46
NM_001170755.2	284565	CHM13 CA Conservative 2.5% Error	LBLQ01002983.1	21002	37691	+	97.97	16.45
NM_014923.4	22862	CHM13 CA Conservative 2.5% Error	LBLQ01002796.1	3017157	3059694	-	100	84.67
NM_014923.4	22862	CHM13 CA Conservative 2.5% Error	LBLQ01000033.1	12579	48221	-	100	15.28
NM_001278438.1	22862	CHM13 CA Conservative 2.5% Error	LBLQ01002796.1	3017157	3059694	-	100	79.06
NM_001278438.1	22862	CHM13 CA Conservative 2.5% Error	LBLQ01000033.1	12579	181917	-	100	20.87
NM_130773.3	129684	CHM13 CA Conservative 2.5% Error	LBLQ01002491.1	9258	507506	+	99.97	86.15
NM_130773.3	129684	CHM13 CA Conservative 2.5% Error	LBLQ01001525.1	164311	381393	-	100	13.85
NM_005560.4	3911	CHM13 CA Conservative 2.5% Error	LBLQ01005682.1	1347063	1396732	+	99.63	64
NM_005560.4	3911	CHM13 CA Conservative 2.5% Error	LBLQ01000903.1	485	9188	+	99.82	35.92
NM_001198832.2	9659	CHM13 CA Conservative 2.5% Error	LBLQ01000643.1	1935	83737	+	99.44	85.88
NM_001198832.2	9659	CHM13 CA Conservative 2.5% Error	LBLQ01000636.1	2297	70565	+	97.27	8.42
NM_001198832.2	9659	CHM13 CA Conservative 2.5% Error	LBLQ01000634.1	46905	57877	+	97.4	5.65
NM_001198834.3	9659	CHM13 CA Conservative 2.5% Error	LBLQ01000643.1	11040	83737	+	99.59	88.72
NM_001198834.3	9659	CHM13 CA Conservative 2.5% Error	LBLQ01000636.1	28469	70565	+	97.55	9.7
NM_014644.5	9659	CHM13 CA Conservative 2.5% Error	LBLQ01000643.1	11040	83737	+	99.59	88.8
NM_014644.5	9659	CHM13 CA Conservative 2.5% Error	LBLQ01000636.1	28469	70565	+	97.55	9.64
NM_001002812.2	9659	CHM13 CA Conservative 2.5% Error	LBLQ01000643.1	11040	44277	+	99.79	80.59
NM_001002812.2	9659	CHM13 CA Conservative 2.5% Error	LBLQ01000636.1	28469	70565	+	97.55	16.7
NM_016134.3	10404	CHM13 CA Conservative 2.5% Error	LBLQ01002286.1	2641267	3025566	+	100	65.05
NM_016134.3	10404	CHM13 CA Conservative 2.5% Error	LBLQ01001642.1	2901	116974	+	100	39.96
NM_001042603.2	5927	CHM13 CA Conservative 2.5% Error	LBLQ01002947.1	9700	95774	+	100	93.28
NM_001042603.2	5927	CHM13 CA Conservative 2.5% Error	LBLQ01001547.1	14060	19484	-	99.86	6.72
NM_014799.3	9843	CHM13 CA Conservative 2.5% Error	LBLQ01002499.1	671177	758137	-	99.72	84.48
NM_014799.3	9843	CHM13 CA Conservative 2.5% Error	LBLQ01002704.1	776354	785926	+	100	16.33
NM_138737.4	9843	CHM13 CA Conservative 2.5% Error	LBLQ01002499.1	671177	750187	-	100	78.74
NM_138737.4	9843	CHM13 CA Conservative 2.5% Error	LBLQ01002704.1	774673	785926	+	99.89	21.24
NM_001130860.3	9843	CHM13 CA Conservative 2.5% Error	LBLQ01002499.1	671177	758137	-	99.5	81.88
NM_001130860.3	9843	CHM13 CA Conservative 2.5% Error	LBLQ01002704.1	776354	785926	+	100	19.72
NM_001282141.1	9843	CHM13 CA Conservative 2.5% Error	LBLQ01002499.1	671177	758137	-	99.41	79.2
NM_001282141.1	9843	CHM13 CA Conservative 2.5% Error	LBLQ01002704.1	776354	785926	+	100	22.63
NM_001282218.1	9024	CHM13 CA Conservative 2.5% Error	LBLQ01002998.1	543061	555967	-	99.64	61.27
NM_001282218.1	9024	CHM13 CA Conservative 2.5% Error	LBLQ01002999.1	1783	44809	-	99.51	45.06
NM_001283009.1	51750	CHM13 CA Conservative 2.5% Error	LBLQ01005682.1	2748	38167	-	99.63	74.51
NM_001283009.1	51750	CHM13 CA Conservative 2.5% Error	LBLQ01008193.1	278897	280781	-	99.77	25.54
NM_001283010.1	51750	CHM13 CA Conservative 2.5% Error	LBLQ01005682.1	2748	38167	-	99.63	75.69
NM_001283010.1	51750	CHM13 CA Conservative 2.5% Error	LBLQ01008193.1	278897	280781	-	99.73	24.35
NM_152730.5	221322	CHM13 CA Conservative 2.5% Error	LBLQ01001447.1	3008180	3182660	+	99.68	55.62
NM_152730.5	221322	CHM13 CA Conservative 2.5% Error	LBLQ01000781.1	253931	335510	-	99.71	48.79
NM_002457.3	4583	CHM13 CA Conservative 2.5% Error	LBLQ01002999.1	344562	362787	-	96.57	67.38
NM_002457.3	4583	CHM13 CA Conservative 2.5% Error	LBLQ01006543.1	29	12039	-	99.86	18.97
NM_001286568.1	84083	CHM13 CA Conservative 2.5% Error	LBLQ01000393.1	1583042	1661871	-	99.96	82.75
NM_001286568.1	84083	CHM13 CA Conservative 2.5% Error	LBLQ01000394.1	18325	249629	-	99.17	17.77
NM_001286569.1	84083	CHM13 CA Conservative 2.5% Error	LBLQ01000393.1	1583042	1661871	-	99.96	82.67
NM_001286569.1	84083	CHM13 CA Conservative 2.5% Error	LBLQ01000394.1	5199	249629	-	93.87	24.01
NM_032143.3	84083	CHM13 CA Conservative 2.5% Error	LBLQ01000393.1	1583042	1661871	-	99.96	83.93
NM_032143.3	84083	CHM13 CA Conservative 2.5% Error	LBLQ01000394.1	26943	250135	-	99.02	16.7
NM_017820.4	54932	CHM13 CA Conservative 2.5% Error	LBLQ01008674.1	25836	103230	-	99.77	76.01
NM_017820.4	54932	CHM13 CA Conservative 2.5% Error	LBLQ01005972.1	15200	18010	+	100	17.58
NM_001286835.1	220869	CHM13 CA Conservative 2.5% Error	LBLQ01002765.1	923	43985	-	99.69	79.92
NM_001286835.1	220869	CHM13 CA Conservative 2.5% Error	LBLQ01002552.1	763	18689	-	97.8	26.79
NM_001024916.3	220869	CHM13 CA Conservative 2.5% Error	LBLQ01002765.1	923	43985	-	99.71	64.39
NM_001024916.3	220869	CHM13 CA Conservative 2.5% Error	LBLQ01002552.1	1645	18689	-	98.36	41.19
NM_033641.3	1288	CHM13 CA Conservative 2.5% Error	LBLQ01003160.1	787944	853709	-	99.96	94.35
NM_033641.3	1288	CHM13 CA Conservative 2.5% Error	LBLQ01005671.1	56477	184146	-	100	5.63
NM_001287758.1	1288	CHM13 CA Conservative 2.5% Error	LBLQ01003160.1	787944	853709	-	99.92	94.4
NM_001287758.1	1288	CHM13 CA Conservative 2.5% Error	LBLQ01005671.1	56477	184146	-	100	5.59
NM_001287759.1	1288	CHM13 CA Conservative 2.5% Error	LBLQ01003160.1	787944	853709	-	99.96	94.29
NM_001287759.1	1288	CHM13 CA Conservative 2.5% Error	LBLQ01005671.1	56477	184146	-	100	5.69
NM_001287760.1	1288	CHM13 CA Conservative 2.5% Error	LBLQ01003160.1	787944	853709	-	99.96	94.21
NM_001287760.1	1288	CHM13 CA Conservative 2.5% Error	LBLQ01005671.1	43788	184146	-	97.32	6.79
NM_138570.3	124565	CHM13 CA Conservative 2.5% Error	LBLQ01005969.1	1250991	1286093	+	99.82	54.62
NM_138570.3	124565	CHM13 CA Conservative 2.5% Error	LBLQ01005970.1	5666	15197	+	99.87	50.35
NM_001037984.2	124565	CHM13 CA Conservative 2.5% Error	LBLQ01005969.1	1250991	1286093	+	99.82	37.55
NM_001037984.2	124565	CHM13 CA Conservative 2.5% Error	LBLQ01005970.1	5666	13877	+	99.75	18.19
NM_001037984.2	124565	CHM13 CA Conservative 2.5% Error	LBLQ01001851.1	2106077	2108325	-	99.75	45.05
NM_001847.3	1288	CHM13 CA Conservative 2.5% Error	LBLQ01003160.1	787944	853709	-	99.96	95.86
NM_001847.3	1288	CHM13 CA Conservative 2.5% Error	LBLQ01005671.1	56477	185213	-	100	4.14
NM_001288707.1	101929372	CHM13 CA Conservative 2.5% Error	LBLQ01002466.1	1026	2354	-	99.92	72.3
NM_001288707.1	101929372	CHM13 CA Conservative 2.5% Error	LBLQ01007239.1	1	1367	+	100	19.85
NM_006157.4	4745	CHM13 CA Conservative 2.5% Error	LBLQ01000580.1	1763046	2329613	+	99.54	53.51
NM_006157.4	4745	CHM13 CA Conservative 2.5% Error	LBLQ01000581.1	106561	311376	+	99.87	47.46
NM_201551.2	4745	CHM13 CA Conservative 2.5% Error	LBLQ01000580.1	1763046	2322840	+	99.94	55.03
NM_201551.2	4745	CHM13 CA Conservative 2.5% Error	LBLQ01000581.1	106561	311376	+	99.85	45.09
NM_001288713.1	4745	CHM13 CA Conservative 2.5% Error	LBLQ01000580.1	1763046	2329613	+	99.56	54.68
NM_001288713.1	4745	CHM13 CA Conservative 2.5% Error	LBLQ01000581.1	106561	311376	+	99.87	46.27
NM_001288714.1	4745	CHM13 CA Conservative 2.5% Error	LBLQ01000580.1	1763046	2329613	+	99.49	50.95
NM_001288714.1	4745	CHM13 CA Conservative 2.5% Error	LBLQ01000581.1	106561	311376	+	99.87	50.08
NM_201400.3	196483	CHM13 CA Conservative 2.5% Error	LBLQ01001768.1	2089	3525	+	99.86	59.64
NM_201400.3	196483	CHM13 CA Conservative 2.5% Error	LBLQ01010322.1	377	11695	-	96.99	42.59
NM_201598.3	196483	CHM13 CA Conservative 2.5% Error	LBLQ01001768.1	2089	3525	+	99.86	62.28
NM_201598.3	196483	CHM13 CA Conservative 2.5% Error	LBLQ01010322.1	377	11695	-	96.98	40.06
NM_001289029.1	196483	CHM13 CA Conservative 2.5% Error	LBLQ01001768.1	2089	3525	+	99.86	64.55
NM_001289029.1	196483	CHM13 CA Conservative 2.5% Error	LBLQ01010322.1	377	11695	-	96.93	37.88
NM_032194.2	84154	CHM13 CA Conservative 2.5% Error	LBLQ01001162.1	2256	14788	+	99.68	84.83
NM_032194.2	84154	CHM13 CA Conservative 2.5% Error	LBLQ01001161.1	1225550	1251671	+	99.65	15.68
NM_001289117.1	27231	CHM13 CA Conservative 2.5% Error	LBLQ01002528.1	1312	1906	-	100	27.31
NM_001289117.1	27231	CHM13 CA Conservative 2.5% Error	LBLQ01001573.1	958	3477	+	99.61	45.22
NM_001289111.1	84154	CHM13 CA Conservative 2.5% Error	LBLQ01001162.1	2256	14788	+	99.68	85.71
NM_001289111.1	84154	CHM13 CA Conservative 2.5% Error	LBLQ01001161.1	1225550	1251671	+	99.63	14.81
NM_031466.6	83696	CHM13 CA Conservative 2.5% Error	LBLQ01004420.1	745153	1318139	+	99.94	75.08
NM_031466.6	83696	CHM13 CA Conservative 2.5% Error	LBLQ01004421.1	37191	39050	+	100	24.81
NM_176820.3	338321	CHM13 CA Conservative 2.5% Error	LBLQ01004031.1	2865966	2887627	+	99.95	67.73
NM_176820.3	338321	CHM13 CA Conservative 2.5% Error	LBLQ01008427.1	21701	25860	-	100	27.43
NM_001258412.2	115584	CHM13 CA Conservative 2.5% Error	LBLQ01001386.1	1094	27396	-	100	28.23
NM_001258412.2	115584	CHM13 CA Conservative 2.5% Error	LBLQ01001385.1	3424355	3466537	-	99.82	74.36
NM_001160372.2	83696	CHM13 CA Conservative 2.5% Error	LBLQ01004420.1	745970	1318139	+	99.93	74.07
NM_001160372.2	83696	CHM13 CA Conservative 2.5% Error	LBLQ01004421.1	37191	39050	+	100	25.81
NM_052944.4	115584	CHM13 CA Conservative 2.5% Error	LBLQ01001386.1	3307	27028	-	100	23.06
NM_052944.4	115584	CHM13 CA Conservative 2.5% Error	LBLQ01001385.1	3424355	3466576	-	98.75	78.47
NM_001258413.2	115584	CHM13 CA Conservative 2.5% Error	LBLQ01001386.1	3307	27396	-	100	22.73
NM_001258413.2	115584	CHM13 CA Conservative 2.5% Error	LBLQ01001385.1	3424355	3466576	-	98.75	78.8
NM_001258411.2	115584	CHM13 CA Conservative 2.5% Error	LBLQ01001386.1	1094	27396	-	100	31.36
NM_001258411.2	115584	CHM13 CA Conservative 2.5% Error	LBLQ01001385.1	3424355	3466576	-	98.68	72.65
NM_001290083.1	199692	CHM13 CA Conservative 2.5% Error	LBLQ01001841.1	1673	6308	+	100	87.97
NM_001290083.1	199692	CHM13 CA Conservative 2.5% Error	LBLQ01008192.1	334020	341073	+	88.72	14.93
NM_001290118.1	100652748	CHM13 CA Conservative 2.5% Error	LBLQ01001550.1	5298	28023	+	100	86.29
NM_001290118.1	100652748	CHM13 CA Conservative 2.5% Error	LBLQ01001516.1	37639	37929	+	93.37	12.05
NM_001290117.1	100652748	CHM13 CA Conservative 2.5% Error	LBLQ01001550.1	5298	28023	+	100	87.07
NM_001290117.1	100652748	CHM13 CA Conservative 2.5% Error	LBLQ01001516.1	37639	37929	+	93.37	11.36
NM_001290210.1	100131827	CHM13 CA Conservative 2.5% Error	LBLQ01009351.1	4960	7122	+	99.44	60.13
NM_001290210.1	100131827	CHM13 CA Conservative 2.5% Error	LBLQ01010332.1	16983	19267	-	98.87	21.62
NM_001101663.4	200030	CHM13 CA Conservative 2.5% Error	LBLQ01000641.1	23685	42705	-	98.35	80.05
NM_001101663.4	200030	CHM13 CA Conservative 2.5% Error	LBLQ01002554.1	1375	20837	-	96.59	27.41
NM_001290209.1	100131827	CHM13 CA Conservative 2.5% Error	LBLQ01009751.1	20270	22737	-	98.39	82.56
NM_001290209.1	100131827	CHM13 CA Conservative 2.5% Error	LBLQ01010332.1	14890	19267	-	99.33	10.01
NM_001290208.1	100131827	CHM13 CA Conservative 2.5% Error	LBLQ01009751.1	20270	22737	-	98.39	83.37
NM_001290208.1	100131827	CHM13 CA Conservative 2.5% Error	LBLQ01010332.1	16983	19267	-	98.87	8.95
NM_183372.5	200030	CHM13 CA Conservative 2.5% Error	LBLQ01000641.1	23685	42450	-	98.5	67.2
NM_183372.5	200030	CHM13 CA Conservative 2.5% Error	LBLQ01002554.1	1375	29714	-	91.67	34.63
NM_130797.3	1804	CHM13 CA Conservative 2.5% Error	LBLQ01001946.1	272939	747017	+	99.22	87.88
NM_130797.3	1804	CHM13 CA Conservative 2.5% Error	LBLQ01006260.1	45276	45930	-	99.23	13.53
NM_001039350.2	1804	CHM13 CA Conservative 2.5% Error	LBLQ01001946.1	299001	747017	+	99.54	86.73
NM_001039350.2	1804	CHM13 CA Conservative 2.5% Error	LBLQ01002691.1	76791	77430	-	99.84	13.3
NM_001290253.1	1804	CHM13 CA Conservative 2.5% Error	LBLQ01001946.1	272939	441703	+	99.02	71.02
NM_001290253.1	1804	CHM13 CA Conservative 2.5% Error	LBLQ01006260.1	45284	45930	-	99.84	31.31
NM_080829.3	140876	CHM13 CA Conservative 2.5% Error	LBLQ01000906.1	7145	41172	+	99.94	89.35
NM_080829.3	140876	CHM13 CA Conservative 2.5% Error	LBLQ01000905.1	4599658	4599997	+	100	7.86
NM_001290268.1	140876	CHM13 CA Conservative 2.5% Error	LBLQ01000906.1	7145	41172	+	99.94	87.98
NM_001290268.1	140876	CHM13 CA Conservative 2.5% Error	LBLQ01000905.1	4544349	4544757	+	100	9.32
NM_207303.4	26033	CHM13 CA Conservative 2.5% Error	LBLQ01001392.1	4962541	5696006	-	99.91	80.17
NM_207303.4	26033	CHM13 CA Conservative 2.5% Error	LBLQ01001295.1	8566	105838	-	98.59	21.12
NM_001201380.2	728577	CHM13 CA Conservative 2.5% Error	LBLQ01001682.1	211	61794	+	99.26	64.1
NM_001201380.2	728577	CHM13 CA Conservative 2.5% Error	LBLQ01001680.1	21095	81502	+	98.89	26.74
NM_001201380.2	728577	CHM13 CA Conservative 2.5% Error	LBLQ01002988.1	16952	41850	+	99.5	9.51
NM_000947.4	5558	CHM13 CA Conservative 2.5% Error	LBLQ01001243.1	7910	42832	-	92.45	34.66
NM_000947.4	5558	CHM13 CA Conservative 2.5% Error	LBLQ01003699.1	607	48966	-	96.27	51.29
NM_000947.4	5558	CHM13 CA Conservative 2.5% Error	LBLQ01000441.1	23112	53351	-	100	14.08
NM_001276343.2	119016	CHM13 CA Conservative 2.5% Error	LBLQ01005650.1	119675	128195	-	99.74	79.2
NM_001276343.2	119016	CHM13 CA Conservative 2.5% Error	LBLQ01000491.1	4173	20217	+	99.54	26.11
NM_001291379.1	119016	CHM13 CA Conservative 2.5% Error	LBLQ01005650.1	119675	128196	-	99.74	73.61
NM_001291379.1	119016	CHM13 CA Conservative 2.5% Error	LBLQ01000491.1	2749	20217	+	99.2	23.15
NM_133446.3	119016	CHM13 CA Conservative 2.5% Error	LBLQ01005650.1	119675	128198	-	99.69	81.56
NM_133446.3	119016	CHM13 CA Conservative 2.5% Error	LBLQ01000491.1	4173	20217	+	99.49	24.03
NM_152286.4	375775	CHM13 CA Conservative 2.5% Error	LBLQ01008674.1	139465	181344	-	99.93	62.91
NM_152286.4	375775	CHM13 CA Conservative 2.5% Error	LBLQ01001421.1	666383	711315	+	100	33.95
NM_001098537.2	375775	CHM13 CA Conservative 2.5% Error	LBLQ01008674.1	139465	181344	-	99.93	61.93
NM_001098537.2	375775	CHM13 CA Conservative 2.5% Error	LBLQ01001421.1	666383	711315	+	100	34.97
NM_001017975.4	164045	CHM13 CA Conservative 2.5% Error	LBLQ01000310.1	5462395	5563861	+	99.41	72.25
NM_001017975.4	164045	CHM13 CA Conservative 2.5% Error	LBLQ01008422.1	25262	41565	+	99.79	29.38
NM_001291821.1	445571	CHM13 CA Conservative 2.5% Error	LBLQ01002765.1	900	42381	-	99.91	68.91
NM_001291821.1	445571	CHM13 CA Conservative 2.5% Error	LBLQ01002552.1	1632	18633	-	97.71	34.03
NM_201453.3	445571	CHM13 CA Conservative 2.5% Error	LBLQ01002765.1	900	43985	-	99.83	69.93
NM_201453.3	445571	CHM13 CA Conservative 2.5% Error	LBLQ01002552.1	1632	18633	-	97.92	36.33
NM_001145440.2	441250	CHM13 CA Conservative 2.5% Error	LBLQ01000910.1	1445395	1584670	-	100	57.2
NM_001145440.2	441250	CHM13 CA Conservative 2.5% Error	LBLQ01000914.1	4443	35817	-	99.9	31.69
NM_032351.5	84311	CHM13 CA Conservative 2.5% Error	LBLQ01005118.1	6876	23492	+	99.91	69.32
NM_032351.5	84311	CHM13 CA Conservative 2.5% Error	LBLQ01000498.1	2353	11976	+	99.04	36.41
NM_001278279.2	84311	CHM13 CA Conservative 2.5% Error	LBLQ01005118.1	6876	23492	+	99.9	66.36
NM_001278279.2	84311	CHM13 CA Conservative 2.5% Error	LBLQ01000498.1	2353	11976	+	99.04	39.88
NM_000842.4	2915	CHM13 CA Conservative 2.5% Error	LBLQ01000751.1	860083	1205761	-	99.94	86.77
NM_000842.4	2915	CHM13 CA Conservative 2.5% Error	LBLQ01008406.1	55013	278371	-	97.86	16.45
NM_001292009.1	346007	CHM13 CA Conservative 2.5% Error	LBLQ01001067.1	2286816	3869448	-	99.96	78.39
NM_001292009.1	346007	CHM13 CA Conservative 2.5% Error	LBLQ01001069.1	24721	394682	-	100	21.62
NM_015570.3	26053	CHM13 CA Conservative 2.5% Error	LBLQ01000909.1	514095	608610	+	99.92	78.36
NM_015570.3	26053	CHM13 CA Conservative 2.5% Error	LBLQ01000980.1	58926	594684	-	100	21.12
NM_001127231.2	26053	CHM13 CA Conservative 2.5% Error	LBLQ01000909.1	514095	608610	+	99.92	78.12
NM_001127231.2	26053	CHM13 CA Conservative 2.5% Error	LBLQ01000980.1	58926	594684	-	100	21.35
NM_001127232.2	26053	CHM13 CA Conservative 2.5% Error	LBLQ01000980.1	75264	594684	-	100	74.42
NM_001127232.2	26053	CHM13 CA Conservative 2.5% Error	LBLQ01000909.1	105116	105534	+	100	23.09
NM_182543.3	221078	CHM13 CA Conservative 2.5% Error	LBLQ01000839.1	17227733	17293463	+	99.85	52.8
NM_182543.3	221078	CHM13 CA Conservative 2.5% Error	LBLQ01001868.1	2627865	2634650	-	99.26	47.31
NM_001300738.1	154215	CHM13 CA Conservative 2.5% Error	LBLQ01000668.1	20776	28030	+	99.84	73.49
NM_001300738.1	154215	CHM13 CA Conservative 2.5% Error	LBLQ01001447.1	50345	537988	-	98.61	16.81
NM_001300738.1	154215	CHM13 CA Conservative 2.5% Error	LBLQ01001446.1	14013	450745	-	99.44	10.59
NM_001300740.1	154215	CHM13 CA Conservative 2.5% Error	LBLQ01000668.1	1675	28030	+	99.18	84.88
NM_001300740.1	154215	CHM13 CA Conservative 2.5% Error	LBLQ01001446.1	14013	450745	-	99.42	11.44
NM_001300737.1	154215	CHM13 CA Conservative 2.5% Error	LBLQ01000668.1	1675	28030	+	99.18	74.42
NM_001300737.1	154215	CHM13 CA Conservative 2.5% Error	LBLQ01001447.1	59112	537988	-	99.83	17.67
NM_001300737.1	154215	CHM13 CA Conservative 2.5% Error	LBLQ01001446.1	14013	450745	-	99.42	10.03
NM_001040214.2	154215	CHM13 CA Conservative 2.5% Error	LBLQ01000668.1	1675	28030	+	99.18	75.83
NM_001040214.2	154215	CHM13 CA Conservative 2.5% Error	LBLQ01001447.1	59112	537988	-	99.81	16.12
NM_001040214.2	154215	CHM13 CA Conservative 2.5% Error	LBLQ01001446.1	14013	450745	-	99.42	10.22
NM_153355.4	154215	CHM13 CA Conservative 2.5% Error	LBLQ01000668.1	17209	28030	+	99.52	79.73
NM_153355.4	154215	CHM13 CA Conservative 2.5% Error	LBLQ01001447.1	59112	537988	-	99.81	17.13
NM_001029998.4	84068	CHM13 CA Conservative 2.5% Error	LBLQ01000023.1	4873974	4933776	-	99.38	81.48
NM_001029998.4	84068	CHM13 CA Conservative 2.5% Error	LBLQ01002829.1	1757	217791	-	100	21.36
NM_001300842.1	84068	CHM13 CA Conservative 2.5% Error	LBLQ01000023.1	4873974	4933776	-	99.4	82.01
NM_001300842.1	84068	CHM13 CA Conservative 2.5% Error	LBLQ01002829.1	1757	217791	-	100	20.75
NM_001300940.1	144577	CHM13 CA Conservative 2.5% Error	LBLQ01007240.1	7315	15664	+	100	78.85
NM_001300940.1	144577	CHM13 CA Conservative 2.5% Error	LBLQ01000252.1	8760	26622	-	96.97	24.14
NM_001300941.1	144577	CHM13 CA Conservative 2.5% Error	LBLQ01007240.1	7311	9336	+	99.9	82.99
NM_001300941.1	144577	CHM13 CA Conservative 2.5% Error	LBLQ01000252.1	1006	26622	-	94.51	21.98
NM_015326.4	23380	CHM13 CA Conservative 2.5% Error	LBLQ01002296.1	5470	54018	+	99.79	71.9
NM_015326.4	23380	CHM13 CA Conservative 2.5% Error	LBLQ01002295.1	2003	25343	+	95.68	14.98
NM_015326.4	23380	CHM13 CA Conservative 2.5% Error	LBLQ01002292.1	35592	106870	+	98.39	10.98
NM_001170637.3	23380	CHM13 CA Conservative 2.5% Error	LBLQ01002296.1	5470	54018	+	99.79	71.93
NM_001170637.3	23380	CHM13 CA Conservative 2.5% Error	LBLQ01002295.1	2003	25343	+	95.67	14.94
NM_001170637.3	23380	CHM13 CA Conservative 2.5% Error	LBLQ01002292.1	35592	106870	+	98.39	10.98
NM_001300952.1	23380	CHM13 CA Conservative 2.5% Error	LBLQ01002296.1	5470	45744	+	100	61.46
NM_001300952.1	23380	CHM13 CA Conservative 2.5% Error	LBLQ01002295.1	2003	25343	+	95.67	20.6
NM_001300952.1	23380	CHM13 CA Conservative 2.5% Error	LBLQ01002292.1	35592	106870	+	98.39	15.14
NM_024848.2	79906	CHM13 CA Conservative 2.5% Error	LBLQ01008202.1	10332	65604	-	100	79.06
NM_024848.2	79906	CHM13 CA Conservative 2.5% Error	LBLQ01000825.1	623361	623687	-	99.69	17.75
NM_000769.2	1557	CHM13 CA Conservative 2.5% Error	LBLQ01008883.1	7277995	7335965	+	99.89	54.8
NM_000769.2	1557	CHM13 CA Conservative 2.5% Error	LBLQ01009815.1	296159	328858	-	99.89	52.93
NM_032167.4	92017	CHM13 CA Conservative 2.5% Error	LBLQ01002114.1	402	529252	+	99.46	93.82
NM_032167.4	92017	CHM13 CA Conservative 2.5% Error	LBLQ01002113.1	849291	919026	+	100	7.01
NM_001301685.1	130940	CHM13 CA Conservative 2.5% Error	LBLQ01003137.1	5342218	5348958	-	99.21	63.17
NM_001301685.1	130940	CHM13 CA Conservative 2.5% Error	LBLQ01001468.1	672	99026	-	99.14	38
NM_001301684.1	130940	CHM13 CA Conservative 2.5% Error	LBLQ01003137.1	5174996	5344319	-	99.67	82.62
NM_001301684.1	130940	CHM13 CA Conservative 2.5% Error	LBLQ01001468.1	677	99026	-	99.35	17.79
NM_001302371.1	100132406	CHM13 CA Conservative 2.5% Error	LBLQ01000690.1	156	33458	-	97.73	45.4
NM_001302371.1	100132406	CHM13 CA Conservative 2.5% Error	LBLQ01000697.1	465	20119	-	95.36	21.49
NM_138796.3	128153	CHM13 CA Conservative 2.5% Error	LBLQ01000884.1	44738	170642	+	99.67	80.55
NM_138796.3	128153	CHM13 CA Conservative 2.5% Error	LBLQ01000330.1	6635969	6688011	+	99.34	19.91
NM_152888.2	169044	CHM13 CA Conservative 2.5% Error	LBLQ01004422.1	282	128656	+	99.94	54.04
NM_152888.2	169044	CHM13 CA Conservative 2.5% Error	LBLQ01004421.1	855971	1054972	+	99.83	46.88
NM_199340.3	374819	CHM13 CA Conservative 2.5% Error	LBLQ01001763.1	18170	39496	-	98.69	41.63
NM_199340.3	374819	CHM13 CA Conservative 2.5% Error	LBLQ01001767.1	9273	21710	-	98.69	58.74
NM_001303279.1	4642	CHM13 CA Conservative 2.5% Error	LBLQ01000370.1	11012	196381	-	99.47	70.28
NM_001303279.1	4642	CHM13 CA Conservative 2.5% Error	LBLQ01001882.1	25770	90926	+	100	31.6
NM_014695.2	9720	CHM13 CA Conservative 2.5% Error	LBLQ01001982.1	6834	61336	-	99.3	69.24
NM_014695.2	9720	CHM13 CA Conservative 2.5% Error	LBLQ01001776.1	10239	32144	+	99.27	30.7
NM_015194.2	4642	CHM13 CA Conservative 2.5% Error	LBLQ01000370.1	31163	196381	-	99.95	43.35
NM_015194.2	4642	CHM13 CA Conservative 2.5% Error	LBLQ01001882.1	25770	192907	+	100	56.48
NM_031481.2	83733	CHM13 CA Conservative 2.5% Error	LBLQ01002466.1	297	4052	+	100	55.79
NM_031481.2	83733	CHM13 CA Conservative 2.5% Error	LBLQ01007239.1	102	18083	-	99.59	34.57
NM_001303484.1	83733	CHM13 CA Conservative 2.5% Error	LBLQ01002466.1	297	4052	+	100	57.48
NM_001303484.1	83733	CHM13 CA Conservative 2.5% Error	LBLQ01007239.1	102	18083	-	99.56	32.59
NM_003631.3	8505	CHM13 CA Conservative 2.5% Error	LBLQ01001541.1	105771	203554	-	99.95	54.3
NM_003631.3	8505	CHM13 CA Conservative 2.5% Error	LBLQ01001518.1	5267	15203	-	99.65	40.77
NM_001303486.1	8505	CHM13 CA Conservative 2.5% Error	LBLQ01001541.1	105771	203554	-	99.95	60.34
NM_001303486.1	8505	CHM13 CA Conservative 2.5% Error	LBLQ01001518.1	5267	15203	-	99.54	34.21
NM_001303487.1	8505	CHM13 CA Conservative 2.5% Error	LBLQ01001541.1	105771	203554	-	99.95	55.16
NM_001303487.1	8505	CHM13 CA Conservative 2.5% Error	LBLQ01001518.1	5267	15203	-	99.64	39.83
NM_001303489.1	8505	CHM13 CA Conservative 2.5% Error	LBLQ01001541.1	105883	203553	-	99.95	75.33
NM_001303489.1	8505	CHM13 CA Conservative 2.5% Error	LBLQ01001518.1	6651	15203	-	98.23	19.12
NM_000868.3	3358	CHM13 CA Conservative 2.5% Error	LBLQ01000588.1	19401	202794	+	99.97	86.33
NM_000868.3	3358	CHM13 CA Conservative 2.5% Error	LBLQ01000586.1	2212458	2242268	+	100	13.59
NM_001256760.2	3358	CHM13 CA Conservative 2.5% Error	LBLQ01000588.1	10129	202794	+	99.97	86.59
NM_001256760.2	3358	CHM13 CA Conservative 2.5% Error	LBLQ01000586.1	2212458	2242270	+	100	13.38
NM_001256761.2	3358	CHM13 CA Conservative 2.5% Error	LBLQ01000588.1	19401	202794	+	99.97	86.06
NM_001256761.2	3358	CHM13 CA Conservative 2.5% Error	LBLQ01000586.1	2212458	2242268	+	100	13.87
NM_001304535.1	284521	CHM13 CA Conservative 2.5% Error	LBLQ01000896.1	23184	24748	+	99.93	81.46
NM_001304535.1	284521	CHM13 CA Conservative 2.5% Error	LBLQ01000894.1	4754497	4781241	+	97.02	20.82
NM_175911.3	284521	CHM13 CA Conservative 2.5% Error	LBLQ01000896.1	22477	24748	+	99.94	82.6
NM_175911.3	284521	CHM13 CA Conservative 2.5% Error	LBLQ01000894.1	4754497	4781241	+	97.02	19.55
NM_001304523.1	8379	CHM13 CA Conservative 2.5% Error	LBLQ01001123.1	630031	829335	-	99.91	48.33
NM_001304523.1	8379	CHM13 CA Conservative 2.5% Error	LBLQ01001125.1	34232	197801	-	99.92	51.45
NM_001304524.1	8379	CHM13 CA Conservative 2.5% Error	LBLQ01001123.1	630031	829335	-	99.91	51.65
NM_001304524.1	8379	CHM13 CA Conservative 2.5% Error	LBLQ01001125.1	34232	197801	-	99.91	48.14
NM_003628.4	8502	CHM13 CA Conservative 2.5% Error	LBLQ01008401.1	15612378	15760677	-	99.77	93.11
NM_003628.4	8502	CHM13 CA Conservative 2.5% Error	LBLQ01001468.1	99153	99492	+	100	7.24
NM_001005476.2	8502	CHM13 CA Conservative 2.5% Error	LBLQ01008401.1	15612378	15760677	-	99.76	92.91
NM_001005476.2	8502	CHM13 CA Conservative 2.5% Error	LBLQ01001468.1	99153	99492	+	100	7.45
NM_001304969.1	8502	CHM13 CA Conservative 2.5% Error	LBLQ01008401.1	15612378	15760677	-	99.77	93.1
NM_001304969.1	8502	CHM13 CA Conservative 2.5% Error	LBLQ01001468.1	99153	99492	+	100	7.25
NM_001304970.1	8502	CHM13 CA Conservative 2.5% Error	LBLQ01008401.1	15612378	15760677	-	99.76	92.99
NM_001304970.1	8502	CHM13 CA Conservative 2.5% Error	LBLQ01001468.1	99153	108943	+	97.19	8.43
NM_001304971.1	8502	CHM13 CA Conservative 2.5% Error	LBLQ01008401.1	15627149	15760677	-	99.64	89.83
NM_001304971.1	8502	CHM13 CA Conservative 2.5% Error	LBLQ01001468.1	99153	99492	+	100	10.67
NM_033273.2	90827	CHM13 CA Conservative 2.5% Error	LBLQ01003209.1	45619	52729	-	99.82	85.08
NM_033273.2	90827	CHM13 CA Conservative 2.5% Error	LBLQ01003212.1	2681	10249	-	99.67	15
NM_006661.3	10846	CHM13 CA Conservative 2.5% Error	LBLQ01002084.1	4492926	4509144	-	100	73.6
NM_006661.3	10846	CHM13 CA Conservative 2.5% Error	LBLQ01002085.1	3175	286647	-	100	26.43
NM_001306090.1	2121	CHM13 CA Conservative 2.5% Error	LBLQ01002819.1	3130293	3161062	-	99.87	73.11
NM_001306090.1	2121	CHM13 CA Conservative 2.5% Error	LBLQ01008874.1	1499005	1544180	+	99.71	27.19
NM_001306084.1	144535	CHM13 CA Conservative 2.5% Error	LBLQ01008573.1	15430193	15662878	+	99.81	70.23
NM_001306084.1	144535	CHM13 CA Conservative 2.5% Error	LBLQ01008575.1	13678	149023	+	99.85	28.39
NM_001308117.1	54715	CHM13 CA Conservative 2.5% Error	LBLQ01008876.1	91262	750459	+	100	81.71
NM_001308117.1	54715	CHM13 CA Conservative 2.5% Error	LBLQ01005138.1	755684	1390872	+	100	18.52
NM_001308196.1	375484	CHM13 CA Conservative 2.5% Error	LBLQ01005673.1	10497	67604	+	100	86.48
NM_001308196.1	375484	CHM13 CA Conservative 2.5% Error	LBLQ01001428.1	156186	181330	+	95.53	14.58
NM_198567.5	375484	CHM13 CA Conservative 2.5% Error	LBLQ01005673.1	15882	67604	+	100	86.52
NM_198567.5	375484	CHM13 CA Conservative 2.5% Error	LBLQ01001428.1	156186	156465	+	99.64	13.4
NM_001308195.1	375484	CHM13 CA Conservative 2.5% Error	LBLQ01005673.1	10500	67604	+	100	91.72
NM_001308195.1	375484	CHM13 CA Conservative 2.5% Error	LBLQ01001428.1	156186	156466	+	99.64	8.27
NM_002847.4	5799	CHM13 CA Conservative 2.5% Error	LBLQ01001950.1	625821	1420895	-	99.91	93.9
NM_002847.4	5799	CHM13 CA Conservative 2.5% Error	LBLQ01001951.1	86102	185889	-	98.7	6.29
NM_130842.3	5799	CHM13 CA Conservative 2.5% Error	LBLQ01001950.1	625821	1420894	-	99.91	94.88
NM_130842.3	5799	CHM13 CA Conservative 2.5% Error	LBLQ01001951.1	180417	185889	-	91.88	6.15
NM_130843.3	5799	CHM13 CA Conservative 2.5% Error	LBLQ01001950.1	625821	1420895	-	99.91	93.79
NM_130843.3	5799	CHM13 CA Conservative 2.5% Error	LBLQ01001951.1	86102	185889	-	98.7	6.41
NM_001308267.1	5799	CHM13 CA Conservative 2.5% Error	LBLQ01001950.1	625821	1309379	-	99.9	93.76
NM_001308267.1	5799	CHM13 CA Conservative 2.5% Error	LBLQ01001951.1	86110	185889	-	100	6.28
NM_001308268.1	5799	CHM13 CA Conservative 2.5% Error	LBLQ01001950.1	625821	1420894	-	99.91	91.87
NM_001308268.1	5799	CHM13 CA Conservative 2.5% Error	LBLQ01001951.1	86102	139861	-	99.03	8.29
NM_001310148.1	440345	CHM13 CA Conservative 2.5% Error	LBLQ01004026.1	12418	25124	-	99.07	84.83
NM_001310148.1	440345	CHM13 CA Conservative 2.5% Error	LBLQ01001017.1	5146	5645	-	100	8.57
NM_001310154.1	400986	CHM13 CA Conservative 2.5% Error	LBLQ01003444.1	2029	70808	+	99.24	41.04
NM_001310154.1	400986	CHM13 CA Conservative 2.5% Error	LBLQ01001930.1	15673	63406	+	94.22	42.71
NM_001310154.1	400986	CHM13 CA Conservative 2.5% Error	LBLQ01010139.1	46395	78226	+	99.87	19.11
NM_031418.3	63982	CHM13 CA Conservative 2.5% Error	LBLQ01000584.1	5002	217004	+	99.62	93.51
NM_031418.3	63982	CHM13 CA Conservative 2.5% Error	LBLQ01000583.1	833313	945046	+	99.78	7.7
NM_001313726.1	63982	CHM13 CA Conservative 2.5% Error	LBLQ01000584.1	17050	217004	+	99.79	91.02
NM_001313726.1	63982	CHM13 CA Conservative 2.5% Error	LBLQ01000583.1	690307	945046	+	99.81	9.11
NM_016529.5	51761	CHM13 CA Conservative 2.5% Error	LBLQ01001146.1	4251961	4316235	-	99.79	64.87
NM_016529.5	51761	CHM13 CA Conservative 2.5% Error	LBLQ01001147.1	40050	534700	-	99.85	35.18
NM_001313741.1	51761	CHM13 CA Conservative 2.5% Error	LBLQ01001146.1	4251961	4327991	-	99.61	67.46
NM_001313741.1	51761	CHM13 CA Conservative 2.5% Error	LBLQ01001147.1	40050	437701	-	99.83	33.2
NM_002412.4	4255	CHM13 CA Conservative 2.5% Error	LBLQ01000827.1	18882	27329	+	98.89	72.52
NM_002412.4	4255	CHM13 CA Conservative 2.5% Error	LBLQ01002349.1	1004205	1247001	+	97.42	30.61
NR_002473.2	440354	CHM13 CA Conservative 2.5% Error	LBLQ01000326.1	12956	43641	-	99.38	87.5
NR_002473.2	440354	CHM13 CA Conservative 2.5% Error	LBLQ01002141.1	9090	15457	+	94.61	13
NR_002453.4	595101	CHM13 CA Conservative 2.5% Error	LBLQ01000326.1	12956	43641	-	99.44	78.81
NR_002453.4	595101	CHM13 CA Conservative 2.5% Error	LBLQ01002143.1	952494	982823	+	99.86	16.74
NR_002793.1	220115	CHM13 CA Conservative 2.5% Error	LBLQ01001580.1	2263	34381	+	99.82	43.54
NR_002793.1	220115	CHM13 CA Conservative 2.5% Error	LBLQ01001202.1	2286	57961	-	98.56	34.55
NR_002793.1	220115	CHM13 CA Conservative 2.5% Error	LBLQ01004024.1	19121	29223	-	98.85	19.98
NR_002894.1	84278	CHM13 CA Conservative 2.5% Error	LBLQ01002895.1	13127	13448	+	100	40.14
NR_002894.1	84278	CHM13 CA Conservative 2.5% Error	LBLQ01002103.1	1088	25247	+	97.12	52.41
NR_003149.1	84059	CHM13 CA Conservative 2.5% Error	LBLQ01000257.1	5902	276155	-	99.98	86.36
NR_003149.1	84059	CHM13 CA Conservative 2.5% Error	LBLQ01001047.1	991	341820	+	99.9	15.81
NR_003610.1	283970	CHM13 CA Conservative 2.5% Error	LBLQ01000452.1	2840	4657	+	99.63	39.79
NR_003610.1	283970	CHM13 CA Conservative 2.5% Error	LBLQ01002241.1	26131	70054	+	98.37	29.94
NR_003610.1	283970	CHM13 CA Conservative 2.5% Error	LBLQ01000418.1	2588	16764	-	96.81	22.03
NR_015367.2	550643	CHM13 CA Conservative 2.5% Error	LBLQ01001050.1	50463	53378	-	100	61.21
NR_015367.2	550643	CHM13 CA Conservative 2.5% Error	LBLQ01001048.1	817672	831116	-	94.37	46.1
NR_023380.1	348254	CHM13 CA Conservative 2.5% Error	LBLQ01001777.1	1637	80308	+	99.81	88.46
NR_023380.1	348254	CHM13 CA Conservative 2.5% Error	LBLQ01002224.1	430804	433569	+	96.22	13.13
NR_023383.1	441263	CHM13 CA Conservative 2.5% Error	LBLQ01000798.1	8950	42947	-	98.8	75.26
NR_023383.1	441263	CHM13 CA Conservative 2.5% Error	LBLQ01000302.1	2040	15727	-	97.96	32.77
NR_003369.2	653390	CHM13 CA Conservative 2.5% Error	LBLQ01001649.1	187599	213681	-	99.87	64.37
NR_003369.2	653390	CHM13 CA Conservative 2.5% Error	LBLQ01004054.1	15140	30338	+	98.02	39.71
NR_024241.1	692099	CHM13 CA Conservative 2.5% Error	LBLQ01009730.1	2	6053	+	97.6	72.18
NR_024241.1	692099	CHM13 CA Conservative 2.5% Error	LBLQ01010017.1	877	6842	-	96.64	17.57
NR_015416.1	727924	CHM13 CA Conservative 2.5% Error	LBLQ01003982.1	2444	26827	+	99.1	48.68
NR_015416.1	727924	CHM13 CA Conservative 2.5% Error	LBLQ01002054.1	1170	10085	+	99.62	15.95
NR_024397.1	728190	CHM13 CA Conservative 2.5% Error	LBLQ01000965.1	21841	41414	+	97.42	60.84
NR_024397.1	728190	CHM13 CA Conservative 2.5% Error	LBLQ01005632.1	27480	77356	+	95.46	43.91
NR_024448.2	91316	CHM13 CA Conservative 2.5% Error	LBLQ01002914.1	4474177	4507874	+	99.82	82.01
NR_024448.2	91316	CHM13 CA Conservative 2.5% Error	LBLQ01005690.1	3131	24650	+	99.66	17.41
NR_026879.1	222234	CHM13 CA Conservative 2.5% Error	LBLQ01000992.1	20353	21288	+	100	46.4
NR_026879.1	222234	CHM13 CA Conservative 2.5% Error	LBLQ01000989.1	36360	45357	+	100	32.6
NR_026879.1	222234	CHM13 CA Conservative 2.5% Error	LBLQ01001505.1	1635	16692	+	99.63	13.38
NR_026916.1	149992	CHM13 CA Conservative 2.5% Error	LBLQ01004092.1	32849	64336	+	98.84	87.37
NR_026916.1	149992	CHM13 CA Conservative 2.5% Error	LBLQ01009859.1	4293	21519	+	95.35	16.93
NR_026921.1	202181	CHM13 CA Conservative 2.5% Error	LBLQ01005667.1	35803	50032	+	99.88	91
NR_026921.1	202181	CHM13 CA Conservative 2.5% Error	LBLQ01001440.1	2673	2930	+	99.22	9.03
NR_026999.1	349114	CHM13 CA Conservative 2.5% Error	LBLQ01002433.1	1429833	1450315	-	95.31	80.84
NR_026999.1	349114	CHM13 CA Conservative 2.5% Error	LBLQ01000997.1	3192102	3229611	+	100	17.86
NR_003660.2	106660613	CHM13 CA Conservative 2.5% Error	LBLQ01003415.1	5428	15843	+	99.79	63.11
NR_003660.2	106660613	CHM13 CA Conservative 2.5% Error	LBLQ01003003.1	27978	30397	-	100	36.88
NR_027154.1	641298	CHM13 CA Conservative 2.5% Error	LBLQ01000326.1	12523	43641	-	98.1	79.9
NR_027154.1	641298	CHM13 CA Conservative 2.5% Error	LBLQ01002143.1	952452	982823	+	91.54	15.2
NR_027269.1	285961	CHM13 CA Conservative 2.5% Error	LBLQ01002253.1	1950	13963	-	99.79	72.47
NR_027269.1	285961	CHM13 CA Conservative 2.5% Error	LBLQ01001495.1	34302	34495	-	97.93	28.86
NR_027270.1	391267	CHM13 CA Conservative 2.5% Error	LBLQ01001639.1	24454	25196	+	100	67.85
NR_027270.1	391267	CHM13 CA Conservative 2.5% Error	LBLQ01008441.1	5444	15860	-	97.45	32.32
NR_027242.1	146336	CHM13 CA Conservative 2.5% Error	LBLQ01003197.1	194672	200041	-	99.46	88.27
NR_027242.1	146336	CHM13 CA Conservative 2.5% Error	LBLQ01001980.1	660	4099	-	98.21	13.19
NR_027311.1	153910	CHM13 CA Conservative 2.5% Error	LBLQ01007862.1	57510	59456	+	99.69	84.89
NR_027311.1	153910	CHM13 CA Conservative 2.5% Error	LBLQ01007860.1	15188136	15229667	+	100	15.76
NR_027424.1	100132103	CHM13 CA Conservative 2.5% Error	LBLQ01002868.1	8055	31206	-	96.07	63.59
NR_027424.1	100132103	CHM13 CA Conservative 2.5% Error	LBLQ01007781.1	14041	14603	+	99.82	39.26
NR_027425.1	100132923	CHM13 CA Conservative 2.5% Error	LBLQ01002940.1	9132	15412	+	99.67	56.86
NR_027425.1	100132923	CHM13 CA Conservative 2.5% Error	LBLQ01004391.1	3362	32553	+	100	49.67
NR_027768.1	349152	CHM13 CA Conservative 2.5% Error	LBLQ01007865.1	4378	23561	+	94.75	7.79
NR_027768.1	349152	CHM13 CA Conservative 2.5% Error	LBLQ01001184.1	1800795	1823635	+	99.35	56.86
NR_027768.1	349152	CHM13 CA Conservative 2.5% Error	LBLQ01000993.1	1594	25808	-	98.05	12.97
NR_003561.2	349152	CHM13 CA Conservative 2.5% Error	LBLQ01001184.1	1800949	1823694	+	97.92	64.51
NR_003561.2	349152	CHM13 CA Conservative 2.5% Error	LBLQ01000993.1	163	28210	-	97.13	15.94
NR_027774.1	9842	CHM13 CA Conservative 2.5% Error	LBLQ01002026.1	5242	27805	+	99.73	76.04
NR_027774.1	9842	CHM13 CA Conservative 2.5% Error	LBLQ01002024.1	14860	37169	+	99.1	24.28
NR_027782.1	9842	CHM13 CA Conservative 2.5% Error	LBLQ01002026.1	5256	27805	+	99.94	77.85
NR_027782.1	9842	CHM13 CA Conservative 2.5% Error	LBLQ01002024.1	14860	36372	+	98.38	22.6
NR_027995.1	284232	CHM13 CA Conservative 2.5% Error	LBLQ01007257.1	1	18125	-	97.44	47.91
NR_027995.1	284232	CHM13 CA Conservative 2.5% Error	LBLQ01010429.1	1	16759	+	96.74	40.7
NR_028063.1	9648	CHM13 CA Conservative 2.5% Error	LBLQ01001743.1	5472	56072	-	99.94	73.2
NR_028063.1	9648	CHM13 CA Conservative 2.5% Error	LBLQ01001741.1	156758	166607	-	99.02	29.58
NR_026775.2	100133205	CHM13 CA Conservative 2.5% Error	LBLQ01000527.1	47564	48286	+	100	74
NR_026775.2	100133205	CHM13 CA Conservative 2.5% Error	LBLQ01000524.1	11959	23473	+	97.69	26.24
NR_027020.2	554226	CHM13 CA Conservative 2.5% Error	LBLQ01004092.1	8305	47443	+	98.13	71.29
NR_027020.2	554226	CHM13 CA Conservative 2.5% Error	LBLQ01008997.1	69227	69668	-	100	30.75
NR_029401.1	731275	CHM13 CA Conservative 2.5% Error	LBLQ01001416.1	2797	38971	-	97.51	62.62
NR_029401.1	731275	CHM13 CA Conservative 2.5% Error	LBLQ01001457.1	6411442	6415676	-	98.27	34.84
NR_029411.1	100133091	CHM13 CA Conservative 2.5% Error	LBLQ01000484.1	3706	40107	+	99.14	78.1
NR_029411.1	100133091	CHM13 CA Conservative 2.5% Error	LBLQ01000982.1	12925	19622	+	96.13	24.66
NR_029426.1	11039	CHM13 CA Conservative 2.5% Error	LBLQ01002597.1	513	23504	-	96.8	39.93
NR_029426.1	11039	CHM13 CA Conservative 2.5% Error	LBLQ01000506.1	563	4149	+	99.79	50.33
NR_027423.1	100128890	CHM13 CA Conservative 2.5% Error	LBLQ01002868.1	8055	31206	-	96.07	63.61
NR_027423.1	100128890	CHM13 CA Conservative 2.5% Error	LBLQ01009941.1	10062	16639	+	95.79	41.27
NR_027028.2	728411	CHM13 CA Conservative 2.5% Error	LBLQ01002598.1	11564	17438	-	99.77	63.86
NR_027028.2	728411	CHM13 CA Conservative 2.5% Error	LBLQ01002176.1	3186186	3188588	-	96.13	36.41
NR_033645.1	64788	CHM13 CA Conservative 2.5% Error	LBLQ01003196.1	94527	115533	-	99.76	62.37
NR_033645.1	64788	CHM13 CA Conservative 2.5% Error	LBLQ01003197.1	1	111046	-	98.89	45.65
NR_033646.1	64788	CHM13 CA Conservative 2.5% Error	LBLQ01003196.1	94527	115533	-	99.76	58.56
NR_033646.1	64788	CHM13 CA Conservative 2.5% Error	LBLQ01003197.1	1	100691	-	99.09	48.95
NR_033856.1	644316	CHM13 CA Conservative 2.5% Error	LBLQ01004357.1	17987	25134	+	99.77	69.49
NR_033856.1	644316	CHM13 CA Conservative 2.5% Error	LBLQ01008859.1	24428	31789	+	98.47	18
NR_033898.1	285577	CHM13 CA Conservative 2.5% Error	LBLQ01001971.1	16180	21603	+	99.67	85.68
NR_033898.1	285577	CHM13 CA Conservative 2.5% Error	LBLQ01001425.1	3703926	3708270	+	99.56	14.37
NR_033942.1	728377	CHM13 CA Conservative 2.5% Error	LBLQ01002490.1	412772	426329	+	99.85	84.87
NR_033942.1	728377	CHM13 CA Conservative 2.5% Error	LBLQ01001001.1	465716	486006	-	97.77	17.07
NR_036432.1	283755	CHM13 CA Conservative 2.5% Error	LBLQ01001809.1	33905	68984	-	98.6	87.81
NR_036432.1	283755	CHM13 CA Conservative 2.5% Error	LBLQ01003982.1	238280	266804	+	95.9	9.51
NR_036447.1	339044	CHM13 CA Conservative 2.5% Error	LBLQ01002344.1	2838	32437	+	99.61	91.16
NR_036447.1	339044	CHM13 CA Conservative 2.5% Error	LBLQ01002241.1	1314	3169	+	99.19	7.87
NR_036541.1	653519	CHM13 CA Conservative 2.5% Error	LBLQ01000678.1	570	23853	+	99.79	49.34
NR_036541.1	653519	CHM13 CA Conservative 2.5% Error	LBLQ01000677.1	2715	25757	+	99.72	36.37
NR_036647.1	284047	CHM13 CA Conservative 2.5% Error	LBLQ01001777.1	1637	84554	+	98.91	93.92
NR_036647.1	284047	CHM13 CA Conservative 2.5% Error	LBLQ01002086.1	1190193	1190706	+	97.85	5.89
NR_027145.2	100271835	CHM13 CA Conservative 2.5% Error	LBLQ01002081.1	261233	296731	+	99.73	58.06
NR_027145.2	100271835	CHM13 CA Conservative 2.5% Error	LBLQ01001740.1	1	25975	-	99.62	40.85
NR_037597.1	442028	CHM13 CA Conservative 2.5% Error	LBLQ01002904.1	4589	17346	+	99.95	70.45
NR_037597.1	442028	CHM13 CA Conservative 2.5% Error	LBLQ01002902.1	477021	531834	+	99.73	22.52
NR_037599.1	646278	CHM13 CA Conservative 2.5% Error	LBLQ01002859.1	3	39660	-	97.63	64.23
NR_037599.1	646278	CHM13 CA Conservative 2.5% Error	LBLQ01001793.1	1250158	1268032	-	99.7	32.47
NR_037599.1	646278	CHM13 CA Conservative 2.5% Error	LBLQ01002687.1	29197	31362	+	100	12.38
NR_027155.2	100271836	CHM13 CA Conservative 2.5% Error	LBLQ01000326.1	12523	43641	-	97.5	79.23
NR_027155.2	100271836	CHM13 CA Conservative 2.5% Error	LBLQ01002143.1	952449	982823	+	92.95	15.14
NR_037791.1	100529264	CHM13 CA Conservative 2.5% Error	LBLQ01006258.1	1101133	1109237	-	100	71.49
NR_037791.1	100529264	CHM13 CA Conservative 2.5% Error	LBLQ01004867.1	2045951	2054711	+	100	28.57
NR_037882.1	100533107	CHM13 CA Conservative 2.5% Error	LBLQ01005682.1	2748	38167	-	99.63	66.35
NR_037882.1	100533107	CHM13 CA Conservative 2.5% Error	LBLQ01008193.1	276452	280781	-	99.84	33.88
NR_037924.1	100533496	CHM13 CA Conservative 2.5% Error	LBLQ01001154.1	102558	106829	+	100	81.94
NR_037924.1	100533496	CHM13 CA Conservative 2.5% Error	LBLQ01001152.1	3083	34539	+	97.34	20.13
NR_038291.1	100507127	CHM13 CA Conservative 2.5% Error	LBLQ01001185.1	8174416	8183221	-	99.61	84.75
NR_038291.1	100507127	CHM13 CA Conservative 2.5% Error	LBLQ01001187.1	15599	23347	-	98.05	16.48
NR_038377.1	441058	CHM13 CA Conservative 2.5% Error	LBLQ01003410.1	8897	29006	-	100	57.49
NR_038377.1	441058	CHM13 CA Conservative 2.5% Error	LBLQ01002151.1	8238	19003	+	99.67	50.7
NR_038967.1	100630923	CHM13 CA Conservative 2.5% Error	LBLQ01000983.1	1207	62148	+	99.95	81.07
NR_038967.1	100630923	CHM13 CA Conservative 2.5% Error	LBLQ01000299.1	24051	26268	-	96.77	23.35
NR_040091.1	100506990	CHM13 CA Conservative 2.5% Error	LBLQ01004393.1	51069	98536	+	98.6	60.02
NR_040091.1	100506990	CHM13 CA Conservative 2.5% Error	LBLQ01004392.1	15713	26648	+	95.53	48.89
NR_040092.1	100506990	CHM13 CA Conservative 2.5% Error	LBLQ01004392.1	15713	23601	+	99.59	54.26
NR_040092.1	100506990	CHM13 CA Conservative 2.5% Error	LBLQ01004394.1	9849	27215	+	98.62	44.25
NR_040415.1	140849	CHM13 CA Conservative 2.5% Error	LBLQ01007778.1	325542	330221	+	99.61	72.33
NR_040415.1	140849	CHM13 CA Conservative 2.5% Error	LBLQ01002599.1	7099	7302	+	100	28.21
NR_024054.2	11039	CHM13 CA Conservative 2.5% Error	LBLQ01001406.1	16607	17605	-	97.66	33.46
NR_024054.2	11039	CHM13 CA Conservative 2.5% Error	LBLQ01002597.1	13006	23504	-	99.82	57.67
NR_002833.2	554236	CHM13 CA Conservative 2.5% Error	LBLQ01000994.1	4465	49592	-	99.93	51.5
NR_002833.2	554236	CHM13 CA Conservative 2.5% Error	LBLQ01000248.1	5089605	5153534	-	98.03	59.79
NR_046331.1	9024	CHM13 CA Conservative 2.5% Error	LBLQ01002998.1	543061	555967	-	99.65	61.53
NR_046331.1	9024	CHM13 CA Conservative 2.5% Error	LBLQ01002999.1	1783	65444	-	99.52	44.72
NR_047527.1	387628	CHM13 CA Conservative 2.5% Error	LBLQ01002657.1	7043	9686	+	99.93	69.97
NR_047527.1	387628	CHM13 CA Conservative 2.5% Error	LBLQ01001990.1	20583	21140	-	98.56	25.07
NR_003674.2	387628	CHM13 CA Conservative 2.5% Error	LBLQ01002657.1	7043	9686	+	99.93	73.61
NR_003674.2	387628	CHM13 CA Conservative 2.5% Error	LBLQ01001990.1	20564	21140	-	97.06	27.23
NR_047568.1	100505566	CHM13 CA Conservative 2.5% Error	LBLQ01000783.1	8926601	8927398	-	99	64.97
NR_047568.1	100505566	CHM13 CA Conservative 2.5% Error	LBLQ01008868.1	40867	228516	-	99.76	35.02
NR_048566.1	151242	CHM13 CA Conservative 2.5% Error	LBLQ01002803.1	43409	113335	+	99.45	86.68
NR_048566.1	151242	CHM13 CA Conservative 2.5% Error	LBLQ01001523.1	1163397	1163764	+	100	11.5
NR_048567.1	151242	CHM13 CA Conservative 2.5% Error	LBLQ01002803.1	43408	99719	+	98.77	59.41
NR_048567.1	151242	CHM13 CA Conservative 2.5% Error	LBLQ01001523.1	1131815	1180600	+	96.66	48.54
NR_051962.1	27130	CHM13 CA Conservative 2.5% Error	LBLQ01000286.1	5263220	5299446	-	99.95	55.46
NR_051962.1	27130	CHM13 CA Conservative 2.5% Error	LBLQ01002894.1	1876	157428	-	94.87	47.67
NR_027436.2	283788	CHM13 CA Conservative 2.5% Error	LBLQ01001206.1	14488	46615	-	99.42	84.95
NR_027436.2	283788	CHM13 CA Conservative 2.5% Error	LBLQ01009218.1	7766	19131	-	98.74	19.49
NR_047662.2	729732	CHM13 CA Conservative 2.5% Error	LBLQ01003061.1	20228	22218	-	99.34	49.94
NR_047662.2	729732	CHM13 CA Conservative 2.5% Error	LBLQ01007785.1	2523	16245	-	98.05	16.59
NR_047662.2	729732	CHM13 CA Conservative 2.5% Error	LBLQ01010000.1	3	27513	+	90.84	31.61
NR_073000.1	57180	CHM13 CA Conservative 2.5% Error	LBLQ01002425.1	850696	853954	-	99.73	52.61
NR_073000.1	57180	CHM13 CA Conservative 2.5% Error	LBLQ01001938.1	14373	67004	+	97.64	42.77
NR_073001.1	57180	CHM13 CA Conservative 2.5% Error	LBLQ01002425.1	850696	853954	-	99.73	54.34
NR_073001.1	57180	CHM13 CA Conservative 2.5% Error	LBLQ01001938.1	15453	67004	+	96.94	38.7
NR_073081.1	1397	CHM13 CA Conservative 2.5% Error	LBLQ01002600.1	20	1067	+	100	71.53
NR_073081.1	1397	CHM13 CA Conservative 2.5% Error	LBLQ01010131.1	5324128	5329950	+	99.11	21.27
NR_073084.1	1397	CHM13 CA Conservative 2.5% Error	LBLQ01002600.1	20	1067	+	100	37.22
NR_073084.1	1397	CHM13 CA Conservative 2.5% Error	LBLQ01010131.1	5325212	5329950	+	99.79	48.8
NR_073085.1	1397	CHM13 CA Conservative 2.5% Error	LBLQ01002600.1	20	1067	+	100	50.72
NR_073085.1	1397	CHM13 CA Conservative 2.5% Error	LBLQ01010131.1	5326599	5329950	+	99.33	30.43
NR_103473.1	55277	CHM13 CA Conservative 2.5% Error	LBLQ01000289.1	41685	298989	-	100	43.17
NR_103473.1	55277	CHM13 CA Conservative 2.5% Error	LBLQ01000287.1	3013283	3054760	-	98.69	46.03
NR_103473.1	55277	CHM13 CA Conservative 2.5% Error	LBLQ01000288.1	20041	50614	-	99.69	12.99
NR_103528.1	22862	CHM13 CA Conservative 2.5% Error	LBLQ01002796.1	3017157	3059694	-	100	79.02
NR_103528.1	22862	CHM13 CA Conservative 2.5% Error	LBLQ01000033.1	12579	181917	-	100	20.91
NR_103556.1	100288805	CHM13 CA Conservative 2.5% Error	LBLQ01002218.1	1623	100315	+	99.66	67.7
NR_103556.1	100288805	CHM13 CA Conservative 2.5% Error	LBLQ01001002.1	2887	147058	-	99.73	29.36
NR_033957.2	643650	CHM13 CA Conservative 2.5% Error	LBLQ01001966.1	46262	51165	+	99.35	86.52
NR_033957.2	643650	CHM13 CA Conservative 2.5% Error	LBLQ01001964.1	51288	51731	+	99.09	15.45
NR_026811.3	80154	CHM13 CA Conservative 2.5% Error	LBLQ01008829.1	16714	17842	+	96.3	19.71
NR_026811.3	80154	CHM13 CA Conservative 2.5% Error	LBLQ01003806.1	1669601	1669938	+	99.11	10.82
NR_104189.1	100873165	CHM13 CA Conservative 2.5% Error	LBLQ01001857.1	18833	21568	+	99.81	86.94
NR_104189.1	100873165	CHM13 CA Conservative 2.5% Error	LBLQ01008644.1	21724	25572	+	97.54	14.49
NR_104323.1	101669767	CHM13 CA Conservative 2.5% Error	LBLQ01001523.1	70945	94349	+	100	46.75
NR_104323.1	101669767	CHM13 CA Conservative 2.5% Error	LBLQ01000021.1	12131	147485	-	99.76	53.55
NR_104324.1	101669767	CHM13 CA Conservative 2.5% Error	LBLQ01001523.1	67310	94349	+	97.37	51.49
NR_104324.1	101669767	CHM13 CA Conservative 2.5% Error	LBLQ01000021.1	12110	147485	-	98.54	55.92
NR_104325.1	101669767	CHM13 CA Conservative 2.5% Error	LBLQ01001523.1	70945	94349	+	100	47.88
NR_104325.1	101669767	CHM13 CA Conservative 2.5% Error	LBLQ01000021.1	12131	147485	-	99.75	52.43
NR_104319.1	101669767	CHM13 CA Conservative 2.5% Error	LBLQ01001523.1	70945	94349	+	100	51.25
NR_104319.1	101669767	CHM13 CA Conservative 2.5% Error	LBLQ01000021.1	12131	147485	-	99.71	49.09
NR_104322.1	101669767	CHM13 CA Conservative 2.5% Error	LBLQ01001523.1	70945	94349	+	100	43.94
NR_104322.1	101669767	CHM13 CA Conservative 2.5% Error	LBLQ01000021.1	12131	147485	-	99.78	56.35
NR_104320.1	101669767	CHM13 CA Conservative 2.5% Error	LBLQ01001523.1	67310	94349	+	97.99	54.64
NR_104320.1	101669767	CHM13 CA Conservative 2.5% Error	LBLQ01000021.1	12110	147485	-	98.34	52.67
NR_104452.1	221322	CHM13 CA Conservative 2.5% Error	LBLQ01001447.1	3008180	3182676	+	99.35	53.51
NR_104452.1	221322	CHM13 CA Conservative 2.5% Error	LBLQ01000781.1	253931	335495	-	99.96	50.14
NR_108107.1	642633	CHM13 CA Conservative 2.5% Error	LBLQ01002353.1	1036	23046	-	98.07	93.46
NR_108107.1	642633	CHM13 CA Conservative 2.5% Error	LBLQ01002304.1	14149	17200	+	98.9	8.12
NR_109941.1	101929423	CHM13 CA Conservative 2.5% Error	LBLQ01000258.1	561097	561718	-	99.83	68.2
NR_109941.1	101929423	CHM13 CA Conservative 2.5% Error	LBLQ01000260.1	10413	32874	-	97.41	32.97
NR_109940.1	101929423	CHM13 CA Conservative 2.5% Error	LBLQ01000258.1	652116	652673	-	100	64.5
NR_109940.1	101929423	CHM13 CA Conservative 2.5% Error	LBLQ01000260.1	10430	26898	-	100	34.88
NR_109983.1	729218	CHM13 CA Conservative 2.5% Error	LBLQ01002365.1	11659	28703	-	99.9	87.93
NR_109983.1	729218	CHM13 CA Conservative 2.5% Error	LBLQ01000888.1	8685	25965	-	97.93	12.58
NR_024386.2	440456	CHM13 CA Conservative 2.5% Error	LBLQ01002496.1	10686	30952	+	99.91	78.13
NR_024386.2	440456	CHM13 CA Conservative 2.5% Error	LBLQ01002024.1	14860	41410	+	98.85	23.81
NR_038927.2	100506660	CHM13 CA Conservative 2.5% Error	LBLQ01000461.1	10245632	10285608	-	99.78	67.99
NR_038927.2	100506660	CHM13 CA Conservative 2.5% Error	LBLQ01000462.1	12477	25688	-	97.78	37.81
NR_110480.1	101927079	CHM13 CA Conservative 2.5% Error	LBLQ01002055.1	5270	49925	+	97.8	39.13
NR_110480.1	101927079	CHM13 CA Conservative 2.5% Error	LBLQ01002054.1	1170	10154	+	90.62	24.01
NR_110580.1	102723818	CHM13 CA Conservative 2.5% Error	LBLQ01001790.1	13583	54878	-	99.7	47.57
NR_110580.1	102723818	CHM13 CA Conservative 2.5% Error	LBLQ01001787.1	4127182	4128651	-	100	52.84
NR_110767.1	100652748	CHM13 CA Conservative 2.5% Error	LBLQ01001550.1	3745	28023	+	98.82	87.19
NR_110767.1	100652748	CHM13 CA Conservative 2.5% Error	LBLQ01001516.1	37639	38984	+	93.08	15.61
NR_110864.1	200030	CHM13 CA Conservative 2.5% Error	LBLQ01000641.1	23685	42705	-	98.31	71.42
NR_110864.1	200030	CHM13 CA Conservative 2.5% Error	LBLQ01002554.1	1375	29714	-	91.3	34.92
NR_046188.3	200030	CHM13 CA Conservative 2.5% Error	LBLQ01000641.1	23685	42705	-	98.35	67.58
NR_046188.3	200030	CHM13 CA Conservative 2.5% Error	LBLQ01002554.1	1375	29714	-	91.76	36.87
NR_110890.1	140876	CHM13 CA Conservative 2.5% Error	LBLQ01000906.1	7145	41172	+	99.94	84.33
NR_110890.1	140876	CHM13 CA Conservative 2.5% Error	LBLQ01000905.1	4544349	4544939	+	100	12.98
NR_038328.2	100132288	CHM13 CA Conservative 2.5% Error	LBLQ01004179.1	12106	14198	+	99.62	80.23
NR_038328.2	100132288	CHM13 CA Conservative 2.5% Error	LBLQ01003666.1	26716	28989	+	99.27	20.38
NR_111893.1	643827	CHM13 CA Conservative 2.5% Error	LBLQ01001682.1	211	60811	+	99.07	61.1
NR_111893.1	643827	CHM13 CA Conservative 2.5% Error	LBLQ01001680.1	21095	81502	+	98.65	33.54
NR_111893.1	643827	CHM13 CA Conservative 2.5% Error	LBLQ01002988.1	17263	41850	+	98.64	5.82
NR_104014.2	388685	CHM13 CA Conservative 2.5% Error	LBLQ01007242.1	20002	22376	+	99.88	74.19
NR_104014.2	388685	CHM13 CA Conservative 2.5% Error	LBLQ01001833.1	8912	9213	-	93.73	24.43
NR_027468.3	388685	CHM13 CA Conservative 2.5% Error	LBLQ01007242.1	18783	22376	+	99.48	85.18
NR_027468.3	388685	CHM13 CA Conservative 2.5% Error	LBLQ01001833.1	8912	9213	-	93.73	14.55
NR_029388.2	728407	CHM13 CA Conservative 2.5% Error	LBLQ01001541.1	144800	203554	-	99.1	54.07
NR_029388.2	728407	CHM13 CA Conservative 2.5% Error	LBLQ01001542.1	10352	43403	-	99.84	44.47
NR_110029.2	100874100	CHM13 CA Conservative 2.5% Error	LBLQ01001651.1	75936	77721	-	99.76	67.94
NR_110029.2	100874100	CHM13 CA Conservative 2.5% Error	LBLQ01005963.1	259298	259500	+	100	32.37
NR_111957.1	103091866	CHM13 CA Conservative 2.5% Error	LBLQ01001816.1	38076	40864	-	99.14	65.84
NR_111957.1	103091866	CHM13 CA Conservative 2.5% Error	LBLQ01001822.1	17449	18846	-	99.38	34.58
NR_111958.1	103091866	CHM13 CA Conservative 2.5% Error	LBLQ01001816.1	38076	40863	-	99.35	68.43
NR_111958.1	103091866	CHM13 CA Conservative 2.5% Error	LBLQ01001822.1	18412	18846	-	99.54	31.93
NR_111950.1	57234	CHM13 CA Conservative 2.5% Error	LBLQ01001816.1	59978	78638	-	99.6	79.83
NR_111950.1	57234	CHM13 CA Conservative 2.5% Error	LBLQ01001818.1	3081	12402	-	98.69	11.29
NR_111950.1	57234	CHM13 CA Conservative 2.5% Error	LBLQ01001821.1	19199	28023	-	94.4	10.74
NR_111954.1	103091866	CHM13 CA Conservative 2.5% Error	LBLQ01001816.1	38076	40863	-	99.41	70.37
NR_111954.1	103091866	CHM13 CA Conservative 2.5% Error	LBLQ01001822.1	18412	18846	-	99.54	29.97
NR_111956.1	103091866	CHM13 CA Conservative 2.5% Error	LBLQ01001816.1	38076	39293	-	99.1	64.45
NR_111956.1	103091866	CHM13 CA Conservative 2.5% Error	LBLQ01001822.1	18413	18846	-	99.53	35.96
NR_111955.1	103091866	CHM13 CA Conservative 2.5% Error	LBLQ01001816.1	38076	38760	-	99.12	61.25
NR_111955.1	103091866	CHM13 CA Conservative 2.5% Error	LBLQ01001822.1	18412	18846	-	99.54	38.92
NR_111952.1	57234	CHM13 CA Conservative 2.5% Error	LBLQ01001818.1	11323	12402	-	99.62	66.95
NR_111952.1	57234	CHM13 CA Conservative 2.5% Error	LBLQ01001821.1	27487	28023	-	97.97	33.29
NR_111953.1	57234	CHM13 CA Conservative 2.5% Error	LBLQ01001818.1	11323	12402	-	99.37	47.48
NR_111953.1	57234	CHM13 CA Conservative 2.5% Error	LBLQ01001821.1	27487	28023	-	97.97	52.9
NR_111951.1	57234	CHM13 CA Conservative 2.5% Error	LBLQ01001818.1	11323	12402	-	99.53	54.75
NR_111951.1	57234	CHM13 CA Conservative 2.5% Error	LBLQ01001821.1	27487	28023	-	97.97	45.58
NR_111963.1	339822	CHM13 CA Conservative 2.5% Error	LBLQ01000784.1	574557	575310	-	99.86	58.81
NR_111963.1	339822	CHM13 CA Conservative 2.5% Error	LBLQ01005981.1	657694	720402	+	96.04	44.46
NR_033880.3	339822	CHM13 CA Conservative 2.5% Error	LBLQ01000784.1	574557	575310	-	99.86	49.63
NR_033880.3	339822	CHM13 CA Conservative 2.5% Error	LBLQ01005981.1	657694	720402	+	97.18	53.12
NR_120455.1	101927905	CHM13 CA Conservative 2.5% Error	LBLQ01009867.1	25039	25626	+	98.97	72.7
NR_120455.1	101927905	CHM13 CA Conservative 2.5% Error	LBLQ01010017.1	2635	2860	+	97.78	28.03
NR_120535.1	100996712	CHM13 CA Conservative 2.5% Error	LBLQ01003076.1	1352	16638	+	99.42	74.19
NR_120535.1	100996712	CHM13 CA Conservative 2.5% Error	LBLQ01002292.1	33683	106868	+	99.5	26.32
NR_120611.1	101060691	CHM13 CA Conservative 2.5% Error	LBLQ01005632.1	27478	31236	+	98.48	84.28
NR_120611.1	101060691	CHM13 CA Conservative 2.5% Error	LBLQ01003157.1	2141456	2176041	+	94.52	11.02
NR_120612.1	101060691	CHM13 CA Conservative 2.5% Error	LBLQ01000031.1	5528	21297	+	98.21	55.91
NR_120612.1	101060691	CHM13 CA Conservative 2.5% Error	LBLQ01003157.1	2141456	2141852	+	98.99	43.48
NR_120613.1	101060691	CHM13 CA Conservative 2.5% Error	LBLQ01000031.1	36132	36690	-	100	42.57
NR_120613.1	101060691	CHM13 CA Conservative 2.5% Error	LBLQ01003157.1	2141456	2141852	+	98.99	29.82
NR_046203.2	643648	CHM13 CA Conservative 2.5% Error	LBLQ01008909.1	15261	17186	-	99.69	54.4
NR_046203.2	643648	CHM13 CA Conservative 2.5% Error	LBLQ01002658.1	72316	76345	+	100	44.73
NR_122076.1	403323	CHM13 CA Conservative 2.5% Error	LBLQ01002660.1	17631	18193	-	98.57	38.81
NR_122076.1	403323	CHM13 CA Conservative 2.5% Error	LBLQ01000949.1	2816227	2838917	+	89.71	37.98
NR_122076.1	403323	CHM13 CA Conservative 2.5% Error	LBLQ01007963.1	19136	21486	-	95.16	31
NR_123722.1	353511	CHM13 CA Conservative 2.5% Error	LBLQ01002119.1	124887	130803	+	99.94	65.19
NR_123722.1	353511	CHM13 CA Conservative 2.5% Error	LBLQ01002122.1	4768	14593	+	98.87	30.63
NR_123721.1	353511	CHM13 CA Conservative 2.5% Error	LBLQ01002119.1	115651	130803	+	99.95	77.4
NR_123721.1	353511	CHM13 CA Conservative 2.5% Error	LBLQ01002122.1	4768	15013	+	98.17	20.01
NR_123740.1	57494	CHM13 CA Conservative 2.5% Error	LBLQ01001444.1	2070498	2070813	-	84.37	19.52
NR_123740.1	57494	CHM13 CA Conservative 2.5% Error	LBLQ01001229.1	7160617	7161653	-	96.06	64.29
NR_125390.1	101927066	CHM13 CA Conservative 2.5% Error	LBLQ01002286.1	2947919	2949666	-	100	78.8
NR_125390.1	101927066	CHM13 CA Conservative 2.5% Error	LBLQ01001642.1	392553	419938	-	100	21.28
NR_125396.1	101927056	CHM13 CA Conservative 2.5% Error	LBLQ01008788.1	1927	14575	+	96.03	57.47
NR_125396.1	101927056	CHM13 CA Conservative 2.5% Error	LBLQ01009712.1	2926	19715	+	92.77	50.19
NR_125850.1	256691	CHM13 CA Conservative 2.5% Error	LBLQ01000427.1	37996	165030	-	99.95	62.67
NR_125850.1	256691	CHM13 CA Conservative 2.5% Error	LBLQ01003127.1	8868115	8876793	-	99.92	37.35
NR_125884.1	101927305	CHM13 CA Conservative 2.5% Error	LBLQ01007490.1	16967	25821	-	100	56.82
NR_125884.1	101927305	CHM13 CA Conservative 2.5% Error	LBLQ01004729.1	16393	16673	+	99.29	44.6
NR_130142.1	9720	CHM13 CA Conservative 2.5% Error	LBLQ01001982.1	6834	61336	-	99.36	67.73
NR_130142.1	9720	CHM13 CA Conservative 2.5% Error	LBLQ01001776.1	10239	32158	+	98.89	32.4
NR_130168.1	8505	CHM13 CA Conservative 2.5% Error	LBLQ01001541.1	105883	203554	-	99.95	50.59
NR_130168.1	8505	CHM13 CA Conservative 2.5% Error	LBLQ01001518.1	5267	15203	-	99.65	44.11
NR_130169.1	8505	CHM13 CA Conservative 2.5% Error	LBLQ01001541.1	105771	203553	-	99.95	69.96
NR_130169.1	8505	CHM13 CA Conservative 2.5% Error	LBLQ01001518.1	5267	15203	-	99.43	23.12
NR_130701.1	728323	CHM13 CA Conservative 2.5% Error	LBLQ01001264.1	3759	37629	-	100	51.09
NR_130701.1	728323	CHM13 CA Conservative 2.5% Error	LBLQ01005146.1	15178	16336	+	97.85	48.83
NR_130702.1	728323	CHM13 CA Conservative 2.5% Error	LBLQ01001264.1	5546	37629	-	97.01	41.24
NR_130702.1	728323	CHM13 CA Conservative 2.5% Error	LBLQ01005146.1	15176	16336	+	97.85	50.72
NR_130702.1	728323	CHM13 CA Conservative 2.5% Error	LBLQ01002636.1	1080	19948	-	95.93	24.89
NR_130699.1	728323	CHM13 CA Conservative 2.5% Error	LBLQ01001264.1	3756	37629	-	99.85	45.38
NR_130699.1	728323	CHM13 CA Conservative 2.5% Error	LBLQ01005146.1	15176	16336	+	97.85	46.51
NR_130700.1	728323	CHM13 CA Conservative 2.5% Error	LBLQ01001264.1	3759	37629	-	100	45.18
NR_130700.1	728323	CHM13 CA Conservative 2.5% Error	LBLQ01005146.1	15178	16336	+	97.85	54.73
NR_003655.3	84820	CHM13 CA Conservative 2.5% Error	LBLQ01001374.1	4152269	4184759	-	99.76	85.74
NR_003655.3	84820	CHM13 CA Conservative 2.5% Error	LBLQ01000920.1	9825	43956	-	96.3	11.98
NR_130740.1	348926	CHM13 CA Conservative 2.5% Error	LBLQ01009298.1	3009	4621	+	99.44	56.43
NR_130740.1	348926	CHM13 CA Conservative 2.5% Error	LBLQ01010322.1	3324	11623	-	97.12	43.3
NR_131772.1	375484	CHM13 CA Conservative 2.5% Error	LBLQ01005673.1	15882	67604	+	100	85.58
NR_131772.1	375484	CHM13 CA Conservative 2.5% Error	LBLQ01001428.1	156186	156465	+	99.64	14.32
NR_132119.1	441124	CHM13 CA Conservative 2.5% Error	LBLQ01002275.1	11852	28496	-	96.61	63.69
NR_132119.1	441124	CHM13 CA Conservative 2.5% Error	LBLQ01004043.1	1637	17403	-	98.67	48.42
NR_132337.1	642776	CHM13 CA Conservative 2.5% Error	LBLQ01000588.1	1014668	1014852	-	99.45	55.05
NR_132337.1	642776	CHM13 CA Conservative 2.5% Error	LBLQ01000592.1	80251	80403	-	100	45.53
NR_132997.1	106660613	CHM13 CA Conservative 2.5% Error	LBLQ01003415.1	5429	15843	+	99.79	47.13
NR_132997.1	106660613	CHM13 CA Conservative 2.5% Error	LBLQ01003003.1	17878	30397	-	100	52.76
NR_132998.1	106660613	CHM13 CA Conservative 2.5% Error	LBLQ01003415.1	5428	15843	+	99.79	69.72
NR_132998.1	106660613	CHM13 CA Conservative 2.5% Error	LBLQ01003003.1	27978	30397	-	100	30.27
NM_001187.1	574	CHM13 Default 5% Error	LBLP01005040.1	19165	21191	-	100	61.75
NM_001187.1	574	CHM13 Default 5% Error	LBLP01014396.1	18863	21919	-	95.79	47.41
NM_139320.1	89832	CHM13 Default 5% Error	LBLP01002257.1	445291	461067	+	99.68	77.29
NM_139320.1	89832	CHM13 Default 5% Error	LBLP01000350.1	152089	165407	+	100	22.6
NM_148911.1	89832	CHM13 Default 5% Error	LBLP01002257.1	445291	461067	+	99.68	79.06
NM_148911.1	89832	CHM13 Default 5% Error	LBLP01000350.1	152089	165407	+	100	20.83
NM_177998.1	133060	CHM13 Default 5% Error	LBLP01014372.1	7850	23688	-	99.76	67.73
NM_177998.1	133060	CHM13 Default 5% Error	LBLP01013413.1	3974	4414	-	98.18	23.27
NM_017990.3	55066	CHM13 Default 5% Error	LBLP01000059.1	22122	54635	-	99.79	83.52
NM_017990.3	55066	CHM13 Default 5% Error	LBLP01014602.1	6194	14469	-	97.27	14.98
NM_182484.1	85316	CHM13 Default 5% Error	LBLP01014385.1	6206	25794	-	99.13	62.6
NM_182484.1	85316	CHM13 Default 5% Error	LBLP01014396.1	20048	21907	-	98.72	21.35
NM_182484.1	85316	CHM13 Default 5% Error	LBLP01001913.1	29811	35818	-	98.37	16.68
NM_181704.1	85317	CHM13 Default 5% Error	LBLP01014385.1	6206	25795	-	99.65	62.71
NM_181704.1	85317	CHM13 Default 5% Error	LBLP01014381.1	40816	46977	-	99.66	16.14
NM_181704.1	85317	CHM13 Default 5% Error	LBLP01014396.1	20048	21907	-	98.72	21.35
NM_182481.1	85318	CHM13 Default 5% Error	LBLP01014385.1	6202	25794	-	98.87	61.07
NM_182481.1	85318	CHM13 Default 5% Error	LBLP01014383.1	727	9621	-	96.65	22.05
NM_182481.1	85318	CHM13 Default 5% Error	LBLP01001454.1	7559	19250	-	96.44	19.14
NM_182973.1	360200	CHM13 Default 5% Error	LBLP01010873.1	130	28485	-	100	64.55
NM_182973.1	360200	CHM13 Default 5% Error	LBLP01000050.1	1513778	1518018	-	99.82	35.66
NM_012173.3	26260	CHM13 Default 5% Error	LBLP01000914.1	1898092	1917993	-	99.66	74.96
NM_012173.3	26260	CHM13 Default 5% Error	LBLP01001449.1	91505	116239	+	99.4	20.51
NM_183420.1	26260	CHM13 Default 5% Error	LBLP01000914.1	1898092	1917993	-	99.66	73.41
NM_183420.1	26260	CHM13 Default 5% Error	LBLP01001449.1	91505	116241	+	99.4	20.18
NM_183421.1	26260	CHM13 Default 5% Error	LBLP01000914.1	1898092	1917993	-	99.66	73.71
NM_183421.1	26260	CHM13 Default 5% Error	LBLP01001449.1	91505	116241	+	99.4	19.96
NM_018268.2	55255	CHM13 Default 5% Error	LBLP01001326.1	6262023	6294593	-	100	82.36
NM_018268.2	55255	CHM13 Default 5% Error	LBLP01008423.1	8810783	8840186	+	99.68	24.34
NM_001389.3	1826	CHM13 Default 5% Error	LBLP01014826.1	26416	750622	-	99.97	58.39
NM_001389.3	1826	CHM13 Default 5% Error	LBLP01013779.1	15919	97365	+	99.89	41.63
NM_033547.3	92105	CHM13 Default 5% Error	LBLP01013628.1	4647	92141	-	99.02	68.22
NM_033547.3	92105	CHM13 Default 5% Error	LBLP01001866.1	6019036	6043952	-	99.9	35.15
NM_182943.2	5352	CHM13 Default 5% Error	LBLP01013367.1	9726	50737	+	100	79.21
NM_182943.2	5352	CHM13 Default 5% Error	LBLP01008409.1	1025	58141	-	100	29.1
NM_000935.2	5352	CHM13 Default 5% Error	LBLP01013367.1	9726	50737	+	100	78.88
NM_000935.2	5352	CHM13 Default 5% Error	LBLP01008409.1	1025	58141	-	100	29.55
NM_197941.2	11174	CHM13 Default 5% Error	LBLP01014540.1	2997073	3214338	-	99.47	75.59
NM_197941.2	11174	CHM13 Default 5% Error	LBLP01000711.1	93312	123722	-	99.94	25.95
NM_002285.2	3899	CHM13 Default 5% Error	LBLP01000929.1	93139	555178	+	99.97	96.46
NM_002285.2	3899	CHM13 Default 5% Error	LBLP01000927.1	6115918	6154163	+	100	3.54
NM_013430.2	2678	CHM13 Default 5% Error	LBLP01008425.1	333385	373407	+	100	63.37
NM_013430.2	2678	CHM13 Default 5% Error	LBLP01014620.1	28109	33339	-	98.43	42.69
NM_147182.3	80333	CHM13 Default 5% Error	LBLP01000380.1	311843	433846	+	98.3	86.5
NM_147182.3	80333	CHM13 Default 5% Error	LBLP01013284.1	613078	798823	-	99.65	12.35
NM_001035003.1	80333	CHM13 Default 5% Error	LBLP01000380.1	311829	433846	+	98.12	85.17
NM_001035003.1	80333	CHM13 Default 5% Error	LBLP01013284.1	547777	548122	-	100	14.27
NM_001035004.1	80333	CHM13 Default 5% Error	LBLP01000380.1	299045	433846	+	97.74	89.88
NM_001035004.1	80333	CHM13 Default 5% Error	LBLP01013284.1	394931	395197	-	99.62	11.38
NM_005054.2	84220	CHM13 Default 5% Error	LBLP01013590.1	1380403	1436422	+	98.41	74.38
NM_005054.2	84220	CHM13 Default 5% Error	LBLP01000924.1	56964	69541	-	100	30.25
NM_000552.3	7450	CHM13 Default 5% Error	LBLP01013692.1	11900	125025	-	99.86	69.03
NM_000552.3	7450	CHM13 Default 5% Error	LBLP01000197.1	5929184	5997167	-	99.54	39.85
NM_170606.2	58508	CHM13 Default 5% Error	LBLP01000037.1	1426700	1499211	-	99.99	76.71
NM_170606.2	58508	CHM13 Default 5% Error	LBLP01001811.1	183	22670	-	99.36	9.29
NM_170606.2	58508	CHM13 Default 5% Error	LBLP01013409.1	13750	32081	+	97.02	7.15
NM_170606.2	58508	CHM13 Default 5% Error	LBLP01001821.1	16767	142823	-	100	6.33
NM_170606.2	58508	CHM13 Default 5% Error	LBLP01014386.1	7090	20578	-	97.27	2.15
NM_173812.4	283417	CHM13 Default 5% Error	LBLP01000307.1	5110	49244	+	96.02	64.67
NM_173812.4	283417	CHM13 Default 5% Error	LBLP01001052.1	47218	121815	+	99.6	43.3
NM_032558.2	84641	CHM13 Default 5% Error	LBLP01013606.1	54618	100393	+	99.55	88.38
NM_032558.2	84641	CHM13 Default 5% Error	LBLP01012947.1	24604	24980	+	100	11.38
NM_000540.2	6261	CHM13 Default 5% Error	LBLP01015099.1	3111	119191	+	99.52	75.33
NM_000540.2	6261	CHM13 Default 5% Error	LBLP01014429.1	721	34860	-	99.85	22.81
NM_001042723.1	6261	CHM13 Default 5% Error	LBLP01015099.1	3111	119191	+	99.52	75.31
NM_001042723.1	6261	CHM13 Default 5% Error	LBLP01014429.1	721	34860	-	99.85	22.84
NM_000372.4	7299	CHM13 Default 5% Error	LBLP01000041.1	100725	178832	+	99.09	64.68
NM_000372.4	7299	CHM13 Default 5% Error	LBLP01013760.1	16509	27498	-	99.75	38.74
NM_152890.5	255631	CHM13 Default 5% Error	LBLP01006459.1	2192851	2604305	+	99.85	72.69
NM_152890.5	255631	CHM13 Default 5% Error	LBLP01006462.1	5388	13672	+	99.55	27.66
NM_052997.2	91074	CHM13 Default 5% Error	LBLP01000835.1	4579295	4631187	+	99.87	55.43
NM_052997.2	91074	CHM13 Default 5% Error	LBLP01000216.1	181	56536	+	99.83	56.14
NM_005577.2	4018	CHM13 Default 5% Error	LBLP01013600.1	3392	79859	+	99.92	58.03
NM_005577.2	4018	CHM13 Default 5% Error	LBLP01013196.1	3835	37300	+	99.1	34.39
NM_005224.2	1820	CHM13 Default 5% Error	LBLP01000053.1	2076	20488	+	99.21	67.58
NM_005224.2	1820	CHM13 Default 5% Error	LBLP01000515.1	710785	717496	+	99.59	34.89
NM_021012.4	3768	CHM13 Default 5% Error	LBLP01001575.1	23144	32597	+	98.21	53.51
NM_021012.4	3768	CHM13 Default 5% Error	LBLP01014626.1	35051	67305	+	99.53	12.4
NM_001079673.1	22862	CHM13 Default 5% Error	LBLP01014431.1	7302	49839	+	100	79.6
NM_001079673.1	22862	CHM13 Default 5% Error	LBLP01013395.1	16732262	16902298	+	100	20.33
NM_022892.1	4671	CHM13 Default 5% Error	LBLP01001676.1	81627	101013	-	99.95	81.81
NM_022892.1	4671	CHM13 Default 5% Error	LBLP01000711.1	4248813	4275129	+	99.25	18.11
NM_004536.2	4671	CHM13 Default 5% Error	LBLP01001676.1	81627	101013	-	99.95	73.43
NM_004536.2	4671	CHM13 Default 5% Error	LBLP01000711.1	4248813	4275129	+	99.48	26.49
NM_198455.2	23145	CHM13 Default 5% Error	LBLP01000369.1	1	45437	-	99.81	81.05
NM_198455.2	23145	CHM13 Default 5% Error	LBLP01013651.1	95691	104699	-	99.6	11.22
NM_022065.4	63892	CHM13 Default 5% Error	LBLP01000021.1	27452866	27507756	+	99.97	55.54
NM_022065.4	63892	CHM13 Default 5% Error	LBLP01006482.1	37599854	37910368	-	99.96	46.95
NM_001083953.1	63892	CHM13 Default 5% Error	LBLP01000021.1	27452938	27507756	+	99.97	57.02
NM_001083953.1	63892	CHM13 Default 5% Error	LBLP01006482.1	37599854	37910368	-	99.96	45.38
NM_001039615.3	728957	CHM13 Default 5% Error	LBLP01013316.1	15601	26731	-	99.85	91.69
NM_001039615.3	728957	CHM13 Default 5% Error	LBLP01001278.1	31665	31974	+	99.35	8.41
NM_006267.4	5903	CHM13 Default 5% Error	LBLP01015085.1	1531	38414	+	99.92	89.81
NM_006267.4	5903	CHM13 Default 5% Error	LBLP01012515.1	871335	887553	+	97.02	7.75
NM_170678.2	27231	CHM13 Default 5% Error	LBLP01000050.1	2463	3057	-	100	27.67
NM_170678.2	27231	CHM13 Default 5% Error	LBLP01014171.1	3101027	3103560	-	98.12	47.06
NM_020823.1	57583	CHM13 Default 5% Error	LBLP01013600.1	1982469	2012685	-	100	83.06
NM_020823.1	57583	CHM13 Default 5% Error	LBLP01013602.1	1756	70831	-	100	18.43
NM_182482.2	85319	CHM13 Default 5% Error	LBLP01014384.1	574	29383	-	98.51	74.66
NM_182482.2	85319	CHM13 Default 5% Error	LBLP01014396.1	3675	21907	-	92.47	19.09
NM_001103154.1	100506084	CHM13 Default 5% Error	LBLP01015087.1	450059	458995	+	100	75.61
NM_001103154.1	100506084	CHM13 Default 5% Error	LBLP01001343.1	19029	19149	-	100	24.79
NM_021259.2	58986	CHM13 Default 5% Error	LBLP01000524.1	18	5173	-	100	20.92
NM_021259.2	58986	CHM13 Default 5% Error	LBLP01010768.1	1	741	+	99.86	20.26
NM_006382.3	374286	CHM13 Default 5% Error	LBLP01014724.1	2111	2699	+	97.62	21.28
NM_006382.3	374286	CHM13 Default 5% Error	LBLP01014723.1	27849	58069	+	99.18	79.42
NM_017653.3	54808	CHM13 Default 5% Error	LBLP01014517.1	2016676	2366554	-	100	80.89
NM_017653.3	54808	CHM13 Default 5% Error	LBLP01004260.1	30879165	30909940	+	99.41	19.4
NM_006310.3	9520	CHM13 Default 5% Error	LBLP01008421.1	3069	43656	+	99.94	82.5
NM_006310.3	9520	CHM13 Default 5% Error	LBLP01001542.1	8685	23606	-	100	12.9
NM_006852.3	11011	CHM13 Default 5% Error	LBLP01014618.1	971	80271	+	99.91	88.36
NM_006852.3	11011	CHM13 Default 5% Error	LBLP01012998.1	32871	35059	+	99.71	6.47
NM_001303.3	1352	CHM13 Default 5% Error	LBLP01014723.1	1418371	1435060	-	99.52	70.01
NM_001303.3	1352	CHM13 Default 5% Error	LBLP01014725.1	30737	121279	-	99.66	29.8
NM_000845.2	2918	CHM13 Default 5% Error	LBLP01004288.1	23175663	23507675	-	99.85	59.31
NM_000845.2	2918	CHM13 Default 5% Error	LBLP01013625.1	1235860	1576691	+	100	41.09
NM_001127323.1	2918	CHM13 Default 5% Error	LBLP01004288.1	23175663	23507675	-	99.86	56.11
NM_001127323.1	2918	CHM13 Default 5% Error	LBLP01013625.1	1227001	1576691	+	100	44.25
NM_173678.2	285966	CHM13 Default 5% Error	LBLP01009851.1	3514	9932	+	99.43	23.83
NM_173678.2	285966	CHM13 Default 5% Error	LBLP01000372.1	10011	15412	+	99.6	76.68
NM_001130025.1	285966	CHM13 Default 5% Error	LBLP01009851.1	3017	9932	+	99.17	24.19
NM_001130025.1	285966	CHM13 Default 5% Error	LBLP01000372.1	10011	15412	+	99.6	76.32
NM_172362.2	3756	CHM13 Default 5% Error	LBLP01014050.1	4245119	4487161	-	99.84	85.19
NM_172362.2	3756	CHM13 Default 5% Error	LBLP01014051.1	13647	128876	-	99.83	14.9
NM_002238.3	3756	CHM13 Default 5% Error	LBLP01014050.1	4245119	4487160	-	99.84	86.04
NM_002238.3	3756	CHM13 Default 5% Error	LBLP01014051.1	13734	128876	-	100	13.98
NM_004061.3	1010	CHM13 Default 5% Error	LBLP01001323.1	194342	307604	-	98.79	64.18
NM_004061.3	1010	CHM13 Default 5% Error	LBLP01013671.1	11301820	11944571	+	99.35	21.33
NM_004061.3	1010	CHM13 Default 5% Error	LBLP01001326.1	36870	274108	-	99.18	19.79
NM_001134445.1	23576	CHM13 Default 5% Error	LBLP01013548.1	1960123	2137933	-	99.91	90.51
NM_001134445.1	23576	CHM13 Default 5% Error	LBLP01006462.1	164577	164956	+	100	9.44
NM_198562.2	375341	CHM13 Default 5% Error	LBLP01013730.1	1469	4318	+	100	79.38
NM_198562.2	375341	CHM13 Default 5% Error	LBLP01000421.1	2	1503	-	93.86	25.43
NM_017952.5	55037	CHM13 Default 5% Error	LBLP01015103.1	1151	19610	+	99.73	89.32
NM_017952.5	55037	CHM13 Default 5% Error	LBLP01000002.1	19885328	19898200	+	99.18	9.09
NM_020768.3	57528	CHM13 Default 5% Error	LBLP01001670.1	121151	148810	+	99.19	73.76
NM_020768.3	57528	CHM13 Default 5% Error	LBLP01013622.1	44523310	44594015	+	98.18	30.73
NM_001135865.1	100132247	CHM13 Default 5% Error	LBLP01001067.1	826	13272	+	99.36	82.7
NM_001135865.1	100132247	CHM13 Default 5% Error	LBLP01014625.1	9293	9692	-	97.5	10.45
NM_182588.2	285190	CHM13 Default 5% Error	LBLP01013590.1	1380398	1436422	+	98.76	74.55
NM_182588.2	285190	CHM13 Default 5% Error	LBLP01009872.1	6807	19392	+	98.98	30.2
NM_130785.3	93492	CHM13 Default 5% Error	LBLP01014419.1	5750	49028	+	94.66	64.49
NM_130785.3	93492	CHM13 Default 5% Error	LBLP01014421.1	5444141	5506969	+	98.98	28.34
NM_199254.2	93492	CHM13 Default 5% Error	LBLP01014419.1	3723	49028	+	95.53	68.16
NM_199254.2	93492	CHM13 Default 5% Error	LBLP01014421.1	5444141	5506968	+	99.17	30.59
NM_001141968.1	93492	CHM13 Default 5% Error	LBLP01014419.1	5504	49028	+	95.09	66.79
NM_001141968.1	93492	CHM13 Default 5% Error	LBLP01014421.1	5444141	5528522	+	96.92	37.27
NM_018723.3	54715	CHM13 Default 5% Error	LBLP01013675.1	91273	754026	+	99.81	79.64
NM_018723.3	54715	CHM13 Default 5% Error	LBLP01013693.1	3455022	4098400	+	99.1	21
NM_001142333.1	54715	CHM13 Default 5% Error	LBLP01013675.1	91273	754026	+	99.81	79.29
NM_001142333.1	54715	CHM13 Default 5% Error	LBLP01013693.1	3455022	4098400	+	99.1	21.36
NM_001099676.2	115749	CHM13 Default 5% Error	LBLP01014110.1	7777173	7881598	+	100	46.16
NM_001099676.2	115749	CHM13 Default 5% Error	LBLP01014115.1	788	18569	+	100	53.42
NM_015092.4	23049	CHM13 Default 5% Error	LBLP01015076.1	1534060	1602991	-	99.89	89.64
NM_015092.4	23049	CHM13 Default 5% Error	LBLP01001610.1	926	18076	-	97.61	8.85
NM_015092.4	23049	CHM13 Default 5% Error	LBLP01014612.1	26476	26933	-	99.34	2.83
NM_001143837.1	50507	CHM13 Default 5% Error	LBLP01013755.1	14758	45488	+	99.24	65.33
NM_001143837.1	50507	CHM13 Default 5% Error	LBLP01000040.1	657	190324	+	99.74	33.32
NM_001144013.1	653489	CHM13 Default 5% Error	LBLP01013590.1	1380423	1463898	+	98.72	92.13
NM_001144013.1	653489	CHM13 Default 5% Error	LBLP01001643.1	17143	17701	-	99.46	9.51
NM_005708.3	10082	CHM13 Default 5% Error	LBLP01000393.1	9965951	9991422	-	99.96	74.92
NM_005708.3	10082	CHM13 Default 5% Error	LBLP01000396.1	64740	1143866	-	99.44	25.26
NM_003156.3	6786	CHM13 Default 5% Error	LBLP01001299.1	143766	213096	-	99.96	79.29
NM_003156.3	6786	CHM13 Default 5% Error	LBLP01008416.1	43434	44140	-	100	17.4
NM_001145029.1	374860	CHM13 Default 5% Error	LBLP01013258.1	34132	100605	+	99.95	53.36
NM_001145029.1	374860	CHM13 Default 5% Error	LBLP01003013.1	106028	179901	+	97.85	56.2
NM_001142800.1	346007	CHM13 Default 5% Error	LBLP01000034.1	17583	1600971	+	99.96	78.26
NM_001142800.1	346007	CHM13 Default 5% Error	LBLP01000011.1	20301973	20671935	+	100	21.75
NM_001105521.2	282973	CHM13 Default 5% Error	LBLP01004272.1	3794	69920	-	99.45	61.92
NM_001105521.2	282973	CHM13 Default 5% Error	LBLP01000052.1	1462317	1470920	-	99.4	38.5
NM_001143831.2	2915	CHM13 Default 5% Error	LBLP01013628.1	10588172	10933852	-	99.94	89.12
NM_001143831.2	2915	CHM13 Default 5% Error	LBLP01013763.1	59205	80675	+	96.15	12.22
NM_024850.2	79908	CHM13 Default 5% Error	LBLP01000272.1	3337	45668	+	100	87.43
NM_024850.2	79908	CHM13 Default 5% Error	LBLP01001653.1	5414	5701	-	99.3	12.86
NM_001040462.2	79908	CHM13 Default 5% Error	LBLP01000272.1	3337	45668	+	100	86.66
NM_001040462.2	79908	CHM13 Default 5% Error	LBLP01001653.1	5414	5701	-	99.3	13.65
NM_001159707.1	79908	CHM13 Default 5% Error	LBLP01000272.1	6091	45668	+	100	84
NM_001159707.1	79908	CHM13 Default 5% Error	LBLP01001653.1	5396	5701	-	96.4	17.09
NM_001159708.1	79908	CHM13 Default 5% Error	LBLP01000272.1	3337	45668	+	100	87.31
NM_001159708.1	79908	CHM13 Default 5% Error	LBLP01001653.1	5414	5701	-	99.3	12.98
NM_001159709.1	79908	CHM13 Default 5% Error	LBLP01000272.1	6094	45668	+	100	81.46
NM_001159709.1	79908	CHM13 Default 5% Error	LBLP01001653.1	2376	5701	-	100	18.43
NM_001160116.1	123207	CHM13 Default 5% Error	LBLP01013667.1	770488	797300	-	97.68	29.52
NM_001160116.1	123207	CHM13 Default 5% Error	LBLP01014515.1	193029	193414	+	86.82	62.35
NM_175722.3	7173	CHM13 Default 5% Error	LBLP01000063.1	4786	109620	-	99.38	83.64
NM_175722.3	7173	CHM13 Default 5% Error	LBLP01004263.1	4110106	4112240	-	100	17.26
NM_175721.3	7173	CHM13 Default 5% Error	LBLP01000063.1	4786	109620	-	99.48	85.8
NM_175721.3	7173	CHM13 Default 5% Error	LBLP01004263.1	4110106	4112240	-	100	14.97
NM_175719.3	7173	CHM13 Default 5% Error	LBLP01000063.1	4786	110567	-	99.45	86.04
NM_175719.3	7173	CHM13 Default 5% Error	LBLP01004263.1	4110106	4112240	-	100	14.72
NM_000547.5	7173	CHM13 Default 5% Error	LBLP01000063.1	4786	110567	-	99.48	86.8
NM_000547.5	7173	CHM13 Default 5% Error	LBLP01004263.1	4110106	4112240	-	100	13.92
NM_181453.3	9648	CHM13 Default 5% Error	LBLP01000925.1	7684	58285	-	99.94	73.53
NM_181453.3	9648	CHM13 Default 5% Error	LBLP01001536.1	2563	4411	+	98.33	26.35
NM_001164315.1	375248	CHM13 Default 5% Error	LBLP01014415.1	1977	78610	-	99.08	50.48
NM_001164315.1	375248	CHM13 Default 5% Error	LBLP01014381.1	1578	38847	+	93.05	37.98
NM_001164315.1	375248	CHM13 Default 5% Error	LBLP01001247.1	52748	66462	+	96.99	17.38
NM_025190.3	57730	CHM13 Default 5% Error	LBLP01014407.1	23956	57235	-	99.88	60.42
NM_025190.3	57730	CHM13 Default 5% Error	LBLP01001248.1	1541	38540	+	97.23	25.89
NM_025190.3	57730	CHM13 Default 5% Error	LBLP01000392.1	1800	44984	-	97.25	18.81
NM_001164458.1	653857	CHM13 Default 5% Error	LBLP01013644.1	396830	438839	+	99.76	64.86
NM_001164458.1	653857	CHM13 Default 5% Error	LBLP01013645.1	16966	27681	+	99.59	38.64
NM_001164459.1	653857	CHM13 Default 5% Error	LBLP01013644.1	417513	438839	+	99.61	63.1
NM_001164459.1	653857	CHM13 Default 5% Error	LBLP01013645.1	16966	27681	+	99.59	40.6
NM_001164463.1	727851	CHM13 Default 5% Error	LBLP01013590.1	1380344	1436420	+	98.22	73.96
NM_001164463.1	727851	CHM13 Default 5% Error	LBLP01000924.1	56945	69541	-	99.9	29.96
NM_002338.3	4045	CHM13 Default 5% Error	LBLP01013341.1	22038240	22343404	-	99.7	93.15
NM_002338.3	4045	CHM13 Default 5% Error	LBLP01004280.1	91935	97754	-	98.32	7.52
NM_001164507.1	4703	CHM13 Default 5% Error	LBLP01013534.1	22560003	22698376	+	99.93	54.99
NM_001164507.1	4703	CHM13 Default 5% Error	LBLP01013536.1	593	107398	+	99.92	43.04
NM_001164508.1	4703	CHM13 Default 5% Error	LBLP01013534.1	22560003	22698376	+	99.93	54.99
NM_001164508.1	4703	CHM13 Default 5% Error	LBLP01013536.1	593	107398	+	99.92	43.04
NM_004543.4	4703	CHM13 Default 5% Error	LBLP01013534.1	22560003	22684672	+	99.97	57.18
NM_004543.4	4703	CHM13 Default 5% Error	LBLP01013536.1	16349	107398	+	99.95	42.79
NM_001123363.3	729540	CHM13 Default 5% Error	LBLP01013590.1	1380250	1436422	+	97.93	71.89
NM_001123363.3	729540	CHM13 Default 5% Error	LBLP01000924.1	56945	69541	-	100	28.62
NM_147127.4	132884	CHM13 Default 5% Error	LBLP01013304.1	2890	129073	-	99.49	71.1
NM_147127.4	132884	CHM13 Default 5% Error	LBLP01013417.1	119714	150723	-	99.23	35.78
NM_001166136.1	132884	CHM13 Default 5% Error	LBLP01013304.1	2890	130054	-	99.52	73.7
NM_001166136.1	132884	CHM13 Default 5% Error	LBLP01013417.1	119714	147717	-	99.23	32.3
NM_001077653.2	57057	CHM13 Default 5% Error	LBLP01008431.1	683828	706441	+	99.7	75.54
NM_001077653.2	57057	CHM13 Default 5% Error	LBLP01001052.1	1777	31001	+	99.62	29.11
NM_001170633.1	115749	CHM13 Default 5% Error	LBLP01014110.1	7777173	7881598	+	99.91	59.01
NM_001170633.1	115749	CHM13 Default 5% Error	LBLP01014115.1	788	18569	+	100	41.03
NM_147195.2	253650	CHM13 Default 5% Error	LBLP01013033.1	16528	52733	-	96.78	78.17
NM_147195.2	253650	CHM13 Default 5% Error	LBLP01013035.1	6259	23458	-	100	25.02
NM_017677.3	55613	CHM13 Default 5% Error	LBLP01004271.1	7357896	7449626	+	99.26	60.71
NM_017677.3	55613	CHM13 Default 5% Error	LBLP01013277.1	1095312	1098304	-	100	40.96
NM_001178055.1	79668	CHM13 Default 5% Error	LBLP01013679.1	77560	173966	+	99.92	95.47
NM_001178055.1	79668	CHM13 Default 5% Error	LBLP01014497.1	176057	178286	+	100	4.55
NM_024615.3	79668	CHM13 Default 5% Error	LBLP01013679.1	77560	173966	+	99.92	95.79
NM_024615.3	79668	CHM13 Default 5% Error	LBLP01014497.1	177099	178286	+	100	4.23
NM_018196.3	55217	CHM13 Default 5% Error	LBLP01015089.1	1	107494	-	99.91	30.67
NM_018196.3	55217	CHM13 Default 5% Error	LBLP01014611.1	775199	778699	+	99.53	70.81
NM_138618.3	6006	CHM13 Default 5% Error	LBLP01013331.1	3762	35659	-	99.41	69.13
NM_138618.3	6006	CHM13 Default 5% Error	LBLP01013329.1	11310	24492	+	100	30.99
NM_138616.3	6006	CHM13 Default 5% Error	LBLP01013331.1	512	35659	-	98.31	60.68
NM_138616.3	6006	CHM13 Default 5% Error	LBLP01013329.1	919	24492	+	99.66	50.72
NM_020485.4	6006	CHM13 Default 5% Error	LBLP01013331.1	512	35659	-	98.97	71.69
NM_020485.4	6006	CHM13 Default 5% Error	LBLP01013329.1	918	24492	+	99.66	36.58
NM_138617.3	6006	CHM13 Default 5% Error	LBLP01013331.1	511	35659	-	98.59	69.17
NM_138617.3	6006	CHM13 Default 5% Error	LBLP01013329.1	918	24492	+	99.61	41.86
NM_022359.5	9659	CHM13 Default 5% Error	LBLP01014034.1	14474	15403	+	99.46	43.76
NM_022359.5	9659	CHM13 Default 5% Error	LBLP01006472.1	45084	45638	+	99.64	32.43
NM_001195811.1	200150	CHM13 Default 5% Error	LBLP01013359.1	2553	179606	+	100	85.68
NM_001195811.1	200150	CHM13 Default 5% Error	LBLP01014032.1	3285	107837	-	99.27	9.14
NM_001195812.1	200150	CHM13 Default 5% Error	LBLP01013359.1	2554	179606	+	100	90.51
NM_001195812.1	200150	CHM13 Default 5% Error	LBLP01014032.1	6549	107837	-	98.57	9.69
NM_152666.2	200150	CHM13 Default 5% Error	LBLP01013359.1	2553	179606	+	100	78.24
NM_152666.2	200150	CHM13 Default 5% Error	LBLP01014032.1	3285	183035	-	99.64	17.03
NM_001199417.1	57636	CHM13 Default 5% Error	LBLP01001064.1	1597	59241	-	99.63	50.61
NM_001199417.1	57636	CHM13 Default 5% Error	LBLP01015177.1	658	22948	+	99.93	49.27
NM_001200001.1	4853	CHM13 Default 5% Error	LBLP01014513.1	2580870	2643100	-	99.94	83.57
NM_001200001.1	4853	CHM13 Default 5% Error	LBLP01006501.1	19746	20129	+	96.9	8.87
NM_024408.3	4853	CHM13 Default 5% Error	LBLP01014513.1	2557310	2643100	-	99.98	93.82
NM_024408.3	4853	CHM13 Default 5% Error	LBLP01006501.1	19746	20129	+	96.9	3.34
NM_016154.4	53916	CHM13 Default 5% Error	LBLP01015099.1	2326688	2335449	+	100	67.83
NM_016154.4	53916	CHM13 Default 5% Error	LBLP01015100.1	1990322	1990699	-	100	31.79
NM_016434.3	51750	CHM13 Default 5% Error	LBLP01000058.1	2637	38102	-	99.07	77.8
NM_016434.3	51750	CHM13 Default 5% Error	LBLP01000530.1	605177	607061	-	99.73	22.98
NM_032957.4	51750	CHM13 Default 5% Error	LBLP01000058.1	2637	38102	-	99.08	78.12
NM_032957.4	51750	CHM13 Default 5% Error	LBLP01000530.1	605177	607061	-	99.73	22.65
NM_001206744.1	7173	CHM13 Default 5% Error	LBLP01000063.1	4786	110567	-	99.48	86.67
NM_001206744.1	7173	CHM13 Default 5% Error	LBLP01004263.1	4110106	4112240	-	100	13.94
NM_001206745.1	7173	CHM13 Default 5% Error	LBLP01000063.1	4786	110567	-	99.45	85.9
NM_001206745.1	7173	CHM13 Default 5% Error	LBLP01004263.1	4110106	4112240	-	100	14.74
NM_152770.2	255119	CHM13 Default 5% Error	LBLP01013978.1	181185	274945	+	99.8	57.31
NM_152770.2	255119	CHM13 Default 5% Error	LBLP01004264.1	10738782	11017339	+	97.89	47.17
NM_001206997.1	255119	CHM13 Default 5% Error	LBLP01013978.1	181185	274945	+	99.8	54.22
NM_001206997.1	255119	CHM13 Default 5% Error	LBLP01004264.1	10738782	11037286	+	98.06	48.63
NM_001242672.1	100287898	CHM13 Default 5% Error	LBLP01001443.1	9760	13960	+	99.9	57.4
NM_001242672.1	100287898	CHM13 Default 5% Error	LBLP01012516.1	10128085	10134162	+	100	42.92
NM_178539.4	338811	CHM13 Default 5% Error	LBLP01014125.1	60017	231073	+	99.35	63.9
NM_178539.4	338811	CHM13 Default 5% Error	LBLP01014121.1	1338795	1340376	+	100	38.24
NM_022662.3	64682	CHM13 Default 5% Error	LBLP01003023.1	227949	287647	-	99.38	61.19
NM_022662.3	64682	CHM13 Default 5% Error	LBLP01015074.1	475793	509233	+	99.94	24.49
NM_022662.3	64682	CHM13 Default 5% Error	LBLP01003022.1	2257	15354	-	98.29	9.06
NM_022662.3	64682	CHM13 Default 5% Error	LBLP01012699.1	34352	46512	-	97.17	7.76
NM_152570.2	158038	CHM13 Default 5% Error	LBLP01000420.1	175560	239884	+	100	82.63
NM_152570.2	158038	CHM13 Default 5% Error	LBLP01004273.1	4836860	5270120	+	99.32	18.2
NM_001258282.1	158038	CHM13 Default 5% Error	LBLP01000420.1	237261	239884	+	100	83.14
NM_001258282.1	158038	CHM13 Default 5% Error	LBLP01004273.1	4342720	5270120	+	99.12	18.12
NM_001040135.2	57180	CHM13 Default 5% Error	LBLP01015109.1	869387	870310	-	100	46.03
NM_001040135.2	57180	CHM13 Default 5% Error	LBLP01013644.1	425142	435747	+	98.71	30.84
NM_001040135.2	57180	CHM13 Default 5% Error	LBLP01013651.1	19902	38423	+	99.65	14.5
NM_020445.5	57180	CHM13 Default 5% Error	LBLP01015109.1	869387	872645	-	99.73	51.28
NM_020445.5	57180	CHM13 Default 5% Error	LBLP01013644.1	425142	435747	+	98.71	27.93
NM_020445.5	57180	CHM13 Default 5% Error	LBLP01013651.1	19902	49618	+	97.94	15.15
NM_001270837.1	1397	CHM13 Default 5% Error	LBLP01012520.1	680855	682028	-	99.87	47.01
NM_001270837.1	1397	CHM13 Default 5% Error	LBLP01014351.1	81514890	81522549	+	97.3	38.49
NM_001270974.1	54768	CHM13 Default 5% Error	LBLP01013721.1	24452	174291	-	99.68	17.94
NM_001270974.1	54768	CHM13 Default 5% Error	LBLP01013716.1	6333	160708	-	99.75	64.19
NM_001270974.1	54768	CHM13 Default 5% Error	LBLP01001102.1	594388	605576	-	100	7.2
NM_001271208.1	4703	CHM13 Default 5% Error	LBLP01013534.1	22560003	22698376	+	99.93	54.77
NM_001271208.1	4703	CHM13 Default 5% Error	LBLP01013536.1	593	107398	+	99.92	43.27
NM_001271534.1	1826	CHM13 Default 5% Error	LBLP01014826.1	26416	750622	-	99.97	58.85
NM_001271534.1	1826	CHM13 Default 5% Error	LBLP01013779.1	15919	97365	+	99.89	41.19
NM_001271872.1	653464	CHM13 Default 5% Error	LBLP01014047.1	8008	23269	+	99.46	67.17
NM_001271872.1	653464	CHM13 Default 5% Error	LBLP01014045.1	50572	123694	+	98.28	24.23
NM_018264.3	55253	CHM13 Default 5% Error	LBLP01004508.1	1264026	1369102	+	98.2	46.31
NM_018264.3	55253	CHM13 Default 5% Error	LBLP01002280.1	14347	15561	-	100	36.11
NM_018264.3	55253	CHM13 Default 5% Error	LBLP01004513.1	9989	44306	+	98.15	12.75
NM_018264.3	55253	CHM13 Default 5% Error	LBLP01004510.1	13185	36352	+	97.47	9.36
NM_001037501.2	728841	CHM13 Default 5% Error	LBLP01014035.1	13055	47093	-	98.15	92.45
NM_001037501.2	728841	CHM13 Default 5% Error	LBLP01014039.1	1059	1411	-	98.02	7.61
NM_001039703.5	100132406	CHM13 Default 5% Error	LBLP01013023.1	73	31926	-	98.49	45.2
NM_001039703.5	100132406	CHM13 Default 5% Error	LBLP01014772.1	2605	22703	+	96.53	21.65
NM_001039703.5	100132406	CHM13 Default 5% Error	LBLP01014528.1	581	6221	-	95.09	9.45
NM_017940.4	55672	CHM13 Default 5% Error	LBLP01004282.1	1010	21591	+	98.47	63.38
NM_017940.4	55672	CHM13 Default 5% Error	LBLP01014769.1	5299	33448	+	98.28	32.94
NM_001277961.1	6786	CHM13 Default 5% Error	LBLP01001299.1	143766	213096	-	99.97	80.8
NM_001277961.1	6786	CHM13 Default 5% Error	LBLP01008416.1	43434	44140	-	100	16.14
NM_001277962.1	6786	CHM13 Default 5% Error	LBLP01001299.1	143766	213096	-	99.96	79.48
NM_001277962.1	6786	CHM13 Default 5% Error	LBLP01008416.1	43434	44140	-	100	17.24
NM_001278141.1	149013	CHM13 Default 5% Error	LBLP01014035.1	13160	47093	-	99.8	80.39
NM_001278141.1	149013	CHM13 Default 5% Error	LBLP01014059.1	1	24687	-	90.97	22.18
NM_001007237.2	3321	CHM13 Default 5% Error	LBLP01013696.1	22272	64342	+	99.92	88.88
NM_001007237.2	3321	CHM13 Default 5% Error	LBLP01013198.1	695481	722823	+	97.97	12.06
NM_001542.3	3321	CHM13 Default 5% Error	LBLP01013696.1	3274	64342	+	99.6	92.16
NM_001542.3	3321	CHM13 Default 5% Error	LBLP01013198.1	696280	722823	+	97.85	10.26
NM_001278267.1	100288142	CHM13 Default 5% Error	LBLP01014776.1	1116	34250	+	97.25	24.85
NM_001278267.1	100288142	CHM13 Default 5% Error	LBLP01014035.1	13055	42794	-	96.07	24.93
NM_001278267.1	100288142	CHM13 Default 5% Error	LBLP01014783.1	490	24926	+	95.24	17.64
NM_001278267.1	100288142	CHM13 Default 5% Error	LBLP01014780.1	782	22198	+	95.45	16.66
NM_001278267.1	100288142	CHM13 Default 5% Error	LBLP01014789.1	121	16214	+	93.23	14.67
NM_001278267.1	100288142	CHM13 Default 5% Error	LBLP01014786.1	1234	15732	+	92.29	10.21
NM_001278267.1	100288142	CHM13 Default 5% Error	LBLP01013025.1	637	13396	-	96.85	9.31
NM_001278267.1	100288142	CHM13 Default 5% Error	LBLP01014527.1	1	9355	-	95.02	8.22
NM_015383.2	25832	CHM13 Default 5% Error	LBLP01013023.1	73	31926	-	98.73	50.59
NM_015383.2	25832	CHM13 Default 5% Error	LBLP01014035.1	13055	47093	-	96.18	44.24
NM_173638.4	284565	CHM13 Default 5% Error	LBLP01006466.1	11640	30654	-	98.61	89.63
NM_173638.4	284565	CHM13 Default 5% Error	LBLP01014060.1	10231	16207	-	98.33	7.02
NM_001170755.2	284565	CHM13 Default 5% Error	LBLP01006466.1	11640	30941	-	98.65	83.5
NM_001170755.2	284565	CHM13 Default 5% Error	LBLP01014060.1	59	18857	-	97.45	18.65
NM_014923.4	22862	CHM13 Default 5% Error	LBLP01014431.1	7302	49839	+	100	84.67
NM_014923.4	22862	CHM13 Default 5% Error	LBLP01013395.1	16866655	16902298	+	100	15.28
NM_001278438.1	22862	CHM13 Default 5% Error	LBLP01014431.1	7302	49839	+	100	79.06
NM_001278438.1	22862	CHM13 Default 5% Error	LBLP01013395.1	16732959	16902298	+	100	20.87
NM_005560.4	3911	CHM13 Default 5% Error	LBLP01000058.1	1346698	1396362	+	99.65	63.95
NM_005560.4	3911	CHM13 Default 5% Error	LBLP01014885.1	21739059	21747826	-	99.95	36.09
NM_172020.4	9883	CHM13 Default 5% Error	LBLP01001757.1	12887	56166	+	99.75	95.56
NM_172020.4	9883	CHM13 Default 5% Error	LBLP01001754.1	13415	13920	+	96.34	5.92
NM_001257190.2	9883	CHM13 Default 5% Error	LBLP01001757.1	21609	59302	+	99.75	88.04
NM_001257190.2	9883	CHM13 Default 5% Error	LBLP01001754.1	2150	13898	+	99.41	12.12
NM_001283009.1	51750	CHM13 Default 5% Error	LBLP01000058.1	2637	38102	-	99.07	75.23
NM_001283009.1	51750	CHM13 Default 5% Error	LBLP01000530.1	605177	607061	-	99.77	25.54
NM_001283010.1	51750	CHM13 Default 5% Error	LBLP01000058.1	2637	38102	-	99.02	76.48
NM_001283010.1	51750	CHM13 Default 5% Error	LBLP01000530.1	605177	607061	-	99.73	24.35
NM_001284333.1	11011	CHM13 Default 5% Error	LBLP01014618.1	971	80271	+	99.91	88.55
NM_001284333.1	11011	CHM13 Default 5% Error	LBLP01012998.1	32871	35059	+	99.71	6.34
NM_007270.4	11328	CHM13 Default 5% Error	LBLP01014750.1	1190922	1204335	-	99.86	65.37
NM_007270.4	11328	CHM13 Default 5% Error	LBLP01014753.1	4884	10904	-	99.12	19.59
NM_001284341.1	11328	CHM13 Default 5% Error	LBLP01014750.1	1190922	1204335	-	99.86	62.5
NM_001284341.1	11328	CHM13 Default 5% Error	LBLP01014753.1	4884	22066	-	99.04	23.02
NM_001284343.1	11328	CHM13 Default 5% Error	LBLP01014750.1	1190922	1203309	-	99.86	83.88
NM_001284343.1	11328	CHM13 Default 5% Error	LBLP01014753.1	4884	5966	-	98.01	11.15
NM_002457.3	4583	CHM13 Default 5% Error	LBLP01015093.1	2295460	2313890	-	93.95	68.05
NM_002457.3	4583	CHM13 Default 5% Error	LBLP01001732.1	999	15776	-	99.32	23.49
NM_017820.4	54932	CHM13 Default 5% Error	LBLP01014493.1	25366	102796	-	99.77	76.01
NM_017820.4	54932	CHM13 Default 5% Error	LBLP01014492.1	24277214	24294848	-	100	22.02
NM_001026383.2	79741	CHM13 Default 5% Error	LBLP01000835.1	2857	24413	+	96.92	27.95
NM_001026383.2	79741	CHM13 Default 5% Error	LBLP01006484.1	16726	114923	-	99.73	76.54
NM_145023.5	79741	CHM13 Default 5% Error	LBLP01000835.1	2857	24413	+	97.03	24.37
NM_145023.5	79741	CHM13 Default 5% Error	LBLP01006484.1	16726	114923	-	99.77	79.03
NM_001037984.2	124565	CHM13 Default 5% Error	LBLP01015111.1	1739415	1782563	+	100	52.15
NM_001037984.2	124565	CHM13 Default 5% Error	LBLP01000890.1	3225	5473	+	99.75	45.05
NM_001288833.1	2678	CHM13 Default 5% Error	LBLP01008425.1	352791	373407	+	100	67.61
NM_001288833.1	2678	CHM13 Default 5% Error	LBLP01014620.1	28109	33339	-	98.43	37.71
NM_013421.2	2678	CHM13 Default 5% Error	LBLP01008425.1	352791	373407	+	100	66.73
NM_013421.2	2678	CHM13 Default 5% Error	LBLP01014620.1	28109	33339	-	98.43	38.76
NM_001289117.1	27231	CHM13 Default 5% Error	LBLP01000050.1	2463	3057	-	100	27.31
NM_001289117.1	27231	CHM13 Default 5% Error	LBLP01014171.1	3101027	3103546	-	99.61	45.22
NM_176820.3	338321	CHM13 Default 5% Error	LBLP01015086.1	312	23715	-	99.96	72.64
NM_176820.3	338321	CHM13 Default 5% Error	LBLP01015116.1	269	4428	+	100	27.43
NM_001290083.1	199692	CHM13 Default 5% Error	LBLP01014631.1	1671	6306	+	100	87.97
NM_001290083.1	199692	CHM13 Default 5% Error	LBLP01000022.1	2816499	2823552	+	88.72	14.93
NM_001290117.1	100652748	CHM13 Default 5% Error	LBLP01001551.1	1907	3749	+	99.89	73.2
NM_001290117.1	100652748	CHM13 Default 5% Error	LBLP01001548.1	2919	9270	+	100	13.85
NM_001101663.4	200030	CHM13 Default 5% Error	LBLP01014035.1	13055	47093	-	98.87	89.5
NM_001101663.4	200030	CHM13 Default 5% Error	LBLP01014039.1	1036	10038	-	97.19	10.92
NM_183372.5	200030	CHM13 Default 5% Error	LBLP01014035.1	13055	47093	-	98.87	78.14
NM_183372.5	200030	CHM13 Default 5% Error	LBLP01014039.1	1036	18050	-	97.76	13.62
NM_001290224.1	7179	CHM13 Default 5% Error	LBLP01014432.1	5152	20965	+	99.48	54.07
NM_001290224.1	7179	CHM13 Default 5% Error	LBLP01014418.1	35724	84799	+	99.67	36.6
NM_199261.3	7179	CHM13 Default 5% Error	LBLP01014432.1	5152	20965	+	99.48	48.67
NM_199261.3	7179	CHM13 Default 5% Error	LBLP01014418.1	35724	84799	+	99.74	42.92
NM_199260.3	7179	CHM13 Default 5% Error	LBLP01014432.1	5152	20965	+	99.48	50.77
NM_199260.3	7179	CHM13 Default 5% Error	LBLP01014418.1	35724	84799	+	99.72	40.47
NM_199259.3	7179	CHM13 Default 5% Error	LBLP01014432.1	5152	20965	+	99.48	49.64
NM_199259.3	7179	CHM13 Default 5% Error	LBLP01014418.1	35724	84799	+	99.73	41.79
NM_130797.3	1804	CHM13 Default 5% Error	LBLP01014150.1	269313	743389	+	99.22	87.88
NM_130797.3	1804	CHM13 Default 5% Error	LBLP01001667.1	24894	25548	-	99.23	13.53
NM_001039350.2	1804	CHM13 Default 5% Error	LBLP01014150.1	295376	743389	+	99.54	86.73
NM_001039350.2	1804	CHM13 Default 5% Error	LBLP01013647.1	183234	183873	+	99.84	13.3
NM_001290253.1	1804	CHM13 Default 5% Error	LBLP01014150.1	269313	438078	+	99.02	71.02
NM_001290253.1	1804	CHM13 Default 5% Error	LBLP01001667.1	24902	25548	-	99.84	31.31
NM_000947.4	5558	CHM13 Default 5% Error	LBLP01015141.1	6795	15229	-	99.82	24.07
NM_000947.4	5558	CHM13 Default 5% Error	LBLP01001825.1	13930	52378	-	98.65	44.86
NM_000947.4	5558	CHM13 Default 5% Error	LBLP01015130.1	946	19285	-	94.72	13.56
NM_001276343.2	119016	CHM13 Default 5% Error	LBLP01004376.1	105	6768	+	99.68	75.61
NM_001276343.2	119016	CHM13 Default 5% Error	LBLP01000447.1	2185	18274	-	99.39	26.15
NM_001291379.1	119016	CHM13 Default 5% Error	LBLP01004376.1	943	6768	+	99.73	69.83
NM_001291379.1	119016	CHM13 Default 5% Error	LBLP01000447.1	2185	24650	-	98.47	31.37
NM_133446.3	119016	CHM13 Default 5% Error	LBLP01004376.1	105	6768	+	99.68	77.75
NM_133446.3	119016	CHM13 Default 5% Error	LBLP01000447.1	2185	18274	-	99.32	24.07
NM_016245.4	51170	CHM13 Default 5% Error	LBLP01013978.1	6646917	6667814	-	99.81	58.2
NM_016245.4	51170	CHM13 Default 5% Error	LBLP01013982.1	2152	36182	-	99.67	48.76
NM_152286.4	375775	CHM13 Default 5% Error	LBLP01014493.1	138974	180853	-	99.93	62.91
NM_152286.4	375775	CHM13 Default 5% Error	LBLP01001808.1	601917	646849	+	100	33.95
NM_001098537.2	375775	CHM13 Default 5% Error	LBLP01014493.1	138974	180853	-	99.93	61.93
NM_001098537.2	375775	CHM13 Default 5% Error	LBLP01001808.1	601917	646849	+	100	34.97
NM_001145440.2	441250	CHM13 Default 5% Error	LBLP01004514.1	28843	30057	+	100	38.48
NM_001145440.2	441250	CHM13 Default 5% Error	LBLP01004508.1	1264041	1369102	+	98.23	42.6
NM_001145440.2	441250	CHM13 Default 5% Error	LBLP01004513.1	9988	58642	+	96.11	14.44
NM_001145440.2	441250	CHM13 Default 5% Error	LBLP01001864.1	10963	23284	-	99.64	8.92
NM_016931.4	50507	CHM13 Default 5% Error	LBLP01013755.1	14758	45488	+	99.24	67.45
NM_016931.4	50507	CHM13 Default 5% Error	LBLP01000040.1	98736	190324	+	99.85	31.24
NM_001143836.2	50507	CHM13 Default 5% Error	LBLP01013755.1	14758	45488	+	99.31	66.55
NM_001143836.2	50507	CHM13 Default 5% Error	LBLP01000040.1	98736	190326	+	99.78	32.15
NM_001291926.1	50507	CHM13 Default 5% Error	LBLP01013755.1	14758	45488	+	99.24	67.51
NM_001291926.1	50507	CHM13 Default 5% Error	LBLP01000040.1	98736	190324	+	99.85	31.17
NM_001291927.1	50507	CHM13 Default 5% Error	LBLP01013755.1	14758	45488	+	99.24	71.46
NM_001291927.1	50507	CHM13 Default 5% Error	LBLP01000040.1	99324	190324	+	99.65	27.15
NM_001291929.1	50507	CHM13 Default 5% Error	LBLP01013755.1	14758	45488	+	99.24	72.97
NM_001291929.1	50507	CHM13 Default 5% Error	LBLP01000040.1	99564	190324	+	100	25.61
NM_032351.5	84311	CHM13 Default 5% Error	LBLP01001064.1	164654	181269	-	99.91	69.32
NM_032351.5	84311	CHM13 Default 5% Error	LBLP01001543.1	43785	46230	+	99.8	30.37
NM_001278279.2	84311	CHM13 Default 5% Error	LBLP01001064.1	164654	181269	-	99.9	66.36
NM_001278279.2	84311	CHM13 Default 5% Error	LBLP01001543.1	43785	46230	+	99.8	33.26
NM_000842.4	2915	CHM13 Default 5% Error	LBLP01013628.1	10588172	10933852	-	99.94	86.77
NM_000842.4	2915	CHM13 Default 5% Error	LBLP01013763.1	43976	80675	+	96.38	14.54
NM_001292009.1	346007	CHM13 Default 5% Error	LBLP01000034.1	17583	1600971	+	99.96	78.39
NM_001292009.1	346007	CHM13 Default 5% Error	LBLP01000011.1	20301973	20671935	+	100	21.62
NM_182543.3	221078	CHM13 Default 5% Error	LBLP01006484.1	13919445	13985175	+	99.85	52.8
NM_182543.3	221078	CHM13 Default 5% Error	LBLP01013275.1	5255	12039	+	99.26	47.31
NM_001300995.1	50507	CHM13 Default 5% Error	LBLP01013755.1	14758	45488	+	99.31	71.09
NM_001300995.1	50507	CHM13 Default 5% Error	LBLP01000040.1	98081	190326	+	99.82	27.52
NM_015326.4	23380	CHM13 Default 5% Error	LBLP01014050.1	4936	53484	+	99.79	71.9
NM_015326.4	23380	CHM13 Default 5% Error	LBLP01014048.1	2003	25353	+	95.68	14.98
NM_015326.4	23380	CHM13 Default 5% Error	LBLP01014045.1	52416	123696	+	98.26	10.98
NM_001170637.3	23380	CHM13 Default 5% Error	LBLP01014050.1	4936	53484	+	99.79	71.93
NM_001170637.3	23380	CHM13 Default 5% Error	LBLP01014048.1	2003	25353	+	95.67	14.94
NM_001170637.3	23380	CHM13 Default 5% Error	LBLP01014045.1	52416	123696	+	98.26	10.98
NM_001300952.1	23380	CHM13 Default 5% Error	LBLP01014050.1	4936	45210	+	100	61.46
NM_001300952.1	23380	CHM13 Default 5% Error	LBLP01014048.1	2003	25353	+	95.67	20.6
NM_001300952.1	23380	CHM13 Default 5% Error	LBLP01014045.1	52416	123696	+	98.26	15.14
NM_024848.2	79906	CHM13 Default 5% Error	LBLP01001443.1	265551	320824	+	100	79.06
NM_024848.2	79906	CHM13 Default 5% Error	LBLP01001050.1	1480318	1483212	-	99.73	20.46
NM_001302371.1	100132406	CHM13 Default 5% Error	LBLP01013023.1	73	31926	-	98.37	42.3
NM_001302371.1	100132406	CHM13 Default 5% Error	LBLP01014772.1	2605	22703	+	96.53	20.69
NM_001302371.1	100132406	CHM13 Default 5% Error	LBLP01014528.1	581	6221	-	95.09	9.03
NM_014695.2	9720	CHM13 Default 5% Error	LBLP01014714.1	12798	43371	-	99.69	50.8
NM_014695.2	9720	CHM13 Default 5% Error	LBLP01014713.1	1701654	1715241	-	99.83	40.85
NM_014695.2	9720	CHM13 Default 5% Error	LBLP01014715.1	10778	13502	-	99.79	8.45
NM_000868.3	3358	CHM13 Default 5% Error	LBLP01015402.1	13767	89943	+	99.36	78.78
NM_000868.3	3358	CHM13 Default 5% Error	LBLP01014085.1	99280	246812	-	99.9	22.55
NM_001256760.2	3358	CHM13 Default 5% Error	LBLP01015402.1	27861	89943	+	99.51	76.45
NM_001256760.2	3358	CHM13 Default 5% Error	LBLP01014085.1	99280	246812	-	99.91	24
NM_001256761.2	3358	CHM13 Default 5% Error	LBLP01015402.1	13767	89943	+	99.47	77.96
NM_001256761.2	3358	CHM13 Default 5% Error	LBLP01014085.1	99280	246812	-	99.9	23.01
NM_001304548.1	286464	CHM13 Default 5% Error	LBLP01014740.1	7387	247468	-	100	60.34
NM_001304548.1	286464	CHM13 Default 5% Error	LBLP01014104.1	1254	224107	+	99.22	40.27
NM_018401.2	55351	CHM13 Default 5% Error	LBLP01013417.1	3986	58314	+	99.84	74.13
NM_018401.2	55351	CHM13 Default 5% Error	LBLP01013415.1	810573	1175801	+	100	25.75
NM_001306082.1	55351	CHM13 Default 5% Error	LBLP01013417.1	3986	58314	+	99.84	71.87
NM_001306082.1	55351	CHM13 Default 5% Error	LBLP01013415.1	810573	1175801	+	100	28
NM_001308117.1	54715	CHM13 Default 5% Error	LBLP01013675.1	91273	750469	+	100	81.71
NM_001308117.1	54715	CHM13 Default 5% Error	LBLP01013693.1	3455594	4090783	+	100	18.52
NM_002847.4	5799	CHM13 Default 5% Error	LBLP01013949.1	628820	1232912	-	99.94	78.46
NM_002847.4	5799	CHM13 Default 5% Error	LBLP01013950.1	21241	444169	-	99.8	21.48
NM_130842.3	5799	CHM13 Default 5% Error	LBLP01013949.1	628820	1232912	-	99.94	79.29
NM_130842.3	5799	CHM13 Default 5% Error	LBLP01013950.1	21241	444169	-	99.79	20.65
NM_130843.3	5799	CHM13 Default 5% Error	LBLP01013949.1	628820	1232912	-	99.94	78.06
NM_130843.3	5799	CHM13 Default 5% Error	LBLP01013950.1	21241	444169	-	99.8	21.87
NM_001308267.1	5799	CHM13 Default 5% Error	LBLP01013949.1	628820	1232912	-	99.94	80.35
NM_001308267.1	5799	CHM13 Default 5% Error	LBLP01013950.1	21241	444169	-	99.78	19.59
NM_001308268.1	5799	CHM13 Default 5% Error	LBLP01013949.1	628820	1232912	-	99.94	76.78
NM_001308268.1	5799	CHM13 Default 5% Error	LBLP01013950.1	21241	398141	-	99.82	23.16
NM_001310154.1	400986	CHM13 Default 5% Error	LBLP01014381.1	1589	40089	+	93.8	38.94
NM_001310154.1	400986	CHM13 Default 5% Error	LBLP01000392.1	1800	44984	-	99.48	31.3
NM_001310154.1	400986	CHM13 Default 5% Error	LBLP01001248.1	1172	38540	+	98.22	24.39
NM_001310154.1	400986	CHM13 Default 5% Error	LBLP01014414.1	1265	15272	-	99.29	6.99
NR_002473.2	440354	CHM13 Default 5% Error	LBLP01002134.1	745	26729	+	97.03	81.85
NR_002473.2	440354	CHM13 Default 5% Error	LBLP01002124.1	14159	20242	+	97.64	12.95
NR_002453.4	595101	CHM13 Default 5% Error	LBLP01002134.1	746	26729	+	96.97	73.63
NR_002453.4	595101	CHM13 Default 5% Error	LBLP01002121.1	1633690	1664014	+	99.58	16.69
NR_002793.1	220115	CHM13 Default 5% Error	LBLP01001046.1	1048	26904	+	100	41.64
NR_002793.1	220115	CHM13 Default 5% Error	LBLP01013780.1	11175954	11231655	-	98.78	34.55
NR_002793.1	220115	CHM13 Default 5% Error	LBLP01013782.1	3011	14703	-	98.78	21.92
NR_003569.1	653190	CHM13 Default 5% Error	LBLP01001861.1	11146	18333	-	99.94	69.86
NR_003569.1	653190	CHM13 Default 5% Error	LBLP01004233.1	23901	27804	-	99	18.24
NR_003610.1	283970	CHM13 Default 5% Error	LBLP01001695.1	2266	8749	+	99.01	46.22
NR_003610.1	283970	CHM13 Default 5% Error	LBLP01013385.1	47122	131298	+	96.87	58.42
NR_003613.1	5379	CHM13 Default 5% Error	LBLP01013685.1	2086414	2097033	+	99.9	70.75
NR_003613.1	5379	CHM13 Default 5% Error	LBLP01013672.1	2114138	2114582	-	100	29.31
NR_003670.1	654466	CHM13 Default 5% Error	LBLP01014224.1	61302	66441	-	99.95	86.04
NR_003670.1	654466	CHM13 Default 5% Error	LBLP01014024.1	4183	4849	+	98.5	14.12
NR_015367.2	550643	CHM13 Default 5% Error	LBLP01001556.1	1224155	1227070	+	100	61.21
NR_015367.2	550643	CHM13 Default 5% Error	LBLP01001559.1	41049	54493	+	94.37	46.1
NR_023380.1	348254	CHM13 Default 5% Error	LBLP01014714.1	12798	43371	-	98.85	70.24
NR_023380.1	348254	CHM13 Default 5% Error	LBLP01014713.1	1703021	1715241	-	99.27	16.5
NR_023380.1	348254	CHM13 Default 5% Error	LBLP01014715.1	6548	13568	-	95.73	14.41
NR_003369.2	653390	CHM13 Default 5% Error	LBLP01001729.1	14179	43513	+	99.88	71.01
NR_003369.2	653390	CHM13 Default 5% Error	LBLP01013393.1	165155	168772	-	97.81	28.58
NR_002824.3	400322	CHM13 Default 5% Error	LBLP01001316.1	11640	55165	+	99.25	76.6
NR_002824.3	400322	CHM13 Default 5% Error	LBLP01014637.1	185020	188510	-	97.36	15.45
NR_002824.3	400322	CHM13 Default 5% Error	LBLP01001509.1	13373	35906	-	99.7	5.54
NR_015421.1	154761	CHM13 Default 5% Error	LBLP01000372.1	11991	39201	-	98.89	75.22
NR_015421.1	154761	CHM13 Default 5% Error	LBLP01000370.1	877	8221	+	99.45	28.11
NR_024397.1	728190	CHM13 Default 5% Error	LBLP01000790.1	866	8401	-	99.34	37.1
NR_024397.1	728190	CHM13 Default 5% Error	LBLP01000942.1	5488	25064	-	97.42	60.84
NR_024420.1	389634	CHM13 Default 5% Error	LBLP01014805.1	3507	3993	-	99.58	71.4
NR_024420.1	389634	CHM13 Default 5% Error	LBLP01001045.1	3082	3260	-	98.88	27.03
NR_026558.1	441432	CHM13 Default 5% Error	LBLP01014187.1	12588	22681	+	100	77.73
NR_026558.1	441432	CHM13 Default 5% Error	LBLP01015469.1	16194	17399	+	99.15	21.09
NR_026789.1	100133172	CHM13 Default 5% Error	LBLP01013316.1	9042	15335	-	99.18	78.7
NR_026789.1	100133172	CHM13 Default 5% Error	LBLP01013312.1	3186	26230	-	97.72	22.7
NR_026846.1	285074	CHM13 Default 5% Error	LBLP01001659.1	4967	27534	-	99.48	71.05
NR_026846.1	285074	CHM13 Default 5% Error	LBLP01003024.1	44034	64784	+	99.68	28.71
NR_026916.1	149992	CHM13 Default 5% Error	LBLP01014902.1	4718	35906	-	98.87	87.37
NR_026916.1	149992	CHM13 Default 5% Error	LBLP01014538.1	9388	15643	-	96	13.13
NR_026950.1	283922	CHM13 Default 5% Error	LBLP01000854.1	3187656	3197492	-	99.41	43.93
NR_026950.1	283922	CHM13 Default 5% Error	LBLP01014602.1	6182	13845	-	95.73	20.11
NR_003660.2	106660613	CHM13 Default 5% Error	LBLP01013560.1	16981	27402	-	98.77	63.37
NR_003660.2	106660613	CHM13 Default 5% Error	LBLP01000639.1	27367	29789	-	100	36.88
NR_027044.1	440040	CHM13 Default 5% Error	LBLP01013777.1	6839	25284	+	99.88	40.58
NR_027044.1	440040	CHM13 Default 5% Error	LBLP01013763.1	41685	85238	+	98.31	49.71
NR_027044.1	440040	CHM13 Default 5% Error	LBLP01013776.1	25530	25787	+	98.85	11.42
NR_027154.1	641298	CHM13 Default 5% Error	LBLP01002134.1	745	27163	+	99.55	76.06
NR_027154.1	641298	CHM13 Default 5% Error	LBLP01002124.1	14127	20242	+	95.37	10.59
NR_027154.1	641298	CHM13 Default 5% Error	LBLP01001614.1	6280	6764	+	100	9.68
NR_027269.1	285961	CHM13 Default 5% Error	LBLP01001630.1	23866	35891	-	97.31	72.17
NR_027269.1	285961	CHM13 Default 5% Error	LBLP01000952.1	4692	4884	+	98.96	28.57
NR_027242.1	146336	CHM13 Default 5% Error	LBLP01000524.1	703088	708457	-	99.46	88.27
NR_027242.1	146336	CHM13 Default 5% Error	LBLP01000062.1	884	4323	-	98.21	13.19
NR_027424.1	100132103	CHM13 Default 5% Error	LBLP01001776.1	8863	24958	-	96.91	60.8
NR_027424.1	100132103	CHM13 Default 5% Error	LBLP01001711.1	10589	11151	+	99.82	39.26
NR_027425.1	100132923	CHM13 Default 5% Error	LBLP01013314.1	12040	18321	-	99.67	56.86
NR_027425.1	100132923	CHM13 Default 5% Error	LBLP01001707.1	4058	33253	+	100	49.67
NR_027768.1	349152	CHM13 Default 5% Error	LBLP01008401.1	3770	21510	+	96.33	8.75
NR_027768.1	349152	CHM13 Default 5% Error	LBLP01004288.1	10890	19645	-	99.45	54.2
NR_027768.1	349152	CHM13 Default 5% Error	LBLP01000310.1	1015	19858	-	96.14	11.3
NR_003561.2	349152	CHM13 Default 5% Error	LBLP01004288.1	10900	19491	-	99.46	55.67
NR_003561.2	349152	CHM13 Default 5% Error	LBLP01000310.1	1015	23579	-	96.4	18.78
NR_028041.1	2918	CHM13 Default 5% Error	LBLP01004288.1	23175663	23507675	-	99.86	60.11
NR_028041.1	2918	CHM13 Default 5% Error	LBLP01013625.1	1235860	1576691	+	100	40.29
NR_028063.1	9648	CHM13 Default 5% Error	LBLP01000925.1	7684	58285	-	99.94	73.2
NR_028063.1	9648	CHM13 Default 5% Error	LBLP01001536.1	2563	4411	+	98.33	26.68
NR_027020.2	554226	CHM13 Default 5% Error	LBLP01014902.1	21612	31298	-	98.78	69.19
NR_027020.2	554226	CHM13 Default 5% Error	LBLP01012540.1	60071	60512	-	100	30.75
NR_029192.1	100133315	CHM13 Default 5% Error	LBLP01001866.1	49864	62227	-	100	71.39
NR_029192.1	100133315	CHM13 Default 5% Error	LBLP01013959.1	6434	18399	+	93.45	38.71
NR_029411.1	100133091	CHM13 Default 5% Error	LBLP01000056.1	3706	40104	+	99.14	78.1
NR_029411.1	100133091	CHM13 Default 5% Error	LBLP01014846.1	24122	26302	-	100	23
NR_029426.1	11039	CHM13 Default 5% Error	LBLP01013560.1	16495	27401	-	98.69	35.35
NR_029426.1	11039	CHM13 Default 5% Error	LBLP01001326.1	27398	30982	+	99.59	50.12
NR_027423.1	100128890	CHM13 Default 5% Error	LBLP01001776.1	8863	24958	-	96.9	60.82
NR_027423.1	100128890	CHM13 Default 5% Error	LBLP01001775.1	1861	8437	-	95.95	41.27
NR_027028.2	728411	CHM13 Default 5% Error	LBLP01015118.1	10539	16424	+	99.77	63.86
NR_027028.2	728411	CHM13 Default 5% Error	LBLP01014428.1	8962423	8964825	-	96.13	36.41
NR_033856.1	644316	CHM13 Default 5% Error	LBLP01001469.1	10945	18092	+	99.77	69.49
NR_033856.1	644316	CHM13 Default 5% Error	LBLP01015346.1	2567	13693	-	99.85	27.44
NR_033942.1	728377	CHM13 Default 5% Error	LBLP01000369.1	5446162	5459719	-	99.85	84.87
NR_033942.1	728377	CHM13 Default 5% Error	LBLP01013602.1	26938460	26958750	+	97.77	17.07
NR_034021.1	11042	CHM13 Default 5% Error	LBLP01015072.1	5997	33184	+	99.21	50.82
NR_034021.1	11042	CHM13 Default 5% Error	LBLP01002285.1	708	15697	+	97.43	39.56
NR_034021.1	11042	CHM13 Default 5% Error	LBLP01014545.1	20345	46810	+	99.18	20.97
NR_036432.1	283755	CHM13 Default 5% Error	LBLP01001316.1	11640	46818	+	99.78	87.6
NR_036432.1	283755	CHM13 Default 5% Error	LBLP01004259.1	37830	66353	-	95.9	9.51
NR_036443.1	440248	CHM13 Default 5% Error	LBLP01001316.1	37529	57346	+	99.49	59.89
NR_036443.1	440248	CHM13 Default 5% Error	LBLP01014637.1	185034	188510	-	97.41	40.24
NR_036447.1	339044	CHM13 Default 5% Error	LBLP01001101.1	11552	32953	+	99.83	85.28
NR_036447.1	339044	CHM13 Default 5% Error	LBLP01002030.1	2226	16708	-	98.54	15.25
NR_036647.1	284047	CHM13 Default 5% Error	LBLP01014713.1	1698770	1715241	-	99.45	59.27
NR_036647.1	284047	CHM13 Default 5% Error	LBLP01014714.1	12798	43371	-	99.42	33.98
NR_036647.1	284047	CHM13 Default 5% Error	LBLP01014715.1	10778	13595	-	97.95	6.72
NR_027145.2	100271835	CHM13 Default 5% Error	LBLP01006693.1	23664	331555	-	99.64	69.68
NR_027145.2	100271835	CHM13 Default 5% Error	LBLP01000922.1	1	25973	-	99.84	40.97
NR_027155.2	100271836	CHM13 Default 5% Error	LBLP01002134.1	745	27163	+	98.9	75.45
NR_027155.2	100271836	CHM13 Default 5% Error	LBLP01002124.1	12168	20242	+	93.93	11.1
NR_027155.2	100271836	CHM13 Default 5% Error	LBLP01001629.1	12209	16745	-	98.45	10.11
NR_037775.1	100529262	CHM13 Default 5% Error	LBLP01015099.1	2324006	2335449	+	100	73.09
NR_037775.1	100529262	CHM13 Default 5% Error	LBLP01015100.1	1990322	1990699	-	100	27.11
NR_037791.1	100529264	CHM13 Default 5% Error	LBLP01015100.1	1978827	1986930	-	100	71.49
NR_037791.1	100529264	CHM13 Default 5% Error	LBLP01015099.1	2326688	2335449	+	100	28.57
NR_037882.1	100533107	CHM13 Default 5% Error	LBLP01000058.1	2637	38102	-	99.07	66.99
NR_037882.1	100533107	CHM13 Default 5% Error	LBLP01000530.1	602732	607061	-	99.84	33.88
NR_038377.1	441058	CHM13 Default 5% Error	LBLP01015048.1	9174	37722	+	100	57.49
NR_038377.1	441058	CHM13 Default 5% Error	LBLP01014847.1	8684	19483	+	99.67	50.7
NR_038958.1	100507412	CHM13 Default 5% Error	LBLP01007792.1	4789	13670	-	99.28	80.74
NR_038958.1	100507412	CHM13 Default 5% Error	LBLP01000413.1	1230	4664	-	99.68	21.22
NR_040091.1	100506990	CHM13 Default 5% Error	LBLP01000422.1	14540	31843	+	98.87	52.58
NR_040091.1	100506990	CHM13 Default 5% Error	LBLP01013367.1	15998799	16030015	-	93.01	50.73
NR_040092.1	100506990	CHM13 Default 5% Error	LBLP01013367.1	15998544	16030015	-	96.48	59.18
NR_040092.1	100506990	CHM13 Default 5% Error	LBLP01013840.1	24132	25110	-	98.97	42.5
NR_040415.1	140849	CHM13 Default 5% Error	LBLP01000530.1	6214	10893	-	99.61	72.33
NR_040415.1	140849	CHM13 Default 5% Error	LBLP01013285.1	26898	27101	-	100	28.21
NR_024054.2	11039	CHM13 Default 5% Error	LBLP01002285.1	21801	32263	-	94.71	40.35
NR_024054.2	11039	CHM13 Default 5% Error	LBLP01013560.1	6082	27401	-	97.87	64.07
NR_002833.2	554236	CHM13 Default 5% Error	LBLP01000307.1	662	47946	+	97.65	48.25
NR_002833.2	554236	CHM13 Default 5% Error	LBLP01001052.1	47283	121815	+	95.68	63.77
NR_047527.1	387628	CHM13 Default 5% Error	LBLP01014697.1	5116	7759	+	99.93	69.97
NR_047527.1	387628	CHM13 Default 5% Error	LBLP01014024.1	4282	7346	+	98.13	26.38
NR_003674.2	387628	CHM13 Default 5% Error	LBLP01014697.1	5116	7759	+	99.93	73.61
NR_003674.2	387628	CHM13 Default 5% Error	LBLP01014024.1	4282	7346	+	97.18	28.22
NR_027436.2	283788	CHM13 Default 5% Error	LBLP01013236.1	3331	37140	-	96.17	84.67
NR_027436.2	283788	CHM13 Default 5% Error	LBLP01014735.1	11107	13457	+	99.65	16.05
NR_047662.2	729732	CHM13 Default 5% Error	LBLP01013854.1	17818	19808	-	99.34	49.94
[truncated: 2,596 more rows]

## Sheet: low_cds_cov
#Transcript accession	GeneID	Assembly	Scaffold accession	Start	End	Strand	% identity	% coverage
NM_001187.1	574	GRCh38	NT_167212.2	242386	244413	-	99.19	61.75
NM_182484.1	85316	GRCh38	NT_029490.5	89205	167288	+	98.68	95.27
NM_138352.1	90378	GRCh38	NT_011295.12	14028417	14030420	-	99.92	80.33
NM_002929.2	6011	GRCh38	NT_024498.13	53	12644	+	99.7	48
NM_002929.2	6011	GRCh38	NT_027140.7	1823838	1828218	+	99.72	52.19
NM_001012709.1	387267	GRCh38	NT_009237.19	1560958	1562138	-	99.57	86.75
NM_001733.4	715	GRCh38	NT_009714.18	1210	7797	-	99.92	52.77
NM_001733.4	715	GRCh38	NT_009759.17	7070209	7072108	-	100	46.8
NM_182705.2	359845	GRCh38	NT_024972.9	379978	385940	-	100	92.99
NM_003890.2	8857	GRCh38	NT_011109.17	12622449	12693752	-	99.6	78.23
NM_001100631.1	653606	GRCh38	NT_032977.10	12419060	12419636	+	97.92	39.9
NM_001122636.1	50614	GRCh38	NT_029419.13	94961120	94968438	-	100	55.2
NM_001122636.1	50614	GRCh38	NT_024477.15	14315	104957	-	98.58	47.31
NM_001143962.1	388743	GRCh38	NT_167186.2	218	56799	-	100	66.87
NM_001143962.1	388743	GRCh38	NT_004487.20	80357022	80373580	-	99.87	33.12
NM_017940.4	55672	GRCh38	NT_032977.10	15976439	16027617	-	99.2	95.57
NM_002457.3	4583	GRCh38	NT_009237.19	1014875	1050508	+	98.3	80.4
NM_006220.2	390502	GRCh38	NT_026437.13	76140115	76143179	-	99.62	78.75
NM_001077693.3	641700	GRCh38	NT_034772.7	89338747	89339367	-	100	43.58
NM_001077693.3	641700	GRCh38	NT_029289.12	943	9084	-	100	55.66
NM_001293739.1	641700	GRCh38	NT_034772.7	89338747	89339367	-	100	34.92
NM_001293739.1	641700	GRCh38	NT_029289.12	943	9084	-	100	64.07
NM_001291281.2	100132074	GRCh38	NT_032977.10	40775943	40797603	+	99.87	92.27
NM_021192.2	3237	CHM1_1.1	NW_004929305.1	27181488	27183737	+	100	95.83
NM_004977.2	3748	CHM1_1.1	NW_004929415.1	22693981	22707817	-	99.93	96.06
NM_005636.3	6759	CHM1_1.1	NW_004929439.1	11113311	11122568	-	97.54	88.33
NM_175729.1	6759	CHM1_1.1	NW_004929439.1	11113311	11122568	-	98.85	87.97
NM_020689.3	57419	CHM1_1.1	NW_004929416.1	19202244	19644077	+	99.83	91.28
NM_182484.1	85316	CHM1_1.1	NW_004929425.1	296944	374987	-	98.68	95.27
NM_138352.1	90378	CHM1_1.1	NW_004929414.1	5463109	5465070	-	99.91	76.99
NM_199357.1	9824	CHM1_1.1	NW_004929398.1	1732794	1780494	+	96.86	78.68
NM_006613.3	10750	CHM1_1.1	NW_004929405.1	18527378	18553772	-	99.74	94.93
NM_002929.2	6011	CHM1_1.1	NW_004929390.1	1817923	1822255	+	99.9	52.09
NM_002929.2	6011	CHM1_1.1	NW_004929391.1	51	12015	+	99.7	48
NM_001005277.1	81399	CHM1_1.1	NW_004929288.1	100078	100665	-	99.82	62.61
NM_001005484.1	79501	CHM1_1.1	NW_004929286.1	59599	60005	+	99.5	44.33
NM_001006943.1	2046	CHM1_1.1	NW_004929289.1	19025053	19045591	+	99.69	88.3
NM_001007524.1	474384	CHM1_1.1	NW_004929448.1	5805815	5806156	+	100	30.64
NM_001007523.1	474383	CHM1_1.1	NW_004929448.1	5805815	5806156	+	100	30.64
NM_012151.3	8263	CHM1_1.1	NW_004929448.1	5805815	5806727	+	99.89	53.64
NM_017797.3	55643	CHM1_1.1	NW_004929412.1	1925030	1982053	-	99.59	95.22
NM_001012709.1	387267	CHM1_1.1	NW_004929378.1	1581126	1582341	-	98.35	88.52
NM_001733.4	715	CHM1_1.1	NW_004929382.1	7126493	7128392	-	100	46.8
NM_001733.4	715	CHM1_1.1	NW_004929383.1	1329	5167	-	99.9	43.46
NM_013452.2	26609	CHM1_1.1	NW_004929438.1	5642603	5644333	+	99.51	84.48
NM_007293.2	720	CHM1_1.1	NW_004929326.1	31891915	31912655	+	99.92	72.33
NM_000651.4	1378	CHM1_1.1	NW_004929294.1	1446020	1591279	+	99.86	86.59
NM_005515.3	3110	CHM1_1.1	NW_004929334.1	2427159	2432845	-	99.94	91.26
NM_004607.2	6902	CHM1_1.1	NW_004929325.1	2607068	2607261	+	93.87	28.27
NM_001042362.2	26095	CHM1_1.1	NW_004929375.1	667707	729447	-	99.74	93.11
NM_001042359.2	26095	CHM1_1.1	NW_004929375.1	667707	729447	-	99.78	94.14
NM_015605.7	26095	CHM1_1.1	NW_004929375.1	667707	758569	-	99.75	96.73
NM_001042357.3	26095	CHM1_1.1	NW_004929375.1	667707	737742	-	99.79	97.26
NM_001042358.3	26095	CHM1_1.1	NW_004929375.1	667707	729447	-	99.78	95.01
NM_001042361.3	26095	CHM1_1.1	NW_004929375.1	667707	729447	-	99.72	93.83
NM_006237.3	5457	CHM1_1.1	NW_004929388.1	60121107	60125483	-	97.04	97.32
NM_153813.2	161882	CHM1_1.1	NW_004929403.1	80627	162187	+	99.56	92.44
NM_003185.3	6874	CHM1_1.1	NW_004929418.1	30745940	30836947	-	99.8	88.02
NM_013233.2	27347	CHM1_1.1	NW_004929305.1	19019968	19313525	-	99.62	97.37
NM_182705.2	359845	CHM1_1.1	NW_004929404.1	288551	294511	-	99.8	92.93
NM_005577.2	4018	CHM1_1.1	NW_004929328.1	65288155	65421920	-	99.79	89.99
NM_001079530.1	653275	CHM1_1.1	NW_004929304.1	21098457	21105211	-	99.16	81.98
NM_004852.2	9480	CHM1_1.1	NW_004929411.1	2894002	2949495	+	99.7	98.64
NM_001005221.2	729759	CHM1_1.1	NW_004929288.1	100078	100665	-	99.82	62.61
NM_001080488.1	390874	CHM1_1.1	NW_004929412.1	1693232	1715046	+	100	76.9
NM_031215.2	81928	CHM1_1.1	NW_004929418.1	31159892	31178558	-	99.83	97.93
NM_001085423.1	284021	CHM1_1.1	NW_004929407.1	37200015	37203208	+	99.84	43.71
NM_001085474.1	646627	CHM1_1.1	NW_004929294.1	42678823	42679278	-	97.4	38.23
NM_007329.2	1755	CHM1_1.1	NW_004929376.1	75244364	75324588	+	99.35	87.71
NM_017579.2	1755	CHM1_1.1	NW_004929376.1	75244364	75324588	+	99.21	87.52
NM_015321.2	23373	CHM1_1.1	NW_004929414.1	10117075	10156457	+	99.94	97.01
NM_001098482.1	23373	CHM1_1.1	NW_004929414.1	10117075	10156457	+	99.94	97.03
NM_001080482.2	389813	CHM1_1.1	NW_004929369.1	521853	524808	+	99.96	92.59
NM_001098612.1	100049587	CHM1_1.1	NW_004929415.1	23995221	24025339	-	95.65	53.19
NM_032450.2	727957	CHM1_1.1	NW_004929340.1	58477436	58578396	+	98.84	38.72
NM_001099661.1	728689	CHM1_1.1	NW_004929400.1	29344042	29366909	-	97.35	78.41
NM_001099697.1	728194	CHM1_1.1	NW_004929329.1	5955403	5999918	-	99.18	93.72
NM_000836.2	2906	CHM1_1.1	NW_004929415.1	20773598	20823444	+	99.95	89.37
NM_001194.3	610	CHM1_1.1	NW_004929412.1	529749	556575	+	99.33	92.16
NM_030761.4	54361	CHM1_1.1	NW_004929289.1	18573291	18593523	-	99.65	95.64
NM_173565.3	222967	CHM1_1.1	NW_004929329.1	6783330	6828017	+	99.67	88.4
NM_001105549.1	55769	CHM1_1.1	NW_004929415.1	24531138	25016729	-	98.65	57.81
NM_001105550.1	55769	CHM1_1.1	NW_004929415.1	24531138	25016729	-	98.62	56.09
NM_001105551.1	55769	CHM1_1.1	NW_004929415.1	24531138	25016729	-	98.64	56.49
NM_001105552.1	55769	CHM1_1.1	NW_004929415.1	24531138	25016729	-	98.53	54.52
NM_020066.4	56776	CHM1_1.1	NW_004929294.1	34032554	34414279	+	99.86	93.71
NM_203304.3	399664	CHM1_1.1	NW_004929412.1	1494942	1518187	-	99.45	96.52
NM_001113738.1	51326	CHM1_1.1	NW_004929407.1	18490016	18497692	+	97.68	92.18
NM_016632.2	51326	CHM1_1.1	NW_004929407.1	37627685	37628232	+	96.79	53.41
NM_001080511.2	154790	CHM1_1.1	NW_004929332.1	77774015	77794985	+	100	93.55
NM_001122636.1	50614	CHM1_1.1	NW_004929386.1	9952333	9959663	-	99.93	55.2
NM_001122636.1	50614	CHM1_1.1	NW_004929387.1	10992	96950	-	99.91	44.62
NM_001002029.3	721	CHM1_1.1	NW_004929326.1	31891915	31912656	+	99.59	72.34
NM_020180.3	56853	CHM1_1.1	NW_004929410.1	16304030	16546410	-	99.97	83.24
NM_001025087.1	56853	CHM1_1.1	NW_004929410.1	16304030	16546410	-	99.97	83.23
NM_001025088.1	56853	CHM1_1.1	NW_004929410.1	16304030	16546410	-	99.97	83.22
NM_001025089.1	56853	CHM1_1.1	NW_004929410.1	16304030	16546410	-	99.96	82.76
NM_014654.3	9672	CHM1_1.1	NW_004929290.1	1315250	1324522	-	99.89	96.34
NM_024927.4	79990	CHM1_1.1	NW_004929407.1	15730210	15739211	-	100	85
NM_001129778.1	400581	CHM1_1.1	NW_004929405.1	18599910	18600429	-	99.03	53.46
NM_001129778.1	400581	CHM1_1.1	NW_004929405.1	18634292	18639610	+	99.69	34.33
NM_173678.2	285966	CHM1_1.1	NW_004929333.1	4105597	4110754	+	97.89	69.89
NM_001130025.1	285966	CHM1_1.1	NW_004929333.1	4105597	4110754	+	97.89	69.56
NM_178314.3	353116	CHM1_1.1	NW_004929386.1	1280079	1290336	-	99.57	26.75
NM_033129.3	85508	CHM1_1.1	NW_004929416.1	582279	596827	-	99.91	98.29
NM_031866.2	8325	CHM1_1.1	NW_004929370.1	35867106	35870322	-	99.1	93.78
NM_005360.4	4094	CHM1_1.1	NW_004929402.1	33246805	33253539	-	99.71	94.14
NM_001031804.2	4094	CHM1_1.1	NW_004929402.1	33246805	33253539	-	99.76	97.73
NM_001134651.1	317649	CHM1_1.1	NW_004929310.1	5458523	5504563	-	99.98	99.22
NM_001135649.1	344167	CHM1_1.1	NW_004929300.1	67569566	67573888	-	100	88.28
NM_005434.4	7851	CHM1_1.1	NW_004929304.1	785875	793758	+	99.63	71.14
NM_005434.4	7851	CHM1_1.1	NW_004929304.1	584091	622900	-	98.2	35.98
NM_146421.2	2944	CHM1_1.1	NW_004929290.1	80170334	80189277	+	96.78	92.73
NM_001143987.1	653149	CHM1_1.1	NW_004929290.1	78737721	78758123	-	99.5	90.59
NM_001143988.1	653149	CHM1_1.1	NW_004929290.1	78737721	78758123	-	99.48	90.21
NM_001143962.1	388743	CHM1_1.1	NW_004929294.1	17491741	17629034	-	99.44	88.25
NM_001144931.1	391322	CHM1_1.1	NW_004929430.1	3711969	3736898	+	93.12	72.82
NM_016836.3	5937	CHM1_1.1	NW_004929305.1	11338549	11433782	-	99.97	87.98
NM_002897.4	5937	CHM1_1.1	NW_004929305.1	11338549	11433782	-	99.97	87.95
NM_001145026.1	374462	CHM1_1.1	NW_004929384.1	42982908	43218698	+	99.81	94.21
NM_001145026.1	374462	CHM1_1.1	NW_004929384.1	42994069	43025155	-	98.39	6.93
NM_001145139.1	100132994	CHM1_1.1	NW_004929443.1	9197923	9252523	-	94.64	62.34
NM_001145140.1	100130361	CHM1_1.1	NW_004929443.1	9197923	9252523	-	94.64	62.34
NM_016379.3	51481	CHM1_1.1	NW_004929438.1	4333958	4335398	-	99.89	93.96
NM_001146336.1	283953	CHM1_1.1	NW_004929400.1	8560041	8562765	-	99.84	68.14
NM_001143989.2	148545	CHM1_1.1	NW_004929290.1	78737357	78758123	-	100	91.63
NM_003007.3	6406	CHM1_1.1	NW_004929418.1	14033387	14035984	+	99.86	89.23
NM_013227.3	176	CHM1_1.1	NW_004929399.1	4421150	4492202	+	99.79	90.32
NM_001135.3	176	CHM1_1.1	NW_004929399.1	4421150	4492202	+	99.79	89.99
NM_001113239.2	28996	CHM1_1.1	NW_004929332.1	77811570	77907640	-	99.7	91.41
NM_001113239.2	28996	CHM1_1.1	NW_004929333.1	11353	73225	-	100	8.46
NM_022740.4	28996	CHM1_1.1	NW_004929332.1	77811570	77907640	-	99.7	91.46
NM_022740.4	28996	CHM1_1.1	NW_004929333.1	11353	73225	-	100	8.42
NM_001078170.2	729857	CHM1_1.1	NW_004929300.1	65963541	66061714	+	98.51	84.8
NM_001190214.1	9677	CHM1_1.1	NW_004929398.1	14768817	14924904	-	99.47	84.01
NM_001130859.2	9677	CHM1_1.1	NW_004929398.1	14768817	14924904	-	99.61	82.99
NM_001130858.2	9677	CHM1_1.1	NW_004929398.1	14768817	14924904	-	99.62	83.22
NM_014659.5	9677	CHM1_1.1	NW_004929398.1	14768817	14919451	-	99.6	82.75
NM_001190764.1	388564	CHM1_1.1	NW_004929415.1	27757556	27762600	-	99.82	88.21
NM_001199142.1	8663	CHM1_1.1	NW_004929400.1	29651601	29698789	+	99.36	62.45
NM_000442.4	5175	CHM1_1.1	NW_004929407.1	37135647	37143728	-	99.75	65.1
NM_144653.4	138151	CHM1_1.1	NW_004929368.1	1806598	1895790	-	99.39	90.86
NM_030801.3	81557	CHM1_1.1	NW_004929441.1	1610246	1905468	+	94.51	43.42
NM_177535.2	81557	CHM1_1.1	NW_004929441.1	1592000	1905468	+	94.15	46.5
NM_177537.2	81557	CHM1_1.1	NW_004929441.1	1592000	1905468	+	94.21	46.74
NM_001242362.1	81557	CHM1_1.1	NW_004929441.1	1610246	1905468	+	94.39	44.1
NM_014138.4	29057	CHM1_1.1	NW_004929442.1	682507	692455	+	99.7	61.1
NM_001242489.1	29057	CHM1_1.1	NW_004929442.1	682990	692455	+	99.64	53.42
NM_001242490.1	29057	CHM1_1.1	NW_004929442.1	682995	692455	+	99.75	58.05
NM_001242491.1	29057	CHM1_1.1	NW_004929442.1	681209	692455	+	99.75	60.12
NM_001242492.1	29057	CHM1_1.1	NW_004929442.1	675494	692455	+	99.68	49.14
NM_001242493.1	29057	CHM1_1.1	NW_004929442.1	682507	692455	+	99.58	52.4
NM_001242494.1	29057	CHM1_1.1	NW_004929442.1	683387	692455	+	98.78	45.68
NM_001242495.1	29057	CHM1_1.1	NW_004929442.1	683387	692455	+	98.62	42.7
NM_001242496.1	29057	CHM1_1.1	NW_004929442.1	683404	692455	+	99.62	47.82
NM_001242497.1	29057	CHM1_1.1	NW_004929442.1	683404	692455	+	99.57	44.76
NM_018406.6	4585	CHM1_1.1	NW_004929312.1	1427237	1492989	-	98.8	93.67
NM_001080529.2	644150	CHM1_1.1	NW_004929329.1	29836374	29946782	+	97.63	97.89
NM_001242823.2	100293534	CHM1_1.1	NW_004929326.1	31924848	31945386	+	99.15	73.72
NM_177536.3	6817	CHM1_1.1	NW_004929400.1	30426486	30462085	+	93.24	56
NM_001144064.2	100129239	CHM1_1.1	NW_004929447.1	2322597	2338899	-	97.03	53.88
NM_001144064.2	100129239	CHM1_1.1	NW_004929447.1	2334344	2334579	+	100	53.88
NM_001244892.1	100133053	CHM1_1.1	NW_004929447.1	2322597	2338899	-	97.03	53.88
NM_001244892.1	100133053	CHM1_1.1	NW_004929447.1	2334344	2334579	+	100	53.88
NM_004522.2	3800	CHM1_1.1	NW_004929305.1	3212	92690	+	99.93	90.11
NM_004522.2	3800	CHM1_1.1	NW_004929304.1	39383106	39437235	+	100	9.87
NM_001252204.1	720	CHM1_1.1	NW_004929326.1	31891915	31912655	+	99.92	71.61
NM_001034832.3	548313	CHM1_1.1	NW_004929439.1	11113311	11122568	-	97.54	87.54
NM_001040612.2	548313	CHM1_1.1	NW_004929439.1	11113311	11122568	-	98.85	87.08
NM_005249.4	2290	CHM1_1.1	NW_004929393.1	10235018	10238135	+	96.57	96.94
NM_021988.5	7335	CHM1_1.1	NW_004929416.1	3281142	3282956	-	94.11	71.31
NM_199144.2	7335	CHM1_1.1	NW_004929416.1	3281142	3282956	-	94.11	73.53
NM_001257393.1	7335	CHM1_1.1	NW_004929416.1	3281142	3282956	-	94.11	77.66
NM_032545.3	55997	CHM1_1.1	NW_004929304.1	21097842	21105108	-	99.59	87.5
NM_001270420.1	55997	CHM1_1.1	NW_004929304.1	21097842	21105108	-	99.65	93.57
NM_006327.3	100287932	CHM1_1.1	NW_004929376.1	2513597	2544757	-	99.72	87.76
NM_001271856.1	160622	CHM1_1.1	NW_004929384.1	14548880	14554264	+	95.95	96.56
NM_001272061.1	728239	CHM1_1.1	NW_004929441.1	1610246	1905468	+	94.39	44.1
NM_001098800.2	728239	CHM1_1.1	NW_004929441.1	1592000	1905468	+	94.21	46.74
NM_001272062.1	728239	CHM1_1.1	NW_004929441.1	1592000	1905468	+	94.15	46.5
NM_001272063.1	728239	CHM1_1.1	NW_004929441.1	1610246	1905468	+	94.51	43.42
NM_001098844.2	653567	CHM1_1.1	NW_004929370.1	17729873	18029797	+	99.36	69.38
NM_002438.3	4360	CHM1_1.1	NW_004929370.1	17791292	17893118	+	99.05	60.74
NM_001277423.1	100996648	CHM1_1.1	NW_004929444.1	25011760	25020379	-	97.67	72.92
NM_001277945.1	55769	CHM1_1.1	NW_004929415.1	24531138	25069019	-	98.69	58.56
NM_001277946.1	55769	CHM1_1.1	NW_004929415.1	24531138	25069019	-	98.51	55.38
NM_001277947.1	55769	CHM1_1.1	NW_004929415.1	24531138	25069019	-	98.65	57.79
NM_001277948.1	55769	CHM1_1.1	NW_004929415.1	24531138	25069019	-	98.65	56.74
NM_001277949.1	55769	CHM1_1.1	NW_004929415.1	24531138	25069019	-	98.63	57.32
NM_001277951.1	55769	CHM1_1.1	NW_004929415.1	24531138	25016729	-	98.38	53.23
NM_001277952.1	55769	CHM1_1.1	NW_004929415.1	24531138	25016729	-	98.63	56.4
NM_003585.4	8447	CHM1_1.1	NW_004929404.1	6004	30168	-	99.9	53.1
NM_178043.2	55132	CHM1_1.1	NW_004929320.1	4425098	4446400	+	90.45	83.3
NM_003147.5	6757	CHM1_1.1	NW_004929442.1	480823	569669	-	96.32	71.61
NM_175698.2	6757	CHM1_1.1	NW_004929442.1	480823	569669	-	97.37	68.49
NM_001278697.1	6757	CHM1_1.1	NW_004929442.1	480823	569669	-	96.97	70.24
NM_173600.2	283463	CHM1_1.1	NW_004929384.1	2930633	3107144	+	99.43	94.33
NM_031308.3	83481	CHM1_1.1	NW_004929340.1	58201062	58214201	-	99.97	49.99
NM_001267574.2	8663	CHM1_1.1	NW_004929400.1	29665307	29698789	+	99.31	54.22
NM_001037808.2	8663	CHM1_1.1	NW_004929400.1	29646766	29698789	+	99	57.48
NM_001286478.1	8663	CHM1_1.1	NW_004929400.1	29677384	29698789	+	99.64	55.37
NM_003752.4	8663	CHM1_1.1	NW_004929400.1	29665307	29698789	+	99.31	56.64
NM_002457.3	4583	CHM1_1.1	NW_004929378.1	1013796	1043732	+	99.39	59.23
NM_173611.3	283742	CHM1_1.1	NW_004929398.1	9689961	9723488	+	98.09	98.35
NM_001288813.1	51326	CHM1_1.1	NW_004929407.1	18532938	18534711	+	99.15	81.65
NM_001288812.1	51326	CHM1_1.1	NW_004929407.1	18544543	18553110	+	99.71	47.2
NM_001288814.1	727957	CHM1_1.1	NW_004929341.1	14228	45135	+	95.09	6.17
NM_001288814.1	727957	CHM1_1.1	NW_004929340.1	58480238	58578396	+	98.77	37.46
NM_001288811.1	51326	CHM1_1.1	NW_004929407.1	18524593	18534711	+	99.08	82.41
NM_001289931.1	255403	CHM1_1.1	NW_004929313.1	144494	147744	+	100	90.45
NM_001039127.5	255403	CHM1_1.1	NW_004929313.1	114195	147744	+	99.79	94.84
NM_001289930.1	255403	CHM1_1.1	NW_004929313.1	114195	147744	+	99.82	95.66
NM_006220.2	390502	CHM1_1.1	NW_004929393.1	75767776	75770844	-	99.81	78.38
NM_001290033.1	26958	CHM1_1.1	NW_004929332.1	68860469	68918236	-	99.4	26.51
NM_001017915.2	3635	CHM1_1.1	NW_004929306.1	1054	63141	+	99.82	76.27
NM_001017915.2	3635	CHM1_1.1	NW_004929305.1	84133995	84204534	+	99.91	22.23
NM_005541.4	3635	CHM1_1.1	NW_004929306.1	1054	63141	+	99.82	76.31
NM_005541.4	3635	CHM1_1.1	NW_004929305.1	84133995	84204534	+	99.91	22.18
NM_012133.5	26958	CHM1_1.1	NW_004929332.1	68710539	68918236	-	98.74	55.47
NM_001290031.1	285141	CHM1_1.1	NW_004929305.1	21837030	21844446	+	99.78	87.73
NM_001290030.1	285141	CHM1_1.1	NW_004929305.1	21837030	21865302	+	99.84	90.77
NM_020979.4	10603	CHM1_1.1	NW_004929332.1	40487534	40523266	+	99.64	88.84
NM_031421.3	83538	CHM1_1.1	NW_004929407.1	14997142	15027957	+	100	91.52
NM_207355.3	102724631	CHM1_1.1	NW_004929394.1	2051929	2083378	-	99.4	94.8
NM_001290095.1	283953	CHM1_1.1	NW_004929400.1	8560041	8560546	-	99.8	62.7
NM_001290097.1	283953	CHM1_1.1	NW_004929400.1	8560041	8562765	-	99.84	71.63
NM_001290098.1	283953	CHM1_1.1	NW_004929400.1	8527986	8528243	-	100	46.15
NM_001290118.1	100652748	CHM1_1.1	NW_004929376.1	2295738	2656043	+	99.84	83.55
NM_001290117.1	100652748	CHM1_1.1	NW_004929376.1	2295738	2656043	+	99.84	78.76
NM_014938.5	22877	CHM1_1.1	NW_004929386.1	31172	51273	+	99.91	93.72
NM_014938.5	22877	CHM1_1.1	NW_004929385.1	13093799	13094337	+	100	6.38
NM_130797.3	1804	CHM1_1.1	NW_004929334.1	58900	313516	+	99.55	78.59
NM_130797.3	1804	CHM1_1.1	NW_004929333.1	14419287	14933785	+	99.51	21.32
NM_001936.4	1804	CHM1_1.1	NW_004929334.1	58900	313516	+	99.55	83.92
NM_001936.4	1804	CHM1_1.1	NW_004929333.1	14672052	14933785	+	100	16.07
NM_001039350.2	1804	CHM1_1.1	NW_004929334.1	58900	313516	+	99.55	78.72
NM_001039350.2	1804	CHM1_1.1	NW_004929333.1	14254043	14933785	+	100	21.27
NM_001290253.1	1804	CHM1_1.1	NW_004929334.1	8723	9708	+	99.79	49
NM_001290253.1	1804	CHM1_1.1	NW_004929333.1	14419287	14933789	+	99.41	49.85
NM_001290252.1	1804	CHM1_1.1	NW_004929334.1	147536	313516	+	99.58	83.43
NM_001290252.1	1804	CHM1_1.1	NW_004929333.1	14672052	14933787	+	99.86	16.61
NM_003868.2	8823	CHM1_1.1	NW_004929444.1	5950	8320	+	99.43	56.89
NM_006865.4	11026	CHM1_1.1	NW_004929415.1	26674417	26691084	-	84.5	62.99
NM_001172654.2	11026	CHM1_1.1	NW_004929415.1	26674417	26691039	-	84.4	69.75
NM_032882.5	84968	CHM1_1.1	NW_004929448.1	3878705	3896589	+	97.39	68.56
NM_001291283.1	646627	CHM1_1.1	NW_004929294.1	42678823	42679278	-	97.4	43.66
NM_001291316.1	284021	CHM1_1.1	NW_004929407.1	37200015	37203208	+	99.84	54.42
NM_018461.4	55844	CHM1_1.1	NW_004929377.1	4981457	5006490	+	99.57	89.49
NM_001291317.1	284021	CHM1_1.1	NW_004929407.1	37200015	37203208	+	99.84	53.73
NM_138322.3	5046	CHM1_1.1	NW_004929399.1	16997912	17104277	-	99.9	96.09
NM_001099289.2	344558	CHM1_1.1	NW_004929304.1	1249	10853	+	99.31	57.24
NM_001099289.2	344558	CHM1_1.1	NW_004929303.1	14419793	14781116	+	100	44.22
NM_033486.2	984	CHM1_1.1	NW_004929288.1	1049261	1069217	-	99.19	91.79
NM_001787.2	984	CHM1_1.1	NW_004929288.1	1049261	1069217	-	99.2	91.89
NM_033489.2	984	CHM1_1.1	NW_004929288.1	1049261	1069217	-	99.2	91.91
NM_001291345.1	984	CHM1_1.1	NW_004929288.1	1049261	1069217	-	99.43	91.84
NM_016458.3	51236	CHM1_1.1	NW_004929340.1	58426019	58477522	+	95.83	25.1
NM_001291529.1	102723631	CHM1_1.1	NW_004929446.1	19139755	19142264	+	98.45	77.61
NM_001291530.1	102723631	CHM1_1.1	NW_004929446.1	19139755	19142264	+	98.45	76.5
NM_001291661.1	201625	CHM1_1.1	NW_004929309.1	57267865	57470169	-	99.92	78.85
NM_001291815.1	256158	CHM1_1.1	NW_004929367.1	366	86761	+	99.87	74.5
NM_001291815.1	256158	CHM1_1.1	NW_004929366.1	62195050	62239032	+	99.57	14.99
NM_020790.1	200958	CHM1_1.1	NW_004929312.1	1294508	1299618	+	98.14	69.94
NM_005960.1	4584	CHM1_1.1	NW_004929332.1	39108715	39172692	+	97.5	22.38
NM_006060.5	10320	CHM1_1.1	NW_004929330.1	33604	62172	+	100	93.2
NM_006060.5	10320	CHM1_1.1	NW_004929329.1	50336556	50359647	+	99.08	6.83
NM_001220765.2	10320	CHM1_1.1	NW_004929330.1	33604	62172	+	100	93.06
NM_001220765.2	10320	CHM1_1.1	NW_004929329.1	50336556	50359643	+	99.76	6.91
NM_001291837.1	10320	CHM1_1.1	NW_004929330.1	33604	62172	+	100	93.47
NM_001291837.1	10320	CHM1_1.1	NW_004929329.1	50340567	50359643	+	100	6.5
NM_001291838.1	10320	CHM1_1.1	NW_004929330.1	39611	62172	+	100	93.33
NM_001291838.1	10320	CHM1_1.1	NW_004929329.1	50340567	50359648	+	99.5	6.7
NM_001220767.2	10320	CHM1_1.1	NW_004929330.1	39610	62172	+	100	96.99
NM_001220768.2	10320	CHM1_1.1	NW_004929330.1	33604	62172	+	100	96.99
NM_001291839.1	10320	CHM1_1.1	NW_004929330.1	39610	62172	+	100	96.39
NM_001220770.2	10320	CHM1_1.1	NW_004929330.1	39610	62172	+	100	96.92
NM_001291840.1	10320	CHM1_1.1	NW_004929330.1	56989	62172	+	100	96.75
NM_001220771.2	10320	CHM1_1.1	NW_004929330.1	33604	62172	+	100	96.9
NM_001291841.1	10320	CHM1_1.1	NW_004929330.1	44415	62172	+	100	96.92
NM_001291842.1	10320	CHM1_1.1	NW_004929330.1	44415	62172	+	100	96.9
NM_001291843.1	10320	CHM1_1.1	NW_004929330.1	48800	62172	+	100	96.83
NM_001291844.1	10320	CHM1_1.1	NW_004929330.1	48800	62172	+	100	96.81
NM_001291845.1	10320	CHM1_1.1	NW_004929329.1	50336556	50359646	+	99.53	22.73
NM_001291845.1	10320	CHM1_1.1	NW_004929330.1	25066	26504	+	99.72	77.07
NM_001291846.1	10320	CHM1_1.1	NW_004929329.1	50336556	50359646	+	99.53	53.47
NM_001291846.1	10320	CHM1_1.1	NW_004929330.1	25066	26899	+	100	46.89
NM_001291847.1	10320	CHM1_1.1	NW_004929329.1	50340567	50359646	+	99.75	51.86
NM_001291847.1	10320	CHM1_1.1	NW_004929330.1	25066	26899	+	100	48.52
NM_001077693.3	641700	CHM1_1.1	NW_004929323.1	47098105	47098725	-	100	43.58
NM_001077693.3	641700	CHM1_1.1	NW_004929324.1	54	5238	-	100	27.68
NM_001293739.1	641700	CHM1_1.1	NW_004929323.1	47098105	47098725	-	100	34.92
NM_001293739.1	641700	CHM1_1.1	NW_004929324.1	54	5238	-	100	31.87
NM_018711.4	55530	CHM1_1.1	NW_004929384.1	71447874	71518427	-	99.81	91.37
NM_001297740.1	6902	CHM1_1.1	NW_004929325.1	2607068	2607261	+	93.87	32.37
NM_001127361.2	127544	CHM1_1.1	NW_004929290.1	3373998	3402337	-	99.92	96.19
NM_001301046.1	147906	CHM1_1.1	NW_004929415.1	19026071	19033169	-	100	96.62
NM_021158.4	57761	CHM1_1.1	NW_004929416.1	301274	301866	+	93.76	23.17
NM_001301201.1	57761	CHM1_1.1	NW_004929416.1	301939	303270	+	99.75	16.65
NM_015201.4	23246	CHM1_1.1	NW_004929340.1	58579320	58581470	-	100	42.56
NM_015201.4	23246	CHM1_1.1	NW_004929341.1	65681	80496	-	99.78	18.91
NM_003631.3	8505	CHM1_1.1	NW_004929376.1	1947929	2286159	-	99.8	60.91
NM_001303486.1	8505	CHM1_1.1	NW_004929376.1	1947929	2286160	-	99.8	67.7
NM_001303487.1	8505	CHM1_1.1	NW_004929376.1	1947929	2283342	-	100	64.45
NM_001303489.1	8505	CHM1_1.1	NW_004929376.1	1948041	2052387	-	100	82.39
NM_004505.3	9098	CHM1_1.1	NW_004929405.1	18018193	18048197	-	95.39	41.23
NM_001304284.1	9098	CHM1_1.1	NW_004929405.1	20017339	20090470	-	89.72	19.66
NM_001304359.1	4586	CHM1_1.1	NW_004929378.1	1090471	1161279	+	99.88	34.02
NM_001305424.1	56776	CHM1_1.1	NW_004929294.1	34032554	34414279	+	99.86	93.72
NM_006236.2	5455	CHM1_1.1	NW_004929303.1	10145495	10149643	+	100	90.25
NM_001308304.1	116988	CHM1_1.1	NW_004929333.1	11453296	11490506	+	100	91.78
NM_001042535.3	116988	CHM1_1.1	NW_004929333.1	11453296	11490506	+	100	92.33
NM_001291281.2	100132074	CHM1_1.1	NW_004929290.1	11800072	11821731	+	99.91	90.23
NM_001739.1	763	CHM13 CA Conservative 2.5% Error	LBLQ01001011.1	6181437	6198297	-	100	63.74
NM_001739.1	763	CHM13 CA Conservative 2.5% Error	LBLQ01001012.1	8530	24459	-	98.82	38.92
NM_053285.1	83659	CHM13 CA Conservative 2.5% Error	LBLQ01002049.1	453506	472431	+	99.89	67.5
NM_053285.1	83659	CHM13 CA Conservative 2.5% Error	LBLQ01001746.1	8813	9778	+	99.77	32.13
NM_139320.1	89832	CHM13 CA Conservative 2.5% Error	LBLQ01002907.1	445288	461064	+	99.68	77.29
NM_139320.1	89832	CHM13 CA Conservative 2.5% Error	LBLQ01002912.1	195773	209091	-	100	22.6
NM_153696.2	219595	CHM13 CA Conservative 2.5% Error	LBLQ01000754.1	2652	40065	+	99.52	83.63
NM_017990.3	55066	CHM13 CA Conservative 2.5% Error	LBLQ01000454.1	22100	54607	-	99.79	83.52
NM_017990.3	55066	CHM13 CA Conservative 2.5% Error	LBLQ01003693.1	2900	19554	+	98.35	19.58
NM_182481.1	85318	CHM13 CA Conservative 2.5% Error	LBLQ01001934.1	7233	44726	-	98.15	82.97
NM_182481.1	85318	CHM13 CA Conservative 2.5% Error	LBLQ01002752.1	21896	23283	+	98.21	17.55
NM_182973.1	360200	CHM13 CA Conservative 2.5% Error	LBLQ01009528.1	130	28485	-	100	64.55
NM_182973.1	360200	CHM13 CA Conservative 2.5% Error	LBLQ01002530.1	1004245	1008485	-	99.82	35.66
NM_012173.3	26260	CHM13 CA Conservative 2.5% Error	LBLQ01002463.1	14185	34086	+	99.66	74.96
NM_012173.3	26260	CHM13 CA Conservative 2.5% Error	LBLQ01002435.1	4781	33801	-	97.75	25.08
NM_183420.1	26260	CHM13 CA Conservative 2.5% Error	LBLQ01002463.1	14185	34086	+	99.66	73.41
NM_183420.1	26260	CHM13 CA Conservative 2.5% Error	LBLQ01002435.1	4781	33801	-	97.92	26.57
NM_183421.1	26260	CHM13 CA Conservative 2.5% Error	LBLQ01002463.1	14185	34086	+	99.66	73.71
NM_183421.1	26260	CHM13 CA Conservative 2.5% Error	LBLQ01002435.1	4781	33801	-	97.92	26.29
NM_016522.2	50863	CHM13 CA Conservative 2.5% Error	LBLQ01002786.1	17264	422491	-	99.87	47.32
NM_016522.2	50863	CHM13 CA Conservative 2.5% Error	LBLQ01002784.1	2751768	2753544	-	100	52.65
NM_173550.2	203238	CHM13 CA Conservative 2.5% Error	LBLQ01005300.1	22848	347480	+	99.69	74.78
NM_173550.2	203238	CHM13 CA Conservative 2.5% Error	LBLQ01000221.1	9293	79597	-	100	26.1
NM_033515.2	93663	CHM13 CA Conservative 2.5% Error	LBLQ01000668.1	4785158	4826914	-	100	74.99
NM_033515.2	93663	CHM13 CA Conservative 2.5% Error	LBLQ01000998.1	5721	91865	-	99.13	26.26
NM_015368.3	24145	CHM13 CA Conservative 2.5% Error	LBLQ01002826.1	49426	77813	-	99.85	76.2
NM_015368.3	24145	CHM13 CA Conservative 2.5% Error	LBLQ01002827.1	4666	29480	-	99.01	25.26
NM_152540.3	152579	CHM13 CA Conservative 2.5% Error	LBLQ01000477.1	320536	761695	-	99.56	64.51
NM_152540.3	152579	CHM13 CA Conservative 2.5% Error	LBLQ01000479.1	20801	34279	-	99.91	35.61
NM_004818.2	9416	CHM13 CA Conservative 2.5% Error	LBLQ01001887.1	15806	26161	-	99.68	87.38
NM_006733.2	2491	CHM13 CA Conservative 2.5% Error	LBLQ01001166.1	1208506	1265701	-	97.7	77.83
NM_006733.2	2491	CHM13 CA Conservative 2.5% Error	LBLQ01001168.1	6537	9140	-	99.84	24.69
NM_018268.2	55255	CHM13 CA Conservative 2.5% Error	LBLQ01001072.1	2187817	2220388	-	99.9	82.48
NM_018268.2	55255	CHM13 CA Conservative 2.5% Error	LBLQ01001073.1	21274	24325	-	100	17.4
NM_003852.3	8805	CHM13 CA Conservative 2.5% Error	LBLQ01001455.1	675402	731823	-	100	71.99
NM_003852.3	8805	CHM13 CA Conservative 2.5% Error	LBLQ01001456.1	1866	70814	-	99.91	31.01
NM_015905.2	8805	CHM13 CA Conservative 2.5% Error	LBLQ01001455.1	675402	731823	-	100	72.7
NM_015905.2	8805	CHM13 CA Conservative 2.5% Error	LBLQ01001456.1	1866	70814	-	99.91	30.22
NM_033547.3	92105	CHM13 CA Conservative 2.5% Error	LBLQ01001255.1	6665	56548	+	100	62.11
NM_033547.3	92105	CHM13 CA Conservative 2.5% Error	LBLQ01001252.1	9644940	9700922	+	99.74	37.68
NM_006613.3	10750	CHM13 CA Conservative 2.5% Error	LBLQ01004326.1	188968	204370	-	99.94	86.57
NM_001002920.1	340441	CHM13 CA Conservative 2.5% Error	LBLQ01000457.1	7662	19978	-	99.15	44.72
NM_001002920.1	340441	CHM13 CA Conservative 2.5% Error	LBLQ01002175.1	10709	32044	+	98.57	42
NM_001002920.1	340441	CHM13 CA Conservative 2.5% Error	LBLQ01002173.1	9423	12160	+	100	15.61
NM_007081.2	11158	CHM13 CA Conservative 2.5% Error	LBLQ01003546.1	93319	103814	-	99.83	85.52
NM_001003789.1	11158	CHM13 CA Conservative 2.5% Error	LBLQ01003546.1	93319	103814	-	99.83	85.38
NM_001003811.1	56159	CHM13 CA Conservative 2.5% Error	LBLQ01002695.1	321326	629949	-	99.25	80.85
NM_001003811.1	56159	CHM13 CA Conservative 2.5% Error	LBLQ01002698.1	6649	62369	-	95.55	24.97
NM_031276.2	56159	CHM13 CA Conservative 2.5% Error	LBLQ01002695.1	321326	625988	-	99.95	79.78
NM_031276.2	56159	CHM13 CA Conservative 2.5% Error	LBLQ01002698.1	6649	62369	-	94.75	21.95
NM_001004325.1	440021	CHM13 CA Conservative 2.5% Error	LBLQ01002998.1	400429	401516	+	100	97.31
NM_001004696.1	127074	CHM13 CA Conservative 2.5% Error	LBLQ01000896.1	285824	286788	+	98.44	91.97
NM_002826.4	5768	CHM13 CA Conservative 2.5% Error	LBLQ01000933.1	1083153	1105868	-	99.96	86.73
NM_002826.4	5768	CHM13 CA Conservative 2.5% Error	LBLQ01000934.1	6049	17806	-	100	13.29
NM_001004128.2	5768	CHM13 CA Conservative 2.5% Error	LBLQ01000933.1	1083153	1105868	-	99.95	82.96
NM_001004128.2	5768	CHM13 CA Conservative 2.5% Error	LBLQ01000934.1	6049	17806	-	100	17.07
NM_001005365.2	340441	CHM13 CA Conservative 2.5% Error	LBLQ01000457.1	7662	19978	-	99.27	48.58
NM_001005365.2	340441	CHM13 CA Conservative 2.5% Error	LBLQ01002175.1	10709	32044	+	98.57	39.06
NM_001005365.2	340441	CHM13 CA Conservative 2.5% Error	LBLQ01002173.1	8108	12160	+	95.53	16.75
NM_007194.3	11200	CHM13 CA Conservative 2.5% Error	LBLQ01009806.1	252	46579	-	100	71.48
NM_145862.2	11200	CHM13 CA Conservative 2.5% Error	LBLQ01009806.1	252	46579	-	100	70.08
NM_001005735.1	11200	CHM13 CA Conservative 2.5% Error	LBLQ01009806.1	252	46579	-	100	73.32
NM_001006932.1	6196	CHM13 CA Conservative 2.5% Error	LBLQ01002085.1	1044287	1174232	-	99.9	95.86
NM_001006943.1	2046	CHM13 CA Conservative 2.5% Error	LBLQ01000351.1	2687	5831	+	99.66	48.89
NM_020526.3	2046	CHM13 CA Conservative 2.5% Error	LBLQ01000351.1	2687	19720	+	97.56	80.04
NM_020371.2	57099	CHM13 CA Conservative 2.5% Error	LBLQ01001791.1	3164408	3301944	+	100	78.96
NM_015622.5	51622	CHM13 CA Conservative 2.5% Error	LBLQ01001881.1	4930	19249	-	99.71	56.97
NM_001001872.2	145407	CHM13 CA Conservative 2.5% Error	LBLQ01005041.1	23717401	23795268	+	99.08	73.88
NM_001001872.2	145407	CHM13 CA Conservative 2.5% Error	LBLQ01004044.1	6436	41588	+	96.61	33.32
NM_018945.3	27115	CHM13 CA Conservative 2.5% Error	LBLQ01000350.1	24448	72697	+	99.75	91.73
NM_018945.3	27115	CHM13 CA Conservative 2.5% Error	LBLQ01001001.1	4610598	4867558	+	100	8.74
NM_001009905.1	146712	CHM13 CA Conservative 2.5% Error	LBLQ01002756.1	366693	388712	-	99.88	62.54
NM_001009905.1	146712	CHM13 CA Conservative 2.5% Error	LBLQ01002760.1	23434	67549	-	98.06	33.33
NM_003550.2	8379	CHM13 CA Conservative 2.5% Error	LBLQ01001123.1	630031	829335	-	99.91	44.52
NM_003550.2	8379	CHM13 CA Conservative 2.5% Error	LBLQ01001125.1	34232	197801	-	99.93	55.26
NM_001013836.1	8379	CHM13 CA Conservative 2.5% Error	LBLQ01001123.1	630031	829335	-	99.91	45.13
NM_001013836.1	8379	CHM13 CA Conservative 2.5% Error	LBLQ01001125.1	34232	197801	-	99.93	54.65
NM_001013837.1	8379	CHM13 CA Conservative 2.5% Error	LBLQ01001123.1	630031	829335	-	99.91	45.18
NM_001013837.1	8379	CHM13 CA Conservative 2.5% Error	LBLQ01001125.1	34232	197801	-	99.93	54.6
NM_013452.2	26609	CHM13 CA Conservative 2.5% Error	LBLQ01003152.1	13286	15107	-	99	93.79
NM_021965.3	5239	CHM13 CA Conservative 2.5% Error	LBLQ01000427.1	1670799	1762042	-	98.81	65.45
NM_021965.3	5239	CHM13 CA Conservative 2.5% Error	LBLQ01000428.1	22907	58495	-	99.07	38.46
NM_002777.3	5657	CHM13 CA Conservative 2.5% Error	LBLQ01008903.1	109747	111792	-	99.03	62.03
NM_014326.3	23604	CHM13 CA Conservative 2.5% Error	LBLQ01002050.1	24522	56853	+	99.86	82.03
NM_014326.3	23604	CHM13 CA Conservative 2.5% Error	LBLQ01000730.1	8174	83112	-	99.59	18.56
NM_144672.3	146183	CHM13 CA Conservative 2.5% Error	LBLQ01000961.1	192987	259513	+	99.85	76.54
NM_005054.2	84220	CHM13 CA Conservative 2.5% Error	LBLQ01001739.1	976546	1057056	-	97.43	71.52
NM_005054.2	84220	CHM13 CA Conservative 2.5% Error	LBLQ01001307.1	1	20320	+	97.02	39.73
NM_000651.4	1378	CHM13 CA Conservative 2.5% Error	LBLQ01002296.1	1086880	1213943	+	99.82	86.54
NM_001848.2	1291	CHM13 CA Conservative 2.5% Error	LBLQ01006824.1	708858	713582	-	99.87	55.69
NM_001848.2	1291	CHM13 CA Conservative 2.5% Error	LBLQ01002321.1	8	11400	-	99.92	32.14
NM_001031748.2	283461	CHM13 CA Conservative 2.5% Error	LBLQ01004880.1	1882809	1948821	+	99.93	56.52
NM_001031748.2	283461	CHM13 CA Conservative 2.5% Error	LBLQ01004049.1	16333	21491	+	100	43.42
NM_000632.3	3684	CHM13 CA Conservative 2.5% Error	LBLQ01002140.1	634860	670270	-	99.51	69.92
NM_000632.3	3684	CHM13 CA Conservative 2.5% Error	LBLQ01002143.1	9510	26609	-	100	27.68
NM_001039841.1	89839	CHM13 CA Conservative 2.5% Error	LBLQ01004576.1	60627	69322	-	100	73.05
NM_001039841.1	89839	CHM13 CA Conservative 2.5% Error	LBLQ01001723.1	1105	5214	-	97.99	32.91
NM_173683.3	286046	CHM13 CA Conservative 2.5% Error	LBLQ01000239.1	2436273	2464965	-	99.83	79.12
NM_173683.3	286046	CHM13 CA Conservative 2.5% Error	LBLQ01003470.1	2421	279164	-	100	26.34
NM_182931.2	55904	CHM13 CA Conservative 2.5% Error	LBLQ01001183.1	2544242	2582264	-	100	81.62
NM_018682.3	55904	CHM13 CA Conservative 2.5% Error	LBLQ01001183.1	2544242	2582264	-	100	83.42
NM_170606.2	58508	CHM13 CA Conservative 2.5% Error	LBLQ01004563.1	1837524	1926714	-	99.85	79.92
NM_170606.2	58508	CHM13 CA Conservative 2.5% Error	LBLQ01010111.1	1868	27854	+	100	9.98
NM_170606.2	58508	CHM13 CA Conservative 2.5% Error	LBLQ01001936.1	24004	150058	-	100	6.33
NM_170606.2	58508	CHM13 CA Conservative 2.5% Error	LBLQ01003689.1	1695	10577	-	95.1	2.71
NM_001003795.2	389524	CHM13 CA Conservative 2.5% Error	LBLQ01001085.1	3723	32645	+	99.8	87.3
NM_016950.2	50859	CHM13 CA Conservative 2.5% Error	LBLQ01000613.1	163915	185255	-	99.71	71.26
NM_016950.2	50859	CHM13 CA Conservative 2.5% Error	LBLQ01000617.1	3695	469768	-	96.84	33.69
NM_001040159.1	50859	CHM13 CA Conservative 2.5% Error	LBLQ01000613.1	163915	185255	-	99.71	71.47
NM_001040159.1	50859	CHM13 CA Conservative 2.5% Error	LBLQ01000617.1	3695	469768	-	96.81	33.48
NM_173812.4	283417	CHM13 CA Conservative 2.5% Error	LBLQ01000248.1	5088308	5153534	-	99.76	73.42
NM_173812.4	283417	CHM13 CA Conservative 2.5% Error	LBLQ01000994.1	5319	49662	-	93.14	31.74
NM_004607.2	6902	CHM13 CA Conservative 2.5% Error	LBLQ01000318.1	2298305	2298498	+	93.87	28.27
NM_144563.2	22934	CHM13 CA Conservative 2.5% Error	LBLQ01002544.1	26879	45492	+	99.78	76.33
NM_144563.2	22934	CHM13 CA Conservative 2.5% Error	LBLQ01002543.1	711888	718774	+	100	21.1
NM_032558.2	84641	CHM13 CA Conservative 2.5% Error	LBLQ01002896.1	39509	85266	+	99.55	88.38
NM_032558.2	84641	CHM13 CA Conservative 2.5% Error	LBLQ01002154.1	31729	32105	+	100	11.38
NM_001854.3	1301	CHM13 CA Conservative 2.5% Error	LBLQ01010121.1	16823	171617	+	99.93	86.73
NM_001854.3	1301	CHM13 CA Conservative 2.5% Error	LBLQ01001277.1	25185	59050	-	100	13.3
NM_080629.2	1301	CHM13 CA Conservative 2.5% Error	LBLQ01010121.1	16823	171617	+	99.93	86.8
NM_080629.2	1301	CHM13 CA Conservative 2.5% Error	LBLQ01001277.1	25185	59050	-	100	13.23
NM_006080.2	10371	CHM13 CA Conservative 2.5% Error	LBLQ01000797.1	727	102936	+	99.87	86.55
NM_006080.2	10371	CHM13 CA Conservative 2.5% Error	LBLQ01005963.1	5947930	6086430	+	98.65	14.4
NM_001042367.1	283677	CHM13 CA Conservative 2.5% Error	LBLQ01000737.1	417740	437269	-	99.54	70.51
NM_001042367.1	283677	CHM13 CA Conservative 2.5% Error	LBLQ01000738.1	35530	66295	-	99.3	30.49
NM_001042365.2	26095	CHM13 CA Conservative 2.5% Error	LBLQ01002012.1	21748	24173	+	99.53	91.51
NM_001042362.2	26095	CHM13 CA Conservative 2.5% Error	LBLQ01002012.1	21748	24173	+	99.53	83.09
NM_001042359.2	26095	CHM13 CA Conservative 2.5% Error	LBLQ01002012.1	9190	24173	+	99.94	78.76
NM_021016.3	5671	CHM13 CA Conservative 2.5% Error	LBLQ01000110.1	4331	15751	+	100	70.54
NM_021016.3	5671	CHM13 CA Conservative 2.5% Error	LBLQ01003766.1	68005	69808	+	99.3	29.76
NM_014812.2	9859	CHM13 CA Conservative 2.5% Error	LBLQ01000892.1	1	76228	-	98.68	74.56
NM_014812.2	9859	CHM13 CA Conservative 2.5% Error	LBLQ01000894.1	2885	59209	-	99.71	14.4
NM_014812.2	9859	CHM13 CA Conservative 2.5% Error	LBLQ01001504.1	17120	17987	-	98.28	12.07
NM_001042404.1	9859	CHM13 CA Conservative 2.5% Error	LBLQ01000892.1	1	76228	-	98.61	73.48
NM_001042404.1	9859	CHM13 CA Conservative 2.5% Error	LBLQ01000894.1	2885	59209	-	99.71	15.02
NM_001042404.1	9859	CHM13 CA Conservative 2.5% Error	LBLQ01001504.1	17120	17987	-	98.28	12.58
NM_001042405.1	9859	CHM13 CA Conservative 2.5% Error	LBLQ01000892.1	1	76228	-	98.69	73.18
NM_001042405.1	9859	CHM13 CA Conservative 2.5% Error	LBLQ01000894.1	2885	59209	-	99.71	15.19
NM_001042405.1	9859	CHM13 CA Conservative 2.5% Error	LBLQ01001504.1	17120	17987	-	98.28	12.73
NM_015605.7	26095	CHM13 CA Conservative 2.5% Error	LBLQ01002012.1	626	24173	+	98.88	72.31
NM_001042357.3	26095	CHM13 CA Conservative 2.5% Error	LBLQ01002012.1	6081	24173	+	99.95	76.18
NM_001042358.3	26095	CHM13 CA Conservative 2.5% Error	LBLQ01002012.1	6081	24173	+	99.95	78.71
NM_001042361.3	26095	CHM13 CA Conservative 2.5% Error	LBLQ01002012.1	21739	24173	+	99.3	74.77
NM_001042363.3	26095	CHM13 CA Conservative 2.5% Error	LBLQ01002012.1	6081	24173	+	99.95	78.65
NM_001042364.3	26095	CHM13 CA Conservative 2.5% Error	LBLQ01002012.1	21739	24173	+	99.3	77.89
NM_004514.3	3607	CHM13 CA Conservative 2.5% Error	LBLQ01002756.1	378	26228	+	99.64	75.69
NM_004514.3	3607	CHM13 CA Conservative 2.5% Error	LBLQ01005969.1	3420	69639	-	99.94	33.2
NM_153813.2	161882	CHM13 CA Conservative 2.5% Error	LBLQ01002106.1	1616	40412	+	99.19	92.31
NM_153717.2	2121	CHM13 CA Conservative 2.5% Error	LBLQ01002819.1	3130293	3161062	-	99.87	73.12
NM_153717.2	2121	CHM13 CA Conservative 2.5% Error	LBLQ01008874.1	1499005	1544180	+	99.71	27.18
NM_003369.3	7405	CHM13 CA Conservative 2.5% Error	LBLQ01001255.1	1794611	1955443	-	99.97	81.8
NM_003369.3	7405	CHM13 CA Conservative 2.5% Error	LBLQ01001256.1	12000	158405	-	100	18.19
NM_000540.2	6261	CHM13 CA Conservative 2.5% Error	LBLQ01008613.1	3111	119192	+	99.52	75.33
NM_000540.2	6261	CHM13 CA Conservative 2.5% Error	LBLQ01002883.1	721	34860	-	99.85	22.81
NM_001042723.1	6261	CHM13 CA Conservative 2.5% Error	LBLQ01008613.1	3111	119192	+	99.52	75.31
NM_001042723.1	6261	CHM13 CA Conservative 2.5% Error	LBLQ01002883.1	721	34860	-	99.85	22.84
NM_032119.3	84059	CHM13 CA Conservative 2.5% Error	LBLQ01000257.1	5902	276155	-	99.98	86.42
NM_032119.3	84059	CHM13 CA Conservative 2.5% Error	LBLQ01001047.1	991	341820	+	99.9	15.75
NM_001043352.1	7170	CHM13 CA Conservative 2.5% Error	LBLQ01000003.1	1252887	1269310	+	94.42	53.09
NM_001043353.1	7170	CHM13 CA Conservative 2.5% Error	LBLQ01000003.1	1252887	1269310	+	92.96	52.94
NM_001048209.1	50863	CHM13 CA Conservative 2.5% Error	LBLQ01002786.1	17264	964190	-	99.84	41.56
NM_001048209.1	50863	CHM13 CA Conservative 2.5% Error	LBLQ01002784.1	2751768	2753544	-	100	58.41
NM_052997.2	91074	CHM13 CA Conservative 2.5% Error	LBLQ01000838.1	3429	55334	-	99.87	55.43
NM_052997.2	91074	CHM13 CA Conservative 2.5% Error	LBLQ01001395.1	181	56551	+	99.83	56.14
NM_022773.2	64788	CHM13 CA Conservative 2.5% Error	LBLQ01003196.1	94527	115533	-	99.76	65.46
NM_022773.2	64788	CHM13 CA Conservative 2.5% Error	LBLQ01003197.1	1	100691	-	98.94	42.97
NM_145297.3	199777	CHM13 CA Conservative 2.5% Error	LBLQ01001442.1	1585206	1600261	-	86.55	32.62
NM_002742.2	5587	CHM13 CA Conservative 2.5% Error	LBLQ01000032.1	58708	207904	+	99.96	87.95
NM_002742.2	5587	CHM13 CA Conservative 2.5% Error	LBLQ01001643.1	149988	150434	-	99.77	12.15
NM_007287.2	4311	CHM13 CA Conservative 2.5% Error	LBLQ01000977.1	6611	75375	+	100	94.85
NM_000902.3	4311	CHM13 CA Conservative 2.5% Error	LBLQ01000977.1	6611	75375	+	100	94.45
NM_007288.2	4311	CHM13 CA Conservative 2.5% Error	LBLQ01000977.1	6611	75375	+	100	94.08
NM_007289.2	4311	CHM13 CA Conservative 2.5% Error	LBLQ01000977.1	6611	75375	+	100	93.34
NM_033655.3	79937	CHM13 CA Conservative 2.5% Error	LBLQ01001682.1	211	60811	+	98.75	59.45
NM_033655.3	79937	CHM13 CA Conservative 2.5% Error	LBLQ01001680.1	21095	81502	+	98.65	32.62
NM_033655.3	79937	CHM13 CA Conservative 2.5% Error	LBLQ01003229.1	5571	26969	+	99.08	8.37
NM_005224.2	1820	CHM13 CA Conservative 2.5% Error	LBLQ01002587.1	187449	200179	-	99.72	65.28
NM_005224.2	1820	CHM13 CA Conservative 2.5% Error	LBLQ01008903.1	18565	25277	-	99.59	34.89
NM_002113.2	3078	CHM13 CA Conservative 2.5% Error	LBLQ01002289.1	3014749	3018801	+	98.14	58.05
NM_001079673.1	22862	CHM13 CA Conservative 2.5% Error	LBLQ01002796.1	3017157	3059694	-	100	79.6
NM_001079673.1	22862	CHM13 CA Conservative 2.5% Error	LBLQ01000033.1	12579	182614	-	100	20.33
NM_022892.1	4671	CHM13 CA Conservative 2.5% Error	LBLQ01002228.1	4055	23529	+	99.15	81.63
NM_022892.1	4671	CHM13 CA Conservative 2.5% Error	LBLQ01002229.1	6817850	6844171	+	99.25	18.11
NM_004536.2	4671	CHM13 CA Conservative 2.5% Error	LBLQ01002228.1	4055	23529	+	99.15	73.27
NM_004536.2	4671	CHM13 CA Conservative 2.5% Error	LBLQ01002229.1	6817850	6844171	+	99.48	26.49
NM_001079802.1	2218	CHM13 CA Conservative 2.5% Error	LBLQ01000283.1	148700	193230	-	99.97	95.72
NM_001079802.1	2218	CHM13 CA Conservative 2.5% Error	LBLQ01000284.1	3	38498	-	99.73	5.1
NM_006731.2	2218	CHM13 CA Conservative 2.5% Error	LBLQ01000283.1	148700	193230	-	99.97	96.91
NM_006731.2	2218	CHM13 CA Conservative 2.5% Error	LBLQ01000284.1	3	38498	-	100	3.92
NM_018491.3	55871	CHM13 CA Conservative 2.5% Error	LBLQ01002765.1	919	43985	-	99.15	68.83
NM_018491.3	55871	CHM13 CA Conservative 2.5% Error	LBLQ01002552.1	3214	18652	-	99.16	34.42
NM_198455.2	23145	CHM13 CA Conservative 2.5% Error	LBLQ01006265.1	1076468	1121982	+	99.81	81.54
NM_198455.2	23145	CHM13 CA Conservative 2.5% Error	LBLQ01006837.1	23	7915	+	99.92	8.58
NM_001083538.1	445582	CHM13 CA Conservative 2.5% Error	LBLQ01003358.1	68424	101070	+	94.73	88.4
NM_001083538.1	445582	CHM13 CA Conservative 2.5% Error	LBLQ01004119.1	5091	13737	-	91.12	12
NM_017757.2	55628	CHM13 CA Conservative 2.5% Error	LBLQ01007238.1	114728	124887	-	99.91	60.68
NM_017757.2	55628	CHM13 CA Conservative 2.5% Error	LBLQ01003165.1	14535	306270	+	99.59	39.84
NM_022065.4	63892	CHM13 CA Conservative 2.5% Error	LBLQ01000620.1	12531865	12576123	+	100	50.32
NM_001083953.1	63892	CHM13 CA Conservative 2.5% Error	LBLQ01000620.1	12531937	12576123	+	100	51.98
NM_001039590.2	8239	CHM13 CA Conservative 2.5% Error	LBLQ01000746.1	1910460	2049987	+	99.77	62.22
NM_001039590.2	8239	CHM13 CA Conservative 2.5% Error	LBLQ01000748.1	1258	8267	+	98.33	37.65
NM_001039591.2	8239	CHM13 CA Conservative 2.5% Error	LBLQ01000746.1	1910460	2049987	+	99.77	62.47
NM_001039591.2	8239	CHM13 CA Conservative 2.5% Error	LBLQ01000748.1	1258	8267	+	98.42	37.44
NM_001084393.1	100037417	CHM13 CA Conservative 2.5% Error	LBLQ01002914.1	4258815	4269215	-	99.16	80.73
NM_001085457.1	644019	CHM13 CA Conservative 2.5% Error	LBLQ01002765.1	923	43985	-	99.32	68.76
NM_001085457.1	644019	CHM13 CA Conservative 2.5% Error	LBLQ01002552.1	1645	18652	-	98.58	36.88
NM_001097612.1	653519	CHM13 CA Conservative 2.5% Error	LBLQ01000678.1	570	23853	+	99.79	49.84
NM_001097612.1	653519	CHM13 CA Conservative 2.5% Error	LBLQ01000677.1	2715	25757	+	99.71	35.73
NM_016334.3	51463	CHM13 CA Conservative 2.5% Error	LBLQ01002371.1	615	24273	+	99.91	54.86
NM_016334.3	51463	CHM13 CA Conservative 2.5% Error	LBLQ01000679.1	213	49800	+	99.5	47.11
NM_014551.4	29781	CHM13 CA Conservative 2.5% Error	LBLQ01003545.1	7647	10965	+	100	84
NM_007329.2	1755	CHM13 CA Conservative 2.5% Error	LBLQ01001391.1	236531	298784	-	99.94	75.17
NM_017579.2	1755	CHM13 CA Conservative 2.5% Error	LBLQ01001391.1	236531	298784	-	99.79	75.66
NM_170678.2	27231	CHM13 CA Conservative 2.5% Error	LBLQ01002528.1	1312	1906	-	100	27.67
NM_170678.2	27231	CHM13 CA Conservative 2.5% Error	LBLQ01001573.1	944	3477	+	98.12	47.06
NM_152440.4	144577	CHM13 CA Conservative 2.5% Error	LBLQ01007240.1	7315	9336	+	100	77.76
NM_152440.4	144577	CHM13 CA Conservative 2.5% Error	LBLQ01000252.1	1006	26622	-	95.75	26.71
NM_152563.2	55199	CHM13 CA Conservative 2.5% Error	LBLQ01007509.1	28371	39849	-	99.73	94.62
NM_018172.2	55199	CHM13 CA Conservative 2.5% Error	LBLQ01007509.1	28371	39849	-	99.75	94.88
NM_001099653.1	55199	CHM13 CA Conservative 2.5% Error	LBLQ01007509.1	28371	39849	-	99.74	94.83
NM_020823.1	57583	CHM13 CA Conservative 2.5% Error	LBLQ01001236.1	9437	39652	+	100	83.06
NM_020823.1	57583	CHM13 CA Conservative 2.5% Error	LBLQ01004564.1	1762	39495	-	100	10.76
NM_020823.1	57583	CHM13 CA Conservative 2.5% Error	LBLQ01001234.1	758239	795529	+	99.26	9.96
NM_174981.3	317754	CHM13 CA Conservative 2.5% Error	LBLQ01002053.1	1396	22062	-	98.07	73.43
NM_182482.2	85319	CHM13 CA Conservative 2.5% Error	LBLQ01001934.1	7233	44726	-	98.85	82.97
NM_182482.2	85319	CHM13 CA Conservative 2.5% Error	LBLQ01002752.1	21896	33510	+	98.57	18.5
NM_194318.3	145173	CHM13 CA Conservative 2.5% Error	LBLQ01009812.1	257384	305177	-	99.96	77.22
NM_194318.3	145173	CHM13 CA Conservative 2.5% Error	LBLQ01001471.1	933577	1020413	+	99.91	27.81
NM_001100631.1	653606	CHM13 CA Conservative 2.5% Error	LBLQ01001060.1	92548	93808	+	99.65	60.51
NM_175918.3	285464	CHM13 CA Conservative 2.5% Error	LBLQ01002615.1	350117	354104	-	99.89	89.66
NM_017414.3	11274	CHM13 CA Conservative 2.5% Error	LBLQ01002467.1	95	17334	+	99.61	76.09
NM_020892.2	113878	CHM13 CA Conservative 2.5% Error	LBLQ01000301.1	22787	39579	-	99.92	48.17
NM_020892.2	113878	CHM13 CA Conservative 2.5% Error	LBLQ01000307.1	3032	24998	+	99.59	43.13
NM_020892.2	113878	CHM13 CA Conservative 2.5% Error	LBLQ01009197.1	2593	4647	-	100	12.27
NM_001102594.1	113878	CHM13 CA Conservative 2.5% Error	LBLQ01000301.1	22787	39579	-	99.92	50.31
NM_001102594.1	113878	CHM13 CA Conservative 2.5% Error	LBLQ01000307.1	13138	24998	+	99.63	40.55
NM_001102594.1	113878	CHM13 CA Conservative 2.5% Error	LBLQ01009197.1	2594	4647	-	100	12.78
NM_001102595.1	113878	CHM13 CA Conservative 2.5% Error	LBLQ01000301.1	22787	39579	-	99.92	53.59
NM_001102595.1	113878	CHM13 CA Conservative 2.5% Error	LBLQ01000307.1	9191	24998	+	98.53	45.29
NM_001102596.1	113878	CHM13 CA Conservative 2.5% Error	LBLQ01000301.1	22787	39579	-	99.91	57.35
NM_001102596.1	113878	CHM13 CA Conservative 2.5% Error	LBLQ01000307.1	13227	24996	+	99.7	47.24
NM_138420.2	113146	CHM13 CA Conservative 2.5% Error	LBLQ01010131.1	4790354	4829461	-	99.68	89.19
NM_001103154.1	100506084	CHM13 CA Conservative 2.5% Error	LBLQ01002301.1	35208	44144	-	100	75.61
NM_001103154.1	100506084	CHM13 CA Conservative 2.5% Error	LBLQ01002736.1	59715	59835	-	100	24.79
NM_021259.2	58986	CHM13 CA Conservative 2.5% Error	LBLQ01003194.1	18	5173	-	100	20.92
NM_021259.2	58986	CHM13 CA Conservative 2.5% Error	LBLQ01003431.1	1	742	+	100	20.29
NM_006382.3	374286	CHM13 CA Conservative 2.5% Error	LBLQ01001153.1	2210	2799	+	97.45	21.31
NM_006382.3	374286	CHM13 CA Conservative 2.5% Error	LBLQ01001772.1	27904	58092	-	99.18	79.42
NM_002783.2	5676	CHM13 CA Conservative 2.5% Error	LBLQ01008984.1	75596	81184	-	100	73.89
NM_006310.3	9520	CHM13 CA Conservative 2.5% Error	LBLQ01000494.1	12371057	12415029	-	99.33	85.89
NM_006310.3	9520	CHM13 CA Conservative 2.5% Error	LBLQ01004859.1	4829	20022	-	99.11	12.9
NM_145025.4	221264	CHM13 CA Conservative 2.5% Error	LBLQ01000849.1	1568	9333	+	99.93	61.21
NM_145025.4	221264	CHM13 CA Conservative 2.5% Error	LBLQ01001158.1	6316	56072	-	97.92	41.12
NM_015236.4	23284	CHM13 CA Conservative 2.5% Error	LBLQ01000935.1	19918	447125	+	99.72	93.58
NM_015236.4	23284	CHM13 CA Conservative 2.5% Error	LBLQ01000482.1	132337	222674	+	100	7.19
NM_018291.3	55277	CHM13 CA Conservative 2.5% Error	LBLQ01000289.1	41685	299048	-	100	54.92
NM_018291.3	55277	CHM13 CA Conservative 2.5% Error	LBLQ01000287.1	2949951	3054760	-	97.8	31.33
NM_018291.3	55277	CHM13 CA Conservative 2.5% Error	LBLQ01000288.1	20041	50614	-	99.69	15.91
NM_001113411.1	55277	CHM13 CA Conservative 2.5% Error	LBLQ01000289.1	41685	299048	-	100	53.04
NM_001113411.1	55277	CHM13 CA Conservative 2.5% Error	LBLQ01000287.1	2949951	3054760	-	97.51	30.53
NM_001113411.1	55277	CHM13 CA Conservative 2.5% Error	LBLQ01000288.1	3470	50614	-	98.32	19.79
NM_152636.2	196074	CHM13 CA Conservative 2.5% Error	LBLQ01000248.1	587985	592560	-	90.64	90.05
NM_001113738.1	51326	CHM13 CA Conservative 2.5% Error	LBLQ01002023.1	32767	40443	-	97.7	92.18
NM_016632.2	51326	CHM13 CA Conservative 2.5% Error	LBLQ01001765.1	6343	16667	+	96.87	59.41
NM_001122636.1	50614	CHM13 CA Conservative 2.5% Error	LBLQ01001272.1	551343	558692	-	99.79	55.2
NM_001122636.1	50614	CHM13 CA Conservative 2.5% Error	LBLQ01003019.1	17641	46430	-	99.86	26.97
NM_001122636.1	50614	CHM13 CA Conservative 2.5% Error	LBLQ01008659.1	19396	19750	-	100	13.24
NM_002547.2	4983	CHM13 CA Conservative 2.5% Error	LBLQ01002899.1	13874	185526	+	99.86	89.74
NM_001303.3	1352	CHM13 CA Conservative 2.5% Error	LBLQ01001154.1	1332470	1349159	-	99.52	70.01
NM_001303.3	1352	CHM13 CA Conservative 2.5% Error	LBLQ01002048.1	30766	121306	-	99.66	29.8
NM_005143.3	3240	CHM13 CA Conservative 2.5% Error	LBLQ01001004.1	909996	914728	+	100	87.63
NM_032180.2	84140	CHM13 CA Conservative 2.5% Error	LBLQ01005943.1	3892	21411	-	99.76	92.22
NM_000521.3	3074	CHM13 CA Conservative 2.5% Error	LBLQ01001070.1	2296	26896	+	99.92	67.01
NM_014845.5	9896	CHM13 CA Conservative 2.5% Error	LBLQ01001161.1	3165	68669	+	99.82	56.77
NM_014845.5	9896	CHM13 CA Conservative 2.5% Error	LBLQ01001158.1	56081	108631	+	99.85	43.48
NM_001128223.1	100131827	CHM13 CA Conservative 2.5% Error	LBLQ01009751.1	20270	22737	-	98.39	80.08
NM_001128223.1	100131827	CHM13 CA Conservative 2.5% Error	LBLQ01010332.1	16983	18789	-	99.48	12.58
NM_000132.3	2157	CHM13 CA Conservative 2.5% Error	LBLQ01004323.1	18328	144979	-	99.98	72.98
NM_000132.3	2157	CHM13 CA Conservative 2.5% Error	LBLQ01001734.1	261283	288729	-	99.95	26.95
NM_004080.2	1607	CHM13 CA Conservative 2.5% Error	LBLQ01000600.1	120155	153266	+	99.93	65.43
NM_004080.2	1607	CHM13 CA Conservative 2.5% Error	LBLQ01000924.1	15275704	15780716	+	99.95	34.57
NM_145695.2	1607	CHM13 CA Conservative 2.5% Error	LBLQ01000600.1	120155	122335	+	100	31.25
NM_145695.2	1607	CHM13 CA Conservative 2.5% Error	LBLQ01000924.1	15275704	15804528	+	99.25	71.96
NM_002781.3	5673	CHM13 CA Conservative 2.5% Error	LBLQ01003973.1	15207	23609	-	99.81	65.79
NM_002781.3	5673	CHM13 CA Conservative 2.5% Error	LBLQ01010174.1	17945	19743	+	99.11	33.61
NM_001130014.1	5673	CHM13 CA Conservative 2.5% Error	LBLQ01003973.1	15207	23609	-	99.8	64.31
NM_001130014.1	5673	CHM13 CA Conservative 2.5% Error	LBLQ01010174.1	17945	19743	+	99.11	35.04
NM_178558.4	340252	CHM13 CA Conservative 2.5% Error	LBLQ01004422.1	12125118	12125441	+	83.33	10.16
NM_001130022.1	340252	CHM13 CA Conservative 2.5% Error	LBLQ01001514.1	84364	84765	-	85.43	17.08
NM_001130072.1	29924	CHM13 CA Conservative 2.5% Error	LBLQ01008427.1	2135	9039	+	99.64	67.27
NM_013333.3	29924	CHM13 CA Conservative 2.5% Error	LBLQ01008427.1	2135	9039	+	99.68	66.25
NM_001130071.1	29924	CHM13 CA Conservative 2.5% Error	LBLQ01008427.1	2137	9039	+	99.74	54.12
NM_172362.2	3756	CHM13 CA Conservative 2.5% Error	LBLQ01002296.1	4245645	4487686	-	99.82	85.18
NM_172362.2	3756	CHM13 CA Conservative 2.5% Error	LBLQ01000330.1	27980	143208	-	99.83	14.9
NM_002238.3	3756	CHM13 CA Conservative 2.5% Error	LBLQ01002296.1	4245645	4487685	-	99.82	86.03
NM_002238.3	3756	CHM13 CA Conservative 2.5% Error	LBLQ01000330.1	28067	143208	-	100	13.98
NM_001130148.1	84318	CHM13 CA Conservative 2.5% Error	LBLQ01001548.1	6573	20384	+	99.77	78.05
NM_001130148.1	84318	CHM13 CA Conservative 2.5% Error	LBLQ01001547.1	19379	48602	+	97.75	22.99
NM_032358.3	84318	CHM13 CA Conservative 2.5% Error	LBLQ01001548.1	6573	20384	+	99.77	75.39
NM_032358.3	84318	CHM13 CA Conservative 2.5% Error	LBLQ01001547.1	31637	48602	+	98.05	25.6
NM_001130146.1	84318	CHM13 CA Conservative 2.5% Error	LBLQ01001548.1	6573	20384	+	99.77	77.14
NM_001130146.1	84318	CHM13 CA Conservative 2.5% Error	LBLQ01001547.1	31637	48602	+	97.86	23.88
NM_001130147.1	84318	CHM13 CA Conservative 2.5% Error	LBLQ01001548.1	6573	20384	+	99.77	76.25
NM_001130147.1	84318	CHM13 CA Conservative 2.5% Error	LBLQ01001547.1	19379	48602	+	97.96	24.75
NM_001130415.1	81575	CHM13 CA Conservative 2.5% Error	LBLQ01001379.1	4842105	4846657	-	99.8	96.09
NM_001130919.1	11158	CHM13 CA Conservative 2.5% Error	LBLQ01003546.1	93319	103814	-	99.83	85.54
NM_001130920.1	11158	CHM13 CA Conservative 2.5% Error	LBLQ01003546.1	93319	103814	-	99.83	79.74
NM_001130921.1	11158	CHM13 CA Conservative 2.5% Error	LBLQ01003546.1	93319	106324	-	98.92	80.02
NM_001130922.1	11158	CHM13 CA Conservative 2.5% Error	LBLQ01003546.1	93319	103814	-	99.83	85.36
NM_001130923.1	11158	CHM13 CA Conservative 2.5% Error	LBLQ01003546.1	93319	103814	-	99.84	79.97
NM_004061.3	1010	CHM13 CA Conservative 2.5% Error	LBLQ01000502.1	194281	307538	-	98.79	64.18
NM_004061.3	1010	CHM13 CA Conservative 2.5% Error	LBLQ01000511.1	7394	648610	-	100	20.75
NM_004061.3	1010	CHM13 CA Conservative 2.5% Error	LBLQ01000507.1	52222	69885	-	96.88	10.93
NM_004061.3	1010	CHM13 CA Conservative 2.5% Error	LBLQ01001361.1	843	18618	+	95.46	8.53
NM_152653.3	7325	CHM13 CA Conservative 2.5% Error	LBLQ01000563.1	152032	243261	+	100	76.98
NM_152653.3	7325	CHM13 CA Conservative 2.5% Error	LBLQ01000561.1	462986	511328	+	97.11	27.5
NM_198562.2	375341	CHM13 CA Conservative 2.5% Error	LBLQ01009193.1	14074351	14077200	-	100	79.38
NM_017952.5	55037	CHM13 CA Conservative 2.5% Error	LBLQ01006538.1	585181	603640	-	99.73	89.32
NM_017952.5	55037	CHM13 CA Conservative 2.5% Error	LBLQ01001318.1	2075	14948	-	99.18	9.09
NM_022780.3	64795	CHM13 CA Conservative 2.5% Error	LBLQ01006266.1	11805	48840	+	99.87	91.58
NM_022780.3	64795	CHM13 CA Conservative 2.5% Error	LBLQ01000717.1	50295	71076	-	98.94	10.67
NM_052885.3	114134	CHM13 CA Conservative 2.5% Error	LBLQ01004049.1	54604	250982	-	99.86	86.09
NM_052885.3	114134	CHM13 CA Conservative 2.5% Error	LBLQ01000644.1	49008	126566	-	100	13.9
NM_145301.2	201158	CHM13 CA Conservative 2.5% Error	LBLQ01001154.1	39431	40396	+	99.48	59.78
NM_145301.2	201158	CHM13 CA Conservative 2.5% Error	LBLQ01001152.1	3083	20921	+	99.84	39.46
NM_173519.2	157807	CHM13 CA Conservative 2.5% Error	LBLQ01002336.1	30358	32546	+	99.77	62.68
NM_173519.2	157807	CHM13 CA Conservative 2.5% Error	LBLQ01002335.1	4093970	4271556	+	98.69	39.07
NM_001135865.1	100132247	CHM13 CA Conservative 2.5% Error	LBLQ01001389.1	21967	34545	-	99.78	86.27
NM_001135865.1	100132247	CHM13 CA Conservative 2.5% Error	LBLQ01001310.1	315	10693	-	98.87	13.79
NM_001136213.1	23784	CHM13 CA Conservative 2.5% Error	LBLQ01003358.1	68424	99954	+	98.7	93.96
NM_001137671.1	388468	CHM13 CA Conservative 2.5% Error	LBLQ01002053.1	1396	22465	-	97.61	77.88
NM_001137671.1	388468	CHM13 CA Conservative 2.5% Error	LBLQ01003177.1	13687	13942	-	100	11.41
NM_001080825.2	144404	CHM13 CA Conservative 2.5% Error	LBLQ01008579.1	9090	29533	+	99.86	92.09
NM_001080825.2	144404	CHM13 CA Conservative 2.5% Error	LBLQ01008576.1	9894275	9937013	+	99.17	8.04
NM_146421.2	2944	CHM13 CA Conservative 2.5% Error	LBLQ01001332.1	48624	84471	-	96.31	95.9
NM_015092.4	23049	CHM13 CA Conservative 2.5% Error	LBLQ01002582.1	48356	120016	-	99.9	90.75
NM_015092.4	23049	CHM13 CA Conservative 2.5% Error	LBLQ01002144.1	7731	22526	+	97.09	7.46
NM_015092.4	23049	CHM13 CA Conservative 2.5% Error	LBLQ01002486.1	2449639	2450096	+	99.34	2.83
NM_005708.3	10082	CHM13 CA Conservative 2.5% Error	LBLQ01000927.1	50273	912705	+	99.96	88.94
NM_005708.3	10082	CHM13 CA Conservative 2.5% Error	LBLQ01005938.1	277315	278107	-	100	11.14
NM_018676.3	55901	CHM13 CA Conservative 2.5% Error	LBLQ01001509.1	1	28837	-	100	84.87
NM_018676.3	55901	CHM13 CA Conservative 2.5% Error	LBLQ01002796.1	65022	65624	+	97.02	17.99
NM_199263.2	55901	CHM13 CA Conservative 2.5% Error	LBLQ01001509.1	1	28837	-	100	84.12
NM_199263.2	55901	CHM13 CA Conservative 2.5% Error	LBLQ01002796.1	65022	65624	+	97.02	18.89
NM_003156.3	6786	CHM13 CA Conservative 2.5% Error	LBLQ01000218.1	15774	85104	+	99.96	79.29
NM_003156.3	6786	CHM13 CA Conservative 2.5% Error	LBLQ01008445.1	43439	44145	-	100	17.4
NM_001144058.1	50863	CHM13 CA Conservative 2.5% Error	LBLQ01002786.1	1780	422491	-	99.87	47.91
NM_001144058.1	50863	CHM13 CA Conservative 2.5% Error	LBLQ01002784.1	2751768	2758446	-	99.83	53.37
NM_015226.2	23274	CHM13 CA Conservative 2.5% Error	LBLQ01001390.1	1359578	1476428	+	100	34.04
NM_015226.2	23274	CHM13 CA Conservative 2.5% Error	LBLQ01002113.1	39065	54869	+	100	58.38
NM_178563.3	340351	CHM13 CA Conservative 2.5% Error	LBLQ01001457.1	8860	81627	-	99.12	61.09
NM_178563.3	340351	CHM13 CA Conservative 2.5% Error	LBLQ01001456.1	3397333	3473992	-	99.86	40.87
NM_001293.2	1207	CHM13 CA Conservative 2.5% Error	LBLQ01001727.1	433466	451635	+	89.98	52.68
NM_001145029.1	374860	CHM13 CA Conservative 2.5% Error	LBLQ01003304.1	5396	99911	-	99.96	65.06
NM_001145029.1	374860	CHM13 CA Conservative 2.5% Error	LBLQ01003341.1	3067	27514	+	98.19	44.14
NM_153267.4	256691	CHM13 CA Conservative 2.5% Error	LBLQ01000427.1	37992	165030	-	99.95	62.71
NM_153267.4	256691	CHM13 CA Conservative 2.5% Error	LBLQ01003127.1	8868115	8876795	-	99.92	37.36
NM_001145268.1	222234	CHM13 CA Conservative 2.5% Error	LBLQ01000992.1	432	21288	+	98.79	44.02
NM_001145268.1	222234	CHM13 CA Conservative 2.5% Error	LBLQ01000989.1	36360	45357	+	100	39.67
NM_001145268.1	222234	CHM13 CA Conservative 2.5% Error	LBLQ01001505.1	1635	16692	+	99.63	11.97
NM_001145269.1	222234	CHM13 CA Conservative 2.5% Error	LBLQ01000992.1	20353	21288	+	100	49.08
NM_001145269.1	222234	CHM13 CA Conservative 2.5% Error	LBLQ01000989.1	36360	45357	+	100	28.79
NM_001145269.1	222234	CHM13 CA Conservative 2.5% Error	LBLQ01001505.1	1635	16692	+	99.63	14.13
NM_001145355.1	55871	CHM13 CA Conservative 2.5% Error	LBLQ01002765.1	919	43988	-	99.07	65.29
NM_001145355.1	55871	CHM13 CA Conservative 2.5% Error	LBLQ01002552.1	3214	18652	-	99.28	37.92
NM_001145356.1	55871	CHM13 CA Conservative 2.5% Error	LBLQ01002765.1	919	43985	-	99.11	67.76
NM_001145356.1	55871	CHM13 CA Conservative 2.5% Error	LBLQ01002552.1	3214	18652	-	99.16	35.59
NM_001145418.1	23331	CHM13 CA Conservative 2.5% Error	LBLQ01002914.1	13790	199372	+	99.86	90.85
NM_001145418.1	23331	CHM13 CA Conservative 2.5% Error	LBLQ01002913.1	3360	418107	+	99.03	9.59
NM_001145442.1	641455	CHM13 CA Conservative 2.5% Error	LBLQ01003359.1	2989	21321	+	99.87	82.37
NM_001145442.1	641455	CHM13 CA Conservative 2.5% Error	LBLQ01008628.1	8238	20943	+	95.53	17.8
NM_001142800.1	346007	CHM13 CA Conservative 2.5% Error	LBLQ01001067.1	2286816	3869448	-	99.96	78.26
NM_001142800.1	346007	CHM13 CA Conservative 2.5% Error	LBLQ01001069.1	24721	394682	-	100	21.75
NM_001145808.1	3684	CHM13 CA Conservative 2.5% Error	LBLQ01002140.1	634860	670270	-	99.51	69.94
NM_001145808.1	3684	CHM13 CA Conservative 2.5% Error	LBLQ01002143.1	9510	26609	-	100	27.67
NM_001143831.2	2915	CHM13 CA Conservative 2.5% Error	LBLQ01000751.1	860083	1205761	-	99.94	89.12
NM_001143831.2	2915	CHM13 CA Conservative 2.5% Error	LBLQ01008406.1	55013	263146	-	98.01	14.14
NM_001146189.1	55628	CHM13 CA Conservative 2.5% Error	LBLQ01007238.1	114728	124887	-	99.91	83.06
NM_001146189.1	55628	CHM13 CA Conservative 2.5% Error	LBLQ01003165.1	14535	161595	+	99.03	17.67
NM_170692.2	9462	CHM13 CA Conservative 2.5% Error	LBLQ01002309.1	85850	175247	+	99.98	88.78
NM_170692.2	9462	CHM13 CA Conservative 2.5% Error	LBLQ01001366.1	420567	610549	+	99.9	10.04
NM_018842.4	55971	CHM13 CA Conservative 2.5% Error	LBLQ01001961.1	75583	104227	-	99.81	87.02
NM_018842.4	55971	CHM13 CA Conservative 2.5% Error	LBLQ01001962.1	24429	70789	-	99.79	12.98
NM_033103.4	85415	CHM13 CA Conservative 2.5% Error	LBLQ01001301.1	545	73614	-	99.41	48.13
NM_033103.4	85415	CHM13 CA Conservative 2.5% Error	LBLQ01001299.1	3742103	3755498	-	98.99	55.87
NM_172003.3	150472	CHM13 CA Conservative 2.5% Error	LBLQ01002765.1	887	43985	-	99.17	66.66
NM_172003.3	150472	CHM13 CA Conservative 2.5% Error	LBLQ01002552.1	1603	18724	-	97.33	40.77
NM_173569.3	254048	CHM13 CA Conservative 2.5% Error	LBLQ01001454.1	4267465	4314404	-	99.75	93.63
NM_173569.3	254048	CHM13 CA Conservative 2.5% Error	LBLQ01001455.1	5287	25859	-	100	4.58
NM_001160116.1	123207	CHM13 CA Conservative 2.5% Error	LBLQ01002085.1	1222377	1249190	+	97.68	29.52
NM_001160116.1	123207	CHM13 CA Conservative 2.5% Error	LBLQ01000792.1	1476008	1476393	-	86.82	62.35
NM_001145128.2	221264	CHM13 CA Conservative 2.5% Error	LBLQ01000850.1	25471	118694	+	99.93	69.79
NM_001145128.2	221264	CHM13 CA Conservative 2.5% Error	LBLQ01000849.1	1568	30668	+	99.89	14.71
NM_001145128.2	221264	CHM13 CA Conservative 2.5% Error	LBLQ01001158.1	6339	56072	-	99.32	16.26
NM_001161334.1	440689	CHM13 CA Conservative 2.5% Error	LBLQ01002922.1	1	29371	+	98.86	69.86
NM_170664.2	146183	CHM13 CA Conservative 2.5% Error	LBLQ01000961.1	219445	259513	+	99.78	68.72
NM_001161683.1	146183	CHM13 CA Conservative 2.5% Error	LBLQ01000961.1	198905	259513	+	99.84	75.57
NM_014798.2	9842	CHM13 CA Conservative 2.5% Error	LBLQ01002026.1	5242	27805	+	99.73	72.48
NM_014798.2	9842	CHM13 CA Conservative 2.5% Error	LBLQ01002024.1	14860	37169	+	98.91	27.81
NM_007246.3	11275	CHM13 CA Conservative 2.5% Error	LBLQ01000612.1	2769	87176	+	99.88	83.71
NM_007246.3	11275	CHM13 CA Conservative 2.5% Error	LBLQ01000606.1	639403	660704	+	99.61	16.7
NM_001161521.1	11275	CHM13 CA Conservative 2.5% Error	LBLQ01000612.1	2769	87176	+	99.88	87.12
NM_001161521.1	11275	CHM13 CA Conservative 2.5% Error	LBLQ01000606.1	641804	660704	+	99.5	13.3
NM_018837.3	55959	CHM13 CA Conservative 2.5% Error	LBLQ01000907.1	8165	54220	+	99.96	80.66
NM_018837.3	55959	CHM13 CA Conservative 2.5% Error	LBLQ01000906.1	2871911	2921216	+	99.86	19.05
NM_198596.2	55959	CHM13 CA Conservative 2.5% Error	LBLQ01000907.1	8165	54220	+	99.96	74.16
NM_198596.2	55959	CHM13 CA Conservative 2.5% Error	LBLQ01000906.1	2871359	2921216	+	99.81	25.57
NM_001161841.1	55959	CHM13 CA Conservative 2.5% Error	LBLQ01000907.1	8165	54220	+	99.96	74.22
NM_001161841.1	55959	CHM13 CA Conservative 2.5% Error	LBLQ01000906.1	2871359	2921216	+	99.81	25.51
NM_175722.3	7173	CHM13 CA Conservative 2.5% Error	LBLQ01005981.1	4786	109620	-	99.38	83.64
NM_175722.3	7173	CHM13 CA Conservative 2.5% Error	LBLQ01001787.1	17913	20047	+	100	17.26
NM_175721.3	7173	CHM13 CA Conservative 2.5% Error	LBLQ01005981.1	4786	109620	-	99.48	85.8
NM_175721.3	7173	CHM13 CA Conservative 2.5% Error	LBLQ01001787.1	17913	20047	+	100	14.97
NM_175719.3	7173	CHM13 CA Conservative 2.5% Error	LBLQ01005981.1	4786	110567	-	99.45	86.04
NM_175719.3	7173	CHM13 CA Conservative 2.5% Error	LBLQ01001787.1	17913	20047	+	100	14.72
NM_000547.5	7173	CHM13 CA Conservative 2.5% Error	LBLQ01005981.1	4786	110567	-	99.48	86.8
NM_000547.5	7173	CHM13 CA Conservative 2.5% Error	LBLQ01001787.1	17913	20047	+	100	13.92
NM_033200.2	91289	CHM13 CA Conservative 2.5% Error	LBLQ01001906.1	7844434	7847442	-	99.88	65.4
NM_001164315.1	375248	CHM13 CA Conservative 2.5% Error	LBLQ01003444.1	2032	70808	+	95.52	44.71
NM_001164315.1	375248	CHM13 CA Conservative 2.5% Error	LBLQ01001930.1	15667	62166	+	93.42	42.71
NM_001164315.1	375248	CHM13 CA Conservative 2.5% Error	LBLQ01010139.1	46763	78226	+	95.02	19.85
NM_025190.3	57730	CHM13 CA Conservative 2.5% Error	LBLQ01001099.1	492	37595	-	99.44	62.49
NM_025190.3	57730	CHM13 CA Conservative 2.5% Error	LBLQ01004231.1	3077	51367	+	98.71	30.85
NM_025190.3	57730	CHM13 CA Conservative 2.5% Error	LBLQ01004229.1	6139	17198	+	100	16.28
NM_001099771.2	728378	CHM13 CA Conservative 2.5% Error	LBLQ01003358.1	68383	101413	+	93.53	78.76
NM_001099771.2	728378	CHM13 CA Conservative 2.5% Error	LBLQ01004119.1	5091	13737	-	91.58	9.52
NM_031218.3	81931	CHM13 CA Conservative 2.5% Error	LBLQ01002078.1	4417532	4436545	-	100	89.08
NM_031218.3	81931	CHM13 CA Conservative 2.5% Error	LBLQ01006267.1	942037	957780	+	100	14.38
NM_001164507.1	4703	CHM13 CA Conservative 2.5% Error	LBLQ01000400.1	17	137515	-	99.9	54.57
NM_001164507.1	4703	CHM13 CA Conservative 2.5% Error	LBLQ01000397.1	4332976	4441668	-	99.9	43.91
NM_001164508.1	4703	CHM13 CA Conservative 2.5% Error	LBLQ01000400.1	17	137515	-	99.9	54.57
NM_001164508.1	4703	CHM13 CA Conservative 2.5% Error	LBLQ01000397.1	4332976	4441668	-	99.9	43.91
NM_004543.4	4703	CHM13 CA Conservative 2.5% Error	LBLQ01000400.1	12846	137515	-	99.97	57.18
NM_004543.4	4703	CHM13 CA Conservative 2.5% Error	LBLQ01000397.1	4332976	4441664	-	99.82	43.1
NM_033225.5	64478	CHM13 CA Conservative 2.5% Error	LBLQ01002943.1	483383	957942	-	99.87	86.34
NM_033225.5	64478	CHM13 CA Conservative 2.5% Error	LBLQ01002852.1	1197247	2721575	+	100	13.6
NM_001123363.3	729540	CHM13 CA Conservative 2.5% Error	LBLQ01001739.1	976546	1086537	-	97.02	73.2
NM_001123363.3	729540	CHM13 CA Conservative 2.5% Error	LBLQ01001307.1	1	20339	+	97.01	37.51
NM_006569.5	10669	CHM13 CA Conservative 2.5% Error	LBLQ01000389.1	3384100	3402624	-	99.78	97.35
NM_001166239.1	10669	CHM13 CA Conservative 2.5% Error	LBLQ01000389.1	3384100	3402402	-	99.76	97.13
NM_001077653.2	57057	CHM13 CA Conservative 2.5% Error	LBLQ01000996.1	17581	40194	-	99.7	75.54
NM_001077653.2	57057	CHM13 CA Conservative 2.5% Error	LBLQ01000994.1	65867	68021	-	100	25
NM_001078170.2	729857	CHM13 CA Conservative 2.5% Error	LBLQ01000717.1	175817	207468	-	99.86	54.64
NM_001078170.2	729857	CHM13 CA Conservative 2.5% Error	LBLQ01002259.1	3103	26589	-	99.81	39.48
NM_001078170.2	729857	CHM13 CA Conservative 2.5% Error	LBLQ01002368.1	24590	34101	+	99.55	8.06
NM_021023.5	10878	CHM13 CA Conservative 2.5% Error	LBLQ01002289.1	3074731	3105635	+	95.41	92.56
NM_001166624.1	10878	CHM13 CA Conservative 2.5% Error	LBLQ01002289.1	3074731	3105635	+	94.94	91.62
NM_001167675.1	253559	CHM13 CA Conservative 2.5% Error	LBLQ01009490.1	287841	560234	+	99.93	92.49
NM_001167675.1	253559	CHM13 CA Conservative 2.5% Error	LBLQ01000778.1	568999	569685	-	100	7.24
NM_001168338.1	5340	CHM13 CA Conservative 2.5% Error	LBLQ01002082.1	3973	9439	+	99.9	86.75
NM_001170714.1	9564	CHM13 CA Conservative 2.5% Error	LBLQ01002430.1	14408	15479	-	96.48	18.45
NM_001170715.1	9564	CHM13 CA Conservative 2.5% Error	LBLQ01002430.1	14408	15510	-	94.09	20.87
NM_001170716.1	9564	CHM13 CA Conservative 2.5% Error	LBLQ01002430.1	14408	15477	-	96.62	20.34
NM_001170717.1	9564	CHM13 CA Conservative 2.5% Error	LBLQ01002430.1	14854	15630	-	97.42	23.46
NM_001170718.1	9564	CHM13 CA Conservative 2.5% Error	LBLQ01002430.1	14408	15611	-	89.2	23.15
NM_014567.3	9564	CHM13 CA Conservative 2.5% Error	LBLQ01002430.1	14408	15630	-	96.64	24.65
NM_001170719.1	9564	CHM13 CA Conservative 2.5% Error	LBLQ01002430.1	14408	15477	-	96.62	19.27
NM_001001671.3	389840	CHM13 CA Conservative 2.5% Error	LBLQ01003307.1	4090	59291	+	99.87	69.04
NM_001001671.3	389840	CHM13 CA Conservative 2.5% Error	LBLQ01000743.1	6432	96277	-	99.93	31.1
NM_147195.2	253650	CHM13 CA Conservative 2.5% Error	LBLQ01001688.1	171248	214583	+	99.64	75.63
NM_138803.3	130940	CHM13 CA Conservative 2.5% Error	LBLQ01003137.1	5174996	5348958	-	99.7	84.32
NM_138803.3	130940	CHM13 CA Conservative 2.5% Error	LBLQ01001468.1	672	99026	-	99.14	16.37
NM_015678.4	26960	CHM13 CA Conservative 2.5% Error	LBLQ01005041.1	26277584	26525127	-	99.79	39.93
NM_015678.4	26960	CHM13 CA Conservative 2.5% Error	LBLQ01005042.1	17235	427280	-	100	60.26
NM_173653.3	285195	CHM13 CA Conservative 2.5% Error	LBLQ01000358.1	11622	130588	+	99.44	54.75
NM_173653.3	285195	CHM13 CA Conservative 2.5% Error	LBLQ01000355.1	72586	454133	-	99.94	46.01
NM_001637.3	313	CHM13 CA Conservative 2.5% Error	LBLQ01000997.1	5964	181945	-	99.54	63.19
NM_001637.3	313	CHM13 CA Conservative 2.5% Error	LBLQ01000996.1	1298306	1325863	-	98.12	36.47
NM_001177506.1	313	CHM13 CA Conservative 2.5% Error	LBLQ01000997.1	5964	181945	-	99.54	60.25
NM_001177506.1	313	CHM13 CA Conservative 2.5% Error	LBLQ01000996.1	1298306	1325863	-	98.34	39.42
NM_001177507.1	313	CHM13 CA Conservative 2.5% Error	LBLQ01000997.1	5964	181945	-	99.51	61.68
NM_001177507.1	313	CHM13 CA Conservative 2.5% Error	LBLQ01000996.1	1298306	1325863	-	98.12	37.96
NM_001178055.1	79668	CHM13 CA Conservative 2.5% Error	LBLQ01001613.1	77578	173980	+	99.92	95.47
NM_001178055.1	79668	CHM13 CA Conservative 2.5% Error	LBLQ01009904.1	23777	26006	+	100	4.55
NM_024615.3	79668	CHM13 CA Conservative 2.5% Error	LBLQ01001613.1	77578	173980	+	99.92	95.79
NM_024615.3	79668	CHM13 CA Conservative 2.5% Error	LBLQ01009904.1	24819	26006	+	100	4.23
NM_001178056.1	79668	CHM13 CA Conservative 2.5% Error	LBLQ01001613.1	77578	173980	+	99.92	95.71
NM_001178056.1	79668	CHM13 CA Conservative 2.5% Error	LBLQ01009904.1	24819	26006	+	100	4.31
NM_178566.4	340481	CHM13 CA Conservative 2.5% Error	LBLQ01000483.1	3180	54333	+	99.73	92.04
NM_178566.4	340481	CHM13 CA Conservative 2.5% Error	LBLQ01000221.1	941427	972841	+	99.88	9.2
NM_172213.3	926	CHM13 CA Conservative 2.5% Error	LBLQ01002238.1	19525	36542	+	100	63.49
NM_172101.3	926	CHM13 CA Conservative 2.5% Error	LBLQ01002238.1	19525	36541	+	100	60.35
NM_172102.3	926	CHM13 CA Conservative 2.5% Error	LBLQ01002238.1	19525	36542	+	100	60.14
NM_001178100.1	926	CHM13 CA Conservative 2.5% Error	LBLQ01002238.1	19525	28453	+	100	58.58
NM_018196.3	55217	CHM13 CA Conservative 2.5% Error	LBLQ01001737.1	1	107496	-	99.91	30.67
NM_018196.3	55217	CHM13 CA Conservative 2.5% Error	LBLQ01001735.1	110635	114135	-	99.53	70.81
NM_015693.3	27152	CHM13 CA Conservative 2.5% Error	LBLQ01001880.1	712065	765522	-	99.95	73.46
NM_152299.3	29781	CHM13 CA Conservative 2.5% Error	LBLQ01003545.1	7647	16014	+	99.87	93.18
NM_001185011.1	29781	CHM13 CA Conservative 2.5% Error	LBLQ01003545.1	7647	16014	+	99.87	93.18
NM_080630.3	1301	CHM13 CA Conservative 2.5% Error	LBLQ01010121.1	16823	171617	+	99.93	86.07
NM_080630.3	1301	CHM13 CA Conservative 2.5% Error	LBLQ01001277.1	25185	59050	-	100	13.93
NM_001190709.1	1301	CHM13 CA Conservative 2.5% Error	LBLQ01010121.1	16823	171617	+	99.93	86.52
NM_001190709.1	1301	CHM13 CA Conservative 2.5% Error	LBLQ01001277.1	25185	59050	-	100	13.48
NM_005932.3	4285	CHM13 CA Conservative 2.5% Error	LBLQ01001147.1	2020432	2103954	+	99.94	80.82
NM_005932.3	4285	CHM13 CA Conservative 2.5% Error	LBLQ01002202.1	4250826	4280846	-	100	18.64
NM_001079877.2	10156	CHM13 CA Conservative 2.5% Error	LBLQ01000988.1	25953	40841	-	99.86	79.18
NM_001079877.2	10156	CHM13 CA Conservative 2.5% Error	LBLQ01000985.1	1	21188	-	99.9	18.3
NM_006989.5	10156	CHM13 CA Conservative 2.5% Error	LBLQ01000988.1	25953	40841	-	99.86	79.7
NM_006989.5	10156	CHM13 CA Conservative 2.5% Error	LBLQ01000985.1	1	21188	-	99.9	17.85
NM_139173.3	150159	CHM13 CA Conservative 2.5% Error	LBLQ01001754.1	129	45699	-	96.61	71.74
NM_001100874.2	150159	CHM13 CA Conservative 2.5% Error	LBLQ01001754.1	1744	45699	-	96.31	55.72
NM_003429.4	7639	CHM13 CA Conservative 2.5% Error	LBLQ01004422.1	12104476	12125444	+	82.83	14.62
NM_007086.3	11169	CHM13 CA Conservative 2.5% Error	LBLQ01000391.1	9420	80969	-	99.96	51.93
NM_007086.3	11169	CHM13 CA Conservative 2.5% Error	LBLQ01000390.1	9484514	9492309	-	99.72	48.37
NM_001008396.2	11169	CHM13 CA Conservative 2.5% Error	LBLQ01000391.1	9420	80969	-	99.96	51.18
NM_001008396.2	11169	CHM13 CA Conservative 2.5% Error	LBLQ01000390.1	9484514	9492309	-	99.72	49.13
NM_032777.9	25960	CHM13 CA Conservative 2.5% Error	LBLQ01000457.1	5466447	5481163	-	100	86.8
NM_032777.9	25960	CHM13 CA Conservative 2.5% Error	LBLQ01000458.1	11607	29708	-	99.18	12.16
NM_013263.4	29117	CHM13 CA Conservative 2.5% Error	LBLQ01000772.1	3863177	3899073	-	99.89	82.11
NM_001173984.2	29117	CHM13 CA Conservative 2.5% Error	LBLQ01000772.1	3863177	3899073	-	99.89	82.13
NM_001193484.1	3987	CHM13 CA Conservative 2.5% Error	LBLQ01001739.1	1089348	1116995	-	99.9	95.18
NM_198097.3	221960	CHM13 CA Conservative 2.5% Error	LBLQ01001881.1	4930	19257	-	99.81	56.79
NM_024583.4	79634	CHM13 CA Conservative 2.5% Error	LBLQ01000571.1	11708	18384	+	99.18	71.73
NM_001193528.1	79634	CHM13 CA Conservative 2.5% Error	LBLQ01000571.1	11708	18384	+	99.18	73.93
NM_001001888.3	425054	CHM13 CA Conservative 2.5% Error	LBLQ01003152.1	1322594	1324184	+	99.17	92.34
NM_001097613.2	653519	CHM13 CA Conservative 2.5% Error	LBLQ01000678.1	570	23853	+	99.79	48.7
NM_001097613.2	653519	CHM13 CA Conservative 2.5% Error	LBLQ01000677.1	2715	25757	+	99.73	37.19
NM_022359.5	9659	CHM13 CA Conservative 2.5% Error	LBLQ01000636.1	2297	71009	+	97.72	66.5
NM_022359.5	9659	CHM13 CA Conservative 2.5% Error	LBLQ01000634.1	10703	15033	+	98.13	34.07
NM_001195563.1	23261	CHM13 CA Conservative 2.5% Error	LBLQ01000252.1	167818	168306	+	81.73	65.67
NM_052958.2	116328	CHM13 CA Conservative 2.5% Error	LBLQ01008264.1	4793	355132	+	100	66.55
NM_052958.2	116328	CHM13 CA Conservative 2.5% Error	LBLQ01008261.1	2953223	3080068	+	97.01	38.24
NM_001195639.1	116328	CHM13 CA Conservative 2.5% Error	LBLQ01008264.1	4793	71937	+	99.96	77.95
NM_001195639.1	116328	CHM13 CA Conservative 2.5% Error	LBLQ01008261.1	2953223	3068967	+	100	21.99
NM_152666.2	200150	CHM13 CA Conservative 2.5% Error	LBLQ01002560.1	7350110	7609942	-	99.89	87.44
NM_001198542.1	54768	CHM13 CA Conservative 2.5% Error	LBLQ01001002.1	48651	147058	-	99.45	63.38
NM_001198542.1	54768	CHM13 CA Conservative 2.5% Error	LBLQ01001004.1	1075	79147	-	100	30.42
NM_001198543.1	54768	CHM13 CA Conservative 2.5% Error	LBLQ01001002.1	48651	147058	-	99.45	63.99
NM_001198543.1	54768	CHM13 CA Conservative 2.5% Error	LBLQ01001004.1	1075	79147	-	100	29.75
NM_001004065.4	11217	CHM13 CA Conservative 2.5% Error	LBLQ01001355.1	4335942	4372332	+	99.92	96.29
NM_001198656.1	11217	CHM13 CA Conservative 2.5% Error	LBLQ01001355.1	4335942	4372332	+	99.92	96.31
NM_033514.4	96626	CHM13 CA Conservative 2.5% Error	LBLQ01004574.1	395	973	+	99.82	47.61
NM_001198963.1	2218	CHM13 CA Conservative 2.5% Error	LBLQ01000283.1	148700	193230	-	99.9	87.26
NM_001198963.1	2218	CHM13 CA Conservative 2.5% Error	LBLQ01000284.1	3	38498	-	99.73	15.21
NM_001199011.1	84516	CHM13 CA Conservative 2.5% Error	LBLQ01001029.1	2125400	2125596	+	92.38	28.18
NM_003502.3	8312	CHM13 CA Conservative 2.5% Error	LBLQ01003436.1	1	58844	+	99.66	72.65
NM_003502.3	8312	CHM13 CA Conservative 2.5% Error	LBLQ01003431.1	19619	26177	+	98.54	35.29
NM_181050.2	8312	CHM13 CA Conservative 2.5% Error	LBLQ01003436.1	1	58844	+	99.64	71.81
NM_181050.2	8312	CHM13 CA Conservative 2.5% Error	LBLQ01003431.1	19619	26148	+	99.84	35.54
NM_001100117.2	9699	CHM13 CA Conservative 2.5% Error	LBLQ01000451.1	5117178	5486268	-	99.91	87.71
NM_001100117.2	9699	CHM13 CA Conservative 2.5% Error	LBLQ01008867.1	28082	293877	-	99.88	12.38
NM_001199417.1	57636	CHM13 CA Conservative 2.5% Error	LBLQ01008425.1	18125	40421	-	99.96	49.28
NM_001199417.1	57636	CHM13 CA Conservative 2.5% Error	LBLQ01005118.1	128883	172435	+	99.3	36.51
NM_001199417.1	57636	CHM13 CA Conservative 2.5% Error	LBLQ01002136.1	13038	42169	-	96.96	28.24
NM_001200001.1	4853	CHM13 CA Conservative 2.5% Error	LBLQ01000624.1	2580862	2643096	-	99.94	83.57
NM_001200001.1	4853	CHM13 CA Conservative 2.5% Error	LBLQ01001617.1	17988	18378	+	95.94	8.87
NM_001200001.1	4853	CHM13 CA Conservative 2.5% Error	LBLQ01000625.1	17565	17825	-	98.09	5.98
NM_024408.3	4853	CHM13 CA Conservative 2.5% Error	LBLQ01000624.1	2557302	2643096	-	99.98	93.82
NM_024408.3	4853	CHM13 CA Conservative 2.5% Error	LBLQ01001617.1	17988	18378	+	95.94	3.34
NM_024408.3	4853	CHM13 CA Conservative 2.5% Error	LBLQ01000625.1	17565	17825	-	98.09	2.25
NM_001201543.1	84140	CHM13 CA Conservative 2.5% Error	LBLQ01005943.1	3892	21411	-	99.77	92.56
NM_001123.3	132	CHM13 CA Conservative 2.5% Error	LBLQ01002167.1	1892	486783	+	100	79.25
NM_001123.3	132	CHM13 CA Conservative 2.5% Error	LBLQ01001296.1	13602	37960	-	99.78	20.8
NM_006721.3	132	CHM13 CA Conservative 2.5% Error	LBLQ01002167.1	1843	486783	+	98.6	90.24
NM_001202449.1	132	CHM13 CA Conservative 2.5% Error	LBLQ01002167.1	63574	486783	+	98.96	82.25
NM_001202449.1	132	CHM13 CA Conservative 2.5% Error	LBLQ01001296.1	13603	37960	-	99.78	21.26
NM_001202450.1	132	CHM13 CA Conservative 2.5% Error	LBLQ01002167.1	1843	486783	+	98.46	89.35
NM_016434.3	51750	CHM13 CA Conservative 2.5% Error	LBLQ01005682.1	2748	38167	-	99.63	77.06
NM_016434.3	51750	CHM13 CA Conservative 2.5% Error	LBLQ01008193.1	278897	280781	-	99.73	22.98
NM_032957.4	51750	CHM13 CA Conservative 2.5% Error	LBLQ01005682.1	2748	38167	-	99.64	77.38
NM_032957.4	51750	CHM13 CA Conservative 2.5% Error	LBLQ01008193.1	278897	280781	-	99.73	22.65
NM_001204199.1	6728	CHM13 CA Conservative 2.5% Error	LBLQ01001555.1	1530373	1578549	-	94.99	70.76
NM_001204352.1	50859	CHM13 CA Conservative 2.5% Error	LBLQ01000613.1	163915	185255	-	99.71	69.58
NM_001204352.1	50859	CHM13 CA Conservative 2.5% Error	LBLQ01000617.1	3695	469768	-	97.05	35.24
NM_001204353.1	50859	CHM13 CA Conservative 2.5% Error	LBLQ01000613.1	163915	185255	-	99.71	76.15
NM_001204353.1	50859	CHM13 CA Conservative 2.5% Error	LBLQ01000617.1	3695	469604	-	96.1	29.13
NM_001204354.1	50859	CHM13 CA Conservative 2.5% Error	LBLQ01000613.1	163915	185255	-	99.71	72.59
NM_001204354.1	50859	CHM13 CA Conservative 2.5% Error	LBLQ01000617.1	3695	469768	-	96.65	32.44
NM_001204355.1	50859	CHM13 CA Conservative 2.5% Error	LBLQ01000613.1	163915	185255	-	99.71	75.55
NM_001204355.1	50859	CHM13 CA Conservative 2.5% Error	LBLQ01000617.1	3695	469768	-	96.2	29.69
NM_001204358.1	50859	CHM13 CA Conservative 2.5% Error	LBLQ01000613.1	184612	185255	-	100	43.1
NM_001204358.1	50859	CHM13 CA Conservative 2.5% Error	LBLQ01000617.1	5963	469768	-	98.67	58.16
NM_001204356.1	50859	CHM13 CA Conservative 2.5% Error	LBLQ01000613.1	163915	185257	-	99.71	74.54
NM_001204356.1	50859	CHM13 CA Conservative 2.5% Error	LBLQ01000617.1	108691	469768	-	97.55	28.56
NM_001204478.1	100533496	CHM13 CA Conservative 2.5% Error	LBLQ01001154.1	102558	106829	+	100	77.86
NM_001204478.1	100533496	CHM13 CA Conservative 2.5% Error	LBLQ01001152.1	3083	20922	+	99.84	22.04
NM_001205288.1	100288695	CHM13 CA Conservative 2.5% Error	LBLQ01001739.1	1113795	1117036	-	95.29	63.65
NM_016377.3	9465	CHM13 CA Conservative 2.5% Error	LBLQ01001001.1	46442	48447	+	100	68.37
NM_016377.3	9465	CHM13 CA Conservative 2.5% Error	LBLQ01000998.1	1517177	1601307	+	100	31.66
NM_001206650.1	5676	CHM13 CA Conservative 2.5% Error	LBLQ01008984.1	75596	81193	-	99.86	90.61
NM_001077261.3	9612	CHM13 CA Conservative 2.5% Error	LBLQ01008579.1	2577631	2610055	-	99.41	61.16
NM_001077261.3	9612	CHM13 CA Conservative 2.5% Error	LBLQ01000408.1	3321292	3541020	+	99.9	47.62
NM_006312.5	9612	CHM13 CA Conservative 2.5% Error	LBLQ01008579.1	2577631	2610032	-	99.44	61.3
NM_006312.5	9612	CHM13 CA Conservative 2.5% Error	LBLQ01000408.1	3321292	3541020	+	99.9	47.05
NM_001206654.1	9612	CHM13 CA Conservative 2.5% Error	LBLQ01008579.1	2577631	2610055	-	99.43	61.77
NM_001206654.1	9612	CHM13 CA Conservative 2.5% Error	LBLQ01000408.1	3321292	3541020	+	99.9	46.87
NM_001206744.1	7173	CHM13 CA Conservative 2.5% Error	LBLQ01005981.1	4786	110567	-	99.48	86.67
NM_001206744.1	7173	CHM13 CA Conservative 2.5% Error	LBLQ01001787.1	17913	20047	+	100	13.94
NM_001206745.1	7173	CHM13 CA Conservative 2.5% Error	LBLQ01005981.1	4786	110567	-	99.45	85.9
NM_001206745.1	7173	CHM13 CA Conservative 2.5% Error	LBLQ01001787.1	17913	20047	+	100	14.74
NM_001097615.2	548644	CHM13 CA Conservative 2.5% Error	LBLQ01000920.1	13712	43962	-	99.58	85.65
NM_018702.3	105	CHM13 CA Conservative 2.5% Error	LBLQ01006836.1	7612	64478	+	99.42	80.06
NM_018702.3	105	CHM13 CA Conservative 2.5% Error	LBLQ01001187.1	5068478	5562637	+	99.58	20.19
NM_001040272.5	92949	CHM13 CA Conservative 2.5% Error	LBLQ01001140.1	14343	267384	+	99.75	87.45
NM_001040272.5	92949	CHM13 CA Conservative 2.5% Error	LBLQ01005302.1	2476289	2641639	+	99.79	12.57
NM_052866.4	92949	CHM13 CA Conservative 2.5% Error	LBLQ01001140.1	14343	41663	+	100	47.74
NM_052866.4	92949	CHM13 CA Conservative 2.5% Error	LBLQ01005302.1	2476289	2641639	+	99.79	52.3
NM_032959.5	246721	CHM13 CA Conservative 2.5% Error	LBLQ01000920.1	13435	43962	-	99.65	86.36
NM_001193485.2	3987	CHM13 CA Conservative 2.5% Error	LBLQ01001739.1	1089348	1117036	-	99.36	91.33
NM_001242672.1	100287898	CHM13 CA Conservative 2.5% Error	LBLQ01008202.1	317190	321390	-	99.9	57.4
NM_001242672.1	100287898	CHM13 CA Conservative 2.5% Error	LBLQ01001866.1	377618	383695	+	100	42.92
NM_001242713.1	100289561	CHM13 CA Conservative 2.5% Error	LBLQ01000982.1	12894	25092	+	99.66	84.46
NM_177534.2	6817	CHM13 CA Conservative 2.5% Error	LBLQ01000419.1	30586	31614	+	97.41	51.83
NM_177536.3	6817	CHM13 CA Conservative 2.5% Error	LBLQ01000419.1	16440	26869	+	94.38	53.36
NM_001055.3	6817	CHM13 CA Conservative 2.5% Error	LBLQ01000419.1	29922	31614	+	96.93	38.11
NM_177529.2	6817	CHM13 CA Conservative 2.5% Error	LBLQ01000419.1	29922	31614	+	97.11	39.61
NM_177530.2	6817	CHM13 CA Conservative 2.5% Error	LBLQ01000419.1	30586	31614	+	96.93	45.1
NM_020344.3	25769	CHM13 CA Conservative 2.5% Error	LBLQ01001140.1	863640	884305	-	99.6	84.74
NM_020344.3	25769	CHM13 CA Conservative 2.5% Error	LBLQ01000353.1	8397809	8665153	+	99.78	17.38
NM_001193288.2	25769	CHM13 CA Conservative 2.5% Error	LBLQ01001140.1	863640	884305	-	99.6	85.14
NM_001193288.2	25769	CHM13 CA Conservative 2.5% Error	LBLQ01000353.1	8397809	8665153	+	99.78	16.99
NM_001243403.1	23274	CHM13 CA Conservative 2.5% Error	LBLQ01001390.1	1359578	1476432	+	99.91	75.65
NM_001244714.1	55277	CHM13 CA Conservative 2.5% Error	LBLQ01000289.1	41685	285924	-	100	45.16
NM_001244714.1	55277	CHM13 CA Conservative 2.5% Error	LBLQ01000287.1	2949951	3054760	-	97.8	38.21
NM_001244714.1	55277	CHM13 CA Conservative 2.5% Error	LBLQ01000288.1	20041	50614	-	99.69	19.39
NM_001244752.1	441459	CHM13 CA Conservative 2.5% Error	LBLQ01002894.1	3045045	3100647	+	93.92	91.44
NM_205843.2	4782	CHM13 CA Conservative 2.5% Error	LBLQ01002528.1	466948	511053	-	99.61	91.84
NM_205843.2	4782	CHM13 CA Conservative 2.5% Error	LBLQ01002530.1	45552	68229	-	99.84	8.13
NM_001245002.1	4782	CHM13 CA Conservative 2.5% Error	LBLQ01002528.1	466948	511053	-	99.61	92.1
NM_001245002.1	4782	CHM13 CA Conservative 2.5% Error	LBLQ01002530.1	45552	61228	-	99.84	7.87
NM_005597.3	4782	CHM13 CA Conservative 2.5% Error	LBLQ01002528.1	466948	511053	-	99.59	91.86
NM_005597.3	4782	CHM13 CA Conservative 2.5% Error	LBLQ01002530.1	45552	61228	-	99.84	8.11
NM_001245004.1	4782	CHM13 CA Conservative 2.5% Error	LBLQ01002528.1	466948	511053	-	99.6	91.95
NM_001245004.1	4782	CHM13 CA Conservative 2.5% Error	LBLQ01002530.1	45552	61228	-	99.84	8.02
NM_001245005.1	4782	CHM13 CA Conservative 2.5% Error	LBLQ01002528.1	466948	511053	-	99.6	91.68
NM_001245005.1	4782	CHM13 CA Conservative 2.5% Error	LBLQ01002530.1	45552	68229	-	99.84	8.29
NM_001251967.1	50859	CHM13 CA Conservative 2.5% Error	LBLQ01000613.1	163915	185255	-	99.71	79.03
NM_001251967.1	50859	CHM13 CA Conservative 2.5% Error	LBLQ01000617.1	3695	469768	-	95.54	26.45
NM_022662.3	64682	CHM13 CA Conservative 2.5% Error	LBLQ01001976.1	1351	76674	-	99.7	52.84
NM_022662.3	64682	CHM13 CA Conservative 2.5% Error	LBLQ01000716.1	10992	38325	-	99.74	41.24
NM_001130690.2	10846	CHM13 CA Conservative 2.5% Error	LBLQ01002084.1	4492926	4509144	-	100	74.75
NM_001130690.2	10846	CHM13 CA Conservative 2.5% Error	LBLQ01002085.1	3175	286647	-	100	25.24
NM_001256171.1	7639	CHM13 CA Conservative 2.5% Error	LBLQ01001514.1	64830	84762	-	85.27	17.98
NM_001256172.1	7639	CHM13 CA Conservative 2.5% Error	LBLQ01001514.1	84378	84762	-	85.82	23.67
NM_006281.3	6788	CHM13 CA Conservative 2.5% Error	LBLQ01001426.1	864038	1116772	-	99.95	82.6
NM_006281.3	6788	CHM13 CA Conservative 2.5% Error	LBLQ01001427.1	12589	109449	-	89.1	23.33
NM_001256313.1	6788	CHM13 CA Conservative 2.5% Error	LBLQ01001426.1	864038	1005613	-	99.95	80.6
NM_001256313.1	6788	CHM13 CA Conservative 2.5% Error	LBLQ01001427.1	12589	109439	-	96.7	22.85
NM_001256312.1	6788	CHM13 CA Conservative 2.5% Error	LBLQ01001426.1	864038	1116772	-	99.95	73.66
NM_001256312.1	6788	CHM13 CA Conservative 2.5% Error	LBLQ01001427.1	12589	225919	-	92.66	31.63
NM_001256629.1	9024	CHM13 CA Conservative 2.5% Error	LBLQ01002998.1	543061	555967	-	99.64	61.08
NM_001256629.1	9024	CHM13 CA Conservative 2.5% Error	LBLQ01002999.1	1783	65444	-	99.52	45.24
NM_001256627.1	9024	CHM13 CA Conservative 2.5% Error	LBLQ01002998.1	543061	555967	-	99.62	64.67
NM_001256627.1	9024	CHM13 CA Conservative 2.5% Error	LBLQ01002999.1	1783	65444	-	99.52	41.04
NM_003957.3	9024	CHM13 CA Conservative 2.5% Error	LBLQ01002998.1	543061	555967	-	99.63	60.64
NM_003957.3	9024	CHM13 CA Conservative 2.5% Error	LBLQ01002999.1	1783	65444	-	99.52	45.76
NM_001256630.1	9024	CHM13 CA Conservative 2.5% Error	LBLQ01002998.1	543061	557483	-	99.35	64.86
NM_001256630.1	9024	CHM13 CA Conservative 2.5% Error	LBLQ01002999.1	1783	44100	-	99.52	41.54
NM_004892.5	9554	CHM13 CA Conservative 2.5% Error	LBLQ01000632.1	7782	20846	-	99.04	88.74
NM_001257362.1	100288966	CHM13 CA Conservative 2.5% Error	LBLQ01003332.1	3756	13873	-	99.81	60.62
NM_001257362.1	100288966	CHM13 CA Conservative 2.5% Error	LBLQ01002052.1	277004	299803	-	96.59	52.08
NM_001257387.1	11200	CHM13 CA Conservative 2.5% Error	LBLQ01009806.1	252	46579	-	100	73.12
NM_021988.5	7335	CHM13 CA Conservative 2.5% Error	LBLQ01000337.1	850256	852070	-	94.11	71.31
NM_199144.2	7335	CHM13 CA Conservative 2.5% Error	LBLQ01000337.1	850256	852070	-	94.11	73.53
NM_001257393.1	7335	CHM13 CA Conservative 2.5% Error	LBLQ01000337.1	850256	852070	-	94.11	77.66
NM_001257998.1	55610	CHM13 CA Conservative 2.5% Error	LBLQ01001653.1	1712192	1834002	+	99.45	47.93
NM_001257998.1	55610	CHM13 CA Conservative 2.5% Error	LBLQ01001286.1	2990	23080	-	99.82	61.36
NM_017667.3	55610	CHM13 CA Conservative 2.5% Error	LBLQ01001653.1	1712192	1834002	+	99.45	47.68
NM_017667.3	55610	CHM13 CA Conservative 2.5% Error	LBLQ01001286.1	2990	23080	-	99.82	61.66
NM_005019.4	5136	CHM13 CA Conservative 2.5% Error	LBLQ01002803.1	121990	205946	-	99.52	80.58
NM_005019.4	5136	CHM13 CA Conservative 2.5% Error	LBLQ01000564.1	1334373	1632854	+	99.9	21.59
NM_001258312.1	5136	CHM13 CA Conservative 2.5% Error	LBLQ01002803.1	121990	205946	-	99.52	80.82
NM_001258312.1	5136	CHM13 CA Conservative 2.5% Error	LBLQ01000564.1	1334137	1632854	+	99.9	21.35
NM_001003683.2	5136	CHM13 CA Conservative 2.5% Error	LBLQ01002803.1	149859	205946	-	100	57.71
NM_001003683.2	5136	CHM13 CA Conservative 2.5% Error	LBLQ01000564.1	1334137	1632854	+	99.9	47.24
NM_001258313.1	5136	CHM13 CA Conservative 2.5% Error	LBLQ01002803.1	149859	205946	-	100	53.29
NM_001258313.1	5136	CHM13 CA Conservative 2.5% Error	LBLQ01000564.1	1429669	1632854	+	99.91	51.28
NM_001258314.1	5136	CHM13 CA Conservative 2.5% Error	LBLQ01002803.1	149859	205946	-	100	61.83
NM_001258314.1	5136	CHM13 CA Conservative 2.5% Error	LBLQ01000564.1	1614645	1632854	+	99.77	43.47
NM_001258414.1	115584	CHM13 CA Conservative 2.5% Error	LBLQ01001386.1	3307	27396	-	100	25.75
NM_001258414.1	115584	CHM13 CA Conservative 2.5% Error	LBLQ01001385.1	3424355	3466576	-	98.54	75.97
NM_001261424.1	151242	CHM13 CA Conservative 2.5% Error	LBLQ01002803.1	43409	113335	+	99.42	85.35
NM_001261424.1	151242	CHM13 CA Conservative 2.5% Error	LBLQ01001523.1	1163397	1163764	+	100	12.05
NM_001080545.2	151242	CHM13 CA Conservative 2.5% Error	LBLQ01002803.1	43409	99719	+	98.92	59.92
NM_001080545.2	151242	CHM13 CA Conservative 2.5% Error	LBLQ01001523.1	1163397	1180590	+	94.42	51.02
NM_001261425.1	151242	CHM13 CA Conservative 2.5% Error	LBLQ01002803.1	43409	113335	+	99.42	85.94
NM_001261425.1	151242	CHM13 CA Conservative 2.5% Error	LBLQ01001523.1	1163397	1163764	+	100	12.13
NM_001014380.2	84056	CHM13 CA Conservative 2.5% Error	LBLQ01001146.1	13860	66792	+	99.9	93.51
NM_032116.4	84056	CHM13 CA Conservative 2.5% Error	LBLQ01001146.1	13860	66792	+	99.9	92.99
NM_002613.4	5170	CHM13 CA Conservative 2.5% Error	LBLQ01001769.1	2191122	2216881	-	99.9	88.09
NM_002613.4	5170	CHM13 CA Conservative 2.5% Error	LBLQ01001981.1	431154	451158	+	100	6.01
NM_031268.5	5170	CHM13 CA Conservative 2.5% Error	LBLQ01001769.1	2191122	2216886	-	99.85	93.06
NM_031268.5	5170	CHM13 CA Conservative 2.5% Error	LBLQ01001981.1	431154	451158	+	100	6.35
NM_001261816.1	5170	CHM13 CA Conservative 2.5% Error	LBLQ01001769.1	2191122	2216881	-	99.9	87.74
NM_001261816.1	5170	CHM13 CA Conservative 2.5% Error	LBLQ01001981.1	431154	451158	+	100	6.2
NM_213651.2	29957	CHM13 CA Conservative 2.5% Error	LBLQ01009817.1	3482522	3533756	-	100	91.07
NM_033338.5	840	CHM13 CA Conservative 2.5% Error	LBLQ01001295.1	1470728	1482579	-	99.68	81.57
NM_033338.5	840	CHM13 CA Conservative 2.5% Error	LBLQ01000385.1	18750	31172	-	99.76	15.36
NM_033339.4	840	CHM13 CA Conservative 2.5% Error	LBLQ01001295.1	1470728	1482579	-	99.68	82.58
NM_033339.4	840	CHM13 CA Conservative 2.5% Error	LBLQ01000385.1	18750	31172	-	99.73	14.32
NM_001227.4	840	CHM13 CA Conservative 2.5% Error	LBLQ01001295.1	1470728	1482581	-	99.63	85.02
NM_001227.4	840	CHM13 CA Conservative 2.5% Error	LBLQ01000385.1	30863	31172	-	99.67	11.89
NM_033340.3	840	CHM13 CA Conservative 2.5% Error	LBLQ01001295.1	1470728	1482579	-	99.67	88.99
NM_033340.3	840	CHM13 CA Conservative 2.5% Error	LBLQ01000385.1	4385	31679	-	96.56	15.42
NM_001267056.1	840	CHM13 CA Conservative 2.5% Error	LBLQ01001295.1	1470728	1482579	-	99.68	89.14
NM_001267057.1	840	CHM13 CA Conservative 2.5% Error	LBLQ01001295.1	1470728	1480644	-	99.95	84.09
NM_001267057.1	840	CHM13 CA Conservative 2.5% Error	LBLQ01000385.1	13217	31172	-	99.76	15.92
NM_014425.3	27130	CHM13 CA Conservative 2.5% Error	LBLQ01000286.1	5263220	5299446	-	99.95	56.72
NM_014425.3	27130	CHM13 CA Conservative 2.5% Error	LBLQ01002894.1	1876	157428	-	94.63	46.49
NM_183245.2	27130	CHM13 CA Conservative 2.5% Error	LBLQ01000286.1	5263220	5299446	-	100	50.19
NM_183245.2	27130	CHM13 CA Conservative 2.5% Error	LBLQ01002894.1	1876	157428	-	94.63	53.5
NM_001040135.2	57180	CHM13 CA Conservative 2.5% Error	LBLQ01002425.1	850696	851619	-	100	46.03
NM_001040135.2	57180	CHM13 CA Conservative 2.5% Error	LBLQ01001938.1	14374	67004	+	97.16	47.04
NM_020445.5	57180	CHM13 CA Conservative 2.5% Error	LBLQ01002425.1	850696	853954	-	99.73	51.28
NM_020445.5	57180	CHM13 CA Conservative 2.5% Error	LBLQ01001938.1	14374	67004	+	97.63	41.65
NM_007014.4	11060	CHM13 CA Conservative 2.5% Error	LBLQ01009198.1	20047	121725	-	99.8	88.86
NM_007014.4	11060	CHM13 CA Conservative 2.5% Error	LBLQ01000470.1	3396	40405	-	100	11.19
NM_001270454.1	11060	CHM13 CA Conservative 2.5% Error	LBLQ01009198.1	20047	121725	-	99.8	89.9
NM_001270454.1	11060	CHM13 CA Conservative 2.5% Error	LBLQ01000470.1	3396	40405	-	100	10.16
NM_001270455.1	11060	CHM13 CA Conservative 2.5% Error	LBLQ01009198.1	51420	121725	-	99.91	82.92
NM_001270455.1	11060	CHM13 CA Conservative 2.5% Error	LBLQ01000470.1	3396	40405	-	100	17.26
NM_001312.3	1397	CHM13 CA Conservative 2.5% Error	LBLQ01002600.1	20	1067	+	100	59.98
NM_001270837.1	1397	CHM13 CA Conservative 2.5% Error	LBLQ01002600.1	20	1067	+	100	44.09
NM_001270837.1	1397	CHM13 CA Conservative 2.5% Error	LBLQ01010131.1	5322306	5329950	+	97.3	38.49
NM_001270841.1	1397	CHM13 CA Conservative 2.5% Error	LBLQ01002600.1	20	1067	+	100	85.04
NM_017558.4	54768	CHM13 CA Conservative 2.5% Error	LBLQ01001002.1	44333	147058	-	99.43	67.13
NM_017558.4	54768	CHM13 CA Conservative 2.5% Error	LBLQ01001004.1	1075	79147	-	100	27.62
NM_001270974.1	54768	CHM13 CA Conservative 2.5% Error	LBLQ01002218.1	1623	166622	+	99.6	68.41
NM_001270974.1	54768	CHM13 CA Conservative 2.5% Error	LBLQ01001002.1	2135	147058	-	99.57	17.95
NM_001270974.1	54768	CHM13 CA Conservative 2.5% Error	LBLQ01001004.1	1075	79147	-	100	6.52
NM_001270974.1	54768	CHM13 CA Conservative 2.5% Error	LBLQ01002220.1	2118	13316	+	99.64	7.2
NM_001271015.1	55284	CHM13 CA Conservative 2.5% Error	LBLQ01000310.1	444765	445089	-	94.76	34.17
NM_001271208.1	4703	CHM13 CA Conservative 2.5% Error	LBLQ01000400.1	17	137515	-	99.9	54.35
NM_001271208.1	4703	CHM13 CA Conservative 2.5% Error	LBLQ01000397.1	4332976	4441668	-	99.9	44.14
NM_001271561.1	5621	CHM13 CA Conservative 2.5% Error	LBLQ01000338.1	418147	433560	+	99.08	99.12
NM_001271850.1	93492	CHM13 CA Conservative 2.5% Error	LBLQ01009836.1	1688	2073	-	96.92	34.26
NM_001271872.1	653464	CHM13 CA Conservative 2.5% Error	LBLQ01006533.1	4411	10909	+	100	56.83
NM_001271872.1	653464	CHM13 CA Conservative 2.5% Error	LBLQ01002292.1	33749	106868	+	98.4	24.23
NM_022479.2	64409	CHM13 CA Conservative 2.5% Error	LBLQ01000910.1	205997	583622	+	100	85.67
NM_022479.2	64409	CHM13 CA Conservative 2.5% Error	LBLQ01000041.1	13735	14241	+	99.6	14.41
NM_001009931.2	388697	CHM13 CA Conservative 2.5% Error	LBLQ01001726.1	268993	288184	+	99.31	69.65
NM_213633.2	5672	CHM13 CA Conservative 2.5% Error	LBLQ01010174.1	244	11791	+	99.31	84.17
NM_001276495.1	5672	CHM13 CA Conservative 2.5% Error	LBLQ01010174.1	244	11791	+	99.24	84.17
NM_001277083.1	653781	CHM13 CA Conservative 2.5% Error	LBLQ01003358.1	68476	101070	+	94.58	87.91
NM_001277083.1	653781	CHM13 CA Conservative 2.5% Error	LBLQ01004116.1	2310	17879	-	98.64	11.29
NM_178450.4	115123	CHM13 CA Conservative 2.5% Error	LBLQ01000297.1	229124	239810	-	99.78	78.4
NM_178450.4	115123	CHM13 CA Conservative 2.5% Error	LBLQ01000572.1	24645	140534	-	100	21.63
NM_001277303.1	100287399	CHM13 CA Conservative 2.5% Error	LBLQ01002053.1	1396	22043	-	98.65	78.6
NM_001277304.1	100996331	CHM13 CA Conservative 2.5% Error	LBLQ01002053.1	1396	22043	-	98.65	78.6
NM_001277335.1	100271927	CHM13 CA Conservative 2.5% Error	LBLQ01000984.1	1050	27939	-	99.12	72.97
NM_001277339.1	100996634	CHM13 CA Conservative 2.5% Error	LBLQ01000850.1	341047	357110	-	99.86	75.26
NM_001037501.2	728841	CHM13 CA Conservative 2.5% Error	LBLQ01000641.1	23685	42585	-	98.25	82.72
NM_001277406.1	653269	CHM13 CA Conservative 2.5% Error	LBLQ01003358.1	68476	100920	+	94.81	88.04
NM_001277406.1	653269	CHM13 CA Conservative 2.5% Error	LBLQ01004116.1	2310	17879	-	98.64	11.46
NM_001037675.3	400818	CHM13 CA Conservative 2.5% Error	LBLQ01000641.1	23685	42585	-	98.68	82.1
NM_001277444.1	400818	CHM13 CA Conservative 2.5% Error	LBLQ01000641.1	23685	42585	-	98.68	73.85
NM_001039703.5	100132406	CHM13 CA Conservative 2.5% Error	LBLQ01000690.1	156	33458	-	97.73	47.51
NM_001039703.5	100132406	CHM13 CA Conservative 2.5% Error	LBLQ01000697.1	465	20119	-	95.36	22.48
NM_017940.4	55672	CHM13 CA Conservative 2.5% Error	LBLQ01000902.1	22654	38270	-	99.11	52.79
NM_017940.4	55672	CHM13 CA Conservative 2.5% Error	LBLQ01006541.1	2785	27186	+	96.96	46.32
NM_017940.4	55672	CHM13 CA Conservative 2.5% Error	LBLQ01003577.1	4879	9975	-	100	8.73
NM_001277961.1	6786	CHM13 CA Conservative 2.5% Error	LBLQ01000218.1	15774	85104	+	99.97	80.8
NM_001277961.1	6786	CHM13 CA Conservative 2.5% Error	LBLQ01008445.1	43439	44145	-	100	16.14
NM_001277962.1	6786	CHM13 CA Conservative 2.5% Error	LBLQ01000218.1	15774	85104	+	99.96	79.48
NM_001277962.1	6786	CHM13 CA Conservative 2.5% Error	LBLQ01008445.1	43439	44145	-	100	17.24
NM_001278141.1	149013	CHM13 CA Conservative 2.5% Error	LBLQ01000641.1	23790	42705	-	97.37	53.11
NM_001278141.1	149013	CHM13 CA Conservative 2.5% Error	LBLQ01002932.1	1	25532	-	99.52	32.62
NM_001278141.1	149013	CHM13 CA Conservative 2.5% Error	LBLQ01000692.1	6682	19652	-	88.11	13.4
NM_001278189.1	7170	CHM13 CA Conservative 2.5% Error	LBLQ01000003.1	1252887	1269310	+	94.42	73.23
NM_001278224.1	55277	CHM13 CA Conservative 2.5% Error	LBLQ01000289.1	29989	80285	-	98.98	24.87
NM_001278224.1	55277	CHM13 CA Conservative 2.5% Error	LBLQ01000287.1	2949951	3052458	-	100	49.74
NM_001278224.1	55277	CHM13 CA Conservative 2.5% Error	LBLQ01000288.1	20041	50614	-	99.69	27.23
NM_001278267.1	100288142	CHM13 CA Conservative 2.5% Error	LBLQ01004878.1	1341	33251	+	96.83	28.04
NM_001278267.1	100288142	CHM13 CA Conservative 2.5% Error	LBLQ01001530.1	14229	38719	-	94.63	27.81
NM_001278267.1	100288142	CHM13 CA Conservative 2.5% Error	LBLQ01001540.1	197	25829	-	96.64	18.36
NM_001278267.1	100288142	CHM13 CA Conservative 2.5% Error	LBLQ01001534.1	249	23816	-	96.11	18.26
NM_001278267.1	100288142	CHM13 CA Conservative 2.5% Error	LBLQ01002394.1	1039	11363	-	95.75	8.85
NM_015383.2	25832	CHM13 CA Conservative 2.5% Error	LBLQ01000690.1	156	33458	-	97.24	50.06
NM_015383.2	25832	CHM13 CA Conservative 2.5% Error	LBLQ01000641.1	23685	42413	-	97.07	36.49
NM_015383.2	25832	CHM13 CA Conservative 2.5% Error	LBLQ01002555.1	538	7078	-	97.07	9.8
NM_175623.3	117177	CHM13 CA Conservative 2.5% Error	LBLQ01000253.1	115	22707	+	99.66	85.43
NM_022456.4	117177	CHM13 CA Conservative 2.5% Error	LBLQ01000253.1	115	22707	+	99.66	86.63
NM_175625.3	117177	CHM13 CA Conservative 2.5% Error	LBLQ01000253.1	115	22707	+	99.65	85.28
NM_175624.3	117177	CHM13 CA Conservative 2.5% Error	LBLQ01000253.1	115	22707	+	99.65	86.49
NM_001024647.3	117177	CHM13 CA Conservative 2.5% Error	LBLQ01000253.1	115	22707	+	99.66	93
NM_001278402.1	117177	CHM13 CA Conservative 2.5% Error	LBLQ01000253.1	115	22707	+	99.66	93.9
NM_014923.4	22862	CHM13 CA Conservative 2.5% Error	LBLQ01002796.1	3017157	3059694	-	100	84.67
NM_014923.4	22862	CHM13 CA Conservative 2.5% Error	LBLQ01000033.1	12579	48221	-	100	15.28
NM_001278438.1	22862	CHM13 CA Conservative 2.5% Error	LBLQ01002796.1	3017157	3059694	-	100	79.06
NM_001278438.1	22862	CHM13 CA Conservative 2.5% Error	LBLQ01000033.1	12579	181917	-	100	20.87
NM_130773.3	129684	CHM13 CA Conservative 2.5% Error	LBLQ01002491.1	9258	507506	+	99.97	86.15
NM_130773.3	129684	CHM13 CA Conservative 2.5% Error	LBLQ01001525.1	164311	381393	-	100	13.85
NM_005560.4	3911	CHM13 CA Conservative 2.5% Error	LBLQ01005682.1	1347063	1396732	+	99.63	64
NM_005560.4	3911	CHM13 CA Conservative 2.5% Error	LBLQ01000903.1	485	9188	+	99.82	35.92
NM_018078.3	55132	CHM13 CA Conservative 2.5% Error	LBLQ01000803.1	911882	913054	-	75.62	28.07
NM_178043.2	55132	CHM13 CA Conservative 2.5% Error	LBLQ01000803.1	911882	913054	-	75.62	59.36
NM_001198832.2	9659	CHM13 CA Conservative 2.5% Error	LBLQ01000643.1	1935	83737	+	99.44	85.88
NM_001198832.2	9659	CHM13 CA Conservative 2.5% Error	LBLQ01000636.1	2297	70565	+	97.27	8.42
NM_001198832.2	9659	CHM13 CA Conservative 2.5% Error	LBLQ01000634.1	46905	57877	+	97.4	5.65
NM_001198834.3	9659	CHM13 CA Conservative 2.5% Error	LBLQ01000643.1	11040	83737	+	99.59	88.72
NM_001198834.3	9659	CHM13 CA Conservative 2.5% Error	LBLQ01000636.1	28469	70565	+	97.55	9.7
NM_014644.5	9659	CHM13 CA Conservative 2.5% Error	LBLQ01000643.1	11040	83737	+	99.59	88.8
NM_014644.5	9659	CHM13 CA Conservative 2.5% Error	LBLQ01000636.1	28469	70565	+	97.55	9.64
NM_001002812.2	9659	CHM13 CA Conservative 2.5% Error	LBLQ01000643.1	11040	44277	+	99.79	80.59
NM_001002812.2	9659	CHM13 CA Conservative 2.5% Error	LBLQ01000636.1	28469	70565	+	97.55	16.7
NM_016134.3	10404	CHM13 CA Conservative 2.5% Error	LBLQ01002286.1	2641267	3025566	+	100	65.05
NM_016134.3	10404	CHM13 CA Conservative 2.5% Error	LBLQ01001642.1	2901	116974	+	100	39.96
NM_032999.3	2969	CHM13 CA Conservative 2.5% Error	LBLQ01001085.1	68114	100021	-	99.81	70.57
NM_033000.3	2969	CHM13 CA Conservative 2.5% Error	LBLQ01001085.1	68114	100021	-	99.81	71.51
NM_033001.3	2969	CHM13 CA Conservative 2.5% Error	LBLQ01001085.1	68114	100016	-	99.87	71.45
NM_001518.4	2969	CHM13 CA Conservative 2.5% Error	LBLQ01001085.1	68114	100016	-	99.87	72.41
NM_001163636.2	2969	CHM13 CA Conservative 2.5% Error	LBLQ01001085.1	68114	100016	-	99.87	71.5
NM_173537.3	84163	CHM13 CA Conservative 2.5% Error	LBLQ01001085.1	3723	32645	+	99.77	87.35
NM_001281447.1	84163	CHM13 CA Conservative 2.5% Error	LBLQ01001083.1	41719	41929	+	100	32.56
NM_001042603.2	5927	CHM13 CA Conservative 2.5% Error	LBLQ01002947.1	9700	95774	+	100	93.28
NM_001042603.2	5927	CHM13 CA Conservative 2.5% Error	LBLQ01001547.1	14060	19484	-	99.86	6.72
NM_024318.3	79168	CHM13 CA Conservative 2.5% Error	LBLQ01002519.1	624272	627105	+	97.57	90.6
NM_138737.4	9843	CHM13 CA Conservative 2.5% Error	LBLQ01002499.1	671177	750187	-	100	78.74
NM_138737.4	9843	CHM13 CA Conservative 2.5% Error	LBLQ01002704.1	774673	785926	+	99.89	21.24
NM_001130860.3	9843	CHM13 CA Conservative 2.5% Error	LBLQ01002499.1	671177	758137	-	99.5	81.88
NM_001130860.3	9843	CHM13 CA Conservative 2.5% Error	LBLQ01002704.1	776354	785926	+	100	19.72
NM_001282141.1	9843	CHM13 CA Conservative 2.5% Error	LBLQ01002499.1	671177	758137	-	99.41	79.2
NM_001282141.1	9843	CHM13 CA Conservative 2.5% Error	LBLQ01002704.1	776354	785926	+	100	22.63
NM_001282218.1	9024	CHM13 CA Conservative 2.5% Error	LBLQ01002998.1	543061	555967	-	99.64	61.27
NM_001282218.1	9024	CHM13 CA Conservative 2.5% Error	LBLQ01002999.1	1783	44809	-	99.51	45.06
NM_001282506.1	200958	CHM13 CA Conservative 2.5% Error	LBLQ01001972.1	68304	80441	+	99.47	80.2
NM_001282855.1	154865	CHM13 CA Conservative 2.5% Error	LBLQ01008274.1	25507804	25508377	-	99.12	16.33
NM_001283009.1	51750	CHM13 CA Conservative 2.5% Error	LBLQ01005682.1	2748	38167	-	99.63	74.51
NM_001283009.1	51750	CHM13 CA Conservative 2.5% Error	LBLQ01008193.1	278897	280781	-	99.77	25.54
NM_001283010.1	51750	CHM13 CA Conservative 2.5% Error	LBLQ01005682.1	2748	38167	-	99.63	75.69
NM_001283010.1	51750	CHM13 CA Conservative 2.5% Error	LBLQ01008193.1	278897	280781	-	99.73	24.35
NM_007270.4	11328	CHM13 CA Conservative 2.5% Error	LBLQ01007866.1	2086704	2119024	-	99.87	88.91
NM_001284341.1	11328	CHM13 CA Conservative 2.5% Error	LBLQ01007866.1	2086704	2119020	-	99.9	84.89
NM_001285444.1	23042	CHM13 CA Conservative 2.5% Error	LBLQ01004055.1	51506	85661	-	99.97	91.3
NM_001285448.1	23042	CHM13 CA Conservative 2.5% Error	LBLQ01004055.1	51506	86613	-	99.47	93.17
NM_001285445.1	23042	CHM13 CA Conservative 2.5% Error	LBLQ01004055.1	51506	85661	-	99.97	91.36
NM_001285450.1	23042	CHM13 CA Conservative 2.5% Error	LBLQ01004055.1	60032	88077	-	99.84	82.86
NM_001285449.1	23042	CHM13 CA Conservative 2.5% Error	LBLQ01004055.1	36980	88077	-	96.9	68.34
NM_015027.3	23042	CHM13 CA Conservative 2.5% Error	LBLQ01004055.1	51506	88077	-	99.97	91.54
NM_152730.5	221322	CHM13 CA Conservative 2.5% Error	LBLQ01001447.1	3008180	3182660	+	99.68	55.62
NM_152730.5	221322	CHM13 CA Conservative 2.5% Error	LBLQ01000781.1	253931	335510	-	99.71	48.79
NM_002457.3	4583	CHM13 CA Conservative 2.5% Error	LBLQ01002999.1	344562	362787	-	96.57	67.38
NM_002457.3	4583	CHM13 CA Conservative 2.5% Error	LBLQ01006543.1	29	12039	-	99.86	18.97
NM_001286568.1	84083	CHM13 CA Conservative 2.5% Error	LBLQ01000393.1	1583042	1661871	-	99.96	82.75
NM_001286568.1	84083	CHM13 CA Conservative 2.5% Error	LBLQ01000394.1	18325	249629	-	99.17	17.77
NM_032143.3	84083	CHM13 CA Conservative 2.5% Error	LBLQ01000393.1	1583042	1661871	-	99.96	83.93
NM_032143.3	84083	CHM13 CA Conservative 2.5% Error	LBLQ01000394.1	26943	250135	-	99.02	16.7
NM_017820.4	54932	CHM13 CA Conservative 2.5% Error	LBLQ01008674.1	25836	103230	-	99.77	76.01
NM_017820.4	54932	CHM13 CA Conservative 2.5% Error	LBLQ01005972.1	15200	18010	+	100	17.58
NM_001024916.3	220869	CHM13 CA Conservative 2.5% Error	LBLQ01002765.1	923	43985	-	99.71	64.39
NM_001024916.3	220869	CHM13 CA Conservative 2.5% Error	LBLQ01002552.1	1645	18689	-	98.36	41.19
NM_001026383.2	79741	CHM13 CA Conservative 2.5% Error	LBLQ01001011.1	5194964	5211571	-	92.58	24.18
NM_145023.5	79741	CHM13 CA Conservative 2.5% Error	LBLQ01001011.1	5194964	5195389	-	93.42	19.48
NM_001287499.1	23288	CHM13 CA Conservative 2.5% Error	LBLQ01003146.1	13471	24709	-	98.32	35.52
NM_001287500.1	23288	CHM13 CA Conservative 2.5% Error	LBLQ01003146.1	13471	24709	-	98.32	36.21
NM_001287501.1	23288	CHM13 CA Conservative 2.5% Error	LBLQ01003146.1	6306	24709	-	98.99	77.22
NM_001287502.1	23288	CHM13 CA Conservative 2.5% Error	LBLQ01003146.1	13471	24709	-	98.32	36.9
NM_152558.4	23288	CHM13 CA Conservative 2.5% Error	LBLQ01003146.1	6306	24709	-	98.99	76.17
NM_138570.3	124565	CHM13 CA Conservative 2.5% Error	LBLQ01005969.1	1250991	1286093	+	99.82	54.62
NM_138570.3	124565	CHM13 CA Conservative 2.5% Error	LBLQ01005970.1	5666	15197	+	99.87	50.35
NM_001037984.2	124565	CHM13 CA Conservative 2.5% Error	LBLQ01005969.1	1250991	1286093	+	99.82	37.55
NM_001037984.2	124565	CHM13 CA Conservative 2.5% Error	LBLQ01005970.1	5666	13877	+	99.75	18.19
NM_001037984.2	124565	CHM13 CA Conservative 2.5% Error	LBLQ01001851.1	2106077	2108325	-	99.75	45.05
NM_001288707.1	101929372	CHM13 CA Conservative 2.5% Error	LBLQ01002466.1	1026	2354	-	99.92	72.3
NM_001288707.1	101929372	CHM13 CA Conservative 2.5% Error	LBLQ01007239.1	1	1367	+	100	19.85
NM_006157.4	4745	CHM13 CA Conservative 2.5% Error	LBLQ01000580.1	1763046	2329613	+	99.54	53.51
NM_006157.4	4745	CHM13 CA Conservative 2.5% Error	LBLQ01000581.1	106561	311376	+	99.87	47.46
NM_201551.2	4745	CHM13 CA Conservative 2.5% Error	LBLQ01000580.1	1763046	2322840	+	99.94	55.03
NM_201551.2	4745	CHM13 CA Conservative 2.5% Error	LBLQ01000581.1	106561	311376	+	99.85	45.09
NM_001288713.1	4745	CHM13 CA Conservative 2.5% Error	LBLQ01000580.1	1763046	2329613	+	99.56	54.68
NM_001288713.1	4745	CHM13 CA Conservative 2.5% Error	LBLQ01000581.1	106561	311376	+	99.87	46.27
NM_001288714.1	4745	CHM13 CA Conservative 2.5% Error	LBLQ01000580.1	1763046	2329613	+	99.49	50.95
NM_001288714.1	4745	CHM13 CA Conservative 2.5% Error	LBLQ01000581.1	106561	311376	+	99.87	50.08
NM_001288813.1	51326	CHM13 CA Conservative 2.5% Error	LBLQ01005982.1	13822	15595	+	100	81.75
NM_001288812.1	51326	CHM13 CA Conservative 2.5% Error	LBLQ01002021.1	17336	17577	-	93.87	32.26
NM_001288811.1	51326	CHM13 CA Conservative 2.5% Error	LBLQ01005982.1	4242	15595	+	99.94	82.5
NM_201400.3	196483	CHM13 CA Conservative 2.5% Error	LBLQ01001768.1	2089	3525	+	99.86	59.64
NM_201400.3	196483	CHM13 CA Conservative 2.5% Error	LBLQ01010322.1	377	11695	-	96.99	42.59
NM_201598.3	196483	CHM13 CA Conservative 2.5% Error	LBLQ01001768.1	2089	3525	+	99.86	62.28
NM_201598.3	196483	CHM13 CA Conservative 2.5% Error	LBLQ01010322.1	377	11695	-	96.98	40.06
NM_001289029.1	196483	CHM13 CA Conservative 2.5% Error	LBLQ01001768.1	2089	3525	+	99.86	64.55
NM_001289029.1	196483	CHM13 CA Conservative 2.5% Error	LBLQ01010322.1	377	11695	-	96.93	37.88
NM_032194.2	84154	CHM13 CA Conservative 2.5% Error	LBLQ01001162.1	2256	14788	+	99.68	84.83
NM_032194.2	84154	CHM13 CA Conservative 2.5% Error	LBLQ01001161.1	1225550	1251671	+	99.65	15.68
NM_001289117.1	27231	CHM13 CA Conservative 2.5% Error	LBLQ01002528.1	1312	1906	-	100	27.31
NM_001289117.1	27231	CHM13 CA Conservative 2.5% Error	LBLQ01001573.1	958	3477	+	99.61	45.22
NM_001289111.1	84154	CHM13 CA Conservative 2.5% Error	LBLQ01001162.1	2256	14788	+	99.68	85.71
NM_001289111.1	84154	CHM13 CA Conservative 2.5% Error	LBLQ01001161.1	1225550	1251671	+	99.63	14.81
NM_001014812.2	84191	CHM13 CA Conservative 2.5% Error	LBLQ01001412.1	428618	445748	+	88.67	83.58
NM_031466.6	83696	CHM13 CA Conservative 2.5% Error	LBLQ01004420.1	745153	1318139	+	99.94	75.08
NM_031466.6	83696	CHM13 CA Conservative 2.5% Error	LBLQ01004421.1	37191	39050	+	100	24.81
NM_176820.3	338321	CHM13 CA Conservative 2.5% Error	LBLQ01004031.1	2865966	2887627	+	99.95	67.73
NM_176820.3	338321	CHM13 CA Conservative 2.5% Error	LBLQ01008427.1	21701	25860	-	100	27.43
NM_001258412.2	115584	CHM13 CA Conservative 2.5% Error	LBLQ01001386.1	1094	27396	-	100	28.23
NM_001258412.2	115584	CHM13 CA Conservative 2.5% Error	LBLQ01001385.1	3424355	3466537	-	99.82	74.36
NM_001160372.2	83696	CHM13 CA Conservative 2.5% Error	LBLQ01004420.1	745970	1318139	+	99.93	74.07
NM_001160372.2	83696	CHM13 CA Conservative 2.5% Error	LBLQ01004421.1	37191	39050	+	100	25.81
NM_052944.4	115584	CHM13 CA Conservative 2.5% Error	LBLQ01001386.1	3307	27028	-	100	23.06
NM_052944.4	115584	CHM13 CA Conservative 2.5% Error	LBLQ01001385.1	3424355	3466576	-	98.75	78.47
NM_001258411.2	115584	CHM13 CA Conservative 2.5% Error	LBLQ01001386.1	1094	27396	-	100	31.36
NM_001258411.2	115584	CHM13 CA Conservative 2.5% Error	LBLQ01001385.1	3424355	3466576	-	98.68	72.65
NM_015215.3	23261	CHM13 CA Conservative 2.5% Error	LBLQ01001058.1	63763	367263	+	99.97	92.38
NM_001289931.1	255403	CHM13 CA Conservative 2.5% Error	LBLQ01002615.1	1586808	1590058	-	99.93	90.45
NM_001039127.5	255403	CHM13 CA Conservative 2.5% Error	LBLQ01002615.1	1586808	1620397	-	99.74	94.84
NM_001289930.1	255403	CHM13 CA Conservative 2.5% Error	LBLQ01002615.1	1586808	1620397	-	99.78	95.66
NM_001289953.1	388561	CHM13 CA Conservative 2.5% Error	LBLQ01001070.1	204624	254773	+	86.57	78.72
NM_001127391.2	130540	CHM13 CA Conservative 2.5% Error	LBLQ01008274.1	27064337	27133019	+	99.87	78.12
NM_001289993.1	130540	CHM13 CA Conservative 2.5% Error	LBLQ01008274.1	27064337	27133019	+	99.92	74.06
NM_139163.3	130540	CHM13 CA Conservative 2.5% Error	LBLQ01008274.1	27064337	27133019	+	99.88	78.81
NM_207355.3	102724631	CHM13 CA Conservative 2.5% Error	LBLQ01002053.1	1396	22381	-	99.16	77.9
NM_001290118.1	100652748	CHM13 CA Conservative 2.5% Error	LBLQ01001550.1	5298	28023	+	100	86.29
NM_001290118.1	100652748	CHM13 CA Conservative 2.5% Error	LBLQ01001516.1	37639	37929	+	93.37	12.05
NM_001290117.1	100652748	CHM13 CA Conservative 2.5% Error	LBLQ01001550.1	5298	28023	+	100	87.07
NM_001290117.1	100652748	CHM13 CA Conservative 2.5% Error	LBLQ01001516.1	37639	37929	+	93.37	11.36
NM_001290210.1	100131827	CHM13 CA Conservative 2.5% Error	LBLQ01009351.1	4960	7122	+	99.44	60.13
NM_001290210.1	100131827	CHM13 CA Conservative 2.5% Error	LBLQ01010332.1	16983	19267	-	98.87	21.62
NM_001101663.4	200030	CHM13 CA Conservative 2.5% Error	LBLQ01000641.1	23685	42705	-	98.35	80.05
NM_001101663.4	200030	CHM13 CA Conservative 2.5% Error	LBLQ01002554.1	1375	20837	-	96.59	27.41
NM_001290209.1	100131827	CHM13 CA Conservative 2.5% Error	LBLQ01009751.1	20270	22737	-	98.39	82.56
NM_001290209.1	100131827	CHM13 CA Conservative 2.5% Error	LBLQ01010332.1	14890	19267	-	99.33	10.01
NM_001290208.1	100131827	CHM13 CA Conservative 2.5% Error	LBLQ01009751.1	20270	22737	-	98.39	83.37
NM_001290208.1	100131827	CHM13 CA Conservative 2.5% Error	LBLQ01010332.1	16983	19267	-	98.87	8.95
NM_183372.5	200030	CHM13 CA Conservative 2.5% Error	LBLQ01000641.1	23685	42450	-	98.5	67.2
NM_183372.5	200030	CHM13 CA Conservative 2.5% Error	LBLQ01002554.1	1375	29714	-	91.67	34.63
NM_130797.3	1804	CHM13 CA Conservative 2.5% Error	LBLQ01001946.1	272939	747017	+	99.22	87.88
NM_130797.3	1804	CHM13 CA Conservative 2.5% Error	LBLQ01006260.1	45276	45930	-	99.23	13.53
NM_001290253.1	1804	CHM13 CA Conservative 2.5% Error	LBLQ01001946.1	272939	441703	+	99.02	71.02
NM_001290253.1	1804	CHM13 CA Conservative 2.5% Error	LBLQ01006260.1	45284	45930	-	99.84	31.31
NM_207303.4	26033	CHM13 CA Conservative 2.5% Error	LBLQ01001392.1	4962541	5696006	-	99.91	80.17
NM_207303.4	26033	CHM13 CA Conservative 2.5% Error	LBLQ01001295.1	8566	105838	-	98.59	21.12
NM_001201380.2	728577	CHM13 CA Conservative 2.5% Error	LBLQ01001682.1	211	61794	+	99.26	64.1
NM_001201380.2	728577	CHM13 CA Conservative 2.5% Error	LBLQ01001680.1	21095	81502	+	98.89	26.74
NM_001201380.2	728577	CHM13 CA Conservative 2.5% Error	LBLQ01002988.1	16952	41850	+	99.5	9.51
NM_001291314.1	5554	CHM13 CA Conservative 2.5% Error	LBLQ01001380.1	1594507	1881278	+	99.81	94.63
NM_001291315.1	5554	CHM13 CA Conservative 2.5% Error	LBLQ01001380.1	1594507	1881278	+	99.79	94.01
NM_033486.2	984	CHM13 CA Conservative 2.5% Error	LBLQ01000823.1	838337	848364	-	99.37	77.19
NM_001787.2	984	CHM13 CA Conservative 2.5% Error	LBLQ01000823.1	838337	848364	-	99.38	77.48
NM_033489.2	984	CHM13 CA Conservative 2.5% Error	LBLQ01000823.1	838337	848364	-	99.37	76.03
NM_001291345.1	984	CHM13 CA Conservative 2.5% Error	LBLQ01000823.1	838337	848364	-	99.37	77.95
NM_000947.4	5558	CHM13 CA Conservative 2.5% Error	LBLQ01001243.1	7910	42832	-	92.45	34.66
NM_000947.4	5558	CHM13 CA Conservative 2.5% Error	LBLQ01003699.1	607	48966	-	96.27	51.29
NM_000947.4	5558	CHM13 CA Conservative 2.5% Error	LBLQ01000441.1	23112	53351	-	100	14.08
NM_001276343.2	119016	CHM13 CA Conservative 2.5% Error	LBLQ01005650.1	119675	128195	-	99.74	79.2
NM_001276343.2	119016	CHM13 CA Conservative 2.5% Error	LBLQ01000491.1	4173	20217	+	99.54	26.11
NM_133446.3	119016	CHM13 CA Conservative 2.5% Error	LBLQ01005650.1	119675	128198	-	99.69	81.56
NM_133446.3	119016	CHM13 CA Conservative 2.5% Error	LBLQ01000491.1	4173	20217	+	99.49	24.03
NM_001145064.2	729438	CHM13 CA Conservative 2.5% Error	LBLQ01007775.1	40952	64448	+	99.83	96.67
NM_152286.4	375775	CHM13 CA Conservative 2.5% Error	LBLQ01008674.1	139465	181344	-	99.93	62.91
NM_152286.4	375775	CHM13 CA Conservative 2.5% Error	LBLQ01001421.1	666383	711315	+	100	33.95
NM_001098537.2	375775	CHM13 CA Conservative 2.5% Error	LBLQ01008674.1	139465	181344	-	99.93	61.93
NM_001098537.2	375775	CHM13 CA Conservative 2.5% Error	LBLQ01001421.1	666383	711315	+	100	34.97
NM_001017975.4	164045	CHM13 CA Conservative 2.5% Error	LBLQ01000310.1	5462395	5563861	+	99.41	72.25
NM_001017975.4	164045	CHM13 CA Conservative 2.5% Error	LBLQ01008422.1	25262	41565	+	99.79	29.38
NM_001291821.1	445571	CHM13 CA Conservative 2.5% Error	LBLQ01002765.1	900	42381	-	99.91	68.91
NM_001291821.1	445571	CHM13 CA Conservative 2.5% Error	LBLQ01002552.1	1632	18633	-	97.71	34.03
NM_201453.3	445571	CHM13 CA Conservative 2.5% Error	LBLQ01002765.1	900	43985	-	99.83	69.93
NM_201453.3	445571	CHM13 CA Conservative 2.5% Error	LBLQ01002552.1	1632	18633	-	97.92	36.33
NM_001145440.2	441250	CHM13 CA Conservative 2.5% Error	LBLQ01000910.1	1445395	1584670	-	100	57.2
NM_001145440.2	441250	CHM13 CA Conservative 2.5% Error	LBLQ01000914.1	4443	35817	-	99.9	31.69
NM_032351.5	84311	CHM13 CA Conservative 2.5% Error	LBLQ01005118.1	6876	23492	+	99.91	69.32
NM_032351.5	84311	CHM13 CA Conservative 2.5% Error	LBLQ01000498.1	2353	11976	+	99.04	36.41
NM_001278279.2	84311	CHM13 CA Conservative 2.5% Error	LBLQ01005118.1	6876	23492	+	99.9	66.36
NM_001278279.2	84311	CHM13 CA Conservative 2.5% Error	LBLQ01000498.1	2353	11976	+	99.04	39.88
NM_000842.4	2915	CHM13 CA Conservative 2.5% Error	LBLQ01000751.1	860083	1205761	-	99.94	86.77
NM_000842.4	2915	CHM13 CA Conservative 2.5% Error	LBLQ01008406.1	55013	278371	-	97.86	16.45
NM_001292009.1	346007	CHM13 CA Conservative 2.5% Error	LBLQ01001067.1	2286816	3869448	-	99.96	78.39
NM_001292009.1	346007	CHM13 CA Conservative 2.5% Error	LBLQ01001069.1	24721	394682	-	100	21.62
NM_015570.3	26053	CHM13 CA Conservative 2.5% Error	LBLQ01000909.1	514095	608610	+	99.92	78.36
NM_015570.3	26053	CHM13 CA Conservative 2.5% Error	LBLQ01000980.1	58926	594684	-	100	21.12
NM_001127231.2	26053	CHM13 CA Conservative 2.5% Error	LBLQ01000909.1	514095	608610	+	99.92	78.12
NM_001127231.2	26053	CHM13 CA Conservative 2.5% Error	LBLQ01000980.1	58926	594684	-	100	21.35
NM_001127232.2	26053	CHM13 CA Conservative 2.5% Error	LBLQ01000980.1	75264	594684	-	100	74.42
NM_001127232.2	26053	CHM13 CA Conservative 2.5% Error	LBLQ01000909.1	105116	105534	+	100	23.09
NM_001293798.1	100288687	CHM13 CA Conservative 2.5% Error	LBLQ01005975.1	100	1033	-	95.35	50.12
NM_182543.3	221078	CHM13 CA Conservative 2.5% Error	LBLQ01000839.1	17227733	17293463	+	99.85	52.8
NM_182543.3	221078	CHM13 CA Conservative 2.5% Error	LBLQ01001868.1	2627865	2634650	-	99.26	47.31
NM_001297740.1	6902	CHM13 CA Conservative 2.5% Error	LBLQ01000318.1	2298305	2298498	+	93.87	32.37
NM_001300738.1	154215	CHM13 CA Conservative 2.5% Error	LBLQ01000668.1	20776	28030	+	99.84	73.49
NM_001300738.1	154215	CHM13 CA Conservative 2.5% Error	LBLQ01001447.1	50345	537988	-	98.61	16.81
NM_001300738.1	154215	CHM13 CA Conservative 2.5% Error	LBLQ01001446.1	14013	450745	-	99.44	10.59
NM_001300740.1	154215	CHM13 CA Conservative 2.5% Error	LBLQ01000668.1	1675	28030	+	99.18	84.88
NM_001300740.1	154215	CHM13 CA Conservative 2.5% Error	LBLQ01001446.1	14013	450745	-	99.42	11.44
NM_001300737.1	154215	CHM13 CA Conservative 2.5% Error	LBLQ01000668.1	1675	28030	+	99.18	74.42
NM_001300737.1	154215	CHM13 CA Conservative 2.5% Error	LBLQ01001447.1	59112	537988	-	99.83	17.67
NM_001300737.1	154215	CHM13 CA Conservative 2.5% Error	LBLQ01001446.1	14013	450745	-	99.42	10.03
NM_001040214.2	154215	CHM13 CA Conservative 2.5% Error	LBLQ01000668.1	1675	28030	+	99.18	75.83
NM_001040214.2	154215	CHM13 CA Conservative 2.5% Error	LBLQ01001447.1	59112	537988	-	99.81	16.12
NM_001040214.2	154215	CHM13 CA Conservative 2.5% Error	LBLQ01001446.1	14013	450745	-	99.42	10.22
NM_153355.4	154215	CHM13 CA Conservative 2.5% Error	LBLQ01000668.1	17209	28030	+	99.52	79.73
NM_153355.4	154215	CHM13 CA Conservative 2.5% Error	LBLQ01001447.1	59112	537988	-	99.81	17.13
NM_001029998.4	84068	CHM13 CA Conservative 2.5% Error	LBLQ01000023.1	4873974	4933776	-	99.38	81.48
NM_001029998.4	84068	CHM13 CA Conservative 2.5% Error	LBLQ01002829.1	1757	217791	-	100	21.36
NM_001300842.1	84068	CHM13 CA Conservative 2.5% Error	LBLQ01000023.1	4873974	4933776	-	99.4	82.01
NM_001300842.1	84068	CHM13 CA Conservative 2.5% Error	LBLQ01002829.1	1757	217791	-	100	20.75
NM_001300940.1	144577	CHM13 CA Conservative 2.5% Error	LBLQ01007240.1	7315	15664	+	100	78.85
NM_001300940.1	144577	CHM13 CA Conservative 2.5% Error	LBLQ01000252.1	8760	26622	-	96.97	24.14
NM_001300941.1	144577	CHM13 CA Conservative 2.5% Error	LBLQ01007240.1	7311	9336	+	99.9	82.99
NM_001300941.1	144577	CHM13 CA Conservative 2.5% Error	LBLQ01000252.1	1006	26622	-	94.51	21.98
NM_015326.4	23380	CHM13 CA Conservative 2.5% Error	LBLQ01002296.1	5470	54018	+	99.79	71.9
NM_015326.4	23380	CHM13 CA Conservative 2.5% Error	LBLQ01002295.1	2003	25343	+	95.68	14.98
NM_015326.4	23380	CHM13 CA Conservative 2.5% Error	LBLQ01002292.1	35592	106870	+	98.39	10.98
NM_001170637.3	23380	CHM13 CA Conservative 2.5% Error	LBLQ01002296.1	5470	54018	+	99.79	71.93
NM_001170637.3	23380	CHM13 CA Conservative 2.5% Error	LBLQ01002295.1	2003	25343	+	95.67	14.94
NM_001170637.3	23380	CHM13 CA Conservative 2.5% Error	LBLQ01002292.1	35592	106870	+	98.39	10.98
NM_001300952.1	23380	CHM13 CA Conservative 2.5% Error	LBLQ01002296.1	5470	45744	+	100	61.46
NM_001300952.1	23380	CHM13 CA Conservative 2.5% Error	LBLQ01002295.1	2003	25343	+	95.67	20.6
NM_001300952.1	23380	CHM13 CA Conservative 2.5% Error	LBLQ01002292.1	35592	106870	+	98.39	15.14
NM_001301064.1	54700	CHM13 CA Conservative 2.5% Error	LBLQ01004055.1	3577	29813	+	100	90.4
NM_018427.4	54700	CHM13 CA Conservative 2.5% Error	LBLQ01004055.1	3377	29813	+	99.97	90.76
NM_024848.2	79906	CHM13 CA Conservative 2.5% Error	LBLQ01008202.1	10332	65604	-	100	79.06
NM_024848.2	79906	CHM13 CA Conservative 2.5% Error	LBLQ01000825.1	623361	623687	-	99.69	17.75
NM_000769.2	1557	CHM13 CA Conservative 2.5% Error	LBLQ01008883.1	7277995	7335965	+	99.89	54.8
NM_000769.2	1557	CHM13 CA Conservative 2.5% Error	LBLQ01009815.1	296159	328858	-	99.89	52.93
NM_032167.4	92017	CHM13 CA Conservative 2.5% Error	LBLQ01002114.1	402	529252	+	99.46	93.82
NM_032167.4	92017	CHM13 CA Conservative 2.5% Error	LBLQ01002113.1	849291	919026	+	100	7.01
NM_001301685.1	130940	CHM13 CA Conservative 2.5% Error	LBLQ01003137.1	5342218	5348958	-	99.21	63.17
NM_001301685.1	130940	CHM13 CA Conservative 2.5% Error	LBLQ01001468.1	672	99026	-	99.14	38
NM_001302371.1	100132406	CHM13 CA Conservative 2.5% Error	LBLQ01000690.1	156	33458	-	97.73	45.4
NM_001302371.1	100132406	CHM13 CA Conservative 2.5% Error	LBLQ01000697.1	465	20119	-	95.36	21.49
NM_138796.3	128153	CHM13 CA Conservative 2.5% Error	LBLQ01000884.1	44738	170642	+	99.67	80.55
NM_138796.3	128153	CHM13 CA Conservative 2.5% Error	LBLQ01000330.1	6635969	6688011	+	99.34	19.91
NM_152888.2	169044	CHM13 CA Conservative 2.5% Error	LBLQ01004422.1	282	128656	+	99.94	54.04
NM_152888.2	169044	CHM13 CA Conservative 2.5% Error	LBLQ01004421.1	855971	1054972	+	99.83	46.88
NM_001303255.1	374819	CHM13 CA Conservative 2.5% Error	LBLQ01001763.1	18170	39496	-	98.72	93.38
NM_199340.3	374819	CHM13 CA Conservative 2.5% Error	LBLQ01001763.1	18170	39496	-	98.69	41.63
NM_199340.3	374819	CHM13 CA Conservative 2.5% Error	LBLQ01001767.1	9273	21710	-	98.69	58.74
NM_001303279.1	4642	CHM13 CA Conservative 2.5% Error	LBLQ01000370.1	11012	196381	-	99.47	70.28
NM_001303279.1	4642	CHM13 CA Conservative 2.5% Error	LBLQ01001882.1	25770	90926	+	100	31.6
NM_014695.2	9720	CHM13 CA Conservative 2.5% Error	LBLQ01001982.1	6834	61336	-	99.3	69.24
NM_014695.2	9720	CHM13 CA Conservative 2.5% Error	LBLQ01001776.1	10239	32144	+	99.27	30.7
NM_015194.2	4642	CHM13 CA Conservative 2.5% Error	LBLQ01000370.1	31163	196381	-	99.95	43.35
NM_015194.2	4642	CHM13 CA Conservative 2.5% Error	LBLQ01001882.1	25770	192907	+	100	56.48
NM_031481.2	83733	CHM13 CA Conservative 2.5% Error	LBLQ01002466.1	297	4052	+	100	55.79
NM_031481.2	83733	CHM13 CA Conservative 2.5% Error	LBLQ01007239.1	102	18083	-	99.59	34.57
NM_001303484.1	83733	CHM13 CA Conservative 2.5% Error	LBLQ01002466.1	297	4052	+	100	57.48
NM_001303484.1	83733	CHM13 CA Conservative 2.5% Error	LBLQ01007239.1	102	18083	-	99.56	32.59
NM_003631.3	8505	CHM13 CA Conservative 2.5% Error	LBLQ01001541.1	105771	203554	-	99.95	54.3
NM_003631.3	8505	CHM13 CA Conservative 2.5% Error	LBLQ01001518.1	5267	15203	-	99.65	40.77
NM_001303486.1	8505	CHM13 CA Conservative 2.5% Error	LBLQ01001541.1	105771	203554	-	99.95	60.34
NM_001303486.1	8505	CHM13 CA Conservative 2.5% Error	LBLQ01001518.1	5267	15203	-	99.54	34.21
NM_001303487.1	8505	CHM13 CA Conservative 2.5% Error	LBLQ01001541.1	105771	203554	-	99.95	55.16
NM_001303487.1	8505	CHM13 CA Conservative 2.5% Error	LBLQ01001518.1	5267	15203	-	99.64	39.83
NM_001303489.1	8505	CHM13 CA Conservative 2.5% Error	LBLQ01001541.1	105883	203553	-	99.95	75.33
NM_001303489.1	8505	CHM13 CA Conservative 2.5% Error	LBLQ01001518.1	6651	15203	-	98.23	19.12
NM_001304523.1	8379	CHM13 CA Conservative 2.5% Error	LBLQ01001123.1	630031	829335	-	99.91	48.33
NM_001304523.1	8379	CHM13 CA Conservative 2.5% Error	LBLQ01001125.1	34232	197801	-	99.92	51.45
NM_001304524.1	8379	CHM13 CA Conservative 2.5% Error	LBLQ01001123.1	630031	829335	-	99.91	51.65
NM_001304524.1	8379	CHM13 CA Conservative 2.5% Error	LBLQ01001125.1	34232	197801	-	99.91	48.14
NM_006661.3	10846	CHM13 CA Conservative 2.5% Error	LBLQ01002084.1	4492926	4509144	-	100	73.6
NM_006661.3	10846	CHM13 CA Conservative 2.5% Error	LBLQ01002085.1	3175	286647	-	100	26.43
NM_001306068.1	100288687	CHM13 CA Conservative 2.5% Error	LBLQ01009493.1	125079	126035	-	96.89	31.92
NM_001306090.1	2121	CHM13 CA Conservative 2.5% Error	LBLQ01002819.1	3130293	3161062	-	99.87	73.11
NM_001306090.1	2121	CHM13 CA Conservative 2.5% Error	LBLQ01008874.1	1499005	1544180	+	99.71	27.19
NM_001306084.1	144535	CHM13 CA Conservative 2.5% Error	LBLQ01008573.1	15430193	15662878	+	99.81	70.23
NM_001306084.1	144535	CHM13 CA Conservative 2.5% Error	LBLQ01008575.1	13678	149023	+	99.85	28.39
NM_182530.2	196446	CHM13 CA Conservative 2.5% Error	LBLQ01000253.1	24834	136300	+	99.91	77.21
NM_001306135.1	220107	CHM13 CA Conservative 2.5% Error	LBLQ01000586.1	1019655	1020036	-	99.21	27.92
NM_001308117.1	54715	CHM13 CA Conservative 2.5% Error	LBLQ01008876.1	91262	750459	+	100	81.71
NM_001308117.1	54715	CHM13 CA Conservative 2.5% Error	LBLQ01005138.1	755684	1390872	+	100	18.52
NM_198567.5	375484	CHM13 CA Conservative 2.5% Error	LBLQ01005673.1	15882	67604	+	100	86.52
NM_198567.5	375484	CHM13 CA Conservative 2.5% Error	LBLQ01001428.1	156186	156465	+	99.64	13.4
NM_002847.4	5799	CHM13 CA Conservative 2.5% Error	LBLQ01001950.1	625821	1420895	-	99.91	93.9
NM_002847.4	5799	CHM13 CA Conservative 2.5% Error	LBLQ01001951.1	86102	185889	-	98.7	6.29
NM_130843.3	5799	CHM13 CA Conservative 2.5% Error	LBLQ01001950.1	625821	1420895	-	99.91	93.79
NM_130843.3	5799	CHM13 CA Conservative 2.5% Error	LBLQ01001951.1	86102	185889	-	98.7	6.41
NM_001308267.1	5799	CHM13 CA Conservative 2.5% Error	LBLQ01001950.1	625821	1309379	-	99.9	93.76
NM_001308267.1	5799	CHM13 CA Conservative 2.5% Error	LBLQ01001951.1	86110	185889	-	100	6.28
NM_001308268.1	5799	CHM13 CA Conservative 2.5% Error	LBLQ01001950.1	625821	1420894	-	99.91	91.87
NM_001308268.1	5799	CHM13 CA Conservative 2.5% Error	LBLQ01001951.1	86102	139861	-	99.03	8.29
NM_001310137.1	728888	CHM13 CA Conservative 2.5% Error	LBLQ01001014.1	20364	32873	-	99.6	92.7
NM_001310148.1	440345	CHM13 CA Conservative 2.5% Error	LBLQ01004026.1	12418	25124	-	99.07	84.83
NM_001310148.1	440345	CHM13 CA Conservative 2.5% Error	LBLQ01001017.1	5146	5645	-	100	8.57
NM_001310154.1	400986	CHM13 CA Conservative 2.5% Error	LBLQ01003444.1	2029	70808	+	99.24	41.04
NM_001310154.1	400986	CHM13 CA Conservative 2.5% Error	LBLQ01001930.1	15673	63406	+	94.22	42.71
NM_001310154.1	400986	CHM13 CA Conservative 2.5% Error	LBLQ01010139.1	46395	78226	+	99.87	19.11
NM_001271870.2	647135	CHM13 CA Conservative 2.5% Error	LBLQ01003076.1	1369	20259	+	99.82	86.07
NM_001311200.1	1207	CHM13 CA Conservative 2.5% Error	LBLQ01001727.1	433466	451635	+	89.68	58.22
NM_001311201.1	1207	CHM13 CA Conservative 2.5% Error	LBLQ01001727.1	433466	451635	+	88.48	54.65
NM_001311202.1	1207	CHM13 CA Conservative 2.5% Error	LBLQ01001727.1	450911	451635	+	89.95	61.13
NM_198076.5	116228	CHM13 CA Conservative 2.5% Error	LBLQ01000003.1	850702	865933	-	83.24	13.11
NM_031418.3	63982	CHM13 CA Conservative 2.5% Error	LBLQ01000584.1	5002	217004	+	99.62	93.51
NM_031418.3	63982	CHM13 CA Conservative 2.5% Error	LBLQ01000583.1	833313	945046	+	99.78	7.7
NM_001313726.1	63982	CHM13 CA Conservative 2.5% Error	LBLQ01000584.1	17050	217004	+	99.79	91.02
NM_001313726.1	63982	CHM13 CA Conservative 2.5% Error	LBLQ01000583.1	690307	945046	+	99.81	9.11
NM_016529.5	51761	CHM13 CA Conservative 2.5% Error	LBLQ01001146.1	4251961	4316235	-	99.79	64.87
NM_016529.5	51761	CHM13 CA Conservative 2.5% Error	LBLQ01001147.1	40050	534700	-	99.85	35.18
NM_001313741.1	51761	CHM13 CA Conservative 2.5% Error	LBLQ01001146.1	4251961	4327991	-	99.61	67.46
NM_001313741.1	51761	CHM13 CA Conservative 2.5% Error	LBLQ01001147.1	40050	437701	-	99.83	33.2
NM_002412.4	4255	CHM13 CA Conservative 2.5% Error	LBLQ01000827.1	18882	27329	+	98.89	72.52
NM_002412.4	4255	CHM13 CA Conservative 2.5% Error	LBLQ01002349.1	1004205	1247001	+	97.42	30.61
NM_001001325.2	408187	CHM13 CA Conservative 2.5% Error	LBLQ01000576.1	8727273	8732989	+	97.73	77.99
NM_004476.1	2346	CHM13 Default 5% Error	LBLP01013748.1	29044	88641	-	98.75	85.57
NM_139320.1	89832	CHM13 Default 5% Error	LBLP01002257.1	445291	461067	+	99.68	77.29
NM_139320.1	89832	CHM13 Default 5% Error	LBLP01000350.1	152089	165407	+	100	22.6
NM_177998.1	133060	CHM13 Default 5% Error	LBLP01014372.1	7850	23688	-	99.76	67.73
NM_177998.1	133060	CHM13 Default 5% Error	LBLP01013413.1	3974	4414	-	98.18	23.27
NM_175064.2	285955	CHM13 Default 5% Error	LBLP01014849.1	11709	20896	+	97.38	96.75
NM_017990.3	55066	CHM13 Default 5% Error	LBLP01000059.1	22122	54635	-	99.79	83.52
NM_017990.3	55066	CHM13 Default 5% Error	LBLP01014602.1	6194	14469	-	97.27	14.98
NM_182481.1	85318	CHM13 Default 5% Error	LBLP01014385.1	6202	25794	-	98.87	61.07
NM_182481.1	85318	CHM13 Default 5% Error	LBLP01014383.1	727	9621	-	96.65	22.05
NM_182481.1	85318	CHM13 Default 5% Error	LBLP01001454.1	7559	19250	-	96.44	19.14
NM_182973.1	360200	CHM13 Default 5% Error	LBLP01010873.1	130	28485	-	100	64.55
NM_182973.1	360200	CHM13 Default 5% Error	LBLP01000050.1	1513778	1518018	-	99.82	35.66
NM_012173.3	26260	CHM13 Default 5% Error	LBLP01000914.1	1898092	1917993	-	99.66	74.96
NM_012173.3	26260	CHM13 Default 5% Error	LBLP01001449.1	91505	116239	+	99.4	20.51
NM_183420.1	26260	CHM13 Default 5% Error	LBLP01000914.1	1898092	1917993	-	99.66	73.41
NM_183420.1	26260	CHM13 Default 5% Error	LBLP01001449.1	91505	116241	+	99.4	20.18
NM_183421.1	26260	CHM13 Default 5% Error	LBLP01000914.1	1898092	1917993	-	99.66	73.71
NM_183421.1	26260	CHM13 Default 5% Error	LBLP01001449.1	91505	116241	+	99.4	19.96
NM_018268.2	55255	CHM13 Default 5% Error	LBLP01001326.1	6262023	6294593	-	100	82.36
NM_018268.2	55255	CHM13 Default 5% Error	LBLP01008423.1	8810783	8840186	+	99.68	24.34
NM_001389.3	1826	CHM13 Default 5% Error	LBLP01014826.1	26416	750622	-	99.97	58.39
NM_001389.3	1826	CHM13 Default 5% Error	LBLP01013779.1	15919	97365	+	99.89	41.63
NM_006470.3	10626	CHM13 Default 5% Error	LBLP01014722.1	5459	20307	+	99.94	62.87
NM_033547.3	92105	CHM13 Default 5% Error	LBLP01013628.1	4647	92141	-	99.02	68.22
NM_033547.3	92105	CHM13 Default 5% Error	LBLP01001866.1	6019036	6043952	-	99.9	35.15
NM_007081.2	11158	CHM13 Default 5% Error	LBLP01014331.1	7404	17884	-	99.67	85.43
NM_001003789.1	11158	CHM13 Default 5% Error	LBLP01014331.1	7404	17884	-	99.67	85.29
NM_001004325.1	440021	CHM13 Default 5% Error	LBLP01015093.1	1798124	1799211	+	100	97.31
NM_001004696.1	127074	CHM13 Default 5% Error	LBLP01013682.1	5180249	5181213	+	98.44	91.97
NM_020371.2	57099	CHM13 Default 5% Error	LBLP01000350.1	1457440	1594976	-	100	78.96
NM_015622.5	51622	CHM13 Default 5% Error	LBLP01001580.1	2403	16734	-	99.71	56.97
NM_001009905.1	146712	CHM13 Default 5% Error	LBLP01015111.1	21943	127582	+	99.84	94.64
NM_001014986.1	2346	CHM13 Default 5% Error	LBLP01013748.1	29044	88641	-	98.84	85.05
NM_182943.2	5352	CHM13 Default 5% Error	LBLP01013367.1	9726	50737	+	100	79.21
NM_182943.2	5352	CHM13 Default 5% Error	LBLP01008409.1	1025	58141	-	100	29.1
NM_000935.2	5352	CHM13 Default 5% Error	LBLP01013367.1	9726	50737	+	100	78.88
NM_000935.2	5352	CHM13 Default 5% Error	LBLP01008409.1	1025	58141	-	100	29.55
NM_197941.2	11174	CHM13 Default 5% Error	LBLP01014540.1	2997073	3214338	-	99.47	75.59
NM_197941.2	11174	CHM13 Default 5% Error	LBLP01000711.1	93312	123722	-	99.94	25.95
NM_013452.2	26609	CHM13 Default 5% Error	LBLP01014610.1	13387	15208	-	99	93.79
NM_013430.2	2678	CHM13 Default 5% Error	LBLP01008425.1	333385	373407	+	100	63.37
NM_013430.2	2678	CHM13 Default 5% Error	LBLP01014620.1	28109	33339	-	98.43	42.69
NM_144672.3	146183	CHM13 Default 5% Error	LBLP01000054.1	454	66982	-	99.53	76.29
NM_025221.5	80333	CHM13 Default 5% Error	LBLP01000380.1	279817	433846	+	98.38	91.27
NM_147181.3	80333	CHM13 Default 5% Error	LBLP01000380.1	311835	433846	+	98.12	91.19
NM_147183.3	80333	CHM13 Default 5% Error	LBLP01000380.1	311841	433846	+	98.3	94.34
NM_001035003.1	80333	CHM13 Default 5% Error	LBLP01000380.1	311829	433846	+	98.12	85.17
NM_001035003.1	80333	CHM13 Default 5% Error	LBLP01013284.1	547777	548122	-	100	14.27
NM_000651.4	1378	CHM13 Default 5% Error	LBLP01014050.1	1086351	1213414	+	99.82	86.54
NM_000552.3	7450	CHM13 Default 5% Error	LBLP01013692.1	11900	125025	-	99.86	69.03
NM_000552.3	7450	CHM13 Default 5% Error	LBLP01000197.1	5929184	5997167	-	99.54	39.85
NM_001039841.1	89839	CHM13 Default 5% Error	LBLP01014637.1	2662	11363	+	100	73.05
NM_170606.2	58508	CHM13 Default 5% Error	LBLP01000037.1	1426700	1499211	-	99.99	76.71
NM_170606.2	58508	CHM13 Default 5% Error	LBLP01001811.1	183	22670	-	99.36	9.29
NM_170606.2	58508	CHM13 Default 5% Error	LBLP01013409.1	13750	32081	+	97.02	7.15
NM_170606.2	58508	CHM13 Default 5% Error	LBLP01001821.1	16767	142823	-	100	6.33
NM_170606.2	58508	CHM13 Default 5% Error	LBLP01014386.1	7090	20578	-	97.27	2.15
NM_173812.4	283417	CHM13 Default 5% Error	LBLP01000307.1	5110	49244	+	96.02	64.67
NM_173812.4	283417	CHM13 Default 5% Error	LBLP01001052.1	47218	121815	+	99.6	43.3
NM_004607.2	6902	CHM13 Default 5% Error	LBLP01001670.1	14032132	14032325	+	93.87	28.27
NM_032558.2	84641	CHM13 Default 5% Error	LBLP01013606.1	54618	100393	+	99.55	88.38
NM_032558.2	84641	CHM13 Default 5% Error	LBLP01012947.1	24604	24980	+	100	11.38
NM_001042365.2	26095	CHM13 Default 5% Error	LBLP01001999.1	475064	477489	-	99.53	91.51
NM_001042362.2	26095	CHM13 Default 5% Error	LBLP01001999.1	475064	477489	-	99.53	83.09
NM_001042359.2	26095	CHM13 Default 5% Error	LBLP01001999.1	475064	490047	-	99.94	78.76
NM_015605.7	26095	CHM13 Default 5% Error	LBLP01001999.1	475064	477498	-	99.3	69.97
NM_001042357.3	26095	CHM13 Default 5% Error	LBLP01001999.1	475064	493156	-	99.95	76.18
NM_001042358.3	26095	CHM13 Default 5% Error	LBLP01001999.1	475064	493156	-	99.95	78.71
NM_001042361.3	26095	CHM13 Default 5% Error	LBLP01001999.1	475064	477498	-	99.3	74.77
NM_001042363.3	26095	CHM13 Default 5% Error	LBLP01001999.1	475064	493156	-	99.95	78.65
NM_001042364.3	26095	CHM13 Default 5% Error	LBLP01001999.1	475064	477498	-	99.3	77.89
NM_000540.2	6261	CHM13 Default 5% Error	LBLP01015099.1	3111	119191	+	99.52	75.33
NM_000540.2	6261	CHM13 Default 5% Error	LBLP01014429.1	721	34860	-	99.85	22.81
NM_001042723.1	6261	CHM13 Default 5% Error	LBLP01015099.1	3111	119191	+	99.52	75.31
NM_001042723.1	6261	CHM13 Default 5% Error	LBLP01014429.1	721	34860	-	99.85	22.84
NM_000372.4	7299	CHM13 Default 5% Error	LBLP01000041.1	100725	178832	+	99.09	64.68
NM_000372.4	7299	CHM13 Default 5% Error	LBLP01013760.1	16509	27498	-	99.75	38.74
NM_001043352.1	7170	CHM13 Default 5% Error	LBLP01014672.1	1252770	1269188	+	94.42	53.09
NM_001043353.1	7170	CHM13 Default 5% Error	LBLP01014672.1	1252770	1269188	+	92.96	52.94
NM_152890.5	255631	CHM13 Default 5% Error	LBLP01006459.1	2192851	2604305	+	99.85	72.69
NM_152890.5	255631	CHM13 Default 5% Error	LBLP01006462.1	5388	13672	+	99.55	27.66
NM_052997.2	91074	CHM13 Default 5% Error	LBLP01000835.1	4579295	4631187	+	99.87	55.43
NM_052997.2	91074	CHM13 Default 5% Error	LBLP01000216.1	181	56536	+	99.83	56.14
NM_145297.3	199777	CHM13 Default 5% Error	LBLP01000039.1	3357470	3372525	+	86.55	32.62
NM_005577.2	4018	CHM13 Default 5% Error	LBLP01013600.1	3392	79859	+	99.92	58.03
NM_005577.2	4018	CHM13 Default 5% Error	LBLP01013196.1	3835	37300	+	99.1	34.39
NM_005224.2	1820	CHM13 Default 5% Error	LBLP01000053.1	2076	20488	+	99.21	67.58
NM_005224.2	1820	CHM13 Default 5% Error	LBLP01000515.1	710785	717496	+	99.59	34.89
NM_002113.2	3078	CHM13 Default 5% Error	LBLP01013402.1	9340549	9344601	-	98.14	58.05
NM_001079673.1	22862	CHM13 Default 5% Error	LBLP01014431.1	7302	49839	+	100	79.6
NM_001079673.1	22862	CHM13 Default 5% Error	LBLP01013395.1	16732262	16902298	+	100	20.33
NM_022892.1	4671	CHM13 Default 5% Error	LBLP01001676.1	81627	101013	-	99.95	81.81
NM_022892.1	4671	CHM13 Default 5% Error	LBLP01000711.1	4248813	4275129	+	99.25	18.11
NM_004536.2	4671	CHM13 Default 5% Error	LBLP01001676.1	81627	101013	-	99.95	73.43
NM_004536.2	4671	CHM13 Default 5% Error	LBLP01000711.1	4248813	4275129	+	99.48	26.49
NM_198455.2	23145	CHM13 Default 5% Error	LBLP01000369.1	1	45437	-	99.81	81.05
NM_198455.2	23145	CHM13 Default 5% Error	LBLP01013651.1	95691	104699	-	99.6	11.22
NM_022065.4	63892	CHM13 Default 5% Error	LBLP01000021.1	27452866	27507756	+	99.97	55.54
NM_022065.4	63892	CHM13 Default 5% Error	LBLP01006482.1	37599854	37910368	-	99.96	46.95
NM_001083953.1	63892	CHM13 Default 5% Error	LBLP01000021.1	27452938	27507756	+	99.97	57.02
NM_001083953.1	63892	CHM13 Default 5% Error	LBLP01006482.1	37599854	37910368	-	99.96	45.38
NM_001084393.1	100037417	CHM13 Default 5% Error	LBLP01004290.1	612126	622526	+	99.16	80.73
NM_007329.2	1755	CHM13 Default 5% Error	LBLP01014518.1	2977349	3039602	-	99.94	75.17
NM_017579.2	1755	CHM13 Default 5% Error	LBLP01014518.1	2977349	3039602	-	99.79	75.66
NM_006267.4	5903	CHM13 Default 5% Error	LBLP01015085.1	1531	38414	+	99.92	89.81
NM_006267.4	5903	CHM13 Default 5% Error	LBLP01012515.1	871335	887553	+	97.02	7.75
NM_170678.2	27231	CHM13 Default 5% Error	LBLP01000050.1	2463	3057	-	100	27.67
NM_170678.2	27231	CHM13 Default 5% Error	LBLP01014171.1	3101027	3103560	-	98.12	47.06
NM_152563.2	55199	CHM13 Default 5% Error	LBLP01013966.1	22017	33495	-	99.73	94.62
NM_018172.2	55199	CHM13 Default 5% Error	LBLP01013966.1	22017	33495	-	99.75	94.88
NM_001099653.1	55199	CHM13 Default 5% Error	LBLP01013966.1	22017	33495	-	99.74	94.83
NM_020823.1	57583	CHM13 Default 5% Error	LBLP01013600.1	1982469	2012685	-	100	83.06
NM_020823.1	57583	CHM13 Default 5% Error	LBLP01013602.1	1756	70831	-	100	18.43
NM_174981.3	317754	CHM13 Default 5% Error	LBLP01014347.1	52972	83912	-	97.85	93.92
NM_182482.2	85319	CHM13 Default 5% Error	LBLP01014384.1	574	29383	-	98.51	74.66
NM_182482.2	85319	CHM13 Default 5% Error	LBLP01014396.1	3675	21907	-	92.47	19.09
NM_001100631.1	653606	CHM13 Default 5% Error	LBLP01014937.1	100597	101857	+	99.65	60.51
NM_175918.3	285464	CHM13 Default 5% Error	LBLP01001664.1	350869	354856	-	99.89	89.66
NM_017414.3	11274	CHM13 Default 5% Error	LBLP01014760.1	11408	28619	-	99.74	76.09
NM_020892.2	113878	CHM13 Default 5% Error	LBLP01014851.1	10218	21769	-	99.84	44.59
NM_001102594.1	113878	CHM13 Default 5% Error	LBLP01014851.1	10218	21769	-	99.84	46.57
NM_001102595.1	113878	CHM13 Default 5% Error	LBLP01014851.1	10218	21769	-	99.84	49.6
NM_001102596.1	113878	CHM13 Default 5% Error	LBLP01014851.1	10218	15778	-	99.91	52.54
NM_138420.2	113146	CHM13 Default 5% Error	LBLP01014351.1	80983589	81022696	-	99.68	89.19
NM_001103154.1	100506084	CHM13 Default 5% Error	LBLP01015087.1	450059	458995	+	100	75.61
NM_001103154.1	100506084	CHM13 Default 5% Error	LBLP01001343.1	19029	19149	-	100	24.79
NM_001102575.1	112574	CHM13 Default 5% Error	LBLP01000572.1	9002	10114	+	76.55	21.07
NM_021259.2	58986	CHM13 Default 5% Error	LBLP01000524.1	18	5173	-	100	20.92
NM_021259.2	58986	CHM13 Default 5% Error	LBLP01010768.1	1	741	+	99.86	20.26
NM_006382.3	374286	CHM13 Default 5% Error	LBLP01014724.1	2111	2699	+	97.62	21.28
NM_006382.3	374286	CHM13 Default 5% Error	LBLP01014723.1	27849	58069	+	99.18	79.42
NM_017653.3	54808	CHM13 Default 5% Error	LBLP01014517.1	2016676	2366554	-	100	80.89
NM_017653.3	54808	CHM13 Default 5% Error	LBLP01004260.1	30879165	30909940	+	99.41	19.4
NM_006310.3	9520	CHM13 Default 5% Error	LBLP01008421.1	3069	43656	+	99.94	82.5
NM_006310.3	9520	CHM13 Default 5% Error	LBLP01001542.1	8685	23606	-	100	12.9
NM_006852.3	11011	CHM13 Default 5% Error	LBLP01014618.1	971	80271	+	99.91	88.36
NM_006852.3	11011	CHM13 Default 5% Error	LBLP01012998.1	32871	35059	+	99.71	6.47
NM_152636.2	196074	CHM13 Default 5% Error	LBLP01014125.1	2876588	2881163	+	90.64	90.05
NM_181725.3	339175	CHM13 Default 5% Error	LBLP01012997.1	1069	24844	+	99.08	90.86
NM_001113738.1	51326	CHM13 Default 5% Error	LBLP01001491.1	4524	19914	-	97.66	92.67
NM_016632.2	51326	CHM13 Default 5% Error	LBLP01001345.1	1341	11634	-	95.55	62
NM_001303.3	1352	CHM13 Default 5% Error	LBLP01014723.1	1418371	1435060	-	99.52	70.01
NM_001303.3	1352	CHM13 Default 5% Error	LBLP01014725.1	30737	121279	-	99.66	29.8
NM_005143.3	3240	CHM13 Default 5% Error	LBLP01000854.1	910018	914750	+	100	87.63
NM_000845.2	2918	CHM13 Default 5% Error	LBLP01004288.1	23175663	23507675	-	99.85	59.31
NM_000845.2	2918	CHM13 Default 5% Error	LBLP01013625.1	1235860	1576691	+	100	41.09
NM_001127323.1	2918	CHM13 Default 5% Error	LBLP01004288.1	23175663	23507675	-	99.86	56.11
NM_001127323.1	2918	CHM13 Default 5% Error	LBLP01013625.1	1227001	1576691	+	100	44.25
NM_001129778.1	400581	CHM13 Default 5% Error	LBLP01004026.1	5149	25527	-	99.84	66.18
NM_178558.4	340252	CHM13 Default 5% Error	LBLP01000442.1	40762669	40762992	-	83.33	10.16
NM_001130022.1	340252	CHM13 Default 5% Error	LBLP01014125.1	3982215	3982616	-	85.43	17.08
NM_173678.2	285966	CHM13 Default 5% Error	LBLP01009851.1	3514	9932	+	99.43	23.83
NM_173678.2	285966	CHM13 Default 5% Error	LBLP01000372.1	10011	15412	+	99.6	76.68
NM_001130025.1	285966	CHM13 Default 5% Error	LBLP01009851.1	3017	9932	+	99.17	24.19
NM_001130025.1	285966	CHM13 Default 5% Error	LBLP01000372.1	10011	15412	+	99.6	76.32
NM_172362.2	3756	CHM13 Default 5% Error	LBLP01014050.1	4245119	4487161	-	99.84	85.19
NM_172362.2	3756	CHM13 Default 5% Error	LBLP01014051.1	13647	128876	-	99.83	14.9
NM_002238.3	3756	CHM13 Default 5% Error	LBLP01014050.1	4245119	4487160	-	99.84	86.04
NM_002238.3	3756	CHM13 Default 5% Error	LBLP01014051.1	13734	128876	-	100	13.98
NM_001130919.1	11158	CHM13 Default 5% Error	LBLP01014331.1	7404	17884	-	99.67	85.45
NM_001130920.1	11158	CHM13 Default 5% Error	LBLP01014331.1	7404	17884	-	99.67	79.65
NM_001130921.1	11158	CHM13 Default 5% Error	LBLP01014331.1	7404	17884	-	99.67	76.62
NM_001130922.1	11158	CHM13 Default 5% Error	LBLP01014331.1	7404	17884	-	99.67	85.27
NM_001130923.1	11158	CHM13 Default 5% Error	LBLP01014331.1	7404	17884	-	99.68	79.89
NM_004061.3	1010	CHM13 Default 5% Error	LBLP01001323.1	194342	307604	-	98.79	64.18
NM_004061.3	1010	CHM13 Default 5% Error	LBLP01013671.1	11301820	11944571	+	99.35	21.33
NM_004061.3	1010	CHM13 Default 5% Error	LBLP01001326.1	36870	274108	-	99.18	19.79
NM_198562.2	375341	CHM13 Default 5% Error	LBLP01013730.1	1469	4318	+	100	79.38
NM_198562.2	375341	CHM13 Default 5% Error	LBLP01000421.1	2	1503	-	93.86	25.43
NM_017952.5	55037	CHM13 Default 5% Error	LBLP01015103.1	1151	19610	+	99.73	89.32
NM_017952.5	55037	CHM13 Default 5% Error	LBLP01000002.1	19885328	19898200	+	99.18	9.09
NM_001009944.2	5310	CHM13 Default 5% Error	LBLP01013384.1	6117	47507	+	98.2	74.27
NM_000296.3	5310	CHM13 Default 5% Error	LBLP01013384.1	6117	47507	+	98.2	74.26
NM_020768.3	57528	CHM13 Default 5% Error	LBLP01001670.1	121151	148810	+	99.19	73.76
NM_020768.3	57528	CHM13 Default 5% Error	LBLP01013622.1	44523310	44594015	+	98.18	30.73
NM_001135865.1	100132247	CHM13 Default 5% Error	LBLP01001067.1	826	13272	+	99.36	82.7
NM_001135865.1	100132247	CHM13 Default 5% Error	LBLP01014625.1	9293	9692	-	97.5	10.45
NM_001136213.1	23784	CHM13 Default 5% Error	LBLP01013566.1	554366	585891	+	99.68	94.59
NM_001137671.1	388468	CHM13 Default 5% Error	LBLP01014347.1	52965	84315	-	97.33	94.69
NM_130785.3	93492	CHM13 Default 5% Error	LBLP01014419.1	5750	49028	+	94.66	64.49
NM_130785.3	93492	CHM13 Default 5% Error	LBLP01014421.1	5444141	5506969	+	98.98	28.34
NM_199254.2	93492	CHM13 Default 5% Error	LBLP01014419.1	3723	49028	+	95.53	68.16
NM_199254.2	93492	CHM13 Default 5% Error	LBLP01014421.1	5444141	5506968	+	99.17	30.59
NM_001141968.1	93492	CHM13 Default 5% Error	LBLP01014419.1	5504	49028	+	95.09	66.79
NM_001141968.1	93492	CHM13 Default 5% Error	LBLP01014421.1	5444141	5528522	+	96.92	37.27
NM_146421.2	2944	CHM13 Default 5% Error	LBLP01004214.1	426796	462644	-	96.31	95.9
NM_001099676.2	115749	CHM13 Default 5% Error	LBLP01014110.1	7777173	7881598	+	100	46.16
NM_001099676.2	115749	CHM13 Default 5% Error	LBLP01014115.1	788	18569	+	100	53.42
NM_015092.4	23049	CHM13 Default 5% Error	LBLP01015076.1	1534060	1602991	-	99.89	89.64
NM_015092.4	23049	CHM13 Default 5% Error	LBLP01001610.1	926	18076	-	97.61	8.85
NM_015092.4	23049	CHM13 Default 5% Error	LBLP01014612.1	26476	26933	-	99.34	2.83
NM_001143837.1	50507	CHM13 Default 5% Error	LBLP01013755.1	14758	45488	+	99.24	65.33
NM_001143837.1	50507	CHM13 Default 5% Error	LBLP01000040.1	657	190324	+	99.74	33.32
NM_005708.3	10082	CHM13 Default 5% Error	LBLP01000393.1	9965951	9991422	-	99.96	74.92
NM_005708.3	10082	CHM13 Default 5% Error	LBLP01000396.1	64740	1143866	-	99.44	25.26
NM_003156.3	6786	CHM13 Default 5% Error	LBLP01001299.1	143766	213096	-	99.96	79.29
NM_003156.3	6786	CHM13 Default 5% Error	LBLP01008416.1	43434	44140	-	100	17.4
NM_001293.2	1207	CHM13 Default 5% Error	LBLP01013631.1	1916195	1934364	-	89.98	52.68
NM_001145029.1	374860	CHM13 Default 5% Error	LBLP01013258.1	34132	100605	+	99.95	53.36
NM_001145029.1	374860	CHM13 Default 5% Error	LBLP01003013.1	106028	179901	+	97.85	56.2
NM_001142800.1	346007	CHM13 Default 5% Error	LBLP01000034.1	17583	1600971	+	99.96	78.26
NM_001142800.1	346007	CHM13 Default 5% Error	LBLP01000011.1	20301973	20671935	+	100	21.75
NM_001143831.2	2915	CHM13 Default 5% Error	LBLP01013628.1	10588172	10933852	-	99.94	89.12
NM_001143831.2	2915	CHM13 Default 5% Error	LBLP01013763.1	59205	80675	+	96.15	12.22
NM_001160116.1	123207	CHM13 Default 5% Error	LBLP01013667.1	770488	797300	-	97.68	29.52
NM_001160116.1	123207	CHM13 Default 5% Error	LBLP01014515.1	193029	193414	+	86.82	62.35
NM_170664.2	146183	CHM13 Default 5% Error	LBLP01000054.1	454	40521	-	99.3	68.39
NM_001161683.1	146183	CHM13 Default 5% Error	LBLP01000054.1	454	61064	-	99.5	75.31
NM_175722.3	7173	CHM13 Default 5% Error	LBLP01000063.1	4786	109620	-	99.38	83.64
NM_175722.3	7173	CHM13 Default 5% Error	LBLP01004263.1	4110106	4112240	-	100	17.26
NM_175721.3	7173	CHM13 Default 5% Error	LBLP01000063.1	4786	109620	-	99.48	85.8
NM_175721.3	7173	CHM13 Default 5% Error	LBLP01004263.1	4110106	4112240	-	100	14.97
NM_175719.3	7173	CHM13 Default 5% Error	LBLP01000063.1	4786	110567	-	99.45	86.04
NM_175719.3	7173	CHM13 Default 5% Error	LBLP01004263.1	4110106	4112240	-	100	14.72
NM_000547.5	7173	CHM13 Default 5% Error	LBLP01000063.1	4786	110567	-	99.48	86.8
NM_000547.5	7173	CHM13 Default 5% Error	LBLP01004263.1	4110106	4112240	-	100	13.92
NM_033200.2	91289	CHM13 Default 5% Error	LBLP01013691.1	8700124	8703134	-	99.88	65.4
NM_001164315.1	375248	CHM13 Default 5% Error	LBLP01014415.1	1977	78610	-	99.08	50.48
NM_001164315.1	375248	CHM13 Default 5% Error	LBLP01014381.1	1578	38847	+	93.05	37.98
NM_001164315.1	375248	CHM13 Default 5% Error	LBLP01001247.1	52748	66462	+	96.99	17.38
NM_025190.3	57730	CHM13 Default 5% Error	LBLP01014407.1	23956	57235	-	99.88	60.42
NM_025190.3	57730	CHM13 Default 5% Error	LBLP01001248.1	1541	38540	+	97.23	25.89
NM_025190.3	57730	CHM13 Default 5% Error	LBLP01000392.1	1800	44984	-	97.25	18.81
NM_001164458.1	653857	CHM13 Default 5% Error	LBLP01013644.1	396830	438839	+	99.76	64.86
NM_001164458.1	653857	CHM13 Default 5% Error	LBLP01013645.1	16966	27681	+	99.59	38.64
NM_001164459.1	653857	CHM13 Default 5% Error	LBLP01013644.1	417513	438839	+	99.61	63.1
NM_001164459.1	653857	CHM13 Default 5% Error	LBLP01013645.1	16966	27681	+	99.59	40.6
NM_002338.3	4045	CHM13 Default 5% Error	LBLP01013341.1	22038240	22343404	-	99.7	93.15
NM_002338.3	4045	CHM13 Default 5% Error	LBLP01004280.1	91935	97754	-	98.32	7.52
NM_001164507.1	4703	CHM13 Default 5% Error	LBLP01013534.1	22560003	22698376	+	99.93	54.99
NM_001164507.1	4703	CHM13 Default 5% Error	LBLP01013536.1	593	107398	+	99.92	43.04
NM_001164508.1	4703	CHM13 Default 5% Error	LBLP01013534.1	22560003	22698376	+	99.93	54.99
NM_001164508.1	4703	CHM13 Default 5% Error	LBLP01013536.1	593	107398	+	99.92	43.04
NM_004543.4	4703	CHM13 Default 5% Error	LBLP01013534.1	22560003	22684672	+	99.97	57.18
NM_004543.4	4703	CHM13 Default 5% Error	LBLP01013536.1	16349	107398	+	99.95	42.79
NM_147127.4	132884	CHM13 Default 5% Error	LBLP01013304.1	2890	129073	-	99.49	71.1
NM_147127.4	132884	CHM13 Default 5% Error	LBLP01013417.1	119714	150723	-	99.23	35.78
NM_001166136.1	132884	CHM13 Default 5% Error	LBLP01013304.1	2890	130054	-	99.52	73.7
NM_001166136.1	132884	CHM13 Default 5% Error	LBLP01013417.1	119714	147717	-	99.23	32.3
NM_006569.5	10669	CHM13 Default 5% Error	LBLP01006482.1	21505293	21523817	-	99.78	97.35
NM_001166239.1	10669	CHM13 Default 5% Error	LBLP01006482.1	21505293	21523595	-	99.76	97.13
NM_001077653.2	57057	CHM13 Default 5% Error	LBLP01008431.1	683828	706441	+	99.7	75.54
NM_001077653.2	57057	CHM13 Default 5% Error	LBLP01001052.1	1777	31001	+	99.62	29.11
NM_021023.5	10878	CHM13 Default 5% Error	LBLP01013402.1	9253738	9284642	-	95.41	92.56
NM_001166624.1	10878	CHM13 Default 5% Error	LBLP01013402.1	9253738	9284642	-	94.94	91.62
NM_001170633.1	115749	CHM13 Default 5% Error	LBLP01014110.1	7777173	7881598	+	99.91	59.01
NM_001170633.1	115749	CHM13 Default 5% Error	LBLP01014115.1	788	18569	+	100	41.03
NM_001170714.1	9564	CHM13 Default 5% Error	LBLP01008562.1	50167	50800	+	96.84	17.88
NM_001170715.1	9564	CHM13 Default 5% Error	LBLP01008562.1	50136	50800	+	94.36	20.25
NM_001170716.1	9564	CHM13 Default 5% Error	LBLP01008562.1	50169	50800	+	96.99	19.71
NM_001170717.1	9564	CHM13 Default 5% Error	LBLP01008562.1	50016	50800	+	96.94	23.64
NM_001170718.1	9564	CHM13 Default 5% Error	LBLP01008562.1	50035	50800	+	89.31	22.54
NM_014567.3	9564	CHM13 Default 5% Error	LBLP01008562.1	50016	50800	+	96.94	24.04
NM_001170719.1	9564	CHM13 Default 5% Error	LBLP01008562.1	50169	50800	+	96.99	18.68
NM_147195.2	253650	CHM13 Default 5% Error	LBLP01013033.1	16528	52733	-	96.78	78.17
NM_147195.2	253650	CHM13 Default 5% Error	LBLP01013035.1	6259	23458	-	100	25.02
NM_017677.3	55613	CHM13 Default 5% Error	LBLP01004271.1	7357896	7449626	+	99.26	60.71
NM_017677.3	55613	CHM13 Default 5% Error	LBLP01013277.1	1095312	1098304	-	100	40.96
NM_130464.2	23117	CHM13 Default 5% Error	LBLP01013389.1	5401	27963	+	98.85	93.24
NM_001178055.1	79668	CHM13 Default 5% Error	LBLP01013679.1	77560	173966	+	99.92	95.47
NM_001178055.1	79668	CHM13 Default 5% Error	LBLP01014497.1	176057	178286	+	100	4.55
NM_024615.3	79668	CHM13 Default 5% Error	LBLP01013679.1	77560	173966	+	99.92	95.79
NM_024615.3	79668	CHM13 Default 5% Error	LBLP01014497.1	177099	178286	+	100	4.23
NM_001178056.1	79668	CHM13 Default 5% Error	LBLP01013679.1	77560	173966	+	99.92	95.71
NM_172213.3	926	CHM13 Default 5% Error	LBLP01013590.1	40703	57708	+	99.7	63.49
NM_172101.3	926	CHM13 Default 5% Error	LBLP01013590.1	40703	57707	+	99.7	60.35
NM_172102.3	926	CHM13 Default 5% Error	LBLP01013590.1	40703	57708	+	100	60.14
NM_001178100.1	926	CHM13 Default 5% Error	LBLP01013590.1	40703	49632	+	100	58.58
NM_018196.3	55217	CHM13 Default 5% Error	LBLP01015089.1	1	107494	-	99.91	30.67
NM_018196.3	55217	CHM13 Default 5% Error	LBLP01014611.1	775199	778699	+	99.53	70.81
NM_001079877.2	10156	CHM13 Default 5% Error	LBLP01000344.1	22	14888	+	99.3	78.89
NM_006989.5	10156	CHM13 Default 5% Error	LBLP01000344.1	22	14888	+	99.32	79.41
NM_001100874.2	150159	CHM13 Default 5% Error	LBLP01014056.1	15407508	15519241	+	99.11	83.98
NM_003429.4	7639	CHM13 Default 5% Error	LBLP01000442.1	40762666	40783634	-	82.83	14.62
NM_138618.3	6006	CHM13 Default 5% Error	LBLP01013331.1	3762	35659	-	99.41	69.13
NM_138618.3	6006	CHM13 Default 5% Error	LBLP01013329.1	11310	24492	+	100	30.99
NM_138616.3	6006	CHM13 Default 5% Error	LBLP01013331.1	512	35659	-	98.31	60.68
NM_138616.3	6006	CHM13 Default 5% Error	LBLP01013329.1	919	24492	+	99.66	50.72
NM_020485.4	6006	CHM13 Default 5% Error	LBLP01013331.1	512	35659	-	98.97	71.69
NM_020485.4	6006	CHM13 Default 5% Error	LBLP01013329.1	918	24492	+	99.66	36.58
NM_138617.3	6006	CHM13 Default 5% Error	LBLP01013331.1	511	35659	-	98.59	69.17
NM_138617.3	6006	CHM13 Default 5% Error	LBLP01013329.1	918	24492	+	99.61	41.86
NM_001193484.1	3987	CHM13 Default 5% Error	LBLP01000921.1	65418	93064	-	99.9	95.18
NM_198097.3	221960	CHM13 Default 5% Error	LBLP01001580.1	2403	16742	-	99.81	56.79
NM_024583.4	79634	CHM13 Default 5% Error	LBLP01013400.1	11711	18388	+	99.18	71.73
NM_001193528.1	79634	CHM13 Default 5% Error	LBLP01013400.1	11711	18388	+	99.18	73.93
NM_001001888.3	425054	CHM13 Default 5% Error	LBLP01015075.1	9643	11233	+	99.17	92.34
NM_022359.5	9659	CHM13 Default 5% Error	LBLP01014034.1	14474	15403	+	99.46	43.76
NM_022359.5	9659	CHM13 Default 5% Error	LBLP01006472.1	45084	45638	+	99.64	32.43
NM_001195260.1	9659	CHM13 Default 5% Error	LBLP01014034.1	5724	15403	+	98.97	81.81
NM_001195261.1	9659	CHM13 Default 5% Error	LBLP01014034.1	14474	15403	+	99.46	70.23
NM_001002810.3	9659	CHM13 Default 5% Error	LBLP01014034.1	14474	15403	+	99.46	58.8
NM_001195563.1	23261	CHM13 Default 5% Error	LBLP01014110.1	7803590	7804078	-	81.73	65.67
NM_001195811.1	200150	CHM13 Default 5% Error	LBLP01013359.1	2553	179606	+	100	85.68
NM_001195811.1	200150	CHM13 Default 5% Error	LBLP01014032.1	3285	107837	-	99.27	9.14
NM_152666.2	200150	CHM13 Default 5% Error	LBLP01013359.1	2553	179606	+	100	78.24
NM_152666.2	200150	CHM13 Default 5% Error	LBLP01014032.1	3285	183035	-	99.64	17.03
NM_001198542.1	54768	CHM13 Default 5% Error	LBLP01013721.1	36027	174291	-	99.56	80.32
NM_001198543.1	54768	CHM13 Default 5% Error	LBLP01013721.1	36027	174291	-	99.56	81.1
NM_001004065.4	11217	CHM13 Default 5% Error	LBLP01014490.1	1624957	1661346	+	99.92	96.29
NM_001198656.1	11217	CHM13 Default 5% Error	LBLP01014490.1	1624957	1661346	+	99.92	96.31
NM_033514.4	96626	CHM13 Default 5% Error	LBLP01001661.1	394	974	+	99.65	47.61
NM_001199011.1	84516	CHM13 Default 5% Error	LBLP01013402.1	37715344	37715540	-	92.38	28.18
NM_001199417.1	57636	CHM13 Default 5% Error	LBLP01001064.1	1597	59241	-	99.63	50.61
NM_001199417.1	57636	CHM13 Default 5% Error	LBLP01015177.1	658	22948	+	99.93	49.27
NM_001200001.1	4853	CHM13 Default 5% Error	LBLP01014513.1	2580870	2643100	-	99.94	83.57
NM_001200001.1	4853	CHM13 Default 5% Error	LBLP01006501.1	19746	20129	+	96.9	8.87
NM_024408.3	4853	CHM13 Default 5% Error	LBLP01014513.1	2557310	2643100	-	99.98	93.82
NM_024408.3	4853	CHM13 Default 5% Error	LBLP01006501.1	19746	20129	+	96.9	3.34
NM_016434.3	51750	CHM13 Default 5% Error	LBLP01000058.1	2637	38102	-	99.07	77.8
NM_016434.3	51750	CHM13 Default 5% Error	LBLP01000530.1	605177	607061	-	99.73	22.98
NM_032957.4	51750	CHM13 Default 5% Error	LBLP01000058.1	2637	38102	-	99.08	78.12
NM_032957.4	51750	CHM13 Default 5% Error	LBLP01000530.1	605177	607061	-	99.73	22.65
NM_001204199.1	6728	CHM13 Default 5% Error	LBLP01014740.1	20357354	20405530	-	94.99	70.76
NM_001205288.1	100288695	CHM13 Default 5% Error	LBLP01000921.1	89865	93105	-	95.29	63.65
NM_001206744.1	7173	CHM13 Default 5% Error	LBLP01000063.1	4786	110567	-	99.48	86.67
NM_001206744.1	7173	CHM13 Default 5% Error	LBLP01004263.1	4110106	4112240	-	100	13.94
NM_001206745.1	7173	CHM13 Default 5% Error	LBLP01000063.1	4786	110567	-	99.45	85.9
NM_001206745.1	7173	CHM13 Default 5% Error	LBLP01004263.1	4110106	4112240	-	100	14.74
NM_152770.2	255119	CHM13 Default 5% Error	LBLP01013978.1	181185	274945	+	99.8	57.31
NM_152770.2	255119	CHM13 Default 5% Error	LBLP01004264.1	10738782	11017339	+	97.89	47.17
NM_001206997.1	255119	CHM13 Default 5% Error	LBLP01013978.1	181185	274945	+	99.8	54.22
NM_001206997.1	255119	CHM13 Default 5% Error	LBLP01004264.1	10738782	11037286	+	98.06	48.63
NM_001105677.2	574537	CHM13 Default 5% Error	LBLP01001672.1	6106	17083	+	100	71.1
NM_001193485.2	3987	CHM13 Default 5% Error	LBLP01000921.1	65418	93105	-	99.36	91.33
NM_001242672.1	100287898	CHM13 Default 5% Error	LBLP01001443.1	9760	13960	+	99.9	57.4
NM_001242672.1	100287898	CHM13 Default 5% Error	LBLP01012516.1	10128085	10134162	+	100	42.92
NM_001244752.1	441459	CHM13 Default 5% Error	LBLP01013604.1	8576586	8632188	+	93.92	91.44
NM_001009909.3	338645	CHM13 Default 5% Error	LBLP01000036.1	24003101	24120772	-	99.39	86.95
NM_001252008.1	338645	CHM13 Default 5% Error	LBLP01000036.1	24003101	24113622	-	99.54	86.34
NM_001252010.1	338645	CHM13 Default 5% Error	LBLP01000036.1	24003101	24120772	-	99.73	87.91
NM_022662.3	64682	CHM13 Default 5% Error	LBLP01003023.1	227949	287647	-	99.38	61.19
NM_022662.3	64682	CHM13 Default 5% Error	LBLP01015074.1	475793	509233	+	99.94	24.49
NM_022662.3	64682	CHM13 Default 5% Error	LBLP01003022.1	2257	15354	-	98.29	9.06
NM_022662.3	64682	CHM13 Default 5% Error	LBLP01012699.1	34352	46512	-	97.17	7.76
NM_001256171.1	7639	CHM13 Default 5% Error	LBLP01014125.1	3962681	3982613	-	85.27	17.98
NM_001256172.1	7639	CHM13 Default 5% Error	LBLP01014125.1	3982229	3982613	-	85.82	23.67
NM_001042512.2	143162	CHM13 Default 5% Error	LBLP01002237.1	1913207	1925002	+	99.53	56.81
NM_004892.5	9554	CHM13 Default 5% Error	LBLP01006497.1	8223	15684	+	99.1	82.59
NM_001257362.1	100288966	CHM13 Default 5% Error	LBLP01003007.1	1865	14576	-	99.66	64.51
NM_021988.5	7335	CHM13 Default 5% Error	LBLP01014832.1	1485816	1487630	-	94.11	71.31
NM_199144.2	7335	CHM13 Default 5% Error	LBLP01014832.1	1485816	1487630	-	94.11	73.53
NM_001257393.1	7335	CHM13 Default 5% Error	LBLP01014832.1	1485816	1487630	-	94.11	77.66
NM_213651.2	29957	CHM13 Default 5% Error	LBLP01013919.1	4371108	4422342	-	100	91.07
NM_001040135.2	57180	CHM13 Default 5% Error	LBLP01015109.1	869387	870310	-	100	46.03
NM_001040135.2	57180	CHM13 Default 5% Error	LBLP01013644.1	425142	435747	+	98.71	30.84
NM_001040135.2	57180	CHM13 Default 5% Error	LBLP01013651.1	19902	38423	+	99.65	14.5
NM_020445.5	57180	CHM13 Default 5% Error	LBLP01015109.1	869387	872645	-	99.73	51.28
NM_020445.5	57180	CHM13 Default 5% Error	LBLP01013644.1	425142	435747	+	98.71	27.93
NM_020445.5	57180	CHM13 Default 5% Error	LBLP01013651.1	19902	49618	+	97.94	15.15
NM_001312.3	1397	CHM13 Default 5% Error	LBLP01012520.1	680855	682028	-	99.87	63.96
NM_001270837.1	1397	CHM13 Default 5% Error	LBLP01012520.1	680855	682028	-	99.87	47.01
NM_001270837.1	1397	CHM13 Default 5% Error	LBLP01014351.1	81514890	81522549	+	97.3	38.49
NM_001270841.1	1397	CHM13 Default 5% Error	LBLP01012520.1	680855	681901	-	100	84.92
NM_017558.4	54768	CHM13 Default 5% Error	LBLP01013721.1	31709	174291	-	99.53	81.49
NM_001270974.1	54768	CHM13 Default 5% Error	LBLP01013721.1	24452	174291	-	99.68	17.94
NM_001270974.1	54768	CHM13 Default 5% Error	LBLP01013716.1	6333	160708	-	99.75	64.19
NM_001270974.1	54768	CHM13 Default 5% Error	LBLP01001102.1	594388	605576	-	100	7.2
NM_001271015.1	55284	CHM13 Default 5% Error	LBLP01013911.1	8081836	8082160	+	94.76	34.17
NM_001271208.1	4703	CHM13 Default 5% Error	LBLP01013534.1	22560003	22698376	+	99.93	54.77
NM_001271208.1	4703	CHM13 Default 5% Error	LBLP01013536.1	593	107398	+	99.92	43.27
NM_001271534.1	1826	CHM13 Default 5% Error	LBLP01014826.1	26416	750622	-	99.97	58.85
NM_001271534.1	1826	CHM13 Default 5% Error	LBLP01013779.1	15919	97365	+	99.89	41.19
NM_001271561.1	5621	CHM13 Default 5% Error	LBLP01014832.1	2819792	2835205	+	99.08	99.12
NM_001271872.1	653464	CHM13 Default 5% Error	LBLP01014047.1	8008	23269	+	99.46	67.17
NM_001271872.1	653464	CHM13 Default 5% Error	LBLP01014045.1	50572	123694	+	98.28	24.23
NM_018264.3	55253	CHM13 Default 5% Error	LBLP01004508.1	1264026	1369102	+	98.2	46.31
NM_018264.3	55253	CHM13 Default 5% Error	LBLP01002280.1	14347	15561	-	100	36.11
NM_018264.3	55253	CHM13 Default 5% Error	LBLP01004513.1	9989	44306	+	98.15	12.75
NM_018264.3	55253	CHM13 Default 5% Error	LBLP01004510.1	13185	36352	+	97.47	9.36
NM_001009931.2	388697	CHM13 Default 5% Error	LBLP01013632.1	1	16940	-	95.85	66.1
NM_001037501.2	728841	CHM13 Default 5% Error	LBLP01014035.1	13055	47093	-	98.15	92.45
NM_001037501.2	728841	CHM13 Default 5% Error	LBLP01014039.1	1059	1411	-	98.02	7.61
NM_001037675.3	400818	CHM13 Default 5% Error	LBLP01014035.1	13055	47093	-	98.01	94.43
NM_001277444.1	400818	CHM13 Default 5% Error	LBLP01014035.1	13055	47093	-	98.11	94.99
NM_001039703.5	100132406	CHM13 Default 5% Error	LBLP01013023.1	73	31926	-	98.49	45.2
NM_001039703.5	100132406	CHM13 Default 5% Error	LBLP01014772.1	2605	22703	+	96.53	21.65
NM_001039703.5	100132406	CHM13 Default 5% Error	LBLP01014528.1	581	6221	-	95.09	9.45
NM_017940.4	55672	CHM13 Default 5% Error	LBLP01004282.1	1010	21591	+	98.47	63.38
NM_017940.4	55672	CHM13 Default 5% Error	LBLP01014769.1	5299	33448	+	98.28	32.94
NM_001277961.1	6786	CHM13 Default 5% Error	LBLP01001299.1	143766	213096	-	99.97	80.8
NM_001277961.1	6786	CHM13 Default 5% Error	LBLP01008416.1	43434	44140	-	100	16.14
NM_001277962.1	6786	CHM13 Default 5% Error	LBLP01001299.1	143766	213096	-	99.96	79.48
NM_001277962.1	6786	CHM13 Default 5% Error	LBLP01008416.1	43434	44140	-	100	17.24
NM_001278189.1	7170	CHM13 Default 5% Error	LBLP01014672.1	1252770	1269188	+	94.42	73.23
NM_001278267.1	100288142	CHM13 Default 5% Error	LBLP01014776.1	1116	34250	+	97.25	24.85
NM_001278267.1	100288142	CHM13 Default 5% Error	LBLP01014035.1	13055	42794	-	96.07	24.93
NM_001278267.1	100288142	CHM13 Default 5% Error	LBLP01014783.1	490	24926	+	95.24	17.64
NM_001278267.1	100288142	CHM13 Default 5% Error	LBLP01014780.1	782	22198	+	95.45	16.66
NM_001278267.1	100288142	CHM13 Default 5% Error	LBLP01014789.1	121	16214	+	93.23	14.67
NM_001278267.1	100288142	CHM13 Default 5% Error	LBLP01014786.1	1234	15732	+	92.29	10.21
NM_001278267.1	100288142	CHM13 Default 5% Error	LBLP01013025.1	637	13396	-	96.85	9.31
NM_001278267.1	100288142	CHM13 Default 5% Error	LBLP01014527.1	1	9355	-	95.02	8.22
NM_015383.2	25832	CHM13 Default 5% Error	LBLP01013023.1	73	31926	-	98.73	50.59
NM_015383.2	25832	CHM13 Default 5% Error	LBLP01014035.1	13055	47093	-	96.18	44.24
NM_014923.4	22862	CHM13 Default 5% Error	LBLP01014431.1	7302	49839	+	100	84.67
NM_014923.4	22862	CHM13 Default 5% Error	LBLP01013395.1	16866655	16902298	+	100	15.28
NM_001278438.1	22862	CHM13 Default 5% Error	LBLP01014431.1	7302	49839	+	100	79.06
NM_001278438.1	22862	CHM13 Default 5% Error	LBLP01013395.1	16732959	16902298	+	100	20.87
NM_005560.4	3911	CHM13 Default 5% Error	LBLP01000058.1	1346698	1396362	+	99.65	63.95
NM_005560.4	3911	CHM13 Default 5% Error	LBLP01014885.1	21739059	21747826	-	99.95	36.09
NM_018078.3	55132	CHM13 Default 5% Error	LBLP01001038.1	923906	925078	-	75.62	28.07
NM_178043.2	55132	CHM13 Default 5% Error	LBLP01001038.1	923906	925078	-	75.62	59.36
NM_001198832.2	9659	CHM13 Default 5% Error	LBLP01014034.1	11240	116092	+	99.56	90.47
NM_001002812.2	9659	CHM13 Default 5% Error	LBLP01014034.1	14474	76606	+	99.9	89.26
NM_032999.3	2969	CHM13 Default 5% Error	LBLP01013608.1	127562	159470	-	99.81	70.57
NM_033000.3	2969	CHM13 Default 5% Error	LBLP01013608.1	127562	159470	-	99.81	71.51
NM_033001.3	2969	CHM13 Default 5% Error	LBLP01013608.1	127562	159465	-	99.87	71.45
NM_001518.4	2969	CHM13 Default 5% Error	LBLP01013608.1	127562	159465	-	99.87	72.41
NM_001163636.2	2969	CHM13 Default 5% Error	LBLP01013608.1	127562	159465	-	99.87	71.5
NM_024318.3	79168	CHM13 Default 5% Error	LBLP01015116.1	1506486	1509319	+	97.57	90.6
NM_001282506.1	200958	CHM13 Default 5% Error	LBLP01014678.1	65723	77860	+	99.47	80.2
NM_001282524.1	728741	CHM13 Default 5% Error	LBLP01001244.1	20991	31573	-	98.4	88.9
NM_016124.4	6007	CHM13 Default 5% Error	LBLP01013329.1	56302	86474	-	98.34	80.86
NM_001127691.2	6007	CHM13 Default 5% Error	LBLP01013329.1	56302	86474	-	98.85	78.69
NM_001282868.1	6007	CHM13 Default 5% Error	LBLP01013329.1	56302	86474	-	98.89	79.34
NM_001282869.1	6007	CHM13 Default 5% Error	LBLP01013329.1	56302	86474	-	98.22	79.76
NM_001282870.1	6007	CHM13 Default 5% Error	LBLP01013329.1	56302	86474	-	98.29	80.34
NM_001282871.1	6007	CHM13 Default 5% Error	LBLP01013329.1	56302	86474	-	98.18	80.96
NM_001282872.1	6007	CHM13 Default 5% Error	LBLP01013329.1	56302	86474	-	98.24	81.48
NM_001282855.1	154865	CHM13 Default 5% Error	LBLP01014672.1	28917142	28917715	-	99.12	16.33
NM_001283009.1	51750	CHM13 Default 5% Error	LBLP01000058.1	2637	38102	-	99.07	75.23
NM_001283009.1	51750	CHM13 Default 5% Error	LBLP01000530.1	605177	607061	-	99.77	25.54
NM_001283010.1	51750	CHM13 Default 5% Error	LBLP01000058.1	2637	38102	-	99.02	76.48
NM_001283010.1	51750	CHM13 Default 5% Error	LBLP01000530.1	605177	607061	-	99.73	24.35
NM_001284333.1	11011	CHM13 Default 5% Error	LBLP01014618.1	971	80271	+	99.91	88.55
NM_001284333.1	11011	CHM13 Default 5% Error	LBLP01012998.1	32871	35059	+	99.71	6.34
NM_007270.4	11328	CHM13 Default 5% Error	LBLP01014750.1	1190922	1204335	-	99.86	65.37
NM_007270.4	11328	CHM13 Default 5% Error	LBLP01014753.1	4884	10904	-	99.12	19.59
NM_001284341.1	11328	CHM13 Default 5% Error	LBLP01014750.1	1190922	1204335	-	99.86	62.5
NM_001284341.1	11328	CHM13 Default 5% Error	LBLP01014753.1	4884	22066	-	99.04	23.02
NM_001284343.1	11328	CHM13 Default 5% Error	LBLP01014750.1	1190922	1203309	-	99.86	83.88
NM_001284343.1	11328	CHM13 Default 5% Error	LBLP01014753.1	4884	5966	-	98.01	11.15
NM_001285444.1	23042	CHM13 Default 5% Error	LBLP01000527.1	2510	18138	+	100	72.82
NM_001285448.1	23042	CHM13 Default 5% Error	LBLP01000527.1	2510	18138	+	100	74.35
NM_001285447.1	23042	CHM13 Default 5% Error	LBLP01000527.1	2510	18138	+	100	74.56
NM_001285445.1	23042	CHM13 Default 5% Error	LBLP01000527.1	2510	18138	+	100	72.87
NM_001285450.1	23042	CHM13 Default 5% Error	LBLP01000527.1	2510	9612	+	99.8	45.39
NM_001285449.1	23042	CHM13 Default 5% Error	LBLP01000527.1	2510	32664	+	91.55	24.43
NM_015027.3	23042	CHM13 Default 5% Error	LBLP01000527.1	2510	18138	+	100	71.56
NM_001284363.1	11011	CHM13 Default 5% Error	LBLP01014618.1	970	80271	+	99.91	94.31
NM_002457.3	4583	CHM13 Default 5% Error	LBLP01015093.1	2295460	2313890	-	93.95	68.05
NM_002457.3	4583	CHM13 Default 5% Error	LBLP01001732.1	999	15776	-	99.32	23.49
NM_206962.3	3275	CHM13 Default 5% Error	LBLP01002289.1	29410	31153	-	99.6	41.18
NM_001535.4	3275	CHM13 Default 5% Error	LBLP01002289.1	29410	31153	-	99.6	43.11
NM_001242864.2	3275	CHM13 Default 5% Error	LBLP01002289.1	29410	31153	-	99.6	49.65
NM_001286677.1	3275	CHM13 Default 5% Error	LBLP01002289.1	29410	30245	-	99.16	44.35
NM_001286676.1	3275	CHM13 Default 5% Error	LBLP01002289.1	29410	31156	-	99.5	53.42
NM_001286678.1	3275	CHM13 Default 5% Error	LBLP01002289.1	29410	30242	-	99.39	48.74
NM_017820.4	54932	CHM13 Default 5% Error	LBLP01014493.1	25366	102796	-	99.77	76.01
NM_017820.4	54932	CHM13 Default 5% Error	LBLP01014492.1	24277214	24294848	-	100	22.02
NM_001287250.1	100507607	CHM13 Default 5% Error	LBLP01001327.1	9104	19619	+	99.43	88.46
NM_001026383.2	79741	CHM13 Default 5% Error	LBLP01000835.1	2857	24413	+	96.92	27.95
NM_001026383.2	79741	CHM13 Default 5% Error	LBLP01006484.1	16726	114923	-	99.73	76.54
NM_145023.5	79741	CHM13 Default 5% Error	LBLP01000835.1	2857	24413	+	97.03	24.37
NM_145023.5	79741	CHM13 Default 5% Error	LBLP01006484.1	16726	114923	-	99.77	79.03
NM_001037984.2	124565	CHM13 Default 5% Error	LBLP01015111.1	1739415	1782563	+	100	52.15
NM_001037984.2	124565	CHM13 Default 5% Error	LBLP01000890.1	3225	5473	+	99.75	45.05
NM_001288813.1	51326	CHM13 Default 5% Error	LBLP01001345.1	11732	13505	-	100	81.75
NM_001288812.1	51326	CHM13 Default 5% Error	LBLP01001340.1	3304	3545	+	93.87	32.26
NM_001288811.1	51326	CHM13 Default 5% Error	LBLP01001345.1	11732	23085	-	99.89	82.68
NM_001288833.1	2678	CHM13 Default 5% Error	LBLP01008425.1	352791	373407	+	100	67.61
NM_001288833.1	2678	CHM13 Default 5% Error	LBLP01014620.1	28109	33339	-	98.43	37.71
NM_013421.2	2678	CHM13 Default 5% Error	LBLP01008425.1	352791	373407	+	100	66.73
NM_013421.2	2678	CHM13 Default 5% Error	LBLP01014620.1	28109	33339	-	98.43	38.76
NM_001289117.1	27231	CHM13 Default 5% Error	LBLP01000050.1	2463	3057	-	100	27.31
NM_001289117.1	27231	CHM13 Default 5% Error	LBLP01014171.1	3101027	3103546	-	99.61	45.22
NM_001014812.2	84191	CHM13 Default 5% Error	LBLP01014565.1	127201	144330	-	88.67	83.58
NM_176820.3	338321	CHM13 Default 5% Error	LBLP01015086.1	312	23715	-	99.96	72.64
NM_176820.3	338321	CHM13 Default 5% Error	LBLP01015116.1	269	4428	+	100	27.43
NM_001289931.1	255403	CHM13 Default 5% Error	LBLP01001664.1	1587547	1590797	-	99.93	90.45
NM_001039127.5	255403	CHM13 Default 5% Error	LBLP01001664.1	1587547	1621136	-	99.74	94.84
NM_001289930.1	255403	CHM13 Default 5% Error	LBLP01001664.1	1587547	1621136	-	99.78	95.66
NM_001289953.1	388561	CHM13 Default 5% Error	LBLP01001326.1	3727018	3777167	+	86.57	78.72
NM_207355.3	102724631	CHM13 Default 5% Error	LBLP01014347.1	52972	84231	-	99.75	95.22
NM_001290118.1	100652748	CHM13 Default 5% Error	LBLP01001551.1	1907	3749	+	99.89	77.64
NM_001290117.1	100652748	CHM13 Default 5% Error	LBLP01001551.1	1907	3749	+	99.89	73.2
NM_001290117.1	100652748	CHM13 Default 5% Error	LBLP01001548.1	2919	9270	+	100	13.85
NM_001101663.4	200030	CHM13 Default 5% Error	LBLP01014035.1	13055	47093	-	98.87	89.5
NM_001101663.4	200030	CHM13 Default 5% Error	LBLP01014039.1	1036	10038	-	97.19	10.92
NM_183372.5	200030	CHM13 Default 5% Error	LBLP01014035.1	13055	47093	-	98.87	78.14
NM_183372.5	200030	CHM13 Default 5% Error	LBLP01014039.1	1036	18050	-	97.76	13.62
NM_001290224.1	7179	CHM13 Default 5% Error	LBLP01014432.1	5152	20965	+	99.48	54.07
NM_001290224.1	7179	CHM13 Default 5% Error	LBLP01014418.1	35724	84799	+	99.67	36.6
NM_199261.3	7179	CHM13 Default 5% Error	LBLP01014432.1	5152	20965	+	99.48	48.67
NM_199261.3	7179	CHM13 Default 5% Error	LBLP01014418.1	35724	84799	+	99.74	42.92
NM_199260.3	7179	CHM13 Default 5% Error	LBLP01014432.1	5152	20965	+	99.48	50.77
NM_199260.3	7179	CHM13 Default 5% Error	LBLP01014418.1	35724	84799	+	99.72	40.47
NM_199259.3	7179	CHM13 Default 5% Error	LBLP01014432.1	5152	20965	+	99.48	49.64
NM_199259.3	7179	CHM13 Default 5% Error	LBLP01014418.1	35724	84799	+	99.73	41.79
NM_130797.3	1804	CHM13 Default 5% Error	LBLP01014150.1	269313	743389	+	99.22	87.88
NM_130797.3	1804	CHM13 Default 5% Error	LBLP01001667.1	24894	25548	-	99.23	13.53
NM_001290253.1	1804	CHM13 Default 5% Error	LBLP01014150.1	269313	438078	+	99.02	71.02
NM_001290253.1	1804	CHM13 Default 5% Error	LBLP01001667.1	24902	25548	-	99.84	31.31
NM_001291314.1	5554	CHM13 Default 5% Error	LBLP01008417.1	19938434	20225207	+	99.81	94.63
NM_001291315.1	5554	CHM13 Default 5% Error	LBLP01008417.1	19938434	20225207	+	99.79	94.01
NM_000947.4	5558	CHM13 Default 5% Error	LBLP01015141.1	6795	15229	-	99.82	24.07
NM_000947.4	5558	CHM13 Default 5% Error	LBLP01001825.1	13930	52378	-	98.65	44.86
NM_000947.4	5558	CHM13 Default 5% Error	LBLP01015130.1	946	19285	-	94.72	13.56
NM_001276343.2	119016	CHM13 Default 5% Error	LBLP01004376.1	105	6768	+	99.68	75.61
NM_001276343.2	119016	CHM13 Default 5% Error	LBLP01000447.1	2185	18274	-	99.39	26.15
NM_001291379.1	119016	CHM13 Default 5% Error	LBLP01004376.1	943	6768	+	99.73	69.83
NM_001291379.1	119016	CHM13 Default 5% Error	LBLP01000447.1	2185	24650	-	98.47	31.37
NM_133446.3	119016	CHM13 Default 5% Error	LBLP01004376.1	105	6768	+	99.68	77.75
NM_133446.3	119016	CHM13 Default 5% Error	LBLP01000447.1	2185	18274	-	99.32	24.07
NM_001145064.2	729438	CHM13 Default 5% Error	LBLP01000981.1	57686	81182	-	99.83	96.67
NM_016245.4	51170	CHM13 Default 5% Error	LBLP01013978.1	6646917	6667814	-	99.81	58.2
NM_016245.4	51170	CHM13 Default 5% Error	LBLP01013982.1	2152	36182	-	99.67	48.76
NM_152286.4	375775	CHM13 Default 5% Error	LBLP01014493.1	138974	180853	-	99.93	62.91
NM_152286.4	375775	CHM13 Default 5% Error	LBLP01001808.1	601917	646849	+	100	33.95
NM_001098537.2	375775	CHM13 Default 5% Error	LBLP01014493.1	138974	180853	-	99.93	61.93
NM_001098537.2	375775	CHM13 Default 5% Error	LBLP01001808.1	601917	646849	+	100	34.97
NM_001145440.2	441250	CHM13 Default 5% Error	LBLP01004514.1	28843	30057	+	100	38.48
NM_001145440.2	441250	CHM13 Default 5% Error	LBLP01004508.1	1264041	1369102	+	98.23	42.6
NM_001145440.2	441250	CHM13 Default 5% Error	LBLP01004513.1	9988	58642	+	96.11	14.44
NM_001145440.2	441250	CHM13 Default 5% Error	LBLP01001864.1	10963	23284	-	99.64	8.92
NM_016931.4	50507	CHM13 Default 5% Error	LBLP01013755.1	14758	45488	+	99.24	67.45
NM_016931.4	50507	CHM13 Default 5% Error	LBLP01000040.1	98736	190324	+	99.85	31.24
NM_001143836.2	50507	CHM13 Default 5% Error	LBLP01013755.1	14758	45488	+	99.31	66.55
NM_001143836.2	50507	CHM13 Default 5% Error	LBLP01000040.1	98736	190326	+	99.78	32.15
NM_001291926.1	50507	CHM13 Default 5% Error	LBLP01013755.1	14758	45488	+	99.24	67.51
NM_001291926.1	50507	CHM13 Default 5% Error	LBLP01000040.1	98736	190324	+	99.85	31.17
NM_001291927.1	50507	CHM13 Default 5% Error	LBLP01013755.1	14758	45488	+	99.24	71.46
NM_001291927.1	50507	CHM13 Default 5% Error	LBLP01000040.1	99324	190324	+	99.65	27.15
NM_001291929.1	50507	CHM13 Default 5% Error	LBLP01013755.1	14758	45488	+	99.24	72.97
NM_001291929.1	50507	CHM13 Default 5% Error	LBLP01000040.1	99564	190324	+	100	25.61
NM_032351.5	84311	CHM13 Default 5% Error	LBLP01001064.1	164654	181269	-	99.91	69.32
NM_032351.5	84311	CHM13 Default 5% Error	LBLP01001543.1	43785	46230	+	99.8	30.37
NM_001278279.2	84311	CHM13 Default 5% Error	LBLP01001064.1	164654	181269	-	99.9	66.36
NM_001278279.2	84311	CHM13 Default 5% Error	LBLP01001543.1	43785	46230	+	99.8	33.26
NM_000842.4	2915	CHM13 Default 5% Error	LBLP01013628.1	10588172	10933852	-	99.94	86.77
NM_000842.4	2915	CHM13 Default 5% Error	LBLP01013763.1	43976	80675	+	96.38	14.54
NM_001292009.1	346007	CHM13 Default 5% Error	LBLP01000034.1	17583	1600971	+	99.96	78.39
NM_001292009.1	346007	CHM13 Default 5% Error	LBLP01000011.1	20301973	20671935	+	100	21.62
NM_182543.3	221078	CHM13 Default 5% Error	LBLP01006484.1	13919445	13985175	+	99.85	52.8
NM_182543.3	221078	CHM13 Default 5% Error	LBLP01013275.1	5255	12039	+	99.26	47.31
NM_001297740.1	6902	CHM13 Default 5% Error	LBLP01001670.1	14032132	14032325	+	93.87	32.37
NM_001300995.1	50507	CHM13 Default 5% Error	LBLP01013755.1	14758	45488	+	99.31	71.09
NM_001300995.1	50507	CHM13 Default 5% Error	LBLP01000040.1	98081	190326	+	99.82	27.52
NM_015326.4	23380	CHM13 Default 5% Error	LBLP01014050.1	4936	53484	+	99.79	71.9
NM_015326.4	23380	CHM13 Default 5% Error	LBLP01014048.1	2003	25353	+	95.68	14.98
NM_015326.4	23380	CHM13 Default 5% Error	LBLP01014045.1	52416	123696	+	98.26	10.98
NM_001170637.3	23380	CHM13 Default 5% Error	LBLP01014050.1	4936	53484	+	99.79	71.93
NM_001170637.3	23380	CHM13 Default 5% Error	LBLP01014048.1	2003	25353	+	95.67	14.94
NM_001170637.3	23380	CHM13 Default 5% Error	LBLP01014045.1	52416	123696	+	98.26	10.98
NM_001300952.1	23380	CHM13 Default 5% Error	LBLP01014050.1	4936	45210	+	100	61.46
NM_001300952.1	23380	CHM13 Default 5% Error	LBLP01014048.1	2003	25353	+	95.67	20.6
NM_001300952.1	23380	CHM13 Default 5% Error	LBLP01014045.1	52416	123696	+	98.26	15.14
NM_001301064.1	54700	CHM13 Default 5% Error	LBLP01000527.1	39831	66068	-	100	90.4
NM_018427.4	54700	CHM13 Default 5% Error	LBLP01000527.1	39831	66268	-	99.97	90.76
NM_024848.2	79906	CHM13 Default 5% Error	LBLP01001443.1	265551	320824	+	100	79.06
NM_024848.2	79906	CHM13 Default 5% Error	LBLP01001050.1	1480318	1483212	-	99.73	20.46
NM_001301233.1	574537	CHM13 Default 5% Error	LBLP01001672.1	6106	17083	+	100	69.54
NM_001252274.2	10941	CHM13 Default 5% Error	LBLP01004264.1	1557	60330	-	99.84	60.92
NM_006798.4	10941	CHM13 Default 5% Error	LBLP01004264.1	1557	60330	-	99.78	53.59
NM_001252275.2	10941	CHM13 Default 5% Error	LBLP01004264.1	1557	60330	-	99.78	53.59
NM_001301239.1	10941	CHM13 Default 5% Error	LBLP01004264.1	1557	54776	-	99.75	49.93
NM_032167.4	92017	CHM13 Default 5% Error	LBLP01013675.1	7125327	7657670	-	99.49	96.04
NM_001302371.1	100132406	CHM13 Default 5% Error	LBLP01013023.1	73	31926	-	98.37	42.3
NM_001302371.1	100132406	CHM13 Default 5% Error	LBLP01014772.1	2605	22703	+	96.53	20.69
NM_001302371.1	100132406	CHM13 Default 5% Error	LBLP01014528.1	581	6221	-	95.09	9.03
NM_014695.2	9720	CHM13 Default 5% Error	LBLP01014714.1	12798	43371	-	99.69	50.8
NM_014695.2	9720	CHM13 Default 5% Error	LBLP01014713.1	1701654	1715241	-	99.83	40.85
NM_014695.2	9720	CHM13 Default 5% Error	LBLP01014715.1	10778	13502	-	99.79	8.45
NM_000868.3	3358	CHM13 Default 5% Error	LBLP01015402.1	13767	89943	+	99.36	78.78
NM_000868.3	3358	CHM13 Default 5% Error	LBLP01014085.1	99280	246812	-	99.9	22.55
NM_001256760.2	3358	CHM13 Default 5% Error	LBLP01015402.1	27861	89943	+	99.51	76.45
NM_001256760.2	3358	CHM13 Default 5% Error	LBLP01014085.1	99280	246812	-	99.91	24
NM_001256761.2	3358	CHM13 Default 5% Error	LBLP01015402.1	13767	89943	+	99.47	77.96
NM_001256761.2	3358	CHM13 Default 5% Error	LBLP01014085.1	99280	246812	-	99.9	23.01
NM_001304548.1	286464	CHM13 Default 5% Error	LBLP01014740.1	7387	247468	-	100	60.34
NM_001304548.1	286464	CHM13 Default 5% Error	LBLP01014104.1	1254	224107	+	99.22	40.27
NM_001306068.1	100288687	CHM13 Default 5% Error	LBLP01002518.1	29881	30837	-	96.89	31.92
NM_018401.2	55351	CHM13 Default 5% Error	LBLP01013417.1	3986	58314	+	99.84	74.13
NM_018401.2	55351	CHM13 Default 5% Error	LBLP01013415.1	810573	1175801	+	100	25.75
NM_001306082.1	55351	CHM13 Default 5% Error	LBLP01013417.1	3986	58314	+	99.84	71.87
NM_001306082.1	55351	CHM13 Default 5% Error	LBLP01013415.1	810573	1175801	+	100	28
NM_001306135.1	220107	CHM13 Default 5% Error	LBLP01014085.1	1439228	1439609	+	99.21	27.92
NM_001308117.1	54715	CHM13 Default 5% Error	LBLP01013675.1	91273	750469	+	100	81.71
NM_001308117.1	54715	CHM13 Default 5% Error	LBLP01013693.1	3455594	4090783	+	100	18.52
NM_198567.5	375484	CHM13 Default 5% Error	LBLP01013379.1	1505411	1557133	-	100	86.52
NM_002847.4	5799	CHM13 Default 5% Error	LBLP01013949.1	628820	1232912	-	99.94	78.46
NM_002847.4	5799	CHM13 Default 5% Error	LBLP01013950.1	21241	444169	-	99.8	21.48
NM_130842.3	5799	CHM13 Default 5% Error	LBLP01013949.1	628820	1232912	-	99.94	79.29
NM_130842.3	5799	CHM13 Default 5% Error	LBLP01013950.1	21241	444169	-	99.79	20.65
NM_130843.3	5799	CHM13 Default 5% Error	LBLP01013949.1	628820	1232912	-	99.94	78.06
NM_130843.3	5799	CHM13 Default 5% Error	LBLP01013950.1	21241	444169	-	99.8	21.87
NM_001308267.1	5799	CHM13 Default 5% Error	LBLP01013949.1	628820	1232912	-	99.94	80.35
NM_001308267.1	5799	CHM13 Default 5% Error	LBLP01013950.1	21241	444169	-	99.78	19.59
NM_001308268.1	5799	CHM13 Default 5% Error	LBLP01013949.1	628820	1232912	-	99.94	76.78
NM_001308268.1	5799	CHM13 Default 5% Error	LBLP01013950.1	21241	398141	-	99.82	23.16
NM_001310136.1	728734	CHM13 Default 5% Error	LBLP01001327.1	9106	19551	+	99.32	90.3
NM_001310148.1	440345	CHM13 Default 5% Error	LBLP01013389.1	5262	27968	+	98.81	87.03
NM_001310154.1	400986	CHM13 Default 5% Error	LBLP01014381.1	1589	40089	+	93.8	38.94
NM_001310154.1	400986	CHM13 Default 5% Error	LBLP01000392.1	1800	44984	-	99.48	31.3
NM_001310154.1	400986	CHM13 Default 5% Error	LBLP01001248.1	1172	38540	+	98.22	24.39
NM_001310154.1	400986	CHM13 Default 5% Error	LBLP01014414.1	1265	15272	-	99.29	6.99
NM_001271870.2	647135	CHM13 Default 5% Error	LBLP01013953.1	30832	49726	-	99.79	86.1
NM_001311200.1	1207	CHM13 Default 5% Error	LBLP01013631.1	1916195	1934364	-	89.68	58.22
NM_001311201.1	1207	CHM13 Default 5% Error	LBLP01013631.1	1916195	1934364	-	88.48	54.65
NM_001311202.1	1207	CHM13 Default 5% Error	LBLP01013631.1	1916195	1916919	-	89.95	61.13
NM_198076.5	116228	CHM13 Default 5% Error	LBLP01014672.1	850569	865797	-	83.24	13.11
NM_001001325.2	408187	CHM13 Default 5% Error	LBLP01001670.1	3843733	3849449	+	97.73	77.99
NM_001187.1	574	CHM13 CA Sensitive 5% Error	LDNV01005073.1	13849	15875	+	100	61.75
NM_004476.1	2346	CHM13 CA Sensitive 5% Error	LDNV01000002.1	69760	129319	-	98.71	85.57
[truncated: 2,089 more rows]

## Sheet: FS_CHM13denovo_CHM1_1.1_GRCh38
#assembly_acc	protein_acc	NCBIGeneID	GeneSymbol	observation
GCA_000983455.1	NP_001131073.1	100128927	ZBTB42	FS
GCA_000983455.1	NP_001157929.1	100131980	ZNF705G	FS
GCA_000983455.1	NP_001180559.1	100132396	ZNF705B	FS
GCA_000983455.1	NP_001265516.1	100134391	LOC100134391	FS
GCA_000983455.1	NP_001107875.1	100134938	UPK3BL	FS
GCA_000983455.1	NP_878908.4	100287171	WASH1	FS
GCA_000983455.1	NP_000238.1	100507436	MICA	FS
GCA_000983455.1	NP_001186752.1	100528064	NEDD8-MDP1	FS
GCA_000983455.1	NP_001230469.1	100653515	CEP295NL	FS
GCA_000983455.1	NP_001230470.1	100653515	CEP295NL	FS
GCA_000983455.1	NP_001157934.1	10071	MUC12	FS
GCA_000983455.1	NP_001273740.1	100996693	LOC100996693	FS
GCA_000983455.1	NP_001263183.2	101180976	IFNL4	FS
GCA_000983455.1	NP_001073346.2	10156	RASA4	FS
GCA_000983455.1	NP_008920.5	10156	RASA4	FS
GCA_000983455.1	NP_001253.1	1031	CDKN2C	FS
GCA_000983455.1	NP_523240.1	1031	CDKN2C	FS
GCA_000983455.1	NP_006330.2	10362	HMG20B	FS
GCA_000983455.1	NP_006549.1	10656	KHDRBS3	FS
GCA_000983455.1	NP_006603.2	10749	KIF1C	FS
GCA_000983455.1	NP_001269916.1	10901	DHRS4	FS
GCA_000983455.1	NP_001269917.1	10901	DHRS4	FS
GCA_000983455.1	NP_001269918.1	10901	DHRS4	FS
GCA_000983455.1	NP_001269919.1	10901	DHRS4	FS
GCA_000983455.1	NP_001269920.1	10901	DHRS4	FS
GCA_000983455.1	NP_066284.2	10901	DHRS4	FS
GCA_000983455.1	NP_932079.1	10917	BTNL3	FS
GCA_000983455.1	NP_001120700.1	10951	CBX1	FS
GCA_000983455.1	NP_006798.1	10951	CBX1	FS
GCA_000983455.1	NP_001291386.1	10990	LILRB5	FS
GCA_000983455.1	NP_075571.1	11132	CAPN10	FS
GCA_000983455.1	NP_001154993.1	11275	KLHL2	FS
GCA_000983455.1	NP_001154994.1	11275	KLHL2	FS
GCA_000983455.1	NP_009177.3	11275	KLHL2	FS
GCA_000983455.1	NP_001096064.1	113878	DTX2	FS
GCA_000983455.1	NP_001096065.1	113878	DTX2	FS
GCA_000983455.1	NP_001096066.1	113878	DTX2	FS
GCA_000983455.1	NP_065943.2	113878	DTX2	FS
GCA_000983455.1	NP_001265354.1	114780	PKD1L2	FS
GCA_000983455.1	NP_443124.3	114780	PKD1L2	FS
GCA_000983455.1	NP_443130.1	114786	XKR4	FS
GCA_000983455.1	NP_619635.1	116444	GRIN3B	FS
GCA_000983455.1	NP_001231817.1	116987	AGAP1	FS
GCA_000983455.1	NP_001036000.1	116988	AGAP3	FS
GCA_000983455.1	NP_001295233.1	116988	AGAP3	FS
GCA_000983455.1	NP_114152.3	116988	AGAP3	FS
GCA_000983455.1	NP_001229797.1	122060	SLAIN1	FS
GCA_000983455.1	NP_001010846.1	126669	SHE	FS
GCA_000983455.1	NP_001004692.1	127064	OR2T12	FS
GCA_000983455.1	NP_001004696.1	127074	OR2T4	FS
GCA_000983455.1	NP_848552.1	128611	ZNF831	FS
GCA_000983455.1	NP_620155.1	129868	TRIM43	FS
GCA_000983455.1	NP_001005161.2	143496	OR52B4	FS
GCA_000983455.1	NP_001186750.1	145553	MDP1	FS
GCA_000983455.1	NP_612485.2	145553	MDP1	FS
GCA_000983455.1	NP_001096082.2	145814	PGPEP1L	FS
GCA_000983455.1	NP_001161374.1	145814	PGPEP1L	FS
GCA_000983455.1	NP_001290199.1	146754	DNAH2	FS
GCA_000983455.1	NP_001257817.1	1468	SLC25A10	FS
GCA_000983455.1	NP_001257882.1	1468	SLC25A10	FS
GCA_000983455.1	NP_036272.2	1468	SLC25A10	FS
GCA_000983455.1	NP_001284553.1	147657	ZNF480	FS
GCA_000983455.1	NP_653285.2	147657	ZNF480	FS
GCA_000983455.1	NP_612143.2	148213	ZNF681	FS
GCA_000983455.1	NP_997211.2	150763	GPAT2	FS
GCA_000983455.1	NP_955368.1	151313	FAHD2B	FS
GCA_000983455.1	NP_001073980.2	154790	CLEC2L	FS
GCA_000983455.1	NP_000768.1	1577	CYP3A5	FS
GCA_000983455.1	NP_001177413.1	1577	CYP3A5	FS
GCA_000983455.1	NP_001278759.1	1577	CYP3A5	FS
GCA_000983455.1	NP_000769.2	1579	CYP4A11	FS
GCA_000983455.1	NP_000770.2	1580	CYP4B1	FS
GCA_000983455.1	NP_001093242.1	1580	CYP4B1	FS
GCA_000983455.1	NP_000491.4	1589	CYP21A2	FS
GCA_000983455.1	NP_001122062.3	1589	CYP21A2	FS
GCA_000983455.1	NP_001006939.2	158931	TCEAL6	FS
GCA_000983455.1	NP_714544.1	161497	STRC	FS
GCA_000983455.1	NP_722520.2	161882	ZFPM1	FS
GCA_000983455.1	NP_612152.1	168507	PKD1L1	FS
GCA_000983455.1	NP_004937.1	1794	DOCK2	FS
GCA_000983455.1	NP_061889.2	192666	KRT24	FS
GCA_000983455.1	NP_001400.3	1953	MEGF6	FS
GCA_000983455.1	NP_997320.2	196385	DNAH10	FS
GCA_000983455.1	NP_660337.3	197335	WDR90	FS
GCA_000983455.1	NP_963840.2	200008	CDCP2	FS
GCA_000983455.1	NP_001095133.3	200030	NBPF11	FS
GCA_000983455.1	NP_899228.4	200030	NBPF11	FS
GCA_000983455.1	NP_001161719.1	200172	SLFNL1	FS
GCA_000983455.1	NP_001287788.1	200172	SLFNL1	FS
GCA_000983455.1	NP_659427.3	200172	SLFNL1	FS
GCA_000983455.1	NP_001438.1	2196	FAT2	FS
GCA_000983455.1	NP_848602.1	220323	OAF	FS
GCA_000983455.1	NP_001008701.1	22859	ADGRL1	FS
GCA_000983455.1	NP_055736.2	22859	ADGRL1	FS
GCA_000983455.1	NP_996882.1	23019	CNOT1	FS
GCA_000983455.1	NP_055918.2	23129	PLXND1	FS
GCA_000983455.1	NP_001014986.1	2346	FOLH1	FS
GCA_000983455.1	NP_001180400.1	2346	FOLH1	FS
GCA_000983455.1	NP_001180401.1	2346	FOLH1	FS
GCA_000983455.1	NP_004467.1	2346	FOLH1	FS
GCA_000983455.1	NP_056170.2	23512	SUZ12	FS
GCA_000983455.1	NP_000795.2	2352	FOLR3	FS
GCA_000983455.1	NP_001162577.1	253725	FAM21C	FS
GCA_000983455.1	NP_001162578.1	253725	FAM21C	FS
GCA_000983455.1	NP_056077.2	253725	FAM21C	FS
GCA_000983455.1	NP_001265227.1	256076	COL6A5	FS
GCA_000983455.1	NP_001123199.1	25894	PLEKHG4	FS
GCA_000983455.1	NP_001123200.1	25894	PLEKHG4	FS
GCA_000983455.1	NP_001123201.1	25894	PLEKHG4	FS
GCA_000983455.1	NP_001123203.1	25894	PLEKHG4	FS
GCA_000983455.1	NP_001161750.1	25937	WWTR1	FS
GCA_000983455.1	NP_001161752.1	25937	WWTR1	FS
GCA_000983455.1	NP_056287.1	25937	WWTR1	FS
GCA_000983455.1	NP_001263211.1	26033	ATRNL1	FS
GCA_000983455.1	NP_997186.1	26033	ATRNL1	FS
GCA_000983455.1	NP_056412.5	26086	GPSM1	FS
GCA_000983455.1	NP_036305.2	26260	FBXO25	FS
GCA_000983455.1	NP_001005224.1	26683	OR4F3	FS
GCA_000983455.1	NP_001304036.1	26687	OR4E1	FS
GCA_000983455.1	NP_001275762.1	2678	GGT1	FS
GCA_000983455.1	NP_038265.2	2678	GGT1	FS
GCA_000983455.1	NP_038347.2	2678	GGT1	FS
GCA_000983455.1	NP_060040.1	26873	OPLAH	FS
GCA_000983455.1	NP_001107579.1	27295	PDLIM3	FS
GCA_000983455.1	NP_001244891.1	27295	PDLIM3	FS
GCA_000983455.1	NP_001244892.1	27295	PDLIM3	FS
GCA_000983455.1	NP_055291.2	27295	PDLIM3	FS
GCA_000983455.1	NP_776173.3	283417	DPY19L2	FS
GCA_000983455.1	NP_001291317.1	283685	GOLGA6L2	FS
GCA_000983455.1	NP_001230467.1	283710	LOC283710	FS
GCA_000983455.1	NP_001001413.3	283767	GOLGA6L1	FS
GCA_000983455.1	NP_061994.1	284352	PPP1R37	FS
GCA_000983455.1	NP_001034606.1	284618	RUSC1-AS1	FS
GCA_000983455.1	NP_778234.2	285955	SPDYE1	FS
GCA_000983455.1	NP_954586.4	286380	FOXD4L3	FS
GCA_000983455.1	NP_001291477.1	286464	CFAP47	FS
GCA_000983455.1	NP_001280118.1	29991	OBP2A	FS
GCA_000983455.1	NP_001091672.1	3090	HIC1	FS
GCA_000983455.1	NP_006488.2	3090	HIC1	FS
GCA_000983455.1	NP_000862.1	3362	HTR6	FS
GCA_000983455.1	NP_853643.1	337973	KRTAP19-6	FS
GCA_000983455.1	NP_848632.2	338707	B4GALNT4	FS
GCA_000983455.1	NP_001012661.1	339344	MYPOP	FS
GCA_000983455.1	NP_001034450.3	343071	PRAMEF10	FS
GCA_000983455.1	NP_997246.2	344148	NCKAP5	FS
GCA_000983455.1	NP_001008784.2	344807	CD200R1L	FS
GCA_000983455.1	NP_001186144.1	344807	CD200R1L	FS
GCA_000983455.1	NP_899231.2	345062	PRSS48	FS
GCA_000983455.1	NP_001004450.1	347169	OR1B1	FS
GCA_000983455.1	NP_001193934.1	353355	ZNF233	FS
GCA_000983455.1	NP_861421.2	353355	ZNF233	FS
GCA_000983455.1	NP_002182.1	3623	INHA	FS
GCA_000983455.1	NP_055030.1	3645	INSRR	FS
GCA_000983455.1	NP_001072996.1	368	ABCC6	FS
GCA_000983455.1	NP_000202.3	3689	ITGB2	FS
GCA_000983455.1	NP_001120963.2	3689	ITGB2	FS
GCA_000983455.1	NP_001290167.1	3689	ITGB2	FS
GCA_000983455.1	NP_002212.3	3707	ITPKB	FS
GCA_000983455.1	NP_000206.2	3718	JAK3	FS
GCA_000983455.1	NP_001138501.1	374860	ANKRD30B	FS
GCA_000983455.1	NP_940982.1	376497	SLC27A1	FS
GCA_000983455.1	NP_001268900.1	3809	KIR2DS4	FS
GCA_000983455.1	NP_001268901.1	3809	KIR2DS4	FS
GCA_000983455.1	NP_001019572.1	388228	SBK1	FS
GCA_000983455.1	NP_001025054.1	388939	C2orf71	FS
GCA_000983455.1	NP_001004754.1	390064	OR51I2	FS
GCA_000983455.1	NP_001258871.1	390231	TRIM77	FS
GCA_000983455.1	NP_001005183.1	390326	OR6C76	FS
GCA_000983455.1	NP_001005503.1	390439	OR11G2	FS
GCA_000983455.1	NP_006211.2	390502	SERPINA2	FS
GCA_000983455.1	NP_001159827.1	3955	LFNG	FS
GCA_000983455.1	NP_001180417.1	3987	LIMS1	FS
GCA_000983455.1	NP_004978.2	3987	LIMS1	FS
GCA_000983455.1	NP_510880.2	399687	MYO18A	FS
GCA_000983455.1	NP_976063.1	399687	MYO18A	FS
GCA_000983455.1	NP_775922.2	401024	FSIP2	FS
GCA_000983455.1	NP_001177750.1	4092	SMAD7	FS
GCA_000983455.1	NP_005895.1	4092	SMAD7	FS
GCA_000983455.1	NP_005353.1	4102	MAGEA3	FS
GCA_000983455.1	NP_005354.1	4105	MAGEA6	FS
GCA_000983455.1	NP_787064.1	4105	MAGEA6	FS
GCA_000983455.1	NP_001001417.6	414059	TBC1D3B	FS
GCA_000983455.1	NP_001071133.2	414189	AGAP6	FS
GCA_000983455.1	NP_002369.2	4145	MATK	FS
GCA_000983455.1	NP_647612.1	4145	MATK	FS
GCA_000983455.1	NP_005925.2	4298	MLLT1	FS
GCA_000983455.1	NP_001004328.1	440077	ZNF705A	FS
GCA_000983455.1	NP_001258593.2	440243	GOLGA6L22	FS
GCA_000983455.1	NP_001293023.1	440348	NPIPB15	FS
GCA_000983455.1	NP_001026789.2	441273	SPDYE2	FS
GCA_000983455.1	NP_001005243.1	441639	OR9K2	FS
GCA_000983455.1	NP_005951.1	4584	MUC3A	FS
GCA_000983455.1	NP_000250.3	4644	MYO5A	FS
GCA_000983455.1	NP_001135967.1	4644	MYO5A	FS
GCA_000983455.1	NP_001120651.2	4647	MYO7A	FS
GCA_000983455.1	NP_055331.1	4849	CNOT3	FS
GCA_000983455.1	NP_001191448.1	5026	P2RX5	FS
GCA_000983455.1	NP_002552.2	5026	P2RX5	FS
GCA_000983455.1	NP_001269700.1	51281	ANKMY1	FS
GCA_000983455.1	NP_001269709.1	51281	ANKMY1	FS
GCA_000983455.1	NP_001269710.1	51281	ANKMY1	FS
GCA_000983455.1	NP_001295304.1	51281	ANKMY1	FS
GCA_000983455.1	NP_057636.2	51281	ANKMY1	FS
GCA_000983455.1	NP_006199.2	5167	ENPP1	FS
GCA_000983455.1	NP_001229850.1	5360	PLTP	FS
GCA_000983455.1	NP_006218.1	5360	PLTP	FS
GCA_000983455.1	NP_001009939.1	5413	2016-09-05	FS
GCA_000983455.1	NP_002679.2	5413	2016-09-05	FS
GCA_000983455.1	NP_001229518.1	54210	TREM1	FS
GCA_000983455.1	NP_001229519.1	54210	TREM1	FS
GCA_000983455.1	NP_061113.1	54210	TREM1	FS
GCA_000983455.1	NP_005026.3	5442	POLRMT	FS
GCA_000983455.1	NP_061927.2	54537	FAM35A	FS
GCA_000983455.1	NP_001136024.1	54798	DCHS2	FS
GCA_000983455.1	NP_056405.2	54865	GPATCH4	FS
GCA_000983455.1	NP_872620.1	54865	GPATCH4	FS
GCA_000983455.1	NP_060251.2	54905	CYP2W1	FS
GCA_000983455.1	NP_001230271.1	55036	CCDC40	FS
GCA_000983455.1	NP_001274314.1	554282	FAM72C	FS
GCA_000983455.1	NP_059982.2	55556	ENOSF1	FS
GCA_000983455.1	NP_060522.3	55697	VAC14	FS
GCA_000983455.1	NP_001263318.1	55857	KIZ	FS
GCA_000983455.1	NP_061122.4	55889	GOLGA6B	FS
GCA_000983455.1	NP_001153772.1	56666	PANX2	FS
GCA_000983455.1	NP_443071.2	56666	PANX2	FS
GCA_000983455.1	NP_001155091.1	56931	DUS3L	FS
GCA_000983455.1	NP_064560.2	56931	DUS3L	FS
GCA_000983455.1	NP_065770.1	57479	PRR12	FS
GCA_000983455.1	NP_001693.2	575	ADGRB1	FS
GCA_000983455.1	NP_001273510.1	57661	PHRF1	FS
GCA_000983455.1	NP_001273511.1	57661	PHRF1	FS
GCA_000983455.1	NP_001273512.1	57661	PHRF1	FS
GCA_000983455.1	NP_065952.2	57661	PHRF1	FS
GCA_000983455.1	NP_079466.3	57730	ANKRD36B	FS
GCA_000983455.1	NP_067072.3	58533	SNX6	FS
GCA_000983455.1	NP_689419.2	58533	SNX6	FS
GCA_000983455.1	NP_004752.1	5863	RGL2	FS
GCA_000983455.1	NP_006258.3	5903	RANBP2	FS
GCA_000983455.1	NP_067648.1	59351	PBOV1	FS
GCA_000983455.1	NP_071376.1	63923	TNN	FS
GCA_000983455.1	NP_071398.3	63977	PRDM15	FS
GCA_000983455.1	NP_067643.3	64236	PDLIM2	FS
GCA_000983455.1	NP_001182163.1	642612	TRIM49C	FS
GCA_000983455.1	NP_001139190.1	643311	CT47B1	FS
GCA_000983455.1	NP_001116540.1	644591	PPIAL4G	FS
GCA_000983455.1	NP_001129624.1	644974	ALG1L2	FS
GCA_000983455.1	NP_077078.5	64499	TPSB2	FS
GCA_000983455.1	NP_001123512.1	6464	SHC1	FS
GCA_000983455.1	NP_001123513.1	6464	SHC1	FS
GCA_000983455.1	NP_001189788.1	6464	SHC1	FS
GCA_000983455.1	NP_003020.2	6464	SHC1	FS
GCA_000983455.1	NP_892113.4	6464	SHC1	FS
GCA_000983455.1	NP_001078921.2	647060	SPATA31A1	FS
GCA_000983455.1	NP_075055.1	64926	RASAL3	FS
GCA_000983455.1	NP_998754.1	65059	RAPH1	FS
GCA_000983455.1	NP_001107604.1	65065	NBEAL1	FS
GCA_000983455.1	NP_001269401.1	653073	GOLGA8J	FS
GCA_000983455.1	NP_001269422.1	653125	GOLGA8K	FS
GCA_000983455.1	NP_003043.3	6569	SLC34A1	FS
GCA_000983455.1	NP_001278341.1	6651	SON	FS
GCA_000983455.1	NP_620305.2	6651	SON	FS
GCA_000983455.1	NP_008874.2	6666	SOX12	FS
GCA_000983455.1	NP_001129611.1	6929	TCF3	FS
GCA_000983455.1	NP_003191.1	6929	TCF3	FS
GCA_000983455.1	NP_001087197.1	6954	TCP11	FS
GCA_000983455.1	NP_001248746.1	6954	TCP11	FS
GCA_000983455.1	NP_001248747.1	6954	TCP11	FS
GCA_000983455.1	NP_001248748.1	6954	TCP11	FS
GCA_000983455.1	NP_733796.2	7050	TGIF1	FS
GCA_000983455.1	NP_001073862.1	727936	GXYLT2	FS
GCA_000983455.1	NP_001073610.1	728062	CT47A6	FS
GCA_000983455.1	NP_001034704.2	728957	ZNF705D	FS
GCA_000983455.1	NP_001269230.1	729159	LOC729159	FS
GCA_000983455.1	NP_001120684.1	729447	GAGE2A	FS
GCA_000983455.1	NP_001019832.2	729528	PRAMEF14	FS
GCA_000983455.1	NP_001139682.2	729597	SPDYE6	FS
GCA_000983455.1	NP_003377.2	7455	ZAN	FS
GCA_000983455.1	NP_775082.2	7455	ZAN	FS
GCA_000983455.1	NP_001171501.1	7536	SF1	FS
GCA_000983455.1	NP_001120844.1	7637	ZNF84	FS
GCA_000983455.1	NP_001276900.1	7637	ZNF84	FS
GCA_000983455.1	NP_001276901.1	7637	ZNF84	FS
GCA_000983455.1	NP_003419.3	7637	ZNF84	FS
GCA_000983455.1	NP_001103824.1	7784	ZP3	FS
GCA_000983455.1	NP_009086.4	7784	ZP3	FS
GCA_000983455.1	NP_076987.3	79057	PRRG3	FS
GCA_000983455.1	NP_077019.2	79097	TRIM48	FS
GCA_000983455.1	NP_001180457.1	79634	SCRN3	FS
GCA_000983455.1	NP_078859.2	79634	SCRN3	FS
GCA_000983455.1	NP_078936.1	79713	IGFLR1	FS
GCA_000983455.1	NP_068591.2	79748	LMAN1L	FS
GCA_000983455.1	NP_001138776.1	80726	KIAA1683	FS
GCA_000983455.1	NP_001138777.1	80726	KIAA1683	FS
GCA_000983455.1	NP_079525.1	80726	KIAA1683	FS
GCA_000983455.1	NP_085059.2	80781	COL18A1	FS
GCA_000983455.1	NP_569711.2	80781	COL18A1	FS
GCA_000983455.1	NP_569712.2	80781	COL18A1	FS
GCA_000983455.1	NP_004634.1	8106	PABPN1	FS
GCA_000983455.1	NP_112193.1	81623	DEFB126	FS
GCA_000983455.1	NP_001230182.1	81789	TIGD6	FS
GCA_000983455.1	NP_112215.1	81789	TIGD6	FS
GCA_000983455.1	NP_004810.2	8189	SYMPK	FS
GCA_000983455.1	NP_005668.2	8292	COLQ	FS
GCA_000983455.1	NP_536799.1	8292	COLQ	FS
GCA_000983455.1	NP_536800.2	8292	COLQ	FS
GCA_000983455.1	NP_003545.1	8388	OR1E2	FS
GCA_000983455.1	NP_001269331.1	83881	MIXL1	FS
GCA_000983455.1	NP_114150.1	83881	MIXL1	FS
GCA_000983455.1	NP_001153800.1	84258	SYT3	FS
GCA_000983455.1	NP_001153801.1	84258	SYT3	FS
GCA_000983455.1	NP_115674.1	84258	SYT3	FS
GCA_000983455.1	NP_001167563.1	84548	TMEM185A	FS
GCA_000983455.1	NP_115897.1	84548	TMEM185A	FS
GCA_000983455.1	NP_001120936.2	84627	ZNF469	FS
GCA_000983455.1	NP_115927.1	84630	TTBK1	FS
GCA_000983455.1	NP_115968.1	84666	RETNLB	FS
GCA_000983455.1	NP_001073160.1	84689	MS4A14	FS
GCA_000983455.1	NP_001248756.1	84689	MS4A14	FS
GCA_000983455.1	NP_001248757.1	84689	MS4A14	FS
GCA_000983455.1	NP_115986.3	84689	MS4A14	FS
GCA_000983455.1	NP_001138678.1	85379	KIAA1671	FS
GCA_000983455.1	NP_001295192.1	8731	RNMT	FS
GCA_000983455.1	NP_003790.1	8731	RNMT	FS
GCA_000983455.1	NP_001265273.1	88	ACTN2	FS
GCA_000983455.1	NP_001075.1	8985	PLOD3	FS
GCA_000983455.1	NP_443729.1	89858	SIGLEC12	FS
GCA_000983455.1	NP_001245233.1	90557	CCDC74A	FS
GCA_000983455.1	NP_001245234.1	90557	CCDC74A	FS
GCA_000983455.1	NP_001245235.1	90557	CCDC74A	FS
GCA_000983455.1	NP_620125.1	90557	CCDC74A	FS
GCA_000983455.1	NP_150376.1	90827	ZNF479	FS
GCA_000983455.1	NP_665697.1	90990	KIFC2	FS
GCA_000983455.1	NP_612401.2	92799	SHKBP1	FS
GCA_000983455.1	NP_001287878.1	94039	ZNF101	FS
GCA_000983455.1	NP_149981.2	94039	ZNF101	FS
GCA_000983455.1	NP_001003690.1	9587	MAD2L1BP	FS
GCA_000983455.1	NP_055443.1	9587	MAD2L1BP	FS
GCA_000983455.1	NP_005091.2	9590	AKAP12	FS
GCA_000983455.1	NP_653080.1	9590	AKAP12	FS
GCA_000983455.1	NP_001073864.2	9625	AATK	FS
GCA_000983455.1	NP_004911.2	9625	AATK	FS
GCA_000983455.1	NP_055511.2	9721	GPRIN2	FS
GCA_000983455.1	NP_055542.1	9757	KMT2B	FS
GCA_000983455.1	NP_055613.1	9842	PLEKHM1	FS
GCA_000983455.1	NP_055627.2	9859	CEP170	FS
GCA_000983455.1	NP_055640.2	9875	URB1	FS
GCA_000983465.1	NP_001265642.1	100131539	ZNF705E	FS
GCA_000983465.1	NP_001138721.1	100132403	FAM157B	FS
GCA_000983465.1	NP_001265516.1	100134391	LOC100134391	FS
GCA_000983465.1	NP_001107875.1	100134938	UPK3BL	FS
GCA_000983465.1	NP_001139113.1	100170229	SRRM5	FS
GCA_000983465.1	NP_005472.2	10025	MED16	FS
GCA_000983465.1	NP_001264264.1	100271927	RASA4B	FS
GCA_000983465.1	NP_878908.4	100287171	WASH1	FS
GCA_000983465.1	NP_006318.1	100287932	TIMM23	FS
GCA_000983465.1	NP_001264254.1	100288332	NPIPA5	FS
GCA_000983465.1	NP_000238.1	100507436	MICA	FS
GCA_000983465.1	NP_001186752.1	100528064	NEDD8-MDP1	FS
GCA_000983465.1	NP_005678.3	10056	FARSB	FS
GCA_000983465.1	NP_001273740.1	100996693	LOC100996693	FS
GCA_000983465.1	NP_001263183.2	101180976	IFNL4	FS
GCA_000983465.1	NP_001273052.1	10246	SLC17A2	FS
GCA_000983465.1	NP_001273054.1	10246	SLC17A2	FS
GCA_000983465.1	NP_005826.1	10246	SLC17A2	FS
GCA_000983465.1	NP_005867.3	10290	SPEG	FS
GCA_000983465.1	NP_005874.1	10297	APC2	FS
GCA_000983465.1	NP_001091059.1	10557	RPP38	FS
GCA_000983465.1	NP_001252530.1	10557	RPP38	FS
GCA_000983465.1	NP_006405.2	10557	RPP38	FS
GCA_000983465.1	NP_892117.1	10557	RPP38	FS
GCA_000983465.1	NP_006549.1	10656	KHDRBS3	FS
GCA_000983465.1	NP_001269916.1	10901	DHRS4	FS
GCA_000983465.1	NP_001269917.1	10901	DHRS4	FS
GCA_000983465.1	NP_001269918.1	10901	DHRS4	FS
GCA_000983465.1	NP_001269919.1	10901	DHRS4	FS
GCA_000983465.1	NP_001269920.1	10901	DHRS4	FS
GCA_000983465.1	NP_066284.2	10901	DHRS4	FS
GCA_000983465.1	NP_001120700.1	10951	CBX1	FS
GCA_000983465.1	NP_006798.1	10951	CBX1	FS
GCA_000983465.1	NP_001291386.1	10990	LILRB5	FS
GCA_000983465.1	NP_001258662.1	11223	MST1L	FS
GCA_000983465.1	NP_009145.1	11231	SEC63	FS
GCA_000983465.1	NP_009163.2	11255	HRH3	FS
GCA_000983465.1	NP_001265354.1	114780	PKD1L2	FS
GCA_000983465.1	NP_443124.3	114780	PKD1L2	FS
GCA_000983465.1	NP_001073903.1	114783	LMTK3	FS
GCA_000983465.1	NP_001171643.1	114836	SLAMF6	FS
GCA_000983465.1	NP_001171644.1	114836	SLAMF6	FS
GCA_000983465.1	NP_001171645.1	114836	SLAMF6	FS
GCA_000983465.1	NP_443163.1	114836	SLAMF6	FS
GCA_000983465.1	NP_085152.2	116983	ACAP3	FS
GCA_000983465.1	NP_001231817.1	116987	AGAP1	FS
GCA_000983465.1	NP_001036000.1	116988	AGAP3	FS
GCA_000983465.1	NP_001295233.1	116988	AGAP3	FS
GCA_000983465.1	NP_114152.3	116988	AGAP3	FS
GCA_000983465.1	NP_061063.2	117247	SLC16A10	FS
GCA_000983465.1	NP_001112.2	120	ADD3	FS
GCA_000983465.1	NP_058432.1	120	ADD3	FS
GCA_000983465.1	NP_063968.1	120	ADD3	FS
GCA_000983465.1	NP_000382.3	1200	TPP1	FS
GCA_000983465.1	NP_001229797.1	122060	SLAIN1	FS
GCA_000983465.1	NP_001273059.1	1258	CNGB1	FS
GCA_000983465.1	NP_001288.3	1258	CNGB1	FS
GCA_000983465.1	NP_001004692.1	127064	OR2T12	FS
GCA_000983465.1	NP_001001821.1	127068	OR2T34	FS
GCA_000983465.1	NP_001004696.1	127074	OR2T4	FS
GCA_000983465.1	NP_001073907.1	127550	A3GALT2	FS
GCA_000983465.1	NP_001120863.1	130540	ALS2CR12	FS
GCA_000983465.1	NP_001276922.1	130540	ALS2CR12	FS
GCA_000983465.1	NP_631902.2	130540	ALS2CR12	FS
GCA_000983465.1	NP_653239.1	131616	TMEM42	FS
GCA_000983465.1	NP_660308.1	133957	CCDC127	FS
GCA_000983465.1	NP_644810.1	134430	WDR36	FS
GCA_000983465.1	NP_001005161.2	143496	OR52B4	FS
GCA_000983465.1	NP_000751.1	1441	CSF3R	FS
GCA_000983465.1	NP_724781.1	1441	CSF3R	FS
GCA_000983465.1	NP_758519.1	1441	CSF3R	FS
GCA_000983465.1	NP_001186750.1	145553	MDP1	FS
GCA_000983465.1	NP_612485.2	145553	MDP1	FS
GCA_000983465.1	NP_001096082.2	145814	PGPEP1L	FS
GCA_000983465.1	NP_001161374.1	145814	PGPEP1L	FS
GCA_000983465.1	NP_001290199.1	146754	DNAH2	FS
GCA_000983465.1	NP_001284553.1	147657	ZNF480	FS
GCA_000983465.1	NP_653285.2	147657	ZNF480	FS
GCA_000983465.1	NP_001287975.1	147906	DACT3	FS
GCA_000983465.1	NP_659493.2	147906	DACT3	FS
GCA_000983465.1	NP_612143.2	148213	ZNF681	FS
GCA_000983465.1	NP_689704.4	148811	PM20D1	FS
GCA_000983465.1	NP_001258791.1	154197	PNLDC1	FS
GCA_000983465.1	NP_775787.1	154197	PNLDC1	FS
GCA_000983465.1	NP_001073980.2	154790	CLEC2L	FS
GCA_000983465.1	NP_000768.1	1577	CYP3A5	FS
GCA_000983465.1	NP_001177413.1	1577	CYP3A5	FS
GCA_000983465.1	NP_001278759.1	1577	CYP3A5	FS
GCA_000983465.1	NP_000770.2	1580	CYP4B1	FS
GCA_000983465.1	NP_001093242.1	1580	CYP4B1	FS
GCA_000983465.1	NP_001006939.2	158931	TCEAL6	FS
GCA_000983465.1	NP_000776.1	1594	CYP27B1	FS
GCA_000983465.1	NP_001010860.1	161394	SAMD15	FS
GCA_000983465.1	NP_714544.1	161497	STRC	FS
GCA_000983465.1	NP_570971.1	161725	OTUD7A	FS
GCA_000983465.1	NP_722520.2	161882	ZFPM1	FS
GCA_000983465.1	NP_001244073.1	1663	DDX11	FS
GCA_000983465.1	NP_001244074.1	1663	DDX11	FS
GCA_000983465.1	NP_004390.3	1663	DDX11	FS
GCA_000983465.1	NP_085911.2	1663	DDX11	FS
GCA_000983465.1	NP_689651.1	1663	DDX11	FS
GCA_000983465.1	NP_612152.1	168507	PKD1L1	FS
GCA_000983465.1	NP_001005336.1	1759	DNM1	FS
GCA_000983465.1	NP_001275666.1	1759	DNM1	FS
GCA_000983465.1	NP_001275667.1	1759	DNM1	FS
GCA_000983465.1	NP_001275668.1	1759	DNM1	FS
GCA_000983465.1	NP_004399.2	1759	DNM1	FS
GCA_000983465.1	NP_001230005.1	1871	E2F3	FS
GCA_000983465.1	NP_001940.1	1871	E2F3	FS
GCA_000983465.1	NP_932157.1	1912	PHC2	FS
GCA_000983465.1	NP_061889.2	192666	KRT24	FS
GCA_000983465.1	NP_001400.3	1953	MEGF6	FS
GCA_000983465.1	NP_997320.2	196385	DNAH10	FS
GCA_000983465.1	NP_689867.1	199699	DAND5	FS
GCA_000983465.1	NP_963840.2	200008	CDCP2	FS
GCA_000983465.1	NP_808881.3	201626	PDE12	FS
GCA_000983465.1	NP_000497.1	2147	F2	FS
GCA_000983465.1	NP_001298186.1	2147	F2	FS
GCA_000983465.1	NP_000560.5	2214	FCGR3A	FS
GCA_000983465.1	NP_001121064.1	2214	FCGR3A	FS
GCA_000983465.1	NP_031387.3	22795	NID2	FS
GCA_000983465.1	NP_001008701.1	22859	ADGRL1	FS
GCA_000983465.1	NP_055736.2	22859	ADGRL1	FS
GCA_000983465.1	NP_001129665.1	22868	FASTKD2	FS
GCA_000983465.1	NP_001129666.1	22868	FASTKD2	FS
GCA_000983465.1	NP_055744.2	22868	FASTKD2	FS
GCA_000983465.1	NP_036362.3	22932	POMZP3	FS
GCA_000983465.1	NP_997188.2	2298	FOXD4	FS
GCA_000983465.1	NP_996882.1	23019	CNOT1	FS
GCA_000983465.1	NP_001239029.1	23046	KIF21B	FS
GCA_000983465.1	NP_001239031.1	23046	KIF21B	FS
GCA_000983465.1	NP_001239032.1	23046	KIF21B	FS
GCA_000983465.1	NP_060066.2	23046	KIF21B	FS
GCA_000983465.1	NP_569731.2	23117	NPIPB3	FS
GCA_000983465.1	NP_055951.2	23166	STAB1	FS
GCA_000983465.1	NP_055430.1	23199	GSE1	FS
GCA_000983465.1	NP_001277185.1	23351	KHNYN	FS
GCA_000983465.1	NP_001277186.1	23351	KHNYN	FS
GCA_000983465.1	NP_056114.1	23351	KHNYN	FS
GCA_000983465.1	NP_056123.2	23360	FNBP4	FS
GCA_000983465.1	NP_115485.1	23440	OTP	FS
GCA_000983465.1	NP_001180400.1	2346	FOLH1	FS
GCA_000983465.1	NP_001180401.1	2346	FOLH1	FS
GCA_000983465.1	NP_055114.1	23476	BRD4	FS
GCA_000983465.1	NP_490597.1	23476	BRD4	FS
GCA_000983465.1	NP_000795.2	2352	FOLR3	FS
GCA_000983465.1	NP_061830.3	23616	SH3BP1	FS
GCA_000983465.1	NP_037412.2	23769	FLRT1	FS
GCA_000983465.1	NP_001265227.1	256076	COL6A5	FS
GCA_000983465.1	NP_001271221.1	256646	NUTM1	FS
GCA_000983465.1	NP_001271222.1	256646	NUTM1	FS
GCA_000983465.1	NP_786883.1	256646	NUTM1	FS
GCA_000983465.1	NP_001161750.1	25937	WWTR1	FS
GCA_000983465.1	NP_001161752.1	25937	WWTR1	FS
GCA_000983465.1	NP_056287.1	25937	WWTR1	FS
GCA_000983465.1	NP_056327.4	25981	DNAH1	FS
GCA_000983465.1	NP_054764.2	26020	LRP10	FS
GCA_000983465.1	NP_056412.5	26086	GPSM1	FS
GCA_000983465.1	NP_056474.2	26156	RSL1D1	FS
GCA_000983465.1	NP_056482.2	26165	SPATA31A7	FS
GCA_000983465.1	NP_000504.1	2652	OPN1MW	FS
GCA_000983465.1	NP_001005224.1	26683	OR4F3	FS
GCA_000983465.1	NP_001304036.1	26687	OR4E1	FS
GCA_000983465.1	NP_001254489.1	27134	TJP3	FS
GCA_000983465.1	NP_001254490.1	27134	TJP3	FS
GCA_000983465.1	NP_001258886.1	27173	SLC39A1	FS
GCA_000983465.1	NP_001258887.1	27173	SLC39A1	FS
GCA_000983465.1	NP_001258888.1	27173	SLC39A1	FS
GCA_000983465.1	NP_001258889.1	27173	SLC39A1	FS
GCA_000983465.1	NP_055252.2	27173	SLC39A1	FS
GCA_000983465.1	NP_001291317.1	283685	GOLGA6L2	FS
GCA_000983465.1	NP_001230467.1	283710	LOC283710	FS
GCA_000983465.1	NP_001001413.3	283767	GOLGA6L1	FS
GCA_000983465.1	NP_001164226.1	284565	NBPF15	FS
GCA_000983465.1	NP_775909.2	284565	NBPF15	FS
GCA_000983465.1	NP_778234.2	285955	SPDYE1	FS
GCA_000983465.1	NP_001123498.2	285966	TCAF2	FS
GCA_000983465.1	NP_940890.3	286077	FAM83H	FS
GCA_000983465.1	NP_054754.1	28966	SNX24	FS
GCA_000983465.1	NP_037452.1	29915	HCFC2	FS
GCA_000983465.1	NP_001291311.1	2994	GYPB	FS
GCA_000983465.1	NP_002091.3	2994	GYPB	FS
GCA_000983465.1	NP_001280118.1	29991	OBP2A	FS
GCA_000983465.1	NP_001091672.1	3090	HIC1	FS
GCA_000983465.1	NP_006488.2	3090	HIC1	FS
GCA_000983465.1	NP_001180564.1	317749	DHRS4L2	FS
GCA_000983465.1	NP_001180565.1	317749	DHRS4L2	FS
GCA_000983465.1	NP_001180566.1	317749	DHRS4L2	FS
GCA_000983465.1	NP_932349.2	317749	DHRS4L2	FS
GCA_000983465.1	NP_076920.1	3214	HOXB4	FS
GCA_000983465.1	NP_001157.1	329	BIRC2	FS
GCA_000983465.1	NP_001243092.1	329	BIRC2	FS
GCA_000983465.1	NP_001243095.1	329	BIRC2	FS
GCA_000983465.1	NP_000862.1	3362	HTR6	FS
GCA_000983465.1	NP_853643.1	337973	KRTAP19-6	FS
GCA_000983465.1	NP_001012661.1	339344	MYPOP	FS
GCA_000983465.1	NP_950252.1	339479	BRINP3	FS
GCA_000983465.1	NP_001264198.1	340990	OTOG	FS
GCA_000983465.1	NP_001278992.1	340990	OTOG	FS
GCA_000983465.1	NP_001008784.2	344807	CD200R1L	FS
GCA_000983465.1	NP_001186144.1	344807	CD200R1L	FS
GCA_000983465.1	NP_899231.2	345062	PRSS48	FS
GCA_000983465.1	NP_001004450.1	347169	OR1B1	FS
GCA_000983465.1	NP_954714.2	349334	FOXD4L4	FS
GCA_000983465.1	NP_001193934.1	353355	ZNF233	FS
GCA_000983465.1	NP_861421.2	353355	ZNF233	FS
GCA_000983465.1	NP_002182.1	3623	INHA	FS
GCA_000983465.1	NP_001159921.1	3700	ITIH4	FS
GCA_000983465.1	NP_002209.2	3700	ITIH4	FS
GCA_000983465.1	NP_002212.3	3707	ITPKB	FS
GCA_000983465.1	NP_000206.2	3718	JAK3	FS
GCA_000983465.1	NP_066292.2	3768	KCNJ12	FS
GCA_000983465.1	NP_001268900.1	3809	KIR2DS4	FS
[truncated: 2,043 more rows]
